# Supplementary material for: Synthesis of new tetra- and pentacyclic, methylenedioxy- and ethylenedioxy-substituted derivatives of the dibenzo[ c , f ][1,2]thiazepine ring system
Source: publisher site journal article supplement (doi:10.3762/bjoc.21.205), 2025-12-09

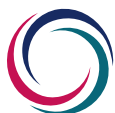

## Supporting Information

for

### **Synthesis of new tetra- and pentacyclic, methylenedioxy- and ethylenedioxy-substituted derivatives of the dibenzo[*c,f*][1,2]thiazepine ring system**

Gábor Berecz, András Dancsó, Mária Tóthné Lauritz, Loránd Kiss, Gyula Simig and Balázs Volk

*Beilstein J. Org. Chem.* **2025**, *21*, 2645–2656. [doi:10.3762/bjoc.21.205](https://doi.org/10.3762/bjoc.21.205)

**Experimental procedures and characterization of compounds 6, 10–19, 20a–e, 21c–p, 23a–e, 24, 26–28, 30–37, 38a–d, 39–44, 45a–c, 46–53, 54a–f. <sup>1</sup>H and <sup>13</sup>C NMR spectra of all new compounds. 2D NMR spectra of compounds 6–8, 12, 21a, 21b, 25–27, 30, 32, 38b, 42, 50, 51, 54e**

## Table of contents

Experimental procedures and characterization of compounds **6, 10–19, 20a–e, 21c–p, 23a–e, 24, 26–28, 30–37, 38a–d, 39–44, 45a–c, 46, 48–53, 54a–f** ..... S2

<sup>1</sup>H and <sup>13</sup>C NMR spectra of compounds **6–8, 10–19, 20a–e, 21a–p, 23a–e, 24–37, 38a–d, 39–43, 45a–c, 46, 48–53, 54a–f** (including 2D NMR spectra of compounds **6–8, 12, 21a, 21b, 25–27, 30, 32, 38b, 42, 50, 51, 54e**) ..... S39

**Methyl 2-(1,3-benzodioxol-5-ylsulfamoyl)-4-chlorobenzoate (10).** To a vigorously stirred solution of 1,3-benzodioxol-5-amine (14.40 g, 105 mmol) and *N,N*-diethylaniline (15.67 g, 105 mmol, 16.7 mL) in MeOH (150 mL), methyl 4-chloro-2-chlorosulfonylbenzoate (**9**, 26.91 g, 100 mmol) was added over a period of 5 min while cooling the reaction mixture with tap water. It was stirred at room temperature for 1 h and at 0–5 °C for 1 h. The crystalline product separated was filtered and purified by dry-column flash chromatography on a short silica gel column (thickness of stationary phase: 30 mm, eluent: heptane/DCM 1:1, DCM). After evaporation of the solvents, the solid residue was triturated with MeOH, filtered and air-dried to afford **10** (35.10 g, 95%) as colorless crystals. M. p. 166.5–168.5 °C (CH<sub>3</sub>CN). IR (KBr): 3227, 1713, 1292, 1171, 1031, 690 cm<sup>-1</sup>. <sup>1</sup>H NMR (500 MHz, DMSO-*d*<sub>6</sub>): 10.05 (br s, 1H), 7.86 (d, <sup>4</sup>*J* = 2.1 Hz, 1H), 7.79 (dd, <sup>4</sup>*J* = 2.1 Hz, <sup>3</sup>*J* = 8.3 Hz, 1H), 7.68 (d, <sup>3</sup>*J* = 8.3 Hz, 1H), 6.82 (d, <sup>3</sup>*J* = 8.3 Hz, 1H), 6.68 (d, <sup>4</sup>*J* = 2.2 Hz, 1H), 6.53 (dd, <sup>4</sup>*J* = 2.2 Hz, <sup>3</sup>*J* = 8.3 Hz, 1H), 5.99 (s, 2H), 3.83 (s, 3H). <sup>13</sup>C NMR (125 MHz, DMSO-*d*<sub>6</sub>): 166.72, 147.71, 145.10, 138.78, 135.52, 133.08, 131.35, 131.04, 130.51, 128.25, 115.57, 108.50, 104.13, 101.63, 53.31. MS (EI): M<sup>+</sup> = 369 (1 Cl). HRMS (ESI): *m/z* calcd. for C<sub>15</sub>H<sub>13</sub>ClNO<sub>6</sub>S [M+H]<sup>+</sup>: 370.0146, found: 370.0151.

**Methyl 4-chloro-2-(2,3-dihydro-1,4-benzodioxin-6-ylsulfamoyl)benzoate (11).** To a vigorously stirred solution of 2,3-dihydro-1,4-benzodioxin-6-amine (29.03 g, 192 mmol) and *N,N*-diethylaniline (28.65 g, 192 mmol, 30.6 mL) in MeOH (300 mL), methyl 4-chloro-2-chlorosulfonylbenzoate (**9**, 50.05 g, 186 mmol) was added over a period of 10 min while cooling the reaction mixture with tap water. An exothermic reaction took place, and the product started to crystallize. The brown suspension was stirred at room temperature for 1 h, then at 0–5 °C for 1 h. The crystalline product was filtered and purified by dry-column flash chromatography on a short silica gel column (thickness of stationary phase: 30 mm, eluent: DCM). After evaporation of the solvent, the solid residue was triturated with MeOH, filtered and air-dried to afford **11** (66.0 g, 92%) as colorless crystals. M. p. 153–154 °C (MeOH). IR (KBr): 3266, 1715, 1504, 1175 cm<sup>-1</sup>. <sup>1</sup>H NMR (200 MHz, CDCl<sub>3</sub>): 7.96 (br s, 1H), 7.83 (d, <sup>4</sup>*J* = 1.8 Hz, 1H), 7.80 (d, <sup>3</sup>*J* = 7.7 Hz, 1H), 7.54 (dd, <sup>4</sup>*J* = 2.2 Hz, <sup>3</sup>*J* = 8.4 Hz, 1H), 6.70 (d, <sup>3</sup>*J* = 8.4 Hz, 1H), 6.70 (d, <sup>4</sup>*J* = 2.6 Hz, 1H), 6.59 (dd, <sup>4</sup>*J* = 2.6 Hz, <sup>3</sup>*J* = 8.8 Hz, 1H), 4.20 (s, 4H), 4.02 (s, 3H). <sup>13</sup>C NMR (50 MHz, CDCl<sub>3</sub>): 167.26, 143.60, 142.25, 140.17, 138.18, 132.42, 132.15, 130.64, 129.27, 128.45, 117.48, 116.99, 113.12, 64.21, 64.11, 53.63. MS (ESI): [M-H]<sup>-</sup> = 382 (1 Cl). HRMS (ESI): *m/z* calcd. for C<sub>16</sub>H<sub>15</sub>ClNO<sub>6</sub>S [M+H]<sup>+</sup>: 384.0303, found: 384.0309.

**Methyl 2-[1,3-benzodioxol-5-yl(methyl)sulfamoyl]-4-chlorobenzoate (12).** To a solution of compound **10** (31.08 g, 84 mmol) in DMF (75 mL), anhydrous K<sub>2</sub>CO<sub>3</sub> (15.20 g, 110 mmol) was added. To the vigorously stirred suspension iodomethane (15.61 g, 110 mmol, 6.9 mL) was added dropwise and the reaction mixture was stirred at room temperature for 4 h. Water (450 mL) was added and a thick oil separated. The supernatant was decanted, the oil was dissolved in DCM (100 mL), the solution was washed with water (2 × 100 mL), the organic phase was dried over Na<sub>2</sub>SO<sub>4</sub> and evaporated in vacuo. The residual dense orange oil was dissolved in a heptane/DCM mixture 2:1 (150 mL), silica gel (20 g, Kieselgel 60 H) was added, and it was stirred at room temperature for 30 min. The filtrate was evaporated in vacuo to afford **12** (31.4 g of dense yellow oil, yield 97%). The TLC pure intermediate was transformed in the next step without further purification. IR (film): 1739, 1484, 1354, 1292, 1253, 1162, 1120, 1057, 1037, 940, 836 cm<sup>-1</sup>. <sup>1</sup>H NMR (600 MHz, CDCl<sub>3</sub>): 7.56 (dd, <sup>4</sup>J = 2.1 Hz, <sup>3</sup>J = 8.2 Hz, 1H), 7.46 (d, <sup>4</sup>J = 2.0 Hz, 1H), 7.44 (d, <sup>3</sup>J = 8.2 Hz, 1H), 6.73 (d, <sup>3</sup>J = 8.3 Hz, 1H), 6.72 (d, <sup>4</sup>J = 2.2 Hz, 1H), 6.60 (dd, <sup>4</sup>J = 2.2 Hz, <sup>3</sup>J = 8.3 Hz, 1H), 6.00 (s, 2H), 3.89 (s, 3H), 3.26 (s, 3H). <sup>13</sup>C NMR (150 MHz, CDCl<sub>3</sub>): 167.44, 147.94, 147.29, 136.96, 135.97, 134.40, 132.44, 131.66, 129.92, 129.51, 121.11, 109.04, 108.07, 101.74, 53.27, 39.43. COSY: 7.46–7.56–7.44, 6.73–6.60–6.72. HSQC (140 Hz): 7.56–132.44, 7.46–129.92, 7.44–129.51, 6.73–108.07, 6.72–109.04, 6.60–121.11, 6.00–101.72, 3.89–53.27, 3.26–39.43. HMBC (8 Hz, 140 Hz): 7.56–131.66, 7.46–(135.97, 132.44, 131.66), 7.44–(167.44, 136.96, 135.97), 6.73–(147.94, 134.40), 6.72–(147.29, 121.11), 6.60–(147.29, 109.04), 6.00–(147.94, 147.29), 3.89–167.44, 3.26–134.40. HRMS (ESI): m/z calcd. for C<sub>16</sub>H<sub>15</sub>ClNO<sub>6</sub>S [M+H]<sup>+</sup>: 384.0304, found: 384.0307.

**Methyl 4-chloro-2-[2,3-dihydro-1,4-benzodioxin-6-yl(methyl)sulfamoyl]benzoate (13).** To a solution of compound **11** (46.06 g, 120 mmol) in DMF (100 mL), anhydrous K<sub>2</sub>CO<sub>3</sub> (21.56 g, 156 mmol) was added, and the suspension was stirred at room temperature for 15 min. To the vigorously stirred suspension iodomethane (22.14 g, 156 mmol, 9.7 mL) was added dropwise while cooling the reaction mixture with tap water. The reaction mixture was stirred at room temperature for 1 h. Water (700 mL) was added and the suspension obtained was stirred at room temperature for 2 h. The product separated was filtered, washed with water (2 × 100 mL), and air-dried to give **13** (47.05 g, 98%) as colorless crystals, suitable to transform in the next step without further purification. A small sample was subjected to dry-column chromatography on a short silica gel column (thickness of stationary phase: 30 mm, eluent: heptane/DCM 2:1, 1:1, DCM). After evaporation of solvents, the oily residue was triturated with cold DIPE to afford pure **13** as colorless crystals. M. p. 97–99 °C (MeOH). IR (KBr): 1733, 1498, 1345, 1294, 1059 cm<sup>-1</sup>. <sup>1</sup>H NMR (200 MHz, CDCl<sub>3</sub>): 7.54 (dd, <sup>4</sup>J = 1.8 Hz, <sup>3</sup>J = 8.1 Hz, 1H), 7.43 (d, <sup>3</sup>J = 8.1 Hz,

1H), 7.43 (d,  $^4J = 2.2$  Hz, 1H), 6.80 (d,  $^3J = 8.8$  Hz, 1H), 6.72 (d,  $^4J = 2.6$  Hz, 1H), 6.65 (dd,  $^4J = 2.6$  Hz,  $^3J = 8.8$  Hz, 1H), 4.25 (s, 4H), 3.87 (s, 3H), 3.24 (s, 3H).  $^{13}\text{C}$  NMR (50 MHz,  $\text{CDCl}_3$ ): 167.39, 143.48, 143.33, 136.98, 135.85, 133.80, 132.32, 131.64, 129.83, 129.45, 120.53, 117.31, 116.71, 64.26, 64.16, 53.16, 39.13. MS (GC-EI):  $\text{M}^+ = 397$  (1 Cl). HRMS (ESI):  $m/z$  calcd. for  $\text{C}_{17}\text{H}_{17}\text{ClNO}_6\text{S}$   $[\text{M}+\text{H}]^+$ : 398.0459, found: 398.0467.

**2-[1,3-Benzodioxol-5-yl(methyl)sulfamoyl]-4-chlorobenzoic acid (14).** A solution of NaOH (8.00 g, 200 mmol) in water (150 mL) was added to the solution of compound **12** (30.70 g, 80 mmol) in MeOH (150 mL) and it was refluxed for 1 h. Water (750 mL) was added, the solution was cooled with ice-water, and an aqueous HCl solution (5%, 150 mL, 205 mmol HCl) was added in 20 min (pH 1). The colorless suspension obtained was stirred for 30 min while cooling with ice-water, it was filtered, washed with water, and dried over  $\text{P}_2\text{O}_5$  to afford **14** (28.6 g, 97%) as off-white crystals. M. p. 153–155 °C ( $\text{CH}_3\text{CN}$ , colorless crystals). IR (KBr): 2700, 1706, 1337, 844  $\text{cm}^{-1}$ .  $^1\text{H}$  NMR (500 MHz,  $\text{DMSO}-d_6$ ): 13.7 (br s, 1H), 7.81 (dd,  $^4J = 2.0$  Hz,  $^3J = 8.2$  Hz, 1H), 7.66 (d,  $^3J = 8.2$  Hz, 1H), 7.32 (d,  $^4J = 1.8$  Hz, 1H), 6.88 (d,  $^3J = 8.2$  Hz, 1H), 6.82 (d,  $^4J = 1.9$  Hz, 1H), 6.64 (dd,  $^4J = 2.2$  Hz,  $^3J = 8.2$  Hz, 1H), 6.06 (s, 2H), 3.19 (s, 3H).  $^{13}\text{C}$  NMR (125 MHz,  $\text{DMSO}-d_6$ ): 168.03, 147.63, 146.92, 135.70, 134.34, 134.08, 133.88, 133.26, 130.22, 128.85, 121.00, 108.70, 108.20, 101.93, 39.14. MS (EI):  $\text{M}^+ = 369$  (1 Cl). HRMS (ESI):  $m/z$  calcd. for  $\text{C}_{15}\text{H}_{13}\text{ClNO}_6\text{S}$   $[\text{M}+\text{H}]^+$ : 370.0146, found: 370.0146.

**4-Chloro-2-[2,3-dihydro-1,4-benzodioxin-6-yl(methyl)sulfamoyl]benzoic acid (15).** A solution of NaOH (11.80 g, 295 mmol) in water (200 mL) was added to the suspension of compound **13** (46.94 g, 118 mmol) in MeOH (200 mL) and the mixture was refluxed for 1 h. The solution obtained was diluted with water (750 mL), cooled with ice-water, and an aqueous HCl solution (5%, 225 mL, 308 mmol HCl) was added in 20 min (pH 1). The partly oily product separated was stirred at room temperature for 3 h. The suspension obtained was filtered, washed thoroughly with water ( $3 \times 100$  mL), and dried over  $\text{P}_2\text{O}_5$  to afford **15** (44.8 g, 99%) as off-white crystals. M. p. 156–158 °C ( $\text{CH}_3\text{CN}$ , colorless crystals). IR (KBr): 3251, 1740, 1504, 1337, 1232, 1065  $\text{cm}^{-1}$ .  $^1\text{H}$  NMR (200 MHz,  $\text{DMSO}-d_6$ ): 13.68 (br s, 1H), 7.81 (dd,  $^4J = 1.8$  Hz,  $^3J = 8.2$  Hz, 1H), 7.67 (d,  $^3J = 8.2$  Hz, 1H), 7.29 (d,  $^4J = 1.8$  Hz, 1H), 6.85 (d,  $^3J = 8.5$  Hz, 1H), 6.73 (d,  $^4J = 2.1$  Hz, 1H), 6.65 (dd,  $^4J = 2.4$  Hz,  $^3J = 8.6$  Hz, 1H), 4.24 (s, 4H), 3.19 (s, 3H).  $^{13}\text{C}$  NMR (50 MHz,  $\text{DMSO}-d_6$ ): 168.05, 143.40, 143.23, 135.82, 134.16, 133.69, 133.63, 133.24, 130.22, 128.83, 120.15, 117.31, 116.39, 64.23, 38.97. MS (EI):  $\text{M}^+ = 383$  (1 Cl). HRMS (ESI):  $m/z$  calcd. for  $\text{C}_{16}\text{H}_{15}\text{ClNO}_6\text{S}$   $[\text{M}+\text{H}]^+$ : 384.0303, found: 384.0310.

**8-Chloro-5-methyl[1,3]benzodioxolo[5,6-*c*]benzo[*f*][1,2]thiazepin-11(5*H*)-one 6,6-dioxide (6).** To the suspension of **14** (24.04 g, 65 mmol) in DCM (200 mL), PCl<sub>5</sub> (16.24 g, 78 mmol) was added in portions, and the solution obtained was refluxed for 8.5 h. It was cooled to 0–5 °C, and SnCl<sub>4</sub> (37.25 g, 143 mmol, 16.7 mL) was added dropwise over a period of 10 min. The thick suspension obtained was stirred at 0–5 °C for 2 h, then it was allowed to warm to room temperature. The orange suspension was poured onto a mixture of crushed ice (600 g) and conc hydrochloric acid (50 mL) and DCM (100 mL). The mixture was stirred until warming to room temperature (1 h), the product separated was filtered, washed with diluted hydrochloric acid (5%, 2 × 50 mL) and water (2 × 50 mL), and air-dried to give crude **6** (17.17 g of yellow solid). The two-phase filtrate was separated, the strongly acidic aqueous phase was washed with DCM (2 × 50 mL), the combined organic phases were washed with water (100 mL), dried over Na<sub>2</sub>SO<sub>4</sub>, evaporated, and the oily residue was triturated with ether (50 mL) to afford a second crop of **6** (1.94 g of brown solid). The two crops were purified by dry-column flash chromatography on a short silica gel column (thickness of the stationary phase: 30 mm, eluent: DCM). After evaporation of the solvent, the residue was triturated with Et<sub>2</sub>O (50 mL) to give **6** (17.34 g, 76%) as pale yellow crystals. M. p. 268–271 °C (CH<sub>3</sub>CN, decomp.). IR (KBr): 1639, 1623, 1482, 1353, 1245, 1033 cm<sup>-1</sup>. <sup>1</sup>H NMR (600 MHz, CDCl<sub>3</sub>): 8.01 (d, <sup>3</sup>*J* = 8.4 Hz, 1H), 7.95 (d, <sup>4</sup>*J* = 2.2 Hz, 1H), 7.74 (s, 1H), 7.67 (dd, <sup>4</sup>*J* = 2.2 Hz, <sup>3</sup>*J* = 8.4 Hz, 1H), 6.79 (s, 1H), 6.11 (s, 2H), 3.24 (s, 3H). <sup>13</sup>C NMR (150 MHz, CDCl<sub>3</sub>): 186.97, 153.31, 147.00, 138.76, 137.99, 137.95, 133.99, 133.81, 133.18, 126.34, 125.87, 109.94, 105.60, 102.88, 39.38. COSY: 8.01–7.67–7.95. HSQC (140 Hz): 8.01–133.99, 7.95–125.878, 7.74–109.94, 7.67–133.18, 6.79–105.60, 6.11–102.88, 3.24–39.38. HMBC (8 Hz, 140 Hz): 8.01–(186.97, 138.76, 137.99), 7.95–(133.81, 133.18), 7.74–(186.97, 153.31, 137.95), 7.67–(133.81, 125.87), 6.79–(153.31, 147.00, 137.95, 126.34), 6.11–(153.31, 147.00), 3.24–137.95. MS (EI): M<sup>+</sup> = 351 (1 Cl). HRMS (ESI): *m/z* calcd. for C<sub>15</sub>H<sub>11</sub>ClNO<sub>5</sub>S [M+H]<sup>+</sup>: 352.0041, found: 352.0043.

**8-Chloro-5-methyl-5,11-dihydro[1,3]benzodioxolo[5,6-*c*]benzo[*f*][1,2]thiazepin-11-ol 6,6-dioxide (16).** To a suspension of **6** (7.04 g, 20 mmol) in DMF (100 mL) and EtOH (100 mL), NaBH<sub>4</sub> (1.51 g, 40 mmol) was added, and the reaction mixture was stirred at room temperature for 4.5 h. Water (800 mL) was added dropwise in 30 min. The separated product was filtered, washed with water, and dried in vacuo over P<sub>2</sub>O<sub>5</sub> to give **16** (6.72 g, 95%) as colorless crystals. M. p. decomp. from 200 °C (CH<sub>3</sub>CN). IR (KBr): 3452, 1503, 1481, 1308, 1141, 1036 cm<sup>-1</sup>. <sup>1</sup>H NMR (500 MHz, DMSO-*d*<sub>6</sub>): 7.86 (dd, <sup>4</sup>*J* = 0.6 Hz, <sup>3</sup>*J* = 8.7 Hz, 1H), 7.76 (d, <sup>4</sup>*J* = 2.2 Hz, 1H), 7.70 (dd, <sup>4</sup>*J* = 2.2 Hz, <sup>3</sup>*J* = 8.4 Hz, 1H), 7.18 (s, 1H), 7.04 (s, 1H), 6.60 (d, <sup>3</sup>*J* = 5.0 Hz, 1H), 6.16 (d, <sup>3</sup>*J* = 4.9 Hz, 1H), 6.09 (d, <sup>4</sup>*J* = 1.0 Hz, 1H), 6.04 (d, <sup>4</sup>*J* = 1.0 Hz, 1H), 3.37 (s, 3H).

$^{13}\text{C}$  NMR (125 MHz, DMSO- $d_6$ ): 147.58, 147.33, 140.39, 139.82, 138.34, 132.83, 132.12, 129.01, 128.07, 126.66, 108.70, 105.10, 102.15, 67.51, 37.20. MS (EI):  $M^+$  = 353 (1 Cl). HRMS (ESI):  $m/z$  calcd. for  $\text{C}_{15}\text{H}_{12}\text{ClNNaO}_5\text{S}$  [ $M+\text{Na}$ ] $^+$ : 376.0017, found: 376.0022.

**9-Chloro-6-methyl-2,3,6,12-tetrahydro[1,4]benzodioxino[6,7-*c*]benzo[*f*][1,2]thiazepin-12-ol 7,7-dioxide (17).** To a suspension of **7** (15.00 g, 41 mmol) in DMF (100 mL) and EtOH (100 mL),  $\text{NaBH}_4$  (3.10 g, 82 mmol) was added, and the reaction mixture was stirred at room temperature for 23 h. Water (800 mL) was added dropwise in 30 min. The product separated was filtered, washed with water, and dried in vacuo over  $\text{P}_2\text{O}_5$  to give **17** (14.75 g, 98%) as colorless crystals. M. p. decomp. from 180 °C ( $\text{CH}_3\text{CN}$ ). IR (KBr): 3531, 1500, 1303, 1134, 1064  $\text{cm}^{-1}$ .  $^1\text{H}$  NMR (200 MHz, DMSO- $d_6$ ): 7.85 (d,  $^3J = 8.4$  Hz, 1H), 7.75 (d,  $^4J = 1.8$  Hz, 1H), 7.70 (dd,  $^4J = 2.2$  Hz,  $^3J = 8.4$  Hz, 1H), 7.05 (s, 1H), 7.02 (d,  $^4J = 0.7$  Hz, 1H), 6.53 (d,  $^3J = 3.3$  Hz, 1H), 6.10 (bd,  $^4J = 2.6$  Hz, 1H), 4.24 (s, 4H), 3.33 (s, 3H).  $^{13}\text{C}$  NMR (50 MHz, DMSO- $d_6$ ): 143.53, 143.23, 140.34, 139.44, 136.21, 132.76, 132.23, 128.95, 128.65, 126.67, 117.01, 114.25, 67.95, 64.33, 64.24, 37.88. MS (EI):  $M^+$  = 367 (1 Cl). HRMS (ESI):  $m/z$  calcd. for  $\text{C}_{16}\text{H}_{14}\text{ClNNaO}_5\text{S}$  [ $M+\text{Na}$ ] $^+$ : 390.0173, found: 390.0176.

**8,11-Dichloro-5-methyl-5,11-dihydro[1,3]benzodioxolo[5,6-*c*]benzo[*f*][1,2]thiazepine 6,6-dioxide (18).** To a vigorously stirred suspension of **16** (6.19 g, 17.5 mmol) in DCM (40 mL),  $\text{SOCl}_2$  (1.52 mL, 2.50 g, 21 mmol) was added dropwise at room temperature. The solution obtained was stirred at room temperature for 1.5 h, then evaporated in vacuo. The residue was triturated with DIPE (20 mL), filtered and dried in vacuo to give crude **18** (6.51 g, 100%) as colorless crystals. M. p. decomp. from 164 °C. The product is of suitable quality for use in the next step. IR (KBr): 1503, 1490, 1340, 1229, 1031  $\text{cm}^{-1}$ .  $^1\text{H}$  NMR (500 MHz,  $\text{CDCl}_3$ ): 7.96 (d,  $^4J = 2.1$  Hz, 1H), 7.48 (dd,  $^4J = 2.2$  Hz,  $^3J = 8.3$  Hz, 1H), 7.42 (d,  $^3J = 8.3$  Hz, 1H), 6.94 (s, 1H), 6.82 (s, 1H), 6.06 (d,  $^4J = 1.4$  Hz, 1H), 6.02 (d,  $^4J = 1.3$  Hz, 1H), 5.98 (s, 1H), 3.52 (s, 3H).  $^{13}\text{C}$  NMR (125 MHz,  $\text{CDCl}_3$ ): 149.78, 147.65, 141.50, 136.17, 133.54, 133.11, 132.49, 132.33, 131.19, 127.89, 109.51, 108.97, 102.53, 63.30, 38.98. MS (EI):  $M^+$  = 371 (2 Cl). HRMS (TOF MS EI):  $m/z$  calcd. for  $[\text{C}_{15}\text{H}_{11}\text{Cl}_2\text{NO}_4\text{S}]^+$ : 370.9786, found: 370.9796.

**9,12-Dichloro-6-methyl-2,3,6,12-tetrahydro[1,4]benzodioxino[6,7-*c*]benzo[*f*][1,2]thiazepine 7,7-dioxide (19).** To a vigorously stirred suspension of **17** (14.71 g, 40 mmol) in DCM (80 mL),  $\text{SOCl}_2$  (3.5 mL, 5.71 g, 48 mmol) was added dropwise at room temperature. The solution obtained was stirred at room temperature for 3.5 h. Hexane (240 mL) was added to the suspension formed; the product was filtered, washed with hexane ( $2 \times 30$  mL) and dried in vacuo to give crude **19** (14.50 g, 94%) as colorless crystals. M. p. decomp. from 160 °C. The product is of suitable quality for use in the next step. IR (KBr): 1512, 1327, 1142,

1065  $\text{cm}^{-1}$ .  $^1\text{H}$  NMR (200 MHz,  $\text{CDCl}_3$ ): 7.97 (d,  $^4J = 1.8$  Hz, 1H), 7.48 (dd,  $^4J = 2.0$  Hz,  $^3J = 8.4$  Hz, 1H), 7.43 (d,  $^3J = 8.4$  Hz, 1H), 7.02 (s, 1H), 6.90 (s, 1H), 5.99 (s, 1H), 4.26 (s, 4H), 3.52 (s, 3H).  $^{13}\text{C}$  NMR (50 MHz,  $\text{CDCl}_3$ ): 145.42, 143.38, 141.71, 136.08, 133.52, 132.69, 132.32, 132.11, 130.27, 127.98, 118.30, 118.25, 64.32, 64.25, 63.39, 39.26. MS (EI):  $\text{M}^+ = 385$  (2 Cl). HRMS (TOF MS EI):  $m/z$  calcd. for  $[\text{C}_{16}\text{H}_{13}\text{Cl}_2\text{NO}_4\text{S}]^+$ : 384.9942, found: 384.9945.

**Ethyl 7-[(8-chloro-5-methyl-6,6-dioxido-5,11-dihydro[1,3]benzodioxolo[5,6-c]benzo[f][1,2]thiazepin-11-yl)amino]heptanoate (20a).** To a solution of ethyl 7-aminoheptanoate (2.77 g, 16 mmol) in  $\text{CH}_3\text{CN}$  (15 mL) crude **18** (2.60 g, 7 mmol) was added, the solution obtained in 5 min was stirred at room temperature for 1 h. It was evaporated in vacuo, the residue was dissolved in DCM (40 mL), washed with water ( $2 \times 20$  mL), dried over  $\text{Na}_2\text{SO}_4$ , and evaporated in vacuo. The oily residue (4.3 g) was purified by dry-column chromatography on a short silica gel column (thickness of stationary phase: 30 mm, eluent: heptane/DCM 1:1, DCM, DCM/MeOH 100:1, 100:2, 100:4). After evaporation of solvents in vacuo **20a** (2.97 g, 83%) was obtained as a pale yellow oil. IR (film): 2932, 1731, 1487, 1328, 1153, 1037  $\text{cm}^{-1}$ .  $^1\text{H}$  NMR (500 MHz,  $\text{CDCl}_3$ ): 7.92 (d,  $^4J = 1.7$  Hz, 1H), 7.42 (m, 2H), 6.87 (s, 1H), 6.80 (s, 1H), 4.93 (s, 1H), 4.11 (q,  $^3J = 7.2$  Hz, 2H), 3.38 (s, 3H), 2.50 (t,  $^3J = 7.1$  Hz, 2H), 2.28 (t,  $^3J = 7.5$  Hz, 2H), 1.76 (br s, 1H), 1.61 (~qn,  $^3J = 7.2$  Hz, 2H), 1.50 (m, 2H), 1.32 (m, 4H), 1.24 (t,  $^3J = 7.1$  Hz, 3H).  $^{13}\text{C}$  NMR (125 MHz,  $\text{CDCl}_3$ ): 173.63, 147.88, 147.62, 140.73, 137.39, 134.44, 134.13, 131.87, 131.19, 129.90, 128.26, 108.54, 107.98, 101.96, 64.55, 60.11, 48.18, 38.13, 34.15, 29.85, 28.90, 26.88, 24.75, 14.18. MS (ESI):  $[\text{M}+\text{H}]^+$ : 509 (1 Cl). HRMS (ESI):  $m/z$  calcd. for  $\text{C}_{24}\text{H}_{30}\text{ClN}_2\text{O}_6\text{S}$   $[\text{M}+\text{H}]^+$ : 509.1508, found: 509.1505.

**7-[(8-Chloro-5-methyl-6,6-dioxido-5,11-dihydro[1,3]benzodioxolo[5,6-c]benzo[f][1,2]thiazepin-11-yl)amino]heptanoic acid (20b).** To a solution of ester **20a** (2.55 g, 5 mmol) in EtOH (30 mL), a solution of NaOH (0.240 g, 6 mmol) in water (7.5 mL) was added at room temperature and it was stirred at room temperature for 25 h. Water (15 mL) was added and the ethanol was removed by evaporation in vacuo. Water (8 mL) was added, and the solution was neutralized with an aqueous HCl solution (0.50 mL of cc. HCl dissolved in 10 mL of water, containing 6 mmol of HCl). The milky reaction mixture was stirred at room temperature for 3 days, the solid product obtained was filtered, washed with water ( $2 \times 3$  mL), air-dried and subjected to dry-column chromatography on a short silica gel column (thickness of stationary phase: 25 mm, eluent: DCM, DCM/MeOH 100:2, 100:4). After evaporation of solvents the solid residue was triturated with  $\text{CH}_3\text{CN}$  (5 mL) to afford **20b** (1.92 g, 80%) as colorless crystals. M. p. 126–128  $^\circ\text{C}$  ( $\text{CH}_3\text{CN}$ ). IR (KBr): 3081, 1712, 1493, 1326, 1224, 1034  $\text{cm}^{-1}$ .  $^1\text{H}$  NMR (500 MHz,  $\text{DMSO}-d_6$ ): 7.75 (d,  $^4J = 1.8$  Hz, 1H), 7.68 (dd,  $^4J = 2.2$  Hz,  $^3J =$



8.5 Hz, 1H), 7.65 (d,  $^3J = 8.6$  Hz, 1H), 7.15 (s, 1H), 7.04 (s, 1H), 6.08 (d,  $^4J = 0.7$  Hz, 1H), 6.06 (d,  $^4J = 0.6$  Hz, 1H), 5.11 (s, 1H), 3.37 (s, 3H), 2.44 (m, 2H), 2.18 (t,  $^3J = 7.3$  Hz, 2H), 1.47 (m, 4H), 1.26 (m, 4H).  $^{13}\text{C}$  NMR (125 MHz, DMSO- $d_6$ ): 174.68, 147.41, 147.38, 141.30, 138.55, 135.93, 132.77, 131.96, 130.82, 126.86, 109.08, 107.38, 102.18, 61.99, 47.74, 37.83, 33.81, 29.47, 28.69, 26.73, 24.66. MS (ESI):  $[\text{M}+\text{H}]^+$ : 481 (1 Cl). HRMS (ESI):  $m/z$  calcd. for  $\text{C}_{22}\text{H}_{26}\text{ClN}_2\text{O}_6\text{S}$   $[\text{M}+\text{H}]^+$ : 481.1195, found: 481.1201.

**8-Chloro-*N*,5-dimethyl-5,11-dihydro[1,3]benzodioxolo[5,6-*c*]benzo[*f*][1,2]thiazepin-11-amine 6,6-dioxide (20c).** To the solution of methylamine (1.40 g, 45 mmol) in dioxane (45 mL) crude **18** (3.35 g, 9 mmol) was added, and the suspension obtained was stirred at room temperature for 1 h. Water (150 mL) was added dropwise, the product precipitated was filtered, washed with water ( $2 \times 10$  mL), air-dried and purified by dry-column chromatography on a short silica gel column (thickness of stationary phase: 30 mm, eluent: heptane/DCM 1:1, 1:2, DCM, DCM/MeOH 100:1, 100:2, 100:4). After evaporation of solvents, the solid residue was triturated with  $\text{CH}_3\text{CN}$  (15 mL) to afford **20c** (1.86 g, 56%) as colorless crystals. M. p. decomp. from 218 °C ( $\text{CH}_3\text{CN}$ ). IR (KBr): 1501, 1485, 1325, 1154, 1036  $\text{cm}^{-1}$ .  $^1\text{H}$  NMR (500 MHz,  $\text{CDCl}_3$ ): 7.93 (d,  $^4J = 2.1$  Hz, 1H), 7.43 (dd,  $^4J = 2.0$  Hz,  $^3J = 8.4$  Hz, 1H), 6.87 (s, 1H), 6.81 (s, 1H), 5.98 (d,  $^4J = 1.1$  Hz, 1H), 5.97 (d,  $^4J = 1.1$  Hz, 1H), 4.82 (s, 1H), 3.37 (s, 3H), 2.38 (s, 3H), 1.86 (br s, 1H).  $^{13}\text{C}$  NMR (125 MHz,  $\text{CDCl}_3$ ): 147.96, 147.64, 140.69, 136.96, 134.24, 133.82, 131.90, 131.34, 130.11, 128.35, 108.51, 108.23, 101.99, 66.52, 38.21, 34.98. MS (ESI):  $[\text{M}+\text{H}]^+$ : 367 (1 Cl). HRMS (ESI):  $m/z$  calcd. for  $\text{C}_{16}\text{H}_{16}\text{ClN}_2\text{O}_4\text{S}$   $[\text{M}+\text{H}]^+$ : 367.0514, found: 367.0516.

**8-Chloro-5-methyl-*N*-(2-morpholin-4-ylethyl)-5,11-dihydro[1,3]benzodioxolo[5,6-*c*]benzo[*f*][1,2]thiazepin-11-amine 6,6-dioxide (20d).** To the solution of 4-(2-aminoethyl)morpholine (1.15 g, 8.8 mmol) in  $\text{CH}_3\text{CN}$  (15 mL) crude **18** (1.49 g, 4 mmol) was added, and the suspension obtained was stirred at room temperature for 1 h. Water (50 mL) was added dropwise, the product separated was filtered, washed with water ( $3 \times 3$  mL) air-dried and purified by dry-column chromatography on a short silica gel column (thickness of stationary phase: 25 mm, eluent: DCM, DCM/MeOH 100:2). After evaporation of solvents, the solid residue was triturated with  $\text{CH}_3\text{CN}$  to afford **20d** (1.58 g, 84%) as colorless crystals. M. p. 207–209 °C ( $\text{CH}_3\text{CN}$ , decomp.). IR (KBr): 3331, 1488, 1326, 1116, 1029  $\text{cm}^{-1}$ .  $^1\text{H}$  NMR (500 MHz,  $\text{CDCl}_3$ ): 7.93 (m, 1H), 7.42 (m, 2H), 6.89 (s, 1H), 6.81 (s, 1H), 5.98 (d,  $^4J = 1.3$  Hz, 1H), 5.97 (d,  $^4J = 1.4$  Hz, 1H), 4.93 (s, 1H), 3.67 (m, 4H), 3.42 (s, 3H), 2.63 (m, 2H), 2.50 (m, 2H), 2.37 (m, 4H).  $^{13}\text{C}$  NMR (125 MHz,  $\text{CDCl}_3$ ): 147.96, 147.70, 140.84, 137.43, 134.77, 134.24, 131.82, 131.17, 129.80, 128.31, 108.51, 107.75, 102.00, 66.88 (2C), 64.38, 58.05, 53.68 (2C), 44.27,

37.97. MS (ESI):  $[M+H]^+$ : 466 (1 Cl). HRMS (ESI):  $m/z$  calcd. for  $C_{21}H_{25}ClN_3O_5S$   $[M+H]^+$ : 466.1198, found: 466.1202.

**8-Chloro-5-methyl-11-pyrrolidin-1-yl-5,11-dihydro[1,3]benzodioxolo[5,6-c]benzo[f][1,2]thiazepine 6,6-dioxide (20e).** To the cooled solution of pyrrolidine (0.71 g, 10 mmol, 0.83 mL) in  $CH_3CN$  (10 mL) crude **18** (1.49 g, 4 mmol) was added. The suspension formed was stirred at room temperature for 1 h. Water (40 mL) was added dropwise, the product separated was filtered, washed with water ( $3 \times 3$  mL), air-dried and purified by dry-column chromatography on a short silica gel column (thickness of stationary phase: 25 mm, eluent: heptane/DCM 2:1, 1:1, DCM, DCM/MeOH 100:1). After evaporation of solvents, the solid residue was triturated with  $CH_3CN$  (5 mL) to afford TLC pure **20e** (1.11 g, 68%) as colorless crystals. M. p. decomp. from 215 °C ( $CH_3CN$ ). IR (KBr): 1483, 1316, 1226, 1033  $cm^{-1}$ .  $^1H$  NMR (500 MHz,  $CDCl_3$ ): 7.92 (d,  $^4J = 2.2$  Hz, 1H), 7.36 (dd,  $^4J = 2.2$  Hz,  $^3J = 8.3$  Hz, 1H), 7.30 (d,  $^3J = 8.3$  Hz, 1H), 6.89 (s, 1H), 6.75 (s, 1H), 6.01 (d,  $^4J = 1.3$  Hz, 1H), 5.95 (d,  $^4J = 1.5$  Hz, 1H), 4.05 (br s, 1H), 3.46 (s, 3H), 2.27 (m, 2H), 2.18 (m, 2H), 1.70 (m, 4H).  $^{13}C$  NMR (125 MHz,  $CDCl_3$ ): 148.20, 147.64, 142.76, 135.75, 135.52, 134.88, 132.60, 131.18, 131.07, 128.22, 110.64, 109.34, 102.06, 75.99, 53.71 (2C), 39.58, 23.19 (2C). MS (EI):  $[M]^+$ : 406 (1 Cl). HRMS (ESI):  $m/z$  calcd. for  $C_{19}H_{20}ClN_2O_4S$   $[M+H]^+$ : 407.0827, found: 407.0831.

**9-Chloro-N,6-dimethyl-2,3,6,12-tetrahydro[1,4]benzodioxino[6,7-c]benzo[f][1,2]thiazepin-12-amine 7,7-dioxide (21c).** To the cold solution of methylamine (0.745 g, 24 mmol) in dioxane (17 mL) crude **19** (1.85 g, 4.8 mmol) was added, and the suspension obtained was stirred at room temperature for 45 min. After evaporation in vacuo the solid residue was triturated with water (15 mL), filtered, air-dried and purified by dry-column flash chromatography on a short silica gel column (thickness of stationary phase: 25 mm, eluent: DCM, DCM/MeOH 100:1). After evaporation of solvents, the solid residue was triturated with DIPE (10 mL) to afford **21c** (1.71 g, 93%) as colorless crystals. M. p. decomp. from 212 °C ( $CH_3CN$ ). IR (KBr): 1508, 1324, 1064, 594  $cm^{-1}$ .  $^1H$  NMR (500 MHz,  $CDCl_3$ ): 7.95 (d,  $^4J = 2.2$  Hz, 1H), 7.44 (dd,  $^4J = 2.2$  Hz,  $^3J = 8.2$  Hz, 1H), 7.39 (d,  $^3J = 8.3$  Hz, 1H), 6.92 (s, 1H), 6.85 (s, 1H), 4.73 (s, 1H), 4.24 (s, 4H), 3.33 (s, 3H), 2.34 (s, 3H).  $^{13}C$  NMR (125 MHz,  $CDCl_3$ ): 143.71, 143.29, 140.74, 136.68, 134.20, 132.02, 131.95, 131.28, 130.99, 128.45, 117.90, 116.92, 67.34, 64.32, 64.27, 38.75, 34.91. MS (EI):  $[M]^+$ : 380 (1 Cl). HRMS (ESI):  $m/z$  calcd. for  $C_{17}H_{18}ClN_2O_4S$   $[M+H]^+$ : 381.0670, found: 381.0677.

**9-Chloro-6-methyl-N-(2-morpholin-4-ylethyl)-2,3,6,12-tetrahydro[1,4]benzodioxino[6,7-c]benzo[f][1,2]thiazepin-12-amine 7,7-dioxide (21d).** To the solution of 4-(2-aminoethyl)morpholine (1.15 g, 8.8 mmol) in  $CH_3CN$  (15 mL) crude **19** (1.55 g, 4 mmol) was

added. The solution obtained was stirred at room temperature for 1 h. Water (50 mL) was added dropwise in 30 min, the product separated was filtered, washed with water ( $2 \times 5$  mL), air-dried and purified by dry-column chromatography on a short silica gel column (thickness of stationary phase: 30 mm, eluent: DCM, DCM/MeOH 100:2). After evaporation of solvents, the solid residue was triturated with CH<sub>3</sub>CN (10 mL), filtered and recrystallized from CH<sub>3</sub>CN (85 mL) to afford **21d** (1.46 g, 75%) as colorless crystals. M. p. decomp. from 217 °C (CH<sub>3</sub>CN). IR (KBr): 1509, 1323, 1147, 1065 cm<sup>-1</sup>. <sup>1</sup>H NMR (500 MHz, CDCl<sub>3</sub>): 7.94 (d, <sup>4</sup>J = 2.1 Hz, 1H), 7.43 (dd, <sup>4</sup>J = 2.1 Hz, <sup>3</sup>J = 8.3 Hz, 1H), 7.39 (d, <sup>3</sup>J = 8.3 Hz, 1H), 6.94 (s, 1H), 6.85 (s, 1H), 4.85 (s, 1H), 4.23 (s, 4H), 3.67 (m, 4H), 3.39 (s, 3H), 2.58 (m, 2H), 2.47 (m, 2H), 2.46 (br s, 1H), 2.35 (m, 4H). <sup>13</sup>C NMR (125 MHz, CDCl<sub>3</sub>): 143.65, 143.33, 140.95, 137.18, 134.12, 133.06, 131.82, 130.97, 130.54, 128.30, 117.20, 116.96, 66.85 (2C), 64.96, 64.29, 64.20, 58.04, 53.63 (2C), 44.17, 38.41. MS (EI): [M]<sup>+</sup>: 479 (1 Cl). HRMS (ESI): m/z calcd. for C<sub>22</sub>H<sub>27</sub>ClN<sub>3</sub>O<sub>5</sub>S [M+H]<sup>+</sup>: 480.1354, found: 480.1353.

**9-Chloro-6-methyl-N-(3-morpholin-4-ylpropyl)-2,3,6,12-tetrahydro[1,4]benzodioxino[6,7-c]benzo[f][1,2]thiazepin-12-amine 7,7-dioxide (21e).** To the solution of 4-(3-aminopropyl)morpholine (1.27 g, 8.8 mmol) in CH<sub>3</sub>CN (15 mL) crude **19** (1.55 g, 4 mmol) was added. The solution obtained was stirred at room temperature for 1.5 h. Water (100 mL) was added dropwise, the oily product separated was extracted with DCM ( $2 \times 25$  mL), the combined organic phases were washed with water (20 mL), dried over Na<sub>2</sub>SO<sub>4</sub>, and partly evaporated in vacuo (to a volume of 20 mL). The solution obtained was purified by dry-column chromatography on a short silica gel column (thickness of stationary phase: 30 mm, eluent: DCM, DCM/MeOH 100:2, 100:4). After evaporation of solvents, the oily residue was triturated with water (30 mL), filtered and recrystallized from CH<sub>3</sub>CN to afford **21e** (1.29 g, 65%) as bright colorless crystals. M. p. 164–166 °C (CH<sub>3</sub>CN). IR (KBr): 1500, 1304, 1146, 1116, 1069 cm<sup>-1</sup>. <sup>1</sup>H NMR (500 MHz, CDCl<sub>3</sub>): 7.93 (d, <sup>4</sup>J = 0.7 Hz, 1H), 7.43 (m, 2H), 6.93 (s, 1H), 6.85 (s, 1H), 4.92 (s, 1H), 4.23 (s, 4H), 3.66 (m, 4H), 3.35 (s, 3H), 2.57 (m, 2H), 2.42 (m, 4H), 2.40 (t, <sup>3</sup>J = 7.0 Hz, 2H), 2.35 (br s, 1H), 1.69 (m, 2H). <sup>13</sup>C NMR (125 MHz, CDCl<sub>3</sub>): 143.55, 143.35, 140.68, 137.45, 134.00, 133.13, 131.87, 130.97, 130.04, 128.36, 116.97, 116.93, 66.89 (2C), 64.32, 64.30, 64.21, 57.31, 53.74 (2C), 46.90, 38.39, 26.37. MS (ESI): [M+H]<sup>+</sup>: 494 (1 Cl). HRMS (ESI): m/z calcd. for C<sub>23</sub>H<sub>29</sub>ClN<sub>3</sub>O<sub>5</sub>S [M+H]<sup>+</sup>: 494.1511, found: 494.1513.

**9-Chloro-6-methyl-N-(4-morpholin-4-ylbutyl)-2,3,6,12-tetrahydro[1,4]benzodioxino[6,7-c]benzo[f][1,2]thiazepin-12-amine 7,7-dioxide (21f).** To the solution of 4-(4-aminobutyl)morpholine (1.39 g, 8.8 mmol) in CH<sub>3</sub>CN (15 mL) crude **19** (1.55 g, 4 mmol) was added. The solution obtained was stirred at room temperature for 1 h. Water (60 mL) was added

dropwise in 30 min, the oily product separated was extracted with DCM (3 × 25 mL), the combined organic phases were washed with water (25 mL), dried over Na<sub>2</sub>SO<sub>4</sub>, and evaporated in vacuo. The residue was purified by dry-column chromatography on a short silica gel column (thickness of stationary phase: 30 mm, eluent: heptane/DCM 1:1, 1:2, DCM, DCM/MeOH 100:2, 100:4). After evaporation of solvents, the foamy residue was dissolved in CH<sub>3</sub>CN (20 mL), the opalescent solution was treated with charcoal, the clear solution obtained was evaporated in vacuo to afford **21f** (1.43 g, 70%) as colorless foam. IR (KBr): 3332, 2936, 1507, 1321, 1116, 1066 cm<sup>-1</sup>. <sup>1</sup>H NMR (500 MHz, CDCl<sub>3</sub>): 7.93 (d, <sup>4</sup>J = 2.0 Hz, 1H), 7.42 (dd, <sup>4</sup>J = 2.1 Hz, <sup>3</sup>J = 8.3 Hz, 1H), 7.39 (d, <sup>3</sup>J = 8.3 Hz, 1H), 6.91 (s, 1H), 6.84 (s, 1H), 4.86 (s, 1H), 4.22 (s, 4H), 3.68 (m, 4H), 3.34 (s, 3H), 2.49 (~q, <sup>3</sup>J = 3.8 Hz, 2H), 2.39 (m, 4H), 2.29 (t, <sup>3</sup>J = 6.8 Hz, 2H), 1.94 (br s, 1H), 1.50 (m, 4H). <sup>13</sup>C NMR (125 MHz, CDCl<sub>3</sub>): 143.56, 143.21, 140.71, 137.06, 133.99, 132.52, 131.84, 131.04, 130.65, 128.27, 117.50, 116.88, 66.83 (2C), 65.14, 64.22, 64.15, 58.65, 53.61 (2C), 47.89, 38.62, 27.84, 24.18. MS (ESI): [M+H]<sup>+</sup>: 508 (1 Cl). HRMS (ESI): m/z calcd. for C<sub>24</sub>H<sub>31</sub>ClN<sub>3</sub>O<sub>5</sub>S [M+H]<sup>+</sup>: 508.1667, found: 508.1669.

**9-Chloro-6-methyl-12-pyrrolidin-1-yl-2,3,6,12-tetrahydro[1,4]benzodioxino[6,7-c]benzo[f][1,2]thiazepine 7,7-dioxide (21g)**. To the cooled suspension of crude **19** (1.74 g, 4.5 mmol) in CH<sub>3</sub>CN (15 mL) pyrrolidine (0.80 g, 11.3 mmol, 0.94 mL) was added in one portion. An exothermic reaction took place, a solution was formed, which was followed by rapid precipitation. The suspension obtained was stirred at room temperature for 1 h. Water (60 mL) was added dropwise, the product separated was filtered, washed with water (3 × 3 mL), and air-dried. It was purified by dry-column chromatography on a short silica gel column (thickness of stationary phase: 30 mm, eluent: DCM). After evaporation of solvent, the solid residue triturated with Et<sub>2</sub>O (5 mL) to give **21g** (1.30 g, 69%) as colorless crystals. M. p. decomp. from 216 °C (CH<sub>3</sub>CN). IR (KBr): 2933, 1586, 1506, 1320, 1138, 1067 cm<sup>-1</sup>. <sup>1</sup>H NMR (500 MHz, CDCl<sub>3</sub>): 7.93 (d, <sup>4</sup>J = 2.1 Hz, 1H), 7.36 (dd, <sup>4</sup>J = 2.2 Hz, <sup>3</sup>J = 8.3 Hz, 1H), 7.29 (d, <sup>3</sup>J = 8.3 Hz, 1H), 6.97 (s, 1H), 6.79 (s, 1H), 4.23 (m, 4H), 4.03 (s, 1H), 3.47 (s, 3H), 2.25 (m, 2H), 2.17 (m, 2H), 1.68 (m, 4H). <sup>13</sup>C NMR (125 MHz, CDCl<sub>3</sub>): 143.84, 143.44, 143.09, 135.79, 134.80, 134.64, 132.72, 131.02, 130.65, 128.33, 119.37, 118.26, 75.64, 64.32, 64.17, 53.68 (2C), 39.93, 23.19 (2C). MS (EI): [M]<sup>+</sup>: 420 (1 Cl). HRMS (ESI): m/z calcd. for C<sub>20</sub>H<sub>22</sub>ClN<sub>2</sub>O<sub>4</sub>S [M+H]<sup>+</sup>: 421.0983, found: 421.0985.

**9-Chloro-6-methyl-2,3,6,12-tetrahydro[1,4]benzodioxino[6,7-c]benzo[f][1,2]thiazepin-12-amine 7,7-dioxide (21h)**. To a cold, 1 m/m % ammonia solution in dioxane (204 g, containing 2.04 g, 120 mmol NH<sub>3</sub>) crude **19** (4.63 g, 12 mmol) was added, the thin suspension was stirred at room temperature for 2 h, then evaporated in vacuo. The solid residue (7.1 g) was triturated

with water (20 mL), filtered, washed with water (2 × 10 mL), dried in vacuo and purified by dry-column chromatography on a short silica gel column (thickness of stationary phase: 30 mm, eluent: heptane/DCM 1:1, 1:2, DCM, DCM/MeOH 100:1). After evaporation of solvents, the foamy residue was triturated with DIPE (20 mL), filtered, washed with DIPE (5 mL) to afford **21h** (2.10 g, 48%) as colorless crystals. M. p. decomp. from 200 °C (EtOH/CH<sub>3</sub>CN). IR (KBr): 3368, 1503, 1322, 1143, 1062 cm<sup>-1</sup>. <sup>1</sup>H NMR (500 MHz, DMSO-*d*<sub>6</sub>): 7.79 (d, <sup>3</sup>*J* = 8.5 Hz, 1H), 7.73 (d, <sup>4</sup>*J* = 2.3 Hz, 1H), 7.69 (dd, <sup>4</sup>*J* = 2.3 Hz, <sup>3</sup>*J* = 8.6 Hz, 1H), 7.05 (s, 1H), 7.03 (s, 1H), 5.47 (s, 1H), 4.23 (s, 4H), 3.32 (s, 3H), 2.57 (br s, 2H). <sup>13</sup>C NMR (125 MHz, DMSO-*d*<sub>6</sub>): 143.41, 142.90, 140.85, 140.61, 137.22, 132.27, 132.11, 129.57, 129.34, 126.73, 116.56, 115.04, 64.32, 64.22, 53.17, 37.59. MS (EI): [M]<sup>+</sup>: 366 (1 Cl). HRMS (ESI): *m/z* calcd. for C<sub>16</sub>H<sub>16</sub>ClN<sub>2</sub>O<sub>4</sub>S [M+H]<sup>+</sup>: 367.0514, found: 367.0519.

**7-[(9-Chloro-6-methyl-7,7-dioxido-2,3,6,12-tetrahydro[1,4]benzodioxino[6,7-c]benzo[f][1,2]thiazepin-12-yl)amino]-*N,N*-dimethylheptanamide (21i)**. To a solution of 7-amino-*N,N*-dimethylheptanamide (1.45 g, 8.4 mmol) in CH<sub>3</sub>CN (20 mL) crude **19** (1.545 g, 4 mmol) was added and the solution obtained was stirred at room temperature for 3.5 h. It was evaporated in vacuo, the residue was dissolved in DCM (50 mL), washed with water (3 × 20 mL), dried over Na<sub>2</sub>SO<sub>4</sub>, and evaporated in vacuo. The oily residue was purified by dry-column chromatography on a short silica gel column (thickness of stationary phase: 40 mm, eluent: DCM, DCM/MeOH 100:1, 100:2). After evaporation of solvents in vacuo **21i** (1.47 g, 70%) was obtained as a colorless foam. IR (KBr): 3446, 2929, 1641, 1507, 1320, 1143, 1066 cm<sup>-1</sup>. <sup>1</sup>H NMR (500 MHz, CDCl<sub>3</sub>): 7.92 (d, <sup>4</sup>*J* = 2.0 Hz, 1H), 7.43 (dd, <sup>4</sup>*J* = 2.0 Hz, <sup>3</sup>*J* = 8.2 Hz, 1H), 7.40 (d, <sup>3</sup>*J* = 8.4 Hz, 1H), 6.91 (s, 1H), 6.83 (s, 1H), 4.85 (s, 1H), 4.23 (s, 4H), 3.35 (s, 3H), 2.98 (s, 3H), 2.93 (s, 3H), 2.47 (m, 2H), 2.28 (t, <sup>3</sup>*J* = 7.5 Hz, 2H), 1.87 (br s, 1H), 1.61 (m, 2H), 1.48 (m, 2H), 1.32 (m, 4H). <sup>13</sup>C NMR (125 MHz, CDCl<sub>3</sub>): 172.92, 143.59, 143.27, 140.85, 137.20, 134.01, 132.77, 131.87, 131.08, 130.71, 128.27, 117.51, 116.98, 65.25, 64.26, 64.19, 48.06, 38.63, 37.16, 35.25, 33.13, 29.85, 29.23, 27.04, 24.94. MS (ESI): [M+H]<sup>+</sup>: 522 (1 Cl). HRMS (ESI): *m/z* calcd. for C<sub>25</sub>H<sub>33</sub>ClN<sub>3</sub>O<sub>5</sub>S [M+H]<sup>+</sup>: 522.1824, found: 522.1829.

**9-Chloro-6-methyl-*N*-(2-pyrrolidin-1-ylethyl)-2,3,6,12-tetrahydro[1,4]benzodioxino[6,7-c]benzo[f][1,2]thiazepin-12-amine 7,7-dioxide (21j)**. To the solution of 4-(2-aminoethyl)pyrrolidine (1.01 g, 8.8 mmol) in CH<sub>3</sub>CN (15 mL) crude **19** (1.55 g, 4 mmol) was added. The solution obtained was stirred at room temperature for 1 h. Water (60 mL) was added, the oily product separated was extracted with DCM (30 + 15 mL), the combined organic phases were washed with water (15 mL), dried over Na<sub>2</sub>SO<sub>4</sub>, and evaporated in vacuo. The oily residue was purified by dry-column chromatography on a short silica gel column (thickness of

stationary phase: 25 mm, eluent: DCM, DCM/MeOH 100:1, 100:2, 100:4). After evaporation of solvents, the solid residue was recrystallized from CH<sub>3</sub>CN (50 mL) to afford **21j** (1.35 g, 72%) as colorless crystals. M. p. decomp. from 190 °C (CH<sub>3</sub>CN). IR (KBr): 3281, 2788, 1509, 1325, 1159, 1061 cm<sup>-1</sup>. <sup>1</sup>H NMR (500 MHz, CDCl<sub>3</sub>): 7.93 (br s, 1H), 7.41 (m, 2H), 6.94 (s, 1H), 6.85 (s, 1H), 4.86 (s, 1H), 4.22 (s, 4H), 3.40 (s, 3H), 2.59 (m, 4H), 2.41 (m, 4H), 2.35 (br s, 1H), 1.73 (m, 4H). <sup>13</sup>C NMR (125 MHz, CDCl<sub>3</sub>): 143.59, 143.31, 141.14, 137.29, 134.04, 133.32, 131.80, 130.89, 130.69, 128.14, 117.31, 117.03, 65.12, 64.27, 64.18, 55.56, 54.08 (2C), 46.73, 38.32, 23.39 (2C). MS (ESI): [M+H]<sup>+</sup>: 464 (1 Cl). HRMS (ESI): m/z calcd. for C<sub>22</sub>H<sub>27</sub>ClN<sub>3</sub>O<sub>4</sub>S [M+H]<sup>+</sup>: 464.1405, found: 464.1407.

**9-Chloro-6-methyl-N-(2-piperidin-1-ylethyl)-2,3,6,12-tetrahydro[1,4]benzodioxino[6,7-c]benzo[f][1,2]thiazepin-12-amine 7,7-dioxide (21k).** To the solution of 4-(2-aminoethyl)piperidine (1.13 g, 8.8 mmol) in CH<sub>3</sub>CN (15 mL) crude **19** (1.55 g, 4 mmol) was added. The thin suspension obtained was stirred at room temperature for 1 h. Water (60 mL) was added dropwise in 30 min, the oily product separated was extracted with DCM (30 + 15 mL), the combined organic phases were washed with water (15 mL), dried over Na<sub>2</sub>SO<sub>4</sub>, and evaporated in vacuo. The oily residue was purified by dry-column chromatography on a short silica gel column (thickness of stationary phase: 25 mm, eluent: DCM, DCM/MeOH 100:1, 100:2). After evaporation of solvents, the foamy residue was dissolved in CH<sub>3</sub>CN (5 mL), crystallization occurred when cooling it at 5 °C for 3 days to afford **21k** (1.455 g, 76%) as colorless crystals. M. p. decomp. from 141 °C (CH<sub>3</sub>CN). IR (KBr): 3302, 2937, 1508, 1323, 1148, 1065 cm<sup>-1</sup>. <sup>1</sup>H NMR (500 MHz, CDCl<sub>3</sub>): 7.93 (m, 1H), 7.41 (m, 2H), 6.94 (s, 1H), 6.84 (s, 1H), 4.86 (d, <sup>3</sup>J = 3.8 Hz, 1H), 4.22 (s, 4H), 3.42 (s, 3H), 2.58 (~q, <sup>3</sup>J = 5.0 Hz, 2H), 2.41 (t, <sup>3</sup>J = 6.0 Hz, 2H), 2.37 (~bq, <sup>3</sup>J = 5.5 Hz, 1H), 2.28 (br s, 4H), 1.52 (~qn, <sup>3</sup>J = 5.6 Hz, 4H), 1.40 (m, 2H). <sup>13</sup>C NMR (125 MHz, CDCl<sub>3</sub>): 143.58, 143.37, 141.14, 137.38, 134.04, 133.54, 131.76, 130.88, 130.48, 128.20, 117.13, 117.08, 64.85, 64.28, 64.19, 58.34, 54.70 (2C), 44.86, 38.41, 25.95 (2C), 24.35. MS (ESI): [M+H]<sup>+</sup>: 478 (1 Cl). HRMS (ESI): m/z calcd. for C<sub>23</sub>H<sub>29</sub>ClN<sub>3</sub>O<sub>4</sub>S [M+H]<sup>+</sup>: 478.1562, found: 478.1564.

**N'-(9-Chloro-6-methyl-7,7-dioxido-2,3,6,12-tetrahydro[1,4]benzodioxino[6,7-c]benzo[f][1,2]thiazepin-12-yl)-N,N-dimethylethane-1,2-diamine (21l).** To the solution of 2-(dimethylamino)ethylamine (0.88 g, 10 mmol) in CH<sub>3</sub>CN (15 mL) crude **19** (1.70 g, 4.4 mmol) was added. The thick suspension obtained was stirred at room temperature for 1 h. Water (60 mL) was added dropwise, the separated product was filtered, washed with water (2 × 5 mL). The wet crude product was dissolved in DCM (35 mL), water was separated, the organic phase was dried over Na<sub>2</sub>SO<sub>4</sub> and evaporated in vacuo. The residue was purified by dry-column

chromatography on a short silica gel column (thickness of stationary phase: 25 mm, eluent: DCM, DCM/MeOH 100:2, 100:4). After evaporation of solvents, the solid residue was crystallized from CH<sub>3</sub>CN (30 mL) to afford **21l** (1.54 g, 80%) as colorless crystals. M. p. decomp. from 190 °C (CH<sub>3</sub>CN). IR (KBr): 2944, 1509, 1325, 1147, 1060 cm<sup>-1</sup>. <sup>1</sup>H NMR (500 MHz, CDCl<sub>3</sub>): 7.92 (br s, 1H), 7.42 (m, 2H), 6.94 (s, 1H), 6.85 (s, 1H), 4.88 (s, 1H), 4.22 (s, 4H), 3.41 (s, 3H), 2.56 (t, <sup>3</sup>J = 5.7 Hz, 2H), 2.39 (t, <sup>3</sup>J = 5.6 Hz, 2H), 2.31 (br s, 1H), 2.15 (s, 6H). <sup>13</sup>C NMR (125 MHz, CDCl<sub>3</sub>): 143.57, 143.32, 141.14, 137.34, 134.02, 133.46, 131.81, 130.84, 130.49, 128.12, 117.14, 117.08, 64.86, 64.26, 64.17, 58.80, 45.52, 45.41 (2C), 38.28. MS (ESI): [M+H]<sup>+</sup>: 438 (1 Cl). HRMS (ESI): m/z calcd. for C<sub>20</sub>H<sub>25</sub>ClN<sub>3</sub>O<sub>4</sub>S [M+H]<sup>+</sup>: 438.1249, found: 438.1253.

**N'-(9-Chloro-6-methyl-7,7-dioxido-2,3,6,12-tetrahydro[1,4]benzodioxino[6,7-c]benzo[f][1,2]thiazepin-12-yl)-N,N-dimethylpropane-1,3-diamine (21m).** To the solution of 3-(dimethylamino)-1-propylamine (0.90 g, 8.8 mmol) in CH<sub>3</sub>CN (15 mL) crude **19** (1.55 g, 4 mmol) was added. The solution obtained was stirred at room temperature for 1 h. Water (60 mL) was added dropwise, the oily product separated was extracted with DCM (30 + 15 mL), the combined organic phases were washed with water (15 mL), dried over Na<sub>2</sub>SO<sub>4</sub>, and evaporated in vacuo. The oily residue was purified by dry-column chromatography on a short silica gel column (thickness of stationary phase: 25 mm, eluent: DCM, DCM/MeOH 100:2, 100:4). After evaporation of solvents, the foamy residue was dissolved in CH<sub>3</sub>CN (5 mL), crystallization occurred when cooling it at 5 °C overnight to afford **21m** (1.355 g, 75%) as colorless crystals. M. p. 154–156 °C (CH<sub>3</sub>CN). IR (KBr): 3199, 1508, 1319, 1066 cm<sup>-1</sup>. <sup>1</sup>H NMR (500 MHz, CDCl<sub>3</sub>): 7.92 (br s, 1H), 7.42 (m, 2H), 6.92 (s, 1H), 6.84 (s, 1H), 4.90 (s, 1H), 4.22 (s, 4H), 3.36 (s, 3H), 2.56 (m, 2H), 2.30 (t, <sup>3</sup>J = 7.0 Hz, 2H), 2.22 (br s, 1H), 2.20 (s, 6H), 1.66 (m, 2H). <sup>13</sup>C NMR (125 MHz, CDCl<sub>3</sub>): 143.52, 143.33, 140.76, 137.41, 133.94, 133.18, 131.86, 130.90, 130.22, 128.26, 117.08, 116.92, 64.53, 64.26, 64.17, 58.04, 46.86, 45.49 (2C), 38.36, 27.81. MS (ESI): [M+H]<sup>+</sup>: 452 (1 Cl). HRMS (ESI): m/z calcd. for C<sub>21</sub>H<sub>27</sub>ClN<sub>3</sub>O<sub>4</sub>S [M+H]<sup>+</sup>: 452.1405, found: 452.1406.

**Ethyl 1-(9-chloro-6-methyl-7,7-dioxido-2,3,6,12-tetrahydro[1,4]benzodioxino[6,7-c]benzo[f][1,2]thiazepin-12-yl)piperidine-4-carboxylate (21n).** To the solution of ethyl piperidine-4-carboxylate (1.04 g, 6.6 mmol) in CH<sub>3</sub>CN (10 mL) crude **19** (1.16 g, 3 mmol) was added. The thick suspension obtained was diluted with CH<sub>3</sub>CN (5 mL) and stirred at room temperature for 1 h. Water (70 mL) was added dropwise, the product separated was filtered, washed with water (2 × 5 mL), air-dried and purified by dry-column chromatography on a short silica gel column (thickness of stationary phase: 25 mm, eluent: DCM, DCM/MeOH 100:1,

100:2). After evaporation of solvents, the solid residue was recrystallized from CH<sub>3</sub>CN to afford **21n** (1.175 g, 77%) as colorless crystals. M. p. 229–231 °C (CH<sub>3</sub>CN). IR (KBr): 2949, 1730, 1508, 1318, 1141, 1068 cm<sup>-1</sup>. <sup>1</sup>H NMR (500 MHz, CDCl<sub>3</sub>): 7.94 (d, <sup>4</sup>J = 2.2 Hz, 1H), 7.35 (dd, <sup>4</sup>J = 2.3 Hz, <sup>3</sup>J = 8.3 Hz, 1H), 7.22 (d, <sup>3</sup>J = 8.3 Hz, 1H), 6.98 (s, 1H), 6.74 (s, 1H), 4.24 (m, 2H), 4.21 (m, 2H), 4.11 (q, <sup>3</sup>J = 7.1 Hz, 2H), 3.95 (s, 1H), 3.49 (s, 3H), 2.64 (m, 1H), 2.47 (m, 1H), 2.26 (m, 1H), 1.88 (m, 2H), 1.81 (m, 2H), 1.64 (m, 2H), 1.23 (t, <sup>3</sup>J = 7.1 Hz, 3H). <sup>13</sup>C NMR (125 MHz, CDCl<sub>3</sub>): 174.79, 144.00, 143.47, 143.16, 135.09, 134.41, 133.61, 133.47, 131.02, 130.29, 128.73, 119.65, 119.00, 76.70, 64.29, 64.15, 60.35, 52.23, 52.01, 40.73, 40.41, 28.35, 27.94, 14.15. MS (ESI): [M+H]<sup>+</sup>: 507 (1 Cl). HRMS (ESI): m/z calcd. for C<sub>24</sub>H<sub>28</sub>ClN<sub>2</sub>O<sub>6</sub>S [M+H]<sup>+</sup>: 507.1351, found: 507.1350.

**1-(9-Chloro-6-methyl-7,7-dioxido-2,3,6,12-tetrahydro[1,4]benzodioxino[6,7-c]benzo[f][1,2]thiazepin-12-yl)piperidine-4-carboxamide (21o)**. To the solution of piperidine-4-carboxamide (isonipecotamide, 1.41 g, 11 mmol) in CH<sub>3</sub>CN (175 mL) crude **19** (1.93 g, 5 mmol) was added and the suspension obtained was stirred at room temperature for 1.5 h. Water (350 mL) was added dropwise in 30 min, the product separated was filtered, washed with water (2 × 15 mL), air-dried and purified by dry-column chromatography on a short silica gel column (thickness of stationary phase: 25 mm, eluent: DCM, DCM/MeOH 100:3). After evaporation of solvents, the TLC pure solid residue was triturated with CH<sub>3</sub>CN (15 mL) to afford **21o** (2.02 g, 84%) as colorless crystals. M. p. 272–275 °C (CH<sub>3</sub>CN, decomp.) IR (KBr): 3437, 3159, 2944, 1685, 1506, 1319, 1065 cm<sup>-1</sup>. <sup>1</sup>H NMR (500 MHz, DMSO-*d*<sub>6</sub>): 7.77 (d, <sup>4</sup>J = 2.3 Hz, 1H), 7.64 (dd, <sup>4</sup>J = 2.2 Hz, <sup>3</sup>J = 8.3 Hz, 1H), 7.53 (d, <sup>3</sup>J = 8.6 Hz, 1H), 7.21 (br s, 1H), 7.03 (s, 1H), 6.96 (s, 1H), 6.73 (br s, 1H), 4.25 (m, 4H), 4.24 (s, 1H), 3.43 (s, 3H), 2.54 (m, 1H), 2.31 (m, 1H), 2.04 (m, 1H), 1.83 (m, 2H), 1.61 (m, 2H), 1.44 (m, 2H). <sup>13</sup>C NMR (125 MHz, DMSO-*d*<sub>6</sub>): 176.54, 143.76, 143.39, 143.37, 135.12, 134.99, 133.86, 133.66, 131.43, 129.97, 127.42, 119.42, 119.16, 74.61, 64.29, 64.23, 52.08, 51.78, 41.58, 40.28, 28.80, 28.33. MS (ESI): [M+H]<sup>+</sup>: 478 (1 Cl). HRMS (ESI): m/z calcd. for C<sub>22</sub>H<sub>25</sub>ClN<sub>3</sub>O<sub>5</sub>S [M+H]<sup>+</sup>: 478.1198, found: 478.1199.

**1-(9-Chloro-6-methyl-7,7-dioxido-2,3,6,12-tetrahydro[1,4]benzodioxino[6,7-c]benzo[f][1,2]thiazepin-12-yl)piperidine-4-carbonitrile (21p)**. To the solution of piperidine-4-carbonitrile (4-cyanopiperidine) (0.99 g, 9.0 mmol) in CH<sub>3</sub>CN (15 mL) crude **19** (1.55 g, 4 mmol) was added. The suspension obtained was stirred at room temperature for 2.5 h. Water (70 mL) was added dropwise, the product separated was filtered, washed with water (2 × 5 mL), air-dried and purified by dry-column chromatography on a short silica gel column (thickness of stationary phase: 30 mm, eluent: DCM, DCM/MeOH 100:1, 100:2). After



evaporation of solvents, the residue was triturated with CH<sub>3</sub>CN, filtered and dried in vacuo (0.1 mm Hg, at 90 °C for 24 h) to afford **21p** (1.60 g, 87%) as colorless crystals. M. p. 229–232 °C (CH<sub>3</sub>CN, decomp.). IR (KBr): 2928, 2240, 1508, 1320, 1143, 1067 cm<sup>-1</sup>. <sup>1</sup>H NMR (500 MHz, CDCl<sub>3</sub>): 7.94 (d, <sup>4</sup>J = 2.2 Hz, 1H), 7.37 (dd, <sup>4</sup>J = 2.2 Hz, <sup>3</sup>J = 8.3 Hz, 1H), 7.24 (d, <sup>3</sup>J = 8.3 Hz, 1H), 6.98 (s, 1H), 6.75 (s, 1H), 4.22 (m, 4H), 4.01 (s, 1H), 3.46 (s, 3H), 2.65 (m, 1H), 2.47 (m, 1H), 2.37 (m, 1H), 2.24 (m, 1H), 2.13 (m, 1H), 1.80 (m, 4H). <sup>13</sup>C NMR (125 MHz, CDCl<sub>3</sub>): 144.15, 143.54, 143.08, 135.29, 133.81, 133.51, 132.87, 131.17, 130.13, 128.73, 121.29, 119.51, 119.06, 76.34, 64.25, 64.12, 50.30 (br), 40.10, 28.61, 25.81. MS (ESI): [M+H]<sup>+</sup>: 460 (1 Cl). HRMS (ESI): m/z calcd. for C<sub>22</sub>H<sub>23</sub>ClN<sub>3</sub>O<sub>4</sub>S [M+H]<sup>+</sup>: 460.1092, found: 460.1096.

**9-Chloro-12-methoxy-6-methyl-2,3,6,12-tetrahydro[1,4]benzodioxino[6,7-c]benzo[f][1,2]thiazepine 7,7-dioxide (23a)**. The suspension of crude **19** (1.74 g, 4.5 mmol) in MeOH (15 mL) was stirred at room temperature for 2 h, while it was transformed to the suspension of the product. It was filtered, washed with MeOH (2 × 2 mL) and subjected to dry-column chromatography on a short silica gel column (thickness of stationary phase: 25 mm, eluent: heptane/DCM 1:1, DCM). After evaporation of solvents, the solid residue was triturated with MeOH to afford **23a** (1.45 g, 84%) as colorless crystals. M. p. 218–220 °C (CH<sub>3</sub>CN). IR (KBr): 1507, 1322, 1068, 596 cm<sup>-1</sup>. <sup>1</sup>H NMR (500 MHz, CDCl<sub>3</sub>): 7.91 (d, <sup>4</sup>J = 2.1 Hz, 1H), 7.58 (d, <sup>3</sup>J = 8.4 Hz, 1H), 7.44 (dd, <sup>4</sup>J = 2.2 Hz, <sup>3</sup>J = 8.5 Hz, 1H), 6.99 (s, 1H), 6.91 (s, 1H), 5.49 (s, 1H), 4.23 (m, 4H), 3.46 (s, 3H), 3.40 (m, 3H). <sup>13</sup>C NMR (125 MHz, CDCl<sub>3</sub>): 143.93, 143.73, 140.42, 135.84, 134.57, 132.88, 131.87, 129.87, 128.53, 128.00, 117.53, 115.36, 80.51, 64.31, 64.19, 57.85, 38.00. MS (EI): M<sup>+</sup> = 381 (1 Cl). HRMS (ESI): m/z calcd. for C<sub>17</sub>H<sub>16</sub>ClN<sub>2</sub>NaO<sub>5</sub>S [M+Na]<sup>+</sup>: 404.0330, found: 404.0331.

**2-[(9-Chloro-6-methyl-7,7-dioxido-2,3,6,12-tetrahydro[1,4]benzodioxino[6,7-c]benzo[f][1,2]thiazepin-12-yl)oxy]-N,N-dimethylethanamine (23b)**. To the solution of 2-(dimethylamino)ethanol (0.89 g, 10 mmol) in CH<sub>3</sub>CN (15 mL) crude **19** (1.70 g, 4.4 mmol) was added, and the solution obtained was stirred at room temperature for 3 h. Water (60 mL) was added dropwise, the precipitate was collected by filtration, washed with water (2 × 3 mL), air-dried and purified by dry-column chromatography on a short aluminum oxide column (thickness of stationary phase: 30 mm, eluent: heptane/DCM 1:1, 1:2, DCM, DCM/MeOH 100:1, 100:2). After evaporation of solvents, the solid residue was recrystallized from CH<sub>3</sub>CN (14 mL) to afford **23b** (1.14 g, 59%) as colorless crystals. M. p. 175–178 °C (decomp.). IR (KBr): 1508, 1323, 1147, 1060 cm<sup>-1</sup>. <sup>1</sup>H NMR (500 MHz, CDCl<sub>3</sub>): 7.89 (d, <sup>4</sup>J = 2.2 Hz, 1H), 7.63 (d, <sup>3</sup>J = 8.4 Hz, 1H), 7.43 (dd, <sup>4</sup>J = 2.2 Hz, <sup>3</sup>J = 8.4 Hz, 1H), 6.98 (s, 1H), 6.94 (s, 1H), 4.23 (m, 4H), 3.68 (m, 1H), 3.62 (m, 1H), 3.41 (s, 3H), 2.61 (m, 2H), 2.28 (s, 6H). <sup>13</sup>C NMR

(125 MHz, CDCl<sub>3</sub>): 143.83, 143.73, 140.29, 136.22, 134.41, 133.37, 131.87, 129.69, 128.33, 127.94, 117.33, 115.15, 78.67, 68.60, 64.29, 64.18, 58.93, 46.02 (2 Me), 37.86. MS (ESI): [M+H]<sup>+</sup> = 439 (1 Cl). HRMS (ESI): m/z calcd. for C<sub>20</sub>H<sub>24</sub>ClN<sub>2</sub>O<sub>5</sub>S [M+H]<sup>+</sup>: 439.1089, found: 439.1091.

**9-Chloro-6-methyl-12-(2-pyrrolidin-1-ylethoxy)-2,3,6,12-tetrahydro[1,4]benzodioxino[6,7-c]benzo[f][1,2]thiazepine 7,7-dioxide (23c).** To the solution of 1-(2-hydroxyethyl)pyrrolidine (2.30 g, 20 mmol) in CH<sub>3</sub>CN (30 mL) crude **19** (3.40 g, 8.8 mmol) was added, and the solution obtained was stirred at room temperature for 2.5 h. Water (120 mL) was added dropwise, the oily product separated was extracted with DCM (2 × 50 mL). The combined organic phases were washed with water (50 mL), dried over Na<sub>2</sub>SO<sub>4</sub>, and evaporated in vacuo. The oily residue was purified by dry-column chromatography on a short silica gel column (thickness of stationary phase: 30 mm, eluent: heptane/DCM 1:1, 1:2, DCM, DCM/MeOH 100:1, 100:2, 100:4). After evaporation of solvents, the solid residue was triturated with EtOH to afford **23c** (1.56 g, 38%). M. p. 145–146 °C (CH<sub>3</sub>CN, colorless crystals). IR (KBr): 2946, 1509, 1325, 1160, 1060 cm<sup>-1</sup>. <sup>1</sup>H NMR (500 MHz, CDCl<sub>3</sub>): 7.89 (d, <sup>4</sup>J = 2.2 Hz, 1H), 7.64 (d, <sup>3</sup>J = 8.5 Hz, 1H), 7.43 (dd, <sup>4</sup>J = 2.2 Hz, <sup>3</sup>J = 8.4 Hz, 1H), 6.97 (s, 1H), 6.95 (s, 1H), 4.22 (s, 4H), 3.71 (m, 1H), 3.65 (m, 1H), 3.40 (s, 3H), 2.79 (t, <sup>3</sup>J = 6.2 Hz, 2H), 2.55 (m, 4H), 1.77 (m, 4H). <sup>13</sup>C NMR (125 MHz, CDCl<sub>3</sub>): 143.81, 143.70, 140.29, 136.23, 134.38, 133.33, 131.84, 129.69, 128.39, 127.91, 117.30, 115.22, 78.70, 69.53, 64.27, 64.17, 55.51, 54.72 (2C), 37.89, 23.47 (2C). MS (ESI): [M+H]<sup>+</sup> = 465 (1 Cl). HRMS (ESI): m/z calcd. for C<sub>22</sub>H<sub>26</sub>ClN<sub>2</sub>O<sub>5</sub>S [M+H]<sup>+</sup>: 465.1245, found: 465.1249.

**9-Chloro-6-methyl-12-(2-piperidin-1-ylethoxy)-2,3,6,12-tetrahydro[1,4]benzodioxino[6,7-c]benzo[f][1,2]thiazepine 7,7-dioxide (23d).** To the solution of 1-(2-hydroxyethyl)piperidine (1.29 g, 10 mmol) in CH<sub>3</sub>CN (15 mL) crude **19** (1.70 g, 4.4 mmol) was added, and the solution obtained was stirred at room temperature for 2 h. Water (60 mL) was added dropwise, the oily product separated was extracted with DCM (2 × 30 mL). The combined organic phases were washed with water (30 mL), dried over Na<sub>2</sub>SO<sub>4</sub>, and evaporated in vacuo. The oily residue was purified by dry-column chromatography on a short aluminum oxide column (thickness of stationary phase: 30 mm, eluent: heptane/DCM 2:1, 1:1, DCM, DCM/MeOH 100:1). After evaporation of solvents the residue was triturated with CH<sub>3</sub>CN to afford **23d** (1.40 g, 66%) as colorless crystals. M. p. 133–135 °C (CH<sub>3</sub>CN). IR (KBr): 1494, 1319, 1144, 1066 cm<sup>-1</sup>. <sup>1</sup>H NMR (500 MHz, CDCl<sub>3</sub>): 7.89 (d, <sup>4</sup>J = 2.2 Hz, 1H), 7.66 (d, <sup>3</sup>J = 8.6 Hz, 1H), 7.43 (dd, <sup>4</sup>J = 2.1 Hz, <sup>3</sup>J = 8.4 Hz, 1H), 6.97 (s, 1H), 6.96 (s, 1H), 5.69 (s, 1H), 4.22 (s, 4H), 3.69 (m, 1H), 3.64 (m, 1H), 3.40 (s, 3H), 2.63 (m, 2H), 2.42 (m, 4H), 1.57 (m,

4H), 1.43 (m, 2H). <sup>13</sup>C NMR (125 MHz, CDCl<sub>3</sub>): 143.79, 143.67, 140.29, 136.25, 134.35, 133.28, 131.82, 129.74, 128.53, 127.86, 117.27, 115.29, 78.70, 68.17, 64.26, 64.16, 58.52, 55.08 (2C), 37.97, 25.95 (2C), 24.16. MS (ESI): [M+H]<sup>+</sup> = 479 (1 Cl). HRMS (ESI): m/z calcd. for C<sub>23</sub>H<sub>28</sub>ClN<sub>2</sub>O<sub>5</sub>S [M+H]<sup>+</sup>: 479.1402, found: 479.1403.

**9-Chloro-6-methyl-12-(2-morpholin-4-ylethoxy)-2,3,6,12-tetrahydro[1,4]benzodioxino[6,7-c]benzo[f][1,2]thiazepine 7,7-dioxide (23e).** To the solution of 4-(2-hydroxyethyl)morpholine (1.15 g, 8.8 mmol) in CH<sub>3</sub>CN (15 mL) crude **19** (1.55 g, 4 mmol) was added and the solution obtained was stirred at room temperature for 2 h. Water (60 mL) was added dropwise, the product separated was filtered, washed with water (2 × 3 mL), air-dried and purified by dry-column chromatography on a short silica gel column (thickness of stationary phase: 30 mm, eluent: heptane/DCM 1:1, 1:2, DCM, DCM/MeOH 100:1, 100:2). After evaporation of solvents the residue was triturated with CH<sub>3</sub>CN to afford **23e** (1.61 g, 84%) as colorless crystals. M. p. 191–194 °C (CH<sub>3</sub>CN, decomp.). IR (KBr): 1510, 1325, 1146, 1066 cm<sup>-1</sup>. <sup>1</sup>H NMR (500 MHz, CDCl<sub>3</sub>): 7.89 (d, <sup>4</sup>J = 2.1 Hz, 1H), 7.65 (d, <sup>3</sup>J = 8.4 Hz, 1H), 7.44 (dd, <sup>4</sup>J = 2.0 Hz, <sup>3</sup>J = 8.4 Hz, 1H), 6.98 (s, 1H), 6.97 (s, 1H), 5.70 (s, 1H), 4.22 (s, 4H), 3.71 (m, 1H), 3.70 (m, 4H), 3.65 (m, 1H), 3.40 (s, 3H), 2.68 (t, <sup>3</sup>J = 5.7 Hz, 2H), 2.50 (m, 4H). <sup>13</sup>C NMR (125 MHz, CDCl<sub>3</sub>): 143.82, 143.66, 140.18, 136.15, 134.39, 133.05, 131.85, 129.73, 128.25, 127.90, 117.19, 115.11, 78.55, 67.74, 66.86 (2C), 64.25, 64.15, 58.18, 54.06 (2C), 37.91. MS (ESI): [M+H]<sup>+</sup> = 481 (1 Cl). HRMS (ESI): m/z calcd. for C<sub>22</sub>H<sub>26</sub>ClN<sub>2</sub>O<sub>6</sub>S [M+H]<sup>+</sup>: 481.1195, found: 481.1200.

**9-Chloro-6-methyl-12-[(2-morpholin-4-ylethyl)sulfanyl]-2,3,6,12-tetrahydro[1,4]benzodioxino[6,7-c]benzo[f][1,2]thiazepine 7,7-dioxide (24).** To the solution of 2-(morpholin-4-yl)ethanethiol (1.30 g, 8.8 mmol) in CH<sub>3</sub>CN (15 mL) crude **19** (1.55 g, 4 mmol) was added and it was stirred at room temperature for 1 h. Water (60 mL) was added dropwise, the product separated was filtered, washed with water (2 × 3 mL), and air-dried to give crude **24**. It was purified by dry-column chromatography on a short silica gel column (thickness of stationary phase: 30 mm, eluent: DCM, DCM/MeOH 100:2). After evaporation of solvents, the solid residue was triturated with CH<sub>3</sub>CN (10 mL) and filtered to afford crude **24** (1.93 g), which was recrystallized from CH<sub>3</sub>CN to give **24** (1.44 g, 72%) as colorless crystals. M. p. decomp. from 240 °C (CH<sub>3</sub>CN). IR (KBr): 1511, 1326, 1301, 1114, 1063 cm<sup>-1</sup>. <sup>1</sup>H NMR (500 MHz, CDCl<sub>3</sub>): 7.94 (d, <sup>3</sup>J = 8.2 Hz, 1H), 7.40 (dd, <sup>4</sup>J = 2.2 Hz, <sup>3</sup>J = 8.3 Hz, 1H), 7.31 (d, <sup>3</sup>J = 8.3 Hz, 1H), 6.99 (s, 1H), 6.75 (s, 1H), 4.95 (s, 1H), 4.25 (m, 4H), 3.69 (m, 4H), 3.51 (s, 3H), 2.60 (m, 1H), 2.50 (m, 2H), 2.46 (m, 1H), 2.40 (m, 4H). <sup>13</sup>C NMR (125 MHz, CDCl<sub>3</sub>): 144.32, 143.05, 142.31, 134.63, 134.55, 132.50, 131.89, 131.72, 131.44, 127.79, 118.10, 117.90, 66.82 (2C), 64.33,

64.26, 58.22, 54.34, 53.54 (2C), 39.35, 30.28. MS (ESI):  $[M+H]^+ = 497$  (1 Cl). HRMS (ESI):  $m/z$  calcd. for  $C_{22}H_{26}ClN_2O_5S_2$   $[M+H]^+$ : 497.0966, found: 497.0970.

**9-Chloro-2,3-dihydro[1,4]benzodioxino[6,7-*c*]benzo[*f*][1,2]thiazepin-12(6*H*)-one 7,7-dioxide (28).** Compound **7** (14.89 g, 40.7 mmol) was mixed with pyridine hydrochloride (47 g, 407 mol) and the mixture was melted. The melt was stirred at 180 °C for 27 h. Water (230 mL) was added to the cooled reaction mixture (dark brown melt), the suspension obtained was stirred for 2 h, the product was filtered and washed thoroughly with water. The wet crude product on the sintered glass filter was treated with aqueous NaOH solution (80 + 30 mL, 116 g of 5 m/m % solution, containing 5.8 g, ca. 145 mmol NaOH). The filtrate was acidified with AcOH (10 mL, 173 mmol), the product precipitated was collected by filtration, washed with water (3 × 30 mL), air-dried and purified by dry-column flash chromatography on a short silica gel column (thickness of stationary phase: 35 mm, eluent:  $CHCl_3$ ,  $CHCl_3/MeOH$  100:3) After evaporation of the solvents the solid residue was triturated with  $CH_3CN$  (40 mL) to afford **28** (6.27 g, 51%) as yellow solid. M. p. 276–278 °C ( $CH_3CN$ , bright yellow crystals). IR (KBr): 3146, 1600, 1503, 1289  $cm^{-1}$ .  $^1H$  NMR (500 MHz,  $DMSO-d_6$ ): 11.72 (br s, 1H), 7.90 (dd,  $^4J = 2.1$  Hz,  $^3J = 8.2$  Hz, 1H), 7.88 (dd,  $^4J = 0.4$  Hz,  $^4J = 2.1$  Hz, 1H), 7.83 (dd,  $^4J = 0.5$  Hz,  $^3J = 8.2$  Hz, 1H), 7.51 (s, 1H), 6.70 (s, 1H), 4.36 (m, 2H), 4.29 (m, 2H).  $^{13}C$  NMR (125 MHz,  $DMSO-d_6$ ): 189.20, 149.53, 140.53, 139.65, 137.14, 134.46, 133.51, 132.97, 132.40, 122.01, 120.37, 118.36, 108.75, 65.18, 64.07. MS (EI):  $M^+ = 351$  (1 Cl). HRMS (ESI):  $m/z$  calcd. for  $C_{15}H_{11}ClNO_5S$   $[M+H]^+$ : 352.0041, found: 352.0046.

**6-(2-Bromoethyl)-9-chloro-2,3,6,12-tetrahydro[1,4]benzodioxino[6,7-*c*]benzo[*f*][1,2]thiazepin-12-ol 7,7-dioxide (30).** To the suspension of **29** (9.175 g, 20 mmol) in a mixture of THF (20 mL) and EtOH (20 mL),  $NaBH_4$  (0.91 g, 24 mmol) was added in portions and the stirring was continued at room temperature for 30 min. Water (200 mL) was added, and the oily product separated was extracted with DCM (2 × 100 mL). The combined organic phases were washed with water (50 mL), dried over  $Na_2SO_4$ , and evaporated in vacuo to give crude **30** (9.09 g, 99%) as colorless foam suitable for next reaction step. IR (KBr): 3484, 1499, 1327, 1304, 1141, 1065  $cm^{-1}$ .  $^1H$  NMR (600 MHz,  $CDCl_3$ ): 7.89 (d,  $^4J = 2.2$  Hz, 1H), 7.65 (d,  $^3J = 8.4$  Hz, 1H), 7.49 (dd,  $^4J = 2.1$  Hz,  $^3J = 8.4$  Hz, 1H), 7.04 (s, 1H), 6.94 (s, 1H), 6.07 (d,  $^3J = 6.1$  Hz, 1H), 4.25 (s, 4H), 4.03 (m, 2H), 3.54 (m, 1H), 3.47 (m, 1H), 3.38 (d,  $^3J = 6.4$  Hz, 1H).  $^{13}C$  NMR (150 MHz,  $CDCl_3$ ): 143.99, 143.97, 139.94, 136.91, 134.70, 133.42, 132.65, 129.22, 128.05, 127.92, 117.26, 116.74, 72.29, 64.31, 64.26, 52.83, 29.10. COSY: 7.89–7.49–7.65, 6.07–3.38, 4.03–(3.54, 3.47). HSQC (140 Hz): 7.89–127.92, 7.65–129.22, 7.49–132.65, 7.04–116.74, 6.94–117.26, 6.07–72.29, 4.25–64.31, 4.25–64.26, 4.03–52.83,

3.54–29.10, 3.47–29.10. HMBC (8 Hz, 140 Hz): 7.89–(136.91, 134.70, 132.65), 7.65–(139.94, 134.70, 72.29), 7.49–(136.91, 134.70, 127.92), 7.04–(143.97, 128.05, 72.29), 6.94–(143.99, 133.42), 6.07–(139.94, 136.91, 133.42, 129.22, 128.05, 116.74), 4.25–(143.99, 64.26), 4.25–(143.97, 64.31), 4.03–(128.05, 29.10), (3.54, 3.47)–52.83, 3.38–(136.91, 133.42, 72.29). MS (EI):  $M^+$  = 459 (1 Br, 1 Cl). HRMS (ESI):  $m/z$  calcd. for  $C_{17}H_{15}BrClNaO_5S$  [ $M+Na$ ] $^+$ : 481.9435, found: 481.9438.

**6-(2-Bromoethyl)-9,12-dichloro-2,3,6,12-tetrahydro[1,4]benzodioxino[6,7-c]benzo[f][1,2]thiazepine 7,7-dioxide (31).** To a vigorously stirred yellow solution of **30** (8.75 g, 19 mmol) in DCM (100 mL),  $SOCl_2$  (4.52 g, 38 mmol, 2.76 mL) was added dropwise at room temperature and stirring was continued for 2.5 h. To the solution hexane (400 mL) was added dropwise, the product precipitated was filtered, washed with hexane (2 × 20 mL), and dried in vacuo to give **31** (6.02 g, 66%) as beige crystals. M. p. decomp. from 144 °C. The mother liquor of this product was evaporated in vacuo, the solid residue was triturated with a little cold  $Et_2O$  to give a second crop of crude **31** (2.21 g, 24%) as beige crystals. Total yield: 8.23 g, 90%. IR (KBr): 1510, 1332, 1303, 1160, 1064  $cm^{-1}$ .  $^1H$  NMR (400 MHz,  $CDCl_3$ ): 7.96 (d,  $^4J = 2.1$  Hz, 1H), 7.48 (dd,  $^4J = 2.1$  Hz,  $^3J = 8.4$  Hz, 1H), 7.44 (d,  $^3J = 8.4$  Hz, 1H), 7.10 (s, 1H), 6.92 (s, 1H), 6.04 (s, 1H), 4.33 (m, 1H), 4.26 (m, 4H), 4.01 (m, 1H), 3.73 (t,  $^3J = 7.4$  Hz, 2H).  $^{13}C$  NMR (100 MHz,  $CDCl_3$ ): 145.25, 143.97, 141.40, 136.19, 133.33, 132.89, 132.60, 130.58, 130.34, 128.20, 119.97, 118.87, 64.31, 64.29, 63.08, 54.27, 29.60. HRMS (TOF MS EI):  $m/z$  calcd. for  $[C_{17}H_{14}BrCl_2NO_4S]^+$ : 476.9204, found: 476.9200.

**S-[2-(9-Chloro-12-hydroxy-7,7-dioxido-2,3-dihydro[1,4]benzodioxino[6,7-c]benzo[f][1,2]thiazepin-6(12*H*)-yl)ethyl] ethanethioate (32).** To a solution of **30** (1.015 g, 2.2 mmol) in  $CH_3CN$  (10 mL), potassium thioacetate (0.43 g, 3.75 mmol, 1.7 equiv) and tetrabutylammonium bromide (0.032 g, 0.1 mmol, 4.5 mol%) were added, and the thin suspension was vigorously stirred at room temperature for 4 h. To the thin suspension obtained, water (50 mL) and  $EtOAc$  (25 mL) were added with stirring (25 min). The phases were separated, the aqueous phase was washed with  $EtOAc$  (10 mL), the combined organic phases were washed with water (15 mL), dried over  $Na_2SO_4$ , and evaporated in vacuo. The residue was subjected to dry-column flash chromatography on a short silica gel column (thickness of stationary phase: 30 mm, eluent: heptane/DCM 1:1, 1:2, DCM, DCM/MeOH 100:1, 100:2). After evaporation of the solvents, the residue was dried in vacuo to afford **32** (0.84 g, 84%) as colorless foam. IR (KBr): 3479, 1692, 1500, 1306, 1155, 1139, 1064  $cm^{-1}$ .  $^1H$  NMR (600 MHz,  $CDCl_3$ ): 7.92 (d,  $^4J = 1.9$  Hz, 1H), 7.64 (d,  $^3J = 8.3$  Hz, 1H), 7.51 (dd,  $^4J = 1.9$  Hz,  $^3J = 8.3$  Hz, 1H), 7.05 (s, 1H), 6.98 (s, 1H), 5.96 (d,  $^3J = 7.3$  Hz, 1H), 4.26 (s, 4H), 3.77 (t,  $^3J = 7.3$  Hz, 2H),

3.54 (d,  $^3J = 7.3$  Hz, 1H), 3.03 (m, 2H), 2.30 (s, 3H).  $^{13}\text{C}$  NMR (150 MHz,  $\text{CDCl}_3$ ): 195.08, 144.10, 143.67, 140.01, 136.61, 134.70, 132.70, 132.08, 129.76, 128.68, 127.94, 117.39, 116.81, 73.23, 64.32 (2C), 50.75, 30.58, 28.07. COSY: 7.64–7.51, 5.96–3.54, 3.77–3.03. HSQC (140 Hz): 7.92–127.94, 7.64–129.76, 7.51–132.70, 7.05–117.39, 6.98–116.81, 5.96–73.23, 4.26–64.32, 3.77–50.75, 3.03–28.07, 2.30–30.58. HMBC (140 Hz, 8 Hz): 7.92–(136.61, 134.70, 132.70), 7.64–(140.01, 134.70, 73.23), 7.51–(136.61, 127.94), 7.05–(144.10, 128.68, 73.23), 6.98–(143.67, 132.08), 5.96–(140.01, 136.61, 132.08, 129.76, 128.68, 117.39), 4.26–(143.67, 140.01, 64.32), 3.77–(128.68, 28.07), 3.54–(136.61, 132.08, 73.23), 3.03–(195.08, 50.75), 2.30–195.08. HRMS (ESI):  $m/z$  calcd. for  $\text{C}_{19}\text{H}_{18}\text{ClNNaO}_6\text{S}_2$   $[\text{M}+\text{Na}]^+$ : 478.0156, found: 478.0158.

**9-Chloro-2,3-dihydro-12*H*-12,6-(epithioethano)[1,4]benzodioxino[6,7-**

**c]benzo[*f*][1,2]thiazepine 7,7-dioxide (26).** To the solution of compound **32** (0.64 g, 1.4 mmol) in MeOH (12 mL),  $\text{K}_2\text{CO}_3$  (0.31 g, 2.24 mmol) was added, and the reaction mixture was stirred under argon atmosphere at room temperature for 30 min. The solution obtained was diluted with water (30 mL), and aqueous HCl solution (5 m/m%, 4.2 mL) was added dropwise. The thiol intermediate separated was dissolved by adding DCM (40 mL), the layers were separated, and the aqueous layer was washed with DCM (10 mL). The combined organic phases were washed with water (15 mL), dried over  $\text{Na}_2\text{SO}_4$  and evaporated in vacuo to give crude thiol intermediate as a dense colorless oil. It was dissolved in DCM (100 mL), *p*-TsOH· $\text{H}_2\text{O}$  (0.057 g, 0.3 mmol, 21 mol %) was added and the reaction mixture was stirred under argon atmosphere at room temperature for 1 h. Then it was evaporated to 30 mL of volume and purified by passing it through a short silica gel column (thickness of stationary phase: 30 mm, eluent: DCM). After evaporation of the solvent, the partly crystalline residue was triturated with DIPE (5 mL) to afford **26** (0.504 g, 91%) as colorless crystals. M. p. 258–259.5 °C ( $\text{CH}_3\text{CN}$ ). IR (KBr): 3449, 1506, 1338, 1304, 1159, 1062, 595  $\text{cm}^{-1}$ .  $^1\text{H}$  NMR (600 MHz,  $\text{CDCl}_3$ ): 7.90 (d,  $^4J = 2.2$  Hz, 1H), 7.46 (dd,  $^4J = 2.2$  Hz,  $^3J = 8.4$  Hz, 1H), 7.32 (d,  $^3J = 8.4$  Hz, 1H), 6.99 (s, 1H), 6.78 (s, 1H), 4.78 (s, 1H), 4.47 (dt,  $^3J = 14.6$  Hz,  $^3J = 3.0$  Hz, 1H), 4.24 (m, 4H), 3.50 (~t,  $^3J = 14.6$  Hz, 1H), 3.29 (~t,  $^3J = 15.3$  Hz, 1H), 2.59 (dt,  $^3J = 15.3$  Hz,  $^4J = 2.9$  Hz, 1H).  $^{13}\text{C}$  NMR (150 MHz,  $\text{CDCl}_3$ ): 143.93, 143.65, 143.57, 137.04, 134.65, 133.07, 132.81, 132.15, 131.20, 127.24, 120.19, 116.13, 64.34, 64.15, 51.70, 51.52, 27.79. COSY: 7.46–7.32, (4.47, 3.50)–(3.29, 2.59). HSQC (140 Hz): 7.90–127.24, 7.46–132.81, 7.32–132.15, 6.99–120.19, 6.78–116.13, 4.78–51.52, (4.47, 3.50)–51.70, 4.24–64.34/64.15, (3.29, 2.59)–27.79. HMBC (140 Hz, 8 Hz): 7.90–(134.65, 132.81), 7.46–(134.65, 127.24), 7.32–(143.65, 133.07, 51.52), 6.99–(143.93, 137.04, 132.10), 6.78–(143.57, 131.20, 51.52), 4.78–(143.65, 137.04, 131.20,

116.13, 27.79), (4.47, 3.50)–(131.20, 27.79), 4.24–(143.93, 143.57), (3.29, 2.59)–(51.70, 51.52). HRMS (ESI):  $m/z$  calcd. for  $C_{17}H_{15}ClNO_4S_2$   $[M+H]^+$ : 396.0126, found: 396.0128.

**9-Chloro-2,3,6,12-tetrahydro[1,4]benzodioxino[6,7-*c*]benzo[*f*][1,2]thiazepin-12-ol 7,7-dioxide (33).** To a solution of **28** (9.74 g, 27.7 mmol) in an aqueous NaOH solution (5.54 g, 138.5 mmol NaOH dissolved in 250 mL of water),  $NaBH_4$  (5.24 g, 138.5 mmol) was added in several portions while cooling the reaction mixture with tap water. After stirring at room temperature for 69 h (weekend), the yellow solution was cooled with ice-water, and an aqueous HCl solution (6 M, 60 mL) was added dropwise over a period of 30 min. The oily product separated was dissolved by adding DCM (300 mL), the phases were separated, the organic phase was dried over  $Na_2SO_4$  and purified by passing through a short silica gel column (thickness of stationary phase: 35 mm, eluent: DCM, DCM/MeOH 100:1). After evaporation of the solvents, the residue (10.9 g of greyish foam) was triturated with  $CH_3CN$  to afford **33** (8.18 g, 83%) as pale pink crystals. M. p. decomp. from 180 °C. IR (KBr): 3488, 3238, 1509, 1322, 1138, 1066  $cm^{-1}$ .  $^1H$  NMR (500 MHz,  $DMSO-d_6$ ): 10.37 (br s, 1H), 7.87 (m, 1H), 7.71 (m, 2H), 7.10 (s, 1H), 6.70 (s, 1H), 6.66 (br s, 1H), 6.49 (s, 1H), 4.21 (m, 4H).  $^{13}C$  NMR (125 MHz,  $DMSO-d_6$ ): 142.72, 142.26, 139.71, 139.41, 132.61, 132.42, 132.07, 127.44, 125.58, 125.27, 115.06, 113.64, 65.80, 64.32, 64.31. MS (ESI):  $[M-H]^- = 352$  (1 Cl). HRMS (ESI):  $m/z$  calcd. for  $C_{15}H_{12}ClNNaO_5S$   $[M+Na]^+$ : 376.0017, found: 376.0020.

**9,12-Dichloro-2,3,6,12-tetrahydro[1,4]benzodioxino[6,7-*c*]benzo[*f*][1,2]thiazepine 7,7-dioxide (34).** To a vigorously stirred suspension of **33** (2.12 g, 6 mmol) in DCM (15 mL),  $SOCl_2$  (0.95 g, 8 mmol, 0.58 mL) was added at room temperature. After 5 min of stirring the starting material was completely dissolved, and the product began to crystallize. Stirring was continued for 2 h, hexane (80 mL) was added dropwise to the suspension. The product was filtered, washed with hexane, and dried in vacuo to give crude **34** (2.23 g, 100%) as beige crystals. M. p. decomp. from 105 °C. IR (KBr): 3263, 1512, 1328, 1161, 1061  $cm^{-1}$ .  $^1H$  NMR (500 MHz,  $CDCl_3$ ): 7.91 (d,  $^4J = 2.2$  Hz, 1H), 7.46 (dd,  $^4J = 2.2$  Hz,  $^3J = 8.3$  Hz, 1H), 7.36 (d,  $^3J = 8.4$  Hz, 1H), 7.23 (br s, 1H), 7.08 (s, 1H), 6.88 (s, 1H), 5.86 (s, 1H), 4.25 (m, 4H).  $^{13}C$  NMR (125 MHz,  $CDCl_3$ ): 145.13, 143.80, 141.92, 136.82, 133.38, 132.49, 131.79, 130.76, 129.06, 126.21, 121.30, 117.65, 64.30, 64.24, 63.27. MS (ESI):  $[M-Cl+OH-H]^- = 352$  (1 Cl) (after a rapid hydrolysis of **34** the compound **33** was detected).

**12-(2-Bromoethoxy)-9-chloro-2,3,6,12-tetrahydro[1,4]benzodioxino[6,7-*c*]benzo[*f*][1,2]thiazepine 7,7-dioxide (35).** To a stirred solution of 2-bromoethanol (4.50 g, 36 mmol, 2.56 mL) in  $CH_3CN$  (15 mL), **34** (2.23 g, 6 mmol) was added in portions at 20 °C. The thin suspension obtained was stirred at room temperature for 6 h, then it was evaporated in

vacuo. The oily residue was purified by dry-column flash chromatography on a short silica gel column (thickness of stationary phase: 30 mm, eluent: heptane/DCM 1:1, 1:2, DCM). After evaporation of the solvents the residue was triturated with Et<sub>2</sub>O (5 mL), filtered and dried in vacuo to give **35** (1.69 g, 61%) as off-white crystals. M. p. decomp. from 180 °C. IR (KBr): 3210, 1498, 1320, 1158, 1064 cm<sup>-1</sup>. <sup>1</sup>H NMR (500 MHz, CDCl<sub>3</sub>): 7.89 (d, *J*<sup>4</sup>*J* = 2.2 Hz, 1H), 7.67 (br s, 1H), 7.43 (dd, *J*<sub>I</sub> = 2.2 Hz, <sup>3</sup>*J* = 8.3 Hz, 1H), 7.37 (d, <sup>3</sup>*J* = 8.3 Hz, 1H), 7.01 (s, 1H), 6.83 (s, 1H), 5.29 (br s, 1H), 4.22 (m, 4H), 3.84 (m, 1H), 3.79 (m, 1H), 3.50 (m, 2H). <sup>13</sup>C NMR (125 MHz, CDCl<sub>3</sub>): 144.24, 143.55, 142.13, 136.24, 133.77, 132.02, 131.12, 130.59, 129.03, 125.84, 120.05, 116.90, 83.67, 69.27, 64.31, 64.19, 30.51. MS (ESI): [M-H]<sup>-</sup> = 458 (1 Br, 1 Cl). HRMS (ESI): *m/z* calcd. for C<sub>17</sub>H<sub>15</sub>BrCINNaO<sub>5</sub>S [M+Na]<sup>+</sup>: 481.9435, found: 481.9431.

**9-Chloro-2,3-dihydro-12*H*-12,6-(epoxyethano)[1,4]benzodioxino[6,7-**

**c]benzo[*f*][1,2]thiazepine 7,7-dioxide (27).** To a solution of **35** (1.475 g, 3.2 mmol) in CH<sub>3</sub>CN (40 mL), K<sub>2</sub>CO<sub>3</sub> (1.38 g, 10 mmol) was added, and the suspension obtained was stirred at room temperature for 5 h. Water (200 mL) was added dropwise. The product precipitated was filtered, washed with water (2 × 5 mL), air-dried and purified by dry-column flash chromatography on a short aluminum oxide column (thickness of stationary phase: 30 mm, eluent: hexane/DCM 1:1, 1:2, DCM). After evaporation of the solvents the residue was recrystallized from CH<sub>3</sub>CN (12 mL) to afford **27** (0.86 g, 71%) as colorless crystals. M. p. 228–229 °C (CH<sub>3</sub>CN). IR (KBr): 1506, 1338, 1164, 1061, 612 cm<sup>-1</sup>. <sup>1</sup>H NMR (500 MHz, CDCl<sub>3</sub>): 7.89 (d, <sup>4</sup>*J* = 2.1 Hz, 1H), 7.47 (dd, <sup>4</sup>*J* = 2.2 Hz, <sup>3</sup>*J* = 8.3 Hz, 1H), 7.33 (d, <sup>3</sup>*J* = 8.2 Hz, 1H), 7.03 (s, 1H), 6.81 (s, 1H), 5.48 (s, 1H), 4.23 (m, 2H), 4.21 (m, 2H), 4.18 (m, 1H), 4.10 (m, 1H), 3.74 (m, 1H), 3.56 (m, 1H). <sup>13</sup>C NMR (125 MHz, CDCl<sub>3</sub>): 144.71, 144.18, 144.03, 136.35, 134.31, 133.07, 132.47, 131.44, 130.43, 127.94, 119.70, 117.28, 83.18, 64.29, 64.17, 61.88, 52.62. NOE: 3.74–(7.03, 6.81, 5.48, 4.10, 3.56), 3.56–(7.03, 6.81, 5.48, 4.18, 3.74). COSY: 7.89–7.47–7.33, 4.23–4.21, (4.18, 3.56)–(4.10, 3.74). HSQC (140 Hz): 7.89–127.94, 7.47–132.47, 7.33–133.09, 7.03–119.70, 6.81–117.28, 5.48–83.18, 4.23–64.17, 4.21–64.29, 4.18–52.62, 4.10–61.88, 3.74–61.88, 3.56–52.62. HMQC (140 Hz, 8 Hz): 7.89–(136.35, 132.47, 131.44), 7.47–(136.35, 131.44, 127.94), 7.33–(144.71, 136.35, 83.18), 7.03–(144.03, 134.31, 130.43), 6.81–(144.18, 130.43, 119.70, 83.18), 5.48–(144.71, 134.31, 130.43, 117.28, 61.88), 4.23–(144.18, 64.29), 4.21–(144.03, 64.17), 4.18–(130.43, 83.18), 4.10–83.18, 3.74–83.18, 3.56–61.88. MS (ESI): [M+H]<sup>+</sup> = 380 (1 Cl). HRMS (ESI): *m/z* calcd. for C<sub>17</sub>H<sub>15</sub>ClNO<sub>5</sub>S [M+H]<sup>+</sup>: 380.0354, found: 380.0354.

**10-Chloro-7-methyl-2,3,7,13-tetrahydro[1,4]benzodioxino[6,5-*c*]benzo[*f*][1,2]thiazepin-13-ol 8,8-dioxide (36).** To a suspension of **8** (2.23 g, 6.1 mmol) in DMF (15 mL) and EtOH (15 mL), NaBH<sub>4</sub> (0.46 g, 12.2 mmol) was added, and the reaction mixture was stirred at room



temperature for 3 h. To the solution obtained water (150 mL) was added dropwise. The separated product was filtered, washed with water, and dried in vacuo to give **36** (2.00 g, 89%) as colorless crystals. The quality of the rigorously dried compound was suitable for the next reaction step. A sample of **36** (0.65 g) was purified by dry-column chromatography on a short silica gel column (thickness of stationary phase: 20 mm, eluent: DCM, DCM/MeOH 100:1). After evaporation of solvents, the oily residue was triturated with DIPE, filtered and dried in vacuo to afford **36** (0.585 g, 84%) as colorless crystals. M. p. decomp. from 155 °C. IR (KBr): 3544, 1490, 1346, 847, 589 cm<sup>-1</sup>. <sup>1</sup>H NMR (500 MHz, DMSO-*d*<sub>6</sub>): 7.77 (d, <sup>4</sup>*J* = 2.2 Hz, 1H), 7.68 (dd, <sup>4</sup>*J* = 2.3 Hz, <sup>3</sup>*J* = 8.3 Hz, 1H), 7.61 (d, <sup>3</sup>*J* = 8.3 Hz, 1H), 6.99 (d, <sup>3</sup>*J* = 8.5 Hz, 1H), 6.92 (d, <sup>3</sup>*J* = 8.5 Hz, 1H), 6.22 (d, <sup>3</sup>*J* = 4.3 Hz, 1H), 6.14 (d, <sup>3</sup>*J* = 4.2 Hz, 1H), 4.33 (m, 2H), 4.26 (m, 2H), 3.41 (s, 3H). <sup>13</sup>C NMR (125 MHz, DMSO-*d*<sub>6</sub>): 143.50, 142.88, 140.77, 136.68, 134.35, 133.90, 132.16, 131.50, 130.18, 126.93, 122.62, 117.62, 66.79, 64.51, 63.89, 40.72. MS (EI): [M]<sup>+</sup> = 367 (1 Cl). HRMS (ESI): *m/z* calcd. for C<sub>16</sub>H<sub>14</sub>ClNaO<sub>5</sub>S [M+Na]<sup>+</sup>: 390.0173, found: 390.0179.

**10,13-Dichloro-7-methyl-2,3,7,13-tetrahydro[1,4]benzodioxino[6,5-**

**c]benzo[f][1,2]thiazepine 8,8-dioxide (37).** To a vigorously stirred suspension of **36** (2.39 g, 6.5 mmol) in DCM (25 mL), SOCl<sub>2</sub> (0.93 g, 7.8 mmol, 0.57 mL) was added dropwise at room temperature. The solution obtained was stirred at room temperature for 1.5 h. To the suspension obtained hexane (75 mL) was added, the product was filtered, washed with hexane (2 × 8 mL) and dried in vacuo to give crude **37** (2.36 g, 94%) as colorless crystals. M. p. decomp. from 90 °C. The product was used without purification for the next reaction step. IR (KBr): 1497, 1337, 1161, 1061, 854, 577 cm<sup>-1</sup>. <sup>1</sup>H NMR (500 MHz, CDCl<sub>3</sub>): 7.97 (m, 1H), 7.47 (m, 2H), 7.00 (d, <sup>3</sup>*J* = 8.7 Hz, 1H), 6.96 (d, <sup>3</sup>*J* = 8.7 Hz, 1H), 6.72 (s, 1H), 4.20–4.40 (m, 4H), 3.54 (s, 3H). <sup>13</sup>C NMR (125 MHz, CDCl<sub>3</sub>): 143.45, 142.21, 140.50, 136.13, 133.43, 133.20, 132.73, 132.25, 127.87, 126.13, 121.52, 119.34, 64.64, 63.79, 53.59, 39.44. MS (EI): [M]<sup>+</sup> = 385 (2 Cl). HRMS (TOF MS EI): *m/z* calcd. for [C<sub>16</sub>H<sub>13</sub>Cl<sub>2</sub>NO<sub>4</sub>S]<sup>+</sup>: 384.9942, found: 384.9940.

**10-Chloro-7-methyl-13-pyrrolidin-1-yl-2,3,7,13-tetrahydro[1,4]benzodioxino[6,5-**

**c]benzo[f][1,2]thiazepine 8,8-dioxide (38a).** To the cooled solution of pyrrolidine (0.106 g, 1.5 mmol) in CH<sub>3</sub>CN (2 mL) **37** (0.1785 g, 0.46 mmol) was added. The solution obtained was stirred at room temperature for 1 h. Water (10 mL) was added dropwise, the product separated was filtered, washed with water (2 × 1 mL), air-dried and purified by dry-column chromatography on a short silica gel column (thickness of stationary phase: 20 mm, eluent: DCM, DCM/MeOH 100:2). After evaporation of solvents, the residue (0.19 g of colorless oil) was triturated with DIPE (2 mL) to afford **38a** (0.153 g, 79%) as colorless crystals. M. p.

decomp. from 213 °C (CH<sub>3</sub>CN, bright colorless crystals). IR (KBr): 1491, 1324, 1154, 1109, 1067 cm<sup>-1</sup>. <sup>1</sup>H NMR (500 MHz, CDCl<sub>3</sub>): 7.92 (m, 1H), 7.36 (m, 2H), 6.95 (d, <sup>3</sup>J = 8.6 Hz, 1H), 6.84 (d, <sup>3</sup>J = 8.7 Hz, 1H), 4.87 (s, 1H), 4.26 (m, 2H), 4.25 (m, 1H), 4.20 (m, 1H), 3.49 (s, 3H), 2.27 (m, 2H), 2.20 (m, 2H), 1.67 (m, 4H). <sup>13</sup>C NMR (125 MHz, CDCl<sub>3</sub>): 143.80, 143.56, 141.29, 135.17, 134.87, 133.62, 131.40, 130.91, 129.94, 128.12, 122.94, 117.69, 64.74, 64.20, 63.91, 53.24 (2C), 40.07, 23.17 (2C). MS (ESI): [M+H]<sup>+</sup> = 421 (1 Cl). HRMS (ESI): m/z calcd. for C<sub>20</sub>H<sub>22</sub>ClN<sub>2</sub>O<sub>4</sub>S [M+H]<sup>+</sup>: 421.0983, found: 421.0985.

#### **10-Chloro-7-methyl-N-(2-morpholin-4-ylethyl)-2,3,7,13-**

**tetrahydro[1,4]benzodioxino[6,5-c]benzo[f][1,2]thiazepin-13-amine 8,8-dioxide (38b).** To the solution of 4-(2-aminoethyl)morpholine (0.664 g, 5.1 mmol) in CH<sub>3</sub>CN (10 mL) **37** (0.608 g, 1.57 mmol) was added. The solution obtained was stirred at room temperature for 1 h. Water (50 mL) was added dropwise in 30 min, the product separated was filtered, washed with water (2 × 5 mL), air-dried and purified by dry-column chromatography on a short silica gel column (thickness of stationary phase: 25 mm, eluent: DCM, DCM/MeOH 100:2). After evaporation of solvents, the residue was triturated with CH<sub>3</sub>CN to afford **38b** (0.588 g, 78%) as colorless crystals. M. p. 203–205 °C (CH<sub>3</sub>CN). IR (KBr): 3350, 1493, 1313, 1119, 1062 cm<sup>-1</sup>. <sup>1</sup>H NMR (600 MHz, CDCl<sub>3</sub>): 7.95 (d, <sup>4</sup>J = 2.2 Hz, 1H), 7.42 (dd, <sup>4</sup>J = 2.2 Hz, <sup>3</sup>J = 8.2 Hz, 1H), 6.96 (d, <sup>3</sup>J = 8.8 Hz, 1H), 6.87 (d, <sup>3</sup>J = 8.7 Hz, 1H), 5.25 (s, 1H), 4.28 (m, 2H), 4.25 (m, 1H), 4.22 (m, 1H), 3.63 (m, 4H), 3.49 (s, 3H), 2.80 (br s, 1H), 2.60 (m, 2H), 2.50 (m, 1H), 2.35 (m, 1H), 2.24 (m, 4H). <sup>13</sup>C NMR (150 MHz, CDCl<sub>3</sub>): 143.32, 142.17, 140.80, 136.04, 134.53, 133.22, 131.56, 131.48, 128.69, 128.20, 120.32, 117.77, 66.81 (2C), 64.37, 63.83, 57.90 (2C), 53.44 (2C), 43.54, 38.51. COSY: 7.95–7.42–7.33, 6.96–6.87, 4.28–(4.25, 4.22), 3.63–2.24, 2.60–(2.50, 2.35). HSQC (140 Hz): 7.95–128.20, 7.42–131.48, 7.33–133.22, 6.96–120.32, 6.87–117.77, 5.25–57.90, 4.28–64.37, 4.25–63.83, 4.22–63.83, 3.63–66.81, 3.49–38.51, 2.60–43.54, 2.50–57.90, 2.35–57.90, 2.24–53.44. HMBC (8 Hz, 140 Hz): 7.95–(136.04, 134.53, 131.48), 7.42–(136.04, 134.53, 128.20), 7.33–(142.17, 134.53, 57.90), 6.96–(143.32, 128.69), 6.87–(140.83, 131.56), 5.25–(142.17, 140.83, 136.04, 133.22, 131.56, 128.69, 43.54), 4.28–(140.83, 63.83), (4.25, 4.22)–(143.32, 64.37), 3.63–66.81, 3.49–131.56, 2.60–57.90, (2.50, 2.35)–(53.44, 43.54), 2.24–53.44. MS (EI): [M]<sup>+</sup> = 479 (1 Cl). HRMS (ESI): m/z calcd. for C<sub>22</sub>H<sub>27</sub>ClN<sub>3</sub>O<sub>5</sub>S [M+H]<sup>+</sup>: 480.1354, found: 480.1357.

**Ethyl 7-[(10-chloro-7-methyl-8,8-dioxido-2,3,7,13-tetrahydro[1,4]benzodioxino[6,5-c]benzo[f][1,2]thiazepin-13-yl)amino]heptanoate (38c).** To a solution of ethyl 7-aminoheptanoate (1.73 g, 10 mmol) in CH<sub>3</sub>CN (15 mL) **37** (1.425 g, 3.7 mmol) was added, the solution obtained was stirred at room temperature for 1 h. The solution was evaporated in vacuo,

the oily residue was dissolved in DCM (40 mL), washed with water (2 × 20 mL), dried over Na<sub>2</sub>SO<sub>4</sub>, and evaporated in vacuo. The oily residue was purified by dry-column flash chromatography on a short silica gel column (thickness of stationary phase: 30 mm, eluent: heptane/DCM 2:1, 1:1, DCM, DCM/MeOH 100:1). After evaporation of solvents in vacuo **38c** was obtained (1.63 g, 84%) as dense colorless oil which slowly solidified when stored at 5 °C. A small sample (0.20 g) was triturated with a little EtOH to afford **38c** (0.13 g) as colorless crystals. M. p. 81–83 °C. IR (KBr): 3326, 2928, 1726, 1493, 1322, 1146 cm<sup>-1</sup>. <sup>1</sup>H NMR (500 MHz, CDCl<sub>3</sub>): 7.94 (d, <sup>4</sup>J = 2.2 Hz, 1H), 7.43 (dd, <sup>4</sup>J = 2.2 Hz, <sup>3</sup>J = 8.3 Hz, 1H), 7.36 (d, <sup>3</sup>J = 8.3 Hz, 1H), 6.93 (d, <sup>3</sup>J = 8.7 Hz, 1H), 6.86 (d, <sup>3</sup>J = 8.7 Hz, 1H), 5.30 (s, 1H), 4.19–4.33 (m, 4H), 4.11 (q, <sup>3</sup>J = 7.2 Hz, 2H), 3.40 (s, 3H), 2.46 (t, <sup>3</sup>J = 7.1 Hz, 2H), 2.25 (t, <sup>3</sup>J = 7.5 Hz, 2H), 2.02 (br s, 1H), 1.58 (m, 2H), 1.44 (m, 2H), 1.27 (m, 4H), 1.24 (t, <sup>3</sup>J = 7.1 Hz, 3H). <sup>13</sup>C NMR (125 MHz, CDCl<sub>3</sub>): 173.65, 143.18, 141.91, 141.24, 136.13, 134.41, 133.17, 131.78, 131.67, 128.22, 128.13, 120.44, 117.67, 64.32, 63.83, 60.11, 58.21, 47.79, 38.72, 34.17, 29.75, 28.89, 26.88, 24.77, 14.19. MS (ESI): [M+H]<sup>+</sup> = 523 (1 Cl). HRMS (ESI): m/z calcd. for C<sub>25</sub>H<sub>32</sub>ClN<sub>2</sub>O<sub>6</sub>S [M+H]<sup>+</sup>: 523.1664, found: 523.1671.

**7-[(10-Chloro-7-methyl-8,8-dioxido-2,3,7,13-tetrahydro[1,4]benzodioxino[6,5-c]benzo[f][1,2]thiazepin-13-yl)amino]heptanoic acid (38d)**. To a solution of ester **38c** (1.41 g, 2.7 mmol) in EtOH (20 mL), NaOH (0.130 g, 3.25 mmol) dissolved in water (5 mL) was added at room temperature and the reaction mixture (gradually diluting suspension, later solution) was stirred at room temperature for 19 h (overnight stirring). Water (15 mL) was added, and the reaction mixture was partly evaporated in vacuo to remove ethanol. The solution obtained was neutralized with aqueous HCl solution (0.27 mL of cc. HCl dissolved in 2.7 mL of water, containing 3.25 mmol of HCl). It was stirred at room temperature for 4 h, the crystalline product obtained was filtered, washed with water (2 × 3 mL), and dried in vacuo to give **38d** (0.804 g, 60%) as an off-white amorphous solid. Melting range (glass-transition range): 76–85 °C. The aqueous mother liquor was extracted with EtOAc (2 × 20 mL), the combined organic phases were dried over Na<sub>2</sub>SO<sub>4</sub>, evaporated in vacuo, the residue was triturated with water (2 mL), the wet product was dried in vacuo to give a second crop of **38d** (0.30 g, 22%) as an off-white amorphous solid. Melting range (glass-transition range): 76–85 °C. Total yield: 1.10 g, 82%. IR (KBr): 2932, 1713, 1493, 1330, 1109, 1067 cm<sup>-1</sup>. <sup>1</sup>H NMR (500 MHz, CDCl<sub>3</sub>): 7.93 (d, <sup>4</sup>J = 1.5 Hz, 1H), 7.42 (m, 2H), 6.93 (d, <sup>3</sup>J = 8.8 Hz, 1H), 6.88 (d, <sup>3</sup>J = 8.7 Hz, 1H), 6.76 (br s, 2H), 5.43 (s, 1H), 4.28 (m, 3H), 4.23 (m, 1H), 3.38 (s, 3H), 2.50 (m, 2H), 2.18 (t, <sup>3</sup>J = 7.3 Hz, 2H), 1.52 (m, 2H), 1.45 (m, 2H), 1.24 (m, 4H). <sup>13</sup>C NMR (125 MHz, CDCl<sub>3</sub>): 177.84, 143.14, 141.78, 141.31, 134.93, 134.62, 133.69, 131.89, 131.84, 128.10, 126.14,

119.69, 118.08, 64.39, 63.85, 57.33, 47.14, 38.08, 34.44, 28.93, 28.84, 26.83, 24.83. MS (ESI):  $[M+H]^+ = 495$  (1 Cl). HRMS (ESI):  $m/z$  calcd. for  $C_{23}H_{28}ClN_2O_6S$   $[M+H]^+$ : 495.1351, found: 495.1355.

**Methyl 4-chloro-2-(2,3-dihydro-1,4-benzodioxin-5-ylsulfamoyl)benzoate (39).** To a vigorously stirred solution of 2,3-dihydro-1,4-benzodioxin-5-amine (11.50 g, 76 mmol) and *N,N*-diethylaniline (11.34 g, 76 mmol, 12.1 mL) in MeOH (100 mL), methyl 4-chloro-2-chlorosulfonylbenzoate (**9**, 19.38 g, 72 mmol) was added over a period of 10 min while cooling the reaction mixture with tap water. The suspension formed was stirred at room temperature for 1 h, then at 0–5 °C for 1 h. The crystalline product was filtered and purified by dry-column flash chromatography on a short silica gel column (thickness of stationary phase: 30 mm, eluent: heptane/DCM 1:1, DCM). After evaporation of solvents, the solid residue was triturated with MeOH, filtered and air-dried to afford **39** (22.76 g, 82%) as colorless crystals. M. p. 134–136 °C (MeOH, bright colorless crystals). IR (KBr): 3288, 1727, 1300, 1169, 1087  $cm^{-1}$ .  $^1H$  NMR (500 MHz,  $CDCl_3$ ): 8.30 (br s, 1H), 7.91 (d,  $^4J = 2.2$  Hz, 1H), 7.81 (d,  $^3J = 8.3$  Hz, 1H), 7.54 (dd,  $^4J = 2.2$  Hz,  $^3J = 8.3$  Hz, 1H), 7.15 (dd,  $^4J = 1.5$  Hz,  $^3J = 8.2$  Hz, 1H), 6.79 (~t,  $^3J = 8.2$  Hz, 1H), 6.66 (dd,  $^4J = 1.5$  Hz,  $^3J = 8.3$  Hz, 1H), 4.10 (m, 2H), 4.01 (s, 3H), 4.00 (m, 2H).  $^{13}C$  NMR (125 MHz,  $CDCl_3$ ): 166.37, 143.50, 140.97, 137.88, 135.52, 132.28, 132.10, 129.89, 128.53, 125.26, 120.82, 115.60, 114.30, 64.28, 63.90, 53.39. MS (ESI):  $[M-H]^- = 382$  (1 Cl). HRMS (ESI):  $m/z$  calcd. for  $C_{16}H_{15}ClNO_6S$   $[M+H]^+$ : 384.0303, found: 384.0299.

**Methyl 4-chloro-2-[2,3-dihydro-1,4-benzodioxin-5-yl(methyl)sulfamoyl]benzoate (40).** To a solution of compound **39** (22.26 g, 58 mmol) in DMF (100 mL), anhydrous  $K_2CO_3$  (10.42 g, 75.4 mmol) was added, and the suspension was stirred at room temperature for 15 min. To the vigorously stirred suspension iodomethane (10.70 g, 75.4 mmol, 4.7 mL) was added dropwise while cooling the reaction mixture with tap water. It was stirred at room temperature for 2 h, then water (500 mL) was added. The oily product separated, the supernatant was decanted, the oil was dissolved in DCM (100 mL), the solution was washed with water ( $2 \times 80$  mL), dried over  $Na_2SO_4$  and diluted with heptane (125 mL). Kieselgel 60 H (for TLC, 5–40  $\mu m$ , 7 g) was added and the mixture was stirred for half an hour. The adsorbent was removed by filtration, and the filtrate was evaporated in vacuo. The residue was triturated with MeOH (50 mL), the product was filtered, washed with MeOH and air-dried to afford **40** (20.00 g, 87%) as bright colorless crystals. M. p. 103–105 °C (MeOH). IR (KBr): 1745, 1477, 1350, 1283, 1117, 1079  $cm^{-1}$ .  $^1H$  NMR (500 MHz,  $CDCl_3$ ): 7.73 (d,  $^4J = 2.0$  Hz, 1H), 7.53 (dd,  $^4J = 2.1$  Hz,  $^3J = 8.2$  Hz, 1H), 7.41 (d,  $^3J = 8.2$  Hz, 1H), 6.90 (dd,  $^4J = 1.7$  Hz,  $^3J = 7.7$  Hz, 1H), 6.88 (dd,  $^4J = 1.7$  Hz,  $^3J = 8.2$  Hz, 1H), 6.82 (~t,  $^3J = 8.0$  Hz, 1H), 4.14 (m, 2H), 3.92 (m, 2H), 3.77 (s, 3H), 3.29 (s,

3H).  $^{13}\text{C}$  NMR (125 MHz,  $\text{CDCl}_3$ ): 167.48, 144.37, 141.08, 139.11, 135.63, 131.80, 131.51, 129.34, 129.15, 128.32, 123.71, 120.44, 117.65, 64.05, 63.81, 53.06, 38.21. MS (EI):  $[\text{M}]^+ = 397$  (1 Cl). HRMS (ESI):  $m/z$  calcd. for  $\text{C}_{17}\text{H}_{17}\text{ClNO}_6\text{S}$   $[\text{M}+\text{H}]^+$ : 398.0460, found: 398.0461.

**4-Chloro-2-[2,3-dihydro-1,4-benzodioxin-5-yl(methyl)sulfamoyl]benzoic acid (41).** A solution of NaOH (5.48 g, 137 mmol) in water (100 mL) was added to the suspension of compound **40** (21.80 g, 54.8 mmol) in MeOH (100 mL) and the mixture was refluxed for 1 h. The solution thus obtained was diluted with water (600 mL), aqueous HCl solution (5 m/m %, 100 mL, 105 g, 144 mmol HCl) was added while cooling the reaction mixture with tap water. The sticky oily product separated from the reaction mixture (pH 1) slowly crystallized while stirring at room temperature for 1 h. It was filtered, washed with water ( $3 \times 60$  mL), and dried over  $\text{P}_2\text{O}_5$  to afford crude **41** (20.45 g, 97%) as off-white crystals of suitable quality for next reaction step. M. p. 188–191 °C ( $\text{CH}_3\text{CN}$ , decomp.). IR (KBr): 2883, 1707, 1353, 1303, 1169, 1080, 1060, 979  $\text{cm}^{-1}$ .  $^1\text{H}$  NMR (500 MHz,  $\text{DMSO}-d_6$ ): 13.57 (br s, 1H), 7.80 (dd,  $^4J = 2.2$  Hz,  $^3J = 8.2$  Hz, 1H), 7.64 (d,  $^3J = 8.2$  Hz, 1H), 7.52 (d,  $^4J = 2.0$  Hz, 1H), 6.90 (dd,  $^4J = 1.8$  Hz,  $^3J = 8.1$  Hz, 1H), 6.83 (~t,  $^3J = 8.0$  Hz, 1H), 6.79 (dd,  $^4J = 2.0$  Hz,  $^3J = 8.1$  Hz, 1H), 4.15 (m, 2H), 3.93 (m, 2H), 3.20 (s, 3H).  $^{13}\text{C}$  NMR (125 MHz,  $\text{DMSO}-d_6$ ): 168.21, 144.50, 141.21, 137.75, 133.97, 133.44, 132.77, 129.92, 128.49, 128.35, 123.24, 120.39, 117.60, 64.23, 63.83, 38.17. MS (ESI):  $[\text{M}-\text{H}]^- = 382$  (1 Cl). HRMS (ESI):  $m/z$  calcd. for  $\text{C}_{16}\text{H}_{15}\text{ClNO}_6\text{S}$   $[\text{M}+\text{H}]^+$ : 384.0303, found: 384.0302.

**10-Chloro-13-methyl-2,3-dihydro[1,4]benzodioxino[5,6-*c*]benzo[*f*][1,2]thiazepin-7(13*H*)-one 12,12-dioxide (42).** To the thin suspension of **41** (19.80 g, 51.6 mmol) in DCM (165 mL),  $\text{PCl}_5$  (12.91 g, 62 mmol, 1.2 equiv) was added in two portions (effervescence!), and the solution obtained was refluxed for 9 h. The solution was cooled to 0–5 °C, and  $\text{SnCl}_4$  (29.60 g, 113.5 mmol, 13.3 mL, 2.2 equiv) was added. The suspension obtained was stirred at 0–5 °C for 1.5 h, then it was allowed to warm to room temperature (approx. 1 h). It was diluted with DCM (165 mL), poured onto a mixture of crushed ice (600 g) and conc. hydrochloric acid (85 mL, 100 g, 1 mol of HCl). The crystalline product separated was filtered, washed with diluted hydrochloric acid (5%,  $2 \times 50$  mL) and water ( $2 \times 50$  mL), and air-dried to give crude **42** (10.93 g of off-white solid). The two-phase filtrate was separated, the strongly acidic aqueous phase was washed with DCM (100 mL), the combined organic phases were washed with aqueous HCl solution (5 m/m %, 100 mL), dried over  $\text{Na}_2\text{SO}_4$ , evaporated in vacuo, and the residue was triturated with DIPE to afford a second crop of crude **42** (6.88 g of pale pink solid). The two crops combined were purified by dry-column flash chromatography on a short silica gel column (thickness of the stationary phase: 30 mm, eluent: DCM). After evaporation of the

solvent, the residue was triturated with CH<sub>3</sub>CN (50 mL) to give pure **42** (16.28 g, 86%) as colorless crystals. M. p. 265–267 °C (CH<sub>3</sub>CN/EtOH 1:1). IR (KBr): 1643, 1601, 1578, 1354, 1278, 1170, 1078, 996 cm<sup>-1</sup>. <sup>1</sup>H NMR (500 MHz, CDCl<sub>3</sub>+CD<sub>3</sub>OD): 8.01 (d, <sup>3</sup>J = 8.4 Hz, 1H), 7.98 (d, <sup>4</sup>J = 2.1 Hz, 1H), 7.89 (d, <sup>3</sup>J = 9.0 Hz, 1H), 7.70 (dd, <sup>4</sup>J = 2.1 Hz, <sup>3</sup>J = 8.3 Hz, 1H), 6.98 (d, <sup>3</sup>J = 9.0 Hz, 1H), 4.41 (m, 2H), 4.39 (m, 2H), 3.10 (s, 3H). <sup>13</sup>C NMR (125 MHz, CDCl<sub>3</sub>+CD<sub>3</sub>OD): 187.60, 149.34, 138.61, 138.50, 137.56, 134.08, 133.85, 133.11, 130.50, 126.43, 125.94, 124.37, 116.27, 64.33, 64.10, 37.74. HSQC (140 Hz): 8.01–133.85, 7.98–126.43, 7.89–124.37, 7.70–133.11, 6.98–116.27, 4.41–64.10, 4.39–64.33, 3.10–37.74. HMQC (140 Hz, 8 Hz): 8.01–(187.60, 138.50, 137.56), 7.98–(138.50, 133.11), 7.89–(187.60, 149.34, 130.50), 7.70–(138.50, 134.08, 126.43), 6.98–(149.34, 138.61, 125.94), 4.41–(138.61, 64.33), 4.39–(149.34, 64.10), 3.10–130.50. MS (EI): [M]<sup>+</sup> = 365 (1 Cl). HRMS (ESI): m/z calcd. for C<sub>16</sub>H<sub>13</sub>ClNO<sub>5</sub>S [M+H]<sup>+</sup>: 366.0197, found: 366.0200.

**10-Chloro-13-methyl-2,3,7,13-tetrahydro[1,4]benzodioxino[5,6-*c*]benzo[*f*][1,2]thiazepin-7-ol 12,12-dioxide (43).** To a suspension of **42** (5.49 g, 15 mmol) in DMF (30 mL) and EtOH (30 mL), NaBH<sub>4</sub> (1.135 g, 30 mmol) was added, and the reaction mixture was stirred at room temperature for 4.5 h. Water (300 mL) was added dropwise over 30 min. The separated product was filtered, washed with water and Et<sub>2</sub>O, and air-dried to give TLC pure crude **43** (5.32 g, 96%) as colorless crystals. M. p. decomp. from 208 °C (CH<sub>3</sub>CN/EtOH 1:1). IR (KBr): 3484, 1493, 1304, 1070, 984 cm<sup>-1</sup>. This compound is a 6:4 mixture of two conformers in DMSO-*d*<sub>6</sub> solution at 25 °C. <sup>1</sup>H NMR (500 MHz, DMSO-*d*<sub>6</sub>): 7.92 (m, 0.6H), 7.80–7.65 (m, 2.2H), 7.05–6.98 (d, 1H), 6.96–6.86 (m, 1H), 6.57 (br s, 0.6H), 6.24 (br s, 0.4H), 6.18 (br s, 0.6H), 5.73 (br s, 0.4H), 4.40–4.20 (m, 4H), 3.40–3.20 (m, 3H, overlapped with water signal of DMSO-*d*<sub>6</sub>). <sup>13</sup>C NMR (125 MHz, DMSO-*d*<sub>6</sub>): 144.49, 143.49, 141.62, 140.83, 140.00, 138.14, 137.42, 134.06, 133.83, 133.45, 132.53, 132.29, 131.98, 127.06, 126.65 (126.60, shoulder), 122.57, 121.16, 117.54, 116.68, 115.94, 75.41, 65.97, 64.58, 64.08, 40.30, 40.13, 39.96, 39.79, 38.90, 36.02. MS (EI): [M]<sup>+</sup>: 367 (1 Cl). HRMS (ESI): m/z calcd. for C<sub>16</sub>H<sub>14</sub>ClNNaO<sub>5</sub>S [M+Na]<sup>+</sup>: 390.0173, found: 390.0170.

**7,10-Dichloro-13-methyl-2,3,7,13-tetrahydro[1,4]benzodioxino[5,6-*c*]benzo[*f*][1,2]thiazepine 12,12-dioxide (44).** To a vigorously stirred suspension of **43** (5.74 g, 15.6 mmol) in DCM (250 mL), SOCl<sub>2</sub> (7.43 g, 62.4 mmol, 4.5 mL, 4 equiv) was added dropwise at room temperature. The suspension was stirred at room temperature for 2 h (no solution was obtained). To the suspension hexane (500 mL) was added, the product was filtered, washed with hexane (2 × 30 mL) and dried in vacuo to give crude **44** (5.65 g, 94%). M. p. decomp. from 250 °C. The compound is of suitable quality for the next step. IR (KBr): 1504,

1477, 1336, 1319, 1160, 670  $\text{cm}^{-1}$ . No NMR spectra of **44** could be recorded due to the extremely low solubility of this compound in the usual NMR solvents and their mixtures as well.

**10-Chloro-*N*,13-dimethyl-2,3,7,13-tetrahydro[1,4]benzodioxino[5,6-*c*]benzo[*f*][1,2]thiazepin-7-amine 12,12-dioxide (45a).** To the cold solution of methylamine (0.62 g, 20 mmol) in dioxane (15 mL) crude **44** (1.545 g, 4 mmol) was added, and the suspension obtained was stirred at 5–10 °C for 2 h and at room temperature for 1 h. To the thin suspension water (50 mL) was added dropwise, the product precipitated was filtered, washed with water (2 × 5 mL), air-dried and purified by dry-column flash chromatography on a short silica gel column (thickness of stationary phase: 25 mm, eluent: DCM, DCM/MeOH 100:1, 100:2). After evaporation of solvents, the solid residue was triturated with  $\text{CH}_3\text{CN}$  (5 mL) to afford **45a** (1.30 g, 85%) as colorless crystals. M. p. 187–189 °C ( $\text{CH}_3\text{CN}$ ). IR (KBr): 3323, 1498, 1327, 1157, 1070  $\text{cm}^{-1}$ . This compound is a 16:9 mixture of two conformers in  $\text{DMSO-}d_6$  solution at 25 °C. At elevated temperature (352 K) the signals of the two species coalesced.  $^1\text{H}$  NMR (500 MHz,  $\text{CDCl}_3$ ): 7.77–7.64 (m, 2.2H), 7.58 (d,  $^3J = 8.4$  Hz, 0.64H), 6.93–6.86 (m, 2H), 5.12 (d,  $^3J = 8.4$  Hz, 0.35H), 4.67 (s, 0.63H), 4.40–4.20 (m, 4H), 3.37 (s, 1.9H), 3.24 (s, 1.06H), 3.01 (m, 0.4H), 2.33 (d,  $^3J = 4.4$  Hz, 1.1H), 2.28 (br s, 0.64H), 2.09 (br s, 2H).  $^{13}\text{C}$  NMR (125 MHz,  $\text{CDCl}_3$ ): (33 signals) 144.42, 143.28, 143.20, 142.03, 141.41, 140.39, 138.77, 136.87, 134.65, 133.52, 133.31, 132.27, 132.11, 131.72, 128.81, 127.36, 126.51, 126.13, 125.01, 122.58, 117.81, 117.23, 116.79, 70.22, 64.53, 64.51, 64.07, 64.03, 60.40, 38.41, 36.49, 34.90, 34.59. MS (ESI):  $[\text{M}+\text{H}]^+ = 381$  (1 Cl). HRMS (ESI):  $m/z$  calcd. for  $\text{C}_{17}\text{H}_{18}\text{ClN}_2\text{O}_4\text{S}$   $[\text{M}+\text{H}]^+$ : 381.0670, found: 381.0668.

**10-Chloro-13-methyl-7-pyrrolidin-1-yl-2,3,7,13-tetrahydro[1,4]benzodioxino[5,6-*c*]benzo[*f*][1,2]thiazepine 12,12-dioxide (45b).** To the solution of pyrrolidine (0.85 g, 12 mmol, 1.0 mL) in  $\text{CH}_3\text{CN}$  (30 mL) crude **44** (1.55 g, 4 mmol) was added. The solution obtained was stirred at room temperature for 1 h. Water (150 mL) was added dropwise, the product separated was filtered, washed with water (3 × 5 mL), air-dried and purified by dry-column flash chromatography on a short silica gel column (thickness of stationary phase: 25 mm, eluent: DCM, DCM/MeOH 100:1). After evaporation of solvents, the residue was triturated with  $\text{Et}_2\text{O}$  (5 mL) to afford **45b** (1.24 g, 74%) as colorless crystals. M. p. 189–191 °C ( $\text{CH}_3\text{CN}$ ). IR (KBr): 2937, 1496, 1306, 1153, 1069  $\text{cm}^{-1}$ .  $^1\text{H}$  NMR (500 MHz,  $\text{CDCl}_3$ ): 7.94 (d,  $^4J = 2.2$  Hz, 1H), 7.35 (dd,  $^4J = 2.2$  Hz,  $^3J = 8.3$  Hz, 1H), 7.29 (d,  $^3J = 8.3$  Hz, 1H), 6.79 (d,  $^3J = 8.4$  Hz, 1H), 6.73 (d,  $^3J = 8.6$  Hz, 1H), 4.37 (m, 1H), 4.35 (m, 1H), 4.28 (m, 2H), 4.04 (s, 1H), 3.42 (s, 3H), 2.21 (m, 2H), 2.14 (m, 2H), 1.67 (m, 4H).  $^{13}\text{C}$  NMR (125 MHz,  $\text{CDCl}_3$ ): 144.58,

143.45, 142.35, 135.64, 134.82, 134.77, 133.05, 130.88, 128.09, 125.66, 121.29, 117.12, 76.53, 64.48, 64.11, 53.65 (2C), 38.11, 23.16 (2C). MS (ESI):  $[M+H]^+ = 421$  (1 Cl). HRMS (ESI):  $m/z$  calcd. for  $C_{20}H_{22}ClN_2O_4S$   $[M+H]^+$ : 421.0983, found: 421.0983.

**1-(10-Chloro-13-methyl-12,12-dioxido-2,3,7,13-tetrahydro[1,4]benzodioxino[5,6-c]benzo[f][1,2]thiazepin-7-yl)piperidine-4-carboxamide (45c).** To the solution of piperidine-4-carboxamide (isonipecotamide, 1.13 g, 8.8 mmol) in  $CH_3CN$  (140 mL) crude **44** (1.545 g, 4 mmol) was added. The suspension obtained was stirred at room temperature for 1 h. Water (300 mL) was added dropwise, the product separated was collected by filtration, washed with water ( $2 \times 10$  mL), air-dried and purified by dry-column flash chromatography on a short silica gel column (thickness of stationary phase: 25 mm, eluent: DCM/MeOH 100:3). After evaporation of solvents, the solid residue was triturated with  $CH_3CN$  (15 mL) to afford **45c** (1.60 g, 84%) as colorless crystals. M. p. decomp. from 272 °C ( $CH_3CN$ ). IR (KBr): 3419, 3198, 1682, 1494, 1307, 1151  $cm^{-1}$ .  $^1H$  NMR (500 MHz,  $DMSO-d_6$ ): 7.77 (d,  $^4J = 2.2$  Hz, 1H), 7.64 (dd,  $^4J = 2.2$  Hz,  $J_2 = 8.3$  Hz, 1H), 7.56 (d,  $^3J = 8.4$  Hz, 1H), 7.20 (br s, 1H), 6.88 (d,  $^3J = 8.4$  Hz, 1H), 6.86 (d,  $^3J = 8.4$  Hz, 1H), 6.72 (br s, 1H), 4.39 (m, 1H), 4.31 (m, 2H), 4.26 (s, 1H), 4.25 (m, 1H), 3.37 (s, 3H), 2.50 (m, 1H), 2.28 (m, 1H), 2.04 (m, 1H), 1.82 (m, 2H), 1.59 (m, 2H), 1.43 (m, 2H).  $^{13}C$  NMR (125 MHz,  $DMSO-d_6$ ): 176.52, 144.54, 143.44, 142.54, 135.11, 135.04, 133.95, 133.88, 131.42, 127.31, 125.04, 122.28, 117.11, 75.35, 64.52, 64.07, 52.14, 51.82, 41.57, 38.70, 28.85, 28.38. MS (ESI):  $[M+H]^+ = 478$  (1 Cl). HRMS (ESI):  $m/z$  calcd. for  $C_{22}H_{25}ClN_3O_5S$   $[M+H]^+$ : 478.1198, found: 478.1201.

**10-Chloro-7-methoxy-13-methyl-2,3,7,13-tetrahydro[1,4]benzodioxino[5,6-c]benzo[f][1,2]thiazepine 12,12-dioxide (46).** To a suspension of crude **44** (0.309 g, 0.8 mmol) in DCM (3 mL) MeOH (3 mL) was added and the solution obtained in 5 min was stirred at room temperature for further 40 min. The solution was evaporated in vacuo, the residue was subjected to dry-column flash chromatography on a short silica gel column (thickness of stationary phase: 25 mm, eluent: heptane/DCM 1:2, DCM). After evaporation of solvents, the solid residue was triturated with  $Et_2O$  to afford **46** (0.233 g, 76%) as colorless crystals. M. p. decomp. from 185 °C (MeOH). IR (KBr): 2937, 1493, 1319, 1302, 1074, 982  $cm^{-1}$ . This compound is a 6:4 mixture of two conformers in  $CDCl_3$  solution at 25 °C.  $^1H$  NMR (500 MHz,  $CDCl_3$ ): 7.97 (br s, 0.40H), 7.87 (br s, 0.32H), 7.71 (m, 0.43H), 7.48–7.35 (m, 1.5H), 6.85 (m, 2H), 5.75 (br s, 0.43H), 5.00 (br s, 0.55H), 4.42–4.25 (m, 4H), 3.58 (br s, 1.33H), 3.47 (br s, 1.33H), 3.37 (br s, 1.67H), 3.22 (br s, 1.67H).  $^{13}C$  NMR (125 MHz,  $CDCl_3$ ): (31 signals) 145.32, 143.88, 142.60, 142.31, 142.20, 139.96, 137.49, 135.52, 135.30, 133.88, 133.39, 133.26, 131.74, 131.62, 131.13, 128.01, 127.89, 126.21, 125.43, 123.09, 122.14, 118.00,



117.00, 115.42, 87.33, 64.47, 64.11, 58.46, 56.80, 38.31, 35.69. MS (EI):  $[M]^+ = 381$  (1 Cl). HRMS (ESI):  $m/z$  calcd. for  $C_{17}H_{20}ClN_2O_5S$   $[M+NH_4]^+$ : 399.0776, found: 399.0775.

**Methyl 2-[(2,3-dihydro-1,4-benzodioxin-6-ylsulfonyl)amino]benzoate (48).** To the solution of 2,3-dihydro-1,4-benzodioxine-6-sulfonyl chloride (**47**, 23.47 g, 100 mmol) in pyridine (100 mL) methyl anthranilate (13.61 g, 90 mmol, 11.6 mL) was added at 0–5 °C, and the reaction mixture (suspension after 10 min) was stirred at 0–5 °C for 4 h, then at room temperature for 13 h. Water (600 mL) was added dropwise, the product was filtered, washed with water (3 × 80 mL) to give crude **48** (29.78 g, 95%) as colorless crystals. M. p. 158–160 °C (MeOH). IR (KBr): 3151, 1690, 1499, 1286, 1254, 1154, 1085  $cm^{-1}$ .  $^1H$  NMR (500 MHz,  $CDCl_3$ ): 10.62 (br s, 1H), 7.92 (m, 1H), 7.66 (m, 1H), 7.45 (m, 1H), 7.38 (d,  $^4J = 2.2$  Hz, 1H), 7.34 (dd,  $^4J = 2.3$  Hz,  $^3J = 8.5$  Hz, 1H), 7.03 (m, 1H), 6.86 (d,  $^3J = 8.5$  Hz, 1H), 4.26 (m, 2H), 4.23 (m, 2H), 3.88 (s, 3H).  $^{13}C$  NMR (125 MHz,  $CDCl_3$ ): 168.25, 147.63, 143.40, 140.48, 134.45, 131.72, 131.09, 122.65, 120.96, 118.71, 117.60, 116.86, 115.67, 64.43, 64.03, 52.41. MS (EI):  $[M]^+ = 349$ . HRMS (ESI):  $m/z$  calcd. for  $C_{16}H_{16}NO_6S$   $[M+H]^+$ : 350.0693, found: 350.0698.

**Methyl 2-[(2,3-dihydro-1,4-benzodioxin-6-ylsulfonyl)(methyl)amino]benzoate (49).**

Method A: To a suspension of compound **48** (29.70 g, 85 mmol) in DMF (85 mL), anhydrous  $K_2CO_3$  (15.27 g, 110.5 mmol, 1.3 equiv) was added, and the suspension was stirred at room temperature for 15 min. Iodomethane (15.68 g, 110.5 mmol, 6.9 mL, 1.3 equiv) was added dropwise while cooling the reaction mixture with tap water. The suspension was stirred at room temperature for 22 h. Water (425 mL) was added, the product precipitated was filtered, washed with water, and air-dried to afford crude **49** (30.73 g, 99%) as off-white crystals. The product was of suitable quality for the next reaction step. Method B: To the ice-cooled solution of 2,3-dihydro-1,4-benzodioxine-6-sulfonyl chloride (**47**, 2.35 g, 10 mmol) in abs. pyridine (10 mL) methyl *N*-methylantranilate (1.65 g, 10 mmol, 1.47 mL) was added dropwise. The reaction mixture was stirred at 0–5 °C for 2 h, then at room temperature for 17 h (overnight). The suspension obtained was added to an aqueous HCl solution (5 m/m %, 100 mL). The oily product was separated, DCM (50 mL) was added, the phases were separated, the aqueous phase was washed with DCM (40 mL), the combined organic phases were washed with aqueous HCl solution (5 m/m %, 20 mL), dried over  $Na_2SO_4$ , and evaporated in vacuo. The residue was purified by dry-column flash chromatography on a short silica gel column (thickness of stationary phase: 30 mm, eluent: heptane/DCM 1:1, DCM, DCM/MeOH 100:1). After evaporation of solvents, the oily residue was triturated with MeOH to afford **49** (2.60 g, 71%) as colorless crystals. M. p. 96–98 °C (MeOH). IR (KBr): 1734, 1496, 1338, 1290, 1255, 1064

cm<sup>-1</sup>. <sup>1</sup>H NMR (500 MHz, CDCl<sub>3</sub>): 7.83 (dd, <sup>4</sup>J = 1.8 Hz, <sup>3</sup>J = 7.7 Hz, 1H), 7.43 (m, 1H), 7.37 (m, 1H), 7.21 (d, <sup>4</sup>J = 2.2 Hz, 1H), 7.11 (dd, <sup>4</sup>J = 2.2 Hz, <sup>3</sup>J = 8.5 Hz, 1H), 6.98 (dd, <sup>4</sup>J = 1.3 Hz, <sup>3</sup>J = 7.7 Hz, 1H), 6.90 (d, <sup>3</sup>J = 8.6 Hz, 1H), 4.31 (m, 2H), 4.29 (m, 2H), 3.88 (s, 3H), 3.25 (s, 3H). <sup>13</sup>C NMR (150 MHz, CDCl<sub>3</sub>): 166.87, 147.27, 142.32, 140.15, 132.22, 132.12, 130.97, 128.57, 128.02, 121.36, 117.41, 117.16, 64.49, 64.11, 52.36, 38.79. MS (EI): [M]<sup>+</sup> = 363. HRMS (ESI): m/z calcd. for C<sub>17</sub>H<sub>18</sub>NO<sub>6</sub>S [M+H]<sup>+</sup>: 364.0849, found: 364.0850.

**2-[(2,3-Dihydro-1,4-benzodioxin-6-ylsulfonyl)(methylamino)benzoic acid (50).** A solution of NaOH (8.46 g, 211.5 mmol) in water (140 mL) was added to the suspension of crude **49** (30.71 g, 84.5 mmol) in MeOH (140 mL) and the mixture was refluxed for 1 h. The solution thus obtained was diluted with water (700 mL), aqueous HCl solution (5 m/m %, 200 mL, 210 g, 288 mmol HCl) was added over 20 min while cooling the reaction mixture with ice water. The sticky oily product separated slowly crystallized while stirring at room temperature for 1 h. It was collected by filtration, washed with water (3 × 60 mL) and dried in vacuo over P<sub>2</sub>O<sub>5</sub> to afford crude **50** (29.01 g, 95%) as colorless crystals. M. p. 171–173 °C (CH<sub>3</sub>CN, decomp.). The quality of the dried product was suitable for the next reaction step. IR (KBr): 1679, 1496, 1346, 1290, 1062 cm<sup>-1</sup>. <sup>1</sup>H NMR (600 MHz, DMSO-*d*<sub>6</sub>): 12.94 (br s, 1H), 7.74 (m, 1H), 7.48 (m, 1H), 7.44 (m, 1H), 7.04 (m, 1H), 7.04 (m, 1H), 7.03 (m, 1H), 6.91 (m, 1H), 4.35 (m, 2H), 4.31 (m, 2H), 3.14 (s, 3H). <sup>13</sup>C NMR (150 MHz, DMSO-*d*<sub>6</sub>): 167.62, 147.54, 143.50, 139.65, 133.66, 132.09, 130.43, 130.35, 128.35, 128.29, 121.13, 117.81, 116.44, 64.64, 64.25, 38.87. COSY: 7.74–7.44–7.48–6.91, 7.04–7.04–7.03, 4.35–4.31. HSQC (140 Hz): 7.74–130.43, 7.48–132.09, 7.44–128.35, 7.04–121.13, 7.04–117.81, 7.03–116.44, 6.91–128.29, 4.35–64.64, 4.31–64.25, 3.14–38.87. HMBC (8 Hz, 140 Hz): 7.74–(167.62, 139.65, 132.09), 7.48–(139.65, 130.43), 7.44–(133.66, 128.29), 7.04–(147.54, 116.44), 7.04–(143.50, 130.35), 7.03–(147.54, 121.13), 6.91–(133.66, 128.35), 4.35–147.54, 4.31–143.50, 3.14–139.65. MS (EI): [M]<sup>+</sup> = 349. HRMS (ESI): m/z calcd. for C<sub>16</sub>H<sub>16</sub>NO<sub>6</sub>S [M+H]<sup>+</sup>: 350.0693, found: 350.0694.

**7-Methyl-2,3-dihydrobenzo[*c*][1,4]benzodioxino[6,7-*f*][1,2]thiazepin-12(7*H*)-one 6,6-dioxide (51).** To the suspension of **50** (17.47 g, 50 mmol) in DCM (250 mL), SOCl<sub>2</sub> (8.93 g, 75 mmol, 5.5 mL) was added and the reaction mixture was refluxed for 8.5 h. The solution obtained was cooled to 0–5 °C, and anhydrous AlCl<sub>3</sub> (10.00 g, 75 mmol) was added. The solution was stirred at 0–5 °C for 1.5 h, then it was refluxed for 3 h. The brown solution was poured onto a mixture of crushed ice (300 g) and diluted aqueous hydrochloric acid (5 m/m %, 100 mL). After the ice melted the phases were separated, the aqueous phase was washed with DCM (100 mL), the combined organic phases were washed with water (100 mL), dried over Na<sub>2</sub>SO<sub>4</sub>, and evaporated in vacuo. The residue was subjected to dry-column flash

chromatography on a short silica gel column (thickness of the stationary phase: 30 mm, eluent: heptane/DCM 2:1, 1:1, 1:2, DCM, DCM/MeOH 100:1, 100:2). After evaporation of the solvents, the solid residue was triturated with Et<sub>2</sub>O (20 mL) to give pure **51** (4.26 g, 26%) as pale yellow crystals. M. p. 194–196 °C (CH<sub>3</sub>CN). IR (KBr): 1648, 1350, 1299, 1159, 1066, 894 cm<sup>-1</sup>. <sup>1</sup>H NMR (500 MHz, CDCl<sub>3</sub>): 8.29 (m, 1H), 7.61 (m, 1H), 7.55 (s, 1H), 7.48 (s, 1H), 7.36 (m, 1H), 7.34 (m, 1H), 4.36 (m, 2H), 4.34 (m, 2H), 3.30 (s, 3H). <sup>13</sup>C NMR (125 MHz, CDCl<sub>3</sub>): 188.81, 147.09, 146.39, 141.32, 134.49, 132.13, 131.70, 130.42, 129.60, 126.18, 125.32, 121.32, 115.48, 64.63, 64.36, 39.19. NOE: 3.30–(7.48, 7.34). COSY: 8.29–7.36–7.61–7.34, 4.36–4.34. HSQC (140 Hz): 8.29–132.13, 7.61–134.49, 7.55–121.32, 7.48–115.48, 7.36–126.18, 7.34–125.32, 4.36–64.36, 4.34–64.63, 3.30–39.19. HMQC (140 Hz, 8 Hz): 8.29–(188.81, 141.32, 134.49), 7.61–(141.32, 132.13), 7.55–(188.81, 146.39, 130.42), 7.48–(147.09, 129.60), 7.36–(131.70, 125.32), 7.34–(131.70, 126.18), 4.36–(146.39, 64.63), 4.34–(147.09, 64.36), 3.30–141.32. MS (EI): [M]<sup>+</sup> = 331. HRMS (ESI): m/z calcd. for C<sub>16</sub>H<sub>14</sub>NO<sub>5</sub>S [M+H]<sup>+</sup>: 332.0587, found: 332.0582.

**7-Methyl-2,3,7,12-tetrahydrobenzo[*c*][1,4]benzodioxino[6,7-*f*][1,2]thiazepin-12-ol 6,6-dioxide (52).** To a suspension of **51** (4.10 g, 12.4 mmol) in DMF (25 mL) and abs. EtOH (25 mL), NaBH<sub>4</sub> (0.91 g, 24 mmol) was added, and the reaction mixture was stirred at room temperature for 4 h. To the solution obtained water (400 mL) was added dropwise. The product separated was filtered, washed with water, air-dried and purified by dry-column flash chromatography on a short silica gel column (thickness of stationary phase: 25 mm, eluent: DCM, DCM/MeOH 200:1). After evaporation of solvents, the residue was triturated with DIPE (30 mL) to afford **52** (3.86 g, 93%) as colorless crystals. M. p. decomp. from 180 °C. IR (KBr): 3485, 1570, 1493, 1291, 1134, 1061 cm<sup>-1</sup>. <sup>1</sup>H NMR (500 MHz, DMSO-*d*<sub>6</sub>): 7.58 (m, 1H), 7.46 (m, 1H), 7.36 (m, 1H), 7.34 (m, 1H), 7.28 (d, <sup>4</sup>*J* = 0.9 Hz, 1H), 7.19 (s, 1H), 6.44 (d, <sup>3</sup>*J* = 5.1 Hz, 1H), 6.18 (d, <sup>3</sup>*J* = 5.1 Hz, 1H), 4.30 (m, 2H), 4.27 (m, 2H), 3.32 (s, 3H). <sup>13</sup>C NMR (125 MHz, DMSO-*d*<sub>6</sub>): 146.54, 143.21, 142.67, 136.92, 134.90, 129.73, 128.71, 128.04, 127.55, 125.62, 116.13, 114.37, 67.70, 64.75, 64.36, 37.07. MS (EI): [M]<sup>+</sup> = 333. HRMS (ESI): m/z calcd. for C<sub>16</sub>H<sub>16</sub>NO<sub>5</sub>S [M+H]<sup>+</sup>: 334.0744, found: 334.0741.

**12-Chloro-7-methyl-2,3,7,12-tetrahydrobenzo[*c*][1,4]benzodioxino[6,7-*f*][1,2]thiazepine 6,6-dioxide (53).** To a vigorously stirred suspension of **52** (3.50 g, 10.5 mmol) in DCM (25 mL), SOCl<sub>2</sub> (1.50 g, 12.6 mmol, 0.92 mL) was added dropwise at room temperature. The solution obtained turned to a thick suspension. It was stirred at room temperature for 2 h, then hexane (50 mL) was added, the product was filtered, washed with hexane (2 × 10 mL) and dried in vacuo to give crude **53** (3.50 g, 95%) as colorless crystals. M. p. decomp. from 175 °C. The

product was suitable for the next reaction step without further purification. IR (KBr): 1499, 1325, 1299, 1134, 1064, 926, 890  $\text{cm}^{-1}$ .  $^1\text{H}$  NMR (500 MHz,  $\text{CDCl}_3$ ): 7.51 (s, 1H), 7.50 (m, 1H), 7.47 (m, 1H), 7.39 (m, 1H), 7.32 (m, 1H), 7.03 (s, 1H), 6.06 (s, 1H), 4.29 (m, 4H), 3.54 (s, 3H).  $^{13}\text{C}$  NMR (125 MHz,  $\text{CDCl}_3$ ): 146.22, 144.50, 139.38, 137.89, 133.03, 131.16, 129.74, 129.21, 128.57, 128.49, 119.78, 117.25, 64.56, 64.36, 64.15, 38.90. MS (ESI):  $[\text{M}-\text{Cl}-\text{OH}-\text{H}]^- = 332$ ,  $[\text{M}+\text{CH}_3\text{CN}+\text{Na}]^+ = 397$  (after a rapid hydrolysis of **53**, compound **52** was detected). HRMS (TOF MS EI):  $m/z$  calcd. for  $[\text{C}_{16}\text{H}_{14}\text{ClNO}_4\text{S}]^+$ : 351.0332, found: 351.0331.

***N*,7-Dimethyl-2,3,7,12-tetrahydrobenzo[*c*][1,4]benzodioxino[6,7-*f*][1,2]thiazepin-12-amine 6,6-dioxide (54a)**. To the solution of methylamine (0.78 g, 25 mmol) in dioxane (23 mL) crude **53** (1.76 g, 5 mmol) was added, and the suspension obtained was stirred at room temperature for 1.5 h. Water (75 mL) was added dropwise, the product separated was filtered, washed with water ( $2 \times 10$  mL), air-dried and purified by dry-column flash chromatography on a short silica gel column (thickness of stationary phase: 25 mm, eluent: DCM, DCM/MeOH 100:1). After evaporation of solvents, the residue was triturated with DIPE (10 mL), filtered and recrystallized from  $\text{CH}_3\text{CN}$  (9 mL) to afford **54a** (1.29 g, 75%) as colorless crystals. M. p. 182–184  $^\circ\text{C}$  ( $\text{CH}_3\text{CN}$ ). IR (KBr): 3362, 1573, 1494, 1287, 1066, 895, 562  $\text{cm}^{-1}$ .  $^1\text{H}$  NMR (500 MHz,  $\text{CDCl}_3$ ): 7.51 (s, 1H), 7.39 (m, 1H), 7.32 (m, 2H), 7.26 (m, 1H), 6.96 (s, 1H), 4.78 (s, 1H), 4.29 (m, 2H), 4.27 (m, 2H), 3.27 (s, 3H), 2.35 (s, 3H), 2.30 (br s, 1H).  $^{13}\text{C}$  NMR (125 MHz,  $\text{CDCl}_3$ ): 146.30, 142.65, 139.19, 138.07, 131.82, 130.47, 130.41, 128.89, 127.50, 127.48, 118.72, 118.30, 67.97, 64.61, 64.20, 38.55, 34.80. MS (ESI):  $[\text{M}+\text{H}]^+ = 347$ . HRMS (ESI):  $m/z$  calcd. for  $\text{C}_{17}\text{H}_{19}\text{N}_2\text{O}_4\text{S}$   $[\text{M}+\text{H}]^+$ : 347.1060, found: 347.1060.

**7-Methyl-12-pyrrolidin-1-yl-2,3,7,12-tetrahydrobenzo[*c*][1,4]benzodioxino[6,7-*f*][1,2]thiazepine 6,6-dioxide (54b)**. To the solution of pyrrolidine (0.78 g, 11 mmol) in  $\text{CH}_3\text{CN}$  (15 mL) crude **53** (1.76 g, 5 mmol) was added. The suspension obtained was stirred at room temperature for 1 h. Water (30 mL) was added dropwise, the product separated was filtered, washed with water ( $2 \times 5$  mL), air-dried, and purified by dry-column chromatography on a short aluminum oxide column (thickness of stationary phase: 25 mm, eluent: heptane/DCM 1:1, DCM). After evaporation of solvents, the residue was triturated with DIPE (10 mL) to afford TLC-pure **54b** (1.53 g, 79%) as colorless crystals. M. p. decomp. from 210  $^\circ\text{C}$  ( $\text{CH}_3\text{CN}$ ). IR (KBr): 1503, 1311, 1293, 1135, 1066, 562  $\text{cm}^{-1}$ .  $^1\text{H}$  NMR (500 MHz,  $\text{CDCl}_3$ ): 7.47 (s, 1H), 7.43 (m, 1H), 7.34 (m, 1H), 7.29 (m, 1H), 7.25 (m, 1H), 6.89 (s, 1H), 4.27 (m, 1H), 4.24 (m, 1H), 4.23 (m, 2H), 4.11 (s, 1H), 3.50 (s, 3H), 2.25 (m, 4H), 1.69 (m, 4H).  $^{13}\text{C}$  NMR (125 MHz,  $\text{CDCl}_3$ ): 145.36, 143.45, 142.18, 138.27, 133.73, 131.56, 130.38, 129.74, 129.51, 128.40,

119.27, 117.50, 75.80, 64.59, 64.21, 53.67 (2C), 39.44, 23.26 (2C). MS (ESI):  $[M+H]^+ = 387$ . HRMS (ESI):  $m/z$  calcd. for  $C_{20}H_{23}N_2O_4S$   $[M+H]^+$ : 387.1373, found: 387.1376.

**7-Methyl-*N*-(2-morpholin-4-ylethyl)-2,3,7,12-tetrahydrobenzo[*c*][1,4]benzodioxino[6,7-*f*][1,2]thiazepin-12-amine 6,6-dioxide (54c).** To the solution of 4-(2-aminoethyl)morpholine (1.15 g, 8.8 mmol) in  $CH_3CN$  (15 mL) crude **53** (1.41 g, 4 mmol) was added. The suspension formed was stirred at room temperature for 1.5 h. Water (50 mL) was added dropwise, and an oily product separated. Water (20 mL) and DCM (20 mL) were added, and stirring was continued for 10 min. The phases were separated, the aqueous phase was washed with DCM (20 mL), the combined organic phase was washed with water (20 mL), dried over  $Na_2SO_4$ , and evaporated in vacuo. The residue was purified by dry-column flash chromatography first on a short silica gel column (thickness of stationary phase: 25 mm, eluent: DCM, DCM/MeOH 100:1, 100:2). After evaporation of solvents, the residue was purified again by dry-column flash chromatography on a short aluminum oxide column (thickness of stationary phase: 25 mm, eluent: heptane/DCM 1:1, 1:2, DCM, DCM/MeOH 100:1). After evaporation of solvents, the residue was crystallized from  $CH_3CN$  to afford **54c** (1.31 g, 74%) as colorless crystals. M. p. 142–144 °C ( $CH_3CN$ ). IR (KBr): 3347, 1575, 1333, 1308, 1287, 1118, 1066, 896  $cm^{-1}$ .  $^1H$  NMR (500 MHz,  $CDCl_3$ ): 7.49 (s, 1H), 7.36 (m, 2H), 7.32 (m, 1H), 7.25 (m, 1H), 6.97 (s, 1H), 4.92 (s, 1H), 4.28 (m, 2H), 4.25 (m, 2H), 3.67 (m, 4H), 3.36 (s, 3H), 2.73 (br s, 1H), 2.62 (m, 2H), 2.52 (m, 1H), 2.46 (m, 1H), 2.35 (m, 4H).  $^{13}C$  NMR (125 MHz,  $CDCl_3$ ): 146.21, 142.72, 139.51, 138.84, 132.63, 130.77, 129.33, 128.84, 127.65, 127.40, 118.06, 117.86, 66.87 (2C), 65.39, 64.60, 64.16, 58.19, 53.63 (2C), 44.11, 37.95. MS (EI):  $[M]^+ = 445$ . HRMS (ESI):  $m/z$  calcd. for  $C_{22}H_{28}N_3O_5S$   $[M+H]^+$ : 446.1744, found: 446.1740.

**7-Methyl-*N*-(3-morpholin-4-ylpropyl)-2,3,7,12-tetrahydrobenzo[*c*][1,4]benzodioxino[6,7-*f*][1,2]thiazepin-12-amine 6,6-dioxide (54d).** To the solution of 4-(3-aminopropyl)morpholine (1.27 g, 8.8 mmol) in  $CH_3CN$  (15 mL) crude **53** (1.41 g, 4 mmol) was added. The solution obtained was stirred at room temperature for 1 h, then it was evaporated in vacuo. The residue was dissolved in DCM (30 mL), the solution was washed with water ( $2 \times 20$  mL), dried over  $Na_2SO_4$ , and evaporated in vacuo. The residue was purified by dry-column flash chromatography firstly on a short silica gel column (thickness of stationary phase: 25 mm, eluent: DCM, DCM/MeOH 100:1, 100:2, 100:3). After evaporation of solvents, the residue was purified again by dry-column flash chromatography on a short aluminum oxide column (thickness of stationary phase: 25 mm, eluent: heptane/DCM 1:1, DCM, DCM/MeOH 100:1). After evaporation of solvents, the residue was triturated with  $CH_3CN$  to afford **54d** (1.51 g, 82%) as colorless crystals. M. p. 149–151 °C ( $CH_3CN$ ). IR (KBr): 3354, 1574, 1493, 1333,

1060, 896, 708  $\text{cm}^{-1}$ .  $^1\text{H}$  NMR (500 MHz,  $\text{CDCl}_3$ ): 7.49 (s, 1H), 7.37 (m, 1H), 7.35 (m, 1H), 7.31 (m, 1H), 7.27 (m, 1H), 7.00 (m, 1H), 4.99 (s, 1H), 4.28 (m, 2H), 4.24 (m, 2H), 3.67 (m, 4H), 3.32 (s, 3H), 2.58 (m, 3H), 2.42 (m, 6H), 1.70 (~qn,  $^3J = 6.7$  Hz, 2H).  $^{13}\text{C}$  NMR (125 MHz,  $\text{CDCl}_3$ ): 146.32, 142.58, 139.55, 138.83, 132.92, 130.39, 129.07, 128.67, 127.53, 127.35, 118.13, 117.39, 66.88 (2C), 64.59, 64.13, 57.24, 53.71 (2C), 46.61, 37.92, 26.47. MS (ESI):  $[\text{M}+\text{H}]^+ = 460$ . HRMS (ESI):  $m/z$  calcd. for  $\text{C}_{23}\text{H}_{30}\text{N}_3\text{O}_5\text{S}$   $[\text{M}+\text{H}]^+$ : 460.1901, found: 460.1896.

**Ethyl 7-[(7-methyl-6,6-dioxido-2,3,7,12-tetrahydrobenzo[*c*][1,4]benzodioxino[6,7-*f*][1,2]thiazepin-12-yl)amino]heptanoate (54e).** To a solution of ethyl 7-aminoheptanoate (3.47 g, 20 mmol) in  $\text{CH}_3\text{CN}$  (25 mL) crude **53** (3.17 g, 9 mmol) was added which led to a slightly exothermic reaction. The solution obtained was stirred at room temperature for 1 h, then it was evaporated in vacuo. The residue was dissolved in DCM (50 mL), washed with water ( $2 \times 25$  mL), dried over  $\text{Na}_2\text{SO}_4$ , and partially evaporated in vacuo. The solution was purified by dry-column flash chromatography on a short aluminum oxide column (thickness of stationary phase: 40 mm, eluent: heptane/DCM 1:1, DCM). After evaporation of solvents in vacuo **54e** (4.16 g, 94%) was obtained as a pale yellow oil. IR (film): 2933, 1732, 1574, 1495, 1295, 1068, 895, 712  $\text{cm}^{-1}$ .  $^1\text{H}$  NMR (600 MHz,  $\text{CDCl}_3$ ): 7.50 (s, 1H), 7.36 (m, 1H), 7.34 (m, 1H), 7.32 (m, 1H), 7.26 (m, 1H), 6.95 (s, 1H), 4.91 (s, 1H), 4.29 (m, 2H), 4.27 (m, 2H), 4.11 (q,  $^3J = 7.1$  Hz, 2H), 3.31 (s, 3H), 2.48 (m, 2H), 2.27 (t,  $^3J = 7.5$  Hz, 2H), 2.06 (br s, 1H), 1.60 (m, 2H), 1.49 (m, 2H), 1.31 (m, 2H), 1.30 (m, 2H), 1.24 (t,  $^3J = 7.1$  Hz, 3H).  $^{13}\text{C}$  NMR (150 MHz,  $\text{CDCl}_3$ ): 173.77, 146.30, 142.65, 138.96 (2C), 132.57, 130.56, 129.85, 128.83, 127.60, 127.48, 118.17 (2C), 65.71, 64.60, 64.17, 60.15, 47.92, 38.27, 34.24, 29.89, 28.96, 26.92, 24.82, 14.22. COSY: 7.36–7.26–7.32–7.34, 4.29–4.27, 4.11–1.24, 2.48–1.49–1.31–1.30–1.60–2.27. HSQC (140 Hz): 7.50–118.17, 7.36–129.85, 7.34–127.48, 7.32–128.83, 7.26–127.60, 6.95–118.17, 4.91–65.71, 4.29–64.60, 4.27–64.17, 4.11–60.15, 3.31–38.27, 2.48–47.92, 2.27–34.24, 1.60–24.82, 1.49–29.89, 1.31–26.92, 1.30–28.96, 1.24–14.22. HMBC (8 Hz, 140 Hz): 7.50–(146.30, 132.57), 7.36–(138.96, 128.83), 7.34–(138.96, 127.60), 7.32–(138.96, 129.85), 7.26–(138.96, 127.48), 6.95–(142.65, 130.56), 4.91–(138.96, 132.57, 130.56, 129.85, 118.17, 47.92), 4.29–146.30, 4.27–142.65, 4.11–(173.77, 14.22), 3.31–138.96, 2.27–(173.77, 28.96, 24.82), 1.60–(173.77, 34.24, 28.96, 26.92), 1.49–(47.92, 26.92), 1.31–28.96, 1.30–26.92, 1.24–60.15. HRMS (ESI):  $m/z$  calcd. for  $\text{C}_{25}\text{H}_{33}\text{N}_2\text{O}_6\text{S}$   $[\text{M}+\text{H}]^+$ : 489.2054, found: 489.2055.

**7-[(7-Methyl-6,6-dioxido-2,3,7,12-tetrahydrobenzo[*c*][1,4]benzodioxino[6,7-*f*][1,2]thiazepin-12-yl)amino]heptanoic acid (54f).** To a solution of ester **54e** (3.91 g, 8 mmol) in EtOH (40 mL), NaOH (0.384 g, 9.6 mmol) dissolved in water (10 mL) was added at room temperature and the solution was stirred at room temperature for 20 h. Water (30 mL) was

added, and the reaction mixture was partly evaporated in vacuo to remove ethanol. The solution obtained was neutralized with aqueous HCl solution (1.00 g of cc. HCl dissolved in 9 mL of water, containing 10 mmol of HCl). DCM (50 mL) was added to the reaction mixture, after a short stirring the phases were separated, the aqueous phase was washed with DCM (50 mL), the combined organic phases were dried over Na<sub>2</sub>SO<sub>4</sub> and partially evaporated in vacuo. The solution obtained was subjected to dry-column flash chromatography on a short silica gel column (thickness of stationary phase: 25 mm, eluent: DCM, DCM/MeOH 100:2, 100:4). After evaporation of solvents the oily residue was triturated with water (40 mL) to afford **54f** (2.58 g, 70%) as a colorless amorphous solid. Melting range (glass-transition range): 80–95 °C (Kofler–Boëtius, 2 °C/min), 63–84 °C (DSC, 10 °C/min). IR (KBr): 2931, 1716, 1500, 1296, 1137, 1064 cm<sup>-1</sup>. <sup>1</sup>H NMR (500 MHz, CDCl<sub>3</sub>): 8.10 (br s, 2H), 7.49 (s, 1H), 7.47 (m, 1H), 7.34 (m, 1H), 7.30 (m, 1H), 7.24 (m, 1H), 7.07 (s, 1H), 5.23 (s, 1H), 4.28 (m, 4H), 3.21 (s, 3H), 2.55 (m, 1H), 2.41 (m, 1H), 2.20 (t, <sup>3</sup>J = 7.3 Hz, 2H), 1.54 (m, 2H), 1.48 (m, 2H), 1.25 (m, 4H). <sup>13</sup>C NMR (125 MHz, CDCl<sub>3</sub>): 178.16, 146.61, 143.19, 139.78, 134.16, 131.69, 130.39, 129.64, 128.82, 127.40, 127.14, 120.35, 118.13, 65.58, 64.51, 64.20, 46.82, 38.83, 35.16, 28.93, 28.58, 26.79, 25.12. MS (ESI): [M+H]<sup>+</sup> = 461. HRMS (ESI): m/z calcd. for C<sub>23</sub>H<sub>29</sub>N<sub>2</sub>O<sub>6</sub>S [M+H]<sup>+</sup>: 461.1741, found: 461.1739.

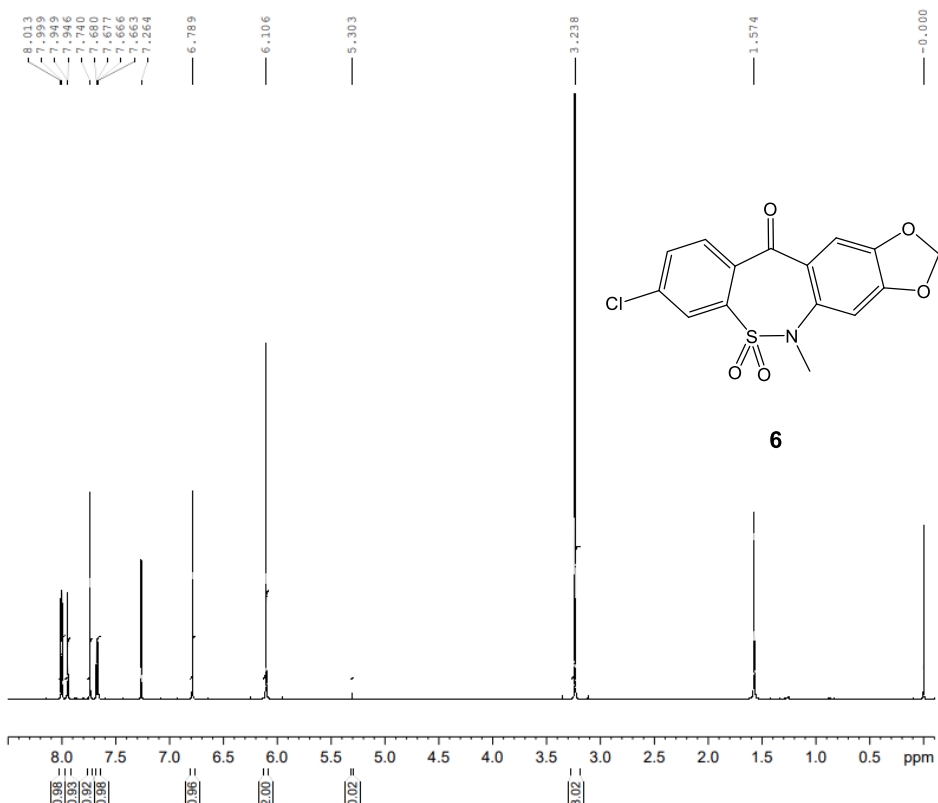

Standard 1H  
143529  
1801-BGE  
Berez Gabor  
2024.09.17. (DA)

Current Data Parameters  
NAME 143529  
EXPNO 11  
PROCNO 1

F2 - Acquisition Parameters  
Date\_ 20240918  
Time\_ 5.48 h  
INSTRUM spect  
PROBHD Z145856\_0002 (  
PULPROG zg30  
TD 65536  
SOLVENT CDC13  
NS 16  
DS 2  
SWH 12019.230 Hz  
FIDRES 0.366798 Hz  
AQ 2.7262976 sec  
RG 196.07  
DW 41.600 usec  
DE 25.00 usec  
TE 295.0 K  
D1 1.00000000 sec  
TDO 1  
SFO1 600.0037050 MHz  
NUC1 1H  
F1 11.50 usec  
PLW1 28.00000000 W

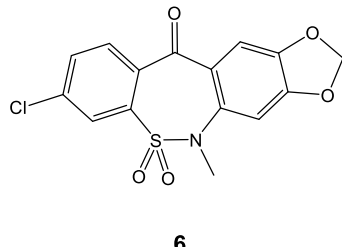

F2 - Processing parameters  
SI 65536  
SF 600.0000126 MHz  
WDW EM  
SSB 0  
LB 0.30 Hz  
GB 0  
PC 1.00

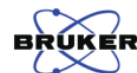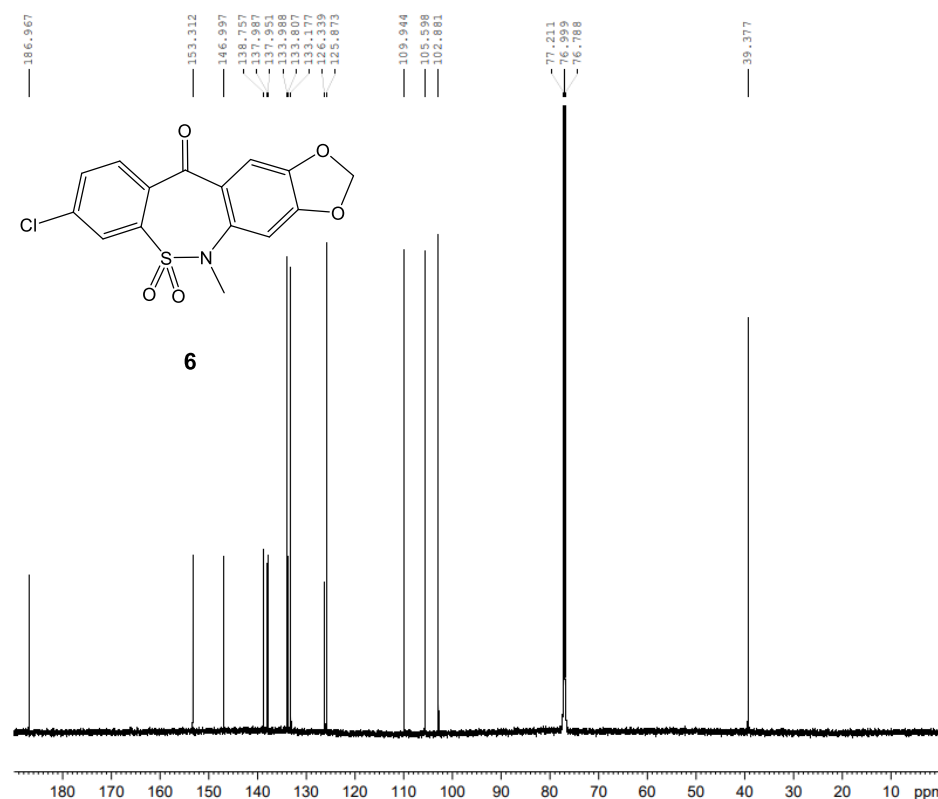

Standard 13C  
143529  
1801-BGE  
Berez Gabor  
2024.09.17. (DA)

Current Data Parameters  
NAME 143529  
EXPNO 12  
PROCNO 1

F2 - Acquisition Parameters  
Date\_ 20240918  
Time\_ 6.57 h  
INSTRUM spect  
PROBHD Z145856\_0002 (  
PULPROG zgpg30  
TD 65536  
SOLVENT CDC13  
NS 2048  
DS 4  
SWH 36231.883 Hz  
FIDRES 1.105709 Hz  
AQ 0.9043968 sec  
RG 196.07  
DW 13.800 usec  
DE 18.00 usec  
TE 295.0 K  
D1 1.00000000 sec  
D11 0.03000000 sec  
TDO 1  
SFO1 150.8852070 MHz  
NUC1 13C  
F1 9.90 usec  
PLM1 71.00000000 W  
SFO2 600.0024000 MHz  
NUC2 1H  
CPDPRG2 waltz16  
PCPD2 80.00 usec  
PLM2 32.9000153 W  
PLW12 0.70370001 W  
PLW13 0.35339001 W

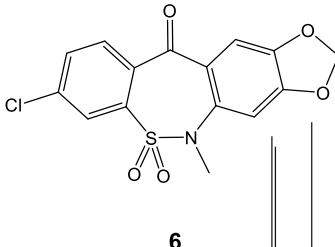

F2 - Processing parameters  
SI 131072  
SF 150.8701265 MHz  
WDW EM  
SSB 0  
LB 1.00 Hz  
GB 0  
PC 1.40

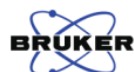



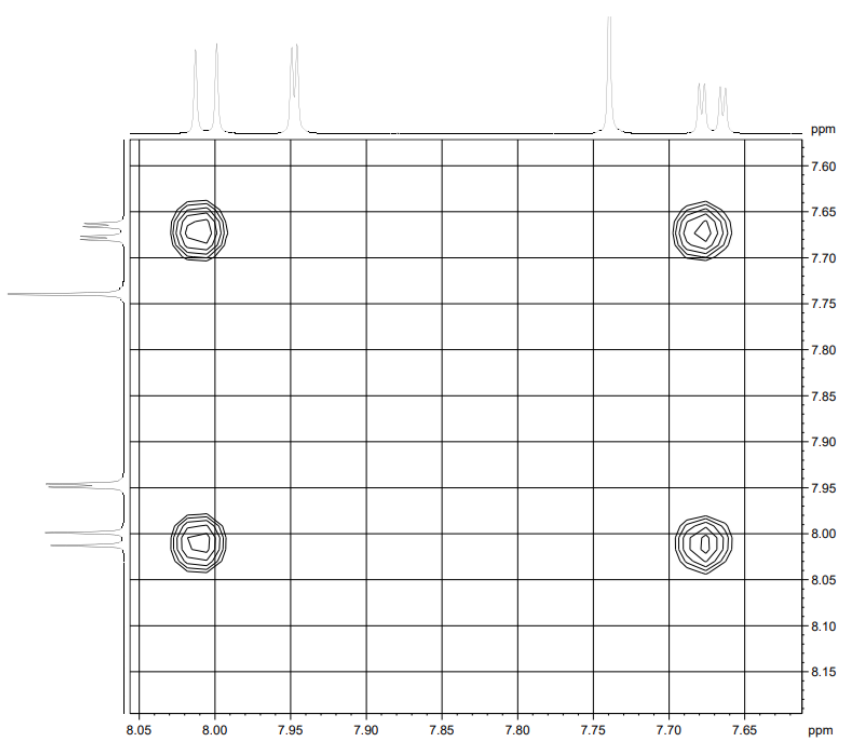

COSY  
 143529  
 1801-BGE  
 Berecz Gabor  
 2024.09.17. (DA) 6

```
Current Data Parameters
NAME      143529
EXPNO    13
PROCNO    1

F2 - Acquisition Parameters
Date_     20240917
Time      7:13
INSTRUM   spect
PROBHD    1H5MMQ1002
PULPROG   zgpg30
TD         65536
SOLVENT   CDCl3
NS         64
DS         4
SWH        7812.350 Hz
FIDRES    0.0001395 Hz
AQ         0.1107720 sec
RG         681.07
DE         68.000 usec
TE         29.00 usec
DQ         2
DC          0.0000000 sec
DI          2.0000000 sec
D1         0.0001000 sec
D11        0.0000000 sec
D12        0.0000000 sec
D13        0.0000000 sec
D14        0.0000000 sec
D15        0.0001000 sec
ED16       600.0000000 MHz
NUC1       13
P1         11.10 usec
P2         28.0000000 W
SFO1(1)    500.1361000 MHz
SFO2(1)    500.1361000 MHz
SFO1(2)    500.1361000 MHz
SFO2(2)    500.1361000 MHz
SFO3(1)    500.1361000 MHz
SFO3(2)    500.1361000 MHz
P14        1000.00 usec

F1 - Acquisition Parameters
TD         256
SFO1       600.021288 MHz
SFO2       60.021288 MHz
AQ         0.1107720 sec
RG         11.000 usec
DE         68.000 usec
TE         29.00 usec

F2 - Processing parameters
SI         32768
SF         600.0001288 MHz
WDW        EM
SSB         0 Hz
LB          0 Hz
GB          0 Hz
PC          1.40

F1 - Processing parameters
SI         32768
SF         600.021288 MHz
WDW        EM
SSB         0 Hz
LB          0 Hz
GB          0 Hz
PC          1.40
```

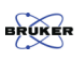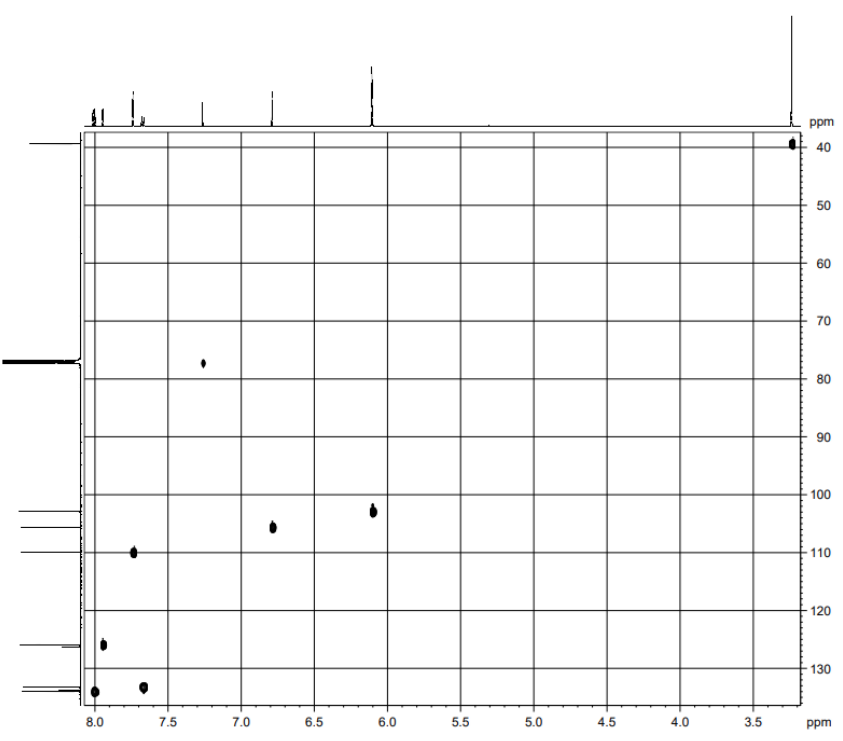

HSQC (140 Hz)  
 143529  
 1801-BGE  
 Berecz Gabor  
 2024.09.17. (DA) 6

```
Current Data Parameters
NAME      143529
EXPNO    14
PROCNO    1

F2 - Acquisition Parameters
Date_     20240917
Time      7:13
INSTRUM   spect
PROBHD    1H5MMQ1002
PULPROG   zgpg30
TD         65536
SOLVENT   CDCl3
NS         64
DS         4
SWH        7812.350 Hz
FIDRES    0.0001395 Hz
AQ         0.1107720 sec
RG         681.07
DE         68.000 usec
TE         29.00 usec
DQ         2
DC          0.0000000 sec
DI          2.0000000 sec
D1         0.0001000 sec
D11        0.0000000 sec
D12        0.0000000 sec
D13        0.0000000 sec
D14        0.0000000 sec
D15        0.0001000 sec
ED16       600.0000000 MHz
NUC1       13
P1         11.10 usec
P2         28.0000000 W
SFO1(1)    500.1361000 MHz
SFO2(1)    500.1361000 MHz
SFO1(2)    500.1361000 MHz
SFO2(2)    500.1361000 MHz
SFO3(1)    500.1361000 MHz
SFO3(2)    500.1361000 MHz
P14        1000.00 usec

F1 - Acquisition Parameters
TD         256
SFO1       600.021288 MHz
SFO2       60.021288 MHz
AQ         0.1107720 sec
RG         11.000 usec
DE         68.000 usec
TE         29.00 usec

F2 - Processing parameters
SI         32768
SF         600.0001288 MHz
WDW        EM
SSB         0 Hz
LB          0 Hz
GB          0 Hz
PC          1.40

F1 - Acquisition Parameters
TD         256
SFO1       600.021288 MHz
SFO2       60.021288 MHz
AQ         0.1107720 sec
RG         11.000 usec
DE         68.000 usec
TE         29.00 usec

F2 - Processing parameters
SI         32768
SF         600.0001288 MHz
WDW        EM
SSB         0 Hz
LB          0 Hz
GB          0 Hz
PC          1.40
```

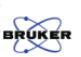

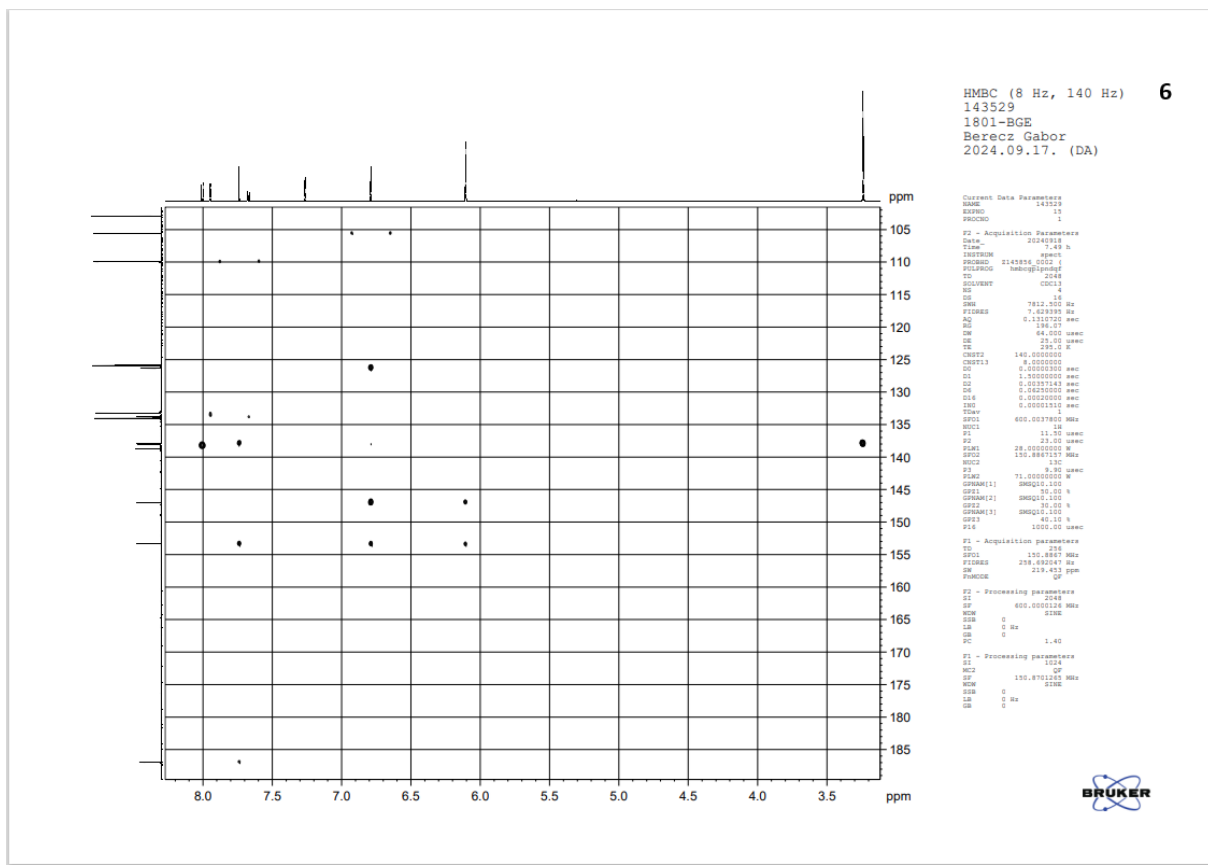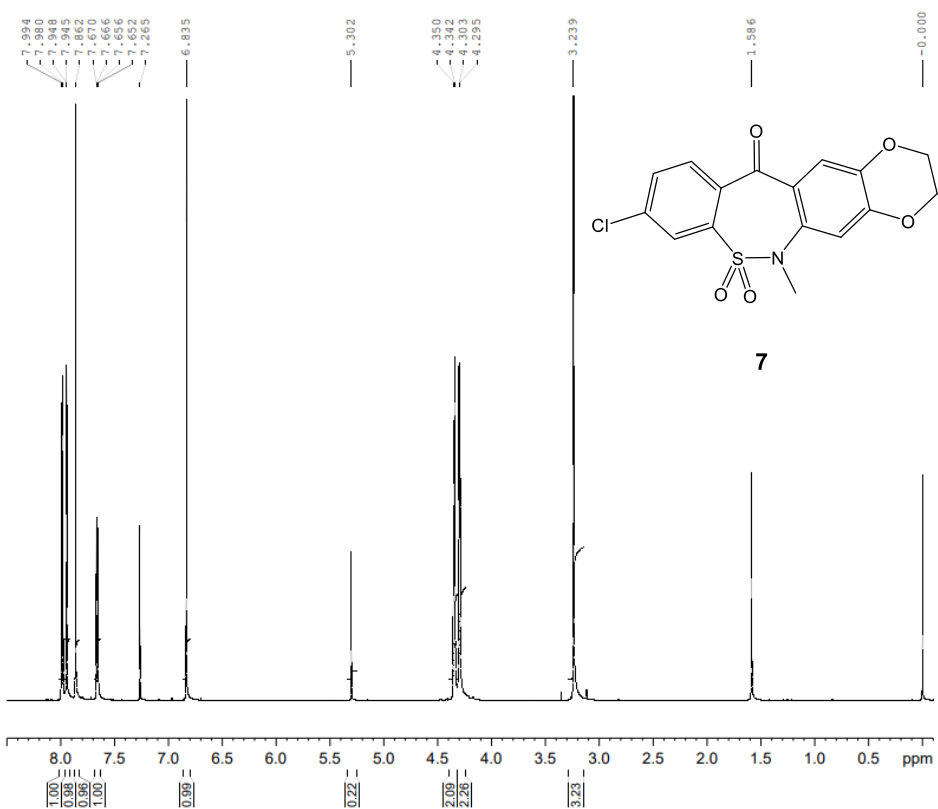

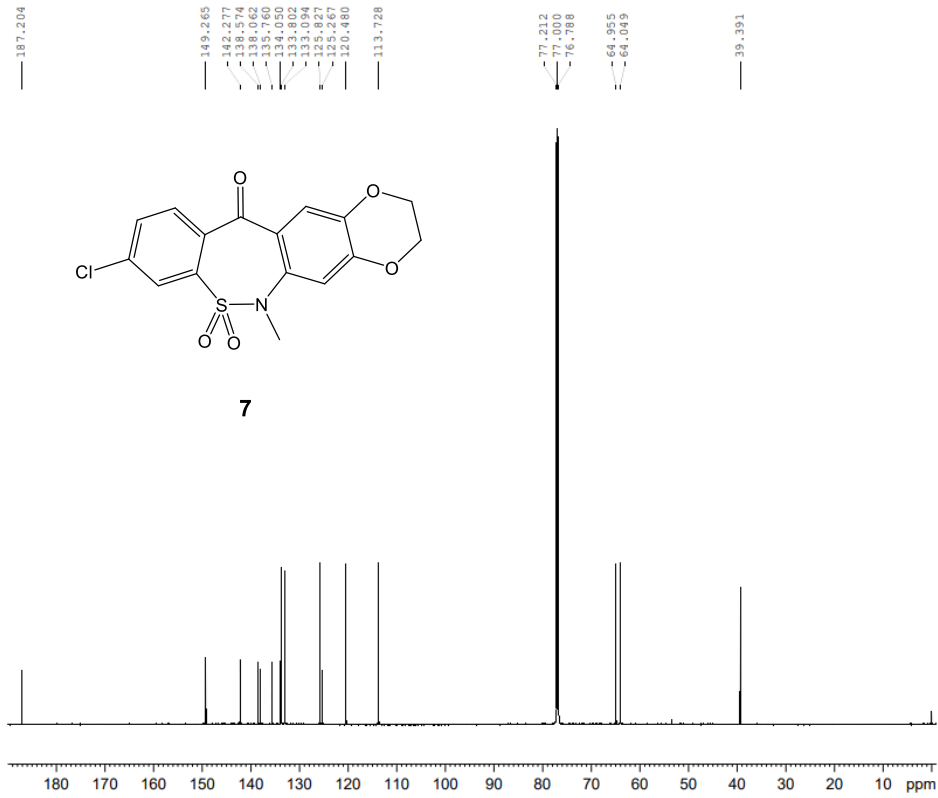

Standard 13C  
144361  
bge1721-1721-BGE\_1  
Berez Gabor  
2025.03.07. (KP)

Current Data Parameters  
NAME 144361  
EXPNO 12  
PROCNO 1

F2 - Acquisition Parameters  
Date\_ 20250308  
Time\_ 4.31 h  
INSTRUM spect  
PROBHD Z145856\_0002 ( )  
PULPROG zgpg30  
TD 65536  
SOLVENT CDCl3  
NS 2048  
DS 4  
SWH 36231.883 Hz  
FIDRES 1.105709 Hz  
AQ 0.9043968 sec  
RG 196.07  
DW 13.800 usec  
DE 18.00 usec  
TE 295.0 K  
D1 1.0000000 sec  
D11 0.0300000 sec  
TDO 1  
SFO1 150.8852070 MHz  
NUC1 13C  
P1 9.80 usec  
PLW1 72.69999695 W  
SFO2 600.0024000 MHz  
NUC2 1H  
CPDPRG2 waltz16  
PCPD2 32.50000000 W  
PLW2 32.50000000 W  
PLW12 0.70708001 W  
PLW13 0.35508999 W

F2 - Processing parameters  
SI 131072  
SF 150.8701276 MHz  
WDW EM  
SSB 0  
LB 1.00 Hz  
GB 0  
PC 1.40

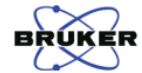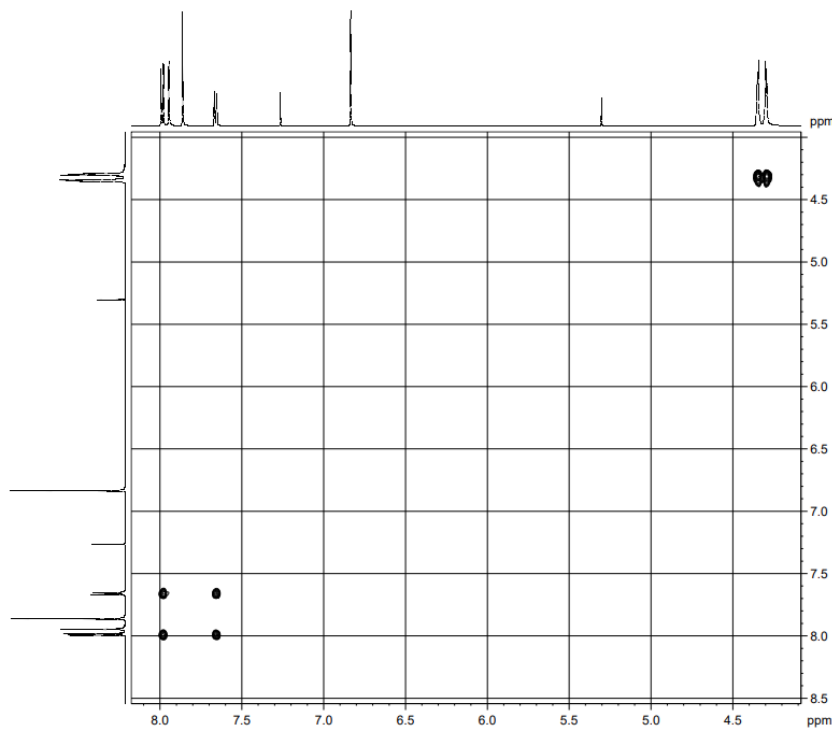

COSY  
144361  
bge1721-1721-BGE\_1  
Berez Gabor  
2025.03.07. (KP)

Current Data Parameters  
NAME 144361  
EXPNO 12  
PROCNO 1

F2 - Acquisition Parameters  
Date\_ 20250308  
Time\_ 4.31 h  
INSTRUM spect  
PROBHD Z145856\_0002 ( )  
PULPROG zgpg30  
TD 65536  
SOLVENT CDCl3  
NS 2048  
DS 4  
SWH 36231.883 Hz  
FIDRES 1.105709 Hz  
AQ 0.9043968 sec  
RG 196.07  
DW 13.800 usec  
DE 18.00 usec  
TE 295.0 K  
D1 1.0000000 sec  
D11 0.0300000 sec  
TDO 1  
SFO1 150.8852070 MHz  
NUC1 13C  
P1 9.80 usec  
PLW1 72.69999695 W  
SFO2 600.0024000 MHz  
NUC2 1H  
CPDPRG2 waltz16  
PCPD2 32.50000000 W  
PLW2 32.50000000 W  
PLW12 0.70708001 W  
PLW13 0.35508999 W

F1 - Acquisition parameters  
SI 131072  
SF 150.8701276 MHz  
WDW EM  
SSB 0  
LB 1.00 Hz  
GB 0  
PC 1.40

F2 - Processing parameters  
SI 131072  
SF 150.8701276 MHz  
WDW EM  
SSB 0  
LB 1.00 Hz  
GB 0  
PC 1.40

F1 - Processing parameters  
SI 131072  
SF 150.8701276 MHz  
WDW EM  
SSB 0  
LB 1.00 Hz  
GB 0  
PC 1.40

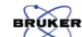

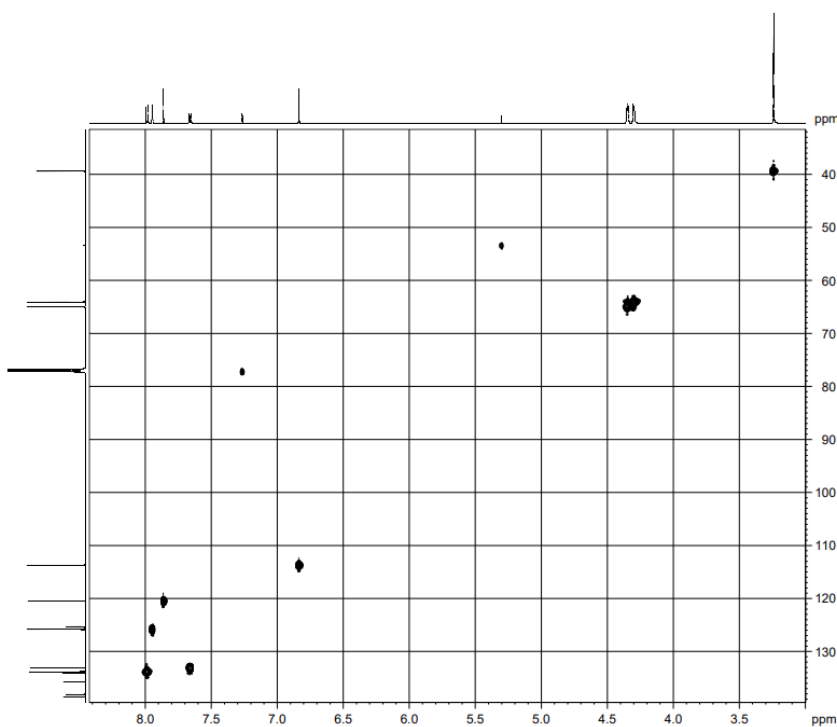

HSQC (140Hz) 7  
 144361  
 bge1721-1721-BGE\_1  
 Berecz Gabor  
 2025.03.07. (KP)

Current Data Parameters  
 NAME 144361  
 EXPNO 1  
 PROCNO 1

F2 - Acquisition Parameters  
 Date\_ 20250307  
 Time\_ 4:51 h  
 INSTRUM spect  
 PRSMD 144361\_002\_1  
 F2PROC hbge1721p02\_1  
 ID 2048  
 SOLVENT CDCl3  
 NS 4  
 DS 4  
 SWH 7812.350 Hz  
 FIDRES 7.420390 Hz  
 AQ 0.1110730 sec  
 RG 186.01  
 DW 64.000 usec  
 DE 29.00 usec  
 TE 298.2 K

NUC1 140.000000  
 CNUC17 -0.300000  
 D0 0.0000000 sec  
 D1 1.0000000 sec  
 D2 0.0010000 sec  
 D3 0.0000000 sec  
 D4 0.0000000 sec  
 D5 0.0000000 sec  
 D6 0.0000000 sec  
 D7 0.0000000 sec  
 D8 0.0000000 sec  
 D9 0.0000000 sec  
 D10 0.0000000 sec  
 D11 0.0000000 sec  
 D12 0.0000000 sec  
 D13 0.0000000 sec  
 D14 0.0000000 sec  
 D15 0.0000000 sec  
 D16 0.0000000 sec  
 D17 0.0000000 sec  
 D18 0.0000000 sec  
 D19 0.0000000 sec  
 D20 0.0000000 sec  
 D21 0.0000000 sec  
 D22 0.0000000 sec  
 D23 0.0000000 sec  
 D24 0.0000000 sec  
 D25 0.0000000 sec  
 D26 0.0000000 sec  
 D27 0.0000000 sec  
 D28 0.0000000 sec  
 D29 0.0000000 sec  
 D30 0.0000000 sec  
 D31 0.0000000 sec  
 D32 0.0000000 sec  
 D33 0.0000000 sec  
 D34 0.0000000 sec  
 D35 0.0000000 sec  
 D36 0.0000000 sec  
 D37 0.0000000 sec  
 D38 0.0000000 sec  
 D39 0.0000000 sec  
 D40 0.0000000 sec  
 D41 0.0000000 sec  
 D42 0.0000000 sec  
 D43 0.0000000 sec  
 D44 0.0000000 sec  
 D45 0.0000000 sec  
 D46 0.0000000 sec  
 D47 0.0000000 sec  
 D48 0.0000000 sec  
 D49 0.0000000 sec  
 D50 0.0000000 sec  
 D51 0.0000000 sec  
 D52 0.0000000 sec  
 D53 0.0000000 sec  
 D54 0.0000000 sec  
 D55 0.0000000 sec  
 D56 0.0000000 sec  
 D57 0.0000000 sec  
 D58 0.0000000 sec  
 D59 0.0000000 sec  
 D60 0.0000000 sec  
 D61 0.0000000 sec  
 D62 0.0000000 sec  
 D63 0.0000000 sec  
 D64 0.0000000 sec  
 D65 0.0000000 sec  
 D66 0.0000000 sec  
 D67 0.0000000 sec  
 D68 0.0000000 sec  
 D69 0.0000000 sec  
 D70 0.0000000 sec  
 D71 0.0000000 sec  
 D72 0.0000000 sec  
 D73 0.0000000 sec  
 D74 0.0000000 sec  
 D75 0.0000000 sec  
 D76 0.0000000 sec  
 D77 0.0000000 sec  
 D78 0.0000000 sec  
 D79 0.0000000 sec  
 D80 0.0000000 sec  
 D81 0.0000000 sec  
 D82 0.0000000 sec  
 D83 0.0000000 sec  
 D84 0.0000000 sec  
 D85 0.0000000 sec  
 D86 0.0000000 sec  
 D87 0.0000000 sec  
 D88 0.0000000 sec  
 D89 0.0000000 sec  
 D90 0.0000000 sec  
 D91 0.0000000 sec  
 D92 0.0000000 sec  
 D93 0.0000000 sec  
 D94 0.0000000 sec  
 D95 0.0000000 sec  
 D96 0.0000000 sec  
 D97 0.0000000 sec  
 D98 0.0000000 sec  
 D99 0.0000000 sec  
 D100 0.0000000 sec

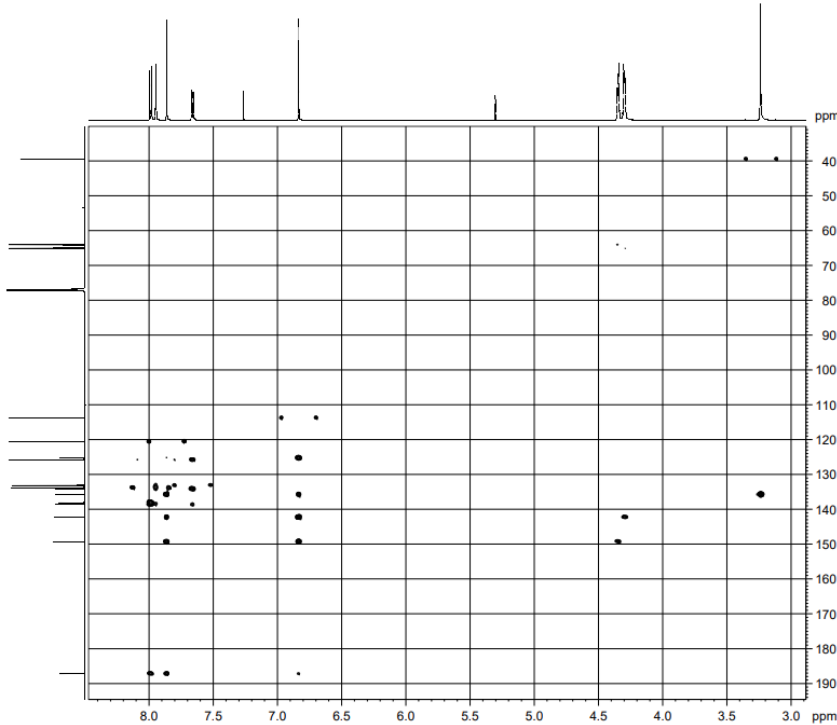

HMBC (8Hz, 140Hz) 7  
 144361  
 bge1721-1721-BGE\_1  
 Berecz Gabor  
 2025.03.07. (KP)

Current Data Parameters  
 NAME 144361  
 EXPNO 1  
 PROCNO 1

F2 - Acquisition Parameters  
 Date\_ 20250307  
 Time\_ 4:51 h  
 INSTRUM spect  
 PRSMD 144361\_002\_1  
 F2PROC hbge1721p02\_1  
 ID 2048  
 SOLVENT CDCl3  
 NS 4  
 DS 4  
 SWH 7812.350 Hz  
 FIDRES 7.420390 Hz  
 AQ 0.1110730 sec  
 RG 186.01  
 DW 64.000 usec  
 DE 29.00 usec  
 TE 298.2 K

NUC1 140.000000  
 CNUC17 -0.300000  
 D0 0.0000000 sec  
 D1 1.0000000 sec  
 D2 0.0010000 sec  
 D3 0.0000000 sec  
 D4 0.0000000 sec  
 D5 0.0000000 sec  
 D6 0.0000000 sec  
 D7 0.0000000 sec  
 D8 0.0000000 sec  
 D9 0.0000000 sec  
 D10 0.0000000 sec  
 D11 0.0000000 sec  
 D12 0.0000000 sec  
 D13 0.0000000 sec  
 D14 0.0000000 sec  
 D15 0.0000000 sec  
 D16 0.0000000 sec  
 D17 0.0000000 sec  
 D18 0.0000000 sec  
 D19 0.0000000 sec  
 D20 0.0000000 sec  
 D21 0.0000000 sec  
 D22 0.0000000 sec  
 D23 0.0000000 sec  
 D24 0.0000000 sec  
 D25 0.0000000 sec  
 D26 0.0000000 sec  
 D27 0.0000000 sec  
 D28 0.0000000 sec  
 D29 0.0000000 sec  
 D30 0.0000000 sec  
 D31 0.0000000 sec  
 D32 0.0000000 sec  
 D33 0.0000000 sec  
 D34 0.0000000 sec  
 D35 0.0000000 sec  
 D36 0.0000000 sec  
 D37 0.0000000 sec  
 D38 0.0000000 sec  
 D39 0.0000000 sec  
 D40 0.0000000 sec  
 D41 0.0000000 sec  
 D42 0.0000000 sec  
 D43 0.0000000 sec  
 D44 0.0000000 sec  
 D45 0.0000000 sec  
 D46 0.0000000 sec  
 D47 0.0000000 sec  
 D48 0.0000000 sec  
 D49 0.0000000 sec  
 D50 0.0000000 sec  
 D51 0.0000000 sec  
 D52 0.0000000 sec  
 D53 0.0000000 sec  
 D54 0.0000000 sec  
 D55 0.0000000 sec  
 D56 0.0000000 sec  
 D57 0.0000000 sec  
 D58 0.0000000 sec  
 D59 0.0000000 sec  
 D60 0.0000000 sec  
 D61 0.0000000 sec  
 D62 0.0000000 sec  
 D63 0.0000000 sec  
 D64 0.0000000 sec  
 D65 0.0000000 sec  
 D66 0.0000000 sec  
 D67 0.0000000 sec  
 D68 0.0000000 sec  
 D69 0.0000000 sec  
 D70 0.0000000 sec  
 D71 0.0000000 sec  
 D72 0.0000000 sec  
 D73 0.0000000 sec  
 D74 0.0000000 sec  
 D75 0.0000000 sec  
 D76 0.0000000 sec  
 D77 0.0000000 sec  
 D78 0.0000000 sec  
 D79 0.0000000 sec  
 D80 0.0000000 sec  
 D81 0.0000000 sec  
 D82 0.0000000 sec  
 D83 0.0000000 sec  
 D84 0.0000000 sec  
 D85 0.0000000 sec  
 D86 0.0000000 sec  
 D87 0.0000000 sec  
 D88 0.0000000 sec  
 D89 0.0000000 sec  
 D90 0.0000000 sec  
 D91 0.0000000 sec  
 D92 0.0000000 sec  
 D93 0.0000000 sec  
 D94 0.0000000 sec  
 D95 0.0000000 sec  
 D96 0.0000000 sec  
 D97 0.0000000 sec  
 D98 0.0000000 sec  
 D99 0.0000000 sec  
 D100 0.0000000 sec

STANDARD PROTON PARAMETERS  
 53958  
 1732-BGE  
 Berecz Gabor  
 2004.06.04. (DA)  
 Pulse Sequence: s2pu1  
 Solvent: CDCl3  
 Temp.: 25.0 C / 298.1 K  
 INOVA-500 "1500"

Pulse 90.0 degrees  
 Acq. time 5.000 sec  
 Width 8000.0 Hz  
 16 repetitions  
 OBSERVE H1, 499.5244679 MHz  
 DATA PROCESSING  
 FT size 131072  
 Total time 1 min, 20 sec

| INDEX | FREQUENCY | PPM    | HEIGHT |
|-------|-----------|--------|--------|
| 1     | 3977.295  | 7.962  | 48.1   |
| 2     | 3975.342  | 7.958  | 50.4   |
| 3     | 3973.267  | 7.954  | 64.7   |
| 4     | 3964.722  | 7.937  | 70.9   |
| 5     | 3814.453  | 7.636  | 44.9   |
| 6     | 3812.378  | 7.632  | 43.4   |
| 7     | 3805.908  | 7.619  | 40.9   |
| 8     | 3803.833  | 7.615  | 39.4   |
| 9     | 3629.395  | 7.266  | 25.3   |
| 10    | 3516.235  | 7.039  | 51.5   |
| 11    | 3507.568  | 7.022  | 111.6  |
| 12    | 3492.554  | 6.992  | 108.5  |
| 13    | 3483.887  | 6.974  | 54.5   |
| 14    | 2646.606  | 5.298  | 25.9   |
| 15    | 2150.513  | 4.305  | 22.6   |
| 16    | 2148.804  | 4.302  | 39.4   |
| 17    | 2146.851  | 4.298  | 33.3   |
| 18    | 2145.142  | 4.294  | 56.9   |
| 19    | 2143.677  | 4.291  | 81.3   |
| 20    | 2139.038  | 4.282  | 82.7   |
| 21    | 2137.329  | 4.279  | 56.4   |
| 22    | 2135.498  | 4.275  | 32.1   |
| 23    | 2133.667  | 4.271  | 38.9   |
| 24    | 2131.958  | 4.268  | 20.0   |
| 25    | 1637.695  | 3.279  | 499.2  |
| 26    | -0.000    | -0.000 | 47.0   |

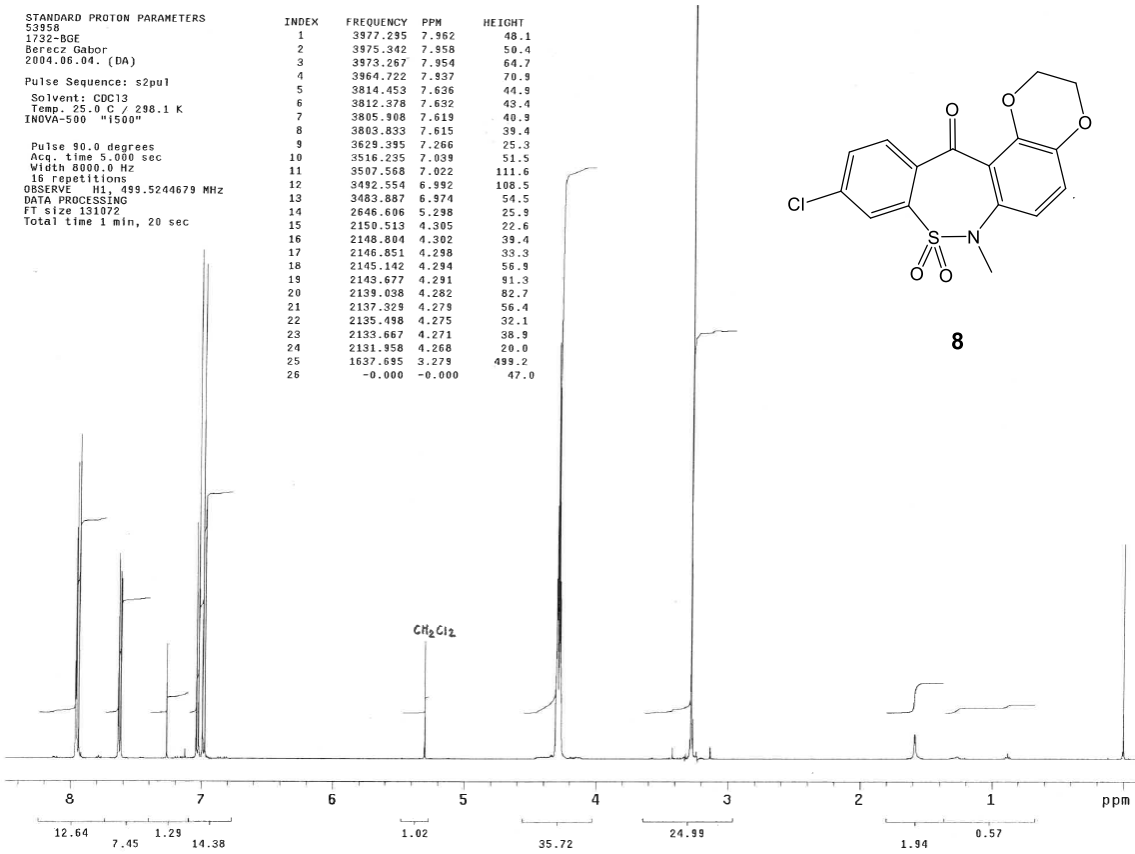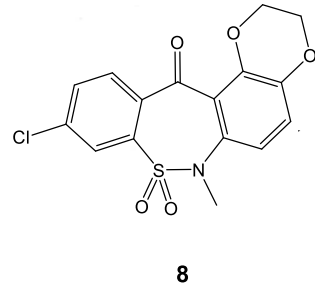

STANDARD 13C PARAMETERS  
 53958  
 1732-BGE  
 Berecz Gabor  
 2004.06.04. (DA)  
 Pulse Sequence: s2pu1  
 Solvent: CDCl3  
 Temp.: 25.0 C / 298.1 K  
 User: 1-14-87  
 INOVA-500 "1500"

Relax. delay 1.200 sec  
 Pulse 45.0 degrees  
 Acq. time 1.300 sec  
 Width 32000.0 Hz  
 2240 repetitions  
 OBSERVE C13, 125.8055311 MHz  
 DECOUPLE H1, 499.5269647 MHz  
 Power 34 dB  
 continuously on  
 WALTZ-16 modulated  
 Line broadening 0.5 Hz  
 FT size 131072  
 Total time 2 hr, 51 min, 18 sec

| INDEX | FREQUENCY | PPM     | HEIGHT |
|-------|-----------|---------|--------|
| 1     | 23823.481 | 189.669 | 45.5   |
| 2     | 18154.536 | 144.596 | 80.8   |
| 3     | 17824.846 | 141.932 | 56.7   |
| 4     | 17648.577 | 140.509 | 56.2   |
| 5     | 17608.149 | 140.186 | 64.6   |
| 6     | 16703.364 | 132.983 | 70.2   |
| 7     | 16645.747 | 132.524 | 183.0  |
| 8     | 16610.102 | 132.240 | 190.2  |
| 9     | 16253.169 | 129.399 | 69.9   |
| 10    | 16232.173 | 129.291 | 40.7   |
| 11    | 16003.657 | 127.412 | 178.3  |
| 12    | 15275.142 | 121.612 | 200.0  |
| 13    | 15198.481 | 121.002 | 192.5  |
| 14    | 9703.852  | 77.257  | 163.7  |
| 15    | 9671.826  | 77.000  | 169.8  |
| 16    | 9639.888  | 76.747  | 167.2  |
| 17    | 8088.130  | 64.353  | 186.0  |
| 18    | 8026.606  | 63.985  | 163.0  |
| 19    | 5015.376  | 39.330  | 151.1  |
| 20    | (-5.132   | -0.041  | 6.8)   |

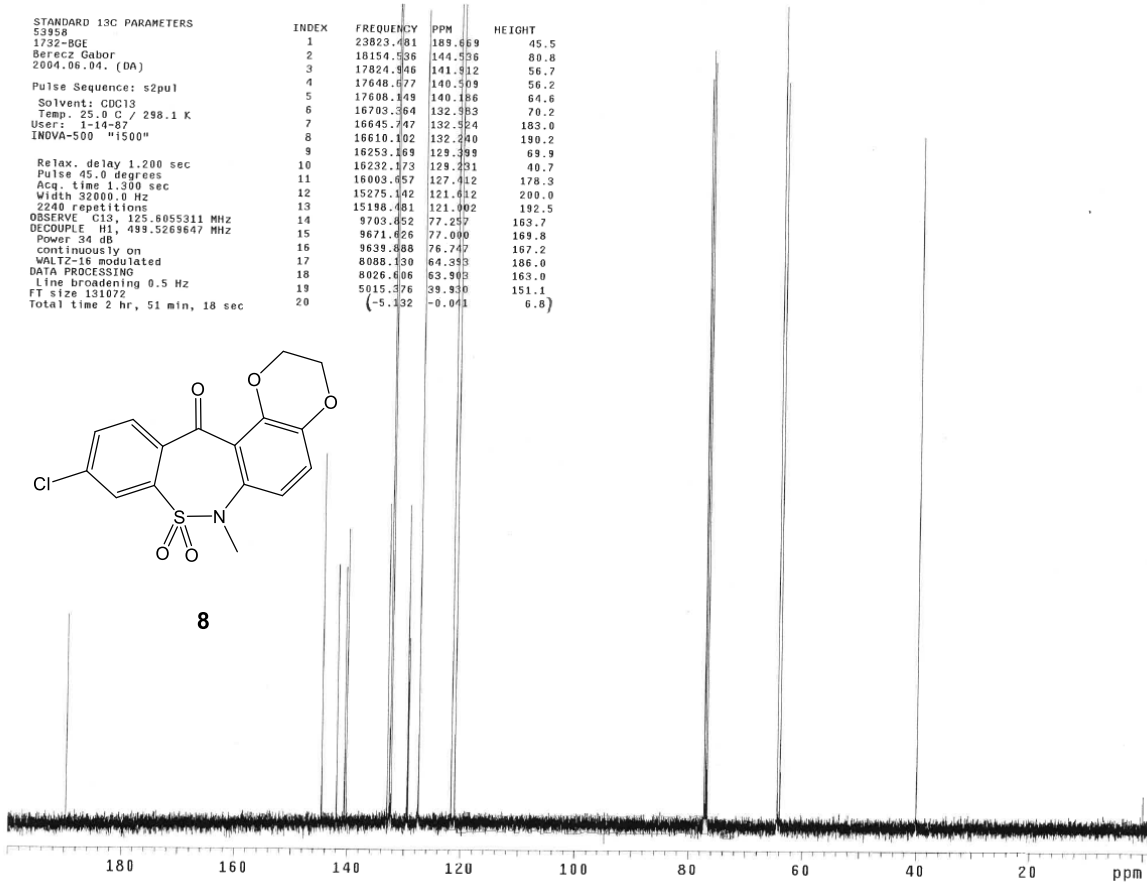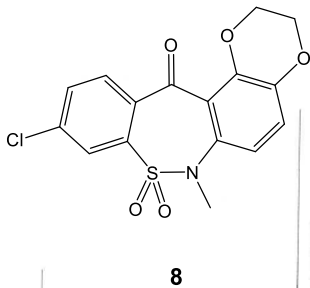

GHSQC\_DA (140 Hz)  
 53958  
 1732-BGE  
 Berecz Gabor  
 2004.06.04. (DA)  
 Pulse Sequence: ghsqc\_da  
 Solvent: CDCl3  
 Temp. 25.0 C / 298.1 K  
 INOVA-500 "i500"

Relax. delay 1.500 sec  
 Acq. time 0.098 sec  
 Width 5219.9 Hz  
 2D Width 26367.8 Hz  
 2 repetitions  
 2 x 256 increments  
 OBSERVE H1, 499.5244683 MHz  
 DECOUPLE C13, 125.6174881 MHz  
 Power 50 dB  
 on during acquisition  
 off during delay  
 GARP-1 modulated  
 DATA PROCESSING  
 Sg. sine bell 0.200 sec  
 Shifted by -0.200 sec  
 F1 DATA PROCESSING  
 Line broadening 0.3 Hz  
 Sg. sine bell 0.005 sec  
 Shifted by -0.005 sec  
 FT size 2048 x 512  
 Total time 28 min, 35 sec

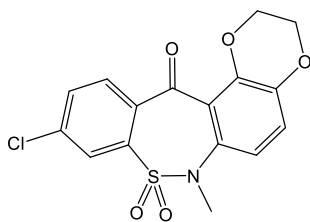

8

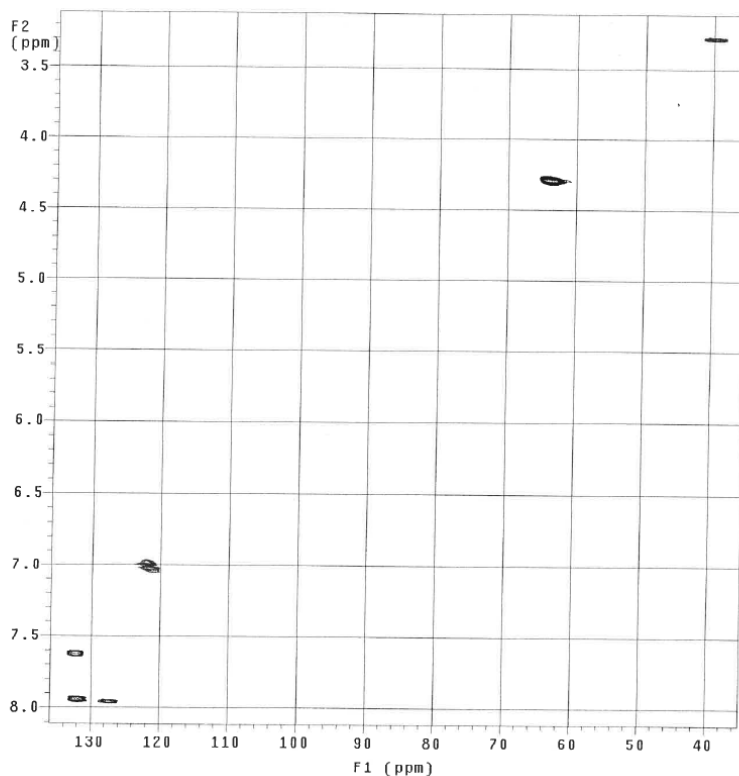

GHMOC\_DA (140 Hz, 8 Hz)  
 53958  
 1732-BGE  
 Berecz Gabor  
 2004.06.04. (DA)  
 Pulse Sequence: ghmqc\_da  
 Solvent: CDCl3  
 Temp. 25.0 C / 298.1 K  
 INOVA-500 "i500"

Relax. delay 1.500 sec  
 Acq. time 0.098 sec  
 Width 5219.9 Hz  
 2D Width 26367.8 Hz  
 4 repetitions  
 256 increments  
 OBSERVE H1, 499.5244681 MHz  
 DATA PROCESSING  
 Sine bell 0.098 sec  
 F1 DATA PROCESSING  
 Sine bell 0.002 sec  
 FT size 2048 x 512  
 Total time 29 min, 9 sec

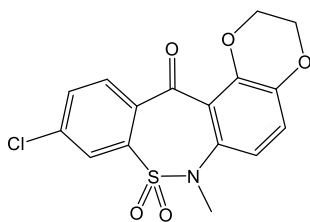

8

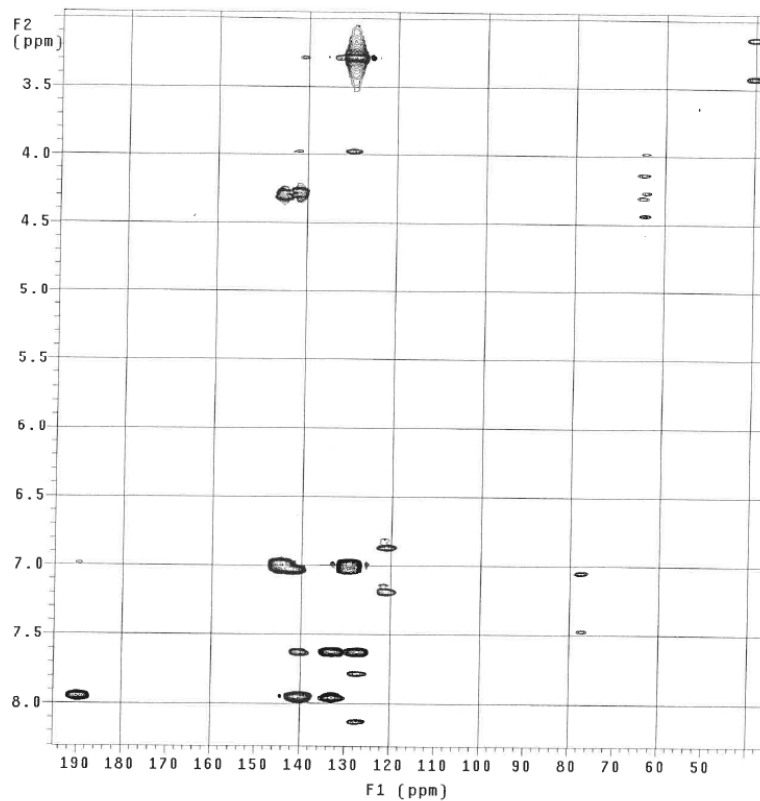

STANDARD PROTON PARAMETERS  
 56253  
 1799-BGE  
 Berecz Gabor  
 2005.01.11. (BT)  
 Solvent: DMSO  
 Temp. 25.0 C / 298.1 K  
 INOVA-500 "1500"  
 PULSE SEQUENCE  
 Relax. delay 3.000 sec  
 Pulse 90.0 degrees  
 Acq. time 5.000 sec  
 Width 8000.0 Hz  
 16 repetitions  
 OBSERVE H1, 499.5268308 MHz  
 DATA PROCESSING  
 FT size 131072  
 Total time 2 minutes

| INDEX | FREQUENCY | PPM    | HEIGHT |
|-------|-----------|--------|--------|
| 1     | 5018.799  | 10.047 | 15.1   |
| 2     | 3929.198  | 7.866  | 93.6   |
| 3     | 3927.124  | 7.862  | 106.7  |
| 4     | 3898.682  | 7.805  | 62.5   |
| 5     | 3896.606  | 7.801  | 52.4   |
| 6     | 3890.381  | 7.786  | 78.2   |
| 7     | 3888.306  | 7.784  | 72.5   |
| 8     | 3838.867  | 7.685  | 115.1  |
| 9     | 3830.566  | 7.668  | 90.7   |
| 10    | 3407.593  | 6.822  | 96.5   |
| 11    | 3399.292  | 6.805  | 109.2  |
| 12    | 3337.646  | 6.682  | 95.2   |
| 13    | 3335.449  | 6.677  | 102.4  |
| 14    | 3267.578  | 6.541  | 89.0   |
| 15    | 3285.381  | 6.537  | 62.8   |
| 16    | 3258.277  | 6.525  | 62.6   |
| 17    | 3257.080  | 6.520  | 60.0   |
| 18    | 2989.624  | 5.985  | 382.1  |
| 19    | 1913.208  | 3.830  | 556.9  |
| 20    | 1677.002  | 3.357  | 7.0    |
| 21    | 1256.958  | 2.516  | 10.5   |
| 22    | 1255.127  | 2.513  | 14.4   |
| 23    | 1253.298  | 2.509  | 37.9   |
| 24    | -0.000    | -0.000 | 14.1   |

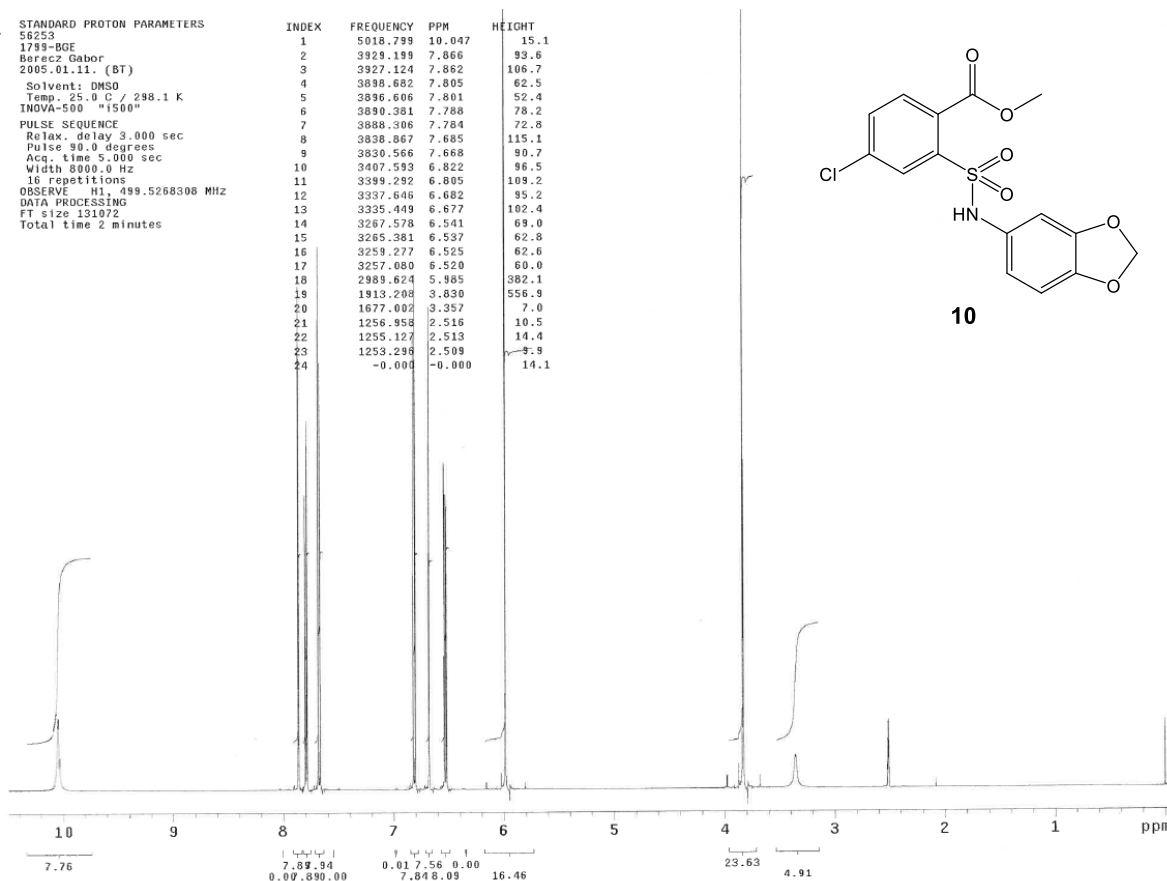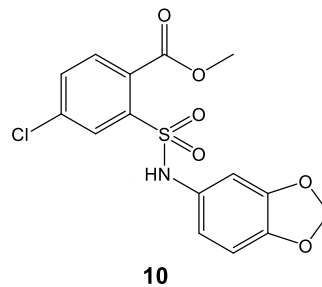

STANDARD CARBON PARAMETERS  
 56253  
 1799-BGE  
 Berecz Gabor  
 2005.01.11. (BT)  
 Solvent: DMSO  
 Temp. 25.0 C / 298.1 K  
 User: 1-14-87  
 INOVA-500 "1500"  
 PULSE SEQUENCE  
 Relax. delay 3.000 sec  
 Pulse 45.0 degrees  
 Acq. time 1.300 sec  
 Width 32000.0 Hz  
 128 repetitions  
 OBSERVE C13, 125.6061577 MHz  
 DECOUPLE H1, 499.5293374 MHz  
 Power 32 dB  
 Continuously on  
 WALTZ-16 modulated  
 Line broadening 0.5 Hz  
 FT size 131072  
 Total time 9 minutes

| INDEX | FREQUENCY | PPM     | HEIGHT |
|-------|-----------|---------|--------|
| 1     | 20941.352 | 166.716 | 73.2   |
| 2     | 18553.657 | 147.707 | 94.8   |
| 3     | 18226.599 | 145.193 | 75.9   |
| 4     | 17432.583 | 138.782 | 74.9   |
| 5     | 17022.407 | 135.517 | 75.5   |
| 6     | 16716.255 | 133.079 | 91.5   |
| 7     | 16499.458 | 131.353 | 83.1   |
| 8     | 16460.395 | 131.042 | 89.4   |
| 9     | 16393.989 | 130.514 | 98.2   |
| 10    | 16109.321 | 128.248 | 89.1   |
| 11    | 14517.036 | 115.571 | 110.5  |
| 12    | 13828.384 | 108.496 | 120.0  |
| 13    | 13079.536 | 104.127 | 116.6  |
| 14    | 12766.059 | 101.632 | 113.5  |
| 15    | 6696.723  | 53.313  | 142.5  |
| 16    | 5028.755  | 40.034  | 86.1   |
| 17    | 5008.247  | 39.871  | 172.2  |
| 18    | 4987.251  | 39.704  | 200.0  |
| 19    | 4866.255  | 39.537  | 170.3  |
| 20    | 4845.258  | 39.370  | 84.5   |

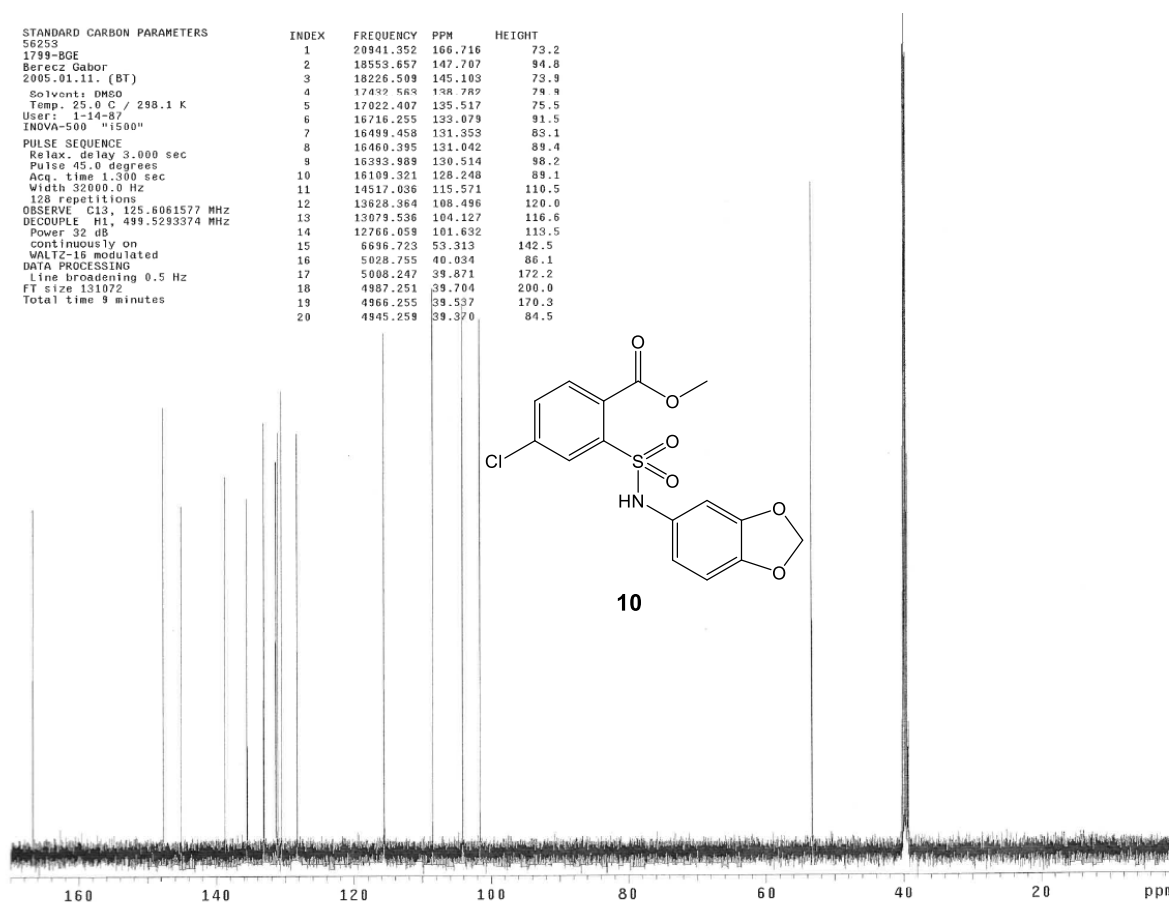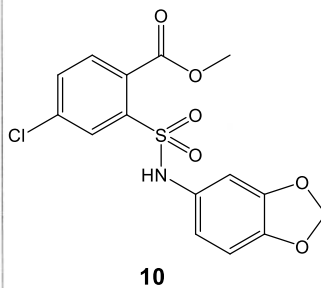

STANDARD 1H OBSERVE  
 52613  
 1699-BGE  
 Berecz Gabor  
 04/03/09(NM)  
 Solvent: CDCl3  
 Temp. 25.0 C / 298.1 K  
 Mercury-200 "mp200"  
 PULSE SEQUENCE  
 Relax. delay 5.000 sec  
 Pulse 31.5 degrees  
 Acq. time 1.993 sec  
 Width 3003.0 Hz  
 16 repetitions  
 OBSERVE H1, 200.0557670 MHz  
 DATA PROCESSING  
 FI size 16384  
 Total time 1 minutes

| INDEX | FREQUENCY PPM | HEIGHT |
|-------|---------------|--------|
| 1     | 1592.779      | 7.962  |
| 2     | 1566.752      | 7.832  |
| 3     | 1564.919      | 7.822  |
| 4     | 1557.221      | 7.784  |
| 5     | 1512.865      | 7.562  |
| 6     | 1510.666      | 7.551  |
| 7     | 1504.434      | 7.529  |
| 8     | 1502.235      | 7.509  |
| 9     | 1453.480      | 7.265  |
| 10    | 1344.973      | 6.723  |
| 11    | 1342.040      | 6.708  |
| 12    | 1339.474      | 6.696  |
| 13    | 1336.542      | 6.681  |
| 14    | 1323.345      | 6.615  |
| 15    | 1320.779      | 6.602  |
| 16    | 1314.547      | 6.571  |
| 17    | 1312.348      | 6.560  |
| 18    | 1059.409      | 5.296  |
| 19    | 839.463       | 4.196  |
| 20    | 804.638       | 4.022  |
| 21    | 325.521       | 1.627  |
| 22    | 0.000         | 0.000  |

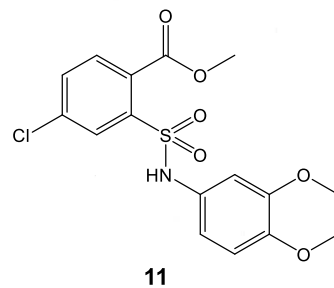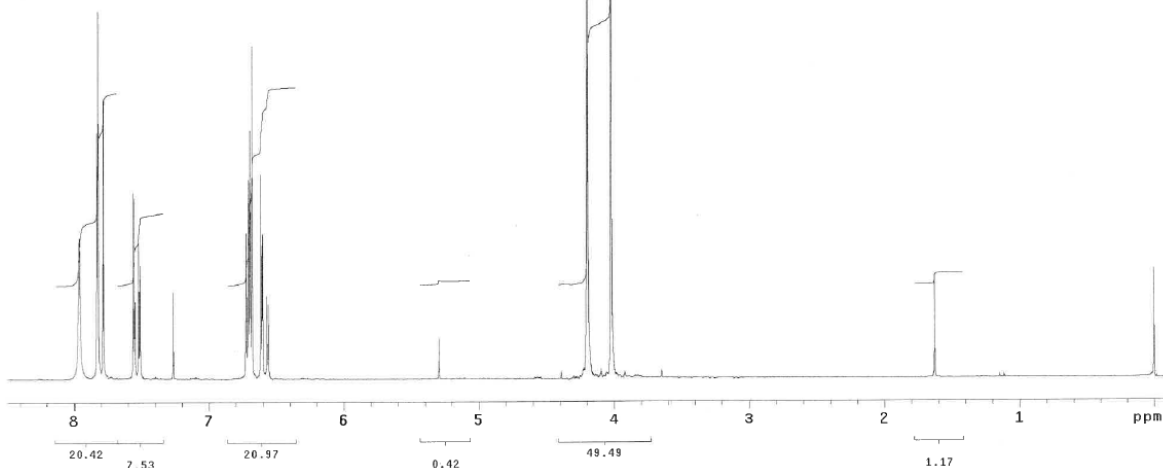

STANDARD 13C OBSERVE  
 52613  
 1699-BGE  
 Berecz Gabor  
 04/03/09(NM)  
 Solvent: CDCl3  
 Temp. 25.0 C / 298.1 K  
 Mercury-200 "mp200"  
 PULSE SEQUENCE  
 Relax. delay 3.000 sec  
 Pulse 60.0 degrees  
 Acq. time 1.437 sec  
 Width 12484.4 Hz  
 144 repetitions  
 OBSERVE C13, 50.3040647 MHz  
 DECOUPLE H1, 200.0567131 MHz  
 Power 36 dB  
 continuously on  
 WALTZ-16 modulated  
 DATA PROCESSING  
 Line broadening 1.0 Hz  
 FI size 65536  
 Total time 10 minutes

| INDEX | FREQUENCY PPM | HEIGHT  |
|-------|---------------|---------|
| 1     | 8414.392      | 167.258 |
| 2     | 7224.168      | 143.539 |
| 3     | 7155.351      | 142.251 |
| 4     | 7051.578      | 140.168 |
| 5     | 6951.377      | 138.177 |
| 6     | 6661.822      | 132.421 |
| 7     | 6648.106      | 132.148 |
| 8     | 6572.288      | 130.641 |
| 9     | 6503.328      | 129.270 |
| 10    | 6461.800      | 128.445 |
| 11    | 5910.121      | 117.479 |
| 12    | 5885.738      | 116.994 |
| 13    | 5691.050      | 113.124 |
| 14    | 3905.715      | 77.636  |
| 15    | 3873.711      | 77.000  |
| 16    | 3841.708      | 76.364  |
| 17    | 3230.213      | 64.209  |
| 18    | 3225.260      | 64.110  |
| 19    | 2697.965      | 53.628  |

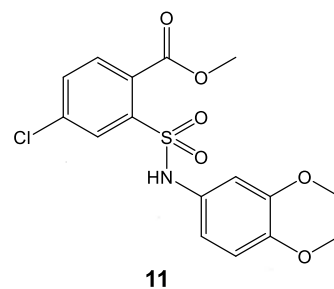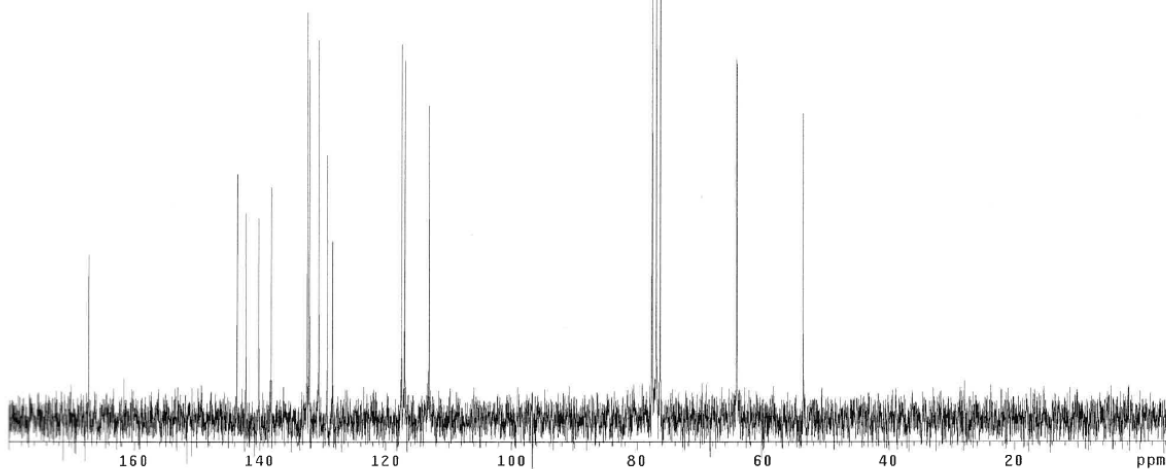



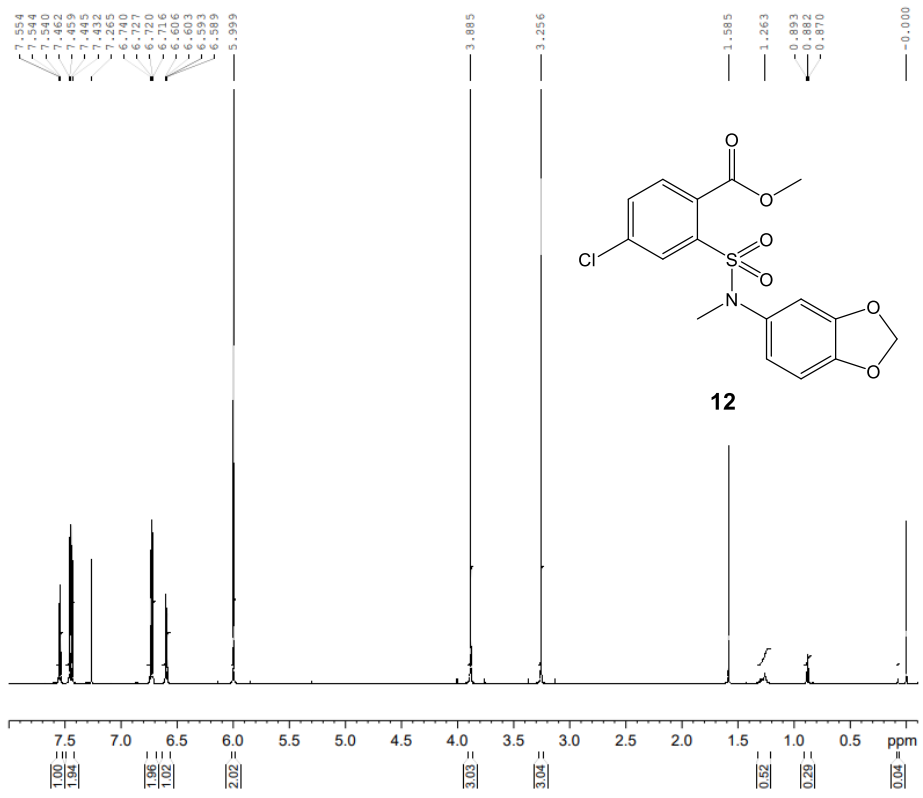

Standard 1H  
143511  
BEG0702\_1  
Berez Gabor  
2024.09.13. (KP)

Current Data Parameters  
NAME 143511  
EXPNO 11  
PROCNO 1

F2 - Acquisition Parameters  
Date\_ 20240913  
Time 21.39 h  
INSTRUM spect  
PROBHD Z145856\_0002 ( )  
PULPROG zg30  
TD 65536  
SOLVENT CDCl3  
NS 16  
DS 2  
SWH 12019.230 Hz  
FIDRES 0.366798 Hz  
AQ 2.7262976 sec  
RG 196.07  
DW 41.600 usec  
DE 25.00 usec  
TE 295.0 K  
D1 1.00000000 sec  
TDO 1  
SFO1 600.0037050 MHz  
NUC1 1H  
P1 11.50 usec  
PLW1 28.00000000 W

F2 - Processing parameters  
SI 65536  
SF 600.0000121 MHz  
WDW EM  
SSB 0  
LB 0.30 Hz  
GB 0  
PC 1.00

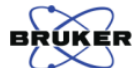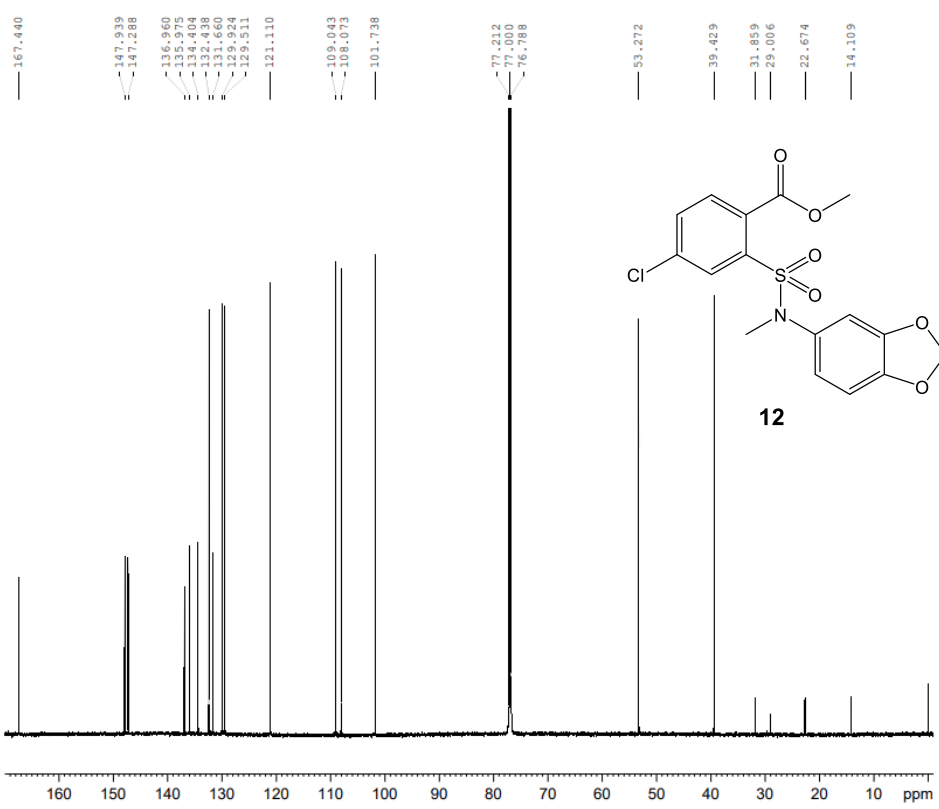

Standard 13C  
143511  
BEG0702\_1  
Berez Gabor  
2024.09.13. (KP)

Current Data Parameters  
NAME 143511  
EXPNO 12  
PROCNO 1

F2 - Acquisition Parameters  
Date\_ 20240913  
Time 22.48 h  
INSTRUM spect  
PROBHD Z145856\_0002 ( )  
PULPROG zgpg30  
TD 65536  
SOLVENT CDCl3  
NS 2048  
DS 4  
SWH 36231.883 Hz  
FIDRES 1.105709 Hz  
AQ 0.9043968 sec  
RG 196.07  
DW 13.800 usec  
DE 18.00 usec  
TE 295.0 K  
D1 1.00000000 sec  
D11 0.03000000 sec  
TDO 1  
SFO1 150.8852070 MHz  
NUC1 13C  
P1 9.90 usec  
PLW1 71.00000000 W  
SFO2 600.0024000 MHz  
NUC2 1H  
CPDPRG2 waltz16  
PCPD2 80.00 usec  
PLW2 32.90000153 W  
PLW12 0.70370001 W  
PLW13 0.35339001 W

F2 - Processing parameters  
SI 131072  
SF 150.8701269 MHz  
WDW EM  
SSB 0  
LB 1.00 Hz  
GB 0  
PC 1.40

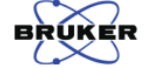



HMBC (8 Hz, 140 Hz) 12  
 143511  
 BEG0702\_1  
 Berecz Gabor  
 2024.09.17. (DA)

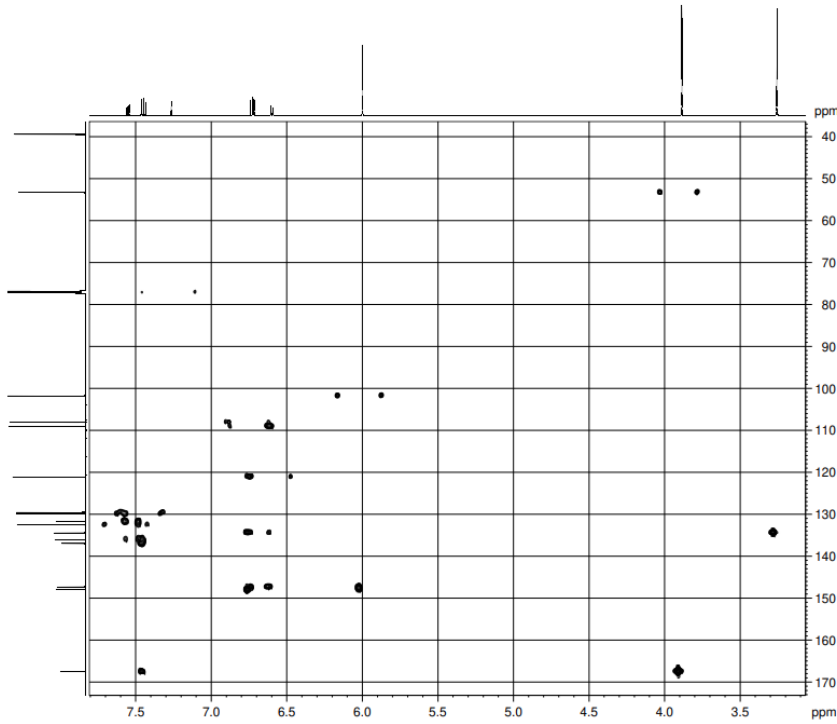

```

Current Data Parameters
NAME      143511
EXPNO    25
PROCNO   1

F2 - Acquisition Parameters
Date_     20240917
Time      21:51 h
INSTRUM   spect
PROBHD    143384_0052 (
PULPROG   zgpg30
RG         2048
SFOVERT    00011
NUC1       13
NUC2       1
SOLVENT   DMSO
DS         7812.00 Hz
FIDRES    7.52930 Hz
AQ         0.111970 sec
RG         186.01
DE         64.000 usec
TE         29.00 usec
TE2        29.00 K
CST2      140.000000
CENTF1    0.000000
DE1        0.000100 sec
D1         1.5000000 sec
D2         0.000100 sec
D3         0.000100 sec
D4         0.000100 sec
D5         0.000100 sec
D6         0.000100 sec
D7         0.000100 sec
D8         0.000100 sec
D9         0.000100 sec
D10        0.000100 sec
D11        0.000100 sec
D12        0.000100 sec
D13        0.000100 sec
D14        0.000100 sec
D15        0.000100 sec
D16        0.000100 sec
D17        0.000100 sec
D18        0.000100 sec
D19        0.000100 sec
D20        0.000100 sec
SFO1      600.0037860 MHz
NUC1PROB  13
P1         11.00 usec
PC         11.00 usec
P2         21.00 usec
PC2        21.00 usec
P3         28.0000000 Hz
PC3        28.0000000 Hz
SFO2      150.8801150 MHz
NUC2PROB  13
P4         9.00 usec
PC4        9.00 usec
SFO3      71.0000000 MHz
PC5        71.0000000 Hz
SFO4      71.0000000 MHz
PC6        71.0000000 Hz
SFO5      71.0000000 MHz
PC7        71.0000000 Hz
SFO6      71.0000000 MHz
PC8        71.0000000 Hz
SFO7      71.0000000 MHz
PC9        71.0000000 Hz
SFO8      71.0000000 MHz
PC10       71.0000000 Hz
SFO9      71.0000000 MHz
PC11       71.0000000 Hz
SFO10     71.0000000 MHz
PC12       71.0000000 Hz
SFO11     71.0000000 MHz
PC13       71.0000000 Hz
SFO12     71.0000000 MHz
PC14       71.0000000 Hz
SFO13     71.0000000 MHz
PC15       71.0000000 Hz
SFO14     71.0000000 MHz
PC16       71.0000000 Hz
SFO15     71.0000000 MHz
PC17       71.0000000 Hz
SFO16     71.0000000 MHz
PC18       71.0000000 Hz
SFO17     71.0000000 MHz
PC19       71.0000000 Hz
SFO18     71.0000000 MHz
PC20       71.0000000 Hz
F1 - Acquisition parameters
ID         143511
SFO1      150.8801150 MHz
FIDRES    258.892047 Hz
AQ         219.453 sec
RG         0
PC         0
P2         21.00 usec
PC2        21.00 usec
P3         28.0000000 Hz
PC3        28.0000000 Hz
SFO2      150.8801150 MHz
NUC2PROB  13
P4         9.00 usec
PC4        9.00 usec
SFO3      71.0000000 MHz
PC5        71.0000000 Hz
SFO4      71.0000000 MHz
PC6        71.0000000 Hz
SFO5      71.0000000 MHz
PC7        71.0000000 Hz
SFO6      71.0000000 MHz
PC8        71.0000000 Hz
SFO7      71.0000000 MHz
PC9        71.0000000 Hz
SFO8      71.0000000 MHz
PC10       71.0000000 Hz
SFO9      71.0000000 MHz
PC11       71.0000000 Hz
SFO10     71.0000000 MHz
PC12       71.0000000 Hz
SFO11     71.0000000 MHz
PC13       71.0000000 Hz
SFO12     71.0000000 MHz
PC14       71.0000000 Hz
SFO13     71.0000000 MHz
PC15       71.0000000 Hz
SFO14     71.0000000 MHz
PC16       71.0000000 Hz
SFO15     71.0000000 MHz
PC17       71.0000000 Hz
SFO16     71.0000000 MHz
PC18       71.0000000 Hz
SFO17     71.0000000 MHz
PC19       71.0000000 Hz
SFO18     71.0000000 MHz
PC20       71.0000000 Hz
F2 - Processing parameters
SI         2048
SF         600.0000000 MHz
WDW        0
SSB        0
LB         0 Hz
GB         0
PC         1.40
F1 - Processing parameters
SI         1024
SF         150.8801150 MHz
WDW        0
SSB        0
LB         0 Hz
GB         0
  
```

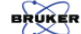

STANDARD 1H OBSERVE  
52745  
1702-BGE  
Berecz Gabor  
04/03/16(NM)  
Solvent: CDCl3  
Temp. 25.0 C / 298.1 K  
Mercury-200 "mp200"  
PULSE SEQUENCE  
Relax. delay 5.000 sec  
Pulse 31.5 degrees  
Acq. time 1.993 sec  
Width 3005.0 Hz  
16 repetitions  
OBSERVE H1, 200.0557652 MHz  
DATA PROCESSING  
FT size 16384  
Total time 1 minutes

| INDEX | FREQUENCY | PPM    | HEIGHT |
|-------|-----------|--------|--------|
| 1     | 1513.599  | 7.566  | 19.7   |
| 2     | 1511.766  | 7.557  | 23.2   |
| 3     | 1505.534  | 7.526  | 41.5   |
| 4     | 1503.701  | 7.516  | 43.9   |
| 5     | 1490.138  | 7.449  | 71.1   |
| 6     | 1487.205  | 7.439  | 60.2   |
| 7     | 1485.006  | 7.423  | 49.6   |
| 8     | 1482.075  | 7.408  | 33.3   |
| 9     | 1454.946  | 7.273  | 12.4   |
| 10    | 1364.768  | 6.822  | 38.5   |
| 11    | 1355.970  | 6.778  | 65.6   |
| 12    | 1344.973  | 6.723  | 45.2   |
| 13    | 1342.407  | 6.710  | 63.7   |
| 14    | 1335.075  | 6.674  | 43.7   |
| 15    | 1332.509  | 6.661  | 29.4   |
| 16    | 1326.277  | 6.630  | 26.7   |
| 17    | 1323.711  | 6.617  | 19.7   |
| 18    | 1059.776  | 5.297  | 3.9    |
| 19    | 853.382   | 4.266  | 17.3   |
| 20    | 849.360   | 4.246  | 248.8  |
| 21    | 844.981   | 4.224  | 14.0   |
| 22    | 841.295   | 4.205  | 3.5    |
| 23    | 774.945   | 3.874  | 339.4  |
| 24    | 648.476   | 3.241  | 363.2  |
| 25    | 333.952   | 1.664  | 12.6   |
| 26    | -0.000    | -0.000 | 14.2   |

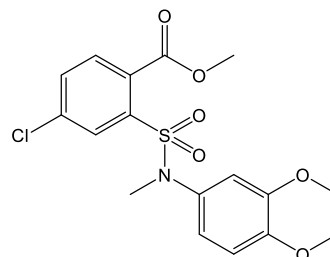

13

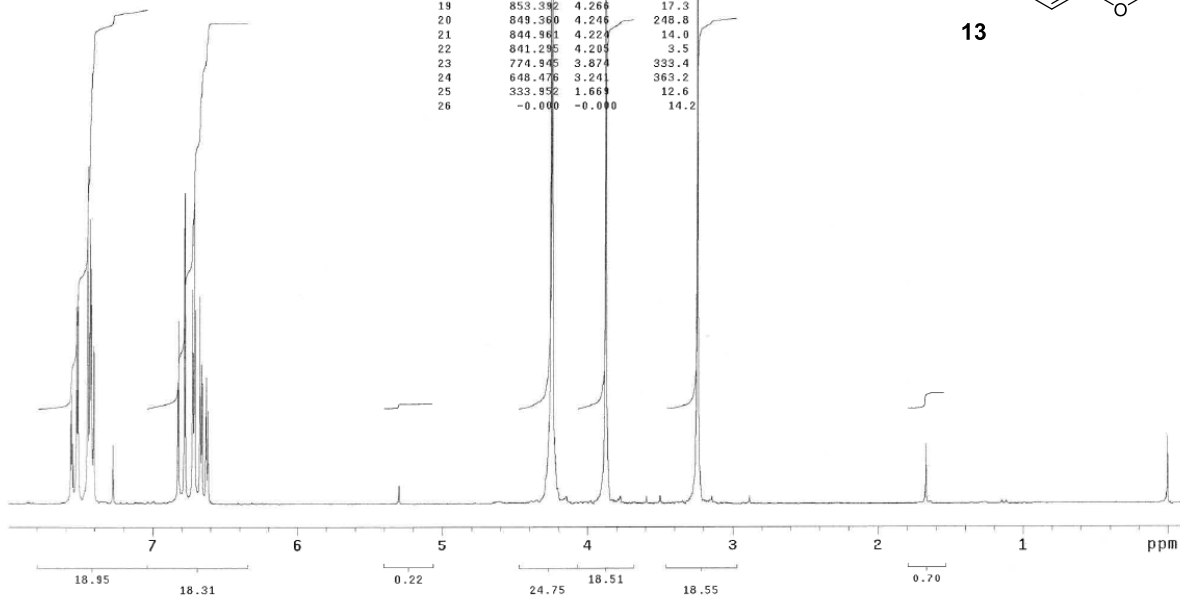

STANDARD 13C OBSERVE  
52745  
1702-BGE  
Berecz Gabor  
04/03/16(NM)  
Solvent: CDCl3  
Temp. 25.0 C / 298.1 K  
Mercury-200 "mp200"  
PULSE SEQUENCE  
Relax. delay 3.000 sec  
Pulse 60.0 degrees  
Acq. time 1.497 sec  
Width 12484.4 Hz  
96 repetitions  
OBSERVE C13, 50.3040655 MHz  
DECOUPLE H1, 200.0567131 MHz  
Power 96 dB  
continuously on  
WALTZ-16 modulated  
DATA PROCESSING  
Line broadening 1.0 Hz  
FT size 6536  
Total time 7 minutes

| INDEX | FREQUENCY | PPM     | HEIGHT |
|-------|-----------|---------|--------|
| 1     | 8420.889  | 167.386 | 51.9   |
| 2     | 7218.072  | 143.478 | 67.0   |
| 3     | 7210.833  | 143.334 | 61.6   |
| 4     | 6891.180  | 136.980 | 64.0   |
| 5     | 6834.412  | 135.852 | 75.2   |
| 6     | 6731.162  | 133.799 | 69.5   |
| 7     | 6656.869  | 132.322 | 115.0  |
| 8     | 6622.579  | 131.641 | 57.5   |
| 9     | 6531.522  | 129.831 | 104.5  |
| 10    | 6512.091  | 129.445 | 115.0  |
| 11    | 6063.662  | 120.531 | 97.9   |
| 12    | 5901.740  | 117.312 | 102.3  |
| 13    | 5871.260  | 116.706 | 81.2   |
| 14    | 3905.715  | 77.836  | 162.0  |
| 15    | 3873.711  | 77.000  | 159.7  |
| 16    | 3842.089  | 76.371  | 155.1  |
| 17    | 3232.880  | 64.262  | 98.4   |
| 18    | 3227.927  | 64.163  | 94.3   |
| 19    | 2674.344  | 53.159  | 104.9  |
| 20    | 1968.744  | 39.134  | 87.3   |

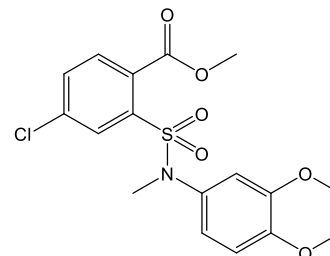

13

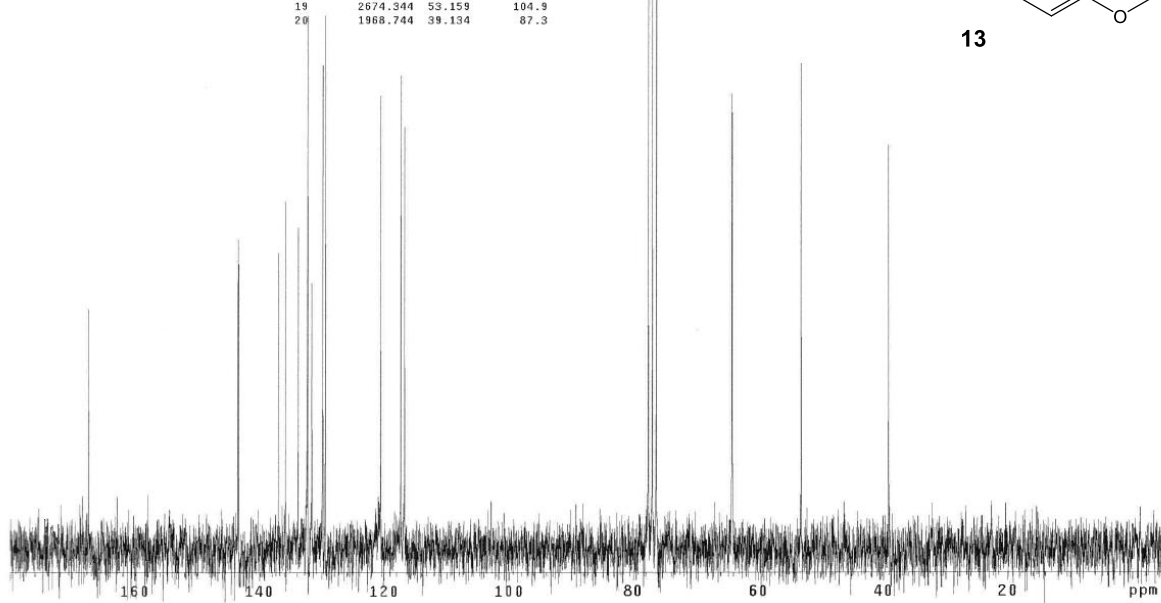

STANDARD PROTON PARAMETERS  
 56386  
 1800-BGE  
 Berecz Gabor  
 2005/01/19 (SzA)  
 Solvent: DMSO  
 Temp. 25.0 C / 298.1 K  
 INOVA-500 "i500"  
 PULSE SEQUENCE  
 Relax. delay 3.000 sec  
 Pulse 90.0 degrees  
 Acq. time 5.000 sec  
 Width 11999.4 Hz  
 15 repetitions  
 OBSERVE H1, 499.5268292 MHz  
 DATA PROCESSING  
 FT size 131072  
 Total time 2 minutes

| INDEX | FREQUENCY PPM | HEIGHT | INDEX | FREQUENCY PPM | HEIGHT | INDEX | FREQUENCY PPM | HEIGHT |
|-------|---------------|--------|-------|---------------|--------|-------|---------------|--------|
| 1     | 6856.041      | 13.725 | 40    | 3404.310      | 6.815  | 79    | 1252.013      | 2.506  |
| 2     | 3905.261      | 7.818  | 41    | 3386.183      | 6.779  | 80    | 1250.182      | 2.503  |
| 3     | 3903.247      | 7.814  | 42    | 3383.966      | 6.774  | 81    | 1038.156      | 2.078  |
| 4     | 3897.022      | 7.801  | 43    | 3351.029      | 6.708  | 82    | 0.000         | 0.000  |
| 5     | 3895.008      | 7.797  | 44    | 3325.761      | 6.659  |       |               |        |
| 6     | 3891.163      | 7.790  | 45    | 3320.269      | 6.647  |       |               |        |
| 7     | 3874.867      | 7.757  | 46    | 3318.071      | 6.642  |       |               |        |
| 8     | 3849.783      | 7.707  | 47    | 3315.142      | 6.637  |       |               |        |
| 9     | 3841.544      | 7.690  | 48    | 3312.029      | 6.630  |       |               |        |
| 10    | 3835.135      | 7.678  | 49    | 3309.832      | 6.626  |       |               |        |
| 11    | 3833.854      | 7.675  | 50    | 3306.536      | 6.619  |       |               |        |
| 12    | 3829.643      | 7.667  | 51    | 3304.339      | 6.615  |       |               |        |
| 13    | 3825.431      | 7.658  | 52    | 3112.637      | 6.231  |       |               |        |
| 14    | 3821.403      | 7.650  | 53    | 3046.723      | 6.099  |       |               |        |
| 15    | 3817.009      | 7.641  | 54    | 3026.216      | 6.058  |       |               |        |
| 16    | 3815.727      | 7.639  | 55    | 3014.498      | 6.035  |       |               |        |
| 17    | 3801.079      | 7.609  | 56    | 3006.075      | 6.018  |       |               |        |
| 18    | 3745.052      | 7.487  | 57    | 3002.413      | 6.011  |       |               |        |
| 19    | 3680.602      | 7.368  | 58    | 2937.048      | 5.880  |       |               |        |
| 20    | 3660.278      | 7.327  | 59    | 1873.500      | 3.350  |       |               |        |
| 21    | 3658.447      | 7.324  | 60    | 1862.638      | 3.329  |       |               |        |
| 22    | 3640.138      | 7.287  | 61    | 1633.056      | 3.269  |       |               |        |
| 23    | 3637.941      | 7.283  | 62    | 1613.811      | 3.231  |       |               |        |
| 24    | 3488.717      | 6.984  | 63    | 1613.445      | 3.230  |       |               |        |
| 25    | 3486.703      | 6.980  | 64    | 1612.346      | 3.228  |       |               |        |
| 26    | 3463.693      | 6.934  | 65    | 1593.304      | 3.190  |       |               |        |
| 27    | 3455.211      | 6.917  | 66    | 1581.536      | 3.166  |       |               |        |
| 28    | 3447.154      | 6.901  | 67    | 1573.164      | 3.149  |       |               |        |
| 29    | 3443.309      | 6.893  | 68    | 1569.319      | 3.142  |       |               |        |
| 30    | 3439.464      | 6.885  | 69    | 1564.375      | 3.132  |       |               |        |
| 31    | 3438.732      | 6.884  | 70    | 1563.459      | 3.130  |       |               |        |
| 32    | 3435.070      | 6.877  | 71    | 1560.317      | 3.124  |       |               |        |
| 33    | 3431.225      | 6.869  | 72    | 1553.755      | 3.110  |       |               |        |
| 34    | 3430.309      | 6.867  | 73    | 1549.178      | 3.101  |       |               |        |
| 35    | 3428.648      | 6.860  | 74    | 1543.592      | 3.090  |       |               |        |
| 36    | 3424.450      | 6.855  | 75    | 1521.347      | 3.046  |       |               |        |
| 37    | 3423.169      | 6.853  | 76    | 1257.505      | 2.517  |       |               |        |
| 38    | 3414.746      | 6.836  | 77    | 1255.675      | 2.514  |       |               |        |
| 39    | 3406.324      | 6.819  | 78    | 1253.844      | 2.510  |       |               |        |

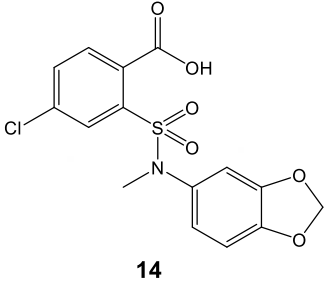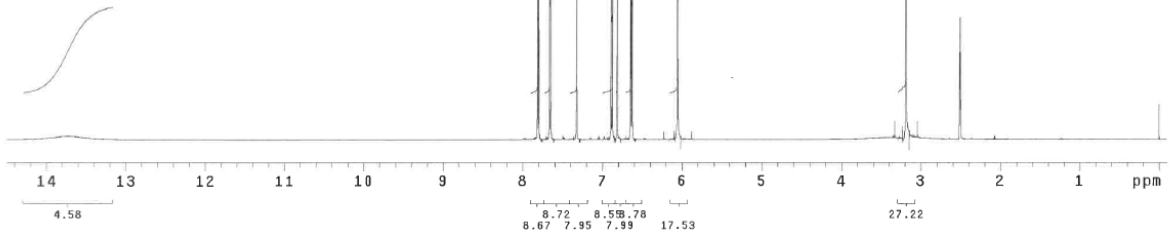

STANDARD CARBON PARAMETERS  
 56386  
 1800-BGE  
 Berecz Gabor  
 2005/01/19 (SzA)  
 Solvent: DMSO  
 Temp. 25.0 C / 298.1 K  
 Users: 1-14-87  
 INOVA-500 "i500"  
 PULSE SEQUENCE  
 Relax. delay 3.000 sec  
 Pulse 45.0 degrees  
 Acq. time 1.300 sec  
 Width 32000.0 Hz  
 328 repetitions  
 OBSERVE C13, 125.6061563 MHz  
 DECOUPLE H1, 499.5293374 MHz  
 Power 32 dB  
 continuously on  
 WALTZ-16 modulated  
 DATA PROCESSING  
 Line broadening 0.5 Hz  
 FT size 131072  
 Total time 66 minutes

| INDEX | FREQUENCY PPM | HEIGHT  |
|-------|---------------|---------|
| 1     | 21106.880     | 168.033 |
| 2     | 18543.891     | 147.629 |
| 3     | 18454.536     | 146.918 |
| 4     | 17045.844     | 135.703 |
| 5     | 16874.946     | 134.343 |
| 6     | 16841.743     | 134.078 |
| 7     | 16816.352     | 133.876 |
| 8     | 16739.204     | 133.262 |
| 9     | 16357.368     | 130.222 |
| 10    | 16185.005     | 128.850 |
| 11    | 15199.165     | 121.002 |
| 12    | 13654.243     | 108.702 |
| 13    | 13590.766     | 108.197 |
| 14    | 12893.857     | 101.931 |
| 15    | 5049.751      | 40.201  |
| 16    | 5028.755      | 40.034  |
| 17    | 5007.758      | 39.867  |
| 18    | 4986.762      | 39.700  |
| 19    | 4965.766      | 39.533  |
| 20    | 4944.770      | 39.366  |
| 21    | 4923.774      | 39.199  |
| 22    | 4915.962      | 39.136  |

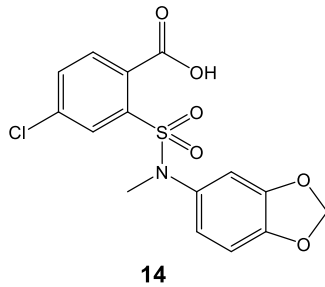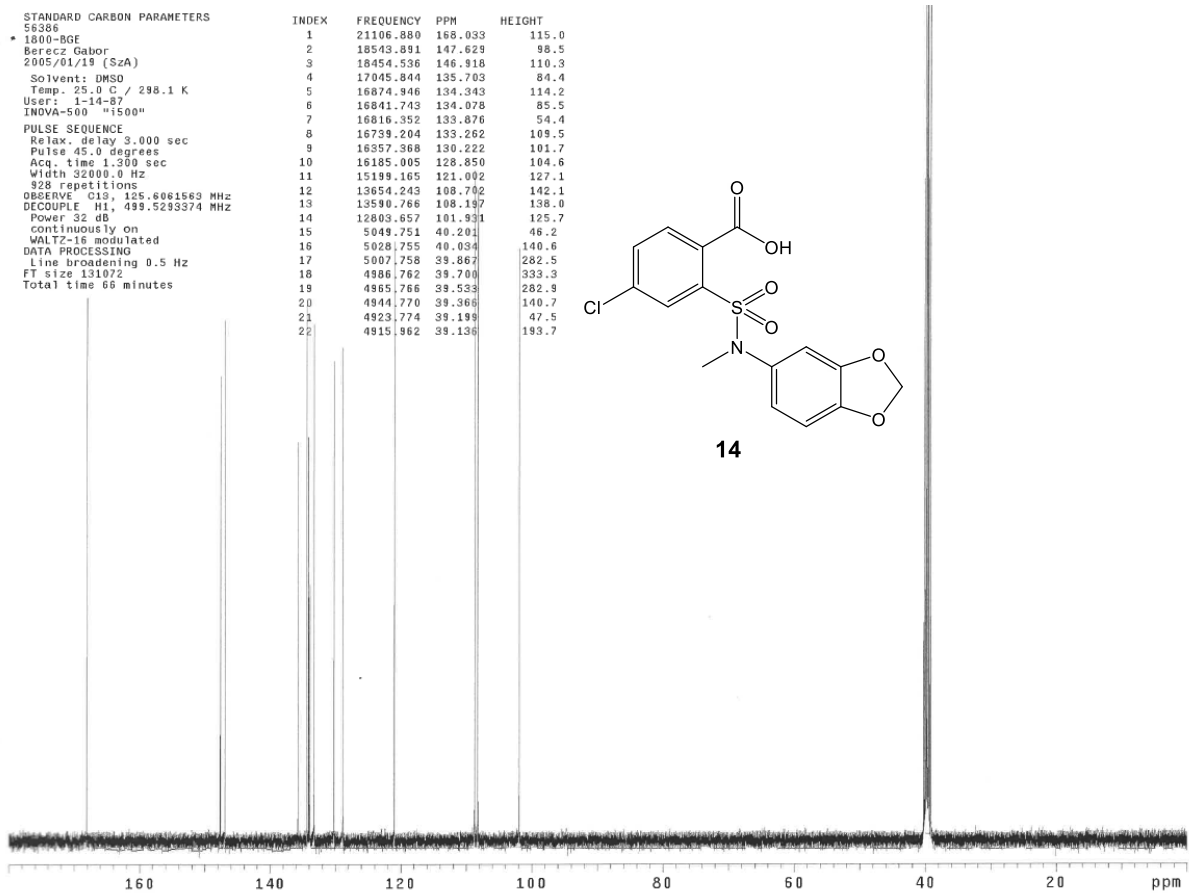

STANDARD 1H OBSERVE  
 52746  
 1703-BGE  
 Berecz Gabor  
 04/03/16(NM)  
 Solvent: DMSO  
 Temp. 25.0 C / 298.1 K  
 Mercury-200 "mp200"  
 PULSE SEQUENCE  
 Relax. delay 5.000 sec  
 Pulse 31.5 degrees  
 Acq. time 1.990 sec  
 Width 5000.0 Hz  
 16 repetitions  
 OBSERVE H1, 200.0567113 MHz  
 DATA PROCESSING  
 FT size 32768  
 Total time 1 minutes

| INDEX | FREQUENCY PPM | HEIGHT |
|-------|---------------|--------|
| 1     | 2736.511      | 13.679 |
| 2     | 1567.383      | 7.835  |
| 3     | 1565.552      | 7.826  |
| 4     | 1559.143      | 7.794  |
| 5     | 1557.007      | 7.783  |
| 6     | 1538.391      | 7.690  |
| 7     | 1530.151      | 7.649  |
| 8     | 1459.351      | 7.235  |
| 9     | 1457.520      | 7.286  |
| 10    | 1373.901      | 6.868  |
| 11    | 1365.356      | 6.825  |
| 12    | 1346.130      | 6.729  |
| 13    | 1343.994      | 6.718  |
| 14    | 1336.060      | 6.678  |
| 15    | 1333.618      | 6.666  |
| 16    | 1327.515      | 6.636  |
| 17    | 1325.073      | 6.623  |
| 18    | 848.389       | 4.241  |
| 19    | 828.247       | 4.140  |
| 20    | 837.207       | 3.185  |
| 21    | 617.065       | 3.084  |
| 22    | 505.066       | 2.525  |
| 23    | 503.235       | 2.515  |
| 24    | 501.404       | 2.506  |
| 25    | 0.000         | 0.000  |

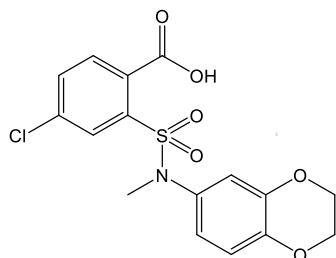

15

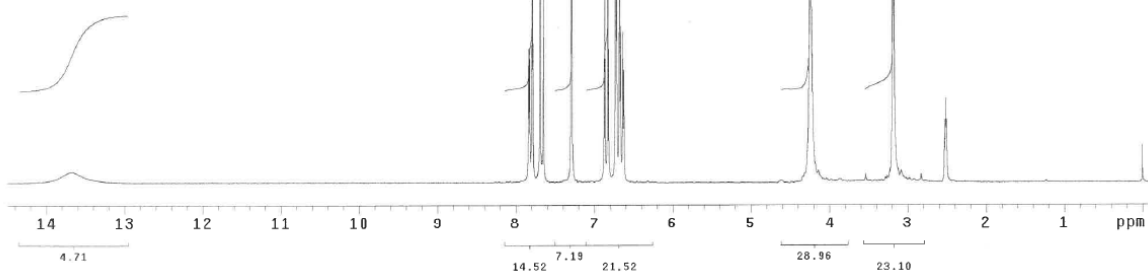

STANDARD 13C OBSERVE  
 52746  
 1703-BGE  
 Berecz Gabor  
 04/03/16(NM)  
 Solvent: DMSO  
 Temp. 25.0 C / 298.1 K  
 Mercury-200 "mp200"  
 PULSE SEQUENCE  
 Relax. delay 3.000 sec  
 Pulse 60.0 degrees  
 Acq. time 1.497 sec  
 Width 12484.4 Hz  
 112 repetitions  
 OBSERVE C13, 50.3043134 MHz  
 DECOUPLE H1, 200.0576634 MHz  
 Power 36 dB  
 continuously on  
 WALTZ-16 modulated  
 DATA PROCESSING  
 Line broadening 1.0 Hz  
 FT size 85536  
 Total time 8 minutes

| INDEX | FREQUENCY PPM | HEIGHT  |
|-------|---------------|---------|
| 1     | 8453.857      | 168.048 |
| 2     | 7213.723      | 143.396 |
| 3     | 7205.341      | 143.229 |
| 4     | 6832.730      | 135.823 |
| 5     | 6748.911      | 134.156 |
| 6     | 6725.290      | 133.687 |
| 7     | 6722.242      | 133.626 |
| 8     | 6702.811      | 133.240 |
| 9     | 6550.795      | 130.218 |
| 10    | 6481.073      | 128.832 |
| 11    | 6044.454      | 120.153 |
| 12    | 5901.201      | 117.305 |
| 13    | 5855.101      | 116.389 |
| 14    | 3231.198      | 64.230  |
| 15    | 2060.405      | 40.957  |
| 16    | 2039.070      | 40.533  |
| 17    | 2018.115      | 40.117  |
| 18    | 1997.161      | 39.700  |
| 19    | 1976.206      | 39.283  |
| 20    | 1960.585      | 38.973  |
| 21    | 1955.251      | 38.867  |
| 22    | 1934.287      | 38.450  |

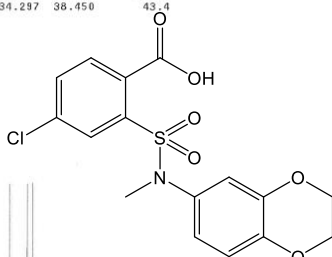

15

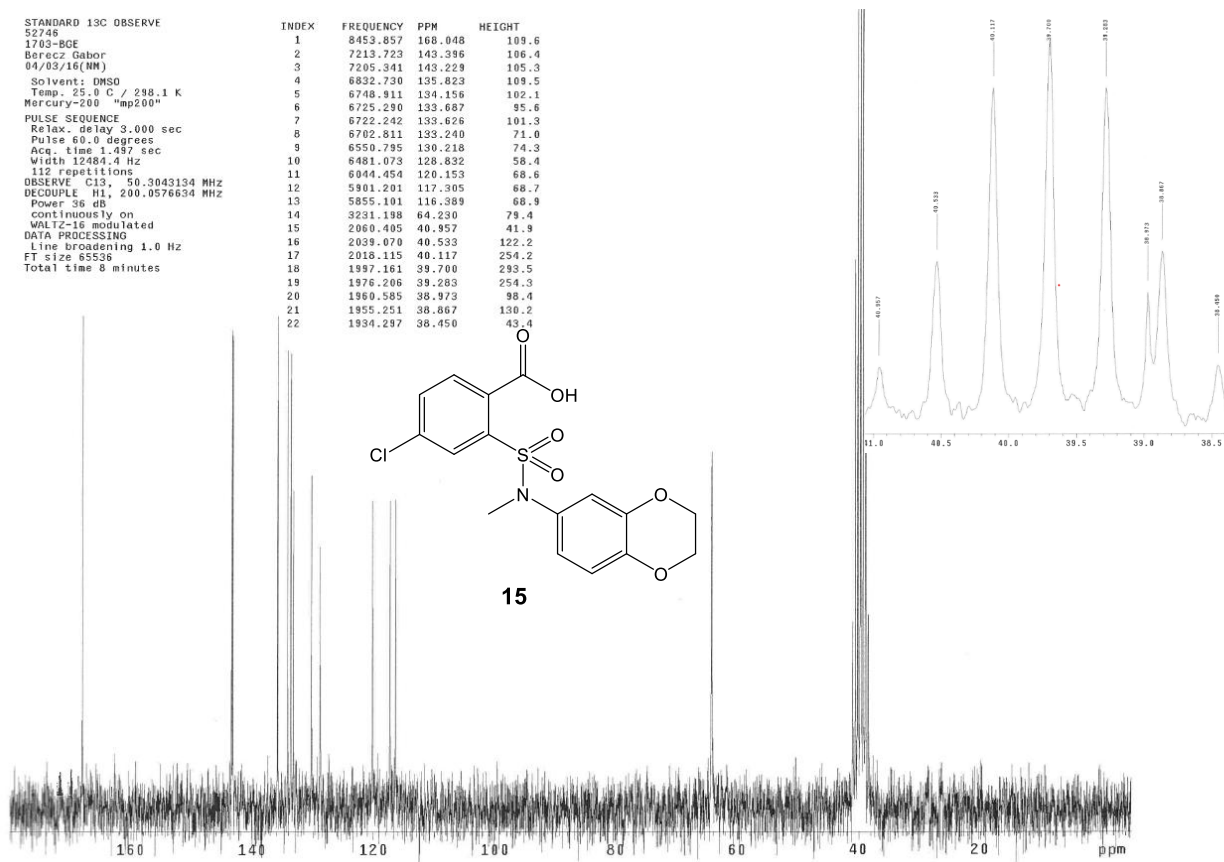

STANDARD PROTON PARAMETERS  
 56570  
 1805-BGE  
 Berecz Gabor  
 2005.02.01. (BM)  
 Solvent: DMSO  
 Temp. 25.0 C / 298.1 K  
 INOVA-500 "1500"  
 PULSE SEQUENCE  
 Relax. delay 3.000 sec  
 Pulse 90.0 degrees  
 Acq. time 5.800 sec  
 Width 8000.0 Hz  
 16 repetitions  
 OBSERVE H1, 499.5268281 MHz  
 DATA PROCESSING  
 FT size 131072  
 Total time 2 minutes

| INDEX | FREQUENCY PPM | HEIGHT |
|-------|---------------|--------|
| 1     | 3931.152      | 7.870  |
| 2     | 3930.542      | 7.869  |
| 3     | 3922.485      | 7.852  |
| 4     | 3921.875      | 7.851  |
| 5     | 3874.268      | 7.756  |
| 6     | 3872.070      | 7.751  |
| 7     | 3850.342      | 7.708  |
| 8     | 3848.145      | 7.704  |
| 9     | 3841.919      | 7.691  |
| 10    | 3839.600      | 7.686  |
| 11    | 3584.351      | 7.175  |
| 12    | 3516.724      | 7.040  |
| 13    | 3300.781      | 6.608  |
| 14    | 3295.776      | 6.598  |
| 15    | 3080.200      | 6.166  |
| 16    | 3075.317      | 6.156  |
| 17    | 3044.067      | 6.094  |
| 18    | 3043.091      | 6.092  |
| 19    | 3015.259      | 6.056  |
| 20    | 3014.282      | 6.034  |
| 21    | 1684.448      | 3.372  |
| 22    | 1676.025      | 3.355  |
| 23    | 1254.639      | 2.512  |
| 24    | 1252.608      | 2.508  |
| 25    | 1250.977      | 2.504  |
| 26    | -0.000        | -0.000 |

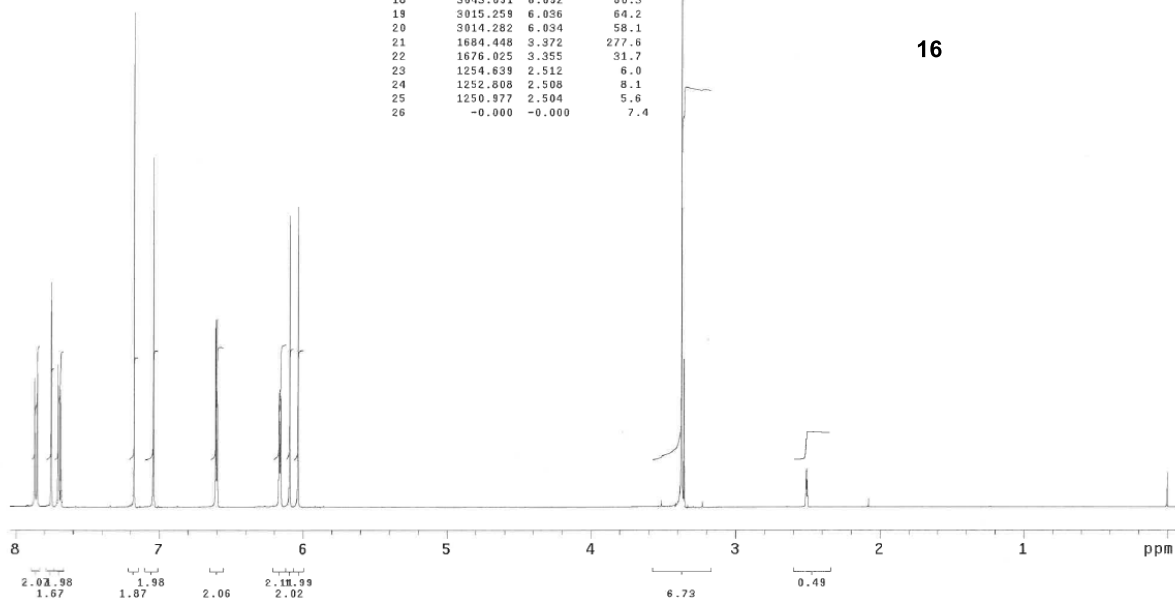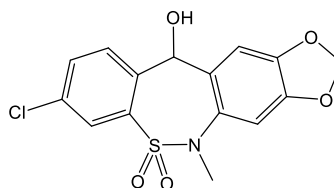

16

STANDARD 13C PARAMETERS  
 56570  
 1805-BGE  
 Berecz Gabor  
 2005.02.01. (BM)  
 Solvent: DMSO  
 Temp. 25.0 C / 298.1 K  
 User: 1-14-07  
 INOVA-500 "1500"  
 PULSE SEQUENCE  
 Relax. delay 3.000 sec  
 Pulse 45.0 degrees  
 Acq. time 1.300 sec  
 Width 32000.0 Hz  
 250 repetitions  
 OBSERVE C13, 125.6061583 MHz  
 DECOUPLE H1, 499.5289374 MHz  
 Power 32 dB  
 continuously on  
 WALTZ-16 modulated  
 Line broadening 1.0 Hz  
 FT size 131072  
 Total time 17 minutes

| INDEX | FREQUENCY PPM | HEIGHT  |
|-------|---------------|---------|
| 1     | 18537.056     | 147.575 |
| 2     | 18506.294     | 147.330 |
| 3     | 17634.224     | 140.387 |
| 4     | 17562.935     | 139.820 |
| 5     | 17376.899     | 138.339 |
| 6     | 16685.493     | 132.834 |
| 7     | 16595.161     | 132.115 |
| 8     | 16204.536     | 129.006 |
| 9     | 16086.860     | 128.069 |
| 10    | 15310.103     | 126.662 |
| 11    | 13653.755     | 108.699 |
| 12    | 13202.095     | 105.103 |
| 13    | 12831.001     | 102.149 |
| 14    | 8479.439      | 67.505  |
| 15    | 5051.216      | 40.213  |
| 16    | 5030.220      | 40.046  |
| 17    | 5009.224      | 39.879  |
| 18    | 4988.228      | 39.712  |
| 19    | 4967.232      | 39.545  |
| 20    | 4946.235      | 39.377  |
| 21    | 4925.239      | 39.210  |
| 22    | 4672.310      | 37.197  |

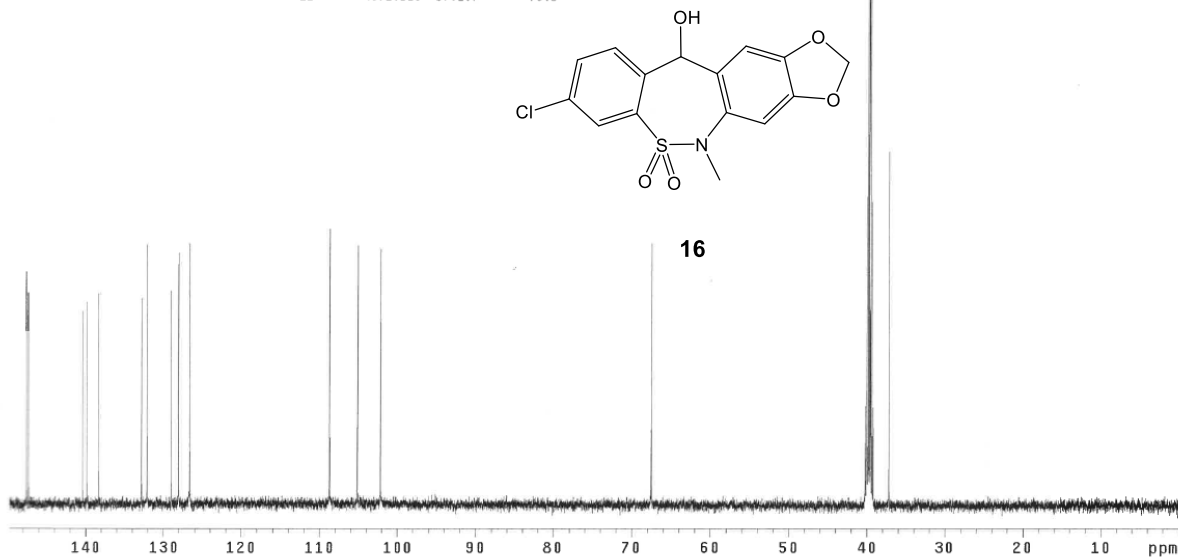

16

STANDARD 1H OBSERVE  
 53886  
 1733-BGE  
 Berecz Gabor  
 04/06/07(NM)  
 Solvent: DMSO  
 Temp. 25.0 C / 298.1 K  
 Mercury-200 "mp200"  
 PULSE SEQUENCE  
 Relax. delay 5.000 sec  
 Pulse 31.5 degrees  
 Acq. time 1.993 sec  
 Width 3003.0 Hz  
 18 repetitions  
 OBSERVE H1, 200.0567147 MHz  
 DATA PROCESSING  
 FT size 16384  
 Total time 1 minutes

| INDEX | FREQUENCY | PPM    | HEIGHT |
|-------|-----------|--------|--------|
| 1     | 1574.450  | 7.870  | 19.7   |
| 2     | 1566.013  | 7.828  | 34.9   |
| 3     | 1550.623  | 7.751  | 33.4   |
| 4     | 1548.790  | 7.742  | 58.0   |
| 5     | 1545.857  | 7.727  | 48.0   |
| 6     | 1543.658  | 7.716  | 20.6   |
| 7     | 1537.426  | 7.685  | 21.5   |
| 8     | 1535.227  | 7.674  | 15.6   |
| 9     | 1410.590  | 7.051  | 121.6  |
| 10    | 1404.725  | 7.022  | 63.0   |
| 11    | 1403.992  | 7.018  | 57.2   |
| 12    | 1308.682  | 6.542  | 15.9   |
| 13    | 1305.383  | 6.525  | 16.3   |
| 14    | 1221.070  | 6.104  | 15.1   |
| 15    | 1218.504  | 6.093  | 14.0   |
| 16    | 848.627   | 4.242  | 177.7  |
| 17    | 672.303   | 3.361  | 3.0    |
| 18    | 671.203   | 3.355  | 4.3    |
| 19    | 668.271   | 3.340  | 139.7  |
| 20    | 665.705   | 3.328  | 292.5  |
| 21    | 662.039   | 3.309  | 4.3    |
| 22    | 594.777   | 2.523  | 9.0    |
| 23    | 592.944   | 2.514  | 18.3   |
| 24    | 501.111   | 2.505  | 25.8   |
| 25    | 499.279   | 2.496  | 17.2   |
| 26    | 497.079   | 2.485  | 7.3    |
| 27    | 415.332   | 2.076  | 8.2    |
| 28    | 0.000     | 0.000  | 42.4   |
| 29    | -0.367    | -0.002 | -4.0   |

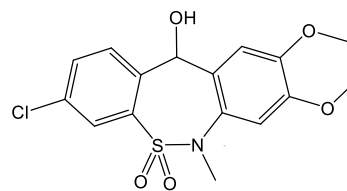

17

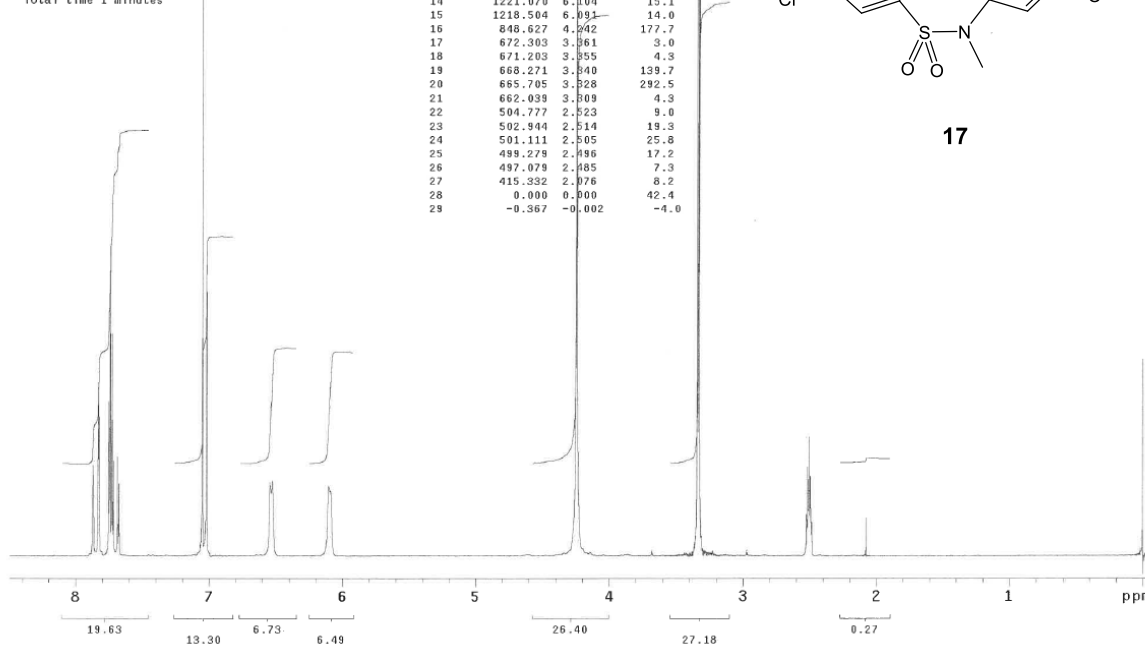

STANDARD 13C OBSERVE  
 53886  
 1733-BGE  
 Berecz Gabor  
 04/06/07(NM)  
 Solvent: DMSO  
 Temp. 25.0 C / 298.1 K  
 Mercury-200 "mp200"  
 PULSE SEQUENCE  
 Relax. delay 3.000 sec  
 Pulse 60.0 degrees  
 Acq. time 1.487 sec  
 Width 12486.0 Hz  
 1300 repetitions  
 OBSERVE C13, 50.3043156 MHz  
 DECOUPLE H1, 200.0576534 MHz  
 Power 36 dB  
 continuously on  
 WALTZ-16 modulated  
 DATA PROCESSING  
 Line broadening 1.0 Hz  
 FT size 65536  
 Total time 37 minutes

| INDEX | FREQUENCY | PPM     | HEIGHT |
|-------|-----------|---------|--------|
| 1     | 7220.200  | 143.525 | 87.5   |
| 2     | 7205.342  | 143.229 | 87.6   |
| 3     | 7059.802  | 140.336 | 114.7  |
| 4     | 7014.464  | 139.435 | 100.2  |
| 5     | 6852.181  | 136.209 | 119.5  |
| 6     | 6678.809  | 132.763 | 116.1  |
| 7     | 6651.758  | 132.225 | 76.7   |
| 8     | 6486.788  | 128.946 | 90.0   |
| 9     | 6471.929  | 128.650 | 70.8   |
| 10    | 6372.490  | 126.674 | 77.3   |
| 11    | 5886.342  | 117.010 | 68.0   |
| 12    | 5747.660  | 114.253 | 68.5   |
| 13    | 3418.266  | 67.949  | 75.1   |
| 14    | 3236.151  | 64.329  | 60.4   |
| 15    | 3231.580  | 64.238  | 58.9   |
| 16    | 2060.025  | 40.950  | 88.4   |
| 17    | 2039.070  | 40.533  | 264.5  |
| 18    | 2018.115  | 40.117  | 527.0  |
| 19    | 1997.161  | 39.700  | 619.5  |
| 20    | 1976.206  | 39.283  | 524.2  |
| 21    | 1955.251  | 38.867  | 264.0  |
| 22    | 1933.916  | 38.443  | 85.2   |
| 23    | 1905.722  | 37.882  | 88.4   |

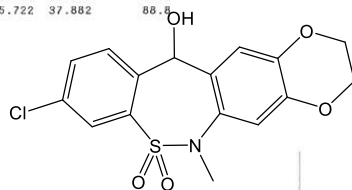

17

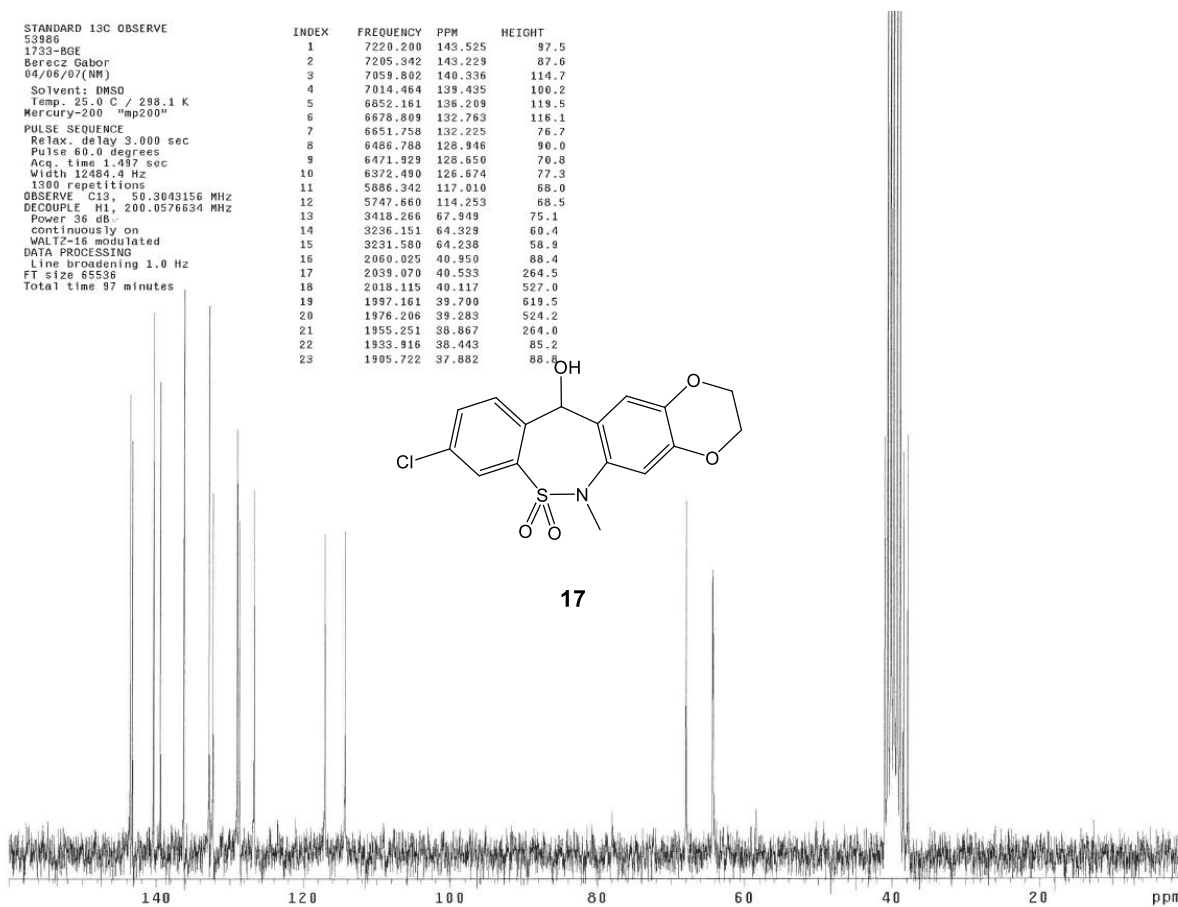



STANDARD PROTON PARAMETERS  
 56593  
 1806-BGE  
 Berecz Gabor  
 2005/02/03 (SzA)  
 Solvent: CDCl3  
 Temp. 25.0 C / 298.1 K  
 INOVA-500 "1500"  
 PULSE SEQUENCE  
 Relax. delay 3.000 sec  
 Pulse 90.0 degrees  
 Acq. time 5.000 sec  
 Width 8000.0 Hz  
 16 repetitions  
 OBSERVE H1, 499.5244698 MHz  
 DATA PROCESSING  
 FT size 131072  
 Total time 2 minutes

| INDEX | FREQUENCY | PPM   | HEIGHT |
|-------|-----------|-------|--------|
| 1     | 3976.929  | 7.961 | 45.6   |
| 2     | 3974.854  | 7.957 | 45.9   |
| 3     | 3738.770  | 7.485 | 23.8   |
| 4     | 3736.572  | 7.480 | 22.1   |
| 5     | 3730.469  | 7.468 | 48.0   |
| 6     | 3728.271  | 7.464 | 48.6   |
| 7     | 3715.698  | 7.438 | 59.2   |
| 8     | 3707.397  | 7.422 | 28.1   |
| 9     | 3625.854  | 7.259 | 115.5  |
| 10    | 3469.482  | 6.946 | 115.5  |
| 11    | 3408.203  | 6.823 | 106.6  |
| 12    | 3025.146  | 6.056 | 54.0   |
| 13    | 3023.804  | 6.053 | 61.0   |
| 14    | 3004.761  | 6.015 | 62.1   |
| 15    | 3003.418  | 6.013 | 52.3   |
| 16    | 2988.281  | 5.982 | 70.1   |
| 17    | 2643.433  | 5.292 | 31.5   |
| 18    | 1758.667  | 3.521 | 423.4  |
| 19    | 1614.990  | 3.293 | 9.3    |
| 20    | 0.000     | 0.000 | 23.8   |

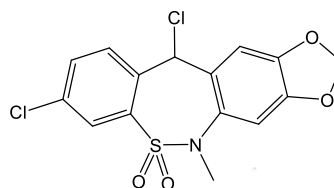

18

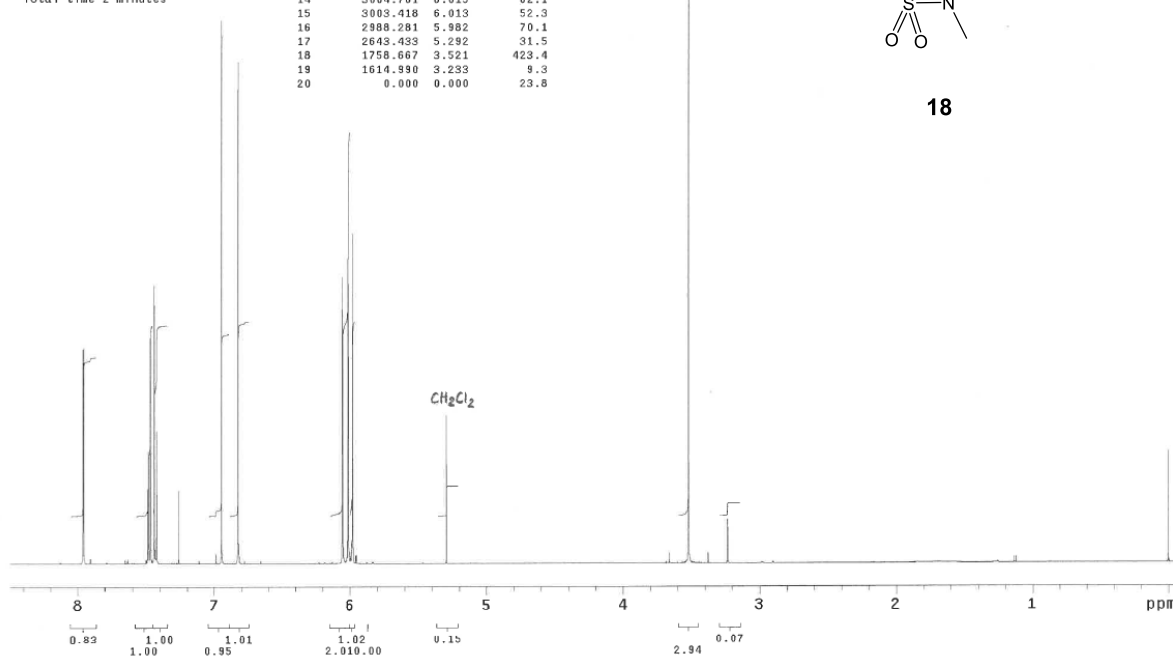

STANDARD CARBON PARAMETERS  
 56593  
 1806-BGE  
 Berecz Gabor  
 2005/02/03 (SzA)  
 Solvent: CDCl3  
 Temp. 25.0 C / 298.1 K  
 User: i-14-87  
 INOVA-500 "1500"  
 PULSE SEQUENCE  
 Relax. delay 3.000 sec  
 Pulse 45.0 degrees  
 Acq. time 1.300 sec  
 Width 32000.0 Hz  
 208 repetitions  
 OBSERVE C13, 125.6055328 MHz  
 DECOUPLE H1, 499.5238647 MHz  
 Power 32 dB  
 continuously on  
 WALTZ-16 modulated  
 DATA PROCESSING  
 Line broadening 1.0 Hz  
 FT size 131072  
 Total time 14 minutes

| INDEX | FREQUENCY | PPM     | HEIGHT |
|-------|-----------|---------|--------|
| 1     | 18814.461 | 143.779 | 61.2   |
| 2     | 18547.371 | 147.652 | 56.3   |
| 3     | 17774.910 | 141.503 | 59.4   |
| 4     | 17104.988 | 136.170 | 68.8   |
| 5     | 16774.422 | 133.538 | 67.9   |
| 6     | 16721.199 | 133.114 | 55.4   |
| 7     | 16642.586 | 132.489 | 137.7  |
| 8     | 16623.054 | 132.333 | 153.2  |
| 9     | 16479.011 | 131.186 | 67.2   |
| 10    | 16085.437 | 127.894 | 156.0  |
| 11    | 13756.355 | 109.512 | 162.1  |
| 12    | 13688.484 | 108.972 | 166.5  |
| 13    | 12879.402 | 102.531 | 168.2  |
| 14    | 9704.597  | 77.257  | 168.8  |
| 15    | 9672.371  | 77.000  | 166.9  |
| 16    | 9640.633  | 76.747  | 169.6  |
| 17    | 7951.668  | 63.302  | 121.4  |
| 18    | 4896.980  | 38.964  | 122.7  |

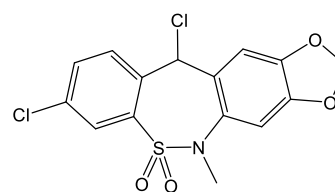

18

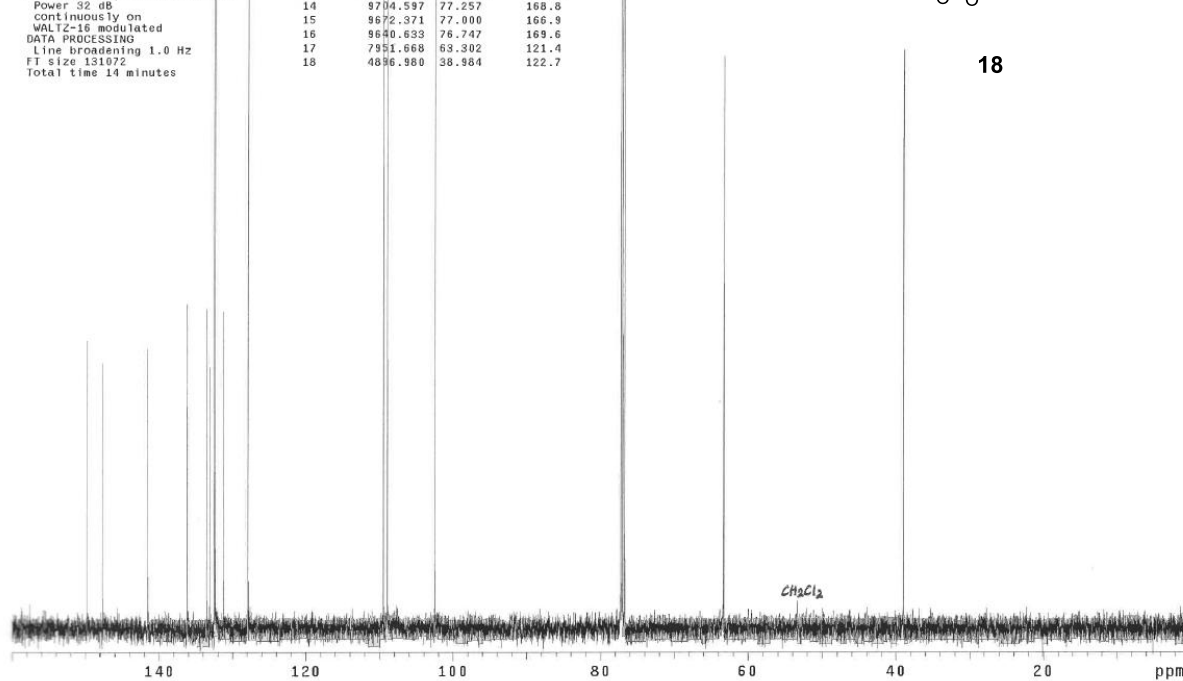

STANDARD 1H OBSERVE  
 54080  
 1734-BGE  
 Berecz Gabor  
 04/06/10(NM)  
 Solvent: CDCl3  
 Temp. 25.0 C / 298.1 K  
 Mercury-200 "mp200"  
 PULSE SEQUENCE  
 Relax. delay 5.000 sec  
 Pulse 31.5 degrees  
 Acq. time 1.993 sec  
 Width 3003.0 Hz  
 16 repetitions  
 OBSERVE H1, 200.0557681 MHz  
 DATA PROCESSING  
 FT size 16384  
 Total time 1 minutes

| INDEX | FREQUENCY | PPM   | HEIGHT |
|-------|-----------|-------|--------|
| 1     | 1595.712  | 7.976 | 20.7   |
| 2     | 1593.879  | 7.967 | 22.0   |
| 3     | 1502.601  | 7.511 | 5.9    |
| 4     | 1500.402  | 7.500 | 5.7    |
| 5     | 1494.170  | 7.469 | 36.0   |
| 6     | 1481.970  | 7.458 | 29.7   |
| 7     | 1480.771  | 7.447 | 35.0   |
| 8     | 1481.340  | 7.405 | 5.7    |
| 9     | 1452.380  | 7.260 | 21.7   |
| 10    | 1404.358  | 7.020 | 58.8   |
| 11    | 1380.897  | 6.903 | 53.9   |
| 12    | 1197.242  | 5.985 | 36.3   |
| 13    | 1059.042  | 5.294 | 11.2   |
| 14    | 857.791   | 4.288 | 3.9    |
| 15    | 856.325   | 4.280 | 6.3    |
| 16    | 852.659   | 4.262 | 194.8  |
| 17    | 850.093   | 4.249 | 10.3   |
| 18    | 848.994   | 4.244 | 5.3    |
| 19    | 847.527   | 4.236 | 3.6    |
| 20    | 708.228   | 3.540 | 2.2    |
| 21    | 706.395   | 3.531 | 4.6    |
| 22    | 704.562   | 3.522 | 237.6  |
| 23    | 703.462   | 3.516 | 10.9   |
| 24    | 701.996   | 3.509 | 4.3    |
| 25    | 700.530   | 3.502 | 2.2    |
| 26    | 629.780   | 3.148 | 7.7    |
| 27    | 0.000     | 0.000 | 24.3   |

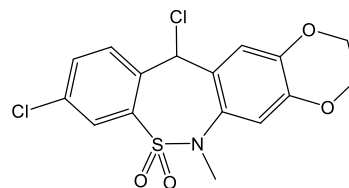

19

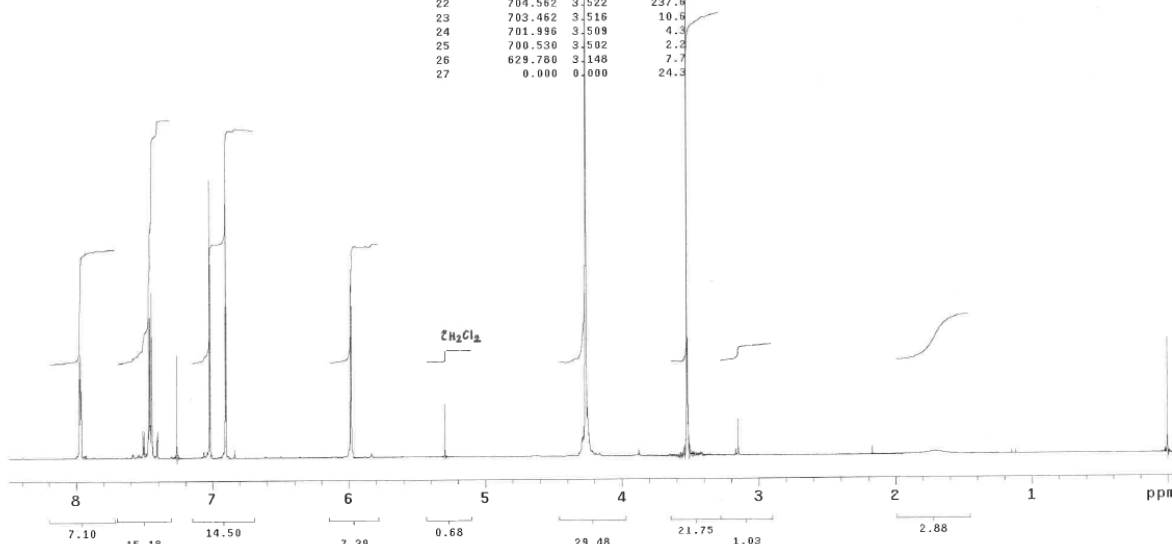

STANDARD 13C OBSERVE  
 54080  
 1734-BGE  
 Berecz Gabor  
 04/06/10(NM)  
 Solvent: CDCl3  
 Temp. 25.0 C / 298.1 K  
 Mercury-200 "mp200"  
 PULSE SEQUENCE  
 Relax. delay 3.000 sec  
 Pulse 60.0 degrees  
 Acq. time 1.457 sec  
 Width 12484.4 Hz  
 285 repetitions  
 OBSERVE C13, 50.3040643 MHz  
 DECOUPLE H1, 200.0567131 MHz  
 Power 36 dB  
 continuously on  
 WALTZ-16 modulated  
 DATA PROCESSING  
 Line broadening 1.0 Hz  
 FT size 65536  
 Total time 19 minutes

| INDEX | FREQUENCY | PPM     | HEIGHT |
|-------|-----------|---------|--------|
| 1     | 7315.606  | 145.417 | 54.8   |
| 2     | 7213.119  | 140.378 | 54.9   |
| 3     | 7128.920  | 141.706 | 47.6   |
| 4     | 6845.841  | 136.079 | 61.0   |
| 5     | 6717.066  | 133.519 | 71.2   |
| 6     | 6675.156  | 132.686 | 99.7   |
| 7     | 6656.869  | 132.322 | 103.2  |
| 8     | 6646.201  | 132.110 | 47.7   |
| 9     | 6553.619  | 130.270 | 63.9   |
| 10    | 6438.559  | 127.983 | 97.3   |
| 11    | 5951.269  | 118.297 | 88.4   |
| 12    | 5948.983  | 118.251 | 81.2   |
| 13    | 3905.715  | 77.636  | 256.9  |
| 14    | 3873.711  | 77.000  | 263.2  |
| 15    | 3841.708  | 76.364  | 249.8  |
| 16    | 3235.928  | 64.322  | 78.6   |
| 17    | 3232.499  | 64.254  | 60.9   |
| 18    | 3189.066  | 63.381  | 84.9   |
| 19    | 1974.840  | 39.255  | 77.8   |

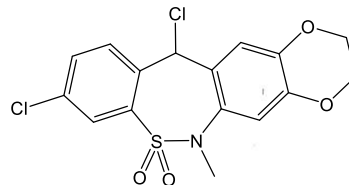

19

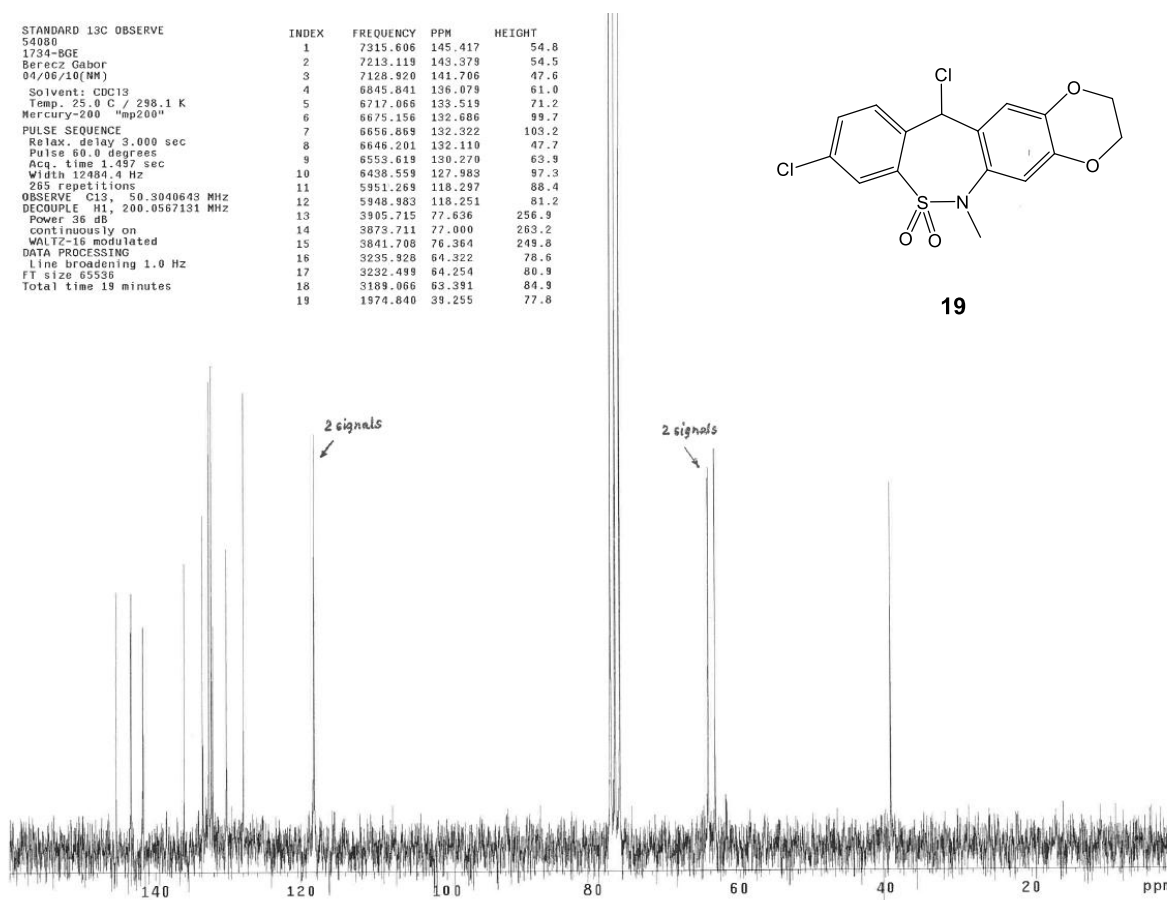

STANDARD 1H  
 63089  
 1955-BGE  
 Berecz Gabor  
 2006.04.20. (BT)  
 Solvent: CDCl3  
 Temp. 25.0 C / 298.1 K  
 INOVA-500 "1500"  
 PULSE SEQUENCE  
 Relax. delay 3.000 sec  
 Pulse 6.4 usec  
 Acq. time 5.000 sec  
 Width 8000.0 Hz  
 15 repetitions  
 OBSERVE H1, 499.5244640 MHz  
 DATA PROCESSING  
 FT size 131072  
 Total time 2 minutes

| INDEX | FREQUENCY | PPM   | HEIGHT |
|-------|-----------|-------|--------|
| 1     | 3954.712  | 7.917 | 22.0   |
| 2     | 3953.003  | 7.914 | 21.9   |
| 3     | 3705.688  | 7.418 | 30.1   |
| 4     | 3703.735  | 7.415 | 45.5   |
| 5     | 3633.179  | 7.273 | 7.5    |
| 6     | 3431.885  | 6.870 | 55.3   |
| 7     | 3394.409  | 6.795 | 49.1   |
| 8     | 2986.694  | 5.979 | 31.8   |
| 9     | 2985.352  | 5.976 | 36.9   |
| 10    | 2981.201  | 5.968 | 39.9   |
| 11    | 2979.858  | 5.965 | 25.7   |
| 12    | 2646.118  | 5.297 | 13.3   |
| 13    | 2645.264  | 5.296 | 31.6   |
| 14    | 2464.600  | 4.934 | 17.9   |
| 15    | 2065.674  | 4.135 | 14.0   |
| 16    | 2058.472  | 4.121 | 43.4   |
| 17    | 2051.392  | 4.107 | 43.8   |
| 18    | 2044.189  | 4.092 | 14.4   |
| 19    | 1688.110  | 3.379 | 148.5  |
| 20    | 1253.784  | 2.510 | 12.8   |
| 21    | 1246.582  | 2.496 | 25.3   |
| 22    | 1239.502  | 2.481 | 14.1   |
| 23    | 1143.311  | 2.289 | 21.8   |
| 24    | 1135.864  | 2.274 | 40.7   |
| 25    | 1128.296  | 2.259 | 23.6   |
| 26    | 880.859   | 1.763 | 18.9   |
| 27    | 809.204   | 1.620 | 18.3   |
| 28    | 802.002   | 1.606 | 13.8   |
| 29    | 794.800   | 1.591 | 9.6    |
| 30    | 757.690   | 1.517 | 7.2    |
| 31    | 750.610   | 1.503 | 11.9   |
| 32    | 743.530   | 1.488 | 9.6    |
| 33    | 661.621   | 1.325 | 26.1   |
| 34    | 656.091   | 1.317 | 23.0   |
| 35    | 654.419   | 1.310 | 22.1   |
| 36    | 651.489   | 1.304 | 11.5   |
| 37    | 628.662   | 1.259 | 50.4   |
| 38    | 622.314   | 1.246 | 47.4   |
| 39    | 621.582   | 1.244 | 98.8   |

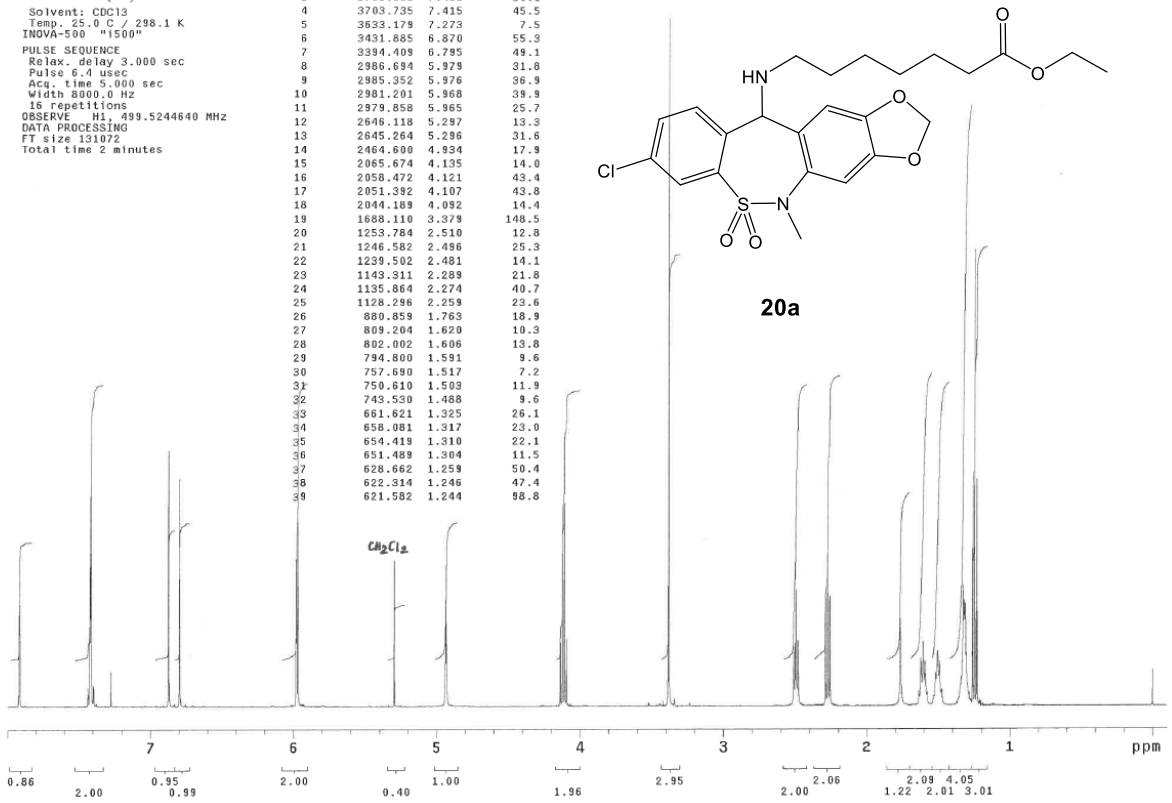

STANDARD 13C  
 63089  
 1955-BGE  
 Berecz Gabor  
 2006.04.20. (BT)  
 Solvent: CDCl3  
 Temp. 25.0 C / 298.1 K  
 User: 1-14-07  
 INOVA-500 "1500"  
 PULSE SEQUENCE  
 Relax. delay 3.000 sec  
 Pulse 6.0 usec  
 Acq. time 1.300 sec  
 Width 32000.0 Hz  
 480 repetitions  
 OBSERVE C13, 125.6055352 MHz  
 DECOUPLE H1, 499.5269647 MHz  
 Power 32 dB  
 continuously on  
 WALTZ-16 modulated  
 DATA PROCESSING  
 Line broadening 0.5 Hz  
 FT size 131072  
 Total time 34 minutes

| INDEX | FREQUENCY | PPM     | HEIGHT |
|-------|-----------|---------|--------|
| 1     | 21810.066 | 179.626 | 47.7   |
| 2     | 18575.691 | 147.878 | 49.7   |
| 3     | 18543.465 | 147.621 | 46.1   |
| 4     | 17677.742 | 140.729 | 27.6   |
| 5     | 17258.308 | 137.390 | 19.4   |
| 6     | 16887.215 | 134.436 | 8.7    |
| 7     | 16848.152 | 134.125 | 45.9   |
| 8     | 16565.437 | 131.074 | 81.5   |
| 9     | 16479.012 | 131.186 | 23.9   |
| 10    | 16317.391 | 128.900 | 11.0   |
| 11    | 16111.336 | 128.259 | 80.7   |
| 12    | 13634.285 | 108.540 | 74.9   |
| 13    | 13564.461 | 107.984 | 14.1   |
| 14    | 12807.137 | 101.955 | 74.3   |
| 15    | 9704.598  | 77.257  | 117.2  |
| 16    | 8672.371  | 77.000  | 118.0  |
| 17    | 8640.633  | 76.747  | 117.7  |
| 18    | 8107.918  | 64.546  | 4.8    |
| 19    | 7551.277  | 60.114  | 78.3   |
| 20    | 6706.062  | 53.386  | 6.2    |
| 21    | 6052.254  | 48.181  | 80.0   |
| 22    | 4790.047  | 38.133  | 35.0   |
| 23    | 4290.047  | 34.152  | 117.4  |
| 24    | 3750.008  | 29.853  | 87.2   |
| 25    | 3629.891  | 28.897  | 120.7  |
| 26    | 3376.473  | 26.879  | 114.8  |
| 27    | 3108.894  | 24.749  | 126.0  |
| 28    | 1781.258  | 14.180  | 90.6   |

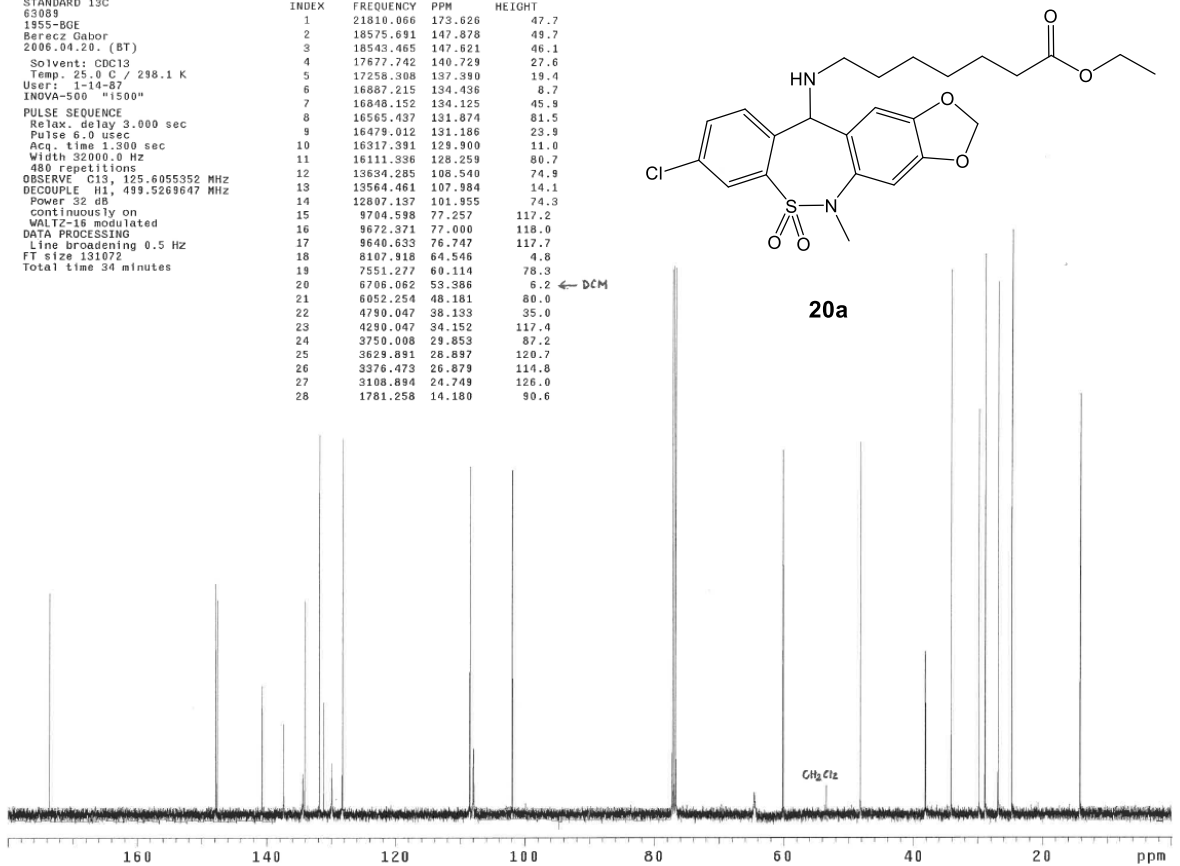

STANDARD 1H  
 63254  
 1959-BGE  
 Berez Gabor  
 2006.05.03.(CzB)  
 Solvent: DMSO  
 Temp. 25.0 C / 298.1 K  
 File: 63254ih  
 INOVA-500 "1500"  
 PULSE SEQUENCE  
 Relax. delay 1.000 sec  
 Pulse 6.4 usec  
 Acq. time 5.000 sec  
 Width 8000.0 Hz  
 18 repetitions  
 OBSERVE H1, 499.5268311 MHz  
 DATA PROCESSING  
 FT size 131072  
 Total time 1 minutes

| INDEX | FREQUENCY PPM | HEIGHT |
|-------|---------------|--------|
| 1     | 3873.169      | 7.754  |
| 2     | 3871.338      | 7.750  |
| 3     | 3843.384      | 7.694  |
| 4     | 3841.167      | 7.690  |
| 5     | 3834.839      | 7.677  |
| 6     | 3832.784      | 7.675  |
| 7     | 3826.050      | 7.653  |
| 8     | 3817.505      | 7.642  |
| 9     | 3570.923      | 7.149  |
| 10    | 3516.235      | 7.039  |
| 11    | 3037.109      | 6.080  |
| 12    | 3036.377      | 6.079  |
| 13    | 3025.757      | 6.057  |
| 14    | 3025.146      | 6.056  |
| 15    | 2554.688      | 5.114  |
| 16    | 1884.570      | 3.372  |
| 17    | 1254.517      | 2.511  |
| 18    | 1228.882      | 2.460  |
| 19    | 1222.412      | 2.447  |
| 20    | 1216.675      | 2.436  |
| 21    | 1210.205      | 2.423  |
| 22    | 1198.853      | 2.400  |
| 23    | 1097.534      | 2.197  |
| 24    | 1090.210      | 2.182  |
| 25    | 1082.886      | 2.168  |
| 26    | 1039.307      | 2.081  |
| 27    | 754.028       | 1.509  |
| 28    | 746.338       | 1.494  |
| 29    | 738.892       | 1.479  |
| 30    | 731.688       | 1.465  |
| 31    | 724.243       | 1.450  |
| 32    | 716.797       | 1.435  |
| 33    | 645.074       | 1.293  |
| 34    | 640.259       | 1.282  |
| 35    | 630.371       | 1.262  |
| 36    | 619.751       | 1.241  |
| 37    | 0.000         | 0.000  |

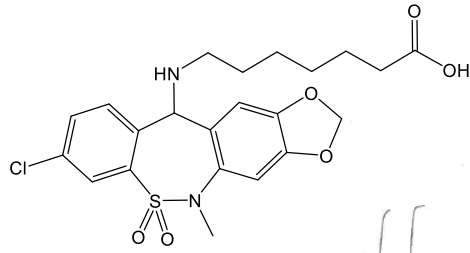

20b

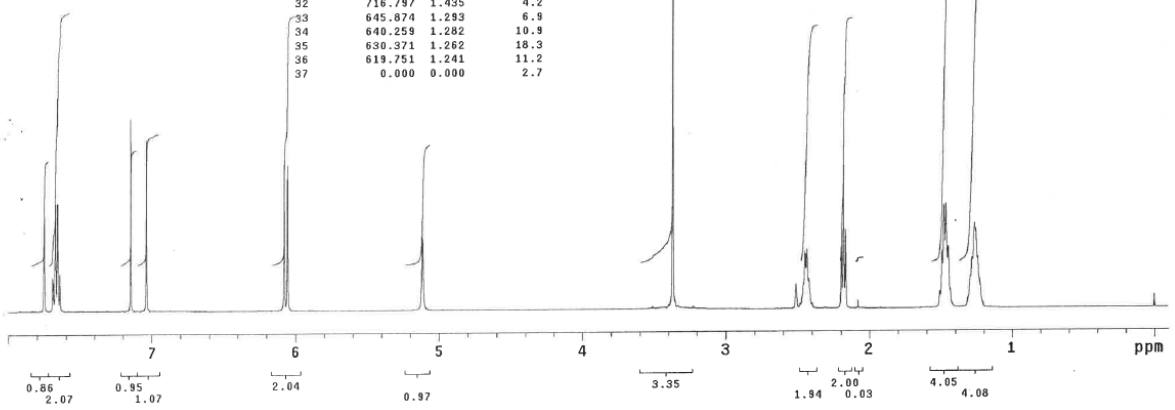

STANDARD 13C  
 63254  
 1959-BGE  
 Berez Gabor  
 2006.05.03.(CzB)  
 Solvent: DMSO  
 Temp. 25.0 C / 298.1 K  
 User: 1-14-87  
 INOVA-500 "1500"  
 PULSE SEQUENCE  
 Relax. delay 3.000 sec  
 Pulse 6.0 usec  
 Acq. time 1.300 sec  
 Width 32000.0 Hz  
 1299 repetitions  
 OBSERVE C13, 125.6061572 MHz  
 DECOUPLE H1, 499.5293374 MHz  
 Power 32 dB  
 continuously on  
 WALTZ-16 modulated  
 DATA PROCESSING  
 Line broadening 2.0 Hz  
 FT size 131072  
 Total time 95 minutes

| INDEX | FREQUENCY PPM | HEIGHT  |
|-------|---------------|---------|
| 1     | 21941.841     | 174.681 |
| 2     | 18516.059     | 147.408 |
| 3     | 18512.153     | 147.377 |
| 4     | 17748.491     | 141.297 |
| 5     | 17403.755     | 138.553 |
| 6     | 17074.165     | 135.929 |
| 7     | 16677.680     | 132.772 |
| 8     | 16576.118     | 131.964 |
| 9     | 16432.563     | 130.821 |
| 10    | 15935.005     | 126.860 |
| 11    | 13701.606     | 109.030 |
| 12    | 13487.739     | 107.377 |
| 13    | 12834.507     | 102.180 |
| 14    | 7787.055      | 61.893  |
| 15    | 5996.528      | 47.739  |
| 16    | 5049.751      | 40.201  |
| 17    | 5028.755      | 40.034  |
| 18    | 5007.753      | 39.867  |
| 19    | 4986.752      | 39.700  |
| 20    | 4965.786      | 39.533  |
| 21    | 4944.770      | 39.366  |
| 22    | 4924.262      | 39.202  |
| 23    | 4751.411      | 37.826  |
| 24    | 4247.016      | 33.811  |
| 25    | 3701.118      | 29.465  |
| 26    | 3603.462      | 28.667  |
| 27    | 3357.386      | 26.728  |
| 28    | 3097.114      | 24.656  |

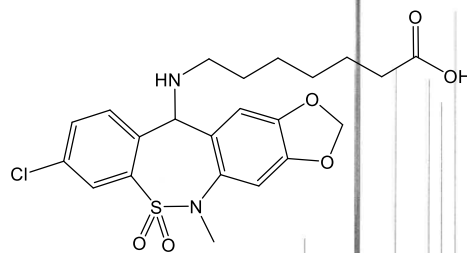

20b

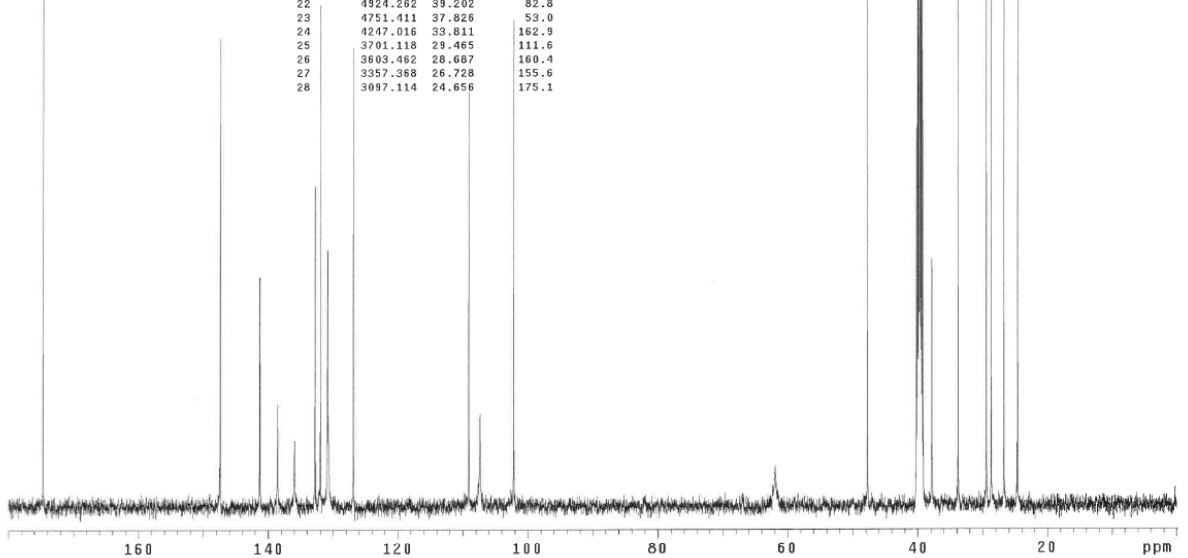

STANDARD 1H  
 S9563  
 1887-BGE  
 Berecz Gabor  
 2005.09.12. (CzB)  
 Solvent: CDC13  
 Temp. 25.0 C / 298.1 K  
 INOVA-500 "1500"  
 PULSE SEQUENCE  
 Relax. delay 3.000 sec  
 Pulse 6.4 usec  
 Acq. time 5.000 sec  
 Width 8000.0 Hz  
 16 repetitions  
 OBSERVE H1, 499.5244691 MHz  
 DATA PROCESSING  
 FT size 131072  
 Total time 2 minutes

| INDEX | FREQUENCY PPM | HEIGHT |
|-------|---------------|--------|
| 1     | 3960.571      | 22.2   |
| 2     | 3958.496      | 21.6   |
| 3     | 3717.529      | 7.6    |
| 4     | 3715.454      | 6.8    |
| 5     | 3709.106      | 7.425  |
| 6     | 3707.153      | 7.421  |
| 7     | 3701.294      | 7.410  |
| 8     | 3692.993      | 7.393  |
| 9     | 3629.150      | 7.265  |
| 10    | 3431.152      | 6.869  |
| 11    | 3399.902      | 6.806  |
| 12    | 2987.915      | 5.982  |
| 13    | 2986.816      | 5.979  |
| 14    | 2981.445      | 5.969  |
| 15    | 2980.225      | 5.966  |
| 16    | 2406.992      | 4.819  |
| 17    | 1681.396      | 3.366  |
| 18    | 1186.157      | 2.375  |
| 19    | 998.047       | 1.998  |
| 20    | 928.711       | 1.859  |
| 21    | 928.955       | 1.860  |
| 22    | 0.000         | 0.000  |

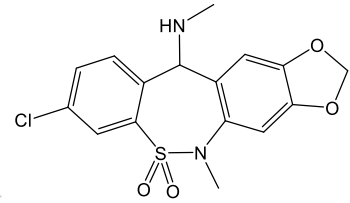

20c

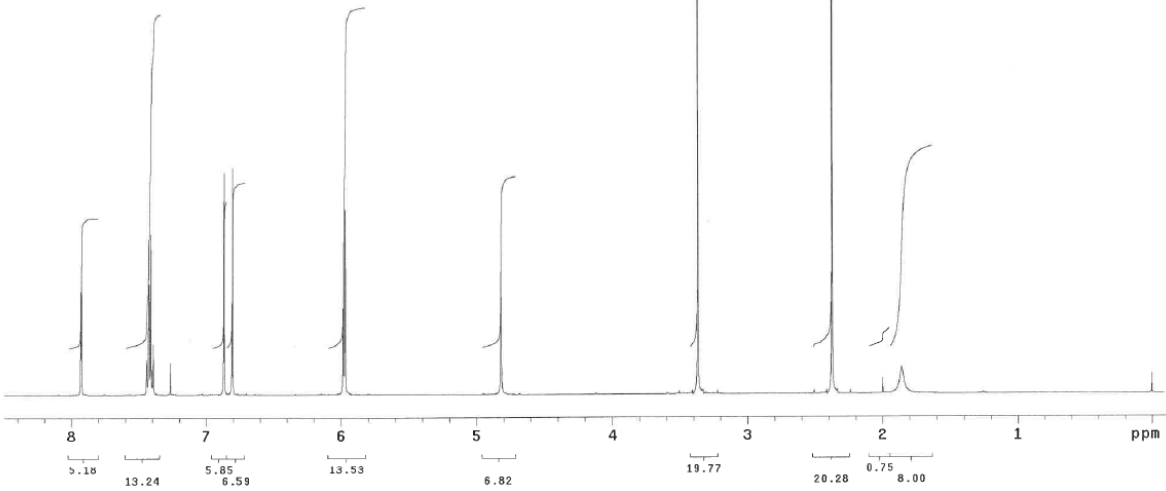

STANDARD 13C  
 S9563  
 1887-BGE  
 Berecz Gabor  
 2005.09.12. (CzB)  
 Solvent: CDC13  
 Temp. 25.0 C / 298.1 K  
 User: 1-14-87  
 INOVA-500 "1500"  
 PULSE SEQUENCE  
 Relax. delay 3.000 sec  
 Pulse 6.0 usec  
 Acq. time 1.300 sec  
 Width 32000.0 Hz  
 752 repetitions  
 OBSERVE C13, 125.6055328 MHz  
 DECOUPLE H1, 499.5269647 MHz  
 Power 32 dB  
 continuously on  
 WALTZ-16 modulated  
 DATA PROCESSING  
 Line broadening 0.5 Hz  
 FT size 131072  
 Total time 53 minutes

| INDEX | FREQUENCY PPM | HEIGHT  |
|-------|---------------|---------|
| 1     | 18586.433     | 147.963 |
| 2     | 18595.906     | 147.641 |
| 3     | 17672.371     | 140.687 |
| 4     | 17204.109     | 136.959 |
| 5     | 16862.800     | 134.242 |
| 6     | 16810.066     | 133.822 |
| 7     | 16568.367     | 131.898 |
| 8     | 16498.543     | 131.342 |
| 9     | 16393.289     | 130.106 |
| 10    | 16123.054     | 128.359 |
| 11    | 13629.890     | 108.505 |
| 12    | 13595.222     | 108.229 |
| 13    | 12811.531     | 101.990 |
| 14    | 9704.597      | 77.257  |
| 15    | 9672.859      | 77.004  |
| 16    | 9640.833      | 76.747  |
| 17    | 8355.476      | 66.516  |
| 18    | 4799.324      | 38.207  |
| 19    | 4394.539      | 34.984  |

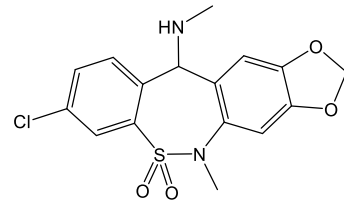

20c

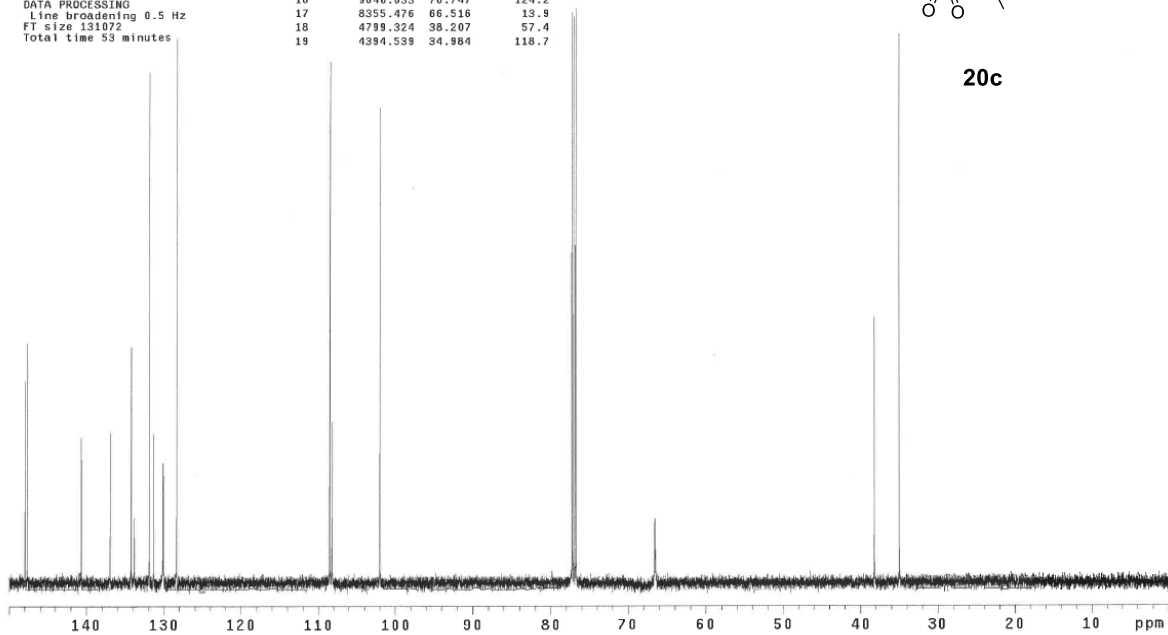

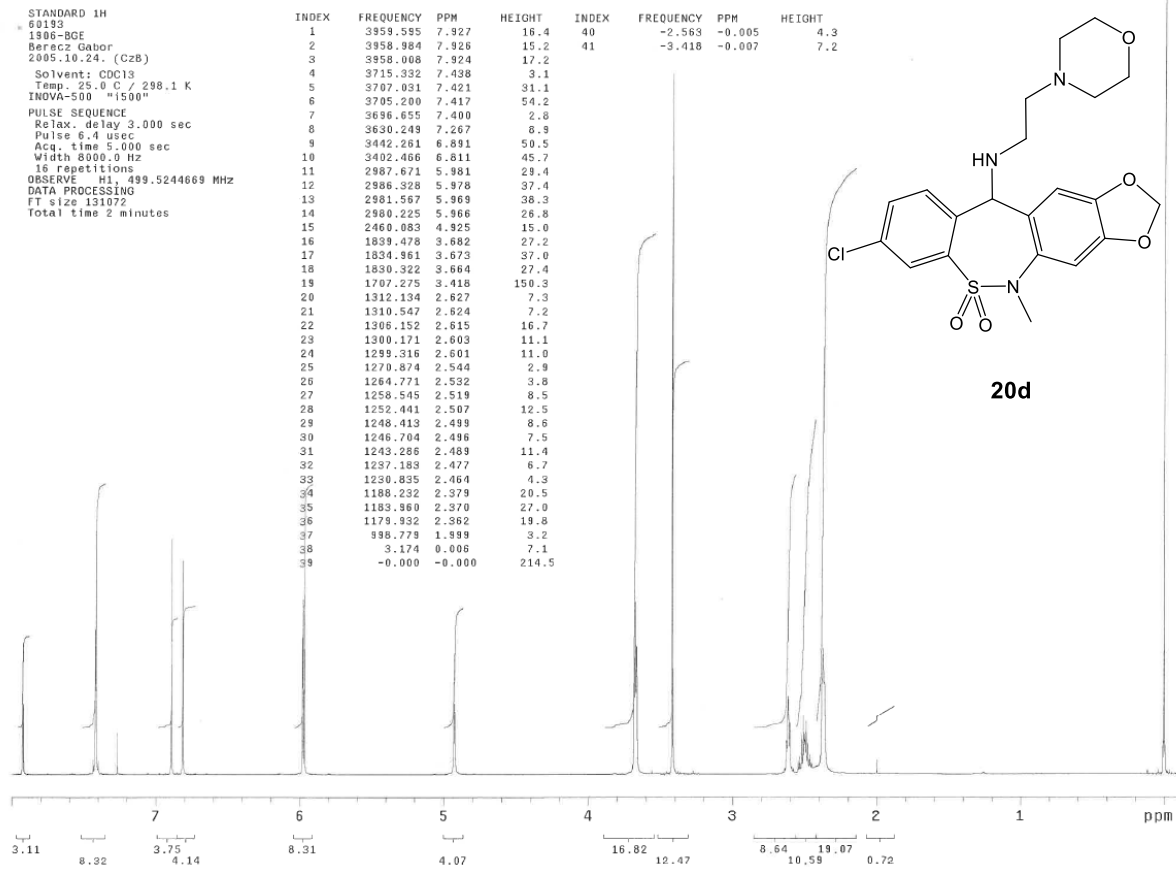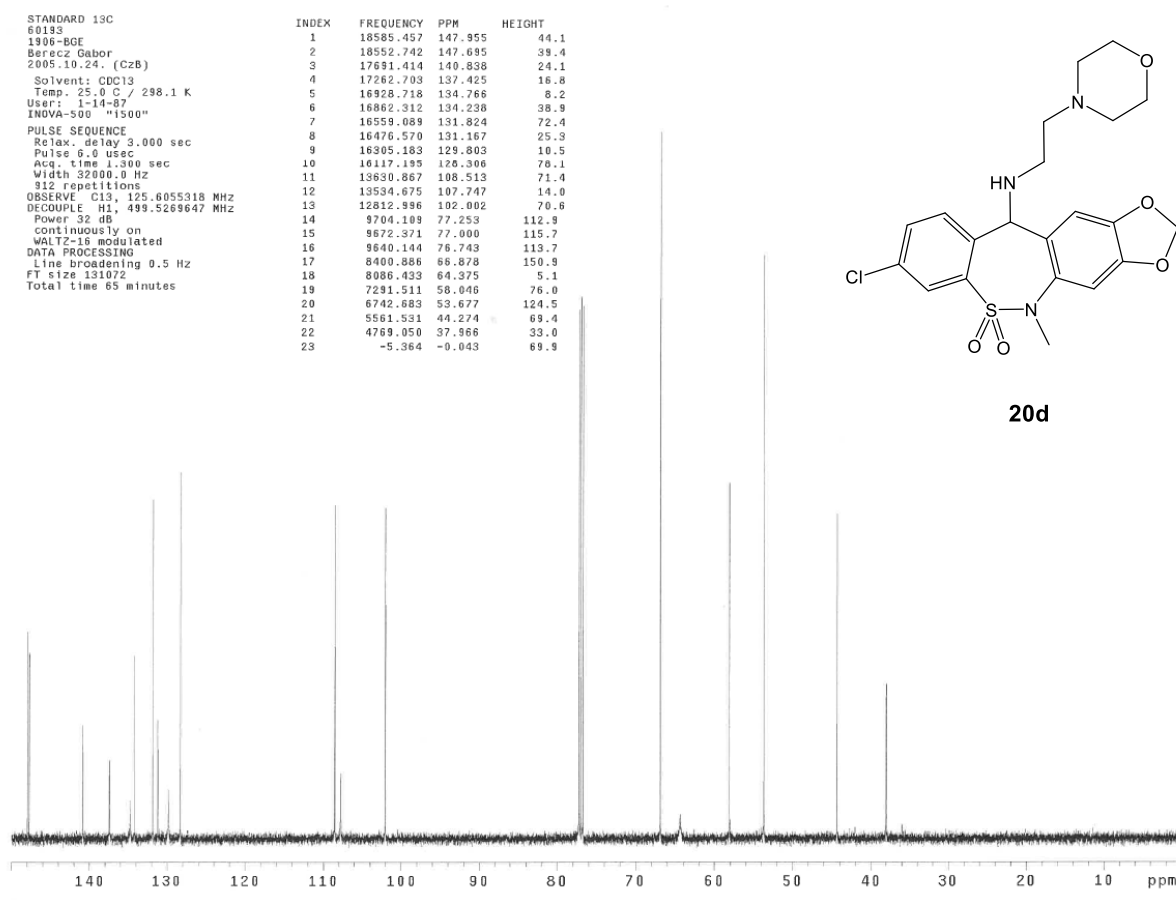

STANDARD PROTON PARAMETERS  
 56634  
 1807-BGE  
 Berez Gabor  
 2004.02.07. (DA)  
 Solvent: CDC13  
 Temp. 25.0 C / 298.1 K  
 INOVA-500 "1500"  
 PULSE SEQUENCE  
 Pulse 90.0 degrees  
 Acq. time 5.000 sec  
 Width 8000.0 Hz  
 16 repetitions  
 OBSERVE H1, 499.5244661 MHz  
 DATA PROCESSING  
 FT size 131072  
 Total time 1 minute

| INDEX | FREQUENCY | PPM   | HEIGHT |
|-------|-----------|-------|--------|
| 1     | 3958.740  | 7.925 | 41.1   |
| 2     | 3956.543  | 7.921 | 41.7   |
| 3     | 3680.908  | 7.369 | 26.9   |
| 4     | 3679.711  | 7.364 | 26.0   |
| 5     | 3672.607  | 7.352 | 46.1   |
| 6     | 3670.410  | 7.348 | 46.2   |
| 7     | 3649.170  | 7.305 | 34.9   |
| 8     | 3640.869  | 7.289 | 21.2   |
| 9     | 3627.808  | 7.263 | 11.9   |
| 10    | 3441.772  | 6.890 | 101.7  |
| 11    | 3370.850  | 6.748 | 97.9   |
| 12    | 3002.319  | 6.010 | 66.6   |
| 13    | 3000.977  | 6.008 | 69.6   |
| 14    | 2973.022  | 5.952 | 88.1   |
| 15    | 2971.558  | 5.949 | 80.6   |
| 16    | 2023.438  | 4.051 | 9.4    |
| 17    | 1798.828  | 3.601 | 2.1    |
| 18    | 1749.146  | 3.502 | 4.5    |
| 19    | 1729.126  | 3.462 | 421.1  |
| 20    | 1657.104  | 3.317 | 2.1    |
| 21    | 1131.104  | 2.264 | 26.7   |
| 22    | 1093.750  | 2.190 | 18.6   |
| 23    | 987.070   | 1.996 | 2.5    |
| 24    | 861.328   | 1.724 | 3.4    |
| 25    | 853.394   | 1.708 | 30.7   |
| 26    | 849.854   | 1.701 | 48.7   |
| 27    | 847.046   | 1.696 | 91.6   |
| 28    | 844.116   | 1.690 | 48.1   |
| 29    | 840.576   | 1.683 | 29.5   |
| 30    | 832.886   | 1.667 | 3.5    |
| 31    | 799.438   | 1.600 | 4.4    |
| 32    | 0.000     | 0.000 | 25.6   |

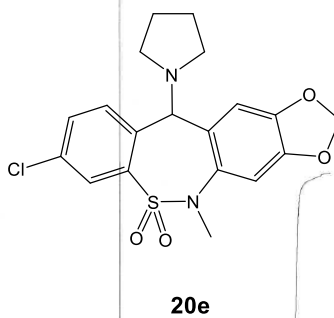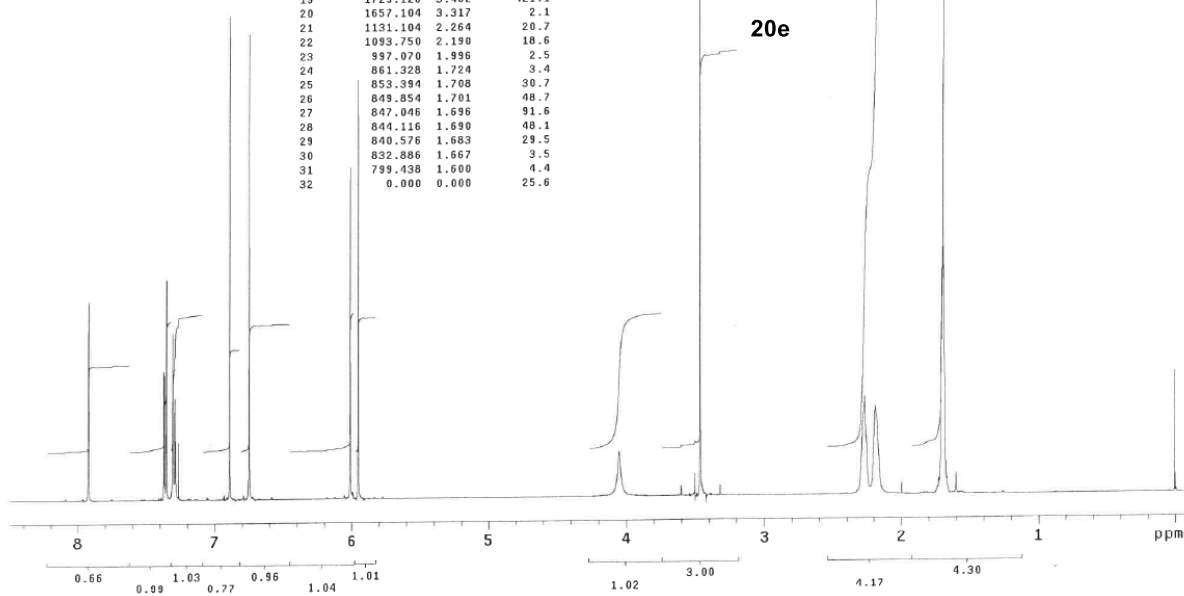

STANDARD 13C PARAMETERS  
 56634  
 1807-BGE  
 Berez Gabor  
 2004.02.07. (DA)  
 Solvent: CDC13  
 Temp. 25.0 C / 298.1 K  
 User: 1-14-07  
 INOVA-500 "1500"  
 PULSE SEQUENCE  
 Relax. delay 3.000 sec  
 Pulse 45.0 degrees  
 Acq. time 1.300 sec  
 Width 32000.0 Hz  
 1848 repetitions  
 OBSERVE C13, 125.6055323 MHz  
 DECOUPLE H1, 499.5269647 MHz  
 Power 32 dB  
 continuous ly on  
 WALTZ-16 modulated  
 DATA PROCESSING  
 Line broadening 1.0 Hz  
 FT size 131072  
 Total time 118 minutes

| INDEX | FREQUENCY | PPM     | HEIGHT |
|-------|-----------|---------|--------|
| 1     | 18615.730 | 148.196 | 33.9   |
| 2     | 18545.418 | 147.637 | 69.8   |
| 3     | 17933.113 | 142.762 | 5.4    |
| 4     | 17051.765 | 135.746 | 6.0    |
| 5     | 17023.445 | 135.521 | 14.4   |
| 6     | 16942.879 | 134.879 | 25.0   |
| 7     | 16556.746 | 132.601 | 9.3    |
| 8     | 16478.523 | 131.183 | 25.4   |
| 9     | 16463.875 | 131.066 | 96.3   |
| 10    | 16106.453 | 128.221 | 149.9  |
| 11    | 13898.445 | 110.643 | 30.6   |
| 12    | 13734.871 | 109.341 | 23.1   |
| 13    | 12819.832 | 102.056 | 149.0  |
| 14    | 9704.597  | 77.257  | 167.6  |
| 15    | 9672.371  | 77.000  | 177.4  |
| 16    | 9640.832  | 76.747  | 170.3  |
| 17    | 9545.418  | 75.989  | 4.8    |
| 18    | 6746.590  | 53.708  | 300.9  |
| 19    | 4971.199  | 39.575  | 13.6   |
| 20    | 2912.605  | 23.187  | 289.9  |
| 21    | -4.875    | -0.039  | 5.7    |

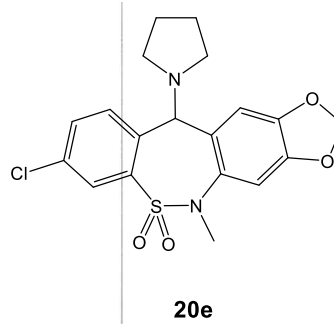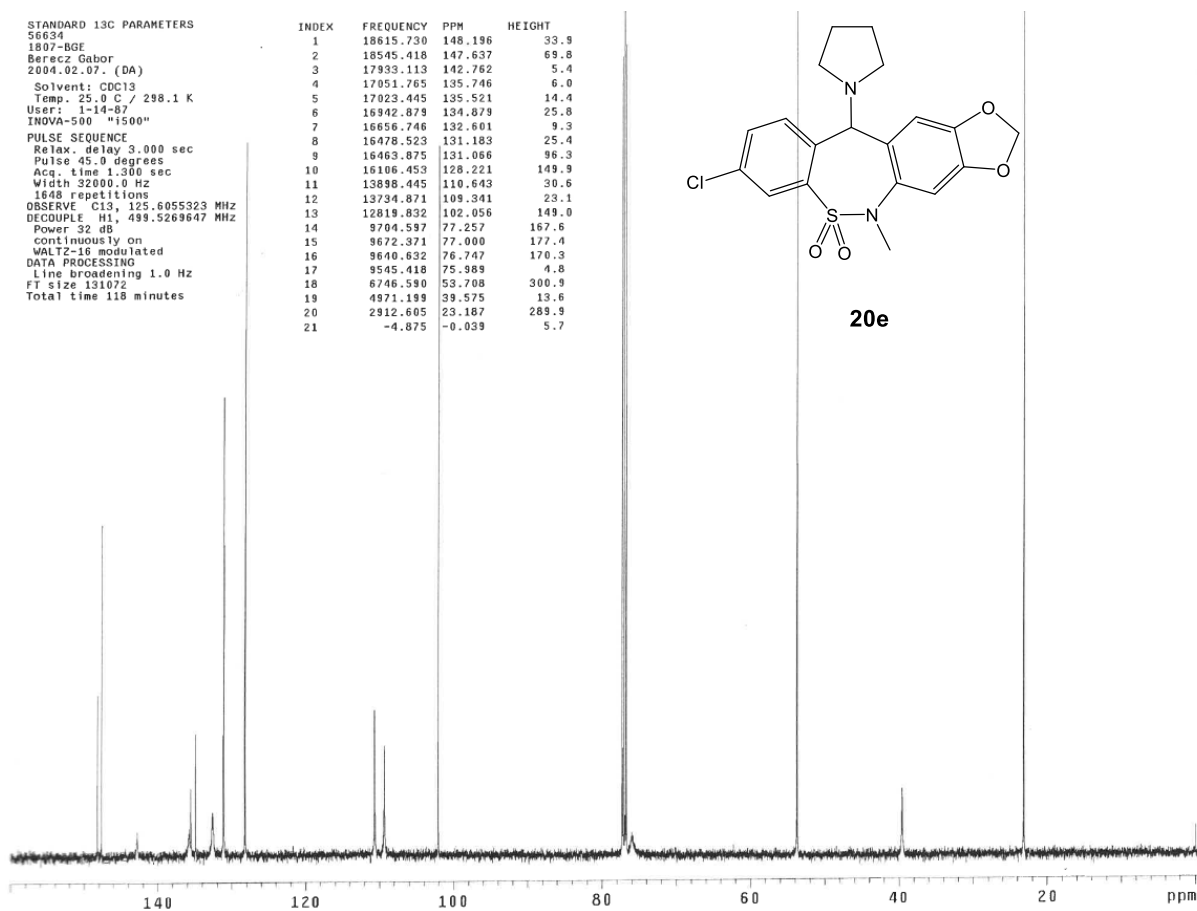

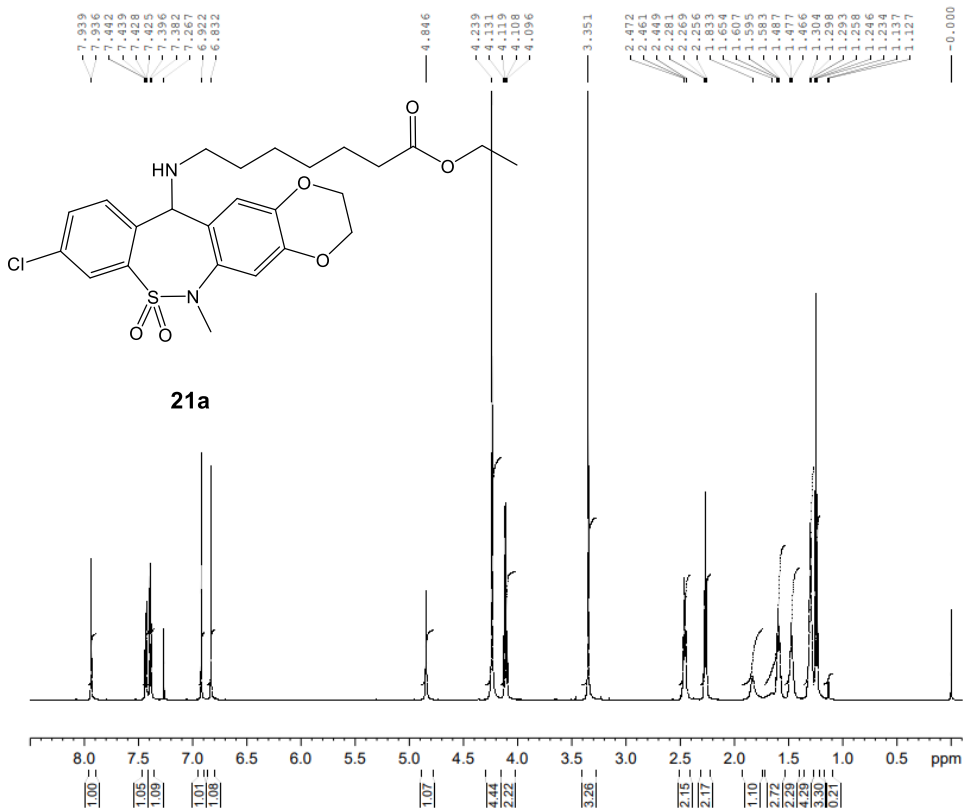

Standard 1H  
144404  
bge-1768-1768-BGE\_1  
Berez Gabor  
2025.03.19. (KP)

Current Data Parameters  
NAME 144404  
EXPNO 11  
PROCNO 1

F2 - Acquisition Parameters  
Date\_ 20250319  
Time 19.08 h  
INSTRUM spect  
PROBHD Z145856\_0002 ( )  
PULPROG zg30  
TD 65536  
SOLVENT CDCl3  
NS 16  
DS 2  
SWH 12019.230 Hz  
FIDRES 0.366798 Hz  
AQ 2.7262976 sec  
RG 111.4  
DW 41.600 usec  
DE 25.00 usec  
TE 295.0 K  
D1 1.00000000 sec  
TDO  
SFO1 600.0037050 MHz  
NUC1 1H  
P1 11.50 usec  
PLW1 28.00000000 W

F2 - Processing parameters  
SI 65536  
SF 600.0000098 MHz  
WDW EM  
SSB 0  
LB 0.30 Hz  
GB 0  
PC 1.00

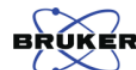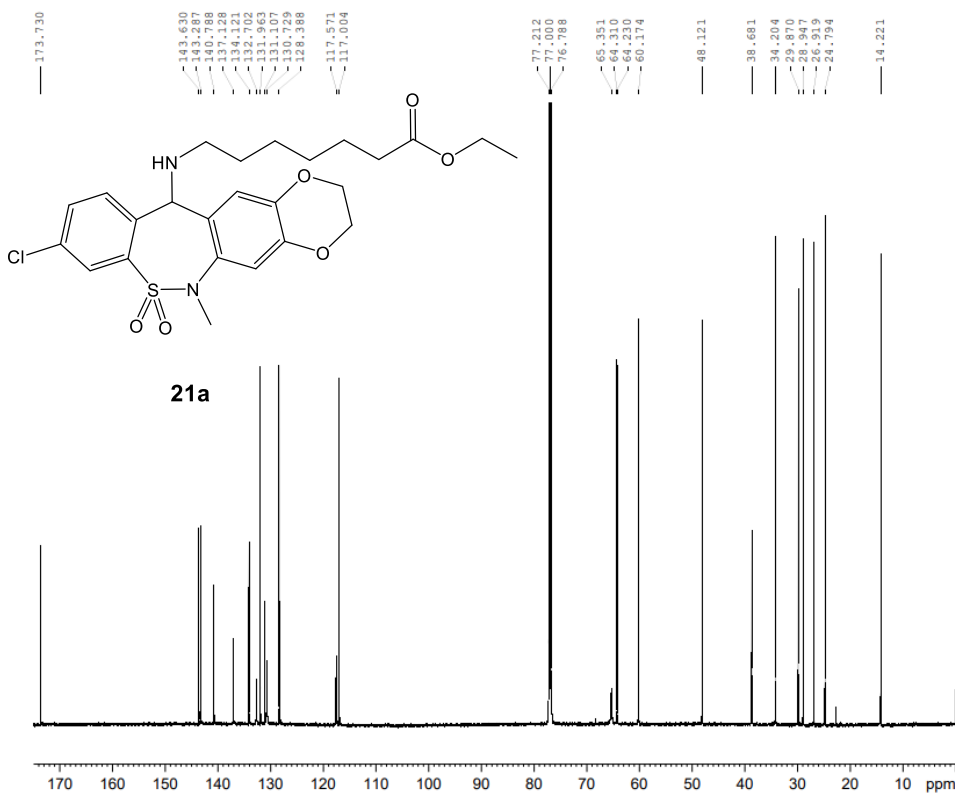

Standard 13C  
144404  
bge-1768-1768-BGE\_1  
Berez Gabor  
2025.03.19. (KP)

Current Data Parameters  
NAME 144404  
EXPNO 12  
PROCNO 1

F2 - Acquisition Parameters  
Date\_ 20250319  
Time 20.16 h  
INSTRUM spect  
PROBHD Z145856\_0002 ( )  
PULPROG zgpg30  
TD 65536  
SOLVENT CDCl3  
NS 2048  
DS 4  
SWH 36231.883 Hz  
FIDRES 1.105709 Hz  
AQ 0.9043968 sec  
RG 196.07  
DW 13.800 usec  
DE 18.00 usec  
TE 295.0 K  
D1 1.00000000 sec  
D11 0.03000000 sec  
TDO  
SFO1 150.8852070 MHz  
NUC1 13C  
P1 9.80 usec  
PLW1 72.69999695 W  
SFO2 600.0024000 MHz  
NUC2 1H  
CPDPRG2 waltz16  
PCPD2 80.00 usec  
PLW2 32.50000000 W  
PLW12 0.70708001 W  
PLW13 0.35508999 W

F2 - Processing parameters  
SI 131072  
SF 150.8701288 MHz  
WDW EM  
SSB 0  
LB 1.00 Hz  
GB 0  
PC 1.40

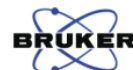



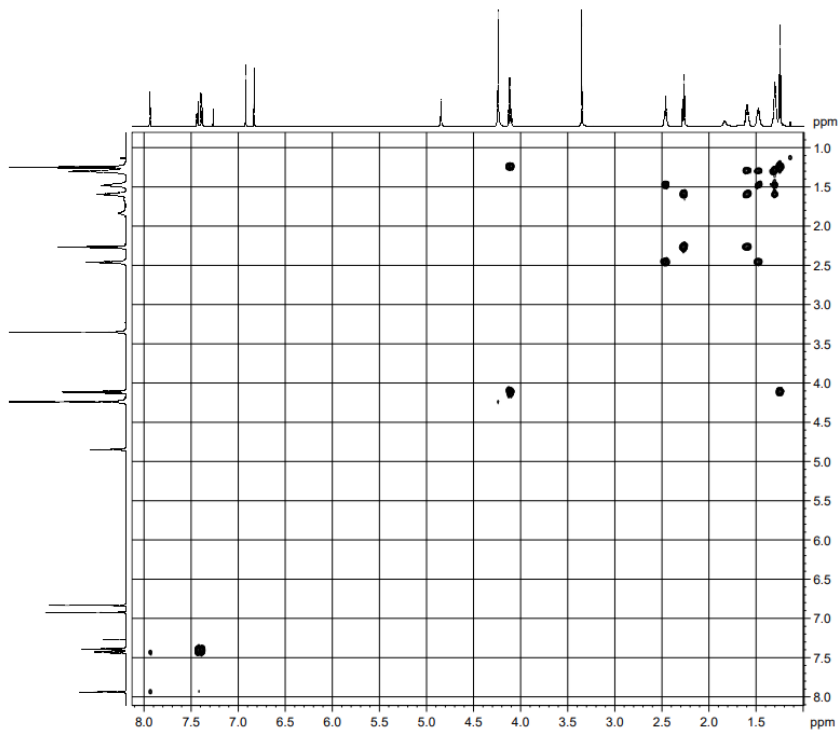

COSY **21a**  
 144404  
 bge-1768-1768-BGE\_1  
 Berecz Gabor  
 2025.03.19. (KP)

```

Current Data Parameters
NAME      144404
EXPNO    13
PROCNO   1

F2 - Acquisition Parameters
Date_     20250319
Time     20:18 h
INSTRUM  spect
PROBHD   zgpg30z
PULPROG  zgpg30z
TD        32768
SOLVENT  DMSO-d6
NS        2
DS        4
SWH       7811.100 Hz
FIDRES    0.429395 Hz
AQ        0.1117770 sec
RG        198.07
DE        64.000000 sec
TE        29.00 sec
TEOP      295.0 K
DQ        0.0000000 sec
SI        2.0000000 sec
SFO       600.136000 MHz
D10       0.0000000 sec
D11       0.0000000 sec
D12       0.0000000 sec
D13       0.0000000 sec
D14       0.0000000 sec
D15       0.0000000 sec
D16       0.0000000 sec
D17       0.0000000 sec
D18       0.0000000 sec
D19       0.0000000 sec
D20       0.0000000 sec
D21       0.0000000 sec
D22       0.0000000 sec
D23       0.0000000 sec
D24       0.0000000 sec
D25       0.0000000 sec
D26       0.0000000 sec
D27       0.0000000 sec
D28       0.0000000 sec
D29       0.0000000 sec
D30       0.0000000 sec
D31       0.0000000 sec
D32       0.0000000 sec
D33       0.0000000 sec
D34       0.0000000 sec
D35       0.0000000 sec
D36       0.0000000 sec
D37       0.0000000 sec
D38       0.0000000 sec
D39       0.0000000 sec
D40       0.0000000 sec
D41       0.0000000 sec
D42       0.0000000 sec
D43       0.0000000 sec
D44       0.0000000 sec
D45       0.0000000 sec
D46       0.0000000 sec
D47       0.0000000 sec
D48       0.0000000 sec
D49       0.0000000 sec
D50       0.0000000 sec
D51       0.0000000 sec
D52       0.0000000 sec
D53       0.0000000 sec
D54       0.0000000 sec
D55       0.0000000 sec
D56       0.0000000 sec
D57       0.0000000 sec
D58       0.0000000 sec
D59       0.0000000 sec
D60       0.0000000 sec
D61       0.0000000 sec
D62       0.0000000 sec
D63       0.0000000 sec
D64       0.0000000 sec
D65       0.0000000 sec
D66       0.0000000 sec
D67       0.0000000 sec
D68       0.0000000 sec
D69       0.0000000 sec
D70       0.0000000 sec
D71       0.0000000 sec
D72       0.0000000 sec
D73       0.0000000 sec
D74       0.0000000 sec
D75       0.0000000 sec
D76       0.0000000 sec
D77       0.0000000 sec
D78       0.0000000 sec
D79       0.0000000 sec
D80       0.0000000 sec
D81       0.0000000 sec
D82       0.0000000 sec
D83       0.0000000 sec
D84       0.0000000 sec
D85       0.0000000 sec
D86       0.0000000 sec
D87       0.0000000 sec
D88       0.0000000 sec
D89       0.0000000 sec
D90       0.0000000 sec
D91       0.0000000 sec
D92       0.0000000 sec
D93       0.0000000 sec
D94       0.0000000 sec
D95       0.0000000 sec
D96       0.0000000 sec
D97       0.0000000 sec
D98       0.0000000 sec
D99       0.0000000 sec
D100      0.0000000 sec
  
```

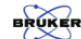



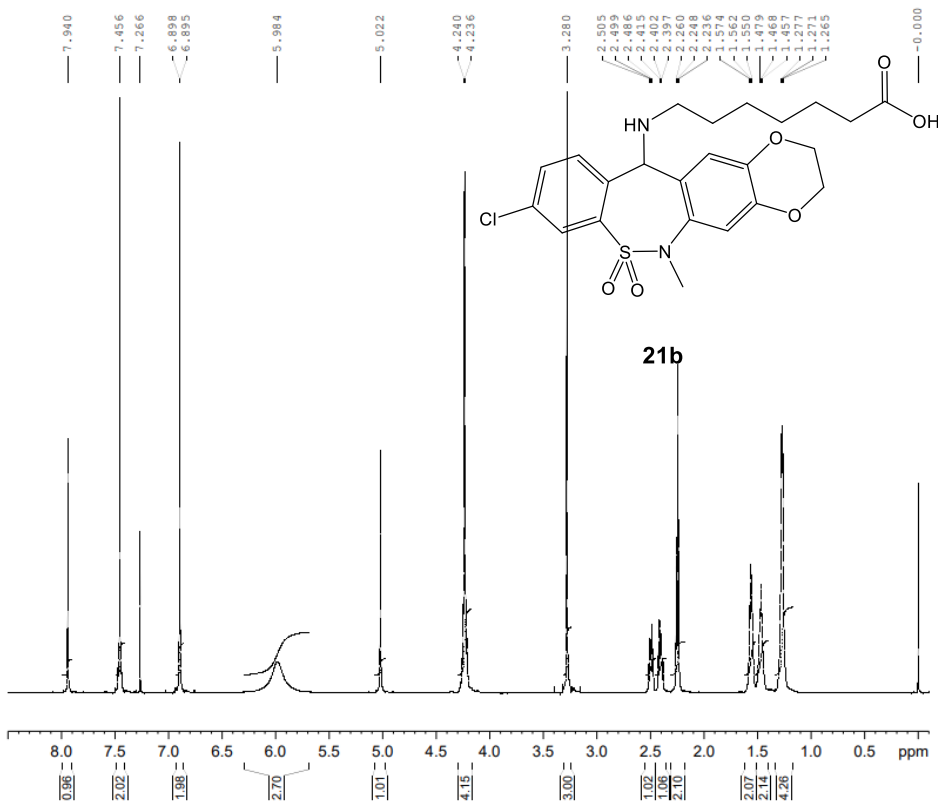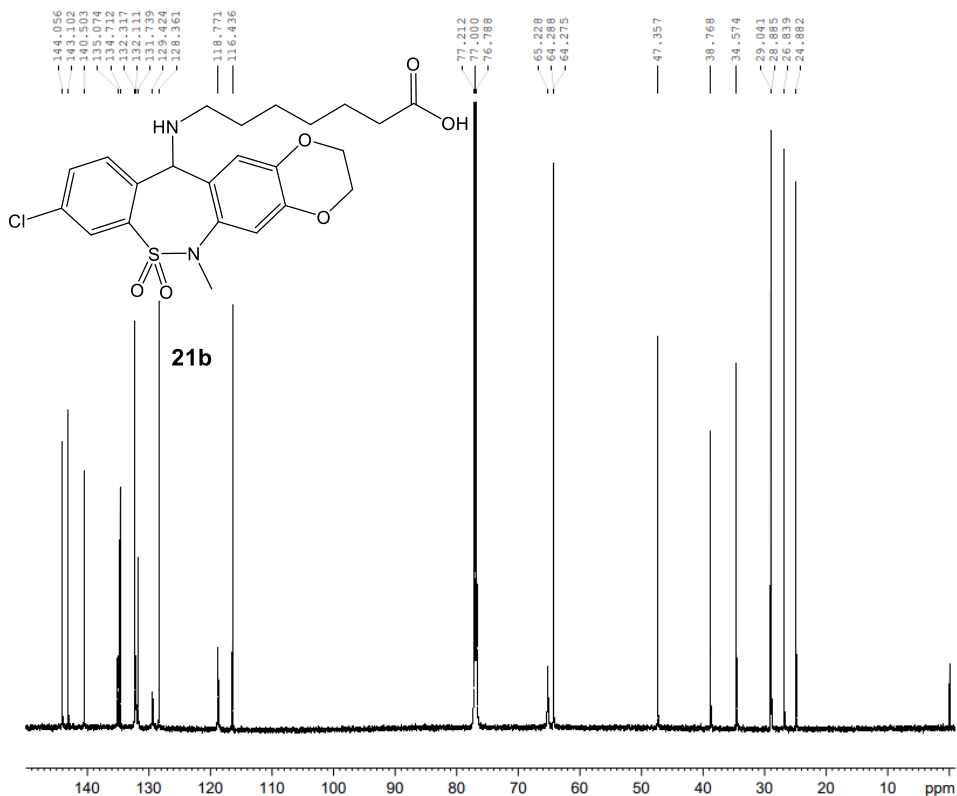

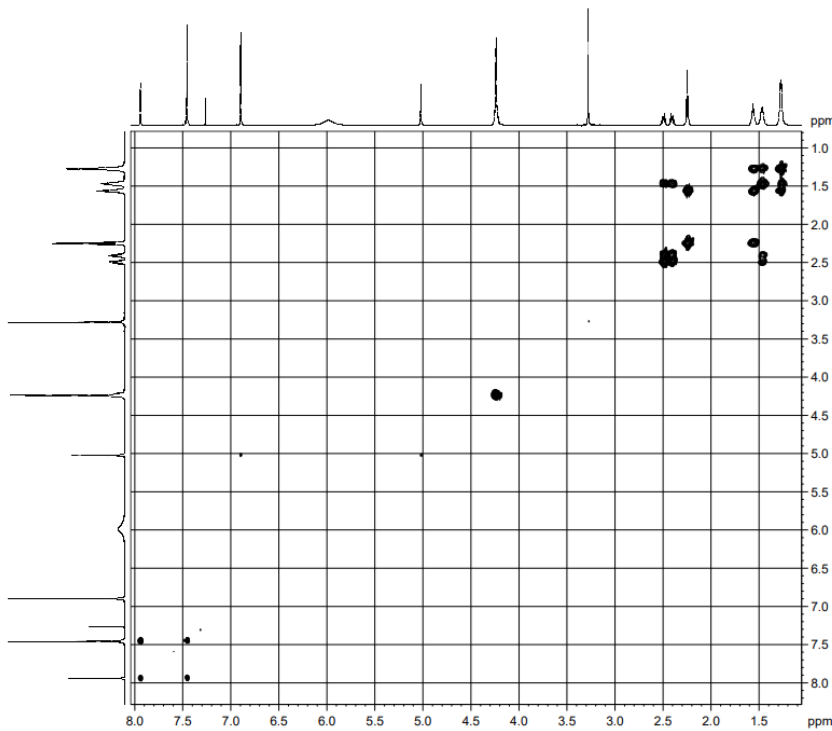

COSY 21b  
 14419  
 bge1778-1974-BGE\_1  
 Berecz Gabor  
 2025.03.21. (KP)

```
Current Data Parameters
NAME 14419
EXPNO 1
PROCNO 1

F2 - Acquisition Parameters
Date_ 20250321
Time_ 16.55 h
INSTRUM spect
PROBHD 1H3QNP101
PULPROG zgpg30
TD 32768
SOLVENT DMS
NS 8
DS 4
SWH 7812.500 Hz
FIDRES 0.0001000 Hz
AQ 0.1110720 sec
RG 198.00
AQ 64.000 usec
DE 23.00 usec
TE 300.2
DQ 0.0000000 sec
DI 2.0000000 sec
D1 0.0000000 sec
D18 0.0000000 sec
TMS1 0.0001310 sec
TMV 600.0000000 MHz
MPC1 11.00 usec
P1 28.0000000 W
SPH1 130.8847133 MHz
SPH1(1) SMO10.100
SPH1(2) SMO10.100
SPH1(3) SMO10.100
SPH1(4) SMO10.100
SPH1(5) SMO10.100
SPH1(6) SMO10.100
P18 1000.00 usec

F1 - Acquisition parameters
TE 300.2
DS 4
SWH 7812.500 Hz
FIDRES 0.0001000 Hz
AQ 0.1110720 sec
RG 198.00
AQ 64.000 usec
DE 23.00 usec
TE 300.2
DQ 0.0000000 sec
DI 2.0000000 sec
D1 0.0000000 sec
D18 0.0000000 sec
TMS1 0.0001310 sec
TMV 600.0000000 MHz
MPC1 11.00 usec
P1 28.0000000 W
SPH1 130.8847133 MHz
SPH1(1) SMO10.100
SPH1(2) SMO10.100
SPH1(3) SMO10.100
SPH1(4) SMO10.100
SPH1(5) SMO10.100
SPH1(6) SMO10.100
P18 1000.00 usec

F2 - Processing parameters
SI 32768
SF 600.0001000 MHz
WDW 0
SSB 0
LB 0 Hz
GB 0
PC 1.60

F1 - Processing parameters
SI 32768
SF 600.0001000 MHz
WDW 0
SSB 0
LB 0 Hz
GB 0
PC 1.60
```

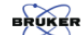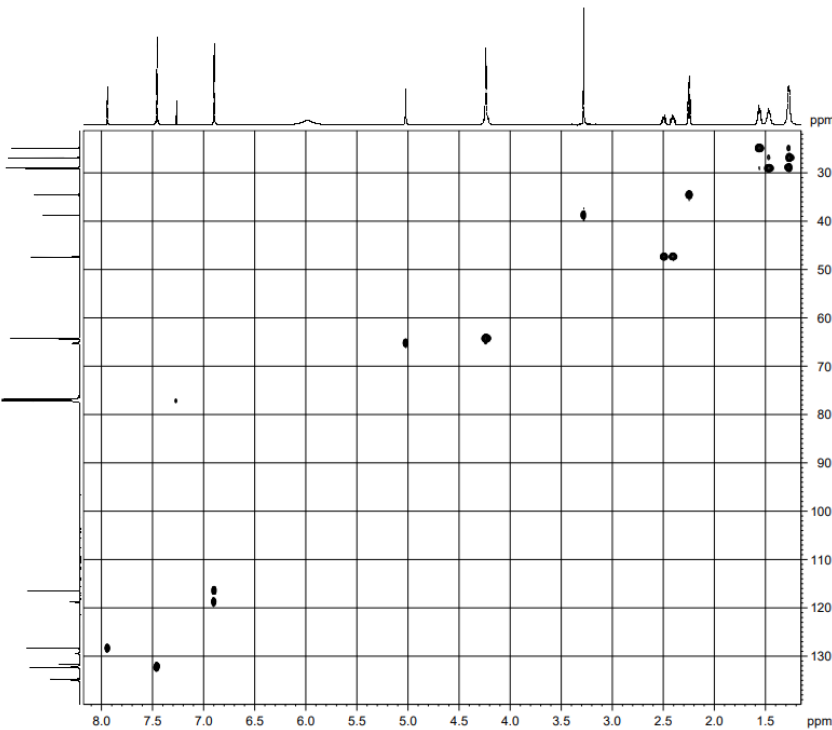

HSQC (140Hz) 21b  
 14419  
 bge1778-1974-BGE\_1  
 Berecz Gabor  
 2025.03.21. (KP)

```
Current Data Parameters
NAME 14419
EXPNO 1
PROCNO 1

F2 - Acquisition Parameters
Date_ 20250321
Time_ 17.12 h
INSTRUM spect
PROBHD 1H3QNP101
PULPROG zgpg30
TD 32768
SOLVENT DMS
NS 8
DS 4
SWH 7812.500 Hz
FIDRES 0.0001000 Hz
AQ 0.1110720 sec
RG 198.00
AQ 64.000 usec
DE 23.00 usec
TE 300.2
DQ 0.0000000 sec
DI 2.0000000 sec
D1 0.0000000 sec
D18 0.0000000 sec
TMS1 0.0001310 sec
TMV 600.0000000 MHz
MPC1 11.00 usec
P1 28.0000000 W
SPH1 130.8847133 MHz
SPH1(1) SMO10.100
SPH1(2) SMO10.100
SPH1(3) SMO10.100
SPH1(4) SMO10.100
SPH1(5) SMO10.100
SPH1(6) SMO10.100
P18 1000.00 usec

F1 - Acquisition parameters
TE 300.2
DS 4
SWH 7812.500 Hz
FIDRES 0.0001000 Hz
AQ 0.1110720 sec
RG 198.00
AQ 64.000 usec
DE 23.00 usec
TE 300.2
DQ 0.0000000 sec
DI 2.0000000 sec
D1 0.0000000 sec
D18 0.0000000 sec
TMS1 0.0001310 sec
TMV 600.0000000 MHz
MPC1 11.00 usec
P1 28.0000000 W
SPH1 130.8847133 MHz
SPH1(1) SMO10.100
SPH1(2) SMO10.100
SPH1(3) SMO10.100
SPH1(4) SMO10.100
SPH1(5) SMO10.100
SPH1(6) SMO10.100
P18 1000.00 usec

F2 - Processing parameters
SI 32768
SF 600.0001000 MHz
WDW 0
SSB 0
LB 0 Hz
GB 0
PC 1.60

F1 - Processing parameters
SI 32768
SF 600.0001000 MHz
WDW 0
SSB 0
LB 0 Hz
GB 0
PC 1.60
```

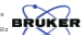

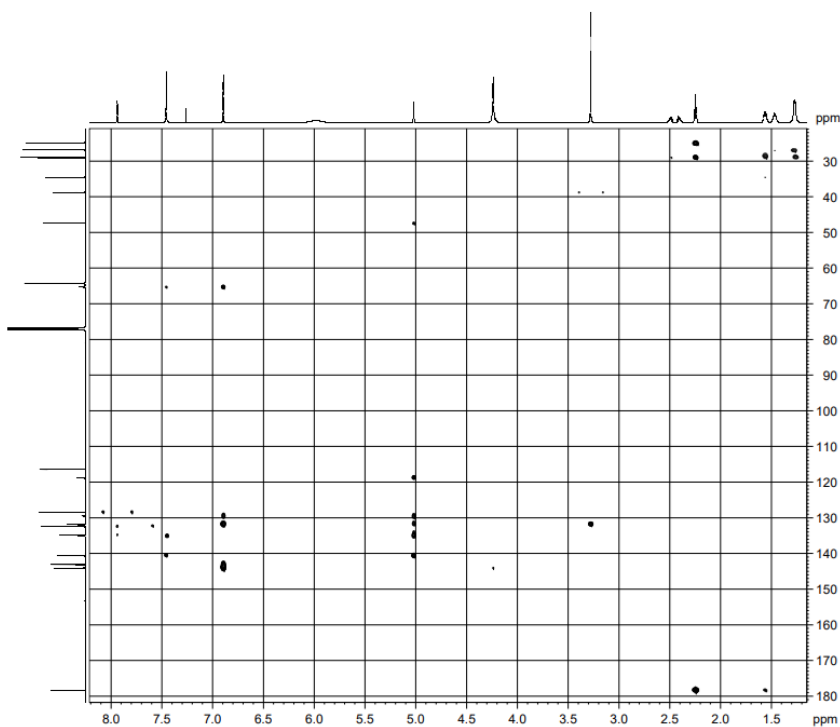

HMBC (8Hz, 140Hz) **21b**  
 144419  
 bge1778-1974-BGE\_1  
 Berecz Gabor  
 2025.03.21. (KP)

```

Current Data Parameters
NAME      144419
EXPNO    1
PROCNO   1

F2 - Acquisition Parameters
Date_     20250220
Time     17.45 h
INSTRUM  spect
PROBHD   5mmQNP1H1
PULPROG  zgpg30
TD        65536
SOLVENT  DMSO-d6
NS        16
DS        4
SWH       7812.000 Hz
FIDRES    7.528390 Hz
AQ        0.111870 sec
RG         188.00
DE        645.000 usec
TE        29.00 usec
TE2       300.2 K
CROSS2    140.000000
CROSS1    0.000000
AQ1       0.000000 sec
AQ2       0.000000 sec
AQ3       1.0000000 sec
AQ4       0.000000 sec
AQ5       0.000000 sec
AQ6       0.000000 sec
AQ7       0.000000 sec
AQ8       0.000000 sec
AQ9       0.000000 sec
AQ10      0.000000 sec
SFO1      600.0037800 MHz
NUC1       13
P1         11.00 usec
PC         0
P2         21.00 usec
P3         28.0000000 sec
P4         150.8867150 MHz
NUC2       1H
P5         9.00 usec
P6         72.69998000 Hz
SFO2       500.1361990 MHz
SFO3       125.7611550 MHz
SFO4       125.7611550 MHz
SFO5       125.7611550 MHz
SFO6       125.7611550 MHz
SFO7       125.7611550 MHz
SFO8       125.7611550 MHz
SFO9       125.7611550 MHz
SFO10     125.7611550 MHz
F1 - Acquisition parameters
TD        65536
SFO1      600.0037800 MHz
SFO2      125.7611550 MHz
SFO3      125.7611550 MHz
SFO4      125.7611550 MHz
SFO5      125.7611550 MHz
SFO6      125.7611550 MHz
SFO7      125.7611550 MHz
SFO8      125.7611550 MHz
SFO9      125.7611550 MHz
SFO10     125.7611550 MHz
P1         11.00 usec
PC         0
P2         21.00 usec
P3         28.0000000 sec
P4         150.8867150 MHz
NUC2       1H
P5         9.00 usec
P6         72.69998000 Hz
SFO2       500.1361990 MHz
SFO3       125.7611550 MHz
SFO4       125.7611550 MHz
SFO5       125.7611550 MHz
SFO6       125.7611550 MHz
SFO7       125.7611550 MHz
SFO8       125.7611550 MHz
SFO9       125.7611550 MHz
SFO10     125.7611550 MHz
F2 - Processing parameters
SI         32768
SF         600.0037800 MHz
WDW        EM
SSB         0
LB          0 Hz
GB          0
PC         1.40
F1 - Processing parameters
SI         32768
SF         600.0037800 MHz
WDW        EM
SSB         0
LB          0 Hz
GB          0
  
```

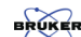

STANDARD PROTON PARAMETERS  
 56004  
 1795-BGE  
 Berecz Gabor  
 2004.12.08. (BT)  
 Pulse Sequence: s2pu1  
 Solvent: CDC13  
 Temp: 25.0 C / 298.1 K  
 INOVA-500 "1500"  
 Relax. delay 3.000 sec  
 Pulse 90.0 degrees  
 Acq. time 5.000 sec  
 Width 8300.0 Hz  
 16 repetitions  
 OBSERVE H1, 499.5244685 MHz  
 DATA PROCESSING  
 FT size 131072  
 Total time 2 min, 8 sec

| INDEX | FREQUENCY | PPM   | HEIGHT |
|-------|-----------|-------|--------|
| 1     | 3970.581  | 7.949 | 22.0   |
| 2     | 3968.384  | 7.944 | 22.4   |
| 3     | 3721.924  | 7.451 | 11.5   |
| 4     | 3719.727  | 7.447 | 10.8   |
| 5     | 3713.745  | 7.435 | 21.4   |
| 6     | 3711.548  | 7.430 | 21.7   |
| 7     | 3694.824  | 7.397 | 27.4   |
| 8     | 3686.523  | 7.380 | 14.8   |
| 9     | 3628.418  | 7.264 | 12.6   |
| 10    | 3458.130  | 6.923 | 0.9    |
| 11    | 3454.712  | 6.916 | 52.3   |
| 12    | 3422.607  | 6.852 | 45.9   |
| 13    | 2364.380  | 4.733 | 27.2   |
| 14    | 2121.582  | 4.247 | 2.0    |
| 15    | 2115.723  | 4.235 | 193.1  |
| 16    | 2109.741  | 4.223 | 2.0    |
| 17    | 2095.703  | 4.195 | 1.0    |
| 18    | 1793.765  | 3.471 | 0.9    |
| 19    | 1664.185  | 3.332 | 185.9  |
| 20    | 1644.287  | 3.292 | 0.9    |
| 21    | 1592.163  | 3.187 | 0.8    |
| 22    | 1171.021  | 2.344 | 156.3  |
| 23    | 1151.001  | 2.304 | 0.8    |
| 24    | 1000.810  | 2.003 | 3.1    |
| 25    | 968.750   | 1.939 | 1.3    |
| 26    | 0.000     | 0.000 | 24.5   |

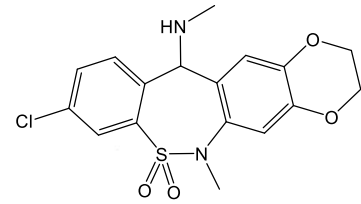

21c

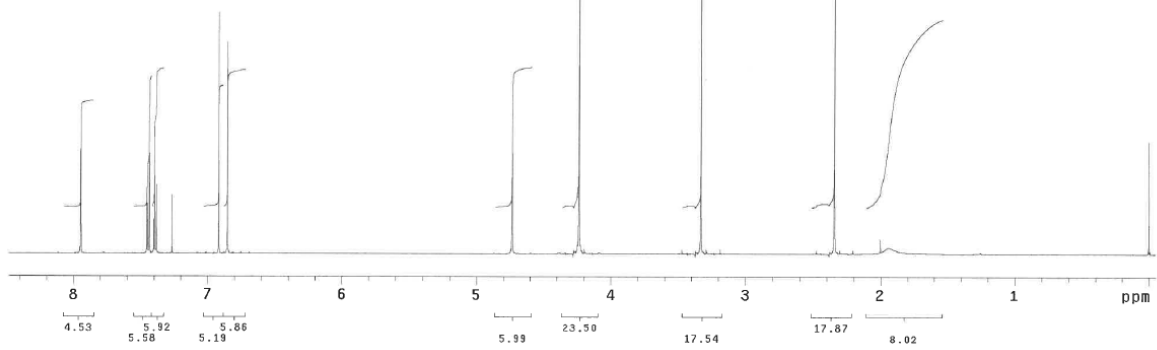

STANDARD CARBON PARAMETERS  
 56004  
 1795-BGE  
 Berecz Gabor  
 2004.12.08. (BT)  
 Pulse Sequence: s2pu1  
 Solvent: CDC13  
 Temp: 25.0 C / 298.1 K  
 User: 1-14-87  
 INOVA-500 "1500"  
 Relax. delay 3.000 sec  
 Pulse 45.0 degrees  
 Acq. time 1.300 sec  
 Width 32000.0 Hz  
 256 repetitions  
 OBSERVE C13, 125.6055311 MHz  
 DECOUPLE H1, 499.5269647 MHz  
 Power 32 dB  
 continuously on  
 WALTZ-16 modulated  
 DATA PROCESSING  
 Line broadening 1.0 Hz  
 FT size 131072  
 Total time 4 hr, 54 min, 11 sec

| INDEX | FREQUENCY | PPM     | HEIGHT |
|-------|-----------|---------|--------|
| 1     | 16050.532 | 143.708 | 54.7   |
| 2     | 17987.798 | 143.288 | 61.2   |
| 3     | 17677.974 | 140.742 | 42.5   |
| 4     | 17168.208 | 136.684 | 46.2   |
| 5     | 16856.684 | 134.203 | 58.2   |
| 6     | 16582.270 | 132.019 | 30.1   |
| 7     | 16573.481 | 131.949 | 138.4  |
| 8     | 16489.497 | 131.280 | 49.4   |
| 9     | 16452.388 | 130.985 | 53.5   |
| 10    | 16134.028 | 128.450 | 127.7  |
| 11    | 14808.833 | 117.900 | 60.0   |
| 12    | 14685.786 | 116.920 | 136.8  |
| 13    | 9703.852  | 77.257  | 268.7  |
| 14    | 9671.626  | 77.000  | 281.6  |
| 15    | 9639.888  | 76.747  | 276.2  |
| 16    | 8453.735  | 67.344  | 31.7   |
| 17    | 8078.364  | 64.315  | 134.6  |
| 18    | 8072.017  | 64.265  | 135.1  |
| 19    | 4867.427  | 38.752  | 81.2   |
| 20    | 4385.005  | 34.911  | 145.8  |

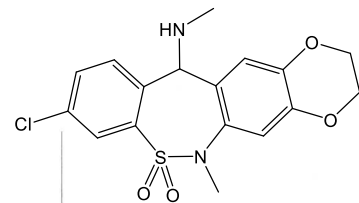

21c

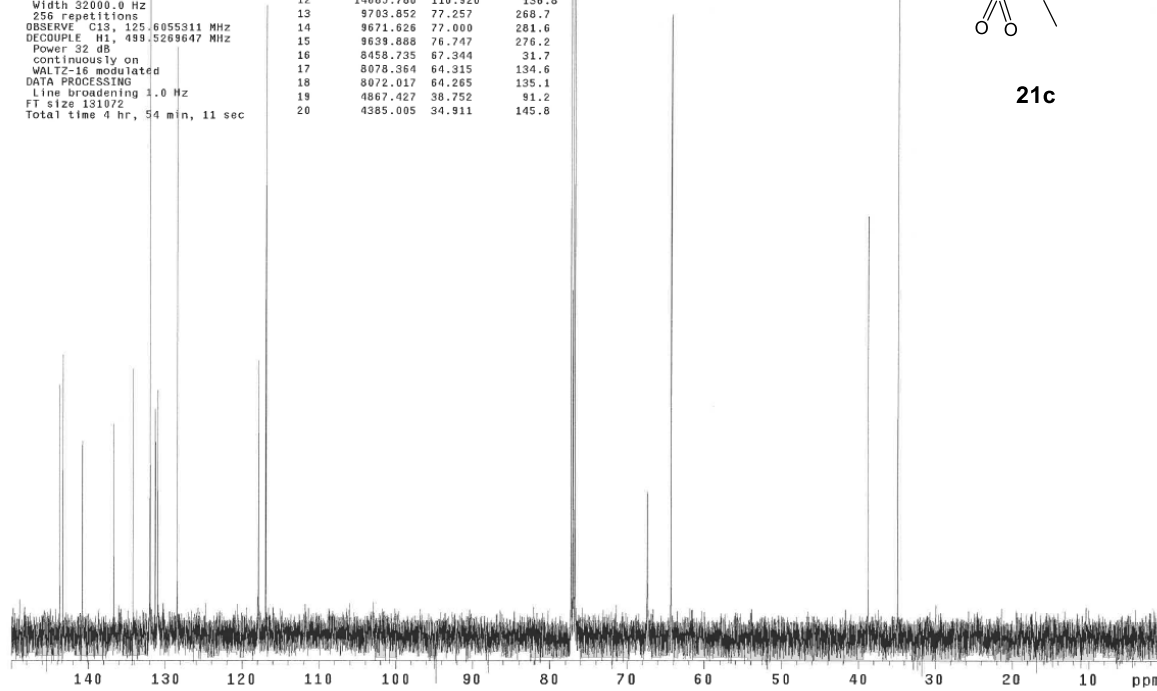

STANDARD 1H  
 60132  
 1904-BGE  
 Berecz Gabor  
 2005/10/19 (SZA)  
 Solvent: CDCl3  
 Temp. 25.0 C / 298.1 K  
 INOVA-500 "1500"  
 PULSE SEQUENCE  
 Relax. delay 3.000 sec  
 Pulse 6.4 usec  
 Acq. time 5.000 sec  
 Width 8000.0 Hz  
 18 repetitions  
 OBSERVE H1, 499.5244649 MHz  
 DATA PROCESSING  
 FT size 131072  
 Total time 2 minutes

| INDEX | FREQUENCY | PPM   | HEIGHT |
|-------|-----------|-------|--------|
| 1     | 3964.966  | 7.937 | 21.1   |
| 2     | 3962.891  | 7.933 | 20.8   |
| 3     | 3714.844  | 7.437 | 8.0    |
| 4     | 3712.789  | 7.433 | 7.1    |
| 5     | 3706.543  | 7.420 | 23.8   |
| 6     | 3704.468  | 7.416 | 24.5   |
| 7     | 3698.486  | 7.404 | 26.0   |
| 8     | 3690.186  | 7.387 | 8.2    |
| 9     | 3631.958  | 7.271 | 10.2   |
| 10    | 3465.942  | 6.938 | 53.3   |
| 11    | 3419.556  | 6.846 | 42.3   |
| 12    | 2423.462  | 4.852 | 14.9   |
| 13    | 2110.474  | 4.225 | 147.1  |
| 14    | 1835.295  | 3.674 | 23.9   |
| 15    | 1830.566  | 3.665 | 32.1   |
| 16    | 1825.928  | 3.655 | 23.6   |
| 17    | 1694.824  | 3.393 | 159.7  |
| 18    | 1294.800  | 2.592 | 10.5   |
| 19    | 1292.969  | 2.588 | 10.9   |
| 20    | 1289.063  | 2.581 | 7.1    |
| 21    | 1286.987  | 2.576 | 7.3    |
| 22    | 1245.239  | 2.493 | 7.6    |
| 23    | 1239.014  | 2.480 | 15.7   |
| 24    | 1232.032  | 2.468 | 15.0   |
| 25    | 1226.807  | 2.456 | 7.7    |
| 26    | 1179.139  | 2.361 | 16.7   |
| 27    | 1174.927  | 2.352 | 22.2   |
| 28    | 1170.654  | 2.344 | 15.9   |
| 29    | 997.681   | 1.997 | 11.4   |
| 30    | 0.000     | 0.000 | 71.2   |

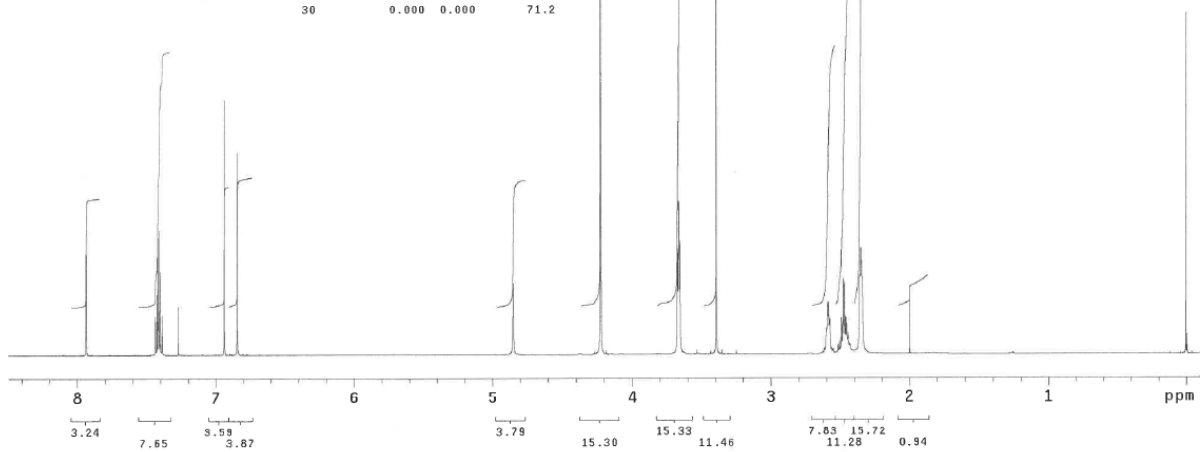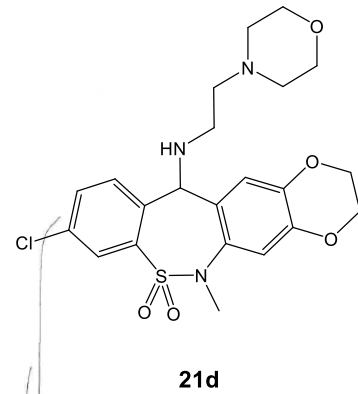

STANDARD 13C  
 60132  
 1904-BGE  
 Berecz Gabor  
 2005/10/19 (SZA)  
 Solvent: CDCl3  
 Temp. 25.0 C / 298.1 K  
 User: 1-14-87  
 INOVA-500 "1500"  
 PULSE SEQUENCE  
 Relax. delay 3.000 sec  
 Pulse 6.0 usec  
 Acq. time 1.300 sec  
 Width 32000.0 Hz  
 672 repetitions  
 OBSERVE C13, 125.6055347 MHz  
 DECOUPLE H1, 499.5269647 MHz  
 Power 32 dB  
 continuously on  
 WALTZ-16 modulated  
 DATA PROCESSING  
 Line broadening 0.5 Hz  
 FT size 131072  
 Total time 48 minutes

| INDEX | FREQUENCY  | PPM     | HEIGHT |
|-------|------------|---------|--------|
| 1     | 16043.953  | 143.645 | 55.8   |
| 2     | 16004.890  | 143.334 | 68.0   |
| 3     | 17705.086  | 140.947 | 37.8   |
| 4     | 17232.430  | 137.184 | 28.6   |
| 5     | 16847.664  | 134.121 | 54.9   |
| 6     | 16714.851  | 133.064 | 18.9   |
| 7     | 16558.113  | 131.816 | 97.9   |
| 8     | 16451.668  | 130.969 | 40.2   |
| 9     | 16397.469  | 130.537 | 18.8   |
| 10    | 16116.219  | 128.298 | 98.5   |
| 11    | 14721.687  | 117.197 | 23.0   |
| 12    | 14691.414  | 116.956 | 90.7   |
| 13    | (11896.492 | 94.706  | 6.2)   |
| 14    | 9704.109   | 77.253  | 136.0  |
| 15    | 9672.371   | 77.000  | 134.9  |
| 16    | 9640.144   | 76.743  | 136.6  |
| 17    | 8397.469   | 66.851  | 180.8  |
| 18    | 8159.676   | 64.958  | 10.1   |
| 19    | 6075.203   | 64.285  | 84.7   |
| 20    | 6064.461   | 64.200  | 84.6   |
| 21    | 7290.047   | 58.035  | 90.5   |
| 22    | 6736.824   | 53.831  | 150.5  |
| 23    | 5548.836   | 44.173  | 82.8   |
| 24    | 4824.715   | 38.409  | 49.9   |
| 25    | (-7.317    | -0.058  | 20.8)  |

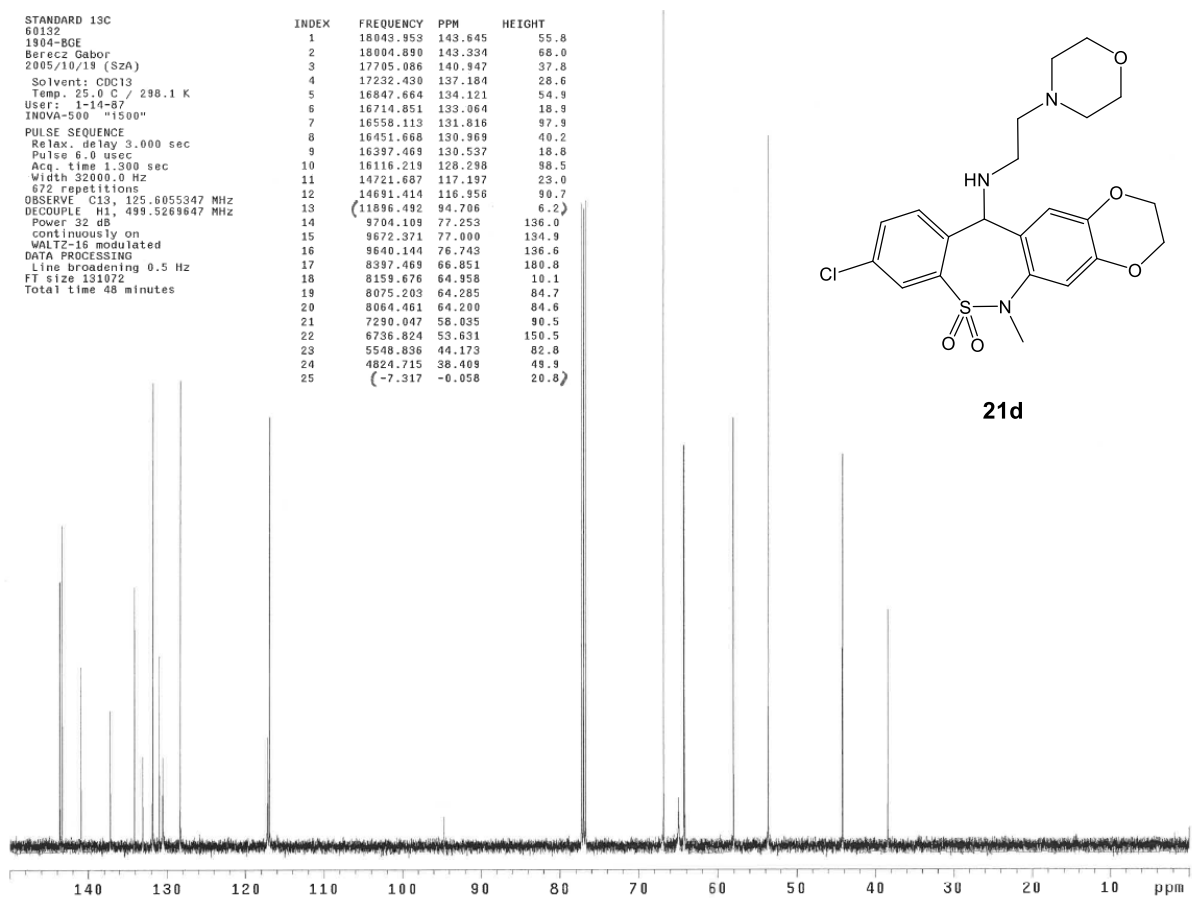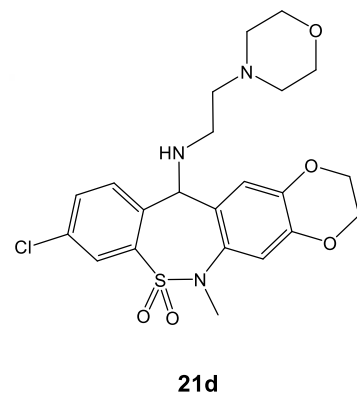

STANDARD 1H  
60177  
1905-BGE  
Berecz Gabor  
2005/10/21 (SZA)  
Solvent: CDCl3  
Temp. 25.0 C / 298.1 K  
INOVA-500 "1500"  
PULSE SEQUENCE  
Relax. delay 3.000 sec  
Pulse 6.4 usec  
Acq. time 5.000 sec  
Width 8000.0 Hz  
18 repetitions  
OBSERVE H1, 499.5244651 MHz  
DATA PROCESSING  
FT size 131072  
Total time 2 minutes

| INDEX | FREQUENCY PPM  | HEIGHT |
|-------|----------------|--------|
| 1     | 3963.501 7.935 | 20.5   |
| 2     | 3962.769 7.933 | 25.6   |
| 3     | 3710.693 7.428 | 66.4   |
| 4     | 3632.080 7.271 | 10.7   |
| 5     | 3459.229 6.925 | 55.0   |
| 6     | 3423.950 6.854 | 47.2   |
| 7     | 2459.106 4.923 | 22.6   |
| 8     | 2111.938 4.228 | 162.0  |
| 9     | 1834.229 3.672 | 28.4   |
| 10    | 1829.590 3.663 | 44.5   |
| 11    | 1825.073 3.654 | 27.7   |
| 12    | 1676.147 3.355 | 159.0  |
| 13    | 1291.748 2.586 | 7.3    |
| 14    | 1288.818 2.580 | 8.7    |
| 15    | 1285.278 2.573 | 14.9   |
| 16    | 1282.349 2.567 | 15.3   |
| 17    | 1278.687 2.560 | 9.0    |
| 18    | 1276.001 2.554 | 8.1    |
| 19    | 1208.252 2.419 | 24.1   |
| 20    | 1203.735 2.410 | 33.6   |
| 21    | 1196.655 2.396 | 42.7   |
| 22    | 1189.697 2.382 | 21.5   |
| 23    | 998.657 1.899  | 5.7    |
| 24    | 852.051 1.706  | 8.6    |
| 25    | 848.389 1.698  | 8.9    |
| 26    | 845.337 1.692  | 12.2   |
| 27    | 841.675 1.685  | 12.2   |
| 28    | 838.623 1.679  | 8.5    |
| 29    | 834.839 1.671  | 8.3    |
| 30    | -0.000 -0.000  | 14.4   |

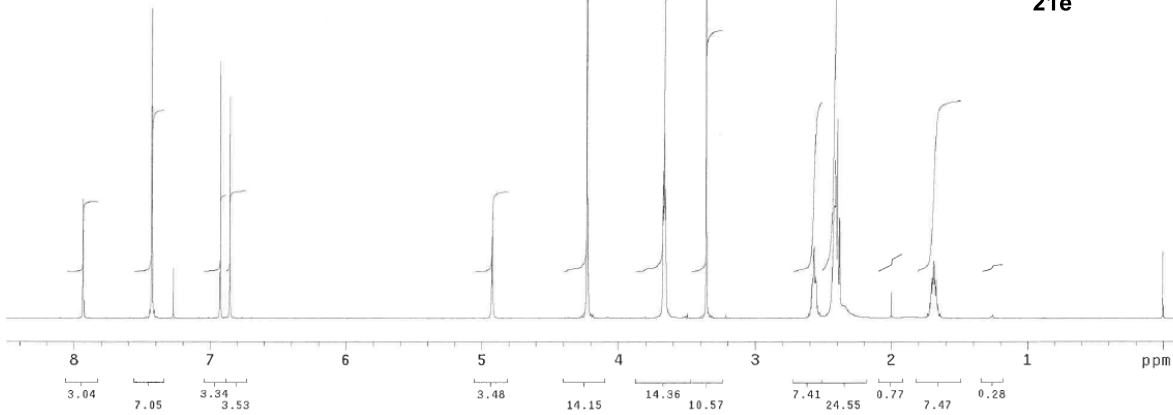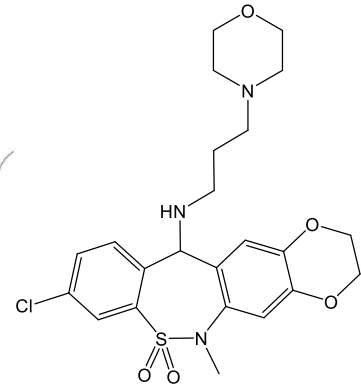

21e

STANDARD 13C  
60177  
1905-BGE  
Berecz Gabor  
2005/10/21 (SZA)  
Solvent: CDCl3  
Temp. 25.0 C / 298.1 K  
User: 1-14-87  
INOVA-500 "1500"  
PULSE SEQUENCE  
Relax. delay 3.000 sec  
Pulse 6.0 usec  
Acq. time 1.300 sec  
Width 32000.0 Hz  
528 repetitions  
OBSERVE C13, 125.8055337 MHz  
DECUPLE H1, 499.5288647 MHz  
Power 32 dB  
continuously on  
WALTZ-16 modulated  
Line broadening 0.5 Hz  
FT size 131072  
Total time 37 minutes

| INDEX | FREQUENCY PPM     | HEIGHT |
|-------|-------------------|--------|
| 1     | 18031.746 143.547 | 42.5   |
| 2     | 18006.844 143.349 | 48.4   |
| 3     | 17671.883 140.683 | 30.6   |
| 4     | 17265.633 137.449 | 20.6   |
| 5     | 16832.527 134.001 | 39.7   |
| 6     | 16722.664 133.126 | 11.5   |
| 7     | 16564.949 131.871 | 67.2   |
| 8     | 16451.179 130.965 | 26.7   |
| 9     | 16334.480 130.036 | 13.7   |
| 10    | 16124.519 128.364 | 71.9   |
| 11    | 14687.996 116.928 | 74.1   |
| 12    | 9704.109 77.253   | 114.3  |
| 13    | 9672.371 77.000   | 121.1  |
| 14    | 9640.144 76.743   | 114.6  |
| 15    | 8401.863 66.886   | 146.8  |
| 16    | 8077.156 64.301   | 69.0   |
| 17    | 8065.437 64.207   | 63.9   |
| 18    | 7198.738 57.308   | 68.1   |
| 19    | 6750.486 52.739   | 140.6  |
| 20    | 5891.609 46.802   | 56.9   |
| 21    | 4822.761 38.393   | 34.1   |
| 22    | 3312.996 26.374   | 66.6   |

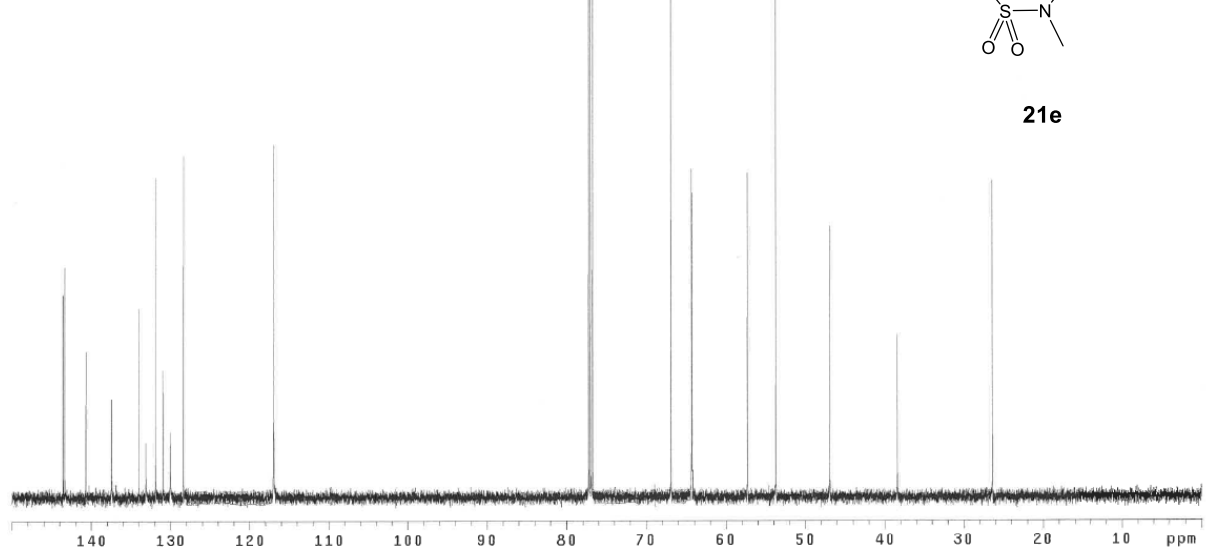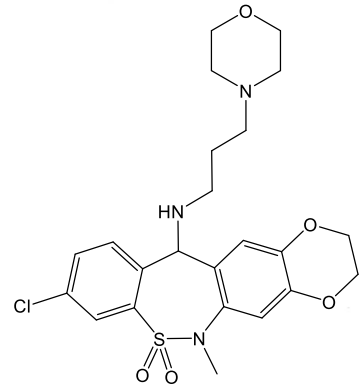

21e



STANDARD 1H  
 63626  
 1962-BGE  
 Berez Gabor  
 2006.05.26. (BT)  
 Solvent: CDCl3  
 Temp. 25.0 C / 298.1 K  
 INOVA-500 "1500"  
 PULSE SEQUENCE  
 Relax. delay 3.000 sec  
 Pulse 6.4 usec  
 Acq. time 5.000 sec  
 Width 8000.0 Hz  
 16 repetitions  
 OBSERVE H1, 499.5244573 MHz  
 DATA PROCESSING  
 FT size 131072  
 Total time 2 minutes

| INDEX | FREQUENCY | PPM   | HEIGHT |
|-------|-----------|-------|--------|
| 1     | 3961.426  | 7.930 | 27.2   |
| 2     | 3959.473  | 7.926 | 29.5   |
| 3     | 3713.257  | 7.434 | 8.9    |
| 4     | 3711.182  | 7.429 | 9.0    |
| 5     | 3704.956  | 7.417 | 24.5   |
| 6     | 3702.881  | 7.413 | 26.8   |
| 7     | 3695.801  | 7.399 | 33.1   |
| 8     | 3687.500  | 7.382 | 11.8   |
| 9     | 3639.404  | 7.266 | 4.7    |
| 10    | 3453.389  | 6.913 | 54.5   |
| 11    | 3415.527  | 6.836 | 49.6   |
| 12    | 2429.077  | 4.863 | 26.0   |
| 13    | 2199.009  | 4.222 | 150.5  |
| 14    | 1842.896  | 3.689 | 40.1   |
| 15    | 1838.379  | 3.680 | 61.8   |
| 16    | 1833.862  | 3.671 | 43.1   |
| 17    | 1669.189  | 3.342 | 151.2  |
| 18    | 1247.681  | 2.498 | 18.2   |
| 19    | 1243.896  | 2.490 | 17.9   |
| 20    | 1194.702  | 2.392 | 39.0   |
| 21    | 1132.100  | 2.306 | 12.7   |
| 22    | 1145.142  | 2.292 | 26.5   |
| 23    | 1138.550  | 2.279 | 13.4   |
| 24    | 966.919   | 1.936 | 3.6    |
| 25    | 752.686   | 1.507 | 35.2   |
| 26    | 749.268   | 1.500 | 48.2   |
| 27    | 0.000     | 0.000 | 5.2    |

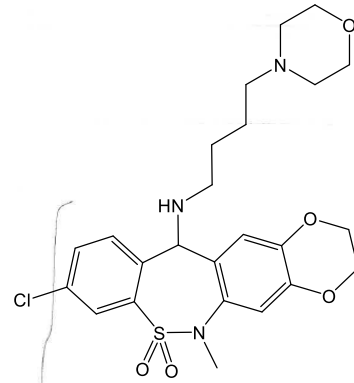

21f

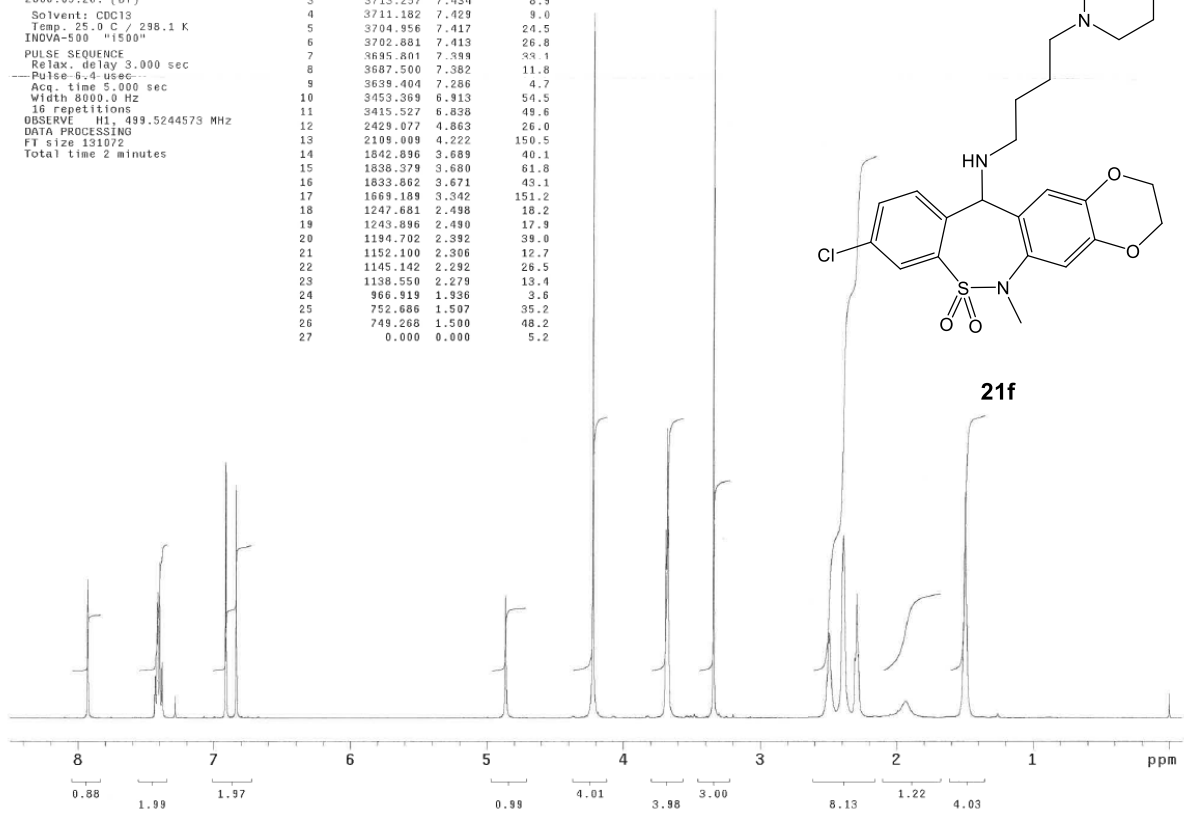

STANDARD 13C  
 63626  
 1962-BGE  
 Berez Gabor  
 2006.05.26. (BT)  
 Solvent: CDCl3  
 Temp. 25.0 C / 298.1 K  
 User: 1-14-87  
 INOVA-500 "1500"  
 PULSE SEQUENCE  
 Relax. delay 3.000 sec  
 Pulse 6.0 usec  
 Acq. time 1.300 sec  
 Width 32000.0 Hz  
 144 repetitions  
 OBSERVE C13, 125.6055406 MHz  
 DECOUPLE H1, 499.5269647 MHz  
 Power 32 dB  
 continuously on  
 WALTZ-16 modulated  
 DATA PROCESSING  
 Line broadening 0.5 Hz  
 FT size 131072  
 Total time 10 minutes

| INDEX | FREQUENCY | PPM     | HEIGHT |
|-------|-----------|---------|--------|
| 1     | 18033.700 | 143.563 | 41.0   |
| 2     | 17989.266 | 143.209 | 42.7   |
| 3     | 17675.789 | 140.714 | 24.2   |
| 4     | 17216.805 | 137.060 | 20.0   |
| 5     | 16830.575 | 133.865 | 42.4   |
| 6     | 16646.004 | 132.516 | 10.8   |
| 7     | 16581.532 | 131.843 | 64.4   |
| 8     | 16460.946 | 131.043 | 25.0   |
| 9     | 16412.117 | 130.654 | 12.8   |
| 10    | 16112.801 | 128.271 | 58.1   |
| 11    | 14759.285 | 117.496 | 16.6   |
| 12    | 14682.137 | 116.882 | 61.5   |
| 13    | 9704.110  | 77.253  | 68.5   |
| 14    | 9672.371  | 77.000  | 71.8   |
| 15    | 9640.145  | 76.743  | 68.8   |
| 16    | 8385.028  | 66.831  | 148.7  |
| 17    | 8182.137  | 65.137  | 6.9    |
| 18    | 8067.391  | 64.223  | 54.1   |
| 19    | 8058.114  | 64.149  | 53.3   |
| 20    | 7367.684  | 58.653  | 86.7   |
| 21    | 6733.895  | 53.607  | 160.7  |
| 22    | 6016.121  | 47.893  | 59.9   |
| 23    | 4851.882  | 38.619  | 37.3   |
| 24    | 3487.078  | 27.840  | 72.1   |
| 25    | 3037.606  | 24.182  | 82.6   |

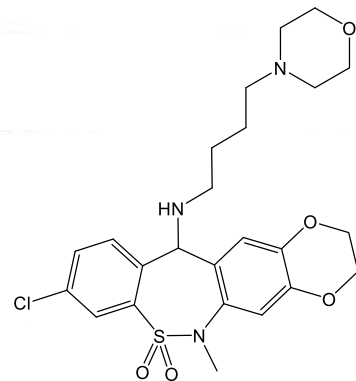

21f

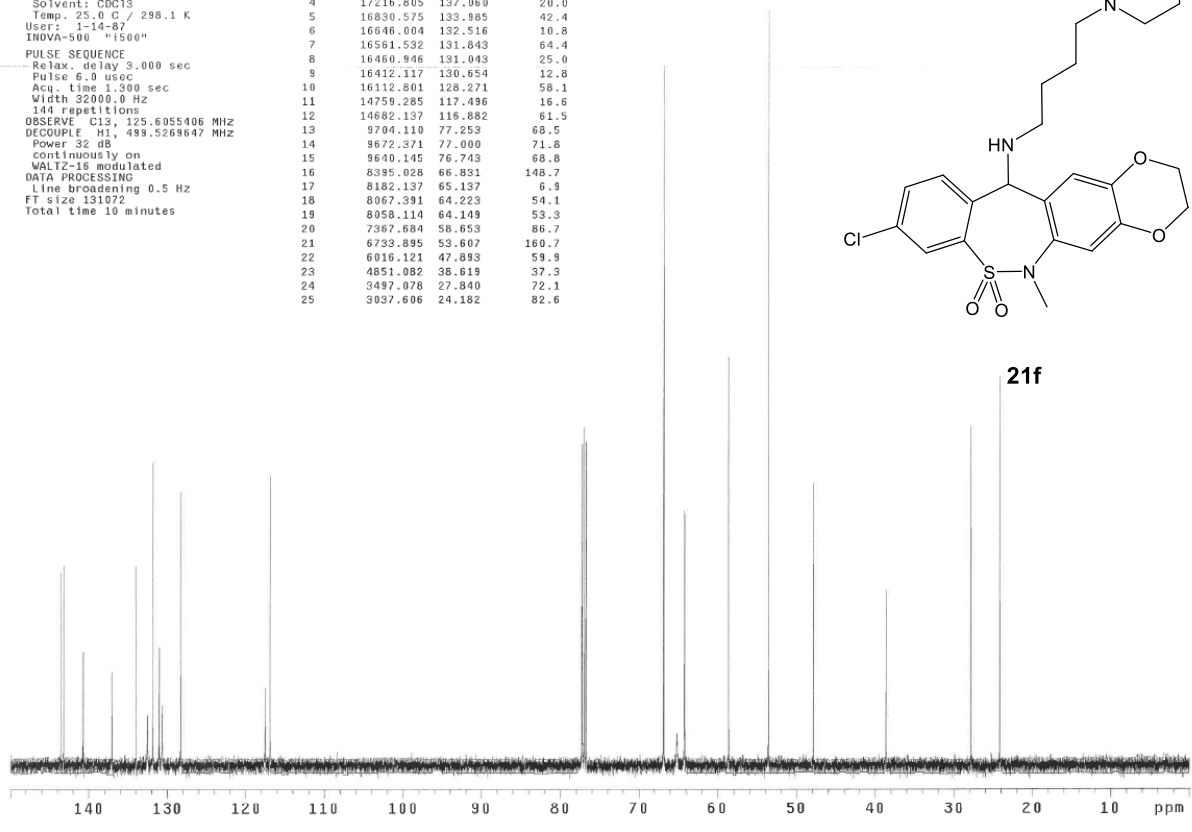

STANDARD PROTON PARAMETERS  
 54081  
 1735-BGE  
 Berecz Gabor  
 2004.06.10. (DA)  
 Pulse Sequence: s2pu1  
 Solvent: CDCl3  
 Temp. 25.0 C / 298.1 K  
 INOVA-500 "1500"  
 Pulse 90.0 degrees  
 Acq. time 5.000 sec  
 Width 8000.0 Hz  
 16 repetitions  
 OBSERVE H1, 499.5244692 MHz  
 DATA PROCESSING  
 FT size 131072  
 Total time 1 min, 20 sec

| INDEX | FREQUENCY | PPM    | HEIGHT |
|-------|-----------|--------|--------|
| 1     | 3963.013  | 7.394  | 44.5   |
| 2     | 3960.937  | 7.329  | 43.5   |
| 3     | 3678.345  | 7.364  | 27.0   |
| 4     | 3676.147  | 7.359  | 25.4   |
| 5     | 3670.044  | 7.347  | 46.3   |
| 6     | 3667.847  | 7.343  | 44.9   |
| 7     | 3646.240  | 7.299  | 71.6   |
| 8     | 3637.939  | 7.283  | 43.6   |
| 9     | 3627.808  | 7.263  | 23.6   |
| 10    | 3480.469  | 6.968  | 104.9  |
| 11    | 3393.799  | 6.794  | 127.5  |
| 12    | 2121.094  | 4.246  | 15.3   |
| 13    | 2115.356  | 4.235  | 95.6   |
| 14    | 2113.037  | 4.230  | 125.8  |
| 15    | 2111.694  | 4.227  | 114.6  |
| 16    | 2109.741  | 4.223  | 86.7   |
| 17    | 2103.516  | 4.211  | 17.0   |
| 18    | 2097.534  | 4.199  | 14.0   |
| 19    | 2011.719  | 4.027  | 57.6   |
| 20    | 1730.835  | 3.465  | 438.7  |
| 21    | 1129.028  | 2.260  | 24.8   |
| 22    | 1126.709  | 2.256  | 24.5   |
| 23    | 1120.117  | 2.242  | 33.4   |
| 24    | 1086.792  | 2.176  | 33.1   |
| 25    | 1080.444  | 2.163  | 24.3   |
| 26    | 1077.881  | 2.158  | 24.1   |
| 27    | 847.412   | 1.696  | 43.6   |
| 28    | 843.750   | 1.689  | 64.5   |
| 29    | 840.942   | 1.683  | 125.3  |
| 30    | 838.135   | 1.678  | 61.9   |
| 31    | 834.595   | 1.671  | 36.5   |
| 32    | -0.000    | -0.000 | 37.3   |

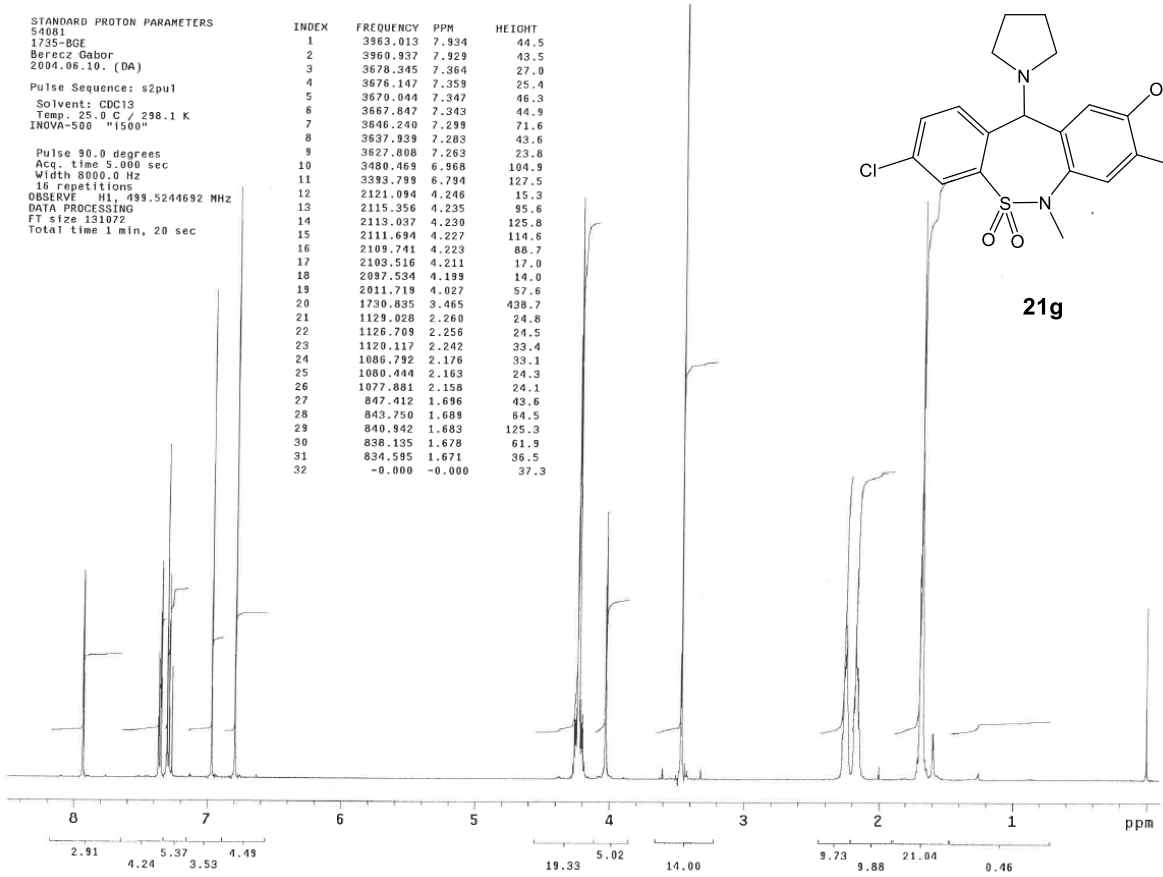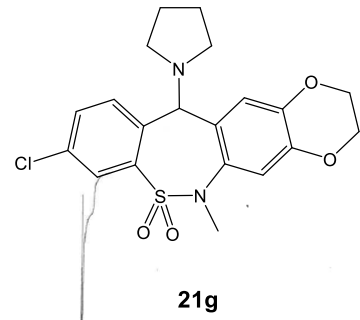

STANDARD 13C PARAMETERS  
 54081  
 1735-BGE  
 Berecz Gabor  
 2004.06.10. (DA)  
 Pulse Sequence: s2pu1  
 Solvent: CDCl3  
 Temp. 25.0 C / 298.1 K  
 User: 1-14-87  
 INOVA-500 "1500"  
 Relax. delay 1.200 sec  
 Pulse 45.0 degrees  
 Acq. time 1.300 sec  
 Width 32000.0 Hz  
 1800 repetitions  
 OBSERVE C13, 125.6055311 MHz  
 DECOUPLE H1, 499.5289647 MHz  
 Power 34 dB  
 continuous on  
 WALTZ-16 modulated  
 DATA PROCESSING  
 Line broadening 0.5 Hz  
 FT size 131072  
 Total time 2 hr, 51 min, 18 sec

| INDEX | FREQUENCY | PPM     | HEIGHT |
|-------|-----------|---------|--------|
| 1     | 18087.622 | 143.844 | 38.6   |
| 2     | 18016.352 | 143.436 | 42.3   |
| 3     | 17972.895 | 143.090 | 9.7    |
| 4     | 17855.415 | 135.786 | 12.0   |
| 5     | 16931.392 | 134.798 | 33.9   |
| 6     | 16911.372 | 134.639 | 33.1   |
| 7     | 16670.649 | 132.722 | 25.4   |
| 8     | 16456.782 | 131.020 | 94.7   |
| 9     | 16409.507 | 130.646 | 33.1   |
| 10    | 16118.403 | 128.326 | 100.8  |
| 11    | 14993.892 | 119.373 | 55.1   |
| 12    | 14854.243 | 118.261 | 50.4   |
| 13    | 9703.852  | 77.257  | 110.9  |
| 14    | 8671.626  | 77.000  | 114.1  |
| 15    | 8639.888  | 76.747  | 114.3  |
| 16    | 8500.727  | 75.839  | 13.3   |
| 17    | 8078.364  | 64.315  | 98.9   |
| 18    | 8059.809  | 64.168  | 98.2   |
| 19    | 6741.938  | 53.675  | 200.0  |
| 20    | 5014.888  | 39.926  | 28.9   |
| 21    | 2912.349  | 23.186  | 190.3  |
| 22    | -4.644    | -0.037  | 6.6    |

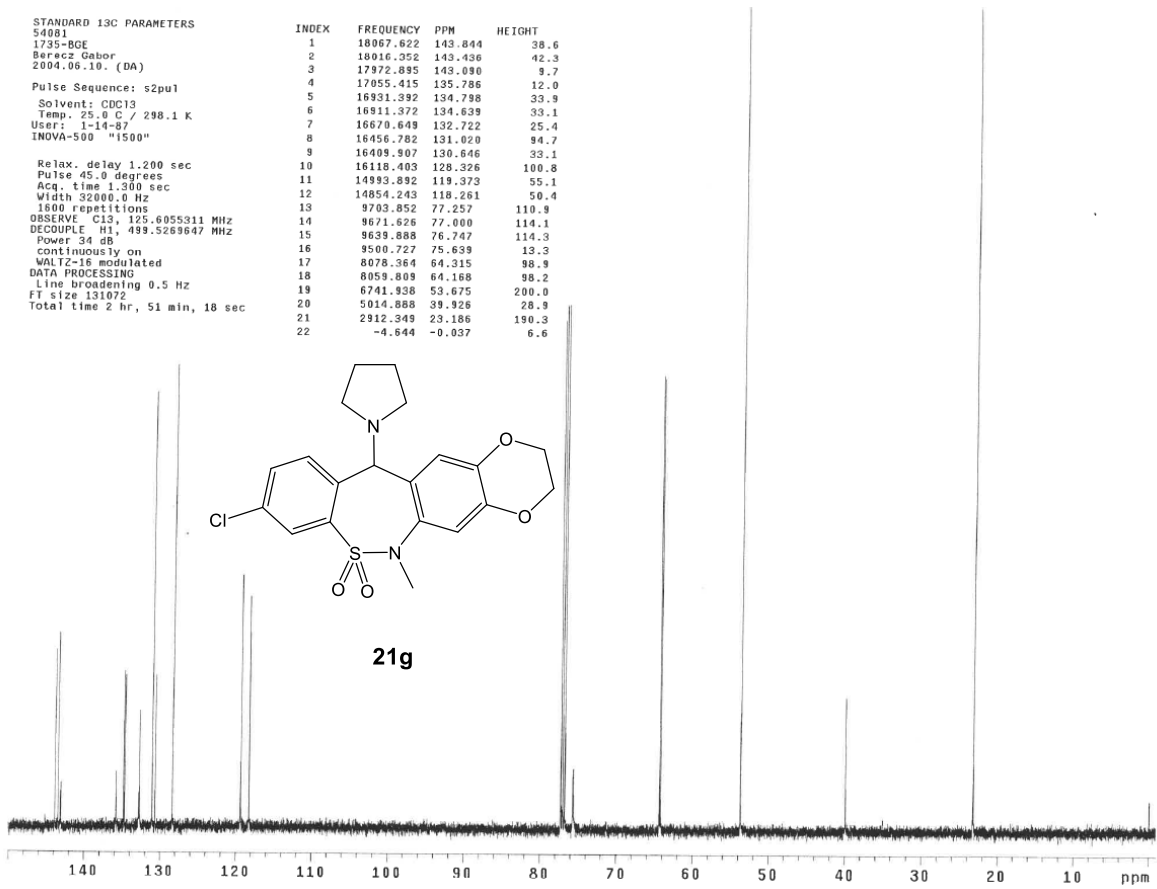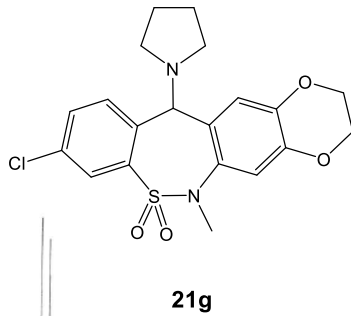

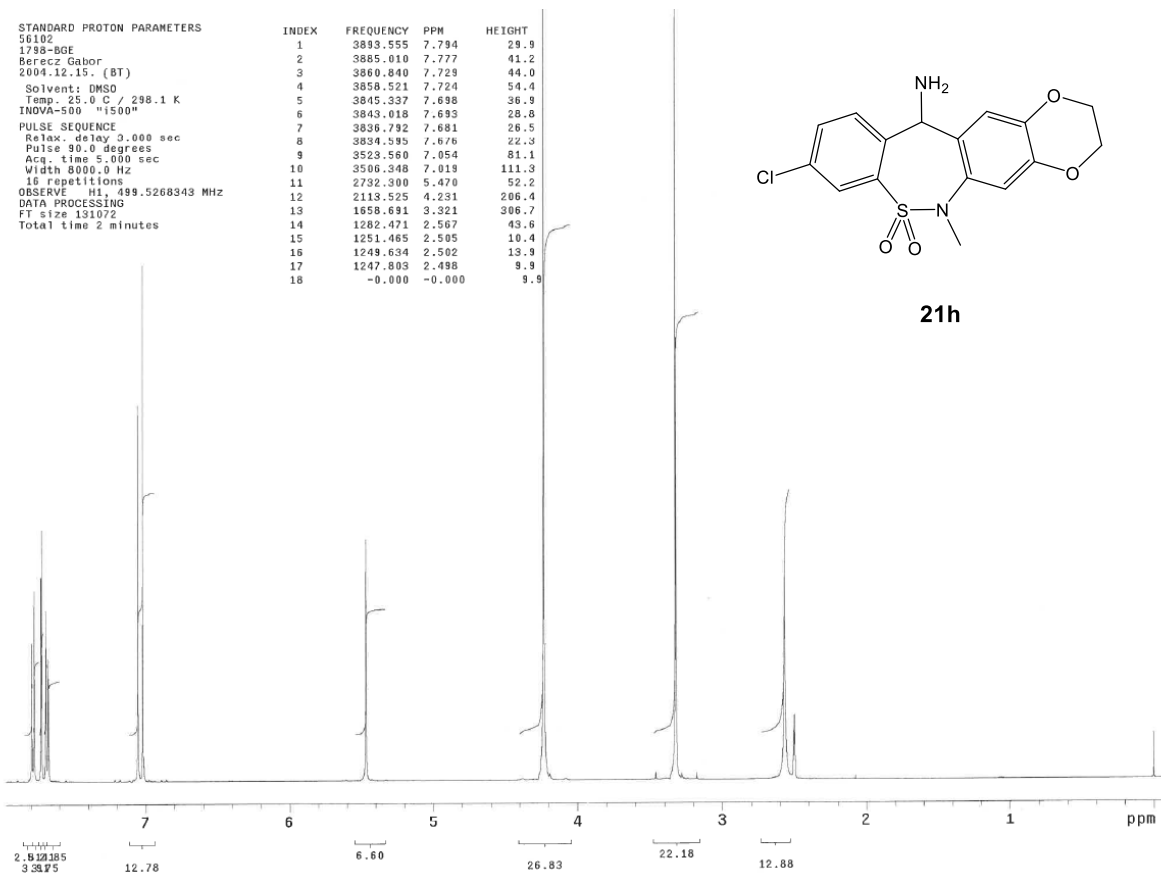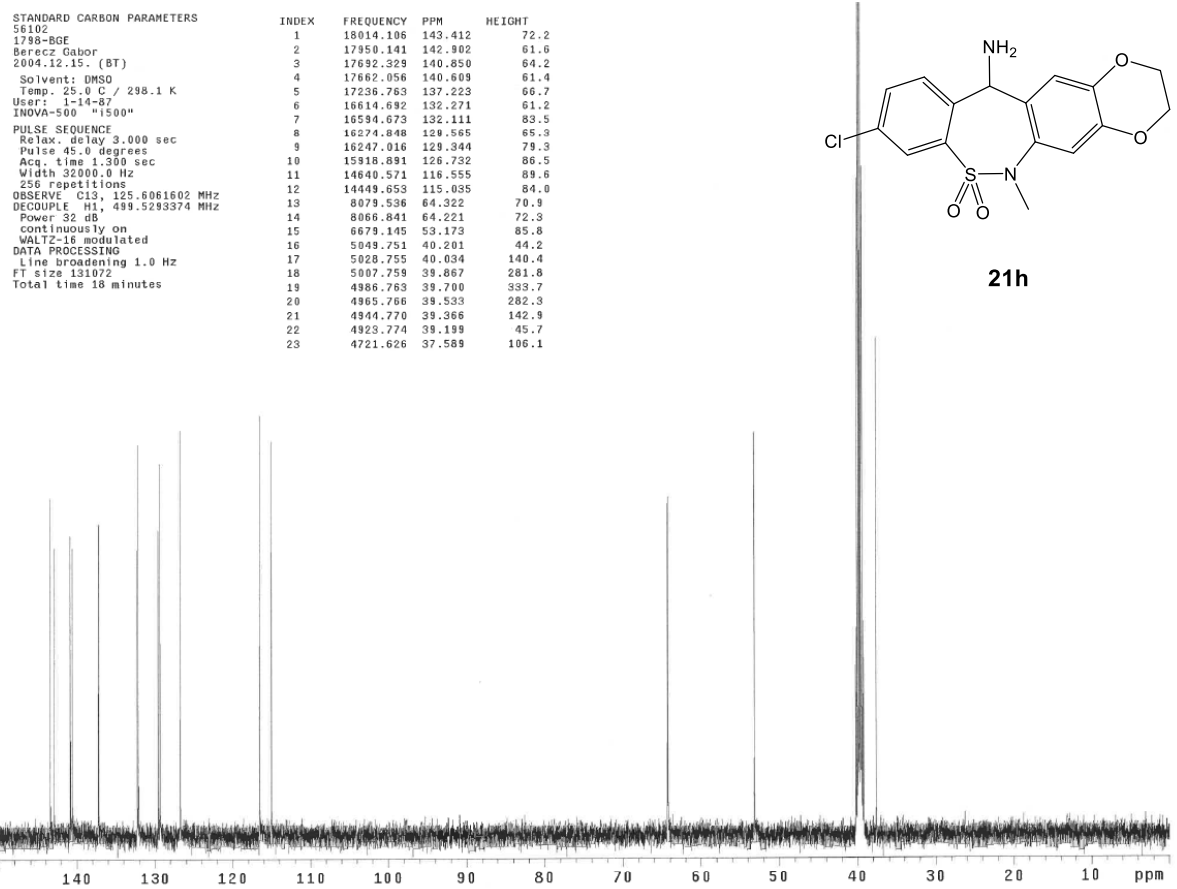

STANDARD 1H  
 75961  
 2264-BGE  
 Berecz Gabor  
 2009\_05\_15\_ (BB)  
 Solvent: CDCl3  
 Temp. 30.0 C / 303.1 K  
 INOVA-500 "1500"  
 PULSE SEQUENCE  
 Relax. delay 1.000 sec  
 Pulse 90.0 degrees  
 Acq. time 5.000 sec  
 Width 11899.4 Hz  
 16 repetitions  
 OBSERVE H1, 499.5244598 MHz  
 DATA PROCESSING  
 FT size 131072  
 Total time 1 minutes

| INDEX | FREQUENCY PPM | HEIGHT |
|-------|---------------|--------|
| 1     | 3958.908      | 7.925  |
| 2     | 3958.894      | 7.921  |
| 3     | 3714.475      | 7.436  |
| 4     | 3712.461      | 7.432  |
| 5     | 3706.236      | 7.420  |
| 6     | 3705.137      | 7.417  |
| 7     | 3704.222      | 7.415  |
| 8     | 3697.630      | 7.402  |
| 9     | 3689.208      | 7.395  |
| 10    | 3636.653      | 7.280  |
| 11    | 3453.013      | 6.913  |
| 12    | 3412.732      | 6.832  |
| 13    | 2422.314      | 4.850  |
| 14    | 2111.100      | 4.226  |
| 15    | 2104.692      | 4.213  |
| 16    | 1673.134      | 3.348  |
| 17    | 1490.587      | 2.984  |
| 18    | 1461.658      | 2.926  |
| 19    | 1240.661      | 2.484  |
| 20    | 1239.379      | 2.481  |
| 21    | 1232.971      | 2.468  |
| 22    | 1226.379      | 2.455  |
| 23    | 1145.817      | 2.294  |
| 24    | 1138.493      | 2.279  |
| 25    | 1130.803      | 2.264  |
| 26    | 995.861       | 1.994  |
| 27    | 931.960       | 1.866  |
| 28    | 808.320       | 1.613  |
| 29    | 801.596       | 1.605  |
| 30    | 794.272       | 1.590  |
| 31    | 748.498       | 1.498  |
| 32    | 741.906       | 1.485  |
| 33    | 734.909       | 1.471  |
| 34    | 660.428       | 1.322  |
| 35    | 656.766       | 1.315  |
| 36    | 653.105       | 1.307  |
| 37    | -0.000        | -0.000 |

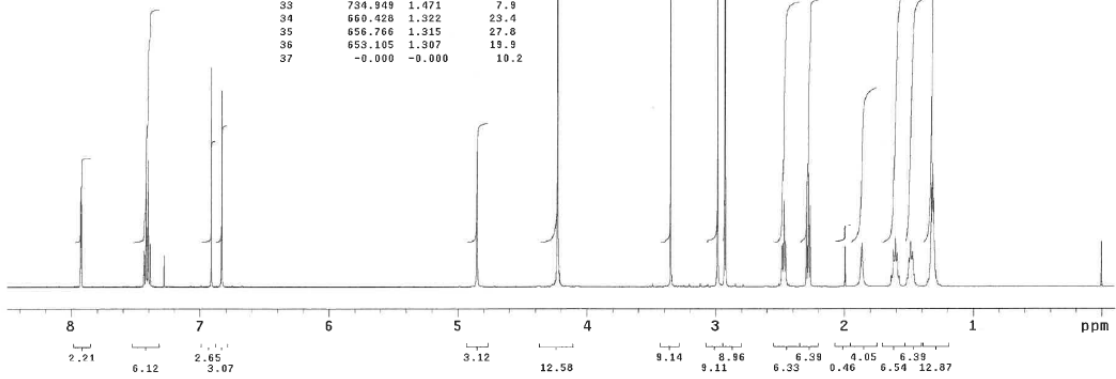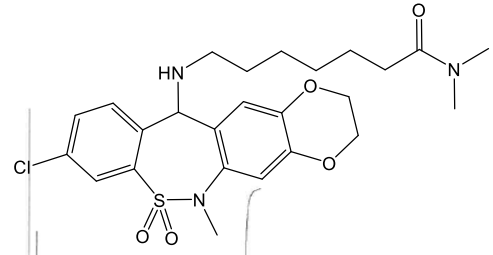

21i

STANDARD 13C  
 75961  
 2264-BGE  
 Berecz Gabor  
 2009\_05\_15\_ (BB)  
 Solvent: CDCl3  
 Temp. 30.0 C / 303.1 K  
 User: 1-14-07  
 INOVA-500 "1500"  
 PULSE SEQUENCE  
 Relax. delay 3.000 sec  
 Pulse 90.0 degrees  
 Acq. time 1.300 sec  
 Width 32000.0 Hz  
 352 repetitions  
 OBSERVE C13, 125.6055352 MHz  
 DECOUPLE H1, 499.5269647 MHz  
 Power 34 db  
 continuously on  
 WALTZ-16 modulated  
 DATA PROCESSING  
 Line broadening 0.5 Hz  
 FT size 131072  
 Total time 25 minutes

| INDEX | FREQUENCY PPM | HEIGHT  |
|-------|---------------|---------|
| 1     | 21721.687     | 172.922 |
| 2     | 18037.695     | 143.594 |
| 3     | 17997.978     | 143.271 |
| 4     | 17693.367     | 140.854 |
| 5     | 17234.383     | 137.200 |
| 6     | 16833.504     | 134.008 |
| 7     | 16677.254     | 132.765 |
| 8     | 16564.461     | 131.867 |
| 9     | 16465.340     | 131.078 |
| 10    | 16418.853     | 130.708 |
| 11    | 16112.801     | 128.271 |
| 12    | 14760.750     | 117.508 |
| 13    | 14693.855     | 116.975 |
| 14    | 9704.103      | 77.253  |
| 15    | 9572.371      | 77.000  |
| 16    | 9640.144      | 76.743  |
| 17    | 8196.297      | 65.249  |
| 18    | 8072.273      | 64.262  |
| 19    | 8063.484      | 64.192  |
| 20    | 8036.629      | 48.957  |
| 21    | 4852.058      | 38.628  |
| 22    | 4667.976      | 37.161  |
| 23    | 4427.254      | 35.245  |
| 24    | 4162.117      | 33.194  |
| 25    | 3749.031      | 29.845  |
| 26    | 3671.394      | 29.227  |
| 27    | 3396.492      | 27.039  |
| 28    | 3192.332      | 24.936  |

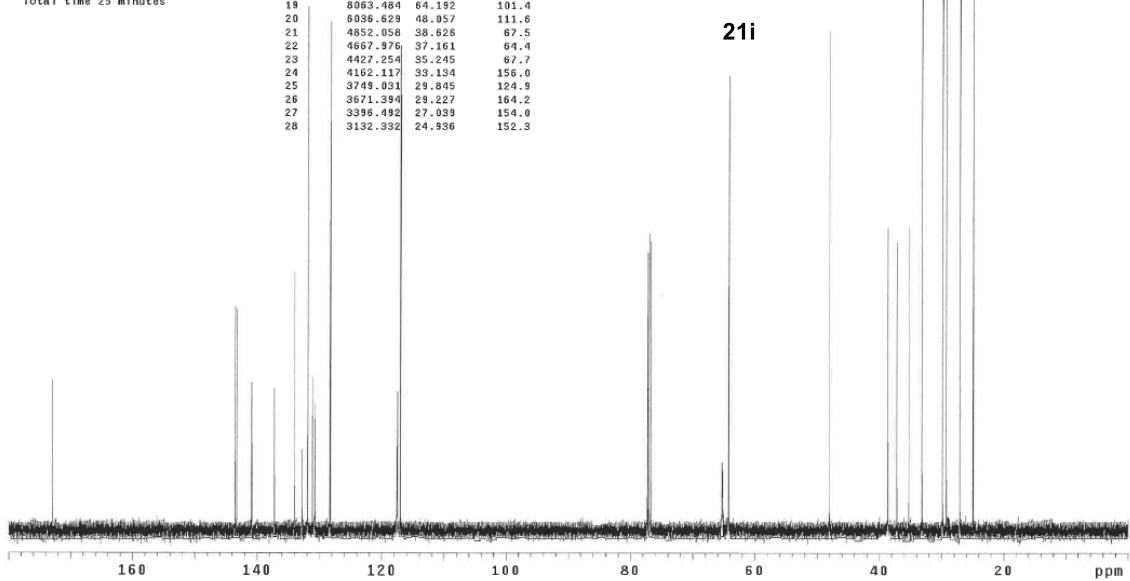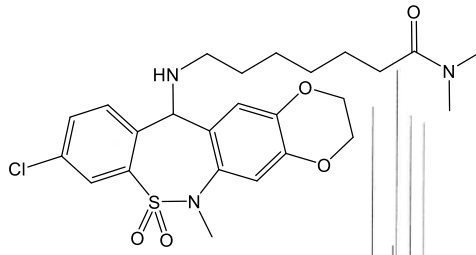

21i

| STANDARD 1H                 | INDEX | FREQUENCY | PPM    | HEIGHT |
|-----------------------------|-------|-----------|--------|--------|
| 62641                       | 1     | 3958.618  | 7.925  | 20.8   |
| 1946-BGE                    | 2     | 3702.148  | 7.411  | 53.5   |
| Berecz Gabor                | 3     | 3701.172  | 7.409  | 48.4   |
| 2006.03.22. (CzB)           | 4     | 3632.324  | 7.272  | 4.1    |
| Solvent: CDCl3              | 5     | 3465.942  | 6.938  | 39.4   |
| Temp. 25.0 C / 298.1 K      | 6     | 3419.556  | 6.846  | 38.6   |
| INVA-500 "1500"             | 7     | 2425.903  | 4.856  | 16.1   |
| PULSE SEQUENCE              | 8     | 2107.500  | 4.219  | 130.3  |
| Relax. delay 1.000 sec      | 9     | 1688.364  | 3.400  | 122.4  |
| Pulse 6.4 usec              | 10    | 1304.321  | 2.811  | 6.4    |
| Acq. time 5.000 sec         | 11    | 1298.828  | 2.600  | 16.6   |
| Width 8000.0 Hz             | 12    | 1296.387  | 2.595  | 21.5   |
| 16 repetitions              | 13    | 1292.480  | 2.587  | 18.6   |
| OBSERVE H1, 499.5244647 MHz | 14    | 1290.405  | 2.583  | 23.4   |
| DATA PROCESSING             | 15    | 1289.987  | 2.576  | 19.3   |
| FT size 131072              | 16    | 1281.616  | 2.566  | 6.7    |
| Total time 1 minutes        | 17    | 1278.076  | 2.558  | 3.2    |
|                             | 18    | 1210.205  | 2.423  | 15.1   |
|                             | 19    | 1203.857  | 2.410  | 34.5   |
|                             | 20    | 995.605   | 1.993  | 4.4    |
|                             | 21    | 866.333   | 1.734  | 16.5   |
|                             | 22    | 861.938   | 1.726  | 37.8   |
|                             | 23    | -0.000    | -0.000 | 3.8    |

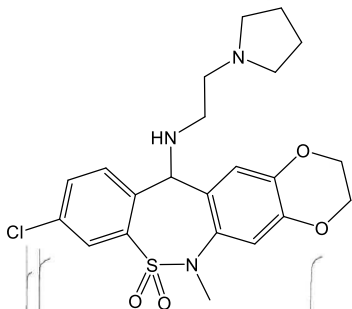

21j

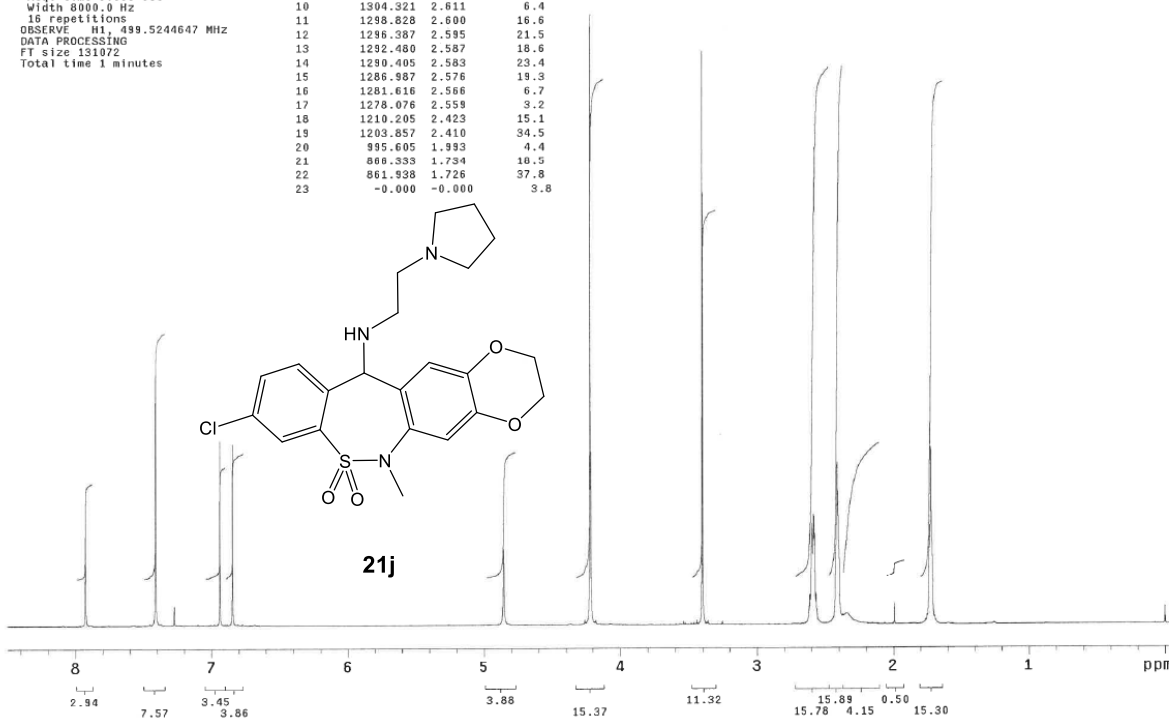

| STANDARD 13C                 | INDEX | FREQUENCY | PPM     | HEIGHT |
|------------------------------|-------|-----------|---------|--------|
| 62641                        | 1     | 18037.117 | 143.590 | 35.5   |
| 1946-BGE                     | 2     | 18001.961 | 143.310 | 38.0   |
| Berecz Gabor                 | 3     | 17729.012 | 141.137 | 20.6   |
| 2006.03.22. (CzB)            | 4     | 17245.613 | 137.289 | 17.6   |
| Solvent: CDCl3               | 5     | 16837.898 | 134.043 | 36.3   |
| Temp. 25.0 C / 298.1 K       | 6     | 16747.566 | 133.324 | 11.7   |
| User: 1-14-87                | 7     | 16555.672 | 131.797 | 59.0   |
| INVA-500 "1500"              | 8     | 16441.902 | 130.891 | 22.3   |
| PULSE SEQUENCE               | 9     | 16416.023 | 130.685 | 12.3   |
| Relax. delay 3.000 sec       | 10    | 16096.199 | 128.139 | 60.2   |
| Pulse 6.0 usec               | 11    | 14735.848 | 117.309 | 15.7   |
| Acq. time 1.300 sec          | 12    | 14700.203 | 117.026 | 58.0   |
| Width 32000.0 Hz             | 13    | 9704.598  | 77.257  | 65.0   |
| 720 repetitions              | 14    | 9672.371  | 77.000  | 66.3   |
| OBSERVE C13, 125.6055357 MHz | 15    | 9640.633  | 76.747  | 65.3   |
| DECOUPLE H1, 499.5269647 MHz | 16    | 8180.184  | 65.121  | 6.6    |
| Power 32 dB                  | 17    | 8072.762  | 64.266  | 55.7   |
| continuously on              | 18    | 8062.508  | 64.184  | 52.0   |
| WALTZ-16 modulated           | 19    | 6979.500  | 55.563  | 59.8   |
| DATA PROCESSING              | 20    | 6792.976  | 54.078  | 144.3  |
| Line broadening 0.5 Hz       | 21    | 5099.657  | 40.727  | 57.0   |
| FT size 131072               | 22    | 4813.464  | 38.319  | 31.7   |
| Total time 51 minutes        | 23    | 2937.996  | 23.388  | 143.5  |

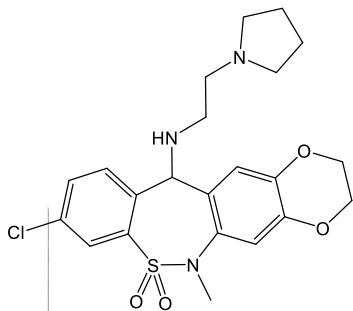

21j

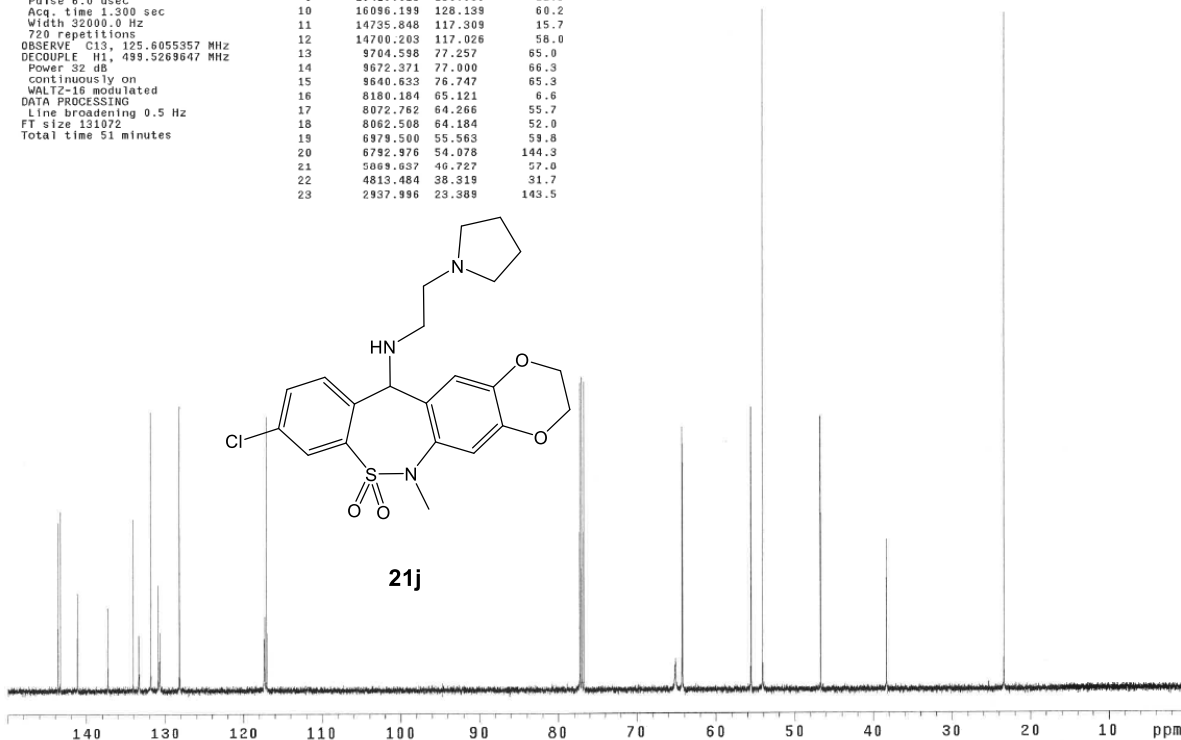

STANDARD 1H  
 62615  
 1945-BGE  
 Berecz Gabor  
 2006.03.21. (BT)  
 Solvent: CDCl3  
 Temp. 25.0 C / 298.1 K  
 INOVA-500 "1500"  
 PULSE SEQUENCE  
 Relax. delay 3.000 sec  
 Pulse 6.4 uscc  
 Acq. time 5.000 sec  
 Width 8000.0 Hz  
 16 repetitions  
 OBSERVE H1, 499.5244668 MHz  
 DATA PROCESSING  
 FT size 131072  
 Total time 2 minutes

| INDEX | FREQUENCY | PPM    | HEIGHT |
|-------|-----------|--------|--------|
| 1     | 3962.158  | 7.932  | 19.6   |
| 2     | 3960.937  | 7.929  | 25.3   |
| 3     | 3702.637  | 7.412  | 46.3   |
| 4     | 3701.234  | 7.410  | 66.9   |
| 5     | 3630.737  | 7.268  | 8.1    |
| 6     | 3467.896  | 6.942  | 60.8   |
| 7     | 3416.504  | 6.840  | 52.7   |
| 8     | 2428.223  | 4.861  | 8.0    |
| 9     | 2424.438  | 4.853  | 8.1    |
| 10    | 2108.032  | 4.220  | 177.2  |
| 11    | 1705.811  | 3.415  | 177.7  |
| 12    | 1290.527  | 2.584  | 12.1   |
| 13    | 1285.522  | 2.573  | 13.5   |
| 14    | 1211.914  | 2.426  | 22.1   |
| 15    | 1205.811  | 2.414  | 33.9   |
| 16    | 1199.829  | 2.402  | 15.4   |
| 17    | 1185.913  | 2.374  | 5.1    |
| 18    | 1180.420  | 2.363  | 4.9    |
| 19    | 1141.602  | 2.285  | 16.8   |
| 20    | 996.338   | 1.995  | 3.6    |
| 21    | 772.339   | 1.546  | 7.4    |
| 22    | 766.602   | 1.535  | 21.5   |
| 23    | 760.386   | 1.523  | 32.5   |
| 24    | 755.493   | 1.512  | 26.3   |
| 25    | 750.000   | 1.501  | 9.4    |
| 26    | 704.956   | 1.411  | 9.0    |
| 27    | 700.073   | 1.401  | 9.8    |
| 28    | -0.000    | -0.000 | 9.0    |

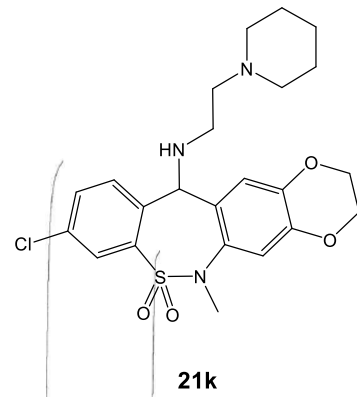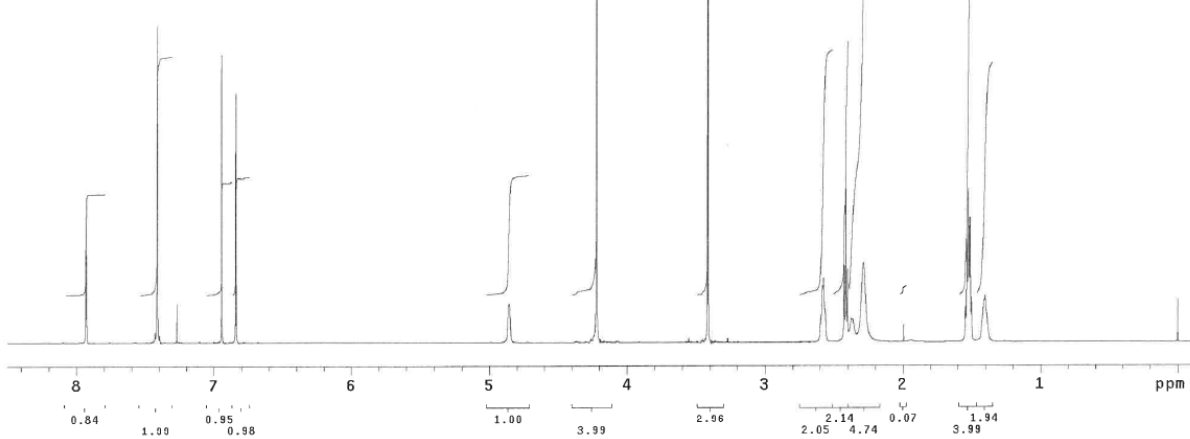

STANDARD 13C  
 62615  
 1945-BGE  
 Berecz Gabor  
 2006.03.21. (BT)  
 Solvent: CDCl3  
 Temp. 25.0 C / 298.1 K  
 User: 1-14-87  
 INOVA-500 "1500"  
 PULSE SEQUENCE  
 Relax. delay 3.000 sec  
 Pulse 6.0 uscc  
 Acq. time 1.300 sec  
 Width 32000.0 Hz  
 256 repetitions  
 OBSERVE C13, 125.6055342 MHz  
 DECOUPLE H1, 499.5269647 MHz  
 Power 32 dB  
 continuously on  
 WALTZ-16 modulated  
 DATA PROCESSING  
 Line broadening 0.5 Hz  
 FT size 131072  
 Total time 18 minutes

| INDEX | FREQUENCY | PPM     | HEIGHT |
|-------|-----------|---------|--------|
| 1     | 18036.140 | 143.582 | 51.7   |
| 2     | 18008.797 | 143.365 | 50.9   |
| 3     | 17729.012 | 141.137 | 27.0   |
| 4     | 17257.332 | 137.383 | 22.6   |
| 5     | 16936.922 | 134.036 | 47.1   |
| 6     | 16774.422 | 133.538 | 14.1   |
| 7     | 16550.789 | 131.758 | 71.5   |
| 8     | 16440.437 | 130.879 | 29.2   |
| 9     | 16390.633 | 130.483 | 16.1   |
| 10    | 16103.523 | 128.197 | 77.6   |
| 11    | 14713.387 | 117.131 | 20.4   |
| 12    | 14707.039 | 117.080 | 76.1   |
| 13    | 9704.597  | 77.257  | 91.1   |
| 14    | 9672.371  | 77.000  | 93.5   |
| 15    | 9640.633  | 76.747  | 92.7   |
| 16    | 8145.515  | 64.845  | 7.9    |
| 17    | 8074.715  | 64.281  | 62.5   |
| 18    | 8063.484  | 64.192  | 66.5   |
| 19    | 7328.621  | 58.342  | 74.4   |
| 20    | 6870.613  | 54.696  | 136.1  |
| 21    | 5634.773  | 44.857  | 72.0   |
| 22    | 4825.203  | 38.413  | 39.9   |
| 23    | 3259.773  | 25.950  | 170.3  |
| 24    | 3059.090  | 24.353  | 86.7   |

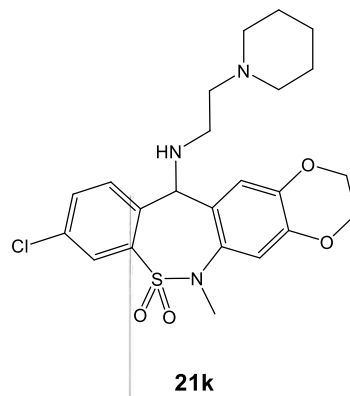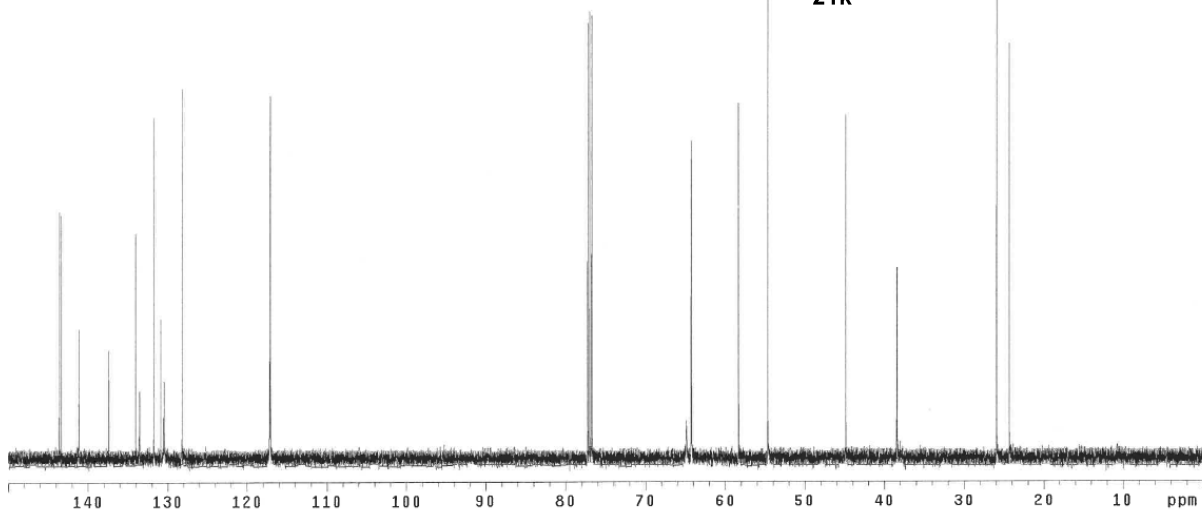

STANDARD 1H  
62658  
1947-BGE  
Berecz Gabor  
2006\_03\_23: (CzB)  
Solvent: CDCl3  
Temp. 25.0 C / 298.1 K  
INOVA-500 "1500"  
PULSE SEQUENCE  
Relax. delay 1.000 sec  
Pulse 6.4 usec  
Acq. time 5.000 sec  
Width 8000.0 Hz  
16 repetitions  
OBSERVE H1, 499.5244637 MHz  
DATA PROCESSING  
FT size 131072  
Total time 1 minutes

| INDEX | FREQUENCY | PPM    | HEIGHT |
|-------|-----------|--------|--------|
| 1     | 3957.764  | 7.923  | 16.5   |
| 2     | 3712.769  | 7.453  | 2.7    |
| 3     | 3704.224  | 7.415  | 37.4   |
| 4     | 3695.190  | 7.397  | 2.1    |
| 5     | 3694.092  | 7.395  | 2.1    |
| 6     | 3632.812  | 7.273  | 2.4    |
| 7     | 3468.384  | 6.943  | 26.2   |
| 8     | 3420.410  | 6.847  | 27.2   |
| 9     | 2434.570  | 4.874  | 15.5   |
| 10    | 2106.079  | 4.216  | 96.6   |
| 11    | 1703.003  | 3.409  | 82.0   |
| 12    | 1285.034  | 2.573  | 9.9    |
| 13    | 1279.297  | 2.561  | 20.4   |
| 14    | 1273.560  | 2.550  | 12.7   |
| 15    | 1206.787  | 2.416  | 1.6    |
| 16    | 1199.707  | 2.402  | 12.9   |
| 17    | 1193.848  | 2.390  | 18.6   |
| 18    | 1188.477  | 2.379  | 9.4    |
| 19    | 1181.152  | 2.365  | 1.8    |
| 20    | 1155.396  | 2.313  | 3.5    |
| 21    | 1140.015  | 2.282  | 2.5    |
| 22    | 1094.727  | 2.192  | 1.7    |
| 23    | 1074.341  | 2.151  | 151.5  |
| 24    | 1047.119  | 2.096  | 2.0    |
| 25    | -0.000    | -0.000 | 2.7    |

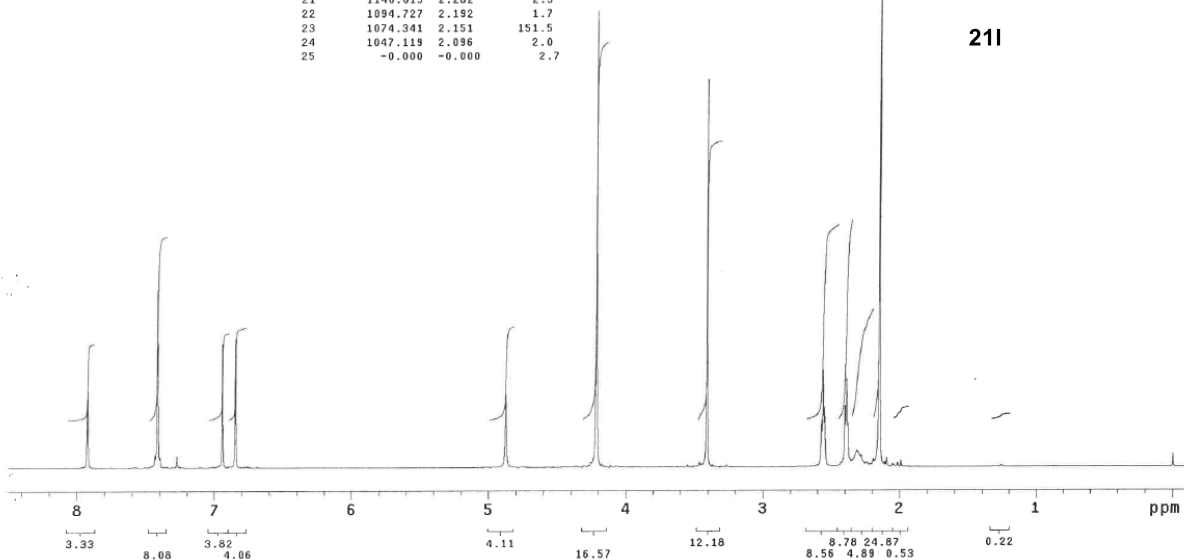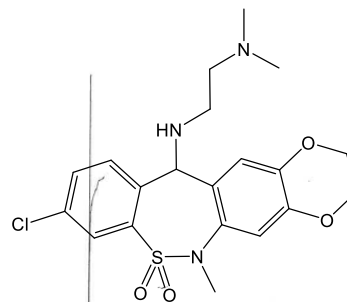

21I

STANDARD 13C  
62658  
1947-BGE  
Berecz Gabor  
2006\_03\_23: (CzB)  
Solvent: CDCl3  
Temp. 25.0 C / 298.1 K  
User: 1-14-87  
INOVA-500 "1500"  
PULSE SEQUENCE  
Relax. delay 3.000 sec  
Pulse 6.0 usec  
Acq. time 1.300 sec  
Width 32000.0 Hz  
256 repetitions  
OBSERVE C13, 125.8055362 MHz  
DECOUPLE H1, 499.5289647 MHz  
Power 32 dB  
continuously on  
WALTZ-16 modulated  
DATA PROCESSING  
Line broadening 0.5 Hz  
FT size 131072  
Total time 18 minutes

| INDEX | FREQUENCY | PPM     | HEIGHT |
|-------|-----------|---------|--------|
| 1     | 18034.676 | 143.571 | 41.9   |
| 2     | 16002.957 | 143.316 | 47.3   |
| 3     | 17729.500 | 141.141 | 26.9   |
| 4     | 17252.449 | 137.344 | 23.8   |
| 5     | 16835.457 | 134.024 | 42.0   |
| 6     | 16764.656 | 133.460 | 16.7   |
| 7     | 16557.137 | 131.808 | 84.8   |
| 8     | 16435.555 | 130.840 | 29.8   |
| 9     | 16391.609 | 130.491 | 17.5   |
| 10    | 16093.758 | 128.120 | 78.8   |
| 11    | 14714.363 | 117.138 | 24.6   |
| 12    | 14706.551 | 117.076 | 82.3   |
| 13    | 9704.598  | 77.257  | 89.3   |
| 14    | 9672.371  | 77.000  | 93.8   |
| 15    | 9640.633  | 76.747  | 89.4   |
| 16    | 8146.980  | 64.857  | 9.4    |
| 17    | 8072.273  | 64.282  | 79.3   |
| 18    | 8050.555  | 64.169  | 73.6   |
| 19    | 7385.750  | 58.797  | 79.4   |
| 20    | 5717.781  | 45.518  | 79.9   |
| 21    | 5704.109  | 45.409  | 200.0  |
| 22    | 4809.090  | 38.284  | 43.8   |

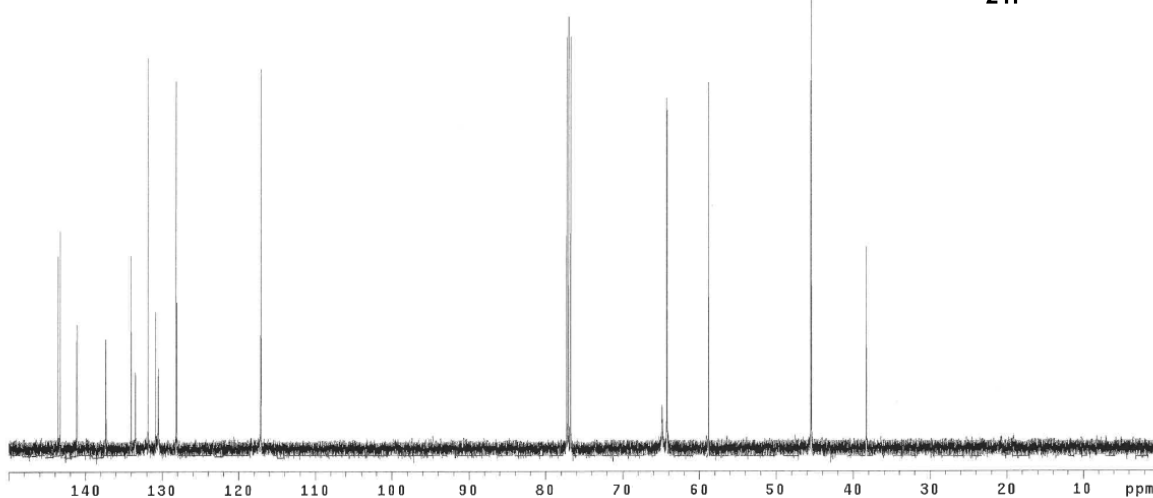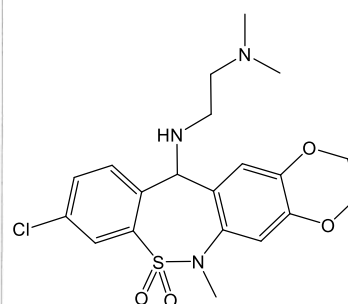

21I

STANDARD 1H  
 62678  
 1948-BGE  
 Berecz Gabor  
 2006/03/24 (SZA)  
 Solvent: CDCl3  
 Temp. 25.0 C / 298.1 K  
 INOVA-500 "1500"  
 PULSE SEQUENCE  
 Relax. delay 3.000 sec  
 Pulse 6.4 usec  
 Acq. time 5.000 sec  
 Width 8000.0 Hz  
 16 repetitions  
 OBSERVE H1, 499.5244625 MHz  
 DATA PROCESSING  
 Line broadening 0.5 Hz  
 FT size 131072  
 Total time 2 minutes

| INDEX | FREQUENCY PPM | HEIGHT |
|-------|---------------|--------|
| 1     | 3958.374      | 7.924  |
| 2     | 3705.811      | 7.419  |
| 3     | 3704.834      | 7.417  |
| 4     | 3458.496      | 6.924  |
| 5     | 3417.114      | 6.841  |
| 6     | 2446.777      | 4.898  |
| 7     | 2108.052      | 4.220  |
| 8     | 1679.932      | 3.363  |
| 9     | 1280.029      | 2.562  |
| 10    | 1273.560      | 2.550  |
| 11    | 1155.273      | 2.313  |
| 12    | 1148.193      | 2.299  |
| 13    | 1141.235      | 2.285  |
| 14    | 1113.847      | 2.229  |
| 15    | 1097.412      | 2.197  |
| 16    | 995.728       | 1.993  |
| 17    | 836.670       | 1.675  |
| 18    | 835.083       | 1.672  |
| 19    | 829.956       | 1.661  |
| 20    | 828.125       | 1.658  |
| 21    | 822.998       | 1.648  |
| 22    | 821.167       | 1.644  |

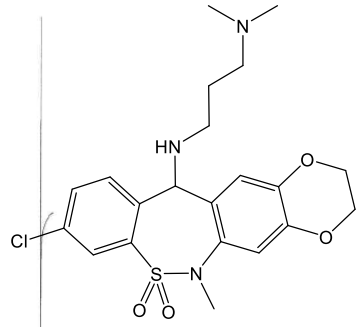

21m

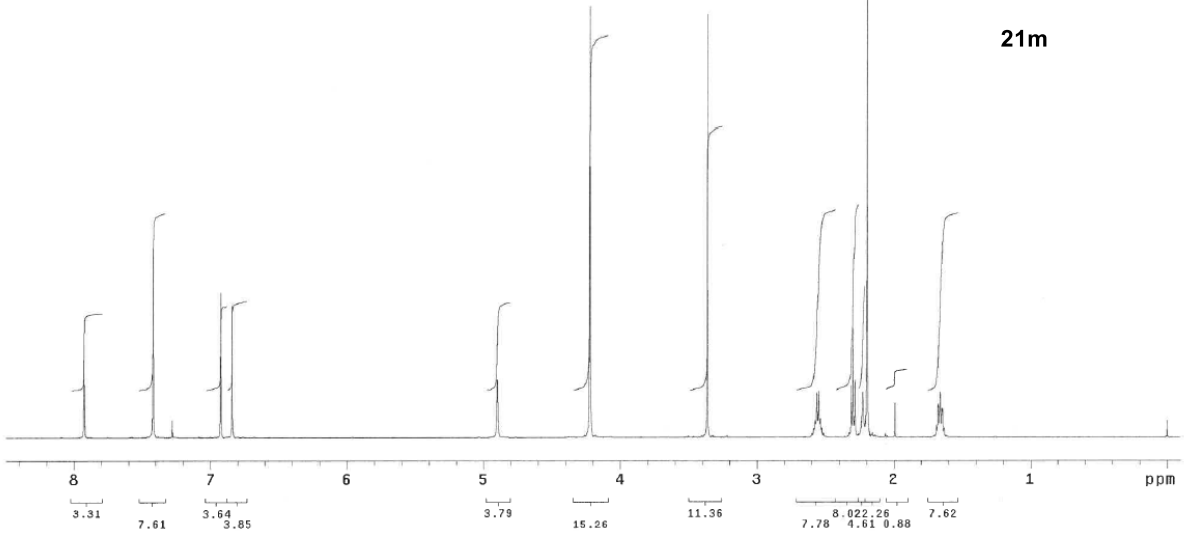

STANDARD 13C  
 62678  
 1948-BGE  
 Berecz Gabor  
 2006/03/24 (SZA)  
 Solvent: CDCl3  
 Temp. 25.0 C / 298.1 K  
 User: 1-14-R7  
 INOVA-500 "1500"  
 PULSE SEQUENCE  
 Relax. delay 3.000 sec  
 Pulse 6.0 usec  
 Acq. time 1.300 sec  
 Width 32000.0 Hz  
 528 repetitions  
 OBSERVE C13, 125.8055367 MHz  
 DECOUPLE H1, 499.5269647 MHz  
 Power 32 dB  
 continuously on  
 WALTZ-16 modulated  
 DATA PROCESSING  
 Line broadening 0.5 Hz  
 FT size 131072  
 Total time 57 minutes

| INDEX | FREQUENCY PPM | HEIGHT  |
|-------|---------------|---------|
| 1     | 18028.816     | 143.524 |
| 2     | 18004.402     | 143.330 |
| 3     | 17652.137     | 140.764 |
| 4     | 17261.238     | 137.414 |
| 5     | 16824.715     | 133.938 |
| 6     | 16729.012     | 133.177 |
| 7     | 16562.936     | 131.855 |
| 8     | 16442.391     | 130.895 |
| 9     | 16357.918     | 130.222 |
| 10    | 16111.824     | 128.263 |
| 11    | 14707.527     | 117.084 |
| 12    | 14586.591     | 116.917 |
| 13    | 9704.109      | 77.253  |
| 14    | 9672.371      | 77.000  |
| 15    | 9640.145      | 76.743  |
| 16    | 8071.785      | 64.258  |
| 17    | 8061.043      | 64.173  |
| 18    | 7290.535      | 58.039  |
| 19    | 5885.750      | 46.855  |
| 20    | 5713.875      | 45.487  |
| 21    | 4818.855      | 38.362  |
| 22    | 3493.172      | 27.809  |

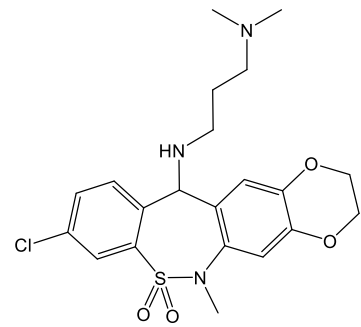

21m

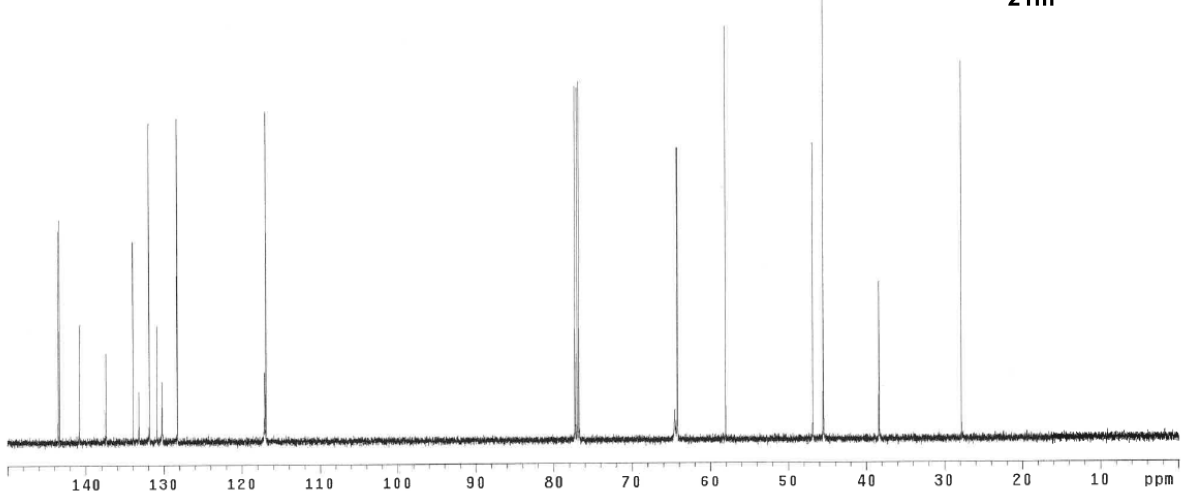



STANDARD 1H  
 85851  
 2014-BGE  
 Berecz Gabor  
 2006/10/05 (SzA)  
 Solvent: CDCl3  
 Temp. 25.0 C / 298.1 K  
 INOVA-500 "1500"  
 PULSE SEQUENCE  
 Relax. delay 3.000 sec  
 Pulse 6.4 usec  
 Acq. time 5.000 sec  
 Width 8000.0 Hz  
 16 repetitions  
 OBSERVE H1, 499.5244663 MHz  
 DATA PROCESSING  
 FT size 131072  
 Total time 2 minutes

| INDEX | FREQUENCY PPM | HEIGHT | INDEX | FREQUENCY PPM | HEIGHT  |       |       |
|-------|---------------|--------|-------|---------------|---------|-------|-------|
| 1     | 3965.698      | 7.393  | 29.4  | 40            | 946.411 | 1.895 | 7.2   |
| 2     | 3963.501      | 7.325  | 28.5  | 41            | 935.059 | 1.872 | 7.8   |
| 3     | 3675.537      | 7.358  | 18.4  | 42            | 925.171 | 1.852 | 3.3   |
| 4     | 3673.218      | 7.353  | 17.6  | 43            | 923.706 | 1.849 | 3.3   |
| 5     | 3667.236      | 7.341  | 24.0  | 44            | 912.109 | 1.826 | 7.1   |
| 6     | 3664.917      | 7.337  | 22.9  | 45            | 910.645 | 1.823 | 7.0   |
| 7     | 3630.615      | 7.268  | 17.9  | 46            | 908.569 | 1.819 | 6.7   |
| 8     | 3612.183      | 7.231  | 26.2  | 47            | 903.320 | 1.808 | 5.0   |
| 9     | 3603.882      | 7.215  | 20.2  | 48            | 898.804 | 1.799 | 9.5   |
| 10    | 3486.450      | 6.980  | 63.2  | 49            | 897.339 | 1.796 | 9.3   |
| 11    | 3368.952      | 6.744  | 57.7  | 50            | 835.893 | 1.673 | 3.2   |
| 12    | 2127.197      | 4.258  | 7.3   | 51            | 832.842 | 1.667 | 3.5   |
| 13    | 2124.268      | 4.253  | 5.0   | 52            | 820.801 | 1.643 | 22.5  |
| 14    | 2122.192      | 4.248  | 7.3   | 53            | 811.279 | 1.624 | 6.4   |
| 15    | 2120.972      | 4.246  | 6.2   | 54            | 619.629 | 1.240 | 57.0  |
| 16    | 2115.601      | 4.235  | 24.3  | 55            | 612.549 | 1.226 | 122.3 |
| 17    | 2114.014      | 4.232  | 12.5  | 56            | 605.347 | 1.212 | 54.1  |
| 18    | 2112.305      | 4.229  | 22.8  | 57            | 1.099   | 0.002 | 3.3   |
| 19    | 2110.962      | 4.226  | 30.4  | 58            | 0.000   | 0.000 | 22.3  |
| 20    | 2108.765      | 4.222  | 18.8  |               |         |       |       |
| 21    | 2106.445      | 4.217  | 22.4  |               |         |       |       |
| 22    | 2105.347      | 4.215  | 17.4  |               |         |       |       |
| 23    | 2099.976      | 4.204  | 8.6   |               |         |       |       |
| 24    | 2097.290      | 4.199  | 5.0   |               |         |       |       |
| 25    | 2094.604      | 4.193  | 7.0   |               |         |       |       |
| 26    | 2062.012      | 4.128  | 14.8  |               |         |       |       |
| 27    | 2054.932      | 4.114  | 47.5  |               |         |       |       |
| 28    | 2047.729      | 4.099  | 48.6  |               |         |       |       |
| 29    | 2040.649      | 4.085  | 15.2  |               |         |       |       |
| 30    | 1973.145      | 3.950  | 22.7  |               |         |       |       |
| 31    | 1744.507      | 3.482  | 197.3 |               |         |       |       |
| 32    | 1326.660      | 2.656  | 3.2   |               |         |       |       |
| 33    | 1315.796      | 2.634  | 3.4   |               |         |       |       |
| 34    | 1238.892      | 2.480  | 3.7   |               |         |       |       |
| 35    | 1227.783      | 2.458  | 4.0   |               |         |       |       |
| 36    | 1135.986      | 2.274  | 3.4   |               |         |       |       |
| 37    | 1131.958      | 2.266  | 5.8   |               |         |       |       |
| 38    | 1127.930      | 2.258  | 3.5   |               |         |       |       |
| 39    | 999.146       | 2.000  | 7.1   |               |         |       |       |

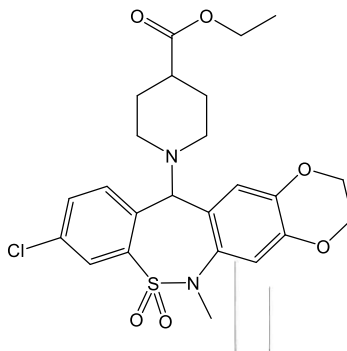

21n

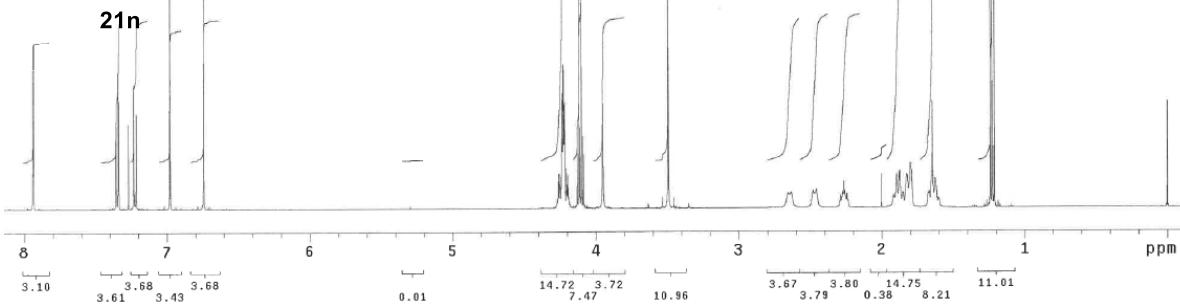

STANDARD 13C  
 85851  
 2014-BGE  
 Berecz Gabor  
 2006/10/05 (SzA)  
 Solvent: CDCl3  
 Temp. 25.0 C / 298.1 K  
 User: i-14-87  
 INOVA-500 "1500"  
 PULSE SEQUENCE  
 Relax. delay 3.000 sec  
 Pulse 6.0 usec  
 Acq. time 1.300 sec  
 Width 32000.0 Hz  
 666 repetitions  
 OBSERVE C13, 125.6055323 MHz  
 DECOUPLE H1, 499.5269647 MHz  
 Power 32 dB  
 continuously on  
 WALTZ-16 modulated  
 DATA PROCESSING  
 Line broadening 0.5 Hz  
 FT size 131072  
 Total time 47 minutes

| INDEX | FREQUENCY PPM | HEIGHT  |       |
|-------|---------------|---------|-------|
| 1     | 21956.062     | 174.788 | 43.2  |
| 2     | 18088.875     | 144.002 | 42.1  |
| 3     | 18021.980     | 143.470 | 49.7  |
| 4     | 17983.406     | 143.163 | 13.8  |
| 5     | 16969.734     | 135.093 | 34.9  |
| 6     | 16883.308     | 134.405 | 15.2  |
| 7     | 16783.899     | 133.612 | 47.7  |
| 8     | 16765.632     | 133.468 | 21.9  |
| 9     | 16457.527     | 131.015 | 59.7  |
| 10    | 16366.707     | 130.292 | 31.9  |
| 11    | 16169.929     | 128.726 | 64.6  |
| 12    | 15029.793     | 119.649 | 43.4  |
| 13    | 14948.738     | 119.004 | 34.0  |
| 14    | 9704.597      | 77.257  | 115.6 |
| 15    | 9672.371      | 77.009  | 119.0 |
| 16    | 9640.632      | 76.747  | 119.2 |
| 17    | 8076.179      | 64.293  | 56.4  |
| 18    | 8057.625      | 64.145  | 55.7  |
| 19    | 7580.574      | 60.348  | 55.8  |
| 20    | 6560.554      | 52.227  | 19.7  |
| 21    | 6533.211      | 52.010  | 29.6  |
| 22    | 5116.707      | 40.733  | 9.9   |
| 23    | 5076.179      | 40.411  | 26.9  |
| 24    | 3560.554      | 28.345  | 32.4  |
| 25    | 3509.773      | 27.941  | 49.0  |
| 26    | 1777.351      | 14.149  | 72.2  |

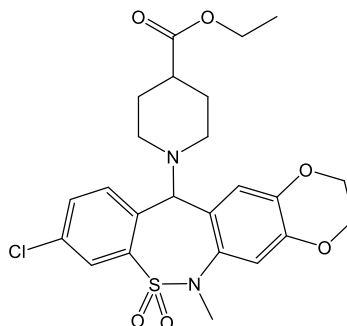

21n

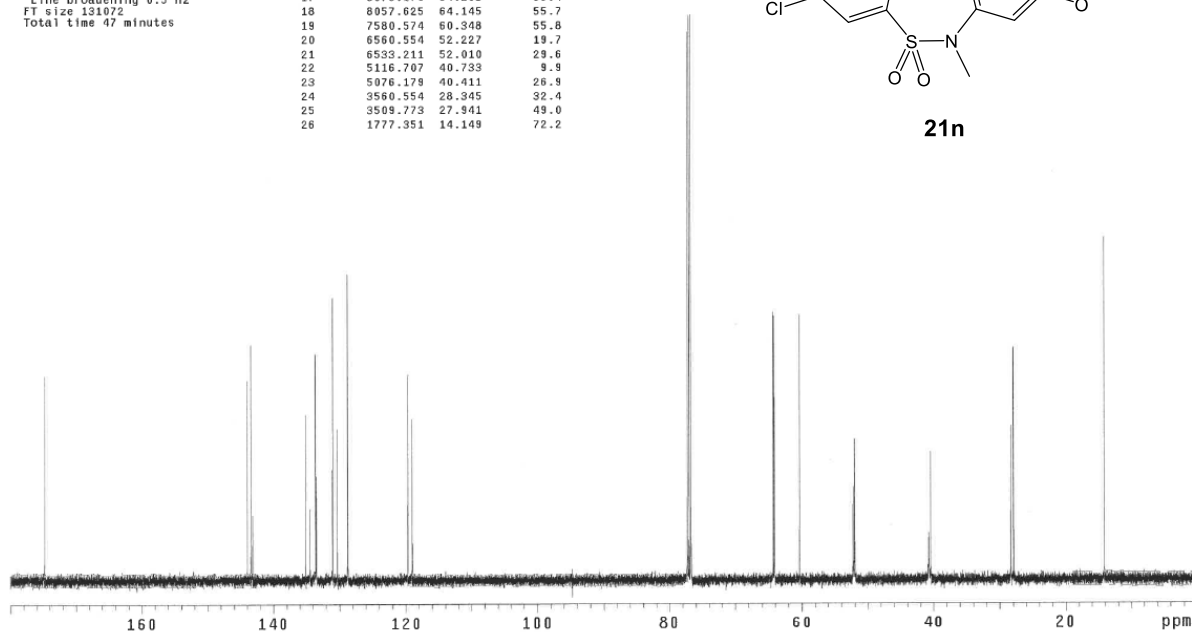

STANDARD 1H  
 65479  
 2009-BGE  
 Berecz Gabor  
 2006.09.25. (BT)  
 Solvent: DMSO  
 Temp. 25.0 C / 298.1 K  
 INOVA-500 "1500"  
 PULSE SEQUENCE  
 Relax. delay 3.000 sec  
 Pulse 6.4 usec  
 Acq. time 5.000 sec  
 Width 8000.0 Hz  
 16 repetitions  
 OBSERVE H1, 499.5268306 MHz  
 DATA PROCESSING  
 FT size 131072  
 Total time 2 minutes

| INDEX | FREQUENCY | PPM   | HEIGHT | INDEX | FREQUENCY | PPM   | HEIGHT |
|-------|-----------|-------|--------|-------|-----------|-------|--------|
| 1     | 3882.568  | 7.772 | 34.1   | 40    | 898.804   | 1.799 | 5.3    |
| 2     | 3880.249  | 7.768 | 35.0   | 41    | 896.851   | 1.795 | 4.4    |
| 3     | 3821.045  | 7.649 | 19.3   | 42    | 809.937   | 1.621 | 9.8    |
| 4     | 3818.848  | 7.645 | 17.4   | 43    | 798.584   | 1.599 | 12.8   |
| 5     | 3812.744  | 7.633 | 26.1   | 44    | 735.474   | 1.472 | 5.1    |
| 6     | 3810.425  | 7.628 | 25.2   | 45    | 733.032   | 1.467 | 5.6    |
| 7     | 3767.456  | 7.542 | 32.5   | 46    | 723.267   | 1.448 | 6.6    |
| 8     | 3758.911  | 7.525 | 23.8   | 47    | 710.205   | 1.422 | 6.6    |
| 9     | 3600.586  | 7.208 | 14.6   | 48    | 700.562   | 1.402 | 4.8    |
| 10    | 3513.550  | 7.034 | 75.3   | 49    | 697.876   | 1.397 | 4.4    |
| 11    | 3474.976  | 6.957 | 65.7   |       |           |       |        |
| 12    | 3362.427  | 6.731 | 14.3   |       |           |       |        |
| 13    | 2141.479  | 4.287 | 7.9    |       |           |       |        |
| 14    | 2138.306  | 4.281 | 6.1    |       |           |       |        |
| 15    | 2135.976  | 4.275 | 8.3    |       |           |       |        |
| 16    | 2129.895  | 4.263 | 34.6   |       |           |       |        |
| 17    | 2124.756  | 4.254 | 44.5   |       |           |       |        |
| 18    | 2122.681  | 4.249 | 53.8   |       |           |       |        |
| 19    | 2116.893  | 4.237 | 7.5    |       |           |       |        |
| 20    | 2113.525  | 4.231 | 5.8    |       |           |       |        |
| 21    | 2111.450  | 4.227 | 5.9    |       |           |       |        |
| 22    | 2108.521  | 4.221 | 7.3    |       |           |       |        |
| 23    | 1710.897  | 3.425 | 165.7  |       |           |       |        |
| 24    | 1670.776  | 3.345 | 82.0   |       |           |       |        |
| 25    | 1275.513  | 2.553 | 6.3    |       |           |       |        |
| 26    | 1263.916  | 2.530 | 6.7    |       |           |       |        |
| 27    | 1255.127  | 2.513 | 6.3    |       |           |       |        |
| 28    | 1253.296  | 2.509 | 8.2    |       |           |       |        |
| 29    | 1251.465  | 2.505 | 5.6    |       |           |       |        |
| 30    | 1180.094  | 2.322 | 6.9    |       |           |       |        |
| 31    | 1148.926  | 2.300 | 6.9    |       |           |       |        |
| 32    | 1024.658  | 2.051 | 4.8    |       |           |       |        |
| 33    | 1020.874  | 2.044 | 7.9    |       |           |       |        |
| 34    | 1017.090  | 2.036 | 4.7    |       |           |       |        |
| 35    | 1009.277  | 2.020 | 4.3    |       |           |       |        |
| 36    | 927.124   | 1.856 | 5.1    |       |           |       |        |
| 37    | 917.725   | 1.837 | 9.8    |       |           |       |        |
| 38    | 910.400   | 1.823 | 9.6    |       |           |       |        |
| 39    | 907.959   | 1.818 | 10.4   |       |           |       |        |

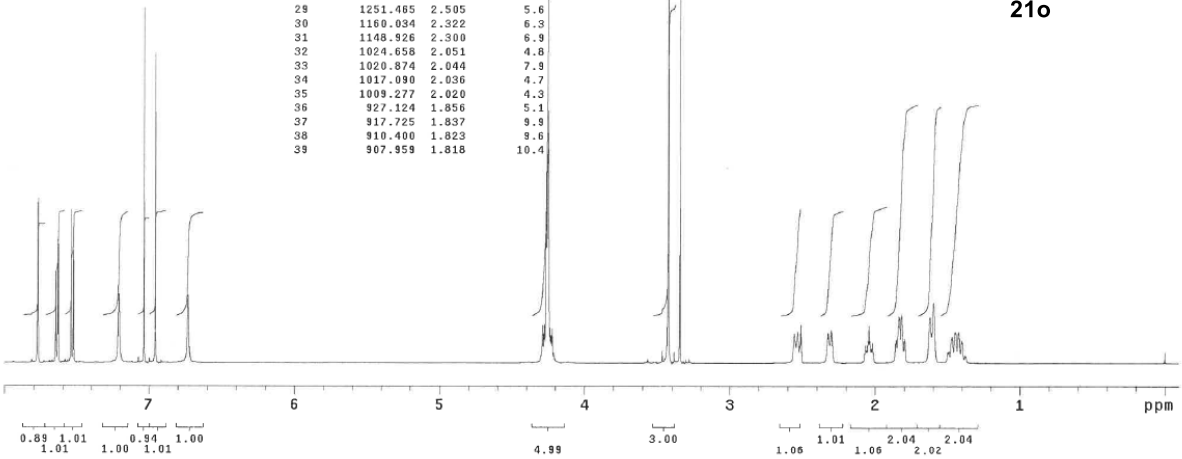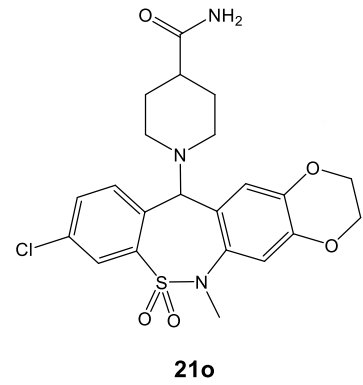

STANDARD 13C  
 65479  
 2009-BGE  
 Berecz Gabor  
 2006.09.25. (BT)  
 Solvent: DMSO  
 Temp. 25.0 C / 298.1 K  
 User: 1-14-87  
 INOVA-500 "1500"  
 PULSE SEQUENCE  
 Relax. delay 3.000 sec  
 Pulse 6.0 usec  
 Acq. time 1.300 sec  
 Width 32000.0 Hz  
 512 repetitions  
 OBSERVE C13, 125.8061592 MHz  
 DECOUPLE H1, 499.5283374 MHz  
 Power 32 dB  
 continuously on  
 WALTZ-16 modulated  
 DATA PROCESSING  
 Line broadening 0.5 Hz  
 FT size 131072  
 Total time 36 minutes

| INDEX | FREQUENCY | PPM     | HEIGHT |
|-------|-----------|---------|--------|
| 1     | 22175.239 | 176.539 | 97.7   |
| 2     | 18057.563 | 143.758 | 78.3   |
| 3     | 18011.177 | 143.388 | 77.2   |
| 4     | 18008.735 | 143.369 | 60.6   |
| 5     | 16972.602 | 135.120 | 55.6   |
| 6     | 16956.001 | 134.988 | 44.7   |
| 7     | 16814.399 | 133.861 | 64.6   |
| 8     | 16789.009 | 133.659 | 71.6   |
| 9     | 16509.223 | 131.431 | 56.8   |
| 10    | 16326.116 | 129.973 | 79.1   |
| 11    | 16005.805 | 127.423 | 57.3   |
| 12    | 15000.434 | 119.420 | 60.3   |
| 13    | 14987.720 | 119.159 | 54.0   |
| 14    | 9372.016  | 74.611  | 45.1   |
| 15    | 8075.630  | 64.291  | 46.9   |
| 16    | 8067.329  | 64.225  | 48.0   |
| 17    | 6541.450  | 52.077  | 39.6   |
| 18    | 6503.852  | 51.778  | 42.1   |
| 19    | 5222.602  | 41.578  | 33.4   |
| 20    | 5059.516  | 40.279  | 75.8   |
| 21    | 5050.239  | 40.205  | 51.1   |
| 22    | 5029.243  | 40.038  | 161.5  |
| 23    | 5007.759  | 39.867  | 323.7  |
| 24    | 4987.251  | 39.704  | 382.3  |
| 25    | 4965.766  | 39.533  | 327.1  |
| 26    | 4944.778  | 39.366  | 163.7  |
| 27    | 4923.774  | 39.199  | 58.1   |
| 28    | 3617.194  | 28.796  | 43.3   |
| 29    | 3558.540  | 28.330  | 46.4   |

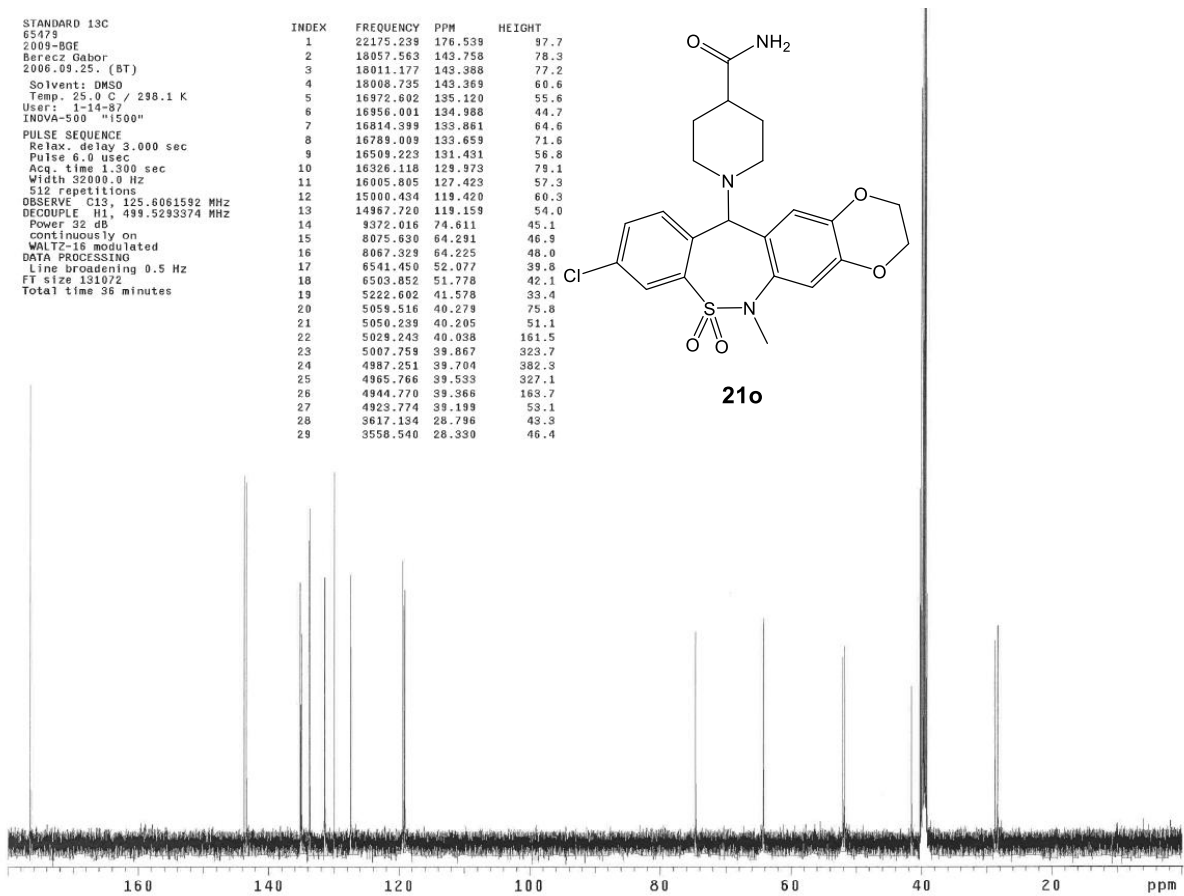

STANDARD 1H  
67546  
2044-BGE  
Berecz Gabor  
2007.02.07. (BB)  
Solvent: CDCl3  
Temp. 25.0 C / 298.1 K  
INOVA-500 "1500"  
PULSE SEQUENCE  
Relax. delay 1.000 sec  
Pulse 6.4 usec  
Acq. time 5.000 sec  
Width 6800.0 Hz  
16 repetitions  
OBSERVE H1, 499.5244648 MHz  
DATA PROCESSING  
FT size 131072  
Total time 1 minutes

| INDEX | FREQUENCY | PPM   | HEIGHT | INDEX | FREQUENCY | PPM    | HEIGHT |
|-------|-----------|-------|--------|-------|-----------|--------|--------|
| 1     | 3966.675  | 7.941 | 25.3   | 40    | -0.000    | -0.000 | 6.4    |
| 2     | 3864.478  | 7.937 | 24.9   |       |           |        |        |
| 3     | 3686.768  | 7.381 | 14.5   |       |           |        |        |
| 4     | 3684.570  | 7.376 | 14.1   |       |           |        |        |
| 5     | 3678.467  | 7.364 | 18.6   |       |           |        |        |
| 6     | 3676.270  | 7.360 | 17.9   |       |           |        |        |
| 7     | 3632.080  | 7.271 | 6.0    |       |           |        |        |
| 8     | 3619.995  | 7.247 | 26.2   |       |           |        |        |
| 9     | 3611.694  | 7.230 | 20.7   |       |           |        |        |
| 10    | 3487.793  | 6.982 | 55.8   |       |           |        |        |
| 11    | 3372.681  | 6.752 | 53.2   |       |           |        |        |
| 12    | 2131.104  | 4.266 | 1.9    |       |           |        |        |
| 13    | 2125.732  | 4.256 | 7.6    |       |           |        |        |
| 14    | 2122.559  | 4.249 | 6.4    |       |           |        |        |
| 15    | 2120.728  | 4.245 | 9.2    |       |           |        |        |
| 16    | 2113.892  | 4.232 | 29.3   |       |           |        |        |
| 17    | 2109.863  | 4.224 | 37.6   |       |           |        |        |
| 18    | 2105.469  | 4.215 | 28.5   |       |           |        |        |
| 19    | 2099.121  | 4.202 | 8.9    |       |           |        |        |
| 20    | 2096.558  | 4.197 | 5.6    |       |           |        |        |
| 21    | 2093.628  | 4.191 | 7.4    |       |           |        |        |
| 22    | 2093.906  | 4.012 | 27.4   |       |           |        |        |
| 23    | 1736.328  | 3.476 | 3.0    |       |           |        |        |
| 24    | 1729.370  | 3.462 | 167.9  |       |           |        |        |
| 25    | 1324.951  | 2.652 | 3.8    |       |           |        |        |
| 26    | 1233.398  | 2.469 | 3.4    |       |           |        |        |
| 27    | 1185.181  | 2.373 | 4.9    |       |           |        |        |
| 28    | 1116.455  | 2.235 | 2.2    |       |           |        |        |
| 29    | 1065.063  | 2.132 | 3.1    |       |           |        |        |
| 30    | 910.767   | 1.823 | 10.1   |       |           |        |        |
| 31    | 904.663   | 1.811 | 10.3   |       |           |        |        |
| 32    | 897.461   | 1.797 | 10.5   |       |           |        |        |
| 33    | 893.677   | 1.789 | 10.3   |       |           |        |        |
| 34    | 890.137   | 1.782 | 9.9    |       |           |        |        |
| 35    | 886.597   | 1.775 | 9.7    |       |           |        |        |
| 36    | 880.005   | 1.762 | 5.9    |       |           |        |        |
| 37    | 876.709   | 1.755 | 4.8    |       |           |        |        |
| 38    | 873.169   | 1.748 | 3.6    |       |           |        |        |
| 39    | 832.886   | 1.667 | 10.7   |       |           |        |        |

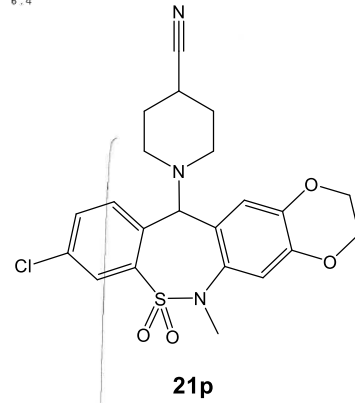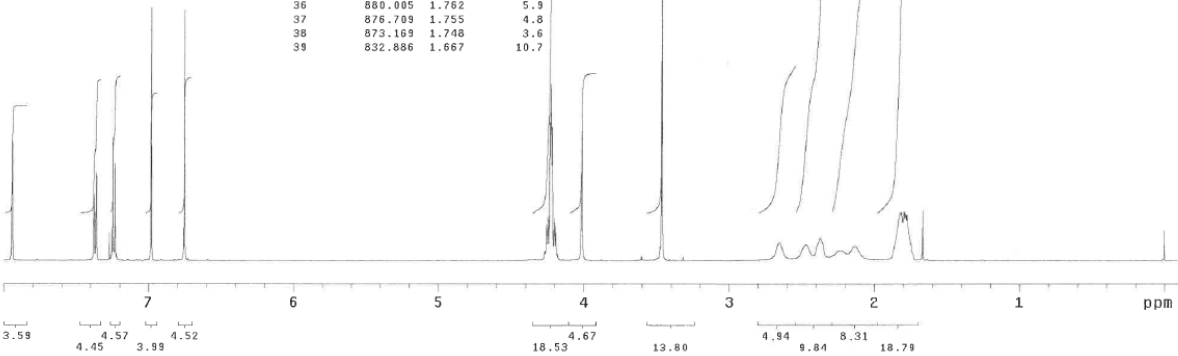

STANDARD 13C  
67546  
2044-BGE  
Berecz Gabor  
2007.02.07. (BB)  
Solvent: CDCl3  
Temp. 25.0 C / 298.1 K  
User: 1-14-87  
INOVA-500 "1500"  
PULSE SEQUENCE  
Relax. delay 3.000 sec  
Pulse 6.0 usec  
Acq. time 1.300 sec  
Width 32000.0 Hz  
400 repetitions  
OBSERVE C13, 125.6055381 MHz  
DECOUPLE H1, 499.5269647 MHz  
Power 92 dB  
continuously on  
WALTZ-16 modulated  
DATA PROCESSING  
Line broadening 0.5 Hz  
FT size 131072  
Total time 28 minutes

| INDEX | FREQUENCY | PPM     | HEIGHT |
|-------|-----------|---------|--------|
| 1     | 18106.942 | 144.146 | 73.3   |
| 2     | 18030.261 | 143.536 | 82.2   |
| 3     | 17972.664 | 143.077 | 32.6   |
| 4     | 16994.149 | 135.207 | 61.4   |
| 5     | 16809.090 | 133.814 | 34.4   |
| 6     | 16770.516 | 133.507 | 46.1   |
| 7     | 16689.949 | 132.866 | 63.3   |
| 8     | 16477.059 | 131.171 | 100.4  |
| 9     | 16346.688 | 130.133 | 51.8   |
| 10    | 16169.930 | 128.726 | 112.5  |
| 11    | 15235.848 | 121.290 | 36.5   |
| 12    | 15012.215 | 119.510 | 90.6   |
| 13    | 14956.063 | 119.053 | 67.9   |
| 14    | 9704.598  | 77.257  | 131.3  |
| 15    | 9672.371  | 77.000  | 132.9  |
| 16    | 9640.633  | 76.747  | 133.3  |
| 17    | 9588.875  | 76.335  | 28.7   |
| 18    | 8070.320  | 64.246  | 96.0   |
| 19    | 8054.695  | 64.122  | 97.2   |
| 20    | 6318.367  | 50.299  | 18.1   |
| 21    | 5036.629  | 40.096  | 57.9   |
| 22    | 3594.246  | 28.613  | 61.0   |
| 23    | 3242.684  | 25.814  | 25.3   |

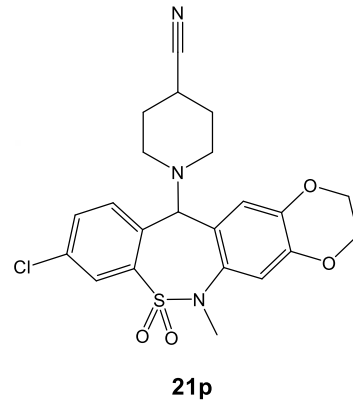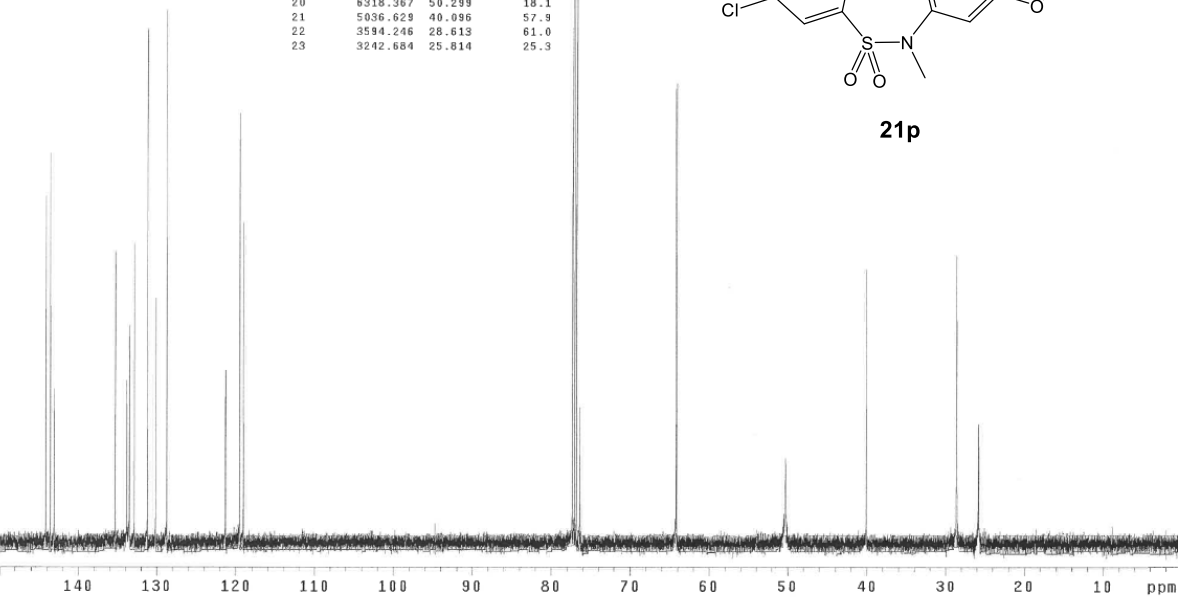

STANDARD 1H  
 68717  
 2068-BGE  
 Berecz Gabor  
 2007.04.10. (BB)  
 Solvent: CDCl3  
 Temp. 25.0 C / 298.1 K  
 INOVA-500 "1500"  
 PULSE SEQUENCE  
 Relax. delay 1.000 sec  
 Pulse 6.4 usec  
 Acq. time 5.000 sec  
 Width 8000.0 Hz  
 16 repetitions  
 OBSERVE H1, 499.5244691 MHz  
 DATA PROCESSING  
 FT size 131072  
 Total time 1 minutes

| INDEX | FREQUENCY | PPM   | HEIGHT |
|-------|-----------|-------|--------|
| 1     | 3950.317  | 7.908 | 16.9   |
| 2     | 3948.242  | 7.904 | 16.9   |
| 3     | 3787.588  | 7.582 | 17.6   |
| 4     | 3779.175  | 7.566 | 22.0   |
| 5     | 3720.581  | 7.448 | 14.2   |
| 6     | 3718.384  | 7.444 | 13.8   |
| 7     | 3712.036  | 7.431 | 11.0   |
| 8     | 3709.961  | 7.427 | 10.8   |
| 9     | 3626.953  | 7.261 | 4.8    |
| 10    | 3491.338  | 6.989 | 41.3   |
| 11    | 3450.195  | 6.907 | 39.7   |
| 12    | 2743.774  | 5.493 | 31.3   |
| 13    | 2119.507  | 4.243 | 4.9    |
| 14    | 2113.159  | 4.230 | 135.2  |
| 15    | 2106.812  | 4.218 | 4.9    |
| 16    | 1726.074  | 3.455 | 152.1  |
| 17    | 1700.439  | 3.404 | 153.4  |
| 18    | 997.070   | 1.996 | 1.7    |
| 19    | 797.729   | 1.597 | 3.2    |
| 20    | 0.000     | 0.000 | 4.5    |

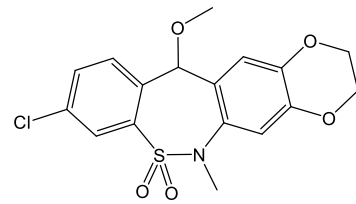

23a

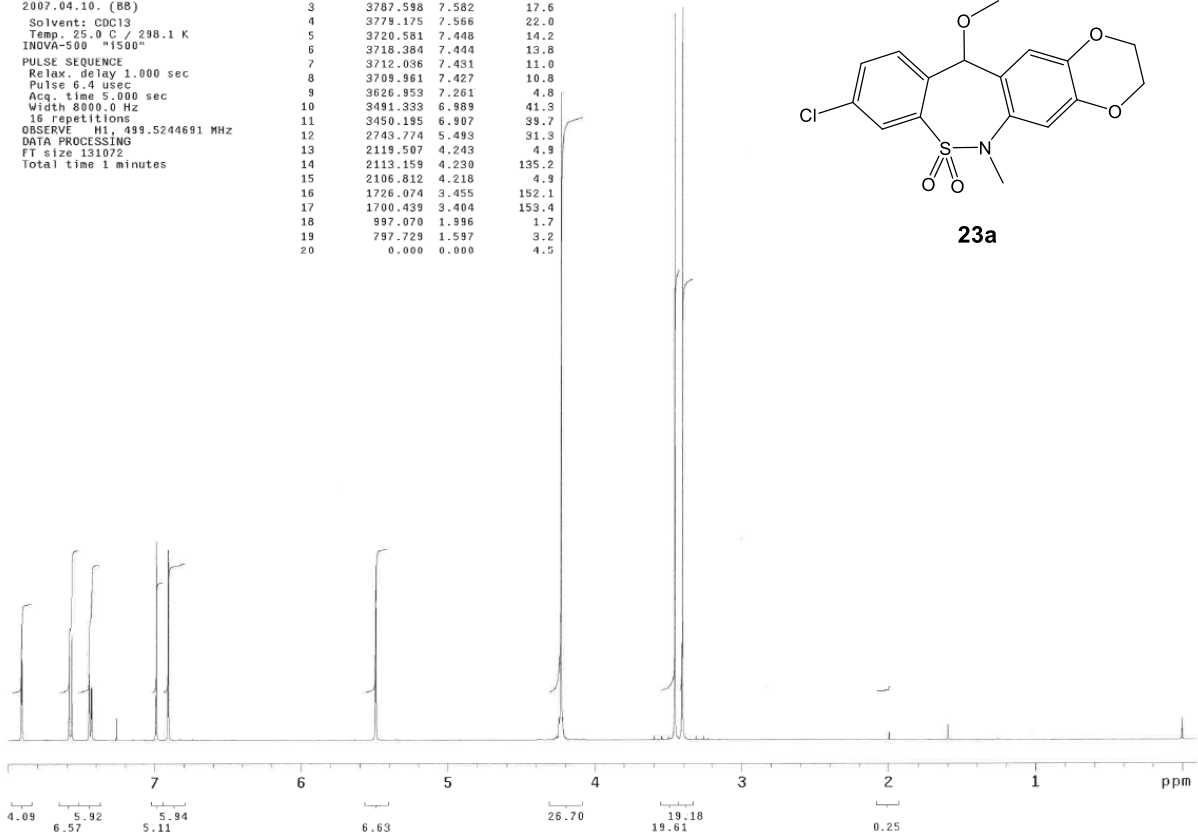

STANDARD 13C  
 68717  
 2068-BGE  
 Berecz Gabor  
 2007.04.10. (BB)  
 Solvent: DMSO  
 Temp. 25.0 C / 298.1 K  
 User: 1-14-87  
 INOVA-500 "1500"  
 PULSE SEQUENCE  
 Relax. delay 3.000 sec  
 Pulse 6.0 usec  
 Acq. time 1.300 sec  
 Width 32000.0 Hz  
 318 repetitions  
 OBSERVE C13, 125.6055317 MHz  
 DECOUPLE H1, 499.5293374 MHz  
 Power 32 dB  
 continuously on  
 WALTZ-16 modulated  
 DATA PROCESSING  
 Line broadening 1.0 Hz  
 FT size 131072  
 Total time 22 minutes

| INDEX | FREQUENCY | PPM     | HEIGHT |
|-------|-----------|---------|--------|
| 1     | 18079.597 | 143.328 | 46.8   |
| 2     | 18055.183 | 143.734 | 51.9   |
| 3     | 17638.679 | 140.418 | 38.1   |
| 4     | 17063.972 | 135.843 | 43.1   |
| 5     | 16903.816 | 134.568 | 47.5   |
| 6     | 16691.414 | 132.877 | 50.6   |
| 7     | 16564.949 | 131.671 | 107.0  |
| 8     | 16313.972 | 129.873 | 42.7   |
| 9     | 16145.027 | 128.528 | 62.5   |
| 10    | 16079.109 | 128.003 | 118.0  |
| 11    | 14763.191 | 117.527 | 96.0   |
| 12    | 14491.218 | 115.362 | 70.9   |
| 13    | 10113.777 | 80.514  | 50.2   |
| 14    | 9704.109  | 77.253  | 139.9  |
| 15    | 9672.371  | 77.000  | 139.8  |
| 16    | 9640.184  | 76.743  | 139.3  |
| 17    | 8078.132  | 64.309  | 101.5  |
| 18    | 8063.484  | 64.192  | 99.4   |
| 19    | 7265.632  | 57.840  | 51.0   |
| 20    | 7267.097  | 57.852  | 52.4   |
| 21    | 4773.445  | 38.001  | 43.1   |

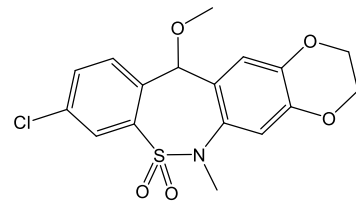

23a

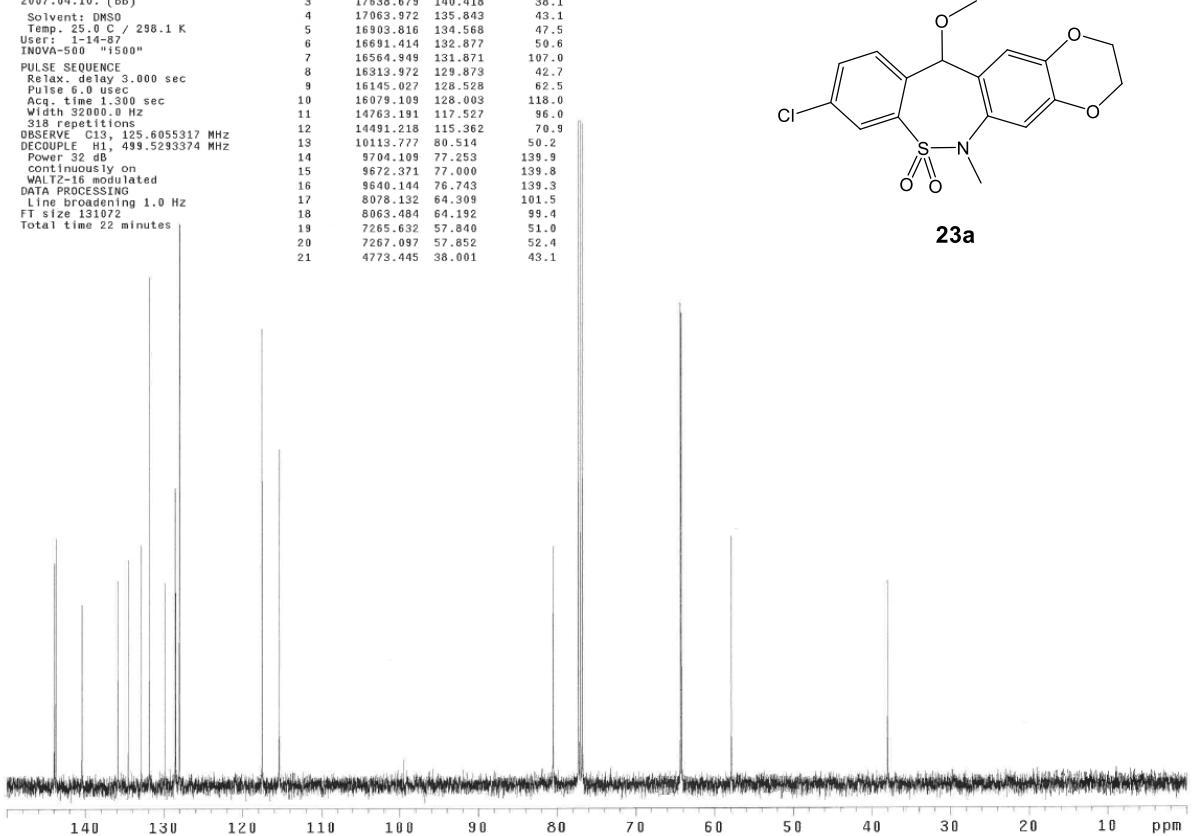

\* STANDARD 1H  
 62848  
 1950-BGE  
 Berecz Gabor  
 2006/04/04 (SZA)  
 Solvent: CDCl3  
 Temp: 25.0 C / 298.1 K  
 INOVA-500 "1500"  
 PULSE SEQUENCE  
 Relax. delay 3.000 sec  
 Pulse 5.4 usec  
 Acq. time 5.000 sec  
 Width 8000.0 Hz  
 16 repetitions  
 OBSERVE H1, 499.5244667 MHz  
 DATA PROCESSING  
 FT size 131072  
 Total time 2 minutes

| INDEX | FREQUENCY | PPM   | HEIGHT |
|-------|-----------|-------|--------|
| 1     | 3944.336  | 7.896 | 19.7   |
| 2     | 3942.139  | 7.892 | 19.8   |
| 3     | 3818.237  | 7.644 | 12.7   |
| 4     | 3809.814  | 7.627 | 14.7   |
| 5     | 3717.285  | 7.442 | 13.1   |
| 6     | 3715.088  | 7.437 | 12.7   |
| 7     | 3708.862  | 7.425 | 11.2   |
| 8     | 3706.665  | 7.420 | 11.0   |
| 9     | 3630.615  | 7.268 | 8.4    |
| 10    | 3485.718  | 6.978 | 45.6   |
| 11    | 3467.183  | 6.941 | 52.9   |
| 12    | 2848.633  | 5.703 | 18.6   |
| 13    | 2110.474  | 4.225 | 89.5   |
| 14    | 1846.069  | 3.696 | 6.5    |
| 15    | 1842.041  | 3.688 | 6.1    |
| 16    | 1840.210  | 3.684 | 3.9    |
| 17    | 1836.182  | 3.676 | 11.4   |
| 18    | 1830.322  | 3.664 | 5.7    |
| 19    | 1819.336  | 3.642 | 5.8    |
| 20    | 1813.354  | 3.630 | 11.9   |
| 21    | 1809.448  | 3.622 | 4.0    |
| 22    | 1807.373  | 3.618 | 6.4    |
| 23    | 1803.589  | 3.611 | 6.8    |
| 24    | 1701.538  | 3.406 | 144.2  |
| 25    | 1311.401  | 2.625 | 8.5    |
| 26    | 1309.204  | 2.621 | 8.3    |
| 27    | 1305.420  | 2.613 | 15.8   |
| 28    | 1303.345  | 2.609 | 16.3   |
| 29    | 1299.561  | 2.602 | 8.0    |
| 30    | 1297.363  | 2.597 | 8.0    |
| 31    | 1136.719  | 2.276 | 244.7  |
| 32    | 997.070   | 1.996 | 4.3    |
| 33    | 0.000     | 0.000 | 10.0   |

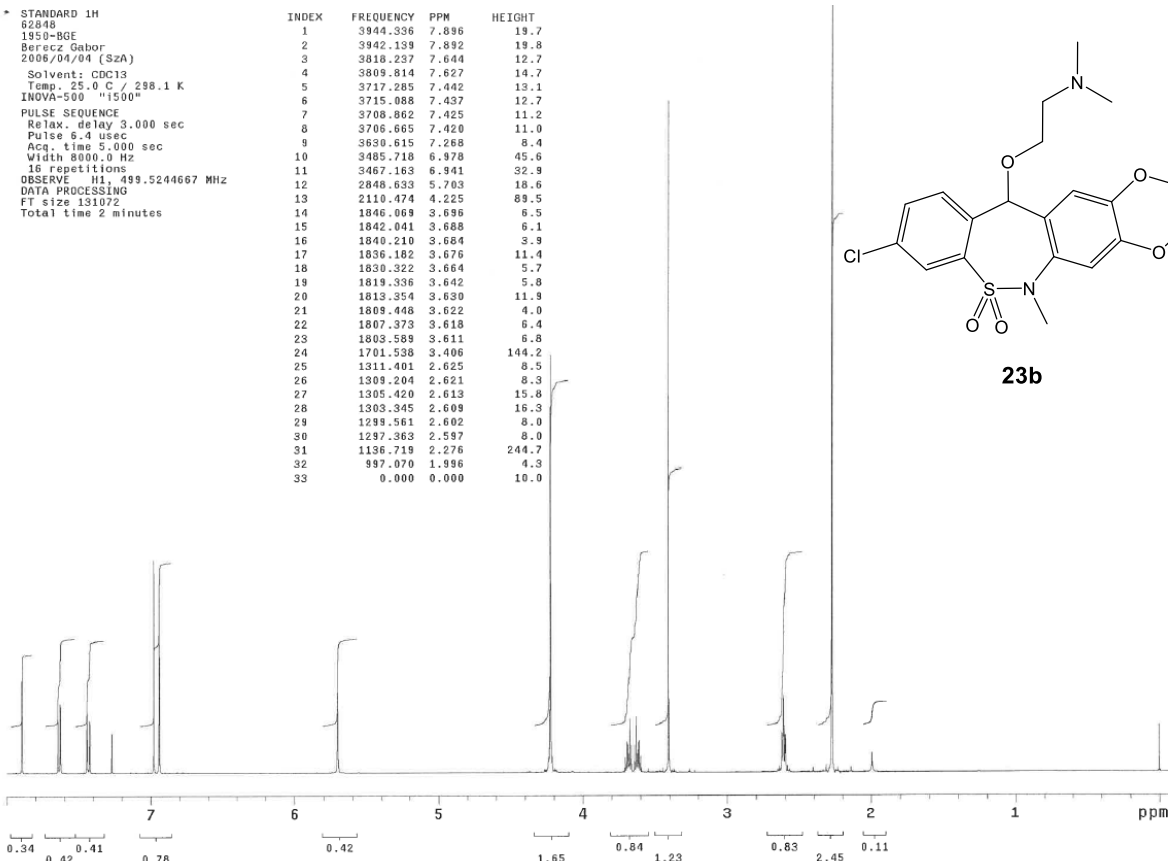

STANDARD 13C  
 62848  
 1950-BGE  
 Berecz Gabor  
 2006/04/04 (SZA)  
 Solvent: CDCl3  
 Temp: 25.0 C / 298.1 K  
 User: 1-14-87  
 INOVA-500 "1500"  
 PULSE SEQUENCE  
 Relax. delay 3.000 sec  
 Pulse 6.0 usec  
 Acq. time 1.300 sec  
 Width 32000.0 Hz  
 704 repetitions  
 OBSERVE C13, 125.6055328 MHz  
 DECOUPLE H1, 499.5269647 MHz  
 Power 32 dB  
 continuously on  
 WALTZ-16 modulated  
 DATA PROCESSING  
 Line broadening 0.5 Hz  
 FT size 131072  
 Total time 50 minutes

| INDEX | FREQUENCY | PPM     | HEIGHT |
|-------|-----------|---------|--------|
| 1     | 18067.390 | 143.831 | 40.8   |
| 2     | 18054.207 | 143.726 | 43.0   |
| 3     | 17622.078 | 140.286 | 22.1   |
| 4     | 17110.847 | 136.216 | 21.0   |
| 5     | 16984.285 | 134.413 | 33.8   |
| 6     | 16752.937 | 133.367 | 31.7   |
| 7     | 16564.461 | 131.867 | 62.6   |
| 8     | 16290.535 | 129.686 | 25.1   |
| 9     | 16119.636 | 128.326 | 19.8   |
| 10    | 16070.808 | 127.937 | 64.8   |
| 11    | 14738.289 | 117.329 | 52.0   |
| 12    | 14464.368 | 115.148 | 27.1   |
| 13    | 9881.843  | 78.668  | 13.9   |
| 14    | 9704.597  | 77.257  | 103.2  |
| 15    | 9672.371  | 77.000  | 106.9  |
| 16    | 9640.633  | 76.747  | 103.6  |
| 17    | 8617.683  | 68.604  | 57.8   |
| 18    | 8075.691  | 64.289  | 61.7   |
| 19    | 8061.531  | 64.176  | 56.6   |
| 20    | 7402.840  | 58.933  | 78.4   |
| 21    | 5781.258  | 46.024  | 177.9  |
| 22    | 4756.355  | 37.864  | 40.8   |

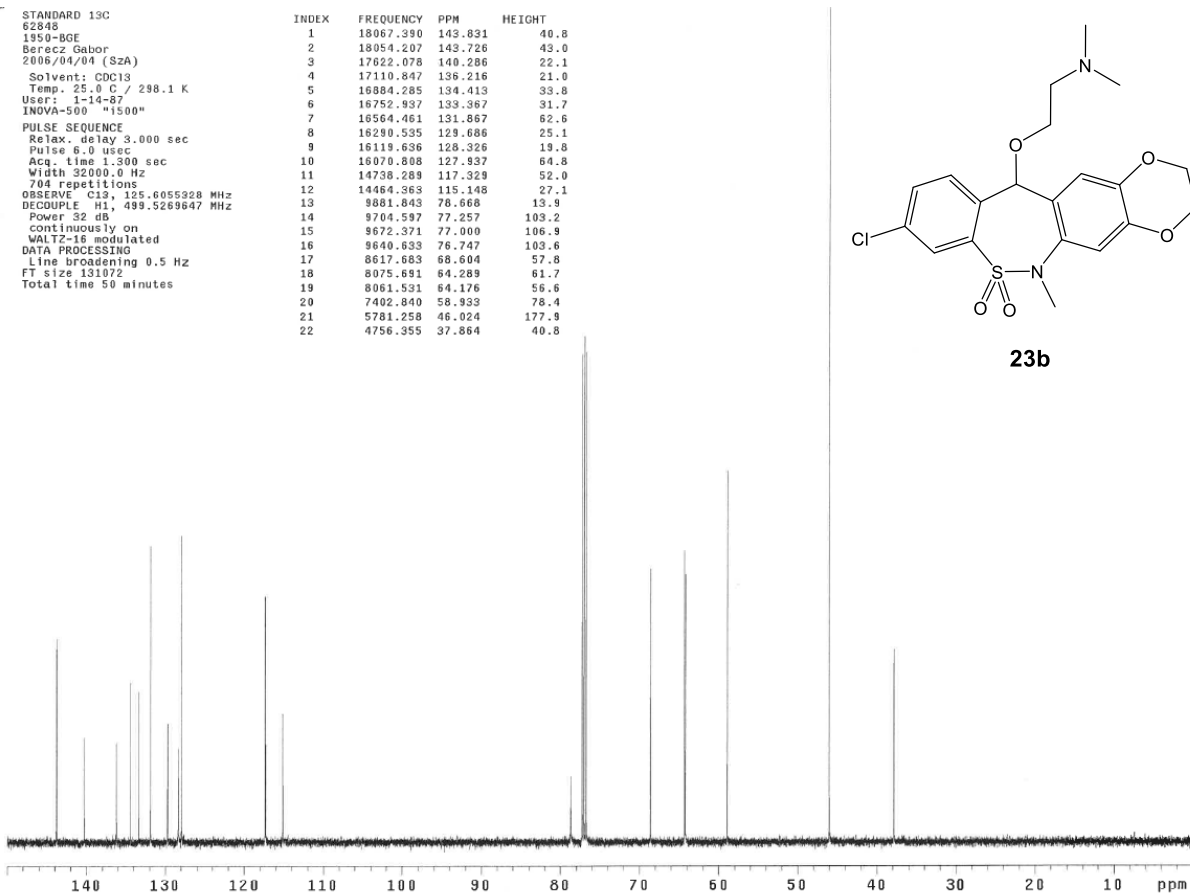

\* STANDARD 1H  
 62848  
 1950-BGE  
 Berecz Gabor  
 2006/04/04 (SZA)  
 Solvent: CDCl3  
 Temp. 25.0 C / 298.1 K  
 INOVA-500 "1500"  
 PULSE SEQUENCE  
 Relax. delay 3.000 sec  
 Pulse 6.4 usec  
 Acq. time 5.000 sec  
 Width 8000.0 Hz  
 16 repetitions  
 OBSERVE H1, 499.5244667 MHz  
 DATA PROCESSING  
 FT size 131072  
 Total time 2 minutes

| INDEX | FREQUENCY PPM | HEIGHT |
|-------|---------------|--------|
| 1     | 3944.336      | 7.896  |
| 2     | 3942.139      | 7.892  |
| 3     | 3818.237      | 7.644  |
| 4     | 3809.814      | 7.627  |
| 5     | 3717.285      | 7.442  |
| 6     | 3715.088      | 7.437  |
| 7     | 3708.862      | 7.425  |
| 8     | 3706.665      | 7.420  |
| 9     | 3680.615      | 7.268  |
| 10    | 3485.718      | 6.978  |
| 11    | 3467.163      | 6.941  |
| 12    | 2846.633      | 5.703  |
| 13    | 2110.474      | 4.225  |
| 14    | 1846.069      | 3.696  |
| 15    | 1842.041      | 3.688  |
| 16    | 1840.210      | 3.684  |
| 17    | 1836.182      | 3.676  |
| 18    | 1830.322      | 3.664  |
| 19    | 1819.336      | 3.642  |
| 20    | 1813.354      | 3.630  |
| 21    | 1809.448      | 3.622  |
| 22    | 1807.373      | 3.618  |
| 23    | 1803.589      | 3.611  |
| 24    | 1701.538      | 3.406  |
| 25    | 1311.401      | 2.625  |
| 26    | 1309.204      | 2.621  |
| 27    | 1305.420      | 2.613  |
| 28    | 1303.345      | 2.609  |
| 29    | 1298.561      | 2.602  |
| 30    | 1297.363      | 2.597  |
| 31    | 1136.719      | 2.276  |
| 32    | 997.070       | 1.996  |
| 33    | 0.000         | 0.000  |

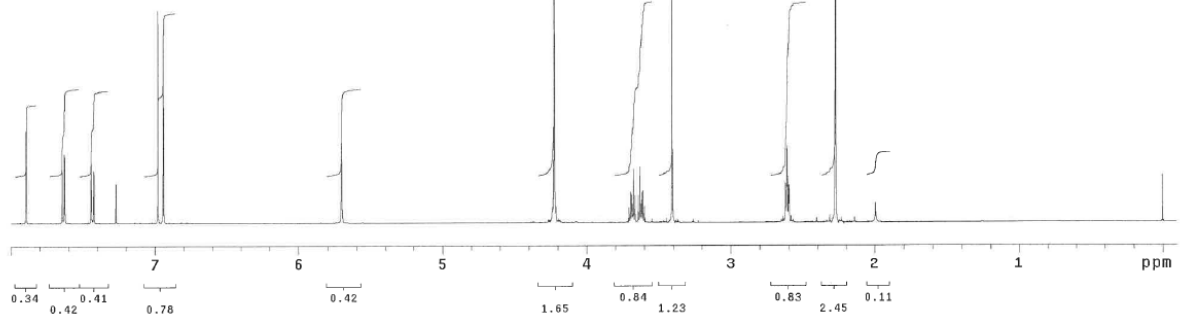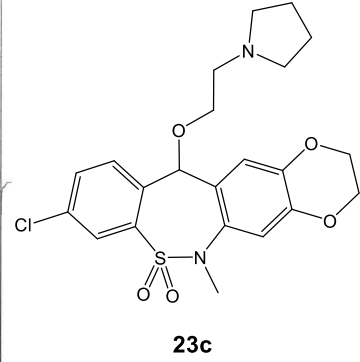

STANDARD 13C  
 62848  
 1950-BGE  
 Berecz Gabor  
 2006/04/04 (SZA)  
 Solvent: CDCl3  
 Temp. 25.0 C / 298.1 K  
 User: 1-14-87  
 INOVA-500 "1500"  
 PULSE SEQUENCE  
 Relax. delay 3.000 sec  
 Pulse 6.0 usec  
 Acq. time 1.300 sec  
 Width 32000.0 Hz  
 704 repetitions  
 OBSERVE C13, 125.605328 MHz  
 DECOUPLE H1, 499.5269647 MHz  
 Power 32 dB  
 continuously on  
 WALTZ-16 modulated  
 DATA PROCESSING  
 Line broadening 0.5 Hz  
 FT size 131072  
 Total time 50 minutes

| INDEX | FREQUENCY PPM | HEIGHT  |
|-------|---------------|---------|
| 1     | 18067.390     | 143.831 |
| 2     | 18054.207     | 143.726 |
| 3     | 17622.078     | 140.286 |
| 4     | 17110.847     | 136.216 |
| 5     | 16384.285     | 134.413 |
| 6     | 16752.937     | 133.367 |
| 7     | 16564.461     | 131.867 |
| 8     | 16290.535     | 129.686 |
| 9     | 16119.636     | 128.326 |
| 10    | 16070.808     | 127.937 |
| 11    | 14738.289     | 117.329 |
| 12    | 14484.363     | 115.148 |
| 13    | 9881.843      | 76.668  |
| 14    | 9764.597      | 77.257  |
| 15    | 8672.371      | 77.000  |
| 16    | 8640.633      | 76.747  |
| 17    | 8617.683      | 68.604  |
| 18    | 8075.691      | 64.289  |
| 19    | 8061.531      | 64.176  |
| 20    | 7402.840      | 58.933  |
| 21    | 5781.258      | 46.024  |
| 22    | 4756.355      | 37.864  |

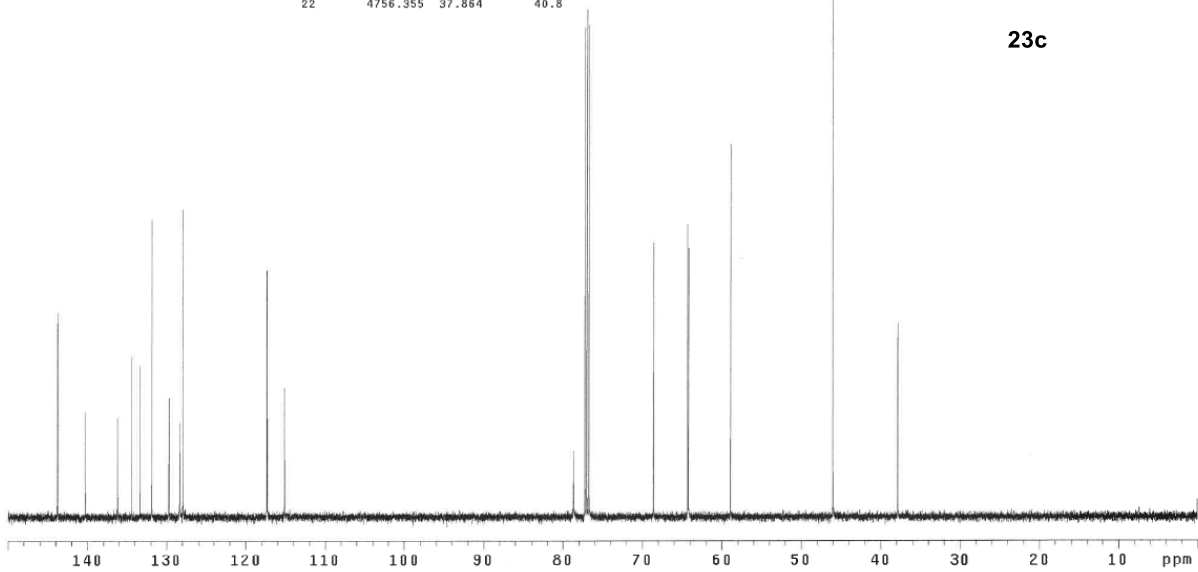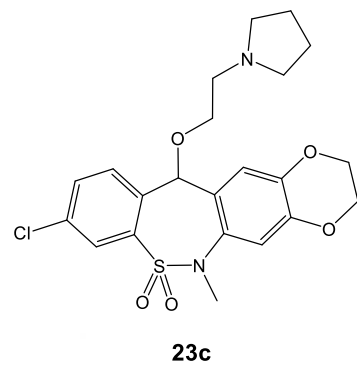

STANDARD 1H  
 1957-BGE  
 Berecz Gabor  
 2006.04.26. (BT)  
 Solvent: CDCl3  
 Temp. 25.0 C / 298.1 K  
 INOVA-500 "1500"  
 PULSE SEQUENCE  
 Relax. delay 3.000 sec  
 Pulse 6.4 usec  
 Acq. time 5.000 sec  
 Width 8000.0 Hz  
 18 repetitions  
 OBSERVE H1, 499.5244656 MHz  
 DATA PROCESSING  
 FT size 131072  
 Total time 2 minutes

| INDEX | FREQUENCY | PPM   | HEIGHT | INDEX | FREQUENCY | PPM   | HEIGHT |
|-------|-----------|-------|--------|-------|-----------|-------|--------|
| 1     | 3943.237  | 7.894 | 29.7   | 40    | 771.606   | 1.545 | 13.3   |
| 2     | 3941.040  | 7.890 | 27.3   | 41    | 717.163   | 1.436 | 14.4   |
| 3     | 3931.177  | 7.670 | 20.6   | 42    | 711.914   | 1.425 | 15.9   |
| 4     | 3922.632  | 7.653 | 23.5   | 43    | 0.000     | 0.000 | 5.8    |
| 5     | 3717.285  | 7.442 | 18.9   |       |           |       |        |
| 6     | 3715.210  | 7.437 | 17.2   |       |           |       |        |
| 7     | 3708.862  | 7.425 | 16.5   |       |           |       |        |
| 8     | 3706.787  | 7.421 | 14.8   |       |           |       |        |
| 9     | 3631.470  | 7.270 | 5.9    |       |           |       |        |
| 10    | 3461.812  | 6.976 | 57.7   |       |           |       |        |
| 11    | 3474.609  | 6.956 | 48.7   |       |           |       |        |
| 12    | 2843.384  | 5.692 | 39.2   |       |           |       |        |
| 13    | 2108.276  | 4.221 | 140.2  |       |           |       |        |
| 14    | 2102.295  | 4.209 | 7.9    |       |           |       |        |
| 15    | 1857.544  | 3.719 | 4.4    |       |           |       |        |
| 16    | 1851.563  | 3.707 | 9.6    |       |           |       |        |
| 17    | 1847.778  | 3.699 | 9.7    |       |           |       |        |
| 18    | 1845.581  | 3.695 | 7.1    |       |           |       |        |
| 19    | 1841.797  | 3.687 | 16.6   |       |           |       |        |
| 20    | 1835.815  | 3.675 | 8.2    |       |           |       |        |
| 21    | 1827.881  | 3.659 | 8.3    |       |           |       |        |
| 22    | 1821.655  | 3.647 | 16.8   |       |           |       |        |
| 23    | 1818.115  | 3.640 | 7.0    |       |           |       |        |
| 24    | 1815.552  | 3.635 | 9.5    |       |           |       |        |
| 25    | 1812.012  | 3.627 | 9.3    |       |           |       |        |
| 26    | 1805.786  | 3.615 | 4.5    |       |           |       |        |
| 27    | 1698.242  | 3.400 | 172.8  |       |           |       |        |
| 28    | 1338.566  | 2.664 | 4.9    |       |           |       |        |
| 29    | 1323.608  | 2.650 | 12.3   |       |           |       |        |
| 30    | 1317.383  | 2.637 | 30.6   |       |           |       |        |
| 31    | 1311.401  | 2.625 | 30.1   |       |           |       |        |
| 32    | 1305.298  | 2.613 | 11.4   |       |           |       |        |
| 33    | 1238.218  | 2.599 | 4.8    |       |           |       |        |
| 34    | 1209.229  | 2.421 | 29.9   |       |           |       |        |
| 35    | 1013.409  | 2.041 | 3.5    |       |           |       |        |
| 36    | 793.945   | 1.589 | 11.7   |       |           |       |        |
| 37    | 788.330   | 1.578 | 30.5   |       |           |       |        |
| 38    | 782.715   | 1.567 | 44.2   |       |           |       |        |
| 39    | 777.100   | 1.556 | 34.9   |       |           |       |        |

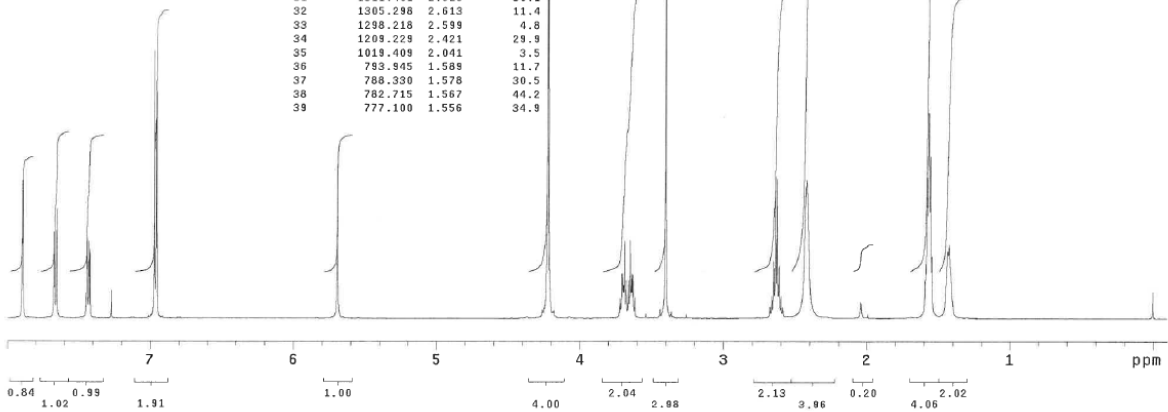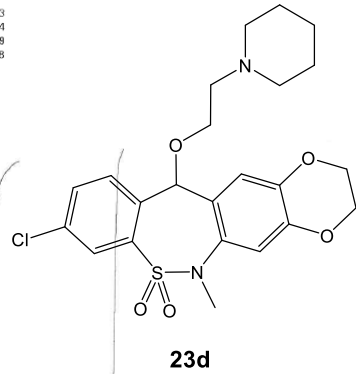

STANDARD 13C  
 63184  
 1957-BGE  
 Berecz Gabor  
 2006.04.26. (BT)  
 Solvent: CDCl3  
 Temp. 25.0 C / 298.1 K  
 User: 1-14-87  
 INOVA-500 "1500"  
 PULSE SEQUENCE  
 Relax. delay 3.000 sec  
 Pulse 6.0 usec  
 Acq. time 1.300 sec  
 Width 32000.0 Hz  
 160 repetitions  
 OBSERVE C13, 125.6055357 MHz  
 DECOUPLE H1, 499.5269647 MHz  
 Power 32 dB  
 continuously on  
 WALTZ-16 modulated  
 DATA PROCESSING  
 Line broadening 0.5 Hz  
 FT size 131072  
 Total time 11 minutes

| INDEX | FREQUENCY | PPM     | HEIGHT |
|-------|-----------|---------|--------|
| 1     | 18062.508 | 143.792 | 33.9   |
| 2     | 18046.883 | 143.668 | 36.5   |
| 3     | 17623.055 | 140.294 | 21.8   |
| 4     | 17114.754 | 136.247 | 22.2   |
| 5     | 16875.984 | 134.347 | 31.0   |
| 6     | 16742.195 | 133.282 | 28.6   |
| 7     | 16558.113 | 131.816 | 59.9   |
| 8     | 16296.883 | 129.737 | 24.3   |
| 9     | 16145.027 | 128.528 | 22.9   |
| 10    | 18061.043 | 127.859 | 61.1   |
| 11    | 14731.453 | 117.274 | 48.4   |
| 12    | 14482.430 | 115.282 | 29.7   |
| 13    | 9885.262  | 78.695  | 15.1   |
| 14    | 9704.109  | 77.253  | 71.4   |
| 15    | 9672.371  | 77.000  | 74.0   |
| 16    | 9640.144  | 76.743  | 72.8   |
| 17    | 8562.508  | 68.165  | 49.2   |
| 18    | 8071.785  | 64.258  | 56.5   |
| 19    | 8059.090  | 64.157  | 54.9   |
| 20    | 7351.082  | 58.521  | 62.3   |
| 21    | 6919.441  | 55.084  | 155.1  |
| 22    | 4769.051  | 37.966  | 38.5   |
| 23    | 3260.262  | 25.954  | 159.1  |
| 24    | 3034.187  | 24.155  | 72.7   |

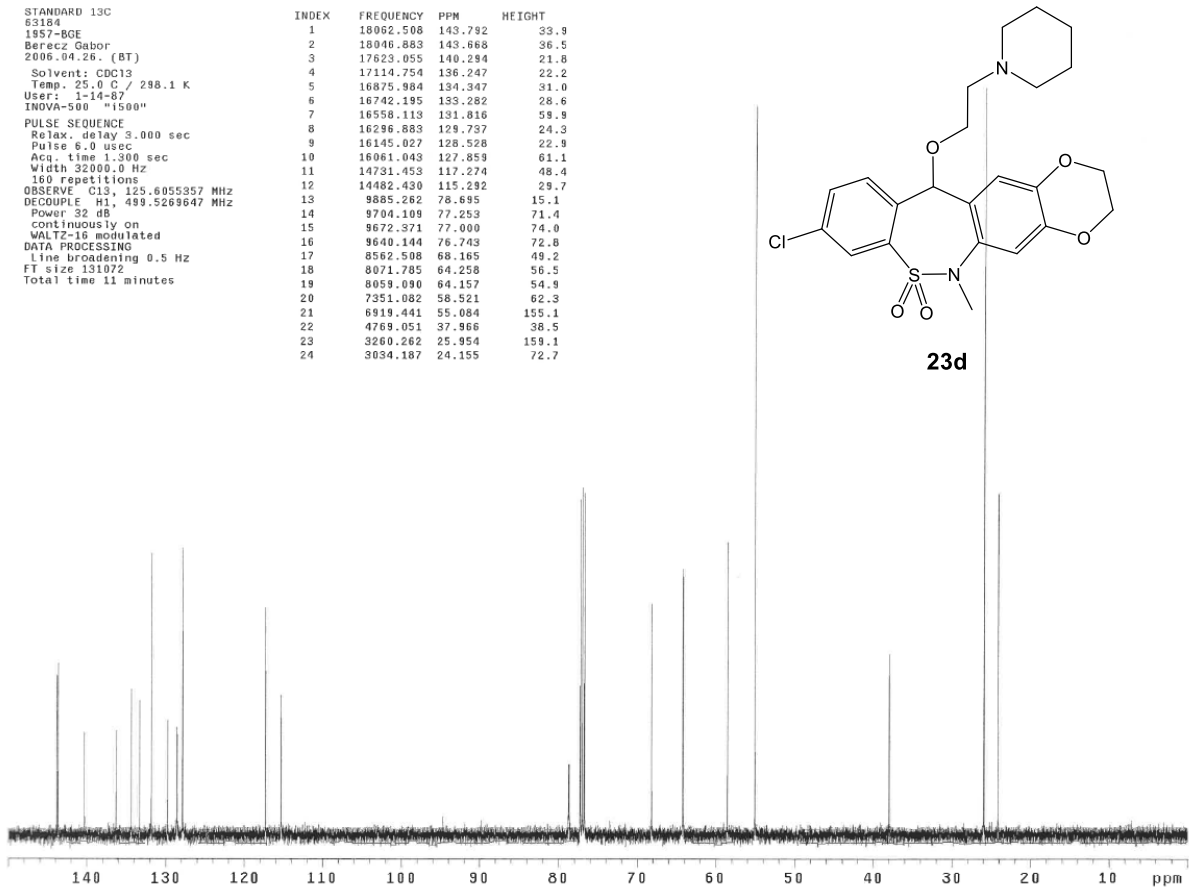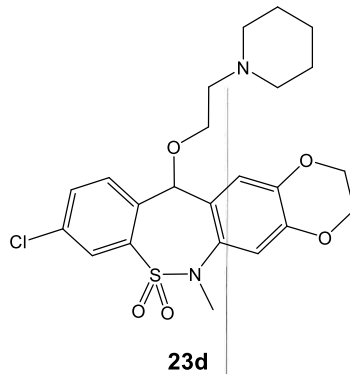

STANDARD 1H  
 52763  
 1949-BGE  
 Berecz Gabor  
 2006.03.29. (CzB)  
 Solvent: CDCl3  
 Temp. 25.0 C / 298.1 K  
 INOVA-500 "1500"  
 PULSE SEQUENCE  
 Relax. delay 1.000 sec  
 Pulse 6.4 usac  
 Acq. time 5.000 sec  
 Width 8000.0 Hz  
 16 repetitions  
 OBSERVE H1, 499.5244634 MHz  
 DATA PROCESSING  
 FT size 131072  
 Total time 1 minutes

| INDEX | FREQUENCY | PPM    | HEIGHT |
|-------|-----------|--------|--------|
| 1     | 3944.824  | 7.897  | 21.2   |
| 2     | 3942.748  | 7.893  | 22.1   |
| 3     | 3827.515  | 7.662  | 16.2   |
| 4     | 3819.092  | 7.645  | 18.7   |
| 5     | 3720.337  | 7.448  | 14.2   |
| 6     | 3718.262  | 7.444  | 14.2   |
| 7     | 3711.914  | 7.431  | 12.3   |
| 8     | 3708.717  | 7.426  | 12.3   |
| 9     | 3633.301  | 7.274  | 5.7    |
| 10    | 3487.793  | 6.982  | 39.0   |
| 11    | 3482.910  | 6.972  | 48.7   |
| 12    | 2848.633  | 5.703  | 25.5   |
| 13    | 2116.089  | 4.236  | 5.1    |
| 14    | 2109.663  | 4.224  | 112.5  |
| 15    | 2103.769  | 4.212  | 5.0    |
| 16    | 1865.723  | 3.735  | 3.8    |
| 17    | 1859.985  | 3.724  | 9.5    |
| 18    | 1856.201  | 3.716  | 39.4   |
| 19    | 1851.440  | 3.706  | 47.2   |
| 20    | 1847.046  | 3.698  | 35.6   |
| 21    | 1835.083  | 3.674  | 6.7    |
| 22    | 1829.346  | 3.662  | 13.4   |
| 23    | 1825.073  | 3.654  | 5.5    |
| 24    | 1823.608  | 3.651  | 7.6    |
| 25    | 1819.458  | 3.642  | 7.3    |
| 26    | 1813.721  | 3.631  | 3.6    |
| 27    | 1696.777  | 3.397  | 151.5  |
| 28    | 1342.041  | 2.687  | 19.2   |
| 29    | 1336.304  | 2.675  | 37.5   |
| 30    | 1330.566  | 2.664  | 17.7   |
| 31    | 1253.662  | 2.510  | 24.8   |
| 32    | 1249.268  | 2.501  | 32.9   |
| 33    | 1244.873  | 2.492  | 23.6   |
| 34    | 995.605   | 1.993  | 9.1    |
| 35    | 946.411   | 1.895  | 2.9    |
| 36    | -0.000    | -0.000 | 6.4    |

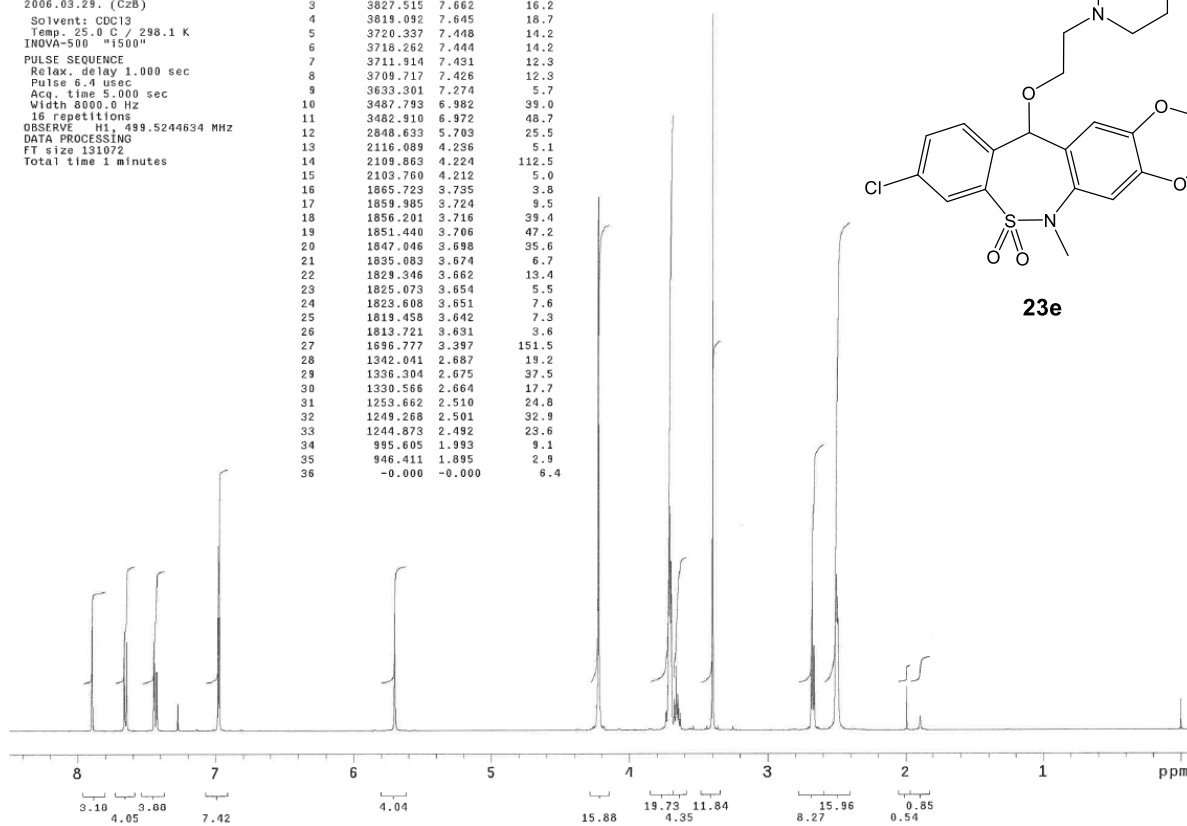

STANDARD 13C  
 52763  
 1949-BGE  
 Berecz Gabor  
 2006.03.29. (CzB)  
 Solvent: CDCl3  
 Temp. 25.0 C / 298.1 K  
 User: 1-14-87  
 INOVA-500 "1500"  
 PULSE SEQUENCE  
 Relax. delay 3.000 sec  
 Pulse 6.0 usac  
 Acq. time 1.300 sec  
 Width 32000.0 Hz  
 368 repetitions  
 OBSERVE C13, 125.6055367 MHz  
 DECOUPLE H1, 499.5244647 MHz  
 Power 32 dB  
 continuously on  
 WALTZ-16 modulated  
 DATA PROCESSING  
 Line broadening 0.5 Hz  
 FT size 131072  
 Total time 26 minutes

| INDEX | FREQUENCY | PPM     | HEIGHT |
|-------|-----------|---------|--------|
| 1     | 18065.926 | 143.820 | 40.1   |
| 2     | 18045.418 | 143.656 | 48.6   |
| 3     | 17608.406 | 140.177 | 23.8   |
| 4     | 17102.059 | 136.146 | 23.9   |
| 5     | 16830.867 | 134.386 | 39.6   |
| 6     | 16712.898 | 133.048 | 37.9   |
| 7     | 16562.020 | 131.847 | 70.5   |
| 8     | 16296.395 | 129.733 | 27.8   |
| 9     | 16110.359 | 128.252 | 23.0   |
| 10    | 16065.926 | 127.898 | 68.4   |
| 11    | 14721.199 | 117.193 | 52.7   |
| 12    | 14459.969 | 115.113 | 31.8   |
| 13    | 9886.707  | 78.547  | 15.7   |
| 14    | 9794.598  | 77.257  | 74.9   |
| 15    | 9672.371  | 77.000  | 79.1   |
| 16    | 9649.633  | 76.747  | 75.7   |
| 17    | 8509.285  | 67.741  | 54.7   |
| 18    | 8398.445  | 66.859  | 145.4  |
| 19    | 8071.297  | 64.254  | 59.4   |
| 20    | 8058.602  | 64.153  | 60.5   |
| 21    | 7508.113  | 58.179  | 73.3   |
| 22    | 6791.023  | 54.062  | 168.9  |
| 23    | 4761.727  | 37.907  | 44.3   |

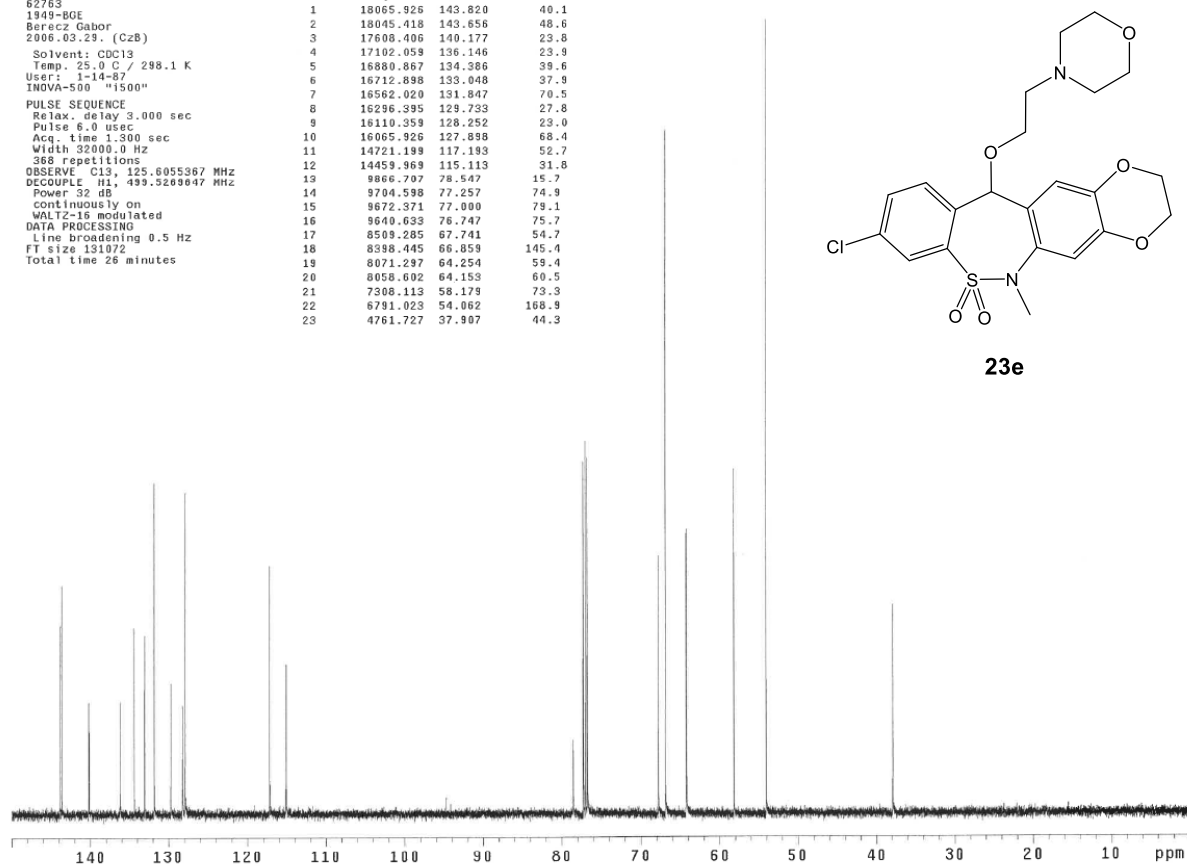



STANDARD 1H  
 63256  
 1960-BGE  
 Berecz Gabor  
 2006.05.03. (CzB)  
 Solvent: CDCl3  
 Temp. 25.0 C / 298.1 K  
 INOVA-500 "1500"  
 PULSE SEQUENCE  
 Relax. delay 1.000 sec  
 Pulse 6.4 usec  
 Acq. time 5.000 sec  
 Width 8000.0 Hz  
 16 repetitions  
 OBSERVE H1, 499.5244696 MHz  
 DATA PROCESSING  
 FT size 131072  
 Total time 1 minutes

| INDEX | FREQUENCY | PPM   | HEIGHT | INDEX | FREQUENCY | PPM    | HEIGHT |
|-------|-----------|-------|--------|-------|-----------|--------|--------|
| 1     | 3964.844  | 7.937 | 20.8   | 40    | 1230.957  | 2.464  | 5.9    |
| 2     | 3962.646  | 7.933 | 20.6   | 41    | 1225.952  | 2.454  | 7.1    |
| 3     | 3703.979  | 7.415 | 12.7   | 42    | 1223.145  | 2.449  | 8.5    |
| 4     | 3701.782  | 7.411 | 12.3   | 43    | 1220.947  | 2.444  | 6.7    |
| 5     | 3695.679  | 7.398 | 18.2   | 44    | 1217.896  | 2.438  | 7.5    |
| 6     | 3693.481  | 7.394 | 18.0   | 45    | 1211.792  | 2.426  | 6.6    |
| 7     | 3655.273  | 7.318 | 25.3   | 46    | 1206.543  | 2.415  | 13.3   |
| 8     | 3646.373  | 7.301 | 18.2   | 47    | 1202.759  | 2.408  | 24.7   |
| 9     | 3628.174  | 7.263 | 23.5   | 48    | 1198.120  | 2.399  | 24.6   |
| 10    | 3492.554  | 6.992 | 48.4   | 49    | 1194.092  | 2.390  | 11.4   |
| 11    | 3373.169  | 6.753 | 48.7   | 50    | 1187.012  | 2.376  | 3.1    |
| 12    | 2470.215  | 4.945 | 30.9   | 51    | 1000.488  | 2.003  | 2.1    |
| 13    | 2133.911  | 4.272 | 3.4    | 52    | 816.895   | 1.635  | 4.5    |
| 14    | 2130.371  | 4.265 | 7.2    | 53    | -0.000    | -0.000 | 23.7   |
| 15    | 2128.438  | 4.261 | 10.6   |       |           |        |        |
| 16    | 2126.587  | 4.257 | 26.0   |       |           |        |        |
| 17    | 2124.512  | 4.253 | 68.4   |       |           |        |        |
| 18    | 2119.263  | 4.243 | 8.4    |       |           |        |        |
| 19    | 2115.112  | 4.234 | 3.5    |       |           |        |        |
| 20    | 2112.915  | 4.230 | 1.9    |       |           |        |        |
| 21    | 1845.703  | 3.695 | 32.9   |       |           |        |        |
| 22    | 1841.064  | 3.686 | 52.1   |       |           |        |        |
| 23    | 1836.304  | 3.676 | 32.4   |       |           |        |        |
| 24    | 1753.540  | 3.510 | 168.5  |       |           |        |        |
| 25    | 1312.378  | 2.627 | 3.3    |       |           |        |        |
| 26    | 1307.495  | 2.617 | 6.5    |       |           |        |        |
| 27    | 1301.270  | 2.605 | 6.3    |       |           |        |        |
| 28    | 1298.950  | 2.600 | 8.2    |       |           |        |        |
| 29    | 1298.875  | 2.596 | 6.3    |       |           |        |        |
| 30    | 1292.358  | 2.587 | 6.3    |       |           |        |        |
| 31    | 1284.546  | 2.572 | 5.7    |       |           |        |        |
| 32    | 1264.404  | 2.531 | 3.3    |       |           |        |        |
| 33    | 1259.083  | 2.520 | 4.3    |       |           |        |        |
| 34    | 1256.470  | 2.515 | 8.2    |       |           |        |        |
| 35    | 1250.977  | 2.504 | 18.7   |       |           |        |        |
| 36    | 1245.972  | 2.494 | 6.6    |       |           |        |        |
| 37    | 1243.530  | 2.489 | 17.3   |       |           |        |        |
| 38    | 1238.892  | 2.480 | 11.5   |       |           |        |        |
| 39    | 1235.718  | 2.474 | 15.0   |       |           |        |        |

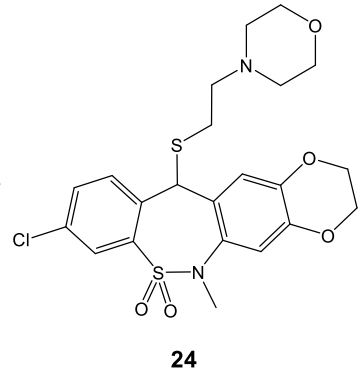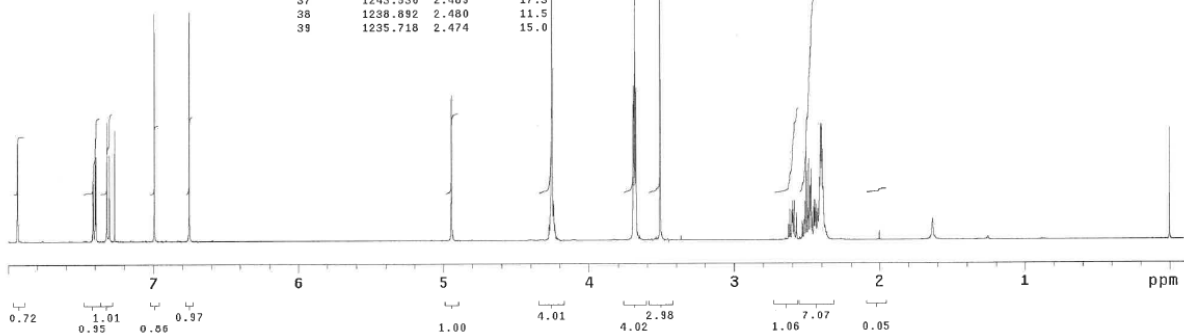

STANDARD 13C  
 63256  
 1960-BGE  
 Berecz Gabor  
 2006.05.03. (CzB)  
 Solvent: CDCl3  
 Temp. 25.0 C / 298.1 K  
 User: 1-14-07  
 INOVA-500 "1500"  
 PULSE SEQUENCE  
 Relax. delay 3.000 sec  
 Pulse 6.0 usec  
 Acq. time 1.300 sec  
 Width 32000.0 Hz  
 14336 repetitions  
 OBSERVE C13, 125.6055293 MHz  
 DECOUPLE H1, 499.5269647 MHz  
 Power 32 dB  
 continuously on  
 WALTZ-16 modulated  
 DATA PROCESSING  
 Line broadening 0.5 Hz  
 FT size 131072  
 Total time 17.1 hours

| INDEX | FREQUENCY | PPM     | HEIGHT |
|-------|-----------|---------|--------|
| 1     | 18128.425 | 144.317 | 29.4   |
| 2     | 17968.757 | 143.046 | 25.2   |
| 3     | 17875.984 | 142.307 | 21.2   |
| 4     | 16911.628 | 134.630 | 26.1   |
| 5     | 16901.863 | 134.553 | 29.6   |
| 6     | 16644.050 | 132.500 | 29.6   |
| 7     | 16566.902 | 131.886 | 22.7   |
| 8     | 16546.394 | 131.723 | 43.0   |
| 9     | 16511.238 | 131.443 | 21.3   |
| 10    | 16052.742 | 127.793 | 40.6   |
| 11    | 14835.456 | 118.102 | 40.4   |
| 12    | 14810.554 | 117.304 | 44.2   |
| 13    | 9704.597  | 77.257  | 171.4  |
| 14    | 9672.371  | 77.000  | 178.2  |
| 15    | 9640.632  | 76.747  | 174.4  |
| 16    | 8393.074  | 66.816  | 90.0   |
| 17    | 8080.574  | 64.328  | 37.7   |
| 18    | 8071.785  | 64.258  | 41.5   |
| 19    | 7313.484  | 58.221  | 56.6   |
| 20    | 6825.891  | 54.338  | 20.8   |
| 21    | 6725.593  | 53.541  | 113.2  |
| 22    | 4942.390  | 38.345  | 37.0   |
| 23    | 3803.230  | 30.277  | 46.5   |

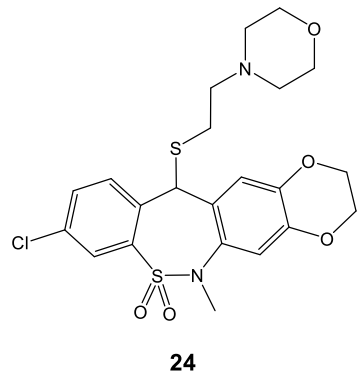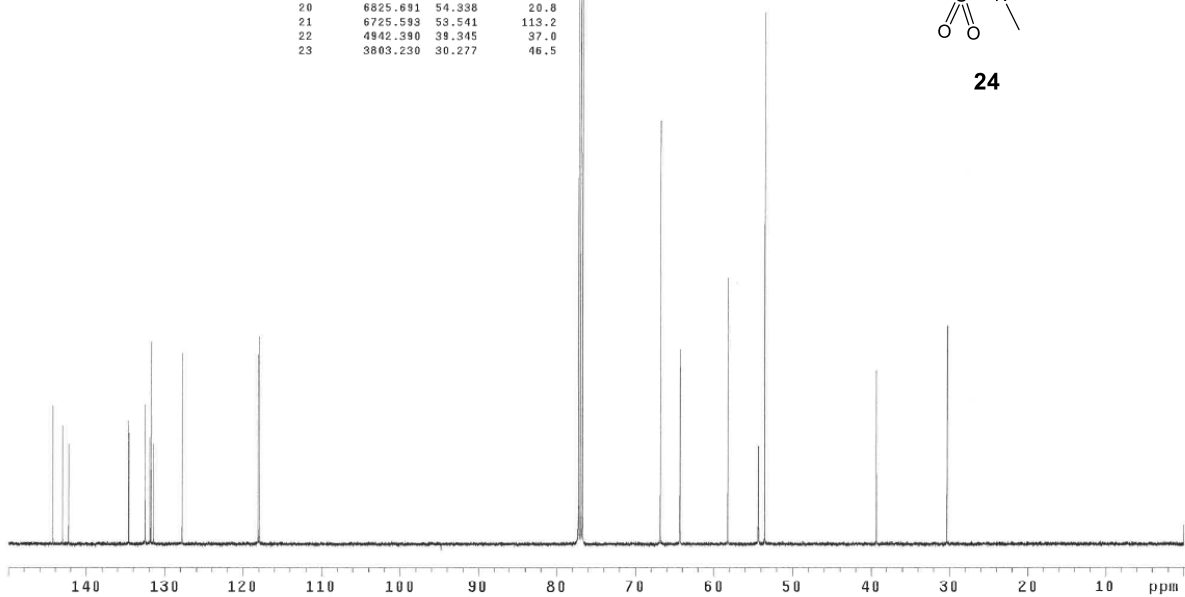

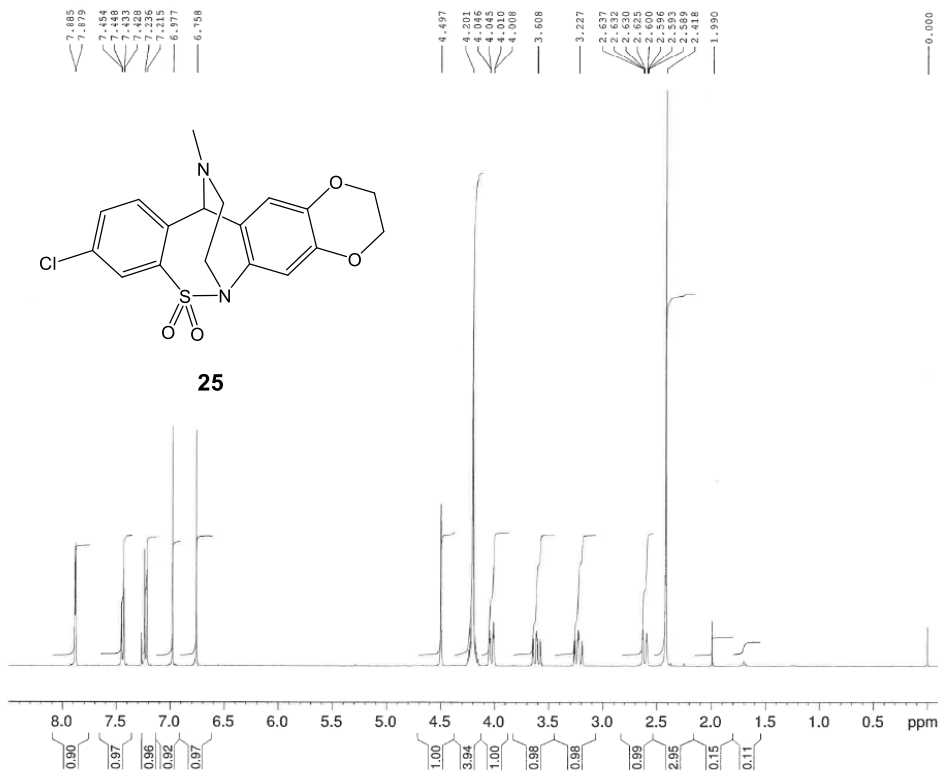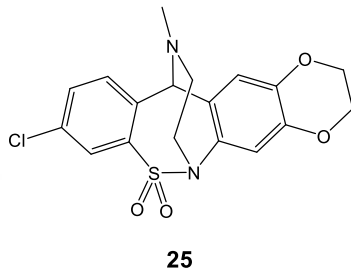

Standard 1H  
85376  
2365-BGE  
Berez Gabor  
2010.03.19. (BB)

```

NAME      85376
EXPNO    1
PROCNO   1
Date_    20100319
Time     11.41
INSTRUM  spect
PROBHD   5 mm PABBO BB-
PULPROG  zg30
TD       65536
SOLVENT  CDCl3
NS       64
DS       2
SWH      8223.685 Hz
FIDRES   0.125483 Hz
AQ       3.9846387 sec
RG       4
DW       60.800 usec
DE       6.50 usec
TE       302.9 K
D1       1.0000000 sec
TD0      1

===== CHANNEL f1 =====
NUC1      1H
P1        12.50 usec
PL1       1.00 dB
PL1W      11.97157383 W
SFO1      400.1324710 MHz
SI        32768
SF        400.1300075 MHz
WDW       no
SSB       0
LB        0.00 Hz
GB        0
PC        1.00

```

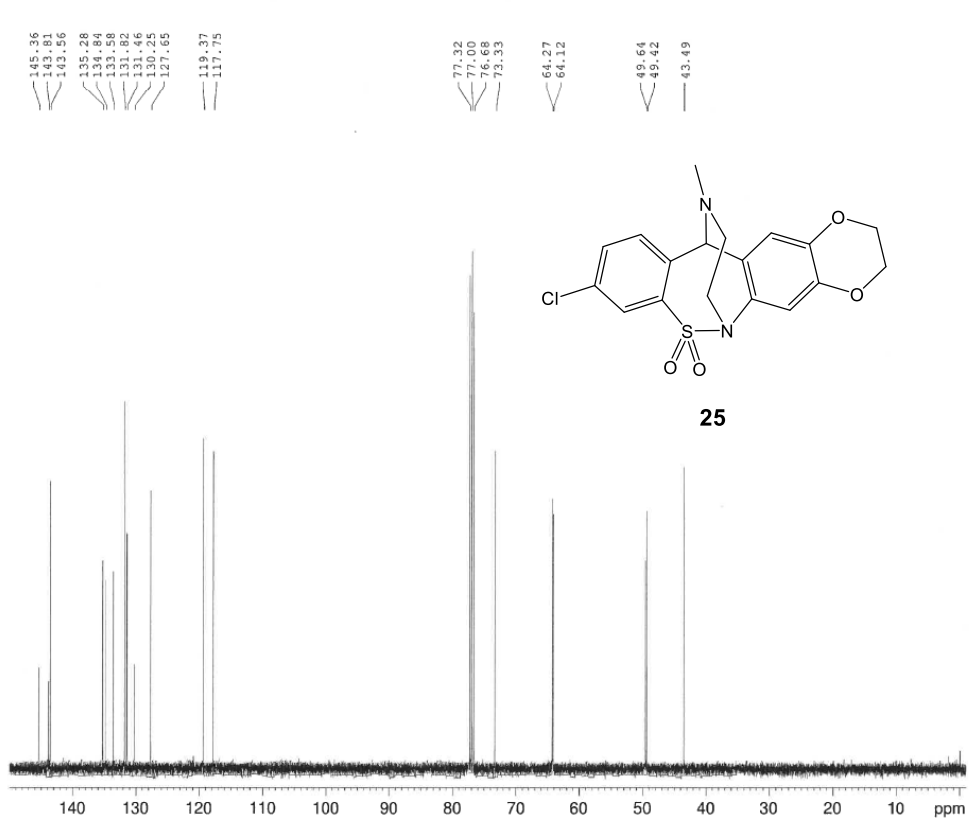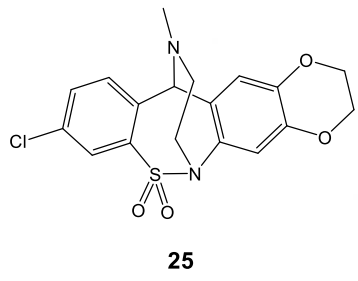

Standard 13C  
85376  
2365-BGE  
Berez Gabor  
2010.03.19. (BB)

```

NAME      85376
EXPNO    2
PROCNO   1
Date_    20100319
Time     11.54
INSTRUM  spect
PROBHD   5 mm PABBO BB-
PULPROG  zgpg30
TD       65536
SOLVENT  CDCl3
NS       257
DS       4
SWH      24038.461 Hz
FIDRES   0.366798 Hz
AQ       1.3631988 sec
RG       1620
DW       20.800 usec
DE       6.50 usec
TE       303.0 K
D1       2.0000000 sec
D11      0.0300000 sec
TD0      1

===== CHANNEL f1 =====
NUC1      13C
P1        9.50 usec
PL1       1.80 dB
PL1W      40.49391937 W
SFO1      100.6228298 MHz

===== CHANNEL f2 =====
CPDPRG2   waltz16
NUC2      1H
PCPD2     90.00 usec
PL2       2.00 dB
PL12      20.00 dB
PL13      20.00 dB
PL1W      9.5035925 W
PL12W     0.15071319 W
PL13W     0.15071319 W
SFO2      400.1316005 MHz
SI        32768
SF        100.6127751 MHz
WDW       no
SSB       0
LB        0.00 Hz
GB        0
PC        1.40

```

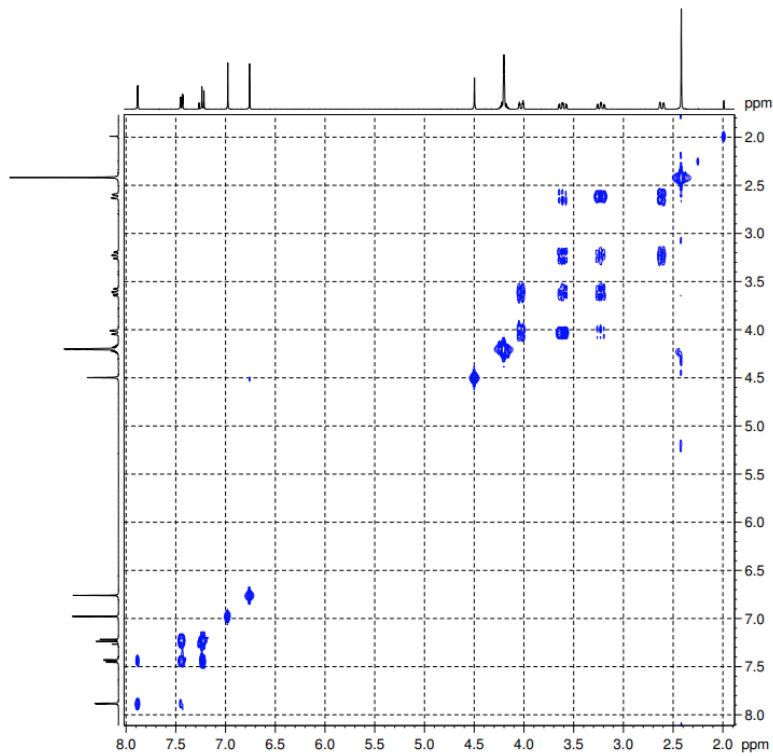

COSY  
85376  
2365-BGE  
Berez Gabor  
2010.03.19. (BB)

```

NAME          85376
EXPNO        3
PROCNO       1
Date_        20100319
Time         12.00
INSTRUM      spect
PROBHD       5 mm PABBO BB-
PULPROG      cosypppf
TD           2048
SOLVENT      CDCl3
NS           1
DS           8
SWH          3401.361 Hz
FIDRES       1.660821 Hz
AQ           0.3011060 sec
RG           36
DM           147.000 usec
DE           6.50 usec
TE           303.0 K
D0           0.0000000 sec
D1           1.0000000 sec
D13          0.0000040 sec
D16          0.0002000 sec
IN0          0.0002940 sec
  
```

```

===== CHANNEL f1 =====
NUC1          1H
P1            12.50 usec
PL1           1.00 dB
PL1W          11.97157383 W
SFO1          400.1317006 MHz
  
```

```

===== GRADIENT CHANNEL =====
GPM1         SINE.100
GP11         10.00 %
P1G          1000.00 usec
ND0          1
TD           128
SFO1         400.1317 MHz
FIDRES       26.571245 Hz
SW           8.500 ppm
FwMODE       QF
SI           1024
SF           400.1300559 MHz
WDW          SINE
SSB          0
LB           0.00 Hz
GB           0
PC           1.40
SI           1024
MC2          QF
SF           400.1300551 MHz
WDW          QSINE
SSB          0
LB           0.00 Hz
GB           0
  
```

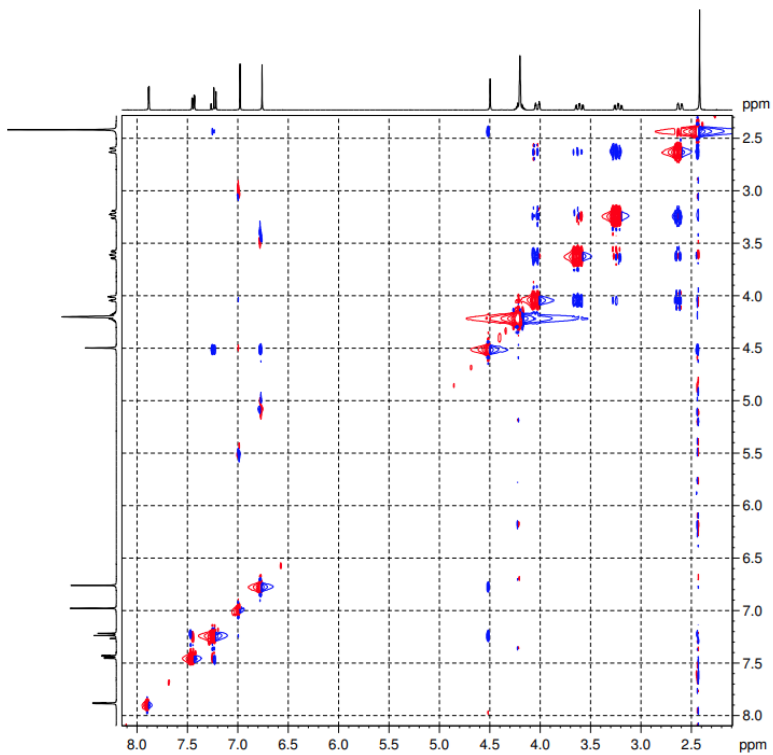

NOESY  
85376  
2365-BGE  
Berez Gabor  
2010.03.19. (BB)

```

NAME          85376
EXPNO        6
PROCNO       1
Date_        20100319
Time         13.43
INSTRUM      spect
PROBHD       5 mm PABBO BB-
PULPROG      noesyph
TD           2048
SOLVENT      CDCl3
NS           4
DS           4
SWH          3401.361 Hz
FIDRES       1.660821 Hz
AQ           0.3011060 sec
RG           64
DM           147.000 usec
DE           6.50 usec
TE           303.0 K
D0           0.0001310 sec
D1           1.0000000 sec
D8           0.30000001 sec
IN0          0.0002940 sec
  
```

```

===== CHANNEL f1 =====
NUC1          1H
P1            12.50 usec
PL1           1.00 dB
PL1W          11.97157383 W
SFO1          400.1317006 MHz
ND0          1
TD           142
SFO1         400.1317 MHz
FIDRES       23.951546 Hz
SW           8.500 ppm
FwMODE       States-TPPI
SI           1024
SF           400.1300000 MHz
WDW          QSINE
SSB          2
LB           0.00 Hz
GB           0
PC           1.00
SI           1024
MC2          States-TPPI
SF           400.1300000 MHz
WDW          QSINE
SSB          2
LB           0.00 Hz
GB           0
  
```

DPFGNOE\_DA (7.88 ppm)  
85376  
2385-B0E  
Berecz Gabor  
2010.03.24. (DA)  
Solvent: CDCl3  
Temp. 30.0 C / 303.1 K  
INOVA-500 "1500"  
PULSE SEQUENCE: dpfgnoe\_da  
Relax. delay 2.000 sec  
Pulse 112.1 degrees  
Mixing 2.000 sec  
Acq. time 5.000 sec  
Width 8000.0 Hz  
128 repetitions  
OBSERVE H1, 499.5244660 MHz  
DATA PROCESSING  
Line broadening 1.0 Hz  
FT size 131072  
Total time 19 minutes

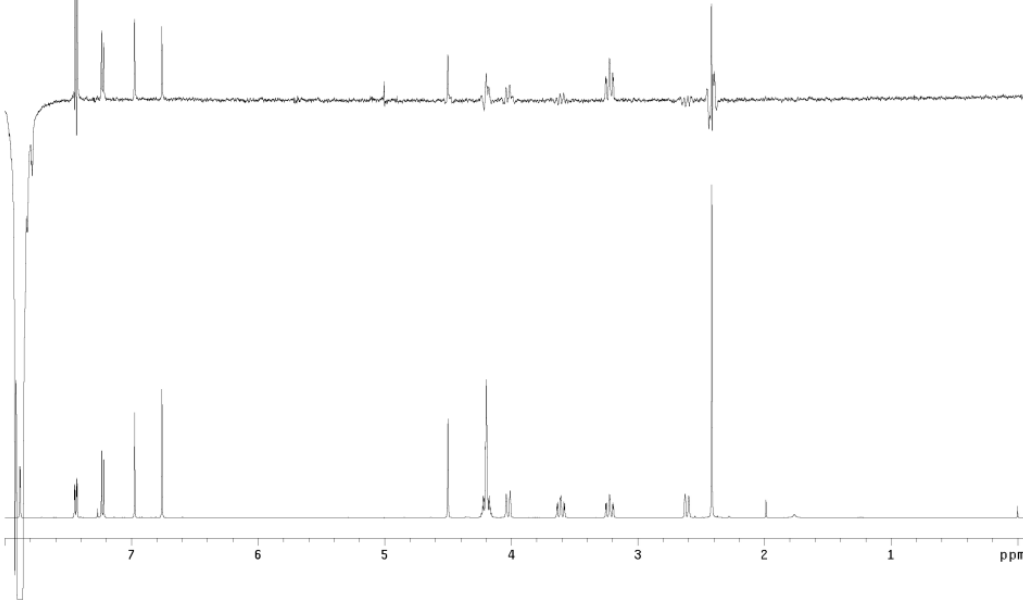

DPFGNOE\_DA (7.23 ppm)  
85376  
2385-B0E  
Berecz Gabor  
2010.03.24. (DA)  
Solvent: CDCl3  
Temp. 30.0 C / 303.1 K  
INOVA-500 "1500"  
PULSE SEQUENCE: dpfgnoe\_da  
Relax. delay 2.000 sec  
Pulse 112.1 degrees  
Mixing 2.000 sec  
Acq. time 5.000 sec  
Width 8000.0 Hz  
128 repetitions  
OBSERVE H1, 499.5244660 MHz  
DATA PROCESSING  
Line broadening 1.0 Hz  
FT size 131072  
Total time 19 minutes

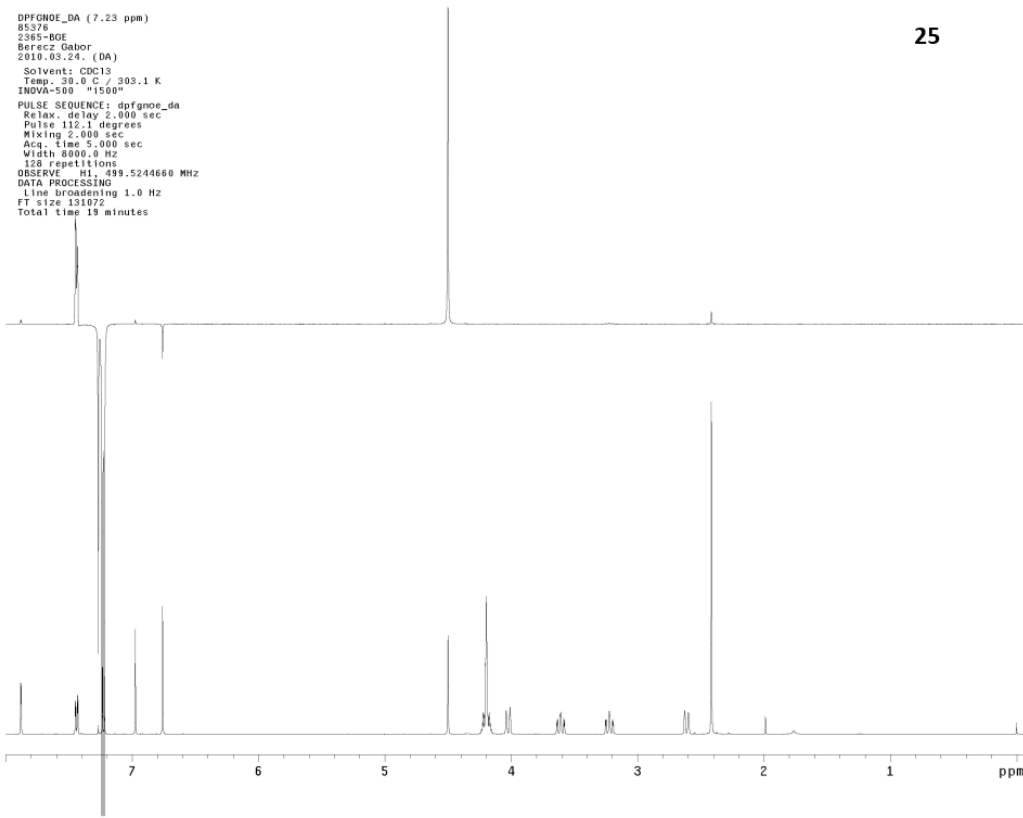

HSQC  
85376  
2365-BGE  
Berez Gabor  
2010.03.19. (BB)

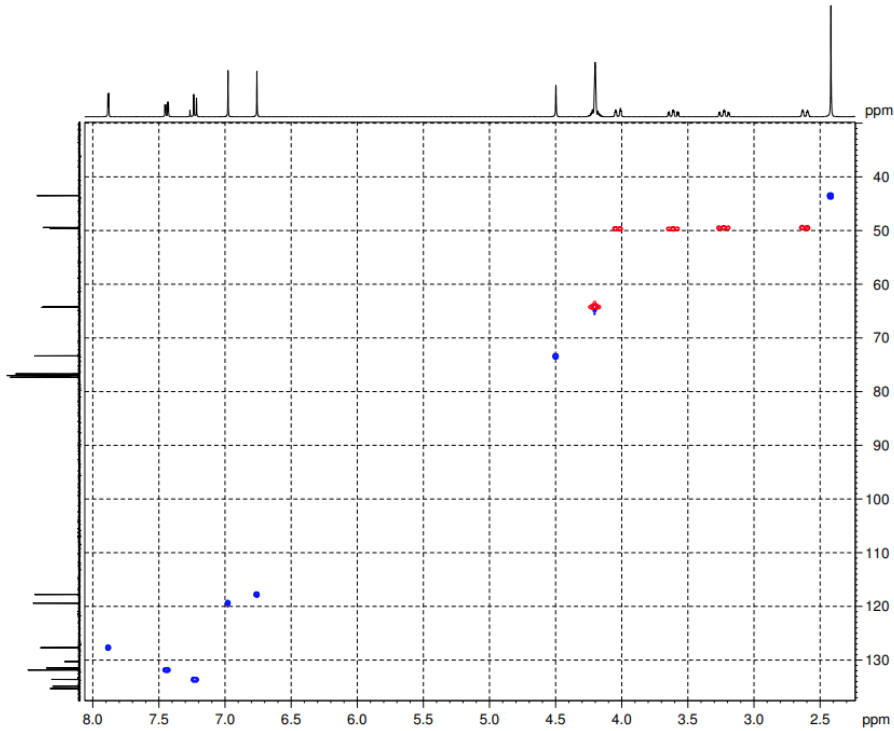

```

NAME      85376
EXPNO    1
PROCNO   1
Date_    20100319
Time     12.14
INSTRUM  spect
PROBHD   5 mm DABBO BB-
PULPROG  zgpg30
TD        65536
SOLVENT  CDCl3
NS        2
DS        16
SWH       3401.361 Hz
FIDRES   0.391350 sec
AQ        2.03
RG        203
DE        147.000 usec
TE        302.2 K
CMSTZ    145.000000 sec
D0        0.0000000 sec
D1        0.0000000 sec
D2        0.00344828 sec
D3        0.00200000 sec
D4        0.00174414 sec
D5        0.00200000 sec
D6        0.00200000 sec
D7        0.00200000 sec
D8        0.00200000 sec
D9        0.00200000 sec
D10       0.00200000 sec
D11       0.00200000 sec
D12       0.00200000 sec
D13       0.00200000 sec
D14       0.00200000 sec
D15       0.00200000 sec
D16       0.00200000 sec
D17       0.00200000 sec
D18       0.00200000 sec
D19       0.00200000 sec
D20       0.00200000 sec
D21       0.00200000 sec
D22       0.00200000 sec
D23       0.00200000 sec
D24       0.00200000 sec
D25       0.00200000 sec
D26       0.00200000 sec
D27       0.00200000 sec
D28       0.00200000 sec
D29       0.00200000 sec
D30       0.00200000 sec
D31       0.00200000 sec
D32       0.00200000 sec
D33       0.00200000 sec
D34       0.00200000 sec
D35       0.00200000 sec
D36       0.00200000 sec
D37       0.00200000 sec
D38       0.00200000 sec
D39       0.00200000 sec
D40       0.00200000 sec
D41       0.00200000 sec
D42       0.00200000 sec
D43       0.00200000 sec
D44       0.00200000 sec
D45       0.00200000 sec
D46       0.00200000 sec
D47       0.00200000 sec
D48       0.00200000 sec
D49       0.00200000 sec
D50       0.00200000 sec
D51       0.00200000 sec
D52       0.00200000 sec
D53       0.00200000 sec
D54       0.00200000 sec
D55       0.00200000 sec
D56       0.00200000 sec
D57       0.00200000 sec
D58       0.00200000 sec
D59       0.00200000 sec
D60       0.00200000 sec
D61       0.00200000 sec
D62       0.00200000 sec
D63       0.00200000 sec
D64       0.00200000 sec
D65       0.00200000 sec
D66       0.00200000 sec
D67       0.00200000 sec
D68       0.00200000 sec
D69       0.00200000 sec
D70       0.00200000 sec
D71       0.00200000 sec
D72       0.00200000 sec
D73       0.00200000 sec
D74       0.00200000 sec
D75       0.00200000 sec
D76       0.00200000 sec
D77       0.00200000 sec
D78       0.00200000 sec
D79       0.00200000 sec
D80       0.00200000 sec
D81       0.00200000 sec
D82       0.00200000 sec
D83       0.00200000 sec
D84       0.00200000 sec
D85       0.00200000 sec
D86       0.00200000 sec
D87       0.00200000 sec
D88       0.00200000 sec
D89       0.00200000 sec
D90       0.00200000 sec
D91       0.00200000 sec
D92       0.00200000 sec
D93       0.00200000 sec
D94       0.00200000 sec
D95       0.00200000 sec
D96       0.00200000 sec
D97       0.00200000 sec
D98       0.00200000 sec
D99       0.00200000 sec
D100      0.00200000 sec
  
```

HMBC  
85376  
2365-BGE  
Berez Gabor  
2010.03.19. (BB)

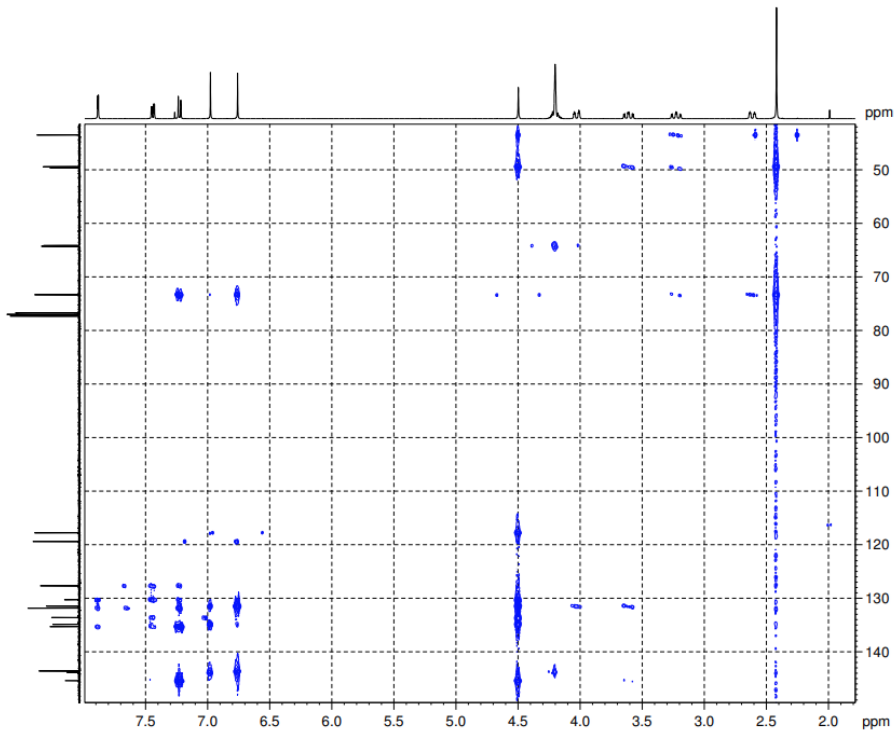

```

NAME      85376
EXPNO    1
PROCNO   1
Date_    20100319
Time     12.14
INSTRUM  spect
PROBHD   5 mm DABBO BB-
PULPROG  zgpg30
TD        65536
SOLVENT  CDCl3
NS        2
DS        16
SWH       3401.361 Hz
FIDRES   0.391350 sec
AQ        2.03
RG        203
DE        147.000 usec
TE        302.2 K
CMSTZ    145.000000 sec
D0        0.0000000 sec
D1        0.0000000 sec
D2        0.00344828 sec
D3        0.00200000 sec
D4        0.00174414 sec
D5        0.00200000 sec
D6        0.00200000 sec
D7        0.00200000 sec
D8        0.00200000 sec
D9        0.00200000 sec
D10       0.00200000 sec
D11       0.00200000 sec
D12       0.00200000 sec
D13       0.00200000 sec
D14       0.00200000 sec
D15       0.00200000 sec
D16       0.00200000 sec
D17       0.00200000 sec
D18       0.00200000 sec
D19       0.00200000 sec
D20       0.00200000 sec
D21       0.00200000 sec
D22       0.00200000 sec
D23       0.00200000 sec
D24       0.00200000 sec
D25       0.00200000 sec
D26       0.00200000 sec
D27       0.00200000 sec
D28       0.00200000 sec
D29       0.00200000 sec
D30       0.00200000 sec
D31       0.00200000 sec
D32       0.00200000 sec
D33       0.00200000 sec
D34       0.00200000 sec
D35       0.00200000 sec
D36       0.00200000 sec
D37       0.00200000 sec
D38       0.00200000 sec
D39       0.00200000 sec
D40       0.00200000 sec
D41       0.00200000 sec
D42       0.00200000 sec
D43       0.00200000 sec
D44       0.00200000 sec
D45       0.00200000 sec
D46       0.00200000 sec
D47       0.00200000 sec
D48       0.00200000 sec
D49       0.00200000 sec
D50       0.00200000 sec
D51       0.00200000 sec
D52       0.00200000 sec
D53       0.00200000 sec
D54       0.00200000 sec
D55       0.00200000 sec
D56       0.00200000 sec
D57       0.00200000 sec
D58       0.00200000 sec
D59       0.00200000 sec
D60       0.00200000 sec
D61       0.00200000 sec
D62       0.00200000 sec
D63       0.00200000 sec
D64       0.00200000 sec
D65       0.00200000 sec
D66       0.00200000 sec
D67       0.00200000 sec
D68       0.00200000 sec
D69       0.00200000 sec
D70       0.00200000 sec
D71       0.00200000 sec
D72       0.00200000 sec
D73       0.00200000 sec
D74       0.00200000 sec
D75       0.00200000 sec
D76       0.00200000 sec
D77       0.00200000 sec
D78       0.00200000 sec
D79       0.00200000 sec
D80       0.00200000 sec
D81       0.00200000 sec
D82       0.00200000 sec
D83       0.00200000 sec
D84       0.00200000 sec
D85       0.00200000 sec
D86       0.00200000 sec
D87       0.00200000 sec
D88       0.00200000 sec
D89       0.00200000 sec
D90       0.00200000 sec
D91       0.00200000 sec
D92       0.00200000 sec
D93       0.00200000 sec
D94       0.00200000 sec
D95       0.00200000 sec
D96       0.00200000 sec
D97       0.00200000 sec
D98       0.00200000 sec
D99       0.00200000 sec
D100      0.00200000 sec
  
```

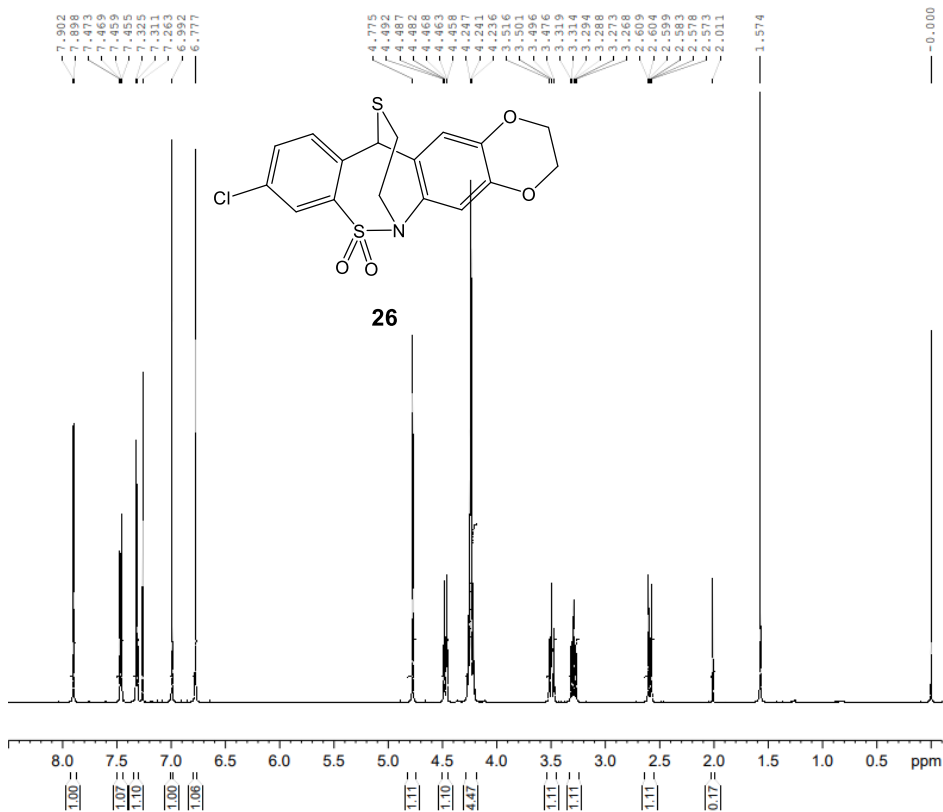

Standard 1H  
143465  
BEG0701 1B  
Berez Gabor  
2024.09.06. (KP)

Current Data Parameters  
NAME 143465  
EXPNO 11  
PROCNO 1

F2 - Acquisition Parameters  
Date\_ 20240906  
Time 15.41 h  
INSTRUM spect  
PROBHD 2145856\_0002 (  
PULPROG zg30  
TD 65536  
SOLVENT CDC13  
NS 16  
DS 2  
SWH 12019.230 Hz  
FIDRES 0.366798 Hz  
AQ 2.7262976 sec  
RG 196.07  
DW 41.600 usec  
DE 25.00 usec  
TE 295.0 K  
D1 1.00000000 sec  
TDO 1  
SFO1 600.0037050 MHz  
NUC1 1H  
P1 11.50 usec  
PLW1 28.00000000 W

F2 - Processing parameters  
SI 65536  
SF 600.0000132 MHz  
WDW EM  
SSB 0  
LB 0.30 Hz  
GB 0  
PC 1.00

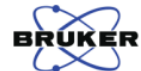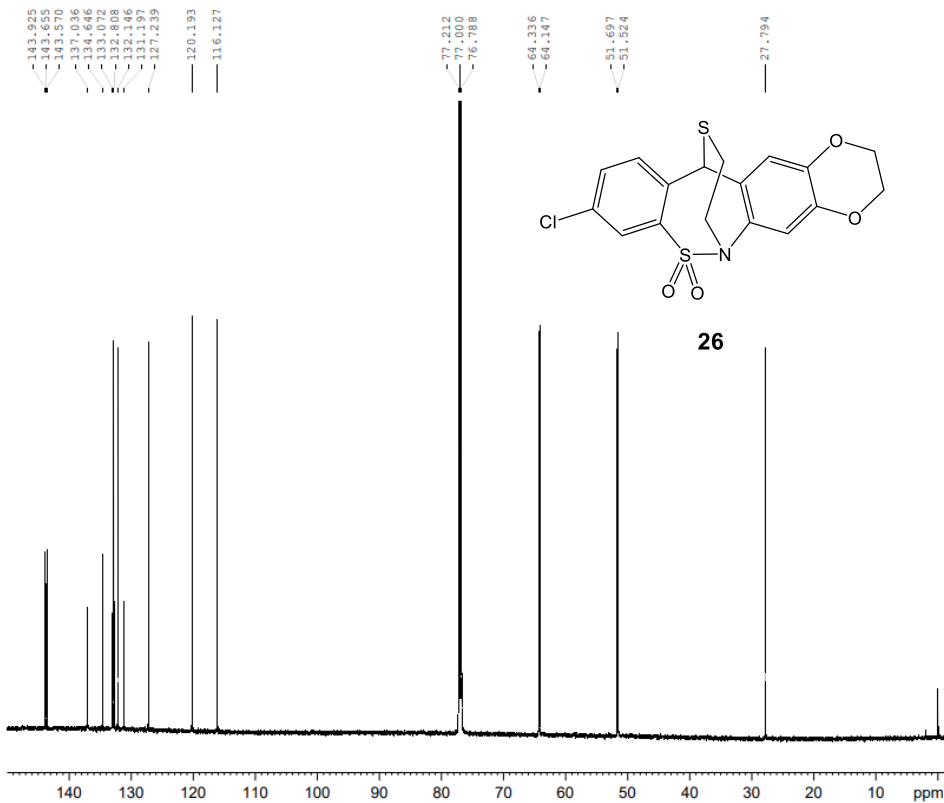

Standard 13C  
143465  
BEG0701 1B  
Berez Gabor  
2024.09.06. (KP)

Current Data Parameters  
NAME 143465  
EXPNO 12  
PROCNO 1

F2 - Acquisition Parameters  
Date\_ 20240906  
Time 16.50 h  
INSTRUM spect  
PROBHD 2145856\_0002 (  
PULPROG zgpg30  
TD 65536  
SOLVENT CDC13  
NS 2048  
DS 4  
SWH 36231.883 Hz  
FIDRES 1.105709 Hz  
AQ 0.9043968 sec  
RG 196.07  
DW 13.800 usec  
DE 18.00 usec  
TE 295.0 K  
D1 1.00000000 sec  
D11 0.03000000 sec  
TDO 1  
SFO1 150.8852070 MHz  
NUC1 13C  
P1 9.90 usec  
PLW1 71.00000000 W  
SFO2 600.0024000 MHz  
NUC2 1H  
CPDPRG2 waltz16  
PCPD2 80.00 usec  
PLW2 32.90000153 W  
PLW12 0.70370001 W  
PLW13 0.35339001 W

F2 - Processing parameters  
SI 131072  
SF 150.8701274 MHz  
WDW EM  
SSB 0  
LB 1.00 Hz  
GB 0  
PC 1.40

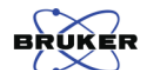

COSY  
143465  
BEG0701\_1B  
Berez Gabor  
2024.09.06. (KP)

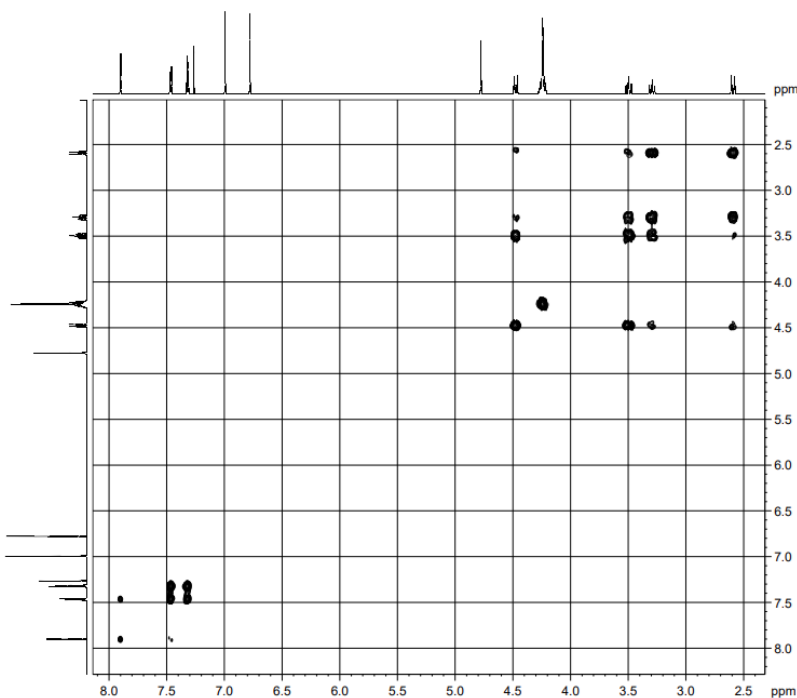

```
Current Data Parameters
NAME      143465
EXPNO    1
PROCNO   1

F2 - Acquisition Parameters
Date_     20240906
Time     16.51 h
INSTRUM  spect
PROBHD   zgpg30
PULPROG  zgpg30
TD        65536
SOLVENT  CDCl3
NS        8
DS        4
SWH       7812.500 Hz
FIDRES   0.1116720 Hz
AQ        1.9600000 sec
RG         64.000 usec
DE         25.00 usec
TE         300.2 K
CQ        0.0000000 sec
DQ        2.0000000 sec
DL        0.0018074 sec
DLEA     0.0000000 sec
DLSA     0.0018074 sec
DMSA     0.0000000 sec
DMSV     600.0036000 MHz
DSCA     11.20 usec
F1        28.0000000 W
SFO1[1]  500Q11.100
SFO1[2]  500Q11.100
SFO1[3]  500Q11.100
SFO2     40.0000000 W
P1        1000.00 usec

F1 - Acquisition parameters
TD        256
SFO1     600.0036000 MHz
FIDRES   0.1116720 Hz
AQ        1.9600000 sec
RG         64.000 usec
DE         25.00 usec
TE         300.2 K
CQ        0.0000000 sec
DQ        2.0000000 sec
DL        0.0018074 sec
DLEA     0.0000000 sec
DLSA     0.0018074 sec
DMSA     0.0000000 sec
DMSV     600.0036000 MHz
DSCA     11.20 usec
F1        28.0000000 W
SFO1[1]  500Q11.100
SFO1[2]  500Q11.100
SFO1[3]  500Q11.100
SFO2     40.0000000 W
P1        1000.00 usec

F2 - Processing parameters
SI        32768
SF        600.0036132 MHz
WDW       0
SSB       0 Hz
GB        0
PC        1.40

F1 - Processing parameters
SI        32768
SF        600.0036132 MHz
WDW       0
SSB       0 Hz
GB        0
PC        1.40
```

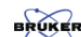

HSQC (140Hz)  
143465  
BEG0701\_1B  
Berez Gabor  
2024.09.06. (KP)

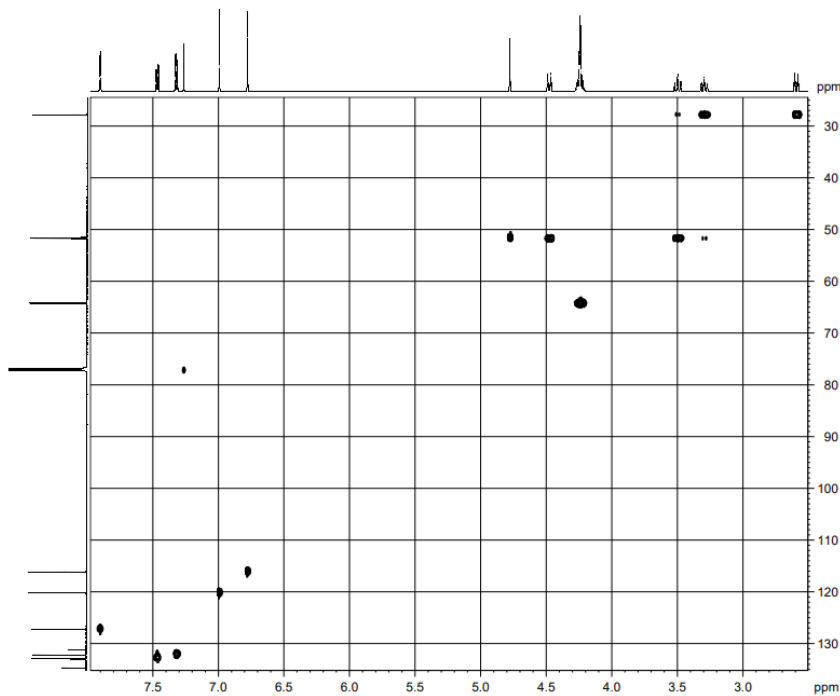

```
Current Data Parameters
NAME      143465
EXPNO    14
PROCNO   1

F2 - Acquisition Parameters
Date_     20240906
Time     17.17 h
INSTRUM  spect
PROBHD   zgpg30
PULPROG  zgpg30
TD        65536
SOLVENT  CDCl3
NS        8
DS        4
SWH       7812.500 Hz
FIDRES   0.1116720 Hz
AQ        1.9600000 sec
RG         64.000 usec
DE         25.00 usec
TE         300.2 K
CQ        0.0000000 sec
DQ        2.0000000 sec
DL        0.0018074 sec
DLEA     0.0000000 sec
DLSA     0.0018074 sec
DMSA     0.0000000 sec
DMSV     600.0036000 MHz
DSCA     11.20 usec
F1        28.0000000 W
SFO1[1]  500Q11.100
SFO1[2]  500Q11.100
SFO1[3]  500Q11.100
SFO2     40.0000000 W
P1        1000.00 usec

F1 - Acquisition parameters
TD        256
SFO1     600.0036000 MHz
FIDRES   0.1116720 Hz
AQ        1.9600000 sec
RG         64.000 usec
DE         25.00 usec
TE         300.2 K
CQ        0.0000000 sec
DQ        2.0000000 sec
DL        0.0018074 sec
DLEA     0.0000000 sec
DLSA     0.0018074 sec
DMSA     0.0000000 sec
DMSV     600.0036000 MHz
DSCA     11.20 usec
F1        28.0000000 W
SFO1[1]  500Q11.100
SFO1[2]  500Q11.100
SFO1[3]  500Q11.100
SFO2     40.0000000 W
P1        1000.00 usec

F2 - Processing parameters
SI        32768
SF        600.0036132 MHz
WDW       0
SSB       0 Hz
GB        0
PC        1.40

F1 - Processing parameters
SI        32768
SF        600.0036132 MHz
WDW       0
SSB       0 Hz
GB        0
PC        1.40
```

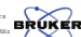

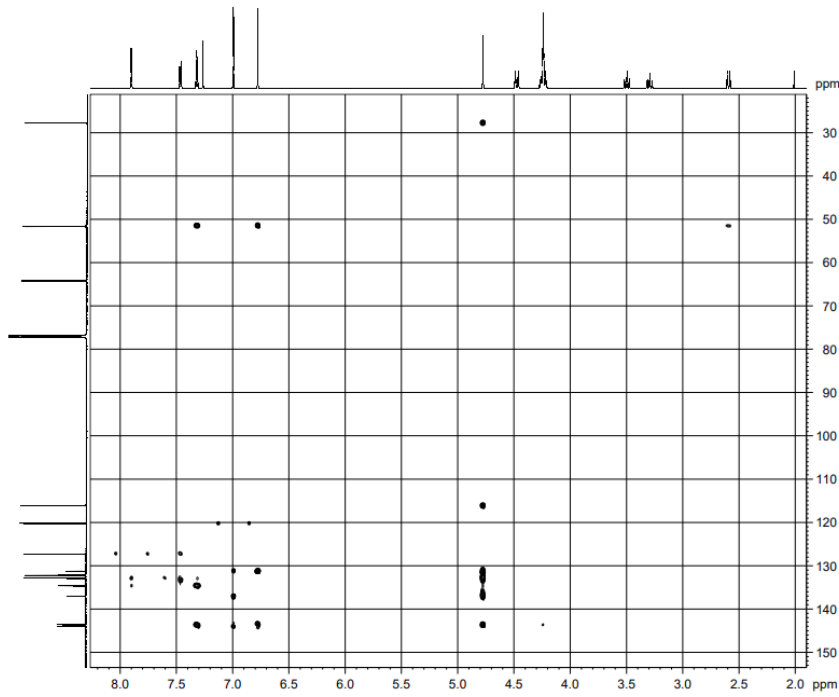

```

Current Data Parameters
NAME      143465
EXPNO    1
PROCNO   1

F2 - Acquisition Parameters
Date_     20240906
Time     17.42 h
INSTRUM  spect
PROBHD   zgpg30 5mm
PULPROG  zgpg30
TD        65536
SOLVENT  DMSO-d6
NS        16
DS        4
SWH       7812.150 Hz
FIDRES    7.628390 Hz
AQ        0.115375 sec
RG        196.00
SR        655.000 usec
DE        23.00 usec
TE        300.2 K

CROSSP   140.000000
CROSS2   0.000000
CROSS3   0.000000
CROSS4   1.000000 usec
CROSS5   0.000000 usec
CROSS6   0.000000 usec
CROSS7   0.000000 usec
CROSS8   0.000000 usec
CROSS9   0.000000 usec
CROSS10  0.000000 usec
CROSS11  0.000000 usec
CROSS12  0.000000 usec
CROSS13  0.000000 usec
CROSS14  0.000000 usec
CROSS15  0.000000 usec
CROSS16  0.000000 usec
CROSS17  0.000000 usec
CROSS18  0.000000 usec
CROSS19  0.000000 usec
CROSS20  0.000000 usec
CROSS21  0.000000 usec
CROSS22  0.000000 usec
CROSS23  0.000000 usec
CROSS24  0.000000 usec
CROSS25  0.000000 usec
CROSS26  0.000000 usec
CROSS27  0.000000 usec
CROSS28  0.000000 usec
CROSS29  0.000000 usec
CROSS30  0.000000 usec
CROSS31  0.000000 usec
CROSS32  0.000000 usec
CROSS33  0.000000 usec
CROSS34  0.000000 usec
CROSS35  0.000000 usec
CROSS36  0.000000 usec
CROSS37  0.000000 usec
CROSS38  0.000000 usec
CROSS39  0.000000 usec
CROSS40  0.000000 usec
CROSS41  0.000000 usec
CROSS42  0.000000 usec
CROSS43  0.000000 usec
CROSS44  0.000000 usec
CROSS45  0.000000 usec
CROSS46  0.000000 usec
CROSS47  0.000000 usec
CROSS48  0.000000 usec
CROSS49  0.000000 usec
CROSS50  0.000000 usec
CROSS51  0.000000 usec
CROSS52  0.000000 usec
CROSS53  0.000000 usec
CROSS54  0.000000 usec
CROSS55  0.000000 usec
CROSS56  0.000000 usec
CROSS57  0.000000 usec
CROSS58  0.000000 usec
CROSS59  0.000000 usec
CROSS60  0.000000 usec
CROSS61  0.000000 usec
CROSS62  0.000000 usec
CROSS63  0.000000 usec
CROSS64  0.000000 usec
CROSS65  0.000000 usec
CROSS66  0.000000 usec
CROSS67  0.000000 usec
CROSS68  0.000000 usec
CROSS69  0.000000 usec
CROSS70  0.000000 usec
CROSS71  0.000000 usec
CROSS72  0.000000 usec
CROSS73  0.000000 usec
CROSS74  0.000000 usec
CROSS75  0.000000 usec
CROSS76  0.000000 usec
CROSS77  0.000000 usec
CROSS78  0.000000 usec
CROSS79  0.000000 usec
CROSS80  0.000000 usec
CROSS81  0.000000 usec
CROSS82  0.000000 usec
CROSS83  0.000000 usec
CROSS84  0.000000 usec
CROSS85  0.000000 usec
CROSS86  0.000000 usec
CROSS87  0.000000 usec
CROSS88  0.000000 usec
CROSS89  0.000000 usec
CROSS90  0.000000 usec
CROSS91  0.000000 usec
CROSS92  0.000000 usec
CROSS93  0.000000 usec
CROSS94  0.000000 usec
CROSS95  0.000000 usec
CROSS96  0.000000 usec
CROSS97  0.000000 usec
CROSS98  0.000000 usec
CROSS99  0.000000 usec
CROSS100 0.000000 usec

F1 - Acquisition parameters
TD        65536
SF        100.626120 MHz
WDW       EM
SSB       0
LB        0 Hz
GB        0
PC        1.40

F2 - Processing parameters
SI        32768
SF        100.626120 MHz
WDW       EM
SSB       0
LB        0 Hz
GB        0
PC        1.40

F1 - Processing parameters
SI        32768
SF        100.626120 MHz
WDW       EM
SSB       0
LB        0 Hz
GB        0
PC        1.40
  
```

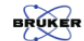



STANDARD 1H  
74867  
2180-BGE  
Bercsz Gabor  
2008.06.24. (BB)  
Solvent: CDCl3  
Temp. 30.0 C / 303.1 K  
INOVA-500 "1500"  
PULSE SEQUENCE  
Relax. delay 1.000 sec  
Pulse 90.0 degrees  
Acq. time 5.000 sec  
Width 8000.0 Hz  
16 repetitions  
OBSERVE H1, 499.5240596 MHz  
DATA PROCESSING  
FT size 131072  
Total time 1 minutes

| INDEX | FREQUENCY PPM | HEIGHT | INDEX | FREQUENCY PPM | HEIGHT   |        |      |
|-------|---------------|--------|-------|---------------|----------|--------|------|
| 1     | 3939.697      | 7.887  | 53.3  | 40            | 1869.141 | 3.742  | 18.6 |
| 2     | 3937.622      | 7.883  | 51.2  | 41            | 1862.427 | 3.728  | 15.0 |
| 3     | 3735.474      | 7.478  | 37.8  | 42            | 1858.867 | 3.721  | 32.4 |
| 4     | 3733.276      | 7.474  | 36.1  | 43            | 1855.347 | 3.714  | 15.3 |
| 5     | 3727.173      | 7.461  | 49.0  | 44            | 1789.795 | 3.583  | 17.1 |
| 6     | 3724.976      | 7.457  | 46.6  | 45            | 1786.011 | 3.575  | 17.7 |
| 7     | 3664.673      | 7.336  | 77.2  | 46            | 1779.541 | 3.562  | 17.7 |
| 8     | 3660.645      | 7.328  | 2.1   | 47            | 1775.757 | 3.555  | 24.1 |
| 9     | 3656.494      | 7.320  | 62.1  | 48            | 1771.464 | 3.546  | 16.1 |
| 10    | 3626.709      | 7.260  | 18.6  | 49            | 1764.893 | 3.533  | 16.7 |
| 11    | 3512.085      | 7.031  | 112.5 | 50            | 1761.353 | 3.526  | 13.4 |
| 12    | 3402.710      | 6.812  | 145.9 | 51            | 995.605  | 1.993  | 2.9  |
| 13    | 2738.647      | 5.483  | 110.8 | 52            | 799.683  | 1.601  | 38.8 |
| 14    | 2129.028      | 4.262  | 8.2   | 53            | -0.000   | -0.000 | 21.8 |
| 15    | 2123.901      | 4.252  | 18.1  |               |          |        |      |
| 16    | 2121.582      | 4.247  | 15.6  |               |          |        |      |
| 17    | 2119.263      | 4.243  | 23.8  |               |          |        |      |
| 18    | 2113.525      | 4.231  | 65.2  |               |          |        |      |
| 19    | 2111.328      | 4.227  | 116.4 |               |          |        |      |
| 20    | 2109.497      | 4.223  | 120.9 |               |          |        |      |
| 21    | 2107.178      | 4.218  | 108.4 |               |          |        |      |
| 22    | 2104.980      | 4.214  | 55.8  |               |          |        |      |
| 23    | 2099.121      | 4.202  | 22.5  |               |          |        |      |
| 24    | 2096.802      | 4.198  | 25.8  |               |          |        |      |
| 25    | 2094.604      | 4.193  | 29.2  |               |          |        |      |
| 26    | 2093.506      | 4.191  | 30.9  |               |          |        |      |
| 27    | 2090.210      | 4.184  | 19.6  |               |          |        |      |
| 28    | 2081.909      | 4.168  | 15.4  |               |          |        |      |
| 29    | 2078.857      | 4.162  | 31.0  |               |          |        |      |
| 30    | 2075.684      | 4.155  | 17.8  |               |          |        |      |
| 31    | 2060.669      | 4.125  | 15.2  |               |          |        |      |
| 32    | 2057.739      | 4.119  | 11.6  |               |          |        |      |
| 33    | 2050.537      | 4.105  | 16.8  |               |          |        |      |
| 34    | 2047.241      | 4.098  | 26.0  |               |          |        |      |
| 35    | 2043.945      | 4.092  | 14.7  |               |          |        |      |
| 36    | 2036.743      | 4.077  | 15.3  |               |          |        |      |
| 37    | 2033.813      | 4.071  | 15.4  |               |          |        |      |
| 38    | 1876.099      | 3.756  | 17.3  |               |          |        |      |
| 39    | 1872.559      | 3.749  | 37.3  |               |          |        |      |

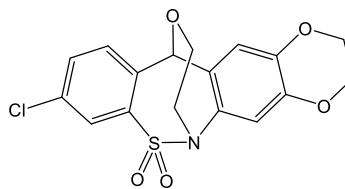

27

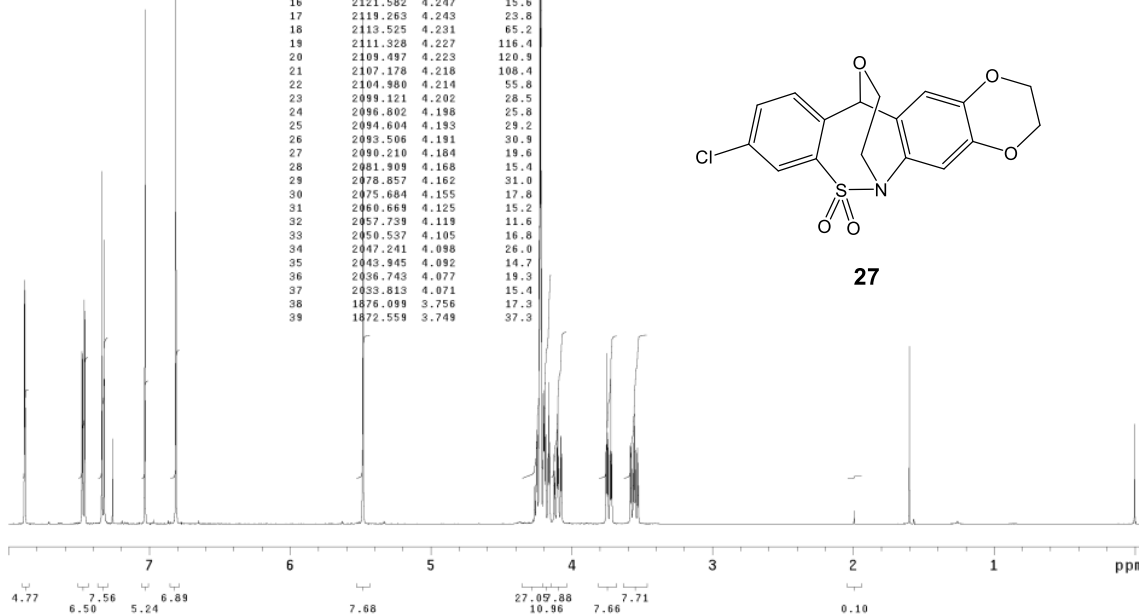

STANDARD 13C  
74867  
2180-BGE  
Bercsz Gabor  
2008.06.24. (BB)  
Solvent: CDCl3  
Temp. 30.0 C / 303.1 K  
User: 1-14-07  
INOVA-500 "1500"  
PULSE SEQUENCE  
Relax. delay 1.200 sec  
Pulse 90.0 degrees  
Acq. time 1.300 sec  
Width 32000.0 Hz  
2019 repetitions  
OBSERVE C13, 125.6055303 MHz  
DECOUPLE H1, 499.5269647 MHz  
Power 20 dB  
continuously on  
WALTZ-16 modulated  
DATA PROCESSING  
Line broadening 0.5 Hz  
FT size 131072  
Total time 84 minutes

| INDEX | FREQUENCY PPM | HEIGHT  |       |
|-------|---------------|---------|-------|
| 1     | 18178.230     | 144.714 | 7.8   |
| 2     | 18111.395     | 144.181 | 26.0  |
| 3     | 18092.781     | 144.033 | 28.9  |
| 4     | 17126.960     | 136.345 | 28.1  |
| 5     | 16871.589     | 134.312 | 10.6  |
| 6     | 16715.339     | 133.068 | 68.9  |
| 7     | 16639.656     | 132.465 | 126.4 |
| 8     | 16510.261     | 131.435 | 6.0   |
| 9     | 16384.285     | 130.432 | 7.7   |
| 10    | 16070.808     | 127.937 | 120.6 |
| 11    | 15036.628     | 119.704 | 142.6 |
| 12    | 14732.429     | 117.282 | 155.8 |
| 13    | 10448.250     | 83.177  | 128.3 |
| 14    | 9704.109      | 77.253  | 43.3  |
| 15    | 9672.371      | 77.000  | 45.6  |
| 16    | 9640.144      | 76.743  | 44.0  |
| 17    | 8075.203      | 64.285  | 149.9 |
| 18    | 8061.042      | 64.173  | 154.2 |
| 19    | 7772.468      | 61.875  | 157.0 |
| 20    | 6609.382      | 52.616  | 101.6 |

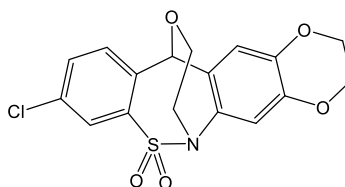

27

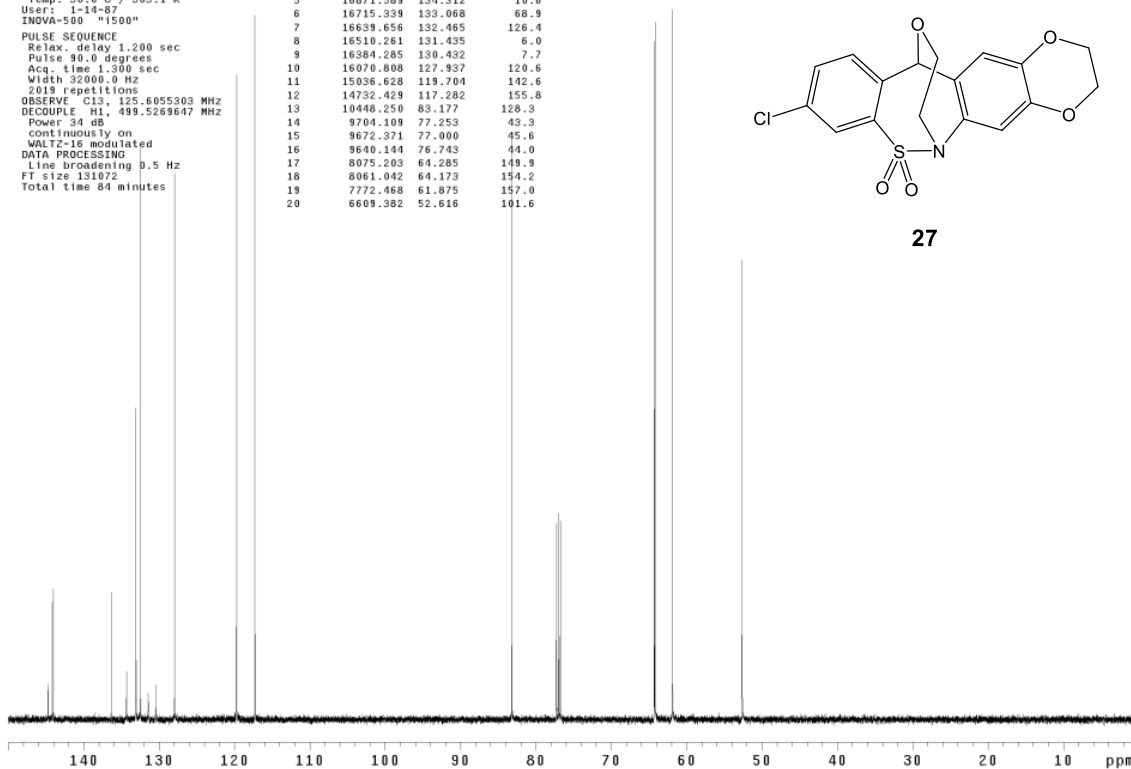

GMFCOPS\_DA  
 74867  
 2180-BGE  
 Berecz Gabor  
 2006.07.02. (DA)  
 Solvent: CDCl3  
 Temp. 30.0 C / 303.1 K  
 INOVA-500 "1500"  
 SEQUENCE: gmfcops\_da  
 Relax. delay 1.500 sec  
 Acq. time 0.197 sec  
 Width 5204.6 Hz  
 2D Width 5204.6 Hz  
 Single scan  
 2 x 256 increments  
 OBSERVE F1, 499.5244693 MHz  
 DATA PROCESSING  
 Sg. sine bell 0.197 sec  
 Shifted by -0.197 sec  
 F1 DATA PROCESSING  
 Sine bell 0.049 sec  
 Shifted by -0.049 sec  
 FT size 4096 x 512  
 Total time 14 minutes

27

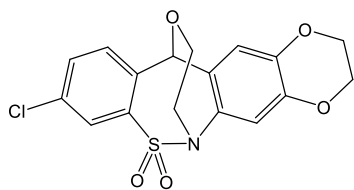

27

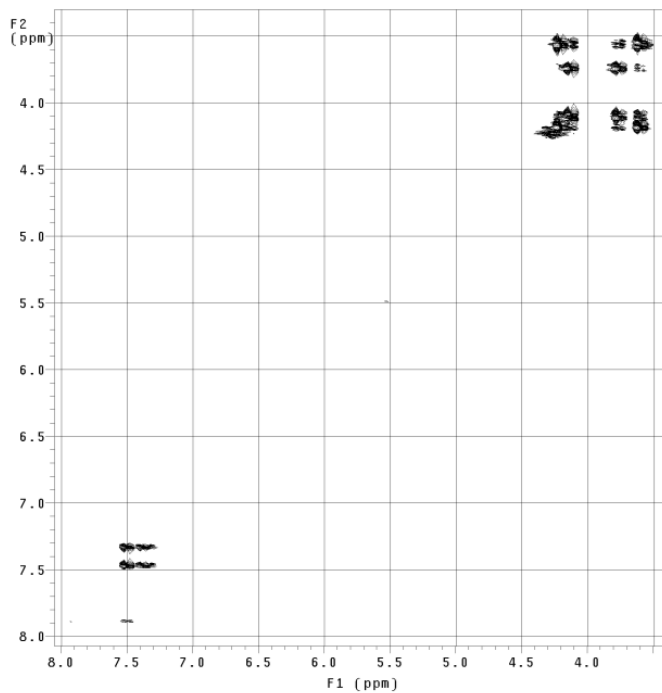

DPFGNDE\_DA (3.74 ppm)  
 74867  
 2180-BGE  
 Berecz Gabor  
 2006.07.02. (DA)  
 Solvent: CDCl3  
 Temp. 30.0 C / 303.1 K  
 INOVA-500 "1500"  
 PULSE SEQUENCE: dpfgnoe\_da  
 Relax. delay 2.000 sec  
 Pulse 90.0 degrees  
 Mixing 2.000 sec  
 Acq. time 5.000 sec  
 Width 8000.0 Hz  
 128 repetitions  
 OBSERVE H1, 499.5244696 MHz  
 DATA PROCESSING  
 Line broadening 1.0 Hz  
 FT size 131072  
 Total time 19 minutes

27

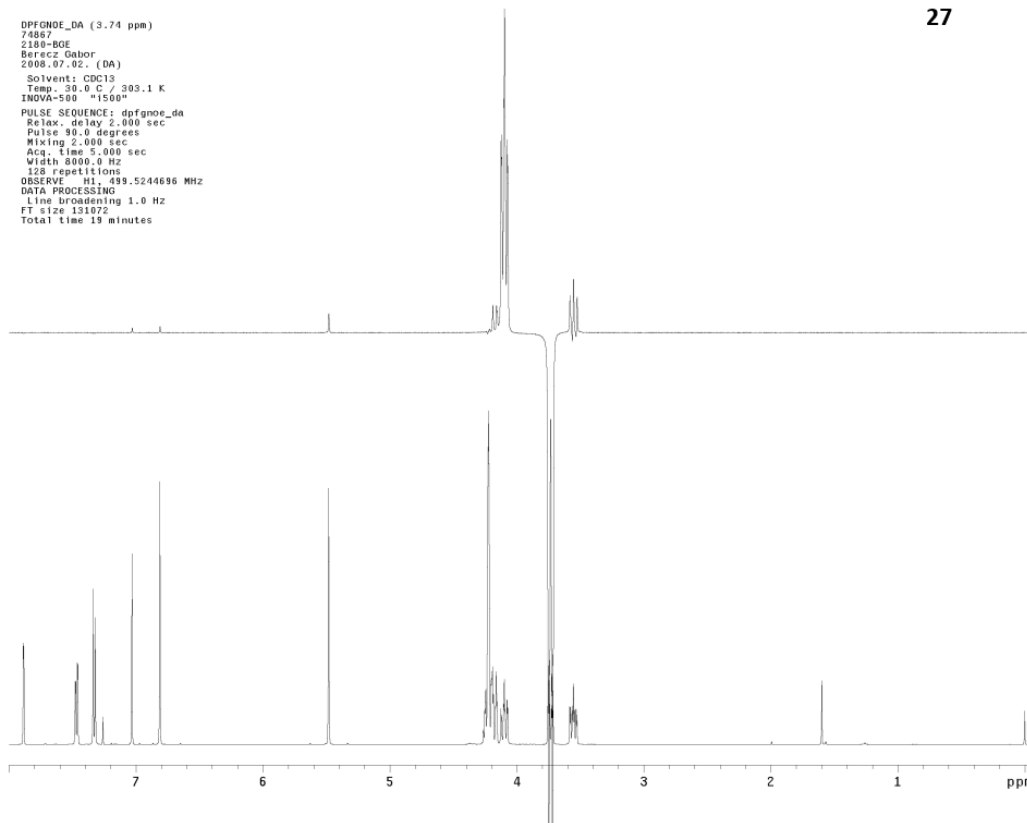

GHSQC\_DA (140 Hz)  
 74867  
 2180-BOE  
 Berecz Gabor  
 2008.07.02. (DA)  
 Solvent: CDCl3  
 Temp. 30.0 C / 303.1 K  
 INOVA-500 "1500"  
 PULSE SEQUENCE: ghsqc\_da  
 Relax. delay 1.500 sec  
 Acq. time 0.197 sec  
 Width 5204.6 Hz  
 2D Width 20576.1 Hz  
 2 repetitions  
 2 x 256 increments  
 OBSERVE H1, 499.5244709 MHz  
 DECOUPLE C13, 125.8148077 MHz  
 Power 44 dB  
 on during acquisition  
 off during delay  
 GARP-1 modulated  
 DATA PROCESSING  
 Sg, sine bell 0.203 sec  
 Shifted by -0.203 sec  
 F1 DATA PROCESSING  
 Sg, sine bell 0.006 sec  
 Shifted by -0.006 sec  
 FT size 4096 x 512  
 Total time 29 minutes

27

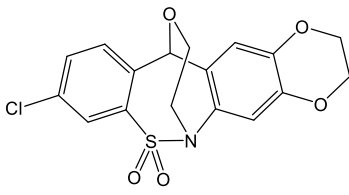

27

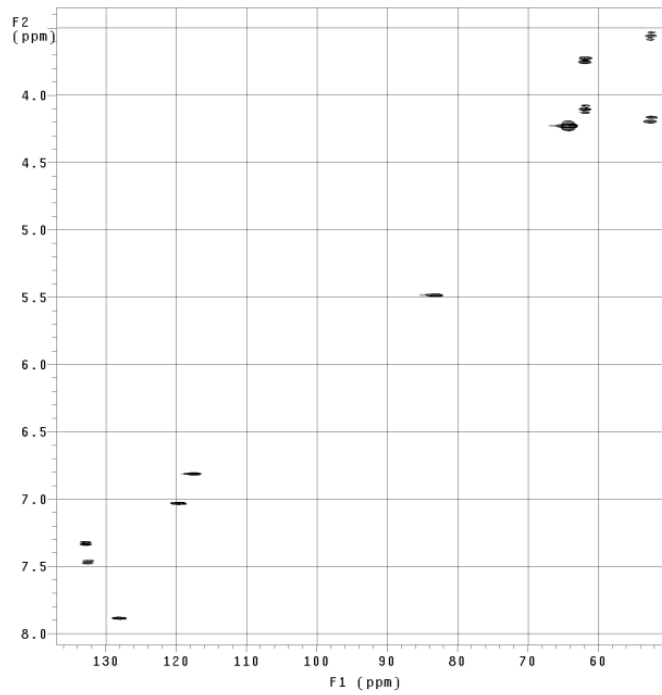

GHMOC\_DA (140 Hz, 8 Hz)  
 74867  
 2180-BOE  
 Berecz Gabor  
 2008.07.02. (DA)  
 Solvent: CDCl3  
 Temp. 30.0 C / 303.1 K  
 INOVA-500 "1500"  
 PULSE SEQUENCE: ghmqc\_da  
 Relax. delay 1.500 sec  
 Acq. time 0.197 sec  
 Width 5204.6 Hz  
 2D Width 20576.1 Hz  
 4 repetitions  
 256 increments  
 OBSERVE H1, 499.5244711 MHz  
 DATA PROCESSING  
 Sine bell 0.488 sec  
 F1 DATA PROCESSING  
 Sine bell 0.003 sec  
 FT size 4096 x 512  
 Total time 29 minutes

27

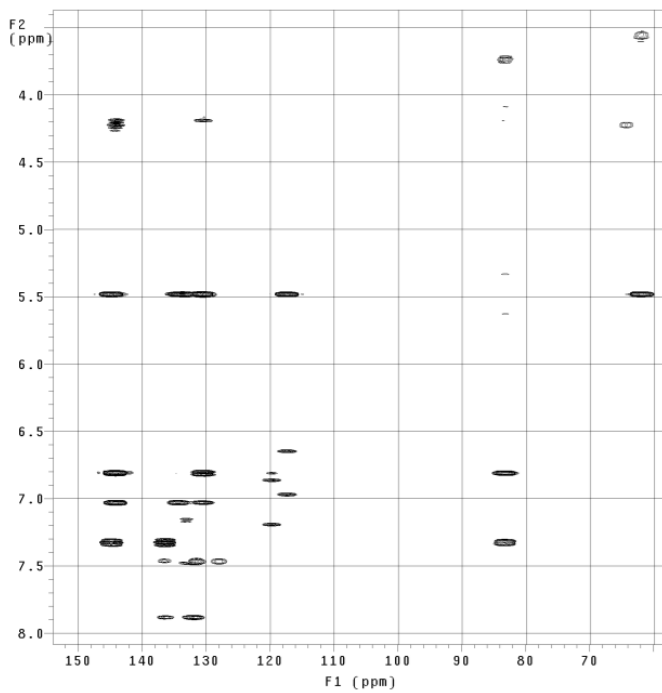

STANDARD 1H  
 64576  
 1986-BGE  
 Berecz Gabor  
 2006.07.25. (BT)  
 Solvent: DMSO  
 Temp. 25.0 C / 298.1 K  
 INOVA-500 "1500"  
 PULSE SEQUENCE  
 Relax. delay 3.000 sec  
 Pulse 6.4 usec  
 Acq. time 5.000 sec  
 Width 8000.0 Hz  
 16 repetitions  
 OBSERVE H1, 499.5268278 MHz  
 DATA PROCESSING  
 FT size 131072  
 Total time 2 minutes

| INDEX | FREQUENCY | PPM    | HEIGHT |
|-------|-----------|--------|--------|
| 1     | 5856.567  | 11.724 | 4.5    |
| 2     | 3950.317  | 7.908  | 27.7   |
| 3     | 3948.242  | 7.904  | 36.9   |
| 4     | 3942.139  | 7.892  | 33.7   |
| 5     | 3940.063  | 7.888  | 73.4   |
| 6     | 3937.500  | 7.882  | 63.4   |
| 7     | 3937.134  | 7.882  | 69.1   |
| 8     | 3935.425  | 7.878  | 42.0   |
| 9     | 3917.114  | 7.842  | 67.1   |
| 10    | 3916.626  | 7.841  | 58.7   |
| 11    | 3908.936  | 7.825  | 43.3   |
| 12    | 3908.447  | 7.824  | 38.0   |
| 13    | 3751.343  | 7.510  | 121.7  |
| 14    | 3344.116  | 6.695  | 121.8  |
| 15    | 2181.763  | 4.368  | 21.2   |
| 16    | 2178.955  | 4.362  | 31.4   |
| 17    | 2175.903  | 4.356  | 30.2   |
| 18    | 2173.828  | 4.352  | 33.8   |
| 19    | 2145.386  | 4.295  | 35.7   |
| 20    | 2143.311  | 4.291  | 28.7   |
| 21    | 2140.625  | 4.285  | 31.6   |
| 22    | 2137.451  | 4.279  | 22.1   |
| 23    | 1260.132  | 2.523  | 4.7    |
| 24    | 1258.179  | 2.519  | 10.8   |
| 25    | 1256.348  | 2.515  | 15.2   |
| 26    | 1254.517  | 2.511  | 10.7   |
| 27    | 1252.686  | 2.508  | 4.7    |
| 28    | 1042.236  | 2.086  | 13.4   |
| 29    | -0.000    | -0.000 | 27.5   |

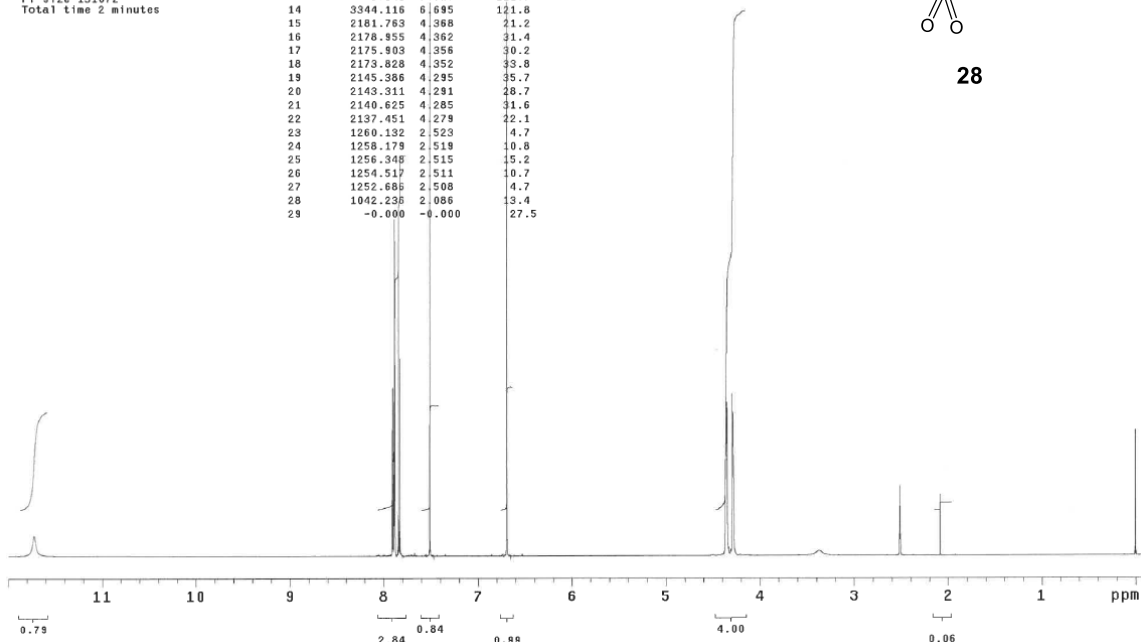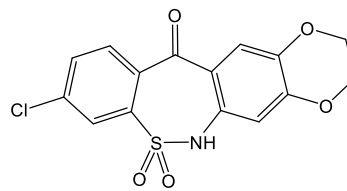

28

STANDARD 13C  
 64576  
 1986-BGE  
 Berecz Gabor  
 2006.07.25. (BT)  
 Solvent: DMSO  
 Temp. 25.0 C / 298.1 K  
 Users: 1-14-87  
 INOVA-500 "1500"  
 PULSE SEQUENCE  
 Relax. delay 3.000 sec  
 Pulse 6.0 usec  
 Acq. time 1.300 sec  
 Width 28208.7 Hz  
 128 repetitions  
 OBSERVE C13, 125.6061583 MHz  
 DECOUPLE H1, 499.5293374 MHz  
 Power 32 dB  
 continuously on  
 WALTZ-16 modulated  
 DATA PROCESSING  
 Line broadening 0.5 Hz  
 FT size 131072  
 Total time 9 minutes

| INDEX | FREQUENCY | PPM     | HEIGHT |
|-------|-----------|---------|--------|
| 1     | 23766.949 | 188.209 | 47.1   |
| 2     | 18782.946 | 149.532 | 63.0   |
| 3     | 17652.633 | 140.534 | 58.0   |
| 4     | 17541.582 | 139.650 | 62.3   |
| 5     | 17226.076 | 137.138 | 59.1   |
| 6     | 16889.909 | 134.462 | 51.5   |
| 7     | 16779.680 | 133.513 | 59.4   |
| 8     | 16702.241 | 132.986 | 61.7   |
| 9     | 16631.220 | 132.402 | 59.0   |
| 10    | 15325.722 | 122.009 | 62.8   |
| 11    | 15119.976 | 120.371 | 59.7   |
| 12    | 14867.313 | 118.360 | 67.3   |
| 13    | 13660.383 | 108.751 | 66.7   |
| 14    | 8167.449  | 65.181  | 52.4   |
| 15    | 8047.930  | 64.071  | 51.8   |
| 16    | 5050.036  | 40.204  | 30.0   |
| 17    | 5028.945  | 40.036  | 95.7   |
| 18    | 5007.854  | 39.868  | 186.4  |
| 19    | 4986.762  | 39.700  | 214.3  |
| 20    | 4966.102  | 39.536  | 186.0  |
| 21    | 4945.011  | 39.368  | 94.5   |
| 22    | 4923.919  | 39.200  | 30.3   |

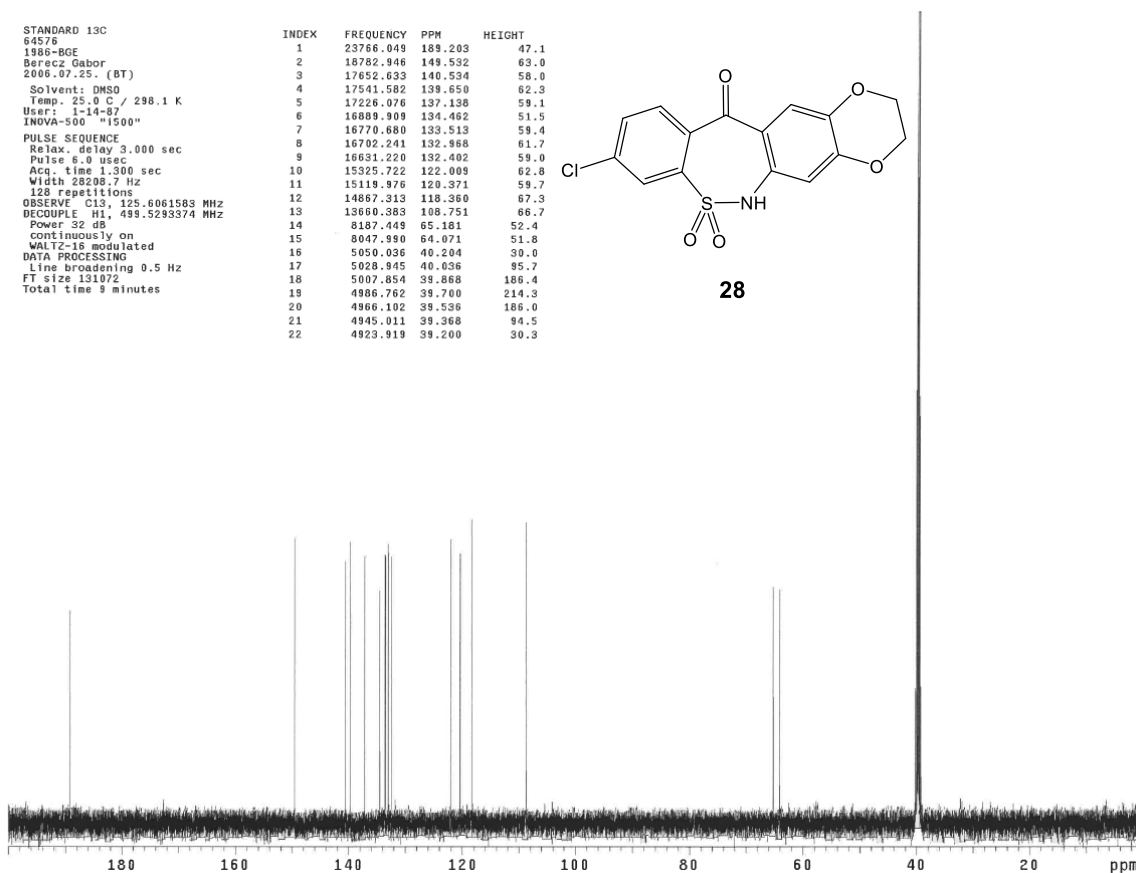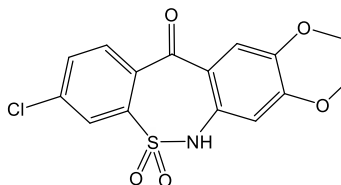

28

STANDARD 1H  
79018  
2155-BGE  
Berez Gabor  
2008.02.27. (BT)  
Solvent: CDC13  
Temp. 25.0 C / 298.1 K  
INOVA-500 "1500"  
PULSE SEQUENCE  
Relax. delay 1.000 sec  
Pulse 6.4 usec  
Acq. time 5.000 sec  
Width 8000.0 Hz  
32 repetitions  
OBSERVE H1, 499.5244681 MHz  
DATA PROCESSING  
FT size 131072  
Total time 3 minutes

| INDEX | FREQUENCY | PPM   | HEIGHT |
|-------|-----------|-------|--------|
| 1     | 4041.992  | 8.092 | 57.0   |
| 2     | 4033.569  | 8.075 | 61.5   |
| 3     | 3985.640  | 7.979 | 51.2   |
| 4     | 3983.765  | 7.975 | 53.5   |
| 5     | 3921.143  | 7.850 | 103.4  |
| 6     | 3835.205  | 7.678 | 40.3   |
| 7     | 3833.008  | 7.673 | 39.2   |
| 8     | 3826.782  | 7.661 | 37.3   |
| 9     | 3824.585  | 7.656 | 36.6   |
| 10    | 3628.540  | 7.264 | 21.6   |
| 11    | 3429.932  | 6.866 | 114.6  |
| 12    | 2178.955  | 4.362 | 24.7   |
| 13    | 2175.903  | 4.356 | 39.5   |
| 14    | 2172.607  | 4.349 | 37.2   |
| 15    | 2170.654  | 4.345 | 40.8   |
| 16    | 2169.678  | 4.343 | 33.4   |
| 17    | 2154.175  | 4.312 | 38.4   |
| 18    | 2153.198  | 4.310 | 37.8   |
| 19    | 2151.245  | 4.307 | 37.6   |
| 20    | 2149.170  | 4.302 | 35.1   |
| 21    | 2148.560  | 4.301 | 36.0   |
| 22    | 2147.949  | 4.300 | 34.0   |
| 23    | 2145.508  | 4.295 | 24.9   |
| 24    | 2005.005  | 4.014 | 24.7   |
| 25    | 1997.803  | 3.999 | 49.1   |
| 26    | 1990.723  | 3.985 | 25.9   |
| 27    | 1690.308  | 3.384 | 16.6   |
| 28    | 1683.350  | 3.370 | 29.5   |
| 29    | 1676.270  | 3.356 | 14.7   |
| 30    | 1000.000  | 2.002 | 2.7    |
| 31    | 792.358   | 1.586 | 18.6   |
| 32    | 0.000     | 0.000 | 22.1   |

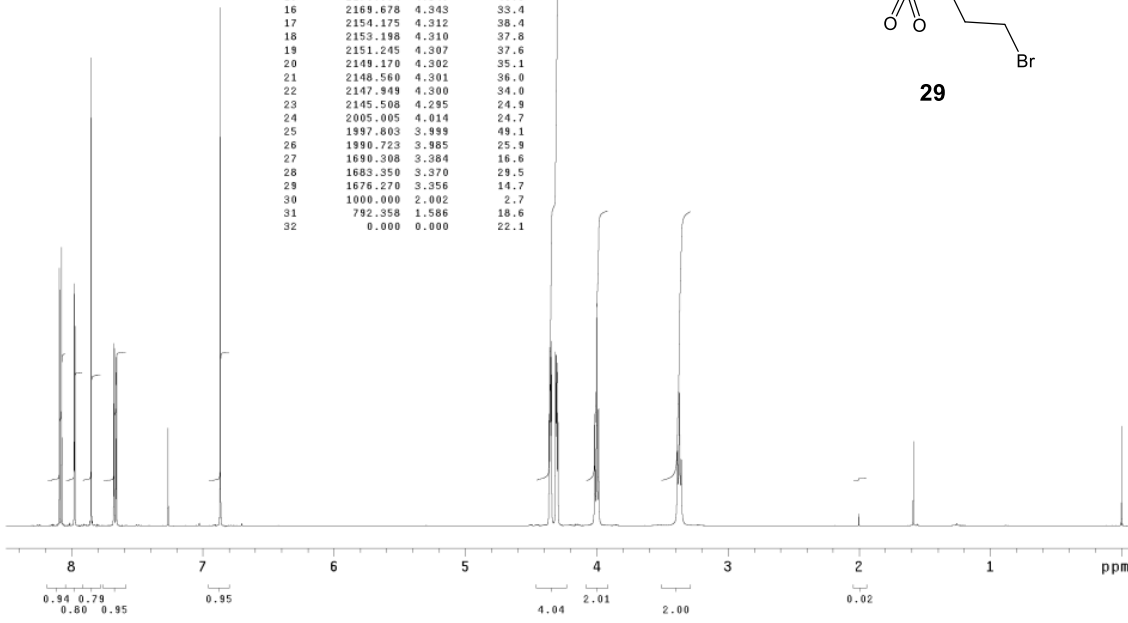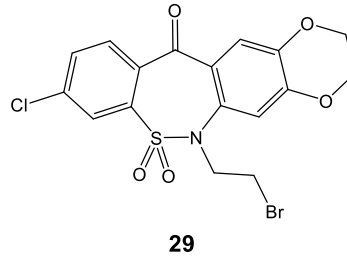

STANDARD 13C  
79018  
2155-BGE  
Berez Gabor  
2008.02.27. (BT)  
Solvent: CDC13  
Temp. 25.0 C / 298.1 K  
User: 1-14-07  
INOVA-500 "1500"  
PULSE SEQUENCE  
Relax. delay 3.000 sec  
Pulse 6.0 usec  
Acq. time 1.300 sec  
Width 32000.0 Hz  
512 repetitions  
OBSERVE C13, 125.6055313 MHz  
DECOUPLE H1, 499.5269647 MHz  
Power 32 dB  
continuously on  
WALTZ-16 modulated  
DATA PROCESSING  
Line broadening 0.5 Hz  
FT size 131072  
Total time 36 minutes

| INDEX | FREQUENCY | PPM     | HEIGHT |
|-------|-----------|---------|--------|
| 1     | 23416.511 | 186.415 | 38.4   |
| 2     | 18733.406 | 149.133 | 48.8   |
| 3     | 17943.367 | 142.844 | 48.0   |
| 4     | 17544.441 | 139.668 | 37.2   |
| 5     | 17454.597 | 138.953 | 41.8   |
| 6     | 16862.800 | 134.242 | 88.1   |
| 7     | 16770.515 | 133.507 | 47.4   |
| 8     | 16729.500 | 133.181 | 89.0   |
| 9     | 16699.226 | 132.940 | 46.1   |
| 10    | 15929.207 | 126.810 | 31.7   |
| 11    | 15802.742 | 125.803 | 99.0   |
| 12    | 15209.968 | 121.004 | 96.0   |
| 13    | 14301.277 | 113.850 | 86.7   |
| 14    | 9704.109  | 77.253  | 138.0  |
| 15    | 9672.371  | 77.000  | 142.0  |
| 16    | 9640.144  | 76.743  | 139.1  |
| 17    | 8158.211  | 64.946  | 89.4   |
| 18    | 8045.906  | 64.052  | 87.6   |
| 19    | 6678.718  | 53.168  | 69.2   |
| 20    | 3504.402  | 27.888  | 73.6   |

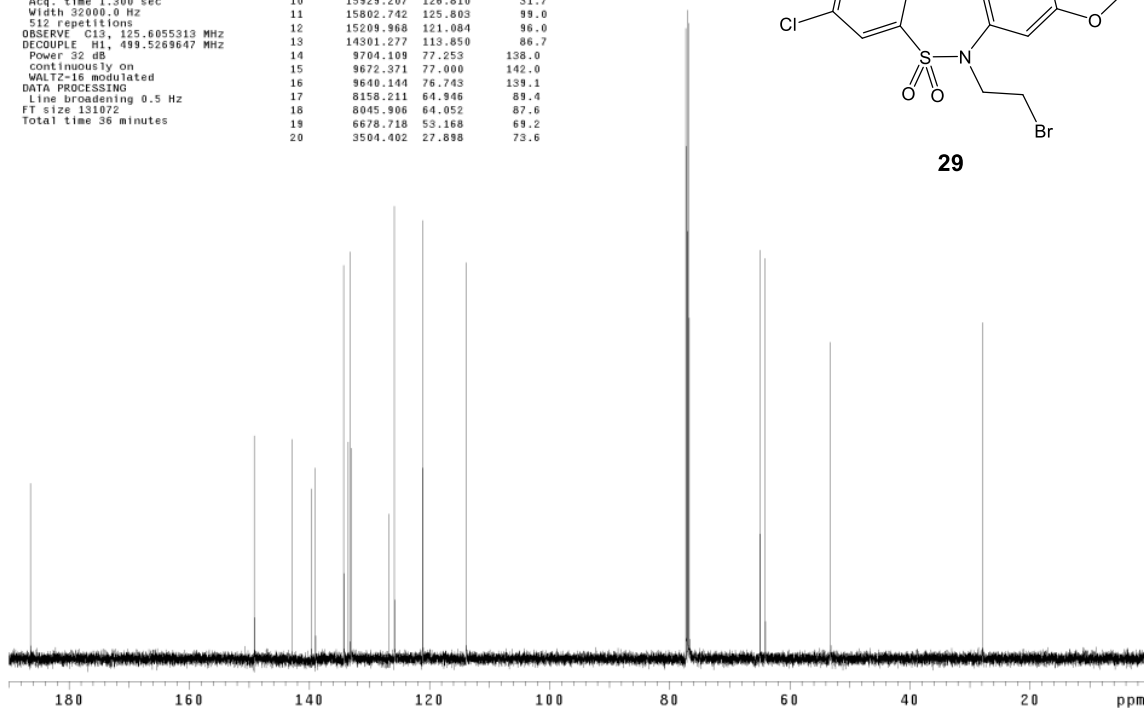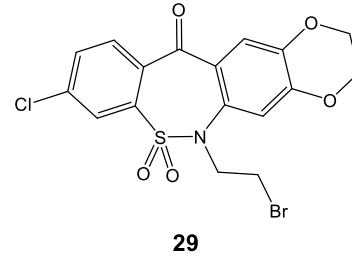

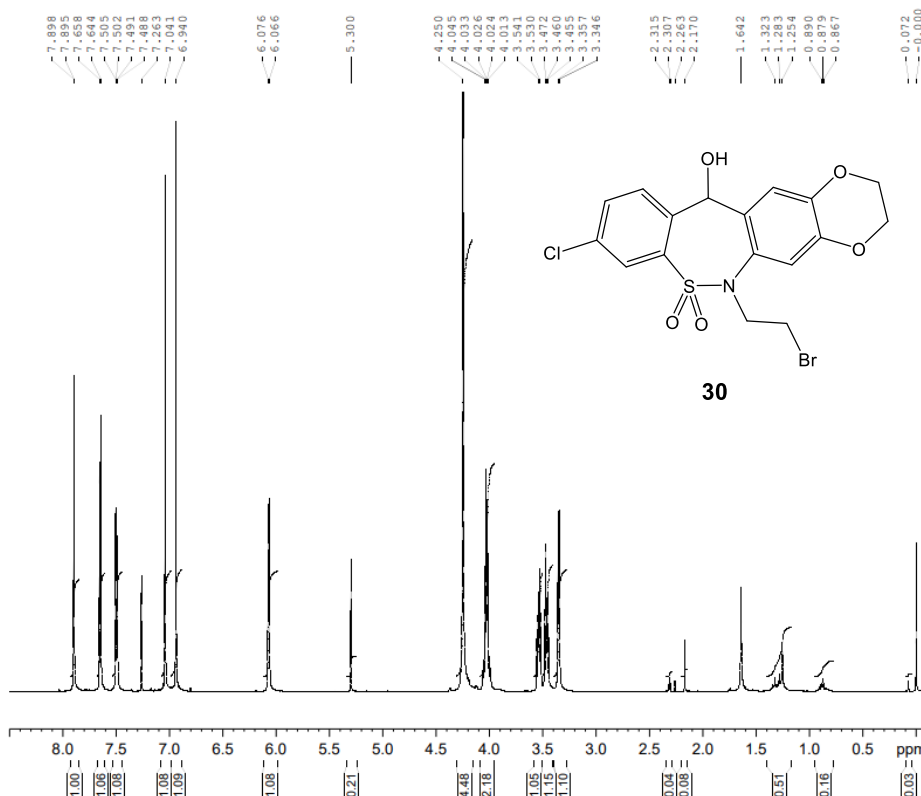

Standard 1H  
144447  
bge2363-2363-BGE\_1  
Berez Gabor  
2025.03.28. (KP)

Current Data Parameters  
NAME 144447  
EXPNO 11  
PROCNO 1

F2 - Acquisition Parameters  
Date\_ 20250328  
Time\_ 10.34 h  
INSTRUM spect  
PROBHD 2145856\_0002 ( )  
PULPROG zg30  
TD 65536  
SOLVENT CDCl3  
NS 16  
DS 2  
SWH 12019.230 Hz  
FIDRES 0.366798 Hz  
AQ 2.7262976 sec  
RG 196.07  
DW 41.600 usec  
DE 25.00 usec  
TE 295.0 K  
D1 1.00000000 sec  
TD0  
SFO1 600.0037050 MHz  
NUC1 1H  
P1 11.50 usec  
PLW1 28.00000000 W

F2 - Processing parameters  
SI 65536  
SF 600.0000120 MHz  
WDW EM  
SSB 0  
LB 0.30 Hz  
GB 0  
PC 1.00

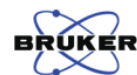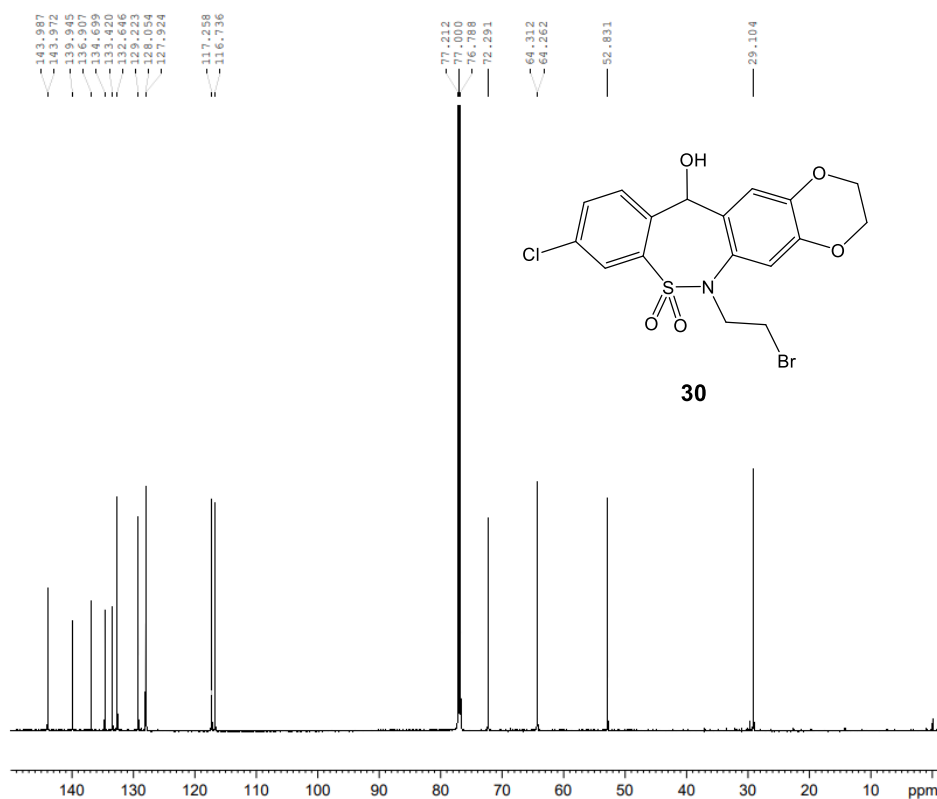

Standard 13C  
144447  
bge2363-2363-BGE\_1  
Berez Gabor  
2025.03.28. (KP)

Current Data Parameters  
NAME 144447  
EXPNO 21  
PROCNO 1

F2 - Acquisition Parameters  
Date\_ 20250329  
Time\_ 12.15 h  
INSTRUM spect  
PROBHD Z145856\_0002 ( )  
PULPROG zgpg30  
TD 65536  
SOLVENT CDCl3  
NS 2048  
DS 4  
SWH 36231.883 Hz  
FIDRES 1.105709 Hz  
AQ 0.9043968 sec  
RG 196.07  
DW 13.800 usec  
DE 18.00 usec  
TE 295.0 K  
D1 1.00000000 sec  
D11 0.03000000 sec  
TD0 1  
SFO1 150.8852070 MHz  
NUC1 13C  
P1 9.80 usec  
PLW1 72.69999695 W  
SFO2 600.0024000 MHz  
NUC2 1H  
CPDPRG2 waltz16  
PCPD2 80.00 usec  
PLW2 32.50000000 W  
PLW12 0.70708001 W  
PLW13 0.35508999 W

F2 - Processing parameters  
SI 131072  
SF 150.8701299 MHz  
WDW EM  
SSB 0  
LB 1.00 Hz  
GB 0  
PC 1.40

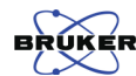

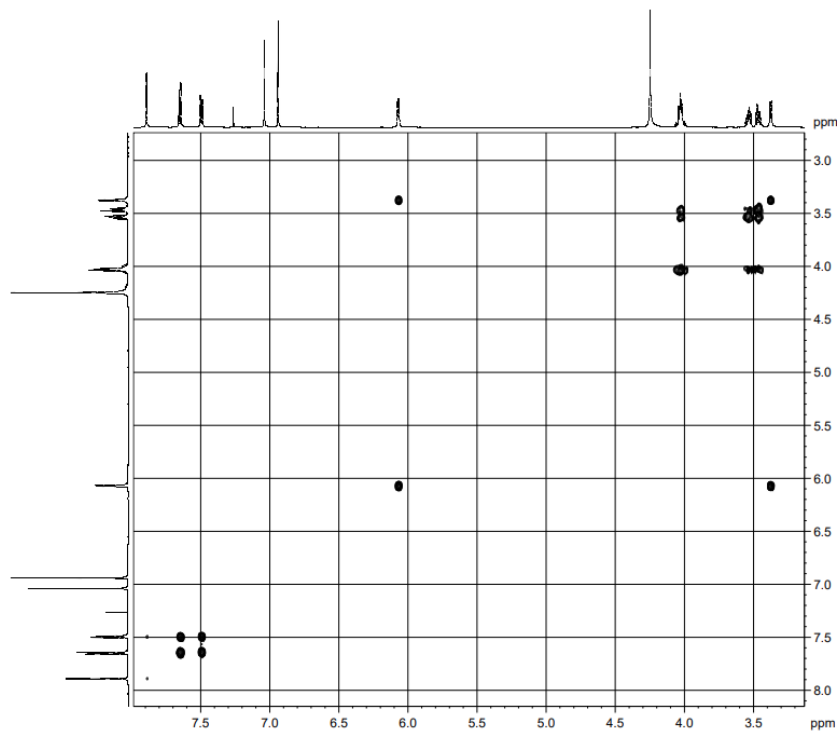

COSY  
144447  
bge2363-2363-BGE\_1  
Berecz Gabor  
2025.03.28. (KP)

Current Data Parameters  
NAME 144447  
EXPNO 22  
PROCNO 1  
F2 - Acquisition Parameters  
Date\_ 20250328  
Time 15:40 h  
INSTRUM spect  
PROBHD zgpg30  
PULPROG zgpg30  
TD 65536  
SOLVENT CDCl3  
NS 16  
DS 4  
SWH 7812.500 Hz  
FIDRES 0.620300 Hz  
AQ 0.111870 sec  
RG 655.00  
WM 64.000 usec  
DE 23.00 usec  
TE 300.2 K  
D0 0.0000000 sec  
D1 2.0000000 sec  
D13 0.0000000 sec  
D14 0.0000000 sec  
TM 0.0001800 sec  
TMR 1  
SFO 600.000000 MHz  
NUC1 13  
P1 18.0000000 usec  
PL1 0.0000000 W  
SFO1 600.000000 MHz  
CPDPRG2 SMOG2.100  
SFO2 600.000000 MHz  
CPDPRG3 SMOG3.100  
SFO3 600.000000 MHz  
SFO4 600.000000 MHz  
SFO5 600.000000 MHz  
SFO6 600.000000 MHz  
SFO7 600.000000 MHz  
SFO8 600.000000 MHz  
SFO9 600.000000 MHz  
SFO10 600.000000 MHz  
SFO11 600.000000 MHz  
SFO12 600.000000 MHz  
SFO13 600.000000 MHz  
SFO14 600.000000 MHz  
SFO15 600.000000 MHz  
SFO16 600.000000 MHz  
SFO17 600.000000 MHz  
SFO18 600.000000 MHz  
SFO19 600.000000 MHz  
SFO20 600.000000 MHz  
SFO21 600.000000 MHz  
SFO22 600.000000 MHz  
SFO23 600.000000 MHz  
SFO24 600.000000 MHz  
SFO25 600.000000 MHz  
SFO26 600.000000 MHz  
SFO27 600.000000 MHz  
SFO28 600.000000 MHz  
SFO29 600.000000 MHz  
SFO30 600.000000 MHz  
SFO31 600.000000 MHz  
SFO32 600.000000 MHz  
SFO33 600.000000 MHz  
SFO34 600.000000 MHz  
SFO35 600.000000 MHz  
SFO36 600.000000 MHz  
SFO37 600.000000 MHz  
SFO38 600.000000 MHz  
SFO39 600.000000 MHz  
SFO40 600.000000 MHz  
SFO41 600.000000 MHz  
SFO42 600.000000 MHz  
SFO43 600.000000 MHz  
SFO44 600.000000 MHz  
SFO45 600.000000 MHz  
SFO46 600.000000 MHz  
SFO47 600.000000 MHz  
SFO48 600.000000 MHz  
SFO49 600.000000 MHz  
SFO50 600.000000 MHz  
SFO51 600.000000 MHz  
SFO52 600.000000 MHz  
SFO53 600.000000 MHz  
SFO54 600.000000 MHz  
SFO55 600.000000 MHz  
SFO56 600.000000 MHz  
SFO57 600.000000 MHz  
SFO58 600.000000 MHz  
SFO59 600.000000 MHz  
SFO60 600.000000 MHz  
SFO61 600.000000 MHz  
SFO62 600.000000 MHz  
SFO63 600.000000 MHz  
SFO64 600.000000 MHz  
SFO65 600.000000 MHz  
SFO66 600.000000 MHz  
SFO67 600.000000 MHz  
SFO68 600.000000 MHz  
SFO69 600.000000 MHz  
SFO70 600.000000 MHz  
SFO71 600.000000 MHz  
SFO72 600.000000 MHz  
SFO73 600.000000 MHz  
SFO74 600.000000 MHz  
SFO75 600.000000 MHz  
SFO76 600.000000 MHz  
SFO77 600.000000 MHz  
SFO78 600.000000 MHz  
SFO79 600.000000 MHz  
SFO80 600.000000 MHz  
SFO81 600.000000 MHz  
SFO82 600.000000 MHz  
SFO83 600.000000 MHz  
SFO84 600.000000 MHz  
SFO85 600.000000 MHz  
SFO86 600.000000 MHz  
SFO87 600.000000 MHz  
SFO88 600.000000 MHz  
SFO89 600.000000 MHz  
SFO90 600.000000 MHz  
SFO91 600.000000 MHz  
SFO92 600.000000 MHz  
SFO93 600.000000 MHz  
SFO94 600.000000 MHz  
SFO95 600.000000 MHz  
SFO96 600.000000 MHz  
SFO97 600.000000 MHz  
SFO98 600.000000 MHz  
SFO99 600.000000 MHz  
SFO100 600.000000 MHz

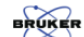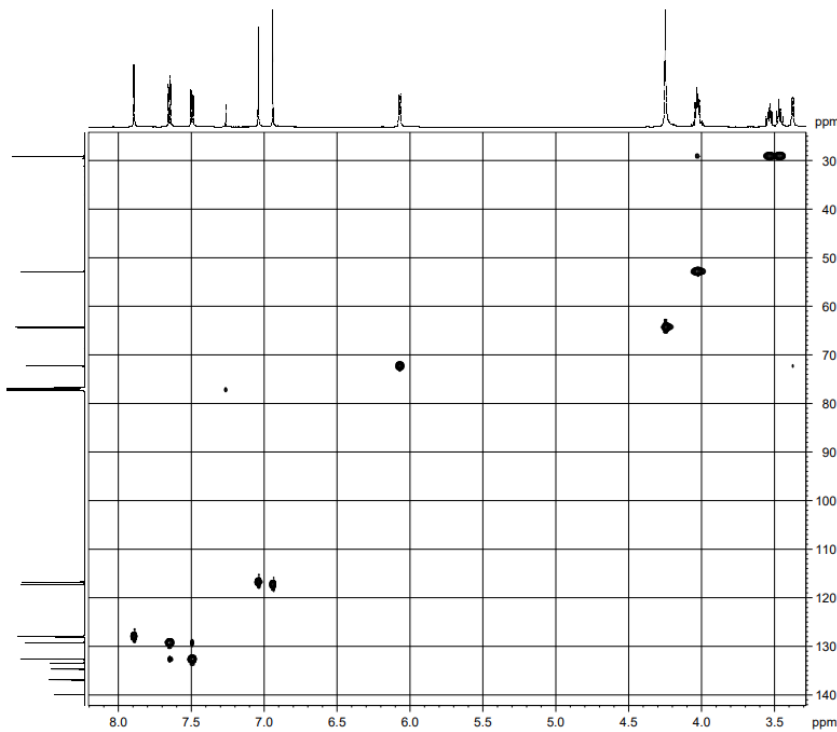

HSQC (140Hz)  
144447  
bge2363-2363-BGE\_1  
Berecz Gabor  
2025.03.28. (KP)

Current Data Parameters  
NAME 144447  
EXPNO 22  
PROCNO 1  
F2 - Acquisition Parameters  
Date\_ 20250328  
Time 15:40 h  
INSTRUM spect  
PROBHD zgpg30  
PULPROG zgpg30  
TD 65536  
SOLVENT CDCl3  
NS 16  
DS 4  
SWH 7812.500 Hz  
FIDRES 0.620300 Hz  
AQ 0.111870 sec  
RG 655.00  
WM 64.000 usec  
DE 23.00 usec  
TE 300.2 K  
D0 0.0000000 sec  
D1 2.0000000 sec  
D13 0.0000000 sec  
D14 0.0000000 sec  
TM 0.0001800 sec  
TMR 1  
SFO 600.000000 MHz  
NUC1 13  
P1 18.0000000 usec  
PL1 0.0000000 W  
SFO1 600.000000 MHz  
CPDPRG2 SMOG2.100  
SFO2 600.000000 MHz  
CPDPRG3 SMOG3.100  
SFO3 600.000000 MHz  
SFO4 600.000000 MHz  
SFO5 600.000000 MHz  
SFO6 600.000000 MHz  
SFO7 600.000000 MHz  
SFO8 600.000000 MHz  
SFO9 600.000000 MHz  
SFO10 600.000000 MHz  
SFO11 600.000000 MHz  
SFO12 600.000000 MHz  
SFO13 600.000000 MHz  
SFO14 600.000000 MHz  
SFO15 600.000000 MHz  
SFO16 600.000000 MHz  
SFO17 600.000000 MHz  
SFO18 600.000000 MHz  
SFO19 600.000000 MHz  
SFO20 600.000000 MHz  
SFO21 600.000000 MHz  
SFO22 600.000000 MHz  
SFO23 600.000000 MHz  
SFO24 600.000000 MHz  
SFO25 600.000000 MHz  
SFO26 600.000000 MHz  
SFO27 600.000000 MHz  
SFO28 600.000000 MHz  
SFO29 600.000000 MHz  
SFO30 600.000000 MHz  
SFO31 600.000000 MHz  
SFO32 600.000000 MHz  
SFO33 600.000000 MHz  
SFO34 600.000000 MHz  
SFO35 600.000000 MHz  
SFO36 600.000000 MHz  
SFO37 600.000000 MHz  
SFO38 600.000000 MHz  
SFO39 600.000000 MHz  
SFO40 600.000000 MHz  
SFO41 600.000000 MHz  
SFO42 600.000000 MHz  
SFO43 600.000000 MHz  
SFO44 600.000000 MHz  
SFO45 600.000000 MHz  
SFO46 600.000000 MHz  
SFO47 600.000000 MHz  
SFO48 600.000000 MHz  
SFO49 600.000000 MHz  
SFO50 600.000000 MHz  
SFO51 600.000000 MHz  
SFO52 600.000000 MHz  
SFO53 600.000000 MHz  
SFO54 600.000000 MHz  
SFO55 600.000000 MHz  
SFO56 600.000000 MHz  
SFO57 600.000000 MHz  
SFO58 600.000000 MHz  
SFO59 600.000000 MHz  
SFO60 600.000000 MHz  
SFO61 600.000000 MHz  
SFO62 600.000000 MHz  
SFO63 600.000000 MHz  
SFO64 600.000000 MHz  
SFO65 600.000000 MHz  
SFO66 600.000000 MHz  
SFO67 600.000000 MHz  
SFO68 600.000000 MHz  
SFO69 600.000000 MHz  
SFO70 600.000000 MHz  
SFO71 600.000000 MHz  
SFO72 600.000000 MHz  
SFO73 600.000000 MHz  
SFO74 600.000000 MHz  
SFO75 600.000000 MHz  
SFO76 600.000000 MHz  
SFO77 600.000000 MHz  
SFO78 600.000000 MHz  
SFO79 600.000000 MHz  
SFO80 600.000000 MHz  
SFO81 600.000000 MHz  
SFO82 600.000000 MHz  
SFO83 600.000000 MHz  
SFO84 600.000000 MHz  
SFO85 600.000000 MHz  
SFO86 600.000000 MHz  
SFO87 600.000000 MHz  
SFO88 600.000000 MHz  
SFO89 600.000000 MHz  
SFO90 600.000000 MHz  
SFO91 600.000000 MHz  
SFO92 600.000000 MHz  
SFO93 600.000000 MHz  
SFO94 600.000000 MHz  
SFO95 600.000000 MHz  
SFO96 600.000000 MHz  
SFO97 600.000000 MHz  
SFO98 600.000000 MHz  
SFO99 600.000000 MHz  
SFO100 600.000000 MHz

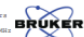

HMBC (8Hz, 140Hz) 30  
 144447  
 bge2363-2363-BGE\_1  
 Berecz Gabor  
 2025.03.28. (KP)

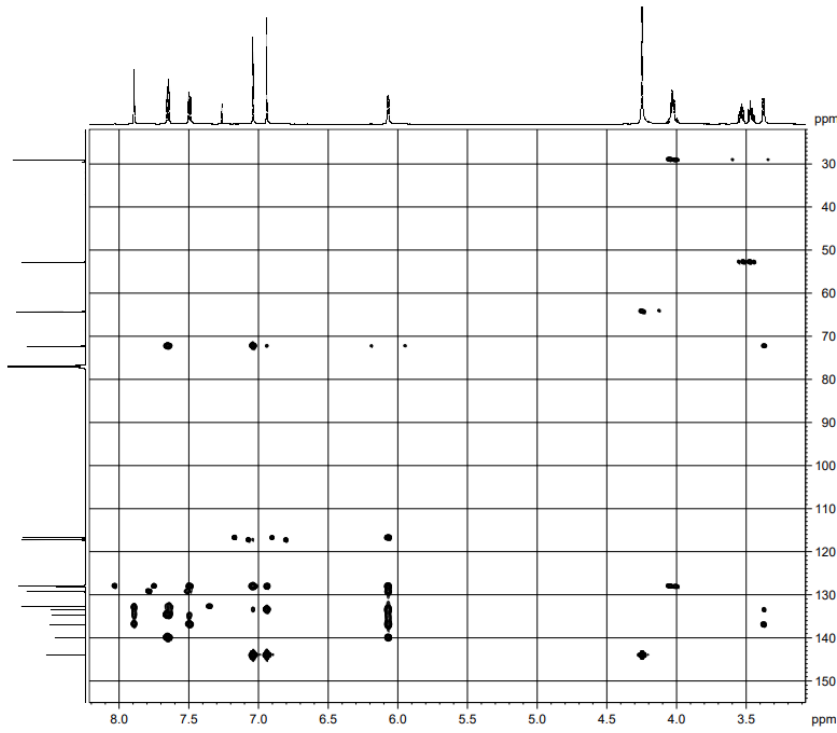

```

Current Data Parameters
NAME      144447
EXPNO    24
PROCNO   1

F2 - Acquisition Parameters
Date_    20250328
Time     15:27 h
INSTRUM  spect
PROBHD   1H40MM QNP5 1
PULPROG  zgpg30
TD        2688
SOLVENT  DMSO-d6
NS        4
DS        4
SWH       7812.500 Hz
FIDRES    7.420990 Hz
AQ         0.111970 sec
RG         186.00
SR         64.000 usec
DE         29.00 usec
TE        300.2 K

CSTG2    140.000000
CSTG11   0.000000
DQ        0.000000 wac
DQ1       1.000000 wac
DQ2       0.001784 wac
DQ3       0.0220000 wac
DQ4       0.0000000 wac
DQ5       0.0000000 wac
DQ6       0.0000000 wac
DQ7       0.0000000 wac
DQ8       0.0000000 wac
DQ9       0.0000000 wac
DQ10      0.0000000 wac
DQ11      0.0000000 wac
DQ12      0.0000000 wac
DQ13      0.0000000 wac
DQ14      0.0000000 wac
DQ15      0.0000000 wac
DQ16      0.0000000 wac
DQ17      0.0000000 wac
DQ18      0.0000000 wac
DQ19      0.0000000 wac
DQ20      0.0000000 wac
DQ21      0.0000000 wac
DQ22      0.0000000 wac
DQ23      0.0000000 wac
DQ24      0.0000000 wac
DQ25      0.0000000 wac
DQ26      0.0000000 wac
DQ27      0.0000000 wac
DQ28      0.0000000 wac
DQ29      0.0000000 wac
DQ30      0.0000000 wac
DQ31      0.0000000 wac
DQ32      0.0000000 wac
DQ33      0.0000000 wac
DQ34      0.0000000 wac
DQ35      0.0000000 wac
DQ36      0.0000000 wac
DQ37      0.0000000 wac
DQ38      0.0000000 wac
DQ39      0.0000000 wac
DQ40      0.0000000 wac
DQ41      0.0000000 wac
DQ42      0.0000000 wac
DQ43      0.0000000 wac
DQ44      0.0000000 wac
DQ45      0.0000000 wac
DQ46      0.0000000 wac
DQ47      0.0000000 wac
DQ48      0.0000000 wac
DQ49      0.0000000 wac
DQ50      0.0000000 wac
DQ51      0.0000000 wac
DQ52      0.0000000 wac
DQ53      0.0000000 wac
DQ54      0.0000000 wac
DQ55      0.0000000 wac
DQ56      0.0000000 wac
DQ57      0.0000000 wac
DQ58      0.0000000 wac
DQ59      0.0000000 wac
DQ60      0.0000000 wac
DQ61      0.0000000 wac
DQ62      0.0000000 wac
DQ63      0.0000000 wac
DQ64      0.0000000 wac
DQ65      0.0000000 wac
DQ66      0.0000000 wac
DQ67      0.0000000 wac
DQ68      0.0000000 wac
DQ69      0.0000000 wac
DQ70      0.0000000 wac
DQ71      0.0000000 wac
DQ72      0.0000000 wac
DQ73      0.0000000 wac
DQ74      0.0000000 wac
DQ75      0.0000000 wac
DQ76      0.0000000 wac
DQ77      0.0000000 wac
DQ78      0.0000000 wac
DQ79      0.0000000 wac
DQ80      0.0000000 wac
DQ81      0.0000000 wac
DQ82      0.0000000 wac
DQ83      0.0000000 wac
DQ84      0.0000000 wac
DQ85      0.0000000 wac
DQ86      0.0000000 wac
DQ87      0.0000000 wac
DQ88      0.0000000 wac
DQ89      0.0000000 wac
DQ90      0.0000000 wac
DQ91      0.0000000 wac
DQ92      0.0000000 wac
DQ93      0.0000000 wac
DQ94      0.0000000 wac
DQ95      0.0000000 wac
DQ96      0.0000000 wac
DQ97      0.0000000 wac
DQ98      0.0000000 wac
DQ99      0.0000000 wac
DQ100     0.0000000 wac

F1 - Acquisition parameters
ID        1
PROBHD    1H40MM QNP5 1
PULPROG    zgpg30
TD          2688
SOLVENT    DMSO-d6
NS          4
DS          4
SWH         7812.500 Hz
FIDRES      7.420990 Hz
AQ           0.111970 sec
RG           186.00
SR           64.000 usec
DE           29.00 usec
TE          300.2 K

F2 - Processing parameters
SI         2688
SF         600.000192 MHz
WDW        EM
SSB         0
LB          0 Hz
GB          0
PC          1.40

F1 - Processing parameters
SI         1024
SF         600.000192 MHz
WDW        EM
SSB         0
LB          0 Hz
GB          0
PC          1.40
  
```

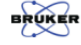



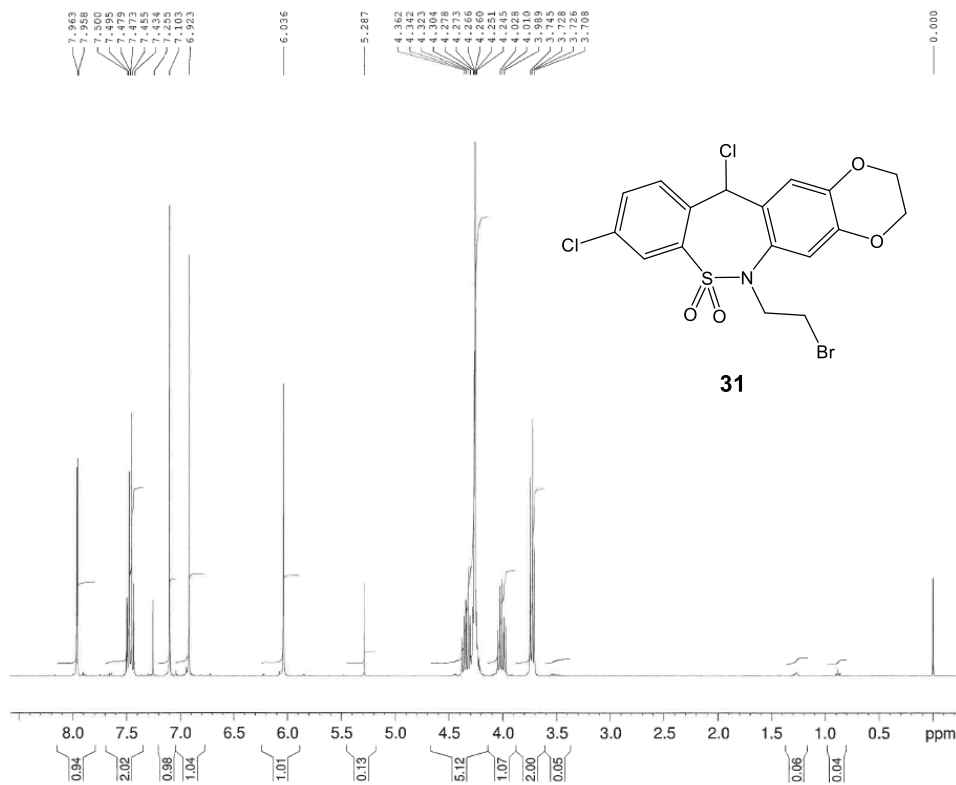

Standard 1H  
85354  
2364-BGE  
Berez Gabor  
2010.03.18. (BB)

NAME 85354  
EXPNO 1  
PROCNO 1  
Date\_ 20100318  
Time 14.34  
INSTRUM spect  
PROBHD 5 mm PABBO BB-  
PULPROG zg30  
TD 65536  
SOLVENT CDC13  
NS 64  
DS 2  
SWH 8223.685 Hz  
FIDRES 0.125483 Hz  
AQ 3.9846387 sec  
RG 71.8  
DW 60.800 usec  
DE 6.50 usec  
TE 303.0 K  
D1 1.0000000 sec  
TD0 1

----- CHANNEL f1 -----  
NUC1 1H  
P1 12.50 usec  
PL1 1.00 dB  
PL1W 11.97157383 W  
SFO1 400.1324710 MHz  
SI 32768  
SF 400.1300114 MHz  
WDW no  
SSB 0  
LB 0.00 Hz  
GB 0  
PC 1.00

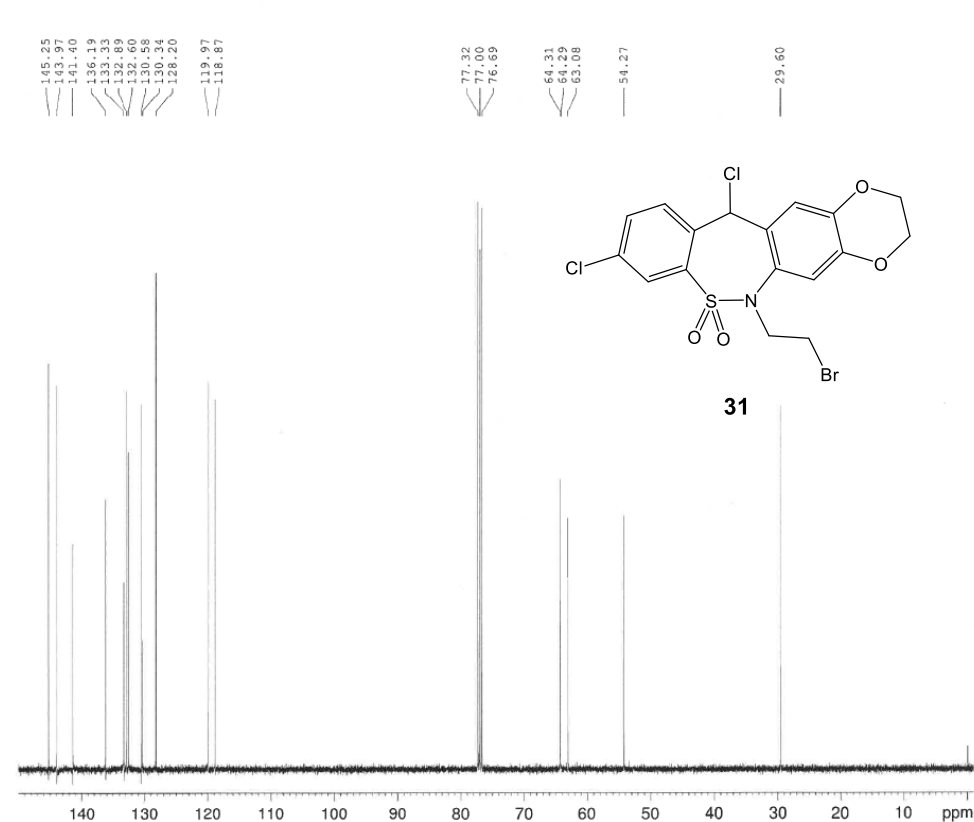

Standard 13C  
85354  
2364-BGE  
Berez Gabor  
2010.03.18. (BB)

NAME 85354  
EXPNO 2  
PROCNO 1  
Date\_ 20100318  
Time 15.28  
INSTRUM spect  
PROBHD 5 mm PABBO BB-  
PULPROG zgpg30  
TD 65536  
SOLVENT CDC13  
NS 1024  
DS 4  
SWH 24038.461 Hz  
FIDRES 0.366798 Hz  
AQ 1.3631988 sec  
RG 2050  
DW 20.800 usec  
DE 6.50 usec  
TE 303.0 K  
D1 2.0000000 sec  
D11 0.0300000 sec  
TD0 1

----- CHANNEL f1 -----  
NUC1 13C  
P1 9.50 usec  
PL1 1.80 dB  
PL1W 40.49391937 W  
SFO1 100.6228298 MHz

----- CHANNEL f2 -----  
CPDPRG2 waltz16  
NUC2 1H  
PCPD2 90.00 usec  
PL2 2.00 dB  
PL12 20.00 dB  
PL13 20.00 dB  
PL2W 9.50935936 W  
PL12W 0.15071319 W  
PL13W 0.15071319 W  
SFO2 400.1316005 MHz  
SI 32768  
SF 100.6127744 MHz  
WDW no  
SSB 0  
LB 0.00 Hz  
GB 0  
PC 1.40

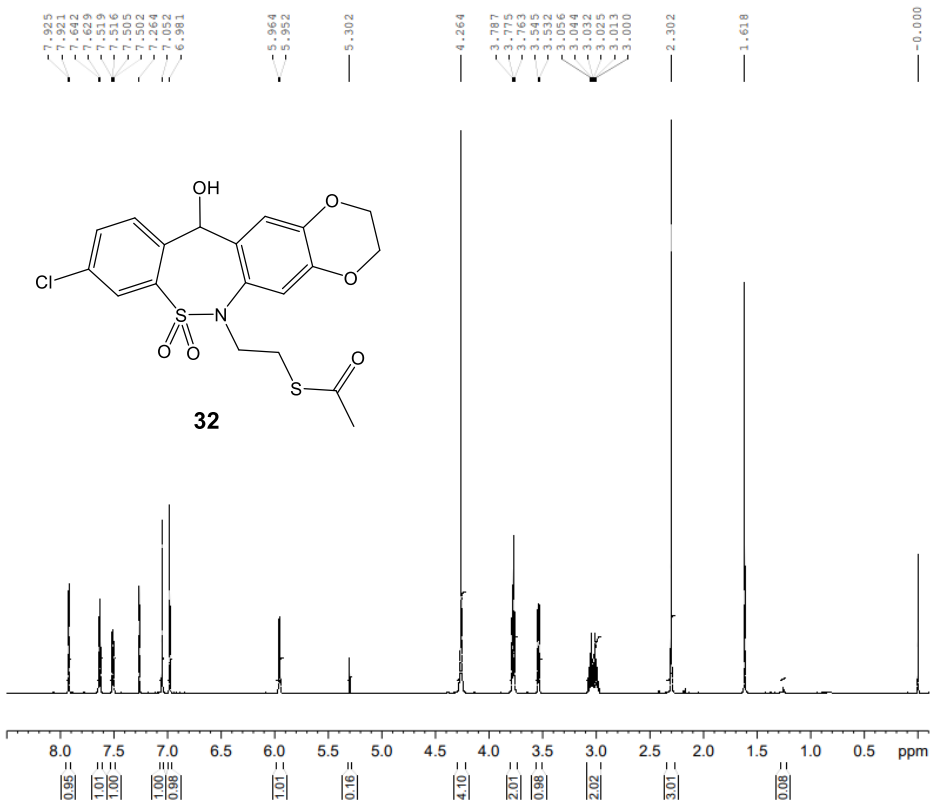

Standard 1H  
143408  
BEG0700\_1A  
Berez Gabor  
2024.09.02. (KP)

Current Data Parameters  
NAME 143408  
EXPNO 11  
PROCNO 1

F2 - Acquisition Parameters  
Date\_ 20240902  
Time\_ 17.48 h  
INSTRUM spect  
PROBHD Z145856\_0002 ( )  
PULPROG zg30  
TD 65536  
SOLVENT CDCl3  
NS 16  
DS 2  
SWH 12019.230 Hz  
FIDRES 0.366798 Hz  
AQ 2.7262976 sec  
RG 196.07  
DW 41.600 usec  
DE 25.00 usec  
TE 295.0 K  
D1 1.00000000 sec  
TD0 1  
SFO1 600.0037050 MHz  
NUC1 1H  
P1 11.50 usec  
PLW1 28.00000000 W

F2 - Processing parameters  
SI 65536  
SF 600.0000127 MHz  
WDW EM  
SSB 0  
LB 0.30 Hz  
GB 0  
PC 1.00

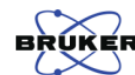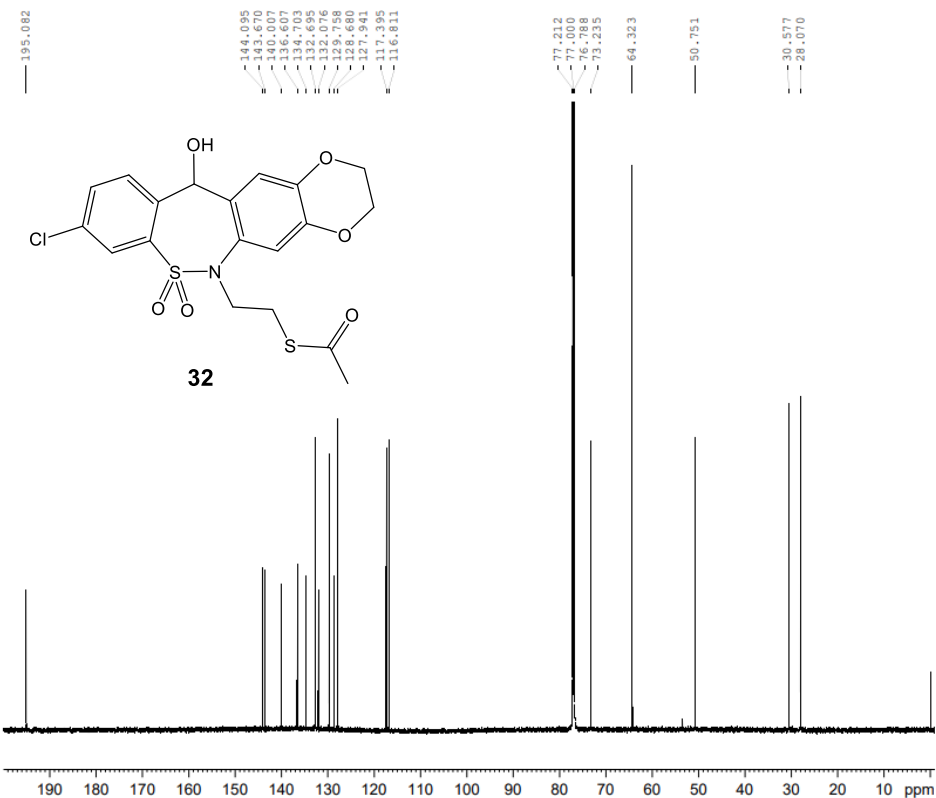

Standard 13C  
143408  
BEG0700\_1A  
Berez Gabor  
2024.09.02. (KP)

Current Data Parameters  
NAME 143408  
EXPNO 12  
PROCNO 1

F2 - Acquisition Parameters  
Date\_ 20240902  
Time\_ 18.57 h  
INSTRUM spect  
PROBHD Z145856\_0002 ( )  
PULPROG zgpg30  
TD 65536  
SOLVENT CDCl3  
NS 2048  
DS 4  
SWH 36231.883 Hz  
FIDRES 1.105709 Hz  
AQ 0.9043968 sec  
RG 196.07  
DW 13.800 usec  
DE 18.00 usec  
TE 295.0 K  
D1 1.00000000 sec  
D11 0.03000000 sec  
TD0 1  
SFO1 150.8852070 MHz  
NUC1 13C  
P1 9.90 usec  
PLW1 71.00000000 W  
SFO2 600.0024000 MHz  
NUC2 1H  
CPDPRG2 waltz16  
PCPD2 80.00 usec  
PLW2 32.90000153 W  
PLW12 0.70370001 W  
PLW13 0.35339001 W

F2 - Processing parameters  
SI 131072  
SF 150.8701271 MHz  
WDW EM  
SSB 0  
LB 1.00 Hz  
GB 0  
PC 1.40

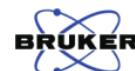

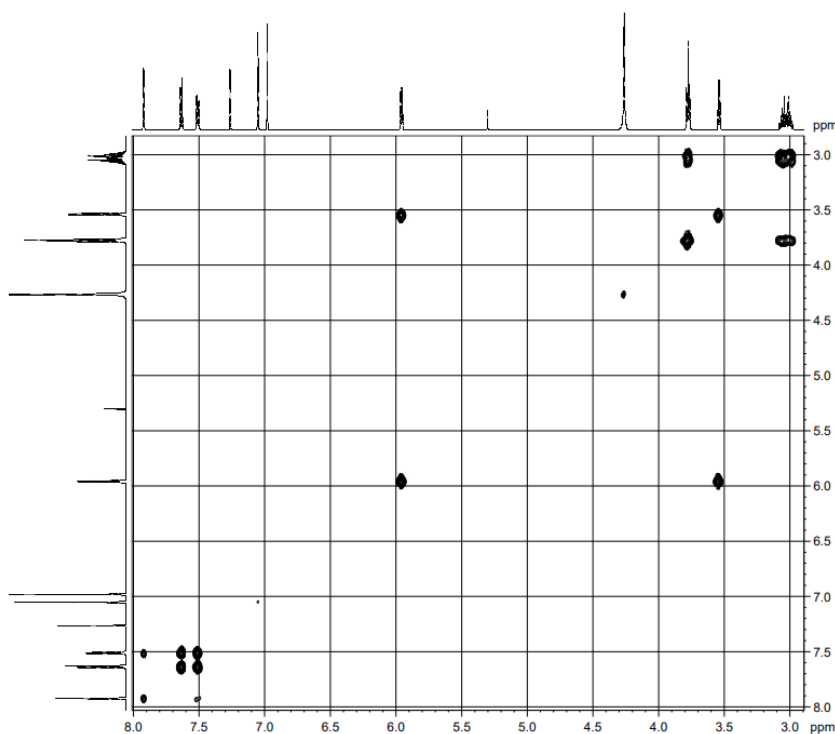

COSY  
143408  
BEG0700 1A  
Berecz Gabor  
2024.09.02. (KP)

32

Current Data Parameters  
NAME 143408  
EXPNO 1  
PROCNO 1

F2 - Acquisition Parameters  
Date\_ 20240902  
Time 18.58 h  
INSTRUM spect  
PROBHD 1H5MM QNP1 (1  
PULPROG zgpg30  
TD 32768  
SOLVENT CDCl3  
NS 4  
DS 2  
SWH 7812.350 Hz  
FIDRES 7.429390 Hz  
AQ 0.1310730 sec  
RG 186.07  
CW 64.000 usec  
DE 29.00 usec  
TE 300.2 K  
DQ 0.0000000 sec  
DI 2.0000000 sec  
DIL 0.0000000 sec  
DLE 0.0000000 sec  
DM 0.0000000 sec  
DNU 0.0000000 sec  
DPC1 600.000000 MHz  
DPC2 11.20 usec  
P1 11.20 usec  
P2 29.0000000 W  
PCPM1(1) SMO10:100  
PCPM1(2) SMO10:100  
PCPM1(3) SMO10:100  
PCPM1(4) SMO10:100  
PCPM1(5) SMO10:100  
PCPM1(6) SMO10:100  
PCPM1(7) SMO10:100  
PCPM1(8) SMO10:100  
PCPM1(9) SMO10:100  
PCPM1(10) SMO10:100  
PCPM1(11) SMO10:100  
PCPM1(12) SMO10:100  
PCPM1(13) SMO10:100  
PCPM1(14) SMO10:100  
PCPM1(15) SMO10:100  
PCPM1(16) SMO10:100  
PCPM1(17) SMO10:100  
PCPM1(18) SMO10:100  
PCPM1(19) SMO10:100  
PCPM1(20) SMO10:100  
PCPM1(21) SMO10:100  
PCPM1(22) SMO10:100  
PCPM1(23) SMO10:100  
PCPM1(24) SMO10:100  
PCPM1(25) SMO10:100  
PCPM1(26) SMO10:100  
PCPM1(27) SMO10:100  
PCPM1(28) SMO10:100  
PCPM1(29) SMO10:100  
PCPM1(30) SMO10:100  
PCPM1(31) SMO10:100  
PCPM1(32) SMO10:100  
PCPM1(33) SMO10:100  
PCPM1(34) SMO10:100  
PCPM1(35) SMO10:100  
PCPM1(36) SMO10:100  
PCPM1(37) SMO10:100  
PCPM1(38) SMO10:100  
PCPM1(39) SMO10:100  
PCPM1(40) SMO10:100  
PCPM1(41) SMO10:100  
PCPM1(42) SMO10:100  
PCPM1(43) SMO10:100  
PCPM1(44) SMO10:100  
PCPM1(45) SMO10:100  
PCPM1(46) SMO10:100  
PCPM1(47) SMO10:100  
PCPM1(48) SMO10:100  
PCPM1(49) SMO10:100  
PCPM1(50) SMO10:100  
PCPM1(51) SMO10:100  
PCPM1(52) SMO10:100  
PCPM1(53) SMO10:100  
PCPM1(54) SMO10:100  
PCPM1(55) SMO10:100  
PCPM1(56) SMO10:100  
PCPM1(57) SMO10:100  
PCPM1(58) SMO10:100  
PCPM1(59) SMO10:100  
PCPM1(60) SMO10:100  
PCPM1(61) SMO10:100  
PCPM1(62) SMO10:100  
PCPM1(63) SMO10:100  
PCPM1(64) SMO10:100  
PCPM1(65) SMO10:100  
PCPM1(66) SMO10:100  
PCPM1(67) SMO10:100  
PCPM1(68) SMO10:100  
PCPM1(69) SMO10:100  
PCPM1(70) SMO10:100  
PCPM1(71) SMO10:100  
PCPM1(72) SMO10:100  
PCPM1(73) SMO10:100  
PCPM1(74) SMO10:100  
PCPM1(75) SMO10:100  
PCPM1(76) SMO10:100  
PCPM1(77) SMO10:100  
PCPM1(78) SMO10:100  
PCPM1(79) SMO10:100  
PCPM1(80) SMO10:100  
PCPM1(81) SMO10:100  
PCPM1(82) SMO10:100  
PCPM1(83) SMO10:100  
PCPM1(84) SMO10:100  
PCPM1(85) SMO10:100  
PCPM1(86) SMO10:100  
PCPM1(87) SMO10:100  
PCPM1(88) SMO10:100  
PCPM1(89) SMO10:100  
PCPM1(90) SMO10:100  
PCPM1(91) SMO10:100  
PCPM1(92) SMO10:100  
PCPM1(93) SMO10:100  
PCPM1(94) SMO10:100  
PCPM1(95) SMO10:100  
PCPM1(96) SMO10:100  
PCPM1(97) SMO10:100  
PCPM1(98) SMO10:100  
PCPM1(99) SMO10:100  
PCPM1(100) SMO10:100

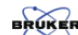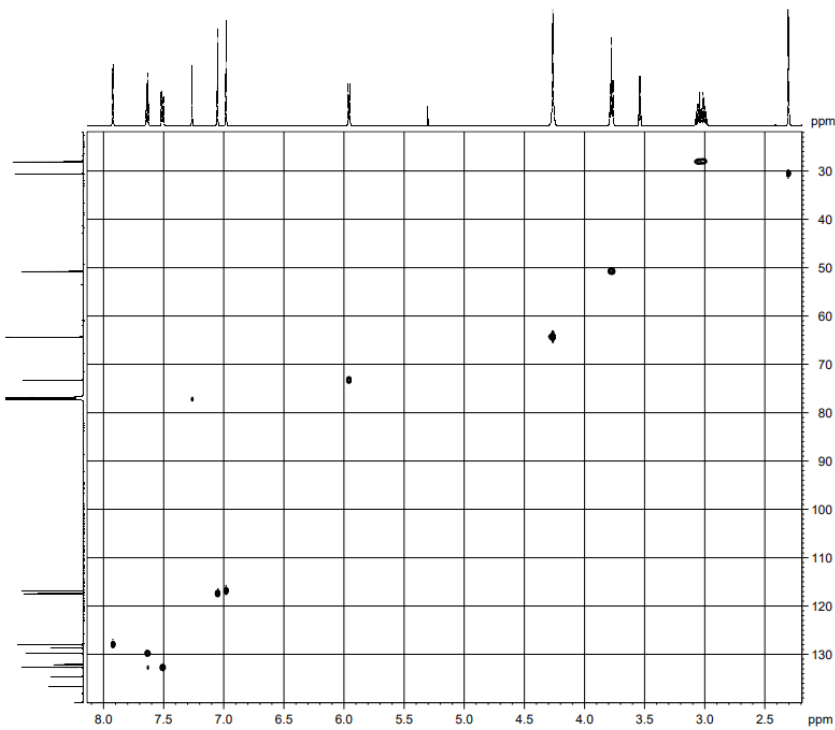

HSQC (140Hz)  
143408  
BEG0700 1A  
Berecz Gabor  
2024.09.02. (KP)

32

Current Data Parameters  
NAME 143408  
EXPNO 24  
PROCNO 1

F2 - Acquisition Parameters  
Date\_ 20240902  
Time 18.58 h  
INSTRUM spect  
PROBHD 1H5MM QNP1 (1  
PULPROG zgpg30  
TD 32768  
SOLVENT CDCl3  
NS 4  
DS 2  
SWH 7812.350 Hz  
FIDRES 7.429390 Hz  
AQ 0.1310730 sec  
RG 186.07  
CW 64.000 usec  
DE 29.00 usec  
TE 300.2 K  
DQ 0.0000000 sec  
DI 2.0000000 sec  
DIL 0.0000000 sec  
DLE 0.0000000 sec  
DM 0.0000000 sec  
DNU 0.0000000 sec  
DPC1 600.000000 MHz  
DPC2 11.20 usec  
P1 11.20 usec  
P2 29.0000000 W  
PCPM1(1) SMO10:100  
PCPM1(2) SMO10:100  
PCPM1(3) SMO10:100  
PCPM1(4) SMO10:100  
PCPM1(5) SMO10:100  
PCPM1(6) SMO10:100  
PCPM1(7) SMO10:100  
PCPM1(8) SMO10:100  
PCPM1(9) SMO10:100  
PCPM1(10) SMO10:100  
PCPM1(11) SMO10:100  
PCPM1(12) SMO10:100  
PCPM1(13) SMO10:100  
PCPM1(14) SMO10:100  
PCPM1(15) SMO10:100  
PCPM1(16) SMO10:100  
PCPM1(17) SMO10:100  
PCPM1(18) SMO10:100  
PCPM1(19) SMO10:100  
PCPM1(20) SMO10:100  
PCPM1(21) SMO10:100  
PCPM1(22) SMO10:100  
PCPM1(23) SMO10:100  
PCPM1(24) SMO10:100  
PCPM1(25) SMO10:100  
PCPM1(26) SMO10:100  
PCPM1(27) SMO10:100  
PCPM1(28) SMO10:100  
PCPM1(29) SMO10:100  
PCPM1(30) SMO10:100  
PCPM1(31) SMO10:100  
PCPM1(32) SMO10:100  
PCPM1(33) SMO10:100  
PCPM1(34) SMO10:100  
PCPM1(35) SMO10:100  
PCPM1(36) SMO10:100  
PCPM1(37) SMO10:100  
PCPM1(38) SMO10:100  
PCPM1(39) SMO10:100  
PCPM1(40) SMO10:100  
PCPM1(41) SMO10:100  
PCPM1(42) SMO10:100  
PCPM1(43) SMO10:100  
PCPM1(44) SMO10:100  
PCPM1(45) SMO10:100  
PCPM1(46) SMO10:100  
PCPM1(47) SMO10:100  
PCPM1(48) SMO10:100  
PCPM1(49) SMO10:100  
PCPM1(50) SMO10:100  
PCPM1(51) SMO10:100  
PCPM1(52) SMO10:100  
PCPM1(53) SMO10:100  
PCPM1(54) SMO10:100  
PCPM1(55) SMO10:100  
PCPM1(56) SMO10:100  
PCPM1(57) SMO10:100  
PCPM1(58) SMO10:100  
PCPM1(59) SMO10:100  
PCPM1(60) SMO10:100  
PCPM1(61) SMO10:100  
PCPM1(62) SMO10:100  
PCPM1(63) SMO10:100  
PCPM1(64) SMO10:100  
PCPM1(65) SMO10:100  
PCPM1(66) SMO10:100  
PCPM1(67) SMO10:100  
PCPM1(68) SMO10:100  
PCPM1(69) SMO10:100  
PCPM1(70) SMO10:100  
PCPM1(71) SMO10:100  
PCPM1(72) SMO10:100  
PCPM1(73) SMO10:100  
PCPM1(74) SMO10:100  
PCPM1(75) SMO10:100  
PCPM1(76) SMO10:100  
PCPM1(77) SMO10:100  
PCPM1(78) SMO10:100  
PCPM1(79) SMO10:100  
PCPM1(80) SMO10:100  
PCPM1(81) SMO10:100  
PCPM1(82) SMO10:100  
PCPM1(83) SMO10:100  
PCPM1(84) SMO10:100  
PCPM1(85) SMO10:100  
PCPM1(86) SMO10:100  
PCPM1(87) SMO10:100  
PCPM1(88) SMO10:100  
PCPM1(89) SMO10:100  
PCPM1(90) SMO10:100  
PCPM1(91) SMO10:100  
PCPM1(92) SMO10:100  
PCPM1(93) SMO10:100  
PCPM1(94) SMO10:100  
PCPM1(95) SMO10:100  
PCPM1(96) SMO10:100  
PCPM1(97) SMO10:100  
PCPM1(98) SMO10:100  
PCPM1(99) SMO10:100  
PCPM1(100) SMO10:100

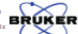



STANDARD 1H  
65409  
2007-BGE  
Berez Gabor  
2006.09.20. (BT)  
Solvent: DMSO  
Temp. 25.0 C / 298.1 K  
INOVA-500 "1500"  
PULSE SEQUENCE  
Relax. delay 3.000 sec  
Pulse 6.4 usec  
Acq. time 5.000 sec  
Width 8000.0 Hz  
16 repetitions  
OBSERVE H1, 499.5268312 MHz  
DATA PROCESSING  
FT size 131072  
Total time 2 minutes

| INDEX | FREQUENCY | PPM    | HEIGHT |
|-------|-----------|--------|--------|
| 1     | 5182.129  | 10.374 | 2.9    |
| 2     | 3937.378  | 7.882  | 32.4   |
| 3     | 3934.448  | 7.876  | 9.5    |
| 4     | 3931.152  | 7.870  | 8.6    |
| 5     | 3928.223  | 7.864  | 40.0   |
| 6     | 3855.489  | 7.718  | 23.5   |
| 7     | 3853.271  | 7.714  | 41.0   |
| 8     | 3848.999  | 7.705  | 57.1   |
| 9     | 3846.802  | 7.701  | 98.1   |
| 10    | 3844.116  | 7.696  | 10.1   |
| 11    | 3544.922  | 7.097  | 87.3   |
| 12    | 3350.342  | 6.707  | 122.4  |
| 13    | 3331.787  | 6.670  | 2.6    |
| 14    | 3330.200  | 6.667  | 3.1    |
| 15    | 3324.219  | 6.655  | 3.1    |
| 16    | 3315.874  | 6.638  | 4.0    |
| 17    | 3243.774  | 6.494  | 51.4   |
| 18    | 2117.432  | 4.238  | 5.1    |
| 19    | 2110.596  | 4.225  | 13.9   |
| 20    | 2103.271  | 4.211  | 140.5  |
| 21    | 2095.703  | 4.195  | 14.0   |
| 22    | 2088.989  | 4.182  | 4.6    |
| 23    | 2084.473  | 4.175  | 2.9    |
| 24    | 1696.899  | 3.397  | 5.4    |
| 25    | 1689.819  | 3.385  | 16.5   |
| 26    | 1682.861  | 3.369  | 20.1   |
| 27    | 1675.903  | 3.355  | 6.6    |
| 28    | 1256.226  | 2.515  | 3.7    |
| 29    | 1254.639  | 2.512  | 7.6    |
| 30    | 1252.808  | 2.508  | 10.1   |
| 31    | 1250.977  | 2.504  | 7.1    |
| 32    | 1249.268  | 2.501  | 3.2    |
| 33    | 1038.656  | 2.079  | 4.7    |
| 34    | 551.880   | 1.105  | 10.9   |
| 35    | 544.922   | 1.091  | 21.5   |
| 36    | 537.842   | 1.077  | 10.5   |
| 37    | -0.000    | -0.000 | 4.5    |

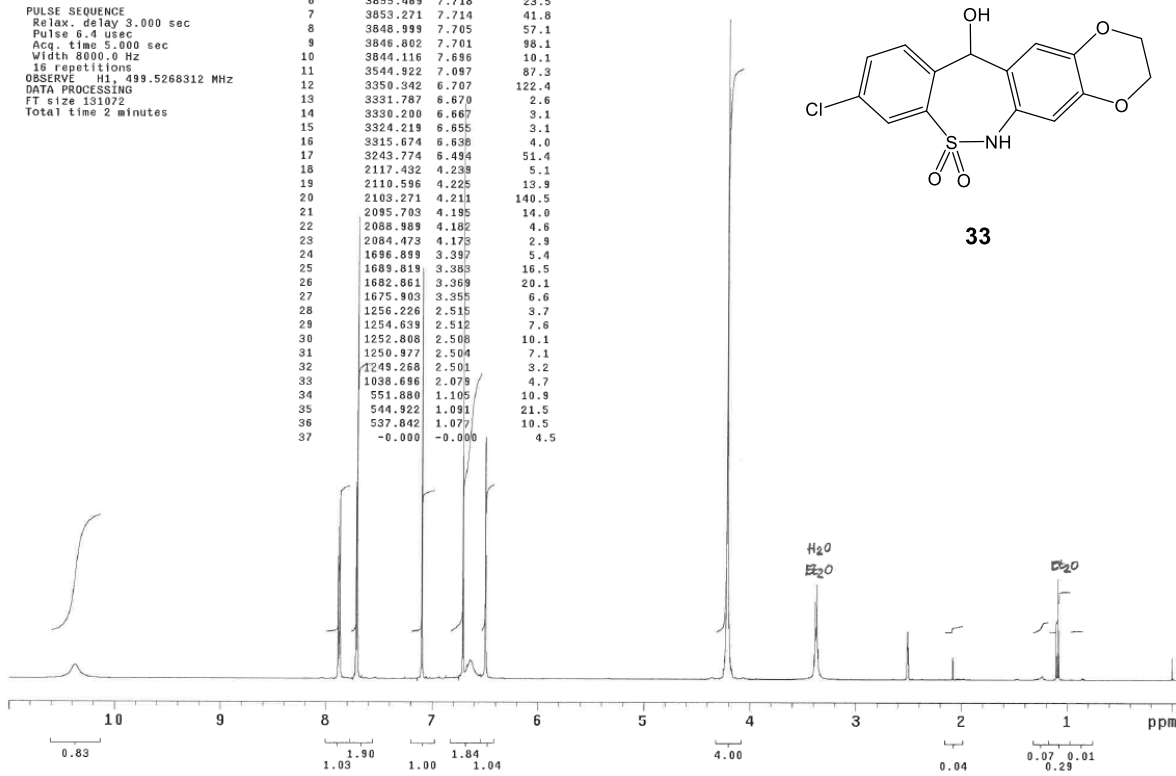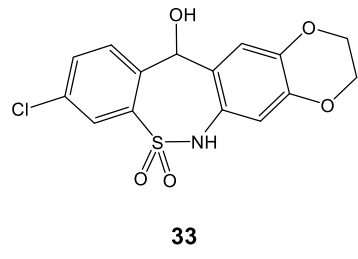

STANDARD 13C  
65409  
2007-BGE  
Berez Gabor  
2006.09.20. (BT)  
Solvent: DMSO  
Temp. 25.0 C / 298.1 K  
User: 1-14-07  
INOVA-500 "1500"  
PULSE SEQUENCE  
Relax. delay 3.000 sec  
Pulse 6.0 usec  
Acq. time 1.300 sec  
Width 32000.0 Hz  
784 repetitions  
OBSERVE C13, 125.6061553 MHz  
DECOUPLE H1, 499.5283374 MHz  
Power 32 dB  
continuously on  
WALTZ-16 modulated  
DATA PROCESSING  
Line broadening 0.5 Hz  
FT size 131072  
Total time 56 minutes

| INDEX | FREQUENCY | PPM     | HEIGHT |
|-------|-----------|---------|--------|
| 1     | 17926.704 | 142.716 | 78.1   |
| 2     | 17869.087 | 142.257 | 72.7   |
| 3     | 17548.774 | 139.707 | 78.1   |
| 4     | 17511.176 | 139.408 | 66.7   |
| 5     | 16657.172 | 132.609 | 72.1   |
| 6     | 16633.247 | 132.419 | 72.3   |
| 7     | 16589.790 | 132.073 | 69.8   |
| 8     | 16007.758 | 127.439 | 70.3   |
| 9     | 15779.872 | 125.577 | 72.6   |
| 10    | 15735.297 | 125.270 | 77.3   |
| 11    | 14452.583 | 115.858 | 71.2   |
| 12    | 14274.360 | 113.639 | 74.1   |
| 13    | 8264.594  | 65.795  | 74.7   |
| 14    | 8179.145  | 65.115  | 11.2   |
| 15    | 8079.536  | 64.322  | 73.1   |
| 16    | 8077.583  | 64.306  | 73.9   |
| 17    | 5058.239  | 40.265  | 27.4   |
| 18    | 5028.755  | 40.034  | 84.8   |
| 19    | 5019.477  | 39.960  | 7.8    |
| 20    | 5007.758  | 39.867  | 189.8  |
| 21    | 4986.762  | 39.700  | 200.0  |
| 22    | 4965.766  | 39.533  | 170.2  |
| 23    | 4944.770  | 39.366  | 85.5   |
| 24    | 4924.262  | 39.202  | 27.8   |
| 25    | 1929.145  | 15.358  | 11.8   |

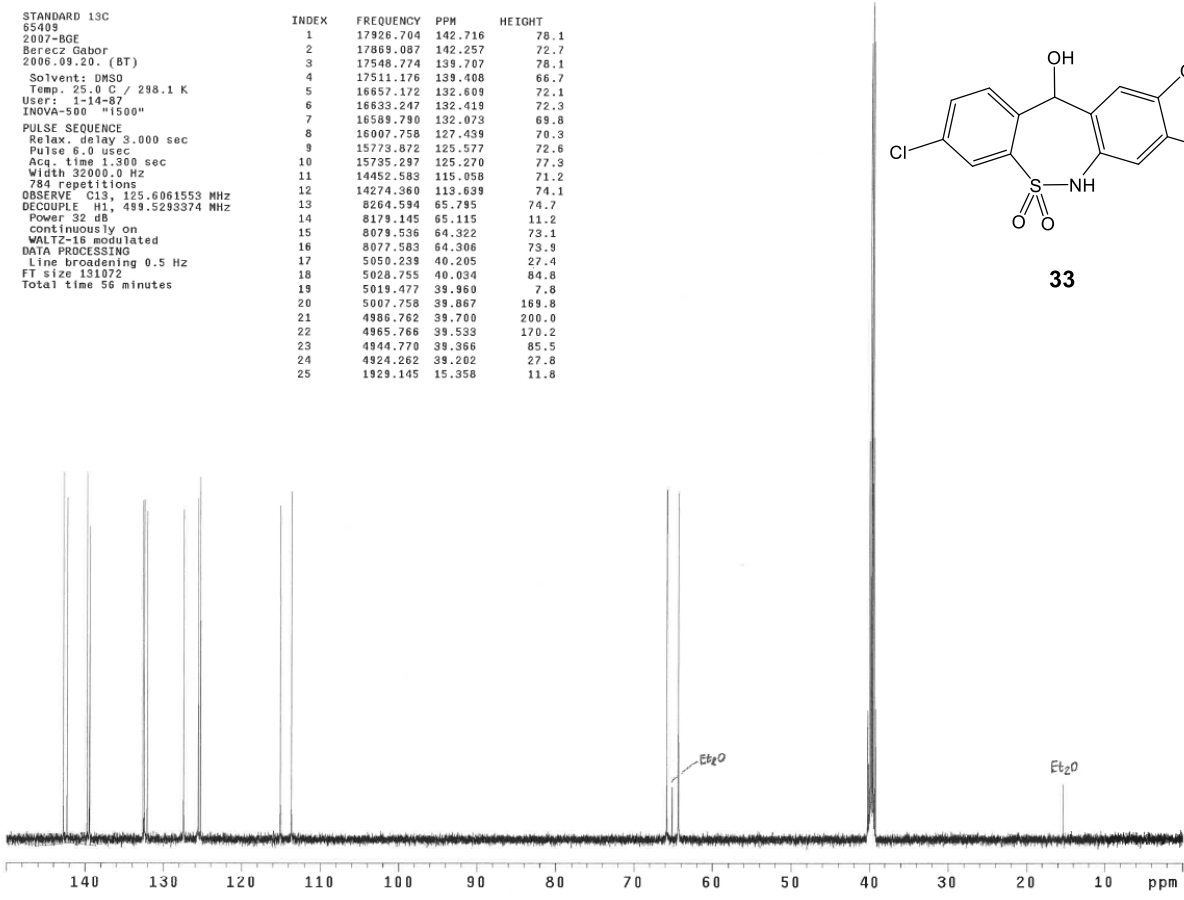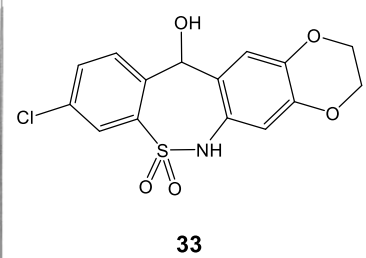

| STANDARD 1H                 | INDEX | FREQUENCY | PPM    | HEIGHT |
|-----------------------------|-------|-----------|--------|--------|
| 67203                       | 1     | 3954.712  | 7.917  | 24.4   |
| 2039-BGE                    | 2     | 3952.515  | 7.913  | 24.8   |
| Berez Gabor                 | 3     | 3731.934  | 7.471  | 13.1   |
| 2007.01.16. (BB)            | 4     | 3729.736  | 7.467  | 12.7   |
| Solvent: CDCl3              | 5     | 3723.833  | 7.454  | 18.4   |
| Temp. 25.0 C / 298.1 K      | 6     | 3721.456  | 7.450  | 17.8   |
| INOVA-500 "1500"            | 7     | 3682.251  | 7.372  | 25.1   |
| PULSE SEQUENCE              | 8     | 3673.828  | 7.355  | 18.0   |
| Relax. delay 1.000 sec      | 9     | 3626.831  | 7.261  | 12.8   |
| Pulse 6.4 usec              | 10    | 3612.793  | 7.232  | 15.6   |
| Acq. time 5.000 sec         | 11    | 3534.058  | 7.075  | 42.1   |
| Width 8000.0 Hz             | 12    | 3435.791  | 6.878  | 49.3   |
| 16 repetitions              | 13    | 2927.246  | 5.860  | 32.8   |
| OBSERVE H1, 499.5244692 MHz | 14    | 2845.386  | 5.298  | 111.9  |
| DATA PROCESSING             | 15    | 2126.587  | 4.257  | 27.1   |
| FT size 131072              | 16    | 2129.535  | 4.251  | 42.7   |
| Total time 1 minutes        | 17    | 2119.751  | 4.244  | 24.2   |
|                             | 18    | 2102.173  | 4.208  | 7.0    |
|                             | 19    | -0.000    | -0.000 | 15.2   |

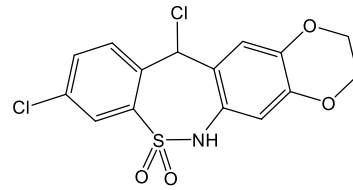

34

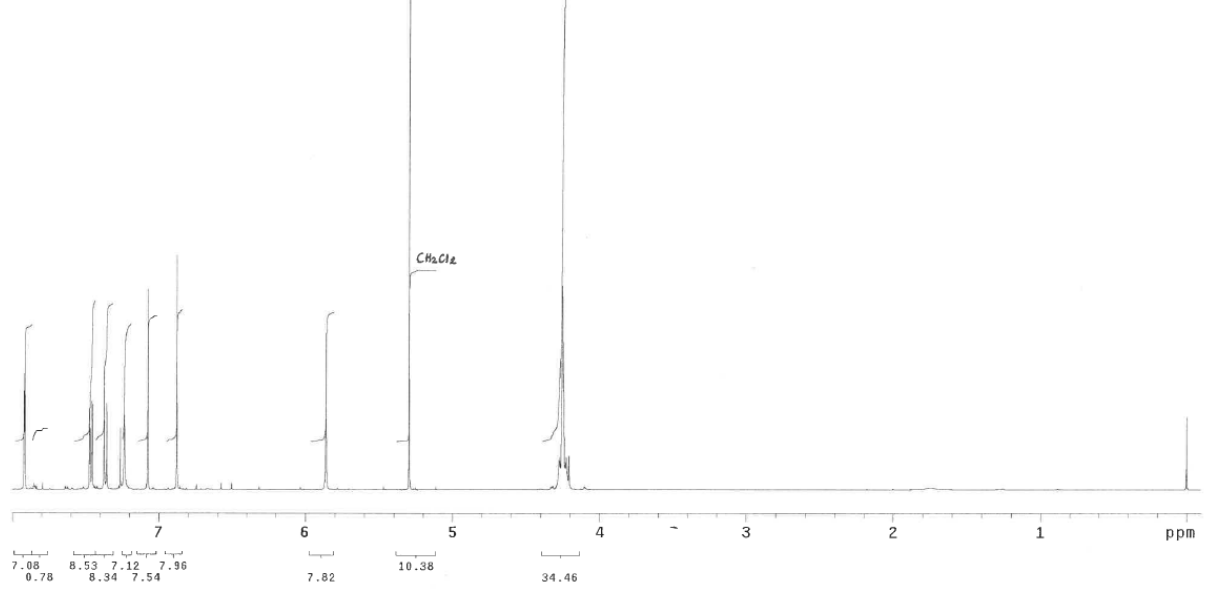

| STANDARD 13C                 | INDEX | FREQUENCY | PPM     | HEIGHT |
|------------------------------|-------|-----------|---------|--------|
| 67203                        | 1     | 18238.964 | 145.133 | 22.9   |
| 2039-BGE                     | 2     | 18063.484 | 143.800 | 33.4   |
| Berez Gabor                  | 3     | 17827.644 | 141.923 | 25.1   |
| 2007.01.16. (BB)             | 4     | 17187.019 | 136.823 | 27.2   |
| Solvent: CDCl3               | 5     | 16753.914 | 133.375 | 29.9   |
| Temp. 25.0 C / 298.1 K       | 6     | 16643.074 | 132.493 | 72.3   |
| USER: 1-14-0/                | 7     | 16555.183 | 131.793 | 59.1   |
| INOVA-500 "1500"             | 8     | 16425.739 | 130.763 | 33.6   |
| PULSE SEQUENCE               | 9     | 16212.410 | 129.064 | 75.4   |
| Relax. delay 3.000 sec       | 10    | 15853.523 | 126.207 | 27.2   |
| Pulse 6.0 usec               | 11    | 15236.824 | 121.288 | 61.7   |
| Acq. time 1.300 sec          | 12    | 14778.816 | 117.651 | 70.7   |
| Width 32000.0 Hz             | 13    | 9704.597  | 77.257  | 158.1  |
| 132 repetitions              | 14    | 9672.371  | 77.000  | 161.9  |
| OBSERVE C13, 125.6055308 MHz | 15    | 9640.632  | 76.747  | 158.0  |
| DECOUPLE H1, 499.5269647 MHz | 16    | 8076.668  | 64.297  | 76.3   |
| Power 32 dB                  | 17    | 8069.832  | 64.242  | 69.7   |
| continuously on              | 18    | 7947.761  | 63.271  | 45.4   |
| WALTZ-16 modulated           | 19    | 6709.480  | 53.413  | 18.4   |
| DATA PROCESSING              |       |           |         |        |
| Line broadening 0.5 Hz       |       |           |         |        |
| FT size 131072               |       |           |         |        |
| Total time 9 minutes         |       |           |         |        |

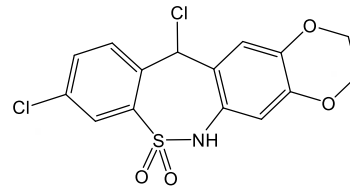

34

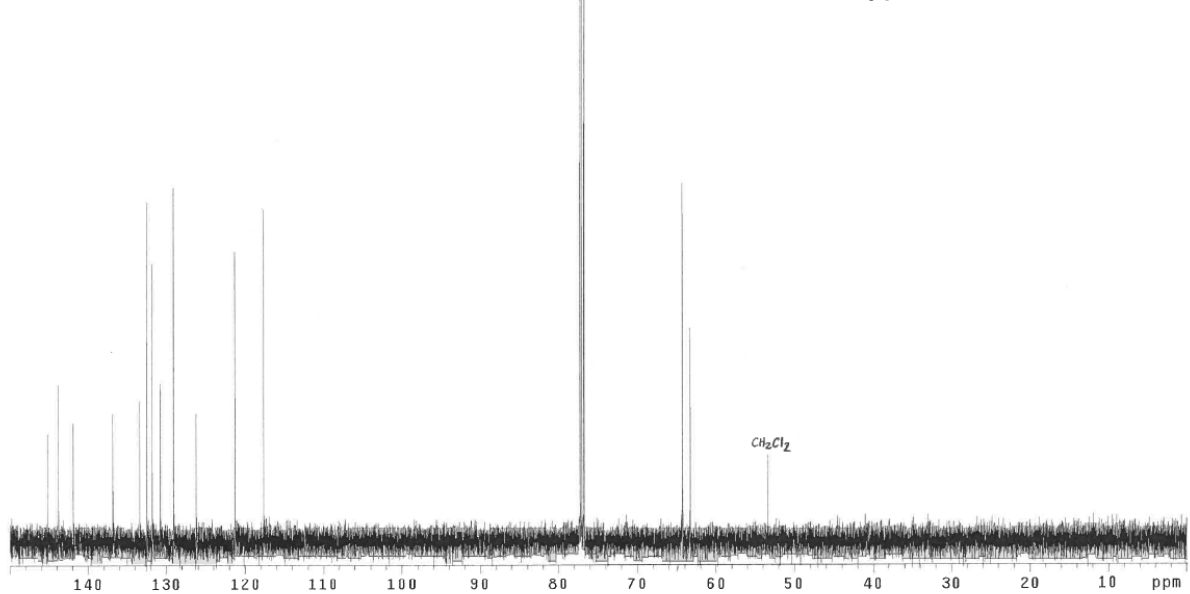

STANDARD 1H  
74813  
2177-BGE  
Berez Gabor  
2008.06.19. (BB)  
Solvent: CDCl3  
Temp. 30.0 C / 303.1 K  
INVA-500 "1500"  
PULSE SEQUENCE  
Relax. delay 1.000 sec  
Pulse 90.0 degrees  
Acq. time 5.000 sec  
Width 8000.0 Hz  
16 repetitions  
OBSERVE H1, 499.5244712 MHz  
DATA PROCESSING  
FT size 131072  
Total time 1 minutes

| INDEX | FREQUENCY | PPM   | HEIGHT | INDEX | FREQUENCY | PPM   | HEIGHT |
|-------|-----------|-------|--------|-------|-----------|-------|--------|
| 1     | 3942.139  | 7.892 | 45.2   | 40    | 1755.127  | 3.514 | 29.8   |
| 2     | 3939.941  | 7.887 | 42.9   | 41    | 1750.732  | 3.505 | 47.4   |
| 3     | 3854.736  | 7.717 | 10.2   | 42    | 1748.657  | 3.501 | 34.6   |
| 4     | 3719.238  | 7.446 | 27.4   | 43    | 1745.850  | 3.495 | 45.1   |
| 5     | 3717.041  | 7.441 | 25.2   | 44    | 1744.019  | 3.491 | 30.1   |
| 6     | 3710.938  | 7.429 | 46.7   | 45    | 1740.356  | 3.484 | 29.2   |
| 7     | 3708.862  | 7.425 | 43.8   | 46    | 1738.619  | 3.473 | 7.1    |
| 8     | 3687.500  | 7.382 | 28.9   | 47    | 1729.614  | 3.463 | 3.4    |
| 9     | 3679.199  | 7.365 | 17.7   | 48    | 802.612   | 1.607 | 5.1    |
| 10    | 3626.343  | 7.260 | 16.7   | 49    | 600.342   | 1.202 | 4.4    |
| 11    | 3500.610  | 7.008 | 47.8   | 50    | 0.000     | 0.000 | 16.3   |
| 12    | 3412.354  | 6.831 | 60.4   |       |           |       |        |
| 13    | 2640.015  | 5.285 | 11.9   |       |           |       |        |
| 14    | 2127.197  | 4.258 | 3.5    |       |           |       |        |
| 15    | 2121.626  | 4.246 | 9.1    |       |           |       |        |
| 16    | 2119.019  | 4.242 | 8.3    |       |           |       |        |
| 17    | 2116.333  | 4.237 | 16.9   |       |           |       |        |
| 18    | 2108.887  | 4.222 | 156.5  |       |           |       |        |
| 19    | 2107.056  | 4.218 | 149.5  |       |           |       |        |
| 20    | 2099.609  | 4.203 | 17.0   |       |           |       |        |
| 21    | 2096.680  | 4.197 | 9.2    |       |           |       |        |
| 22    | 2093.506  | 4.191 | 8.0    |       |           |       |        |
| 23    | 2088.745  | 4.181 | 3.6    |       |           |       |        |
| 24    | 1929.810  | 3.863 | 8.7    |       |           |       |        |
| 25    | 1924.927  | 3.854 | 14.4   |       |           |       |        |
| 26    | 1919.312  | 3.842 | 28.2   |       |           |       |        |
| 27    | 1914.307  | 3.832 | 28.0   |       |           |       |        |
| 28    | 1913.696  | 3.831 | 27.3   |       |           |       |        |
| 29    | 1908.813  | 3.821 | 20.3   |       |           |       |        |
| 30    | 1901.001  | 3.806 | 13.2   |       |           |       |        |
| 31    | 1895.996  | 3.796 | 19.7   |       |           |       |        |
| 32    | 1894.531  | 3.793 | 17.2   |       |           |       |        |
| 33    | 1889.648  | 3.783 | 18.6   |       |           |       |        |
| 34    | 1885.254  | 3.774 | 10.1   |       |           |       |        |
| 35    | 1884.033  | 3.772 | 9.0    |       |           |       |        |
| 36    | 1878.906  | 3.761 | 7.5    |       |           |       |        |
| 37    | 1765.991  | 3.535 | 5.4    |       |           |       |        |
| 38    | 1761.230  | 3.528 | 6.3    |       |           |       |        |
| 39    | 1759.399  | 3.522 | 4.5    |       |           |       |        |

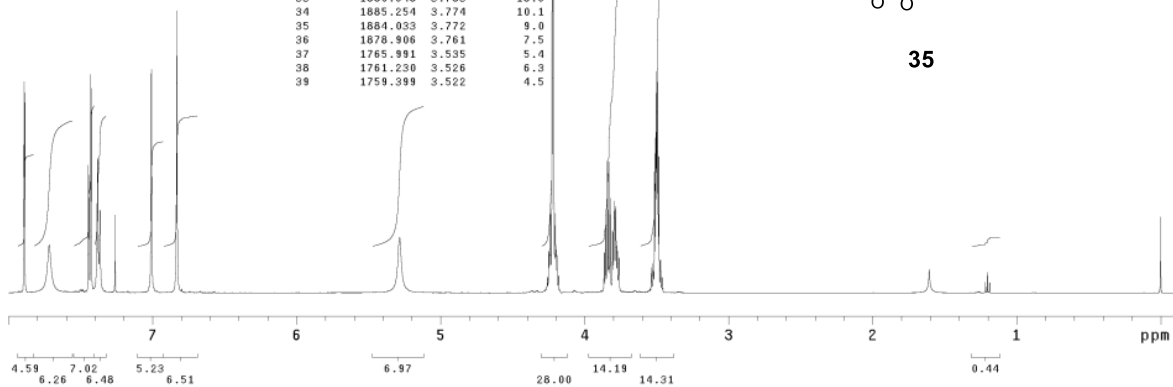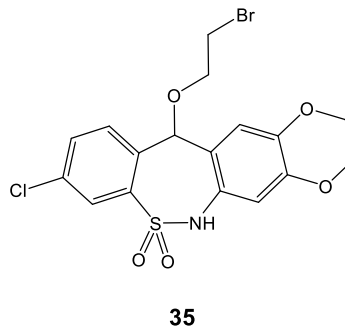

STANDARD 13C  
74813  
2177-BGE  
Berez Gabor  
2008.06.19. (BB)  
Solvent: CDCl3  
Temp. 30.0 C / 303.1 K  
User: 1-14-87  
INVA-500 "1500"  
PULSE SEQUENCE  
Relax. delay 3.000 sec  
Pulse 90.0 degrees  
Acq. time 1.300 sec  
Width 32000.0 Hz  
1858 repetitions  
OBSERVE C13, 125.6055303 MHz  
DECOUPLE H1, 499.5269647 MHz  
Power 34 dB  
continuously on  
WALTZ-16 modulated  
DATA PROCESSING  
Line broadening 0.5 Hz  
FT size 131072  
Total time 118 minutes

| INDEX | FREQUENCY | PPM     | HEIGHT |
|-------|-----------|---------|--------|
| 1     | 18119.148 | 144.243 | 34.9   |
| 2     | 18031.746 | 143.547 | 39.2   |
| 3     | 17852.523 | 142.129 | 4.7    |
| 4     | 17114.285 | 136.244 | 14.3   |
| 5     | 16803.718 | 133.771 | 12.9   |
| 6     | 16583.503 | 132.018 | 115.2  |
| 7     | 16470.710 | 131.120 | 10.8   |
| 8     | 16404.304 | 130.592 | 12.0   |
| 9     | 16208.503 | 129.033 | 39.3   |
| 10    | 15807.136 | 125.838 | 29.1   |
| 11    | 15080.574 | 120.054 | 9.8    |
| 12    | 14684.578 | 116.901 | 23.6   |
| 13    | 11900.886 | 94.741  | -4.3   |
| 14    | 10510.261 | 83.670  | 4.5    |
| 15    | 9704.597  | 77.257  | 86.6   |
| 16    | 9672.371  | 77.000  | 91.2   |
| 17    | 9640.632  | 76.747  | 89.4   |
| 18    | 8701.667  | 69.272  | 78.2   |
| 19    | 8078.132  | 64.309  | 156.3  |
| 20    | 8062.396  | 64.188  | 146.9  |
| 21    | 3832.527  | 30.510  | 115.8  |

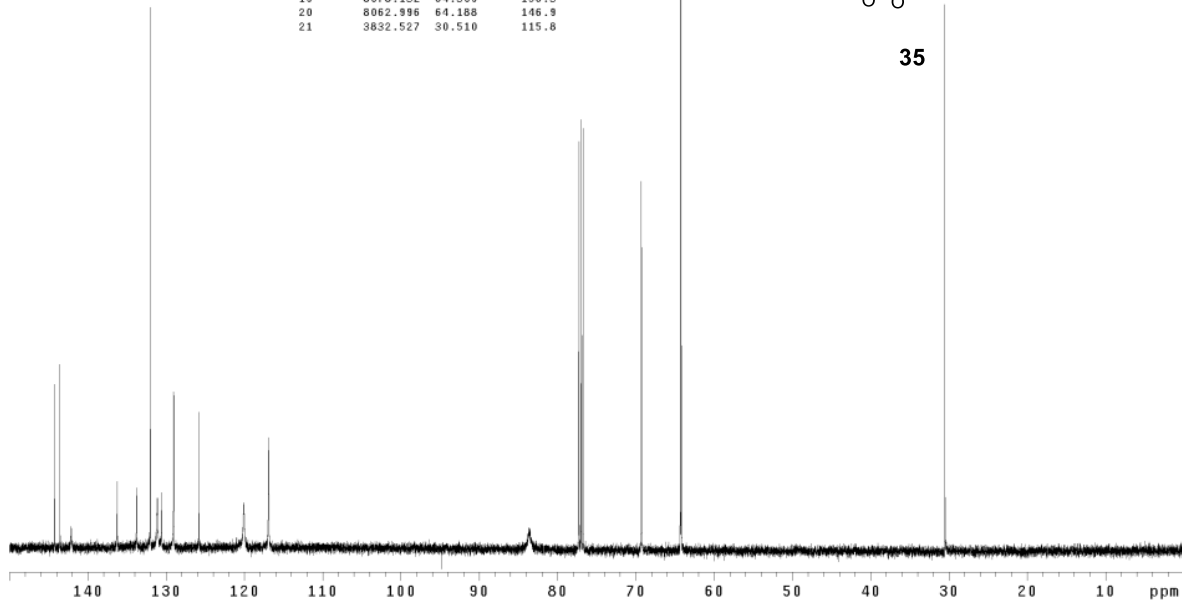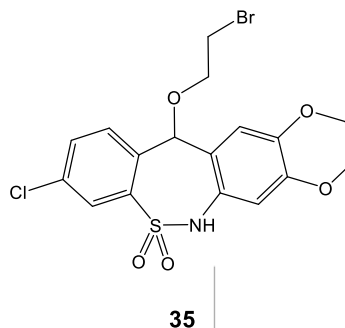

STANDARD 1H  
 85227  
 2000-BGE  
 Berecz Gabor  
 2006.09.06. (SZA)  
 Solvent: DMSO  
 Temp. 25.0 C / 298.1 K  
 INOVA-500 "1500"  
 PULSE SEQUENCE  
 Relax. delay 3.000 sec  
 Pulse 6.4 usec  
 Acq. time 5.000 sec  
 Width 8000.0 Hz  
 15 Repetitions  
 OBSERVE F1, 499.5268346 MHz  
 DATA PROCESSING  
 FT size 131072  
 Total time 2 minutes

| INDEX | FREQUENCY | PPM   | HEIGHT | INDEX | FREQUENCY | PPM   | HEIGHT |
|-------|-----------|-------|--------|-------|-----------|-------|--------|
| 1     | 3883.667  | 7.775 | 27.7   | 40    | 1247.070  | 2.497 | 7.3    |
| 2     | 3881.470  | 7.770 | 30.4   | 41    | 1035.278  | 2.073 | 5.6    |
| 3     | 3841.187  | 7.690 | 17.8   | 42    | 519.653   | 1.040 | 7.4    |
| 4     | 3838.887  | 7.685 | 15.7   | 43    | 513.672   | 1.028 | 7.1    |
| 5     | 3832.886  | 7.673 | 27.7   | 44    | 0.000     | 0.000 | 14.2   |
| 6     | 3830.566  | 7.668 | 25.9   |       |           |       |        |
| 7     | 3804.688  | 7.617 | 30.6   |       |           |       |        |
| 8     | 3796.265  | 7.600 | 19.4   |       |           |       |        |
| 9     | 3496.460  | 7.000 | 27.5   |       |           |       |        |
| 10    | 3487.793  | 6.982 | 42.8   |       |           |       |        |
| 11    | 3458.862  | 6.924 | 62.0   |       |           |       |        |
| 12    | 3450.195  | 6.907 | 41.5   |       |           |       |        |
| 13    | 3106.291  | 6.218 | 25.0   |       |           |       |        |
| 14    | 3101.929  | 6.210 | 30.2   |       |           |       |        |
| 15    | 3071.655  | 6.149 | 21.6   |       |           |       |        |
| 16    | 3067.383  | 6.141 | 17.4   |       |           |       |        |
| 17    | 2171.387  | 4.347 | 6.5    |       |           |       |        |
| 18    | 2168.579  | 4.341 | 7.6    |       |           |       |        |
| 19    | 2166.876  | 4.338 | 10.2   |       |           |       |        |
| 20    | 2164.063  | 4.332 | 11.4   |       |           |       |        |
| 21    | 2161.377  | 4.327 | 8.6    |       |           |       |        |
| 22    | 2159.302  | 4.323 | 5.5    |       |           |       |        |
| 23    | 2158.203  | 4.320 | 7.6    |       |           |       |        |
| 24    | 2155.884  | 4.316 | 9.3    |       |           |       |        |
| 25    | 2147.481  | 4.299 | 6.0    |       |           |       |        |
| 26    | 2144.043  | 4.292 | 6.4    |       |           |       |        |
| 27    | 2135.498  | 4.275 | 10.3   |       |           |       |        |
| 28    | 2133.687  | 4.271 | 6.3    |       |           |       |        |
| 29    | 2132.568  | 4.269 | 8.4    |       |           |       |        |
| 30    | 2130.859  | 4.266 | 10.5   |       |           |       |        |
| 31    | 2129.395  | 4.263 | 10.5   |       |           |       |        |
| 32    | 2128.540  | 4.261 | 10.3   |       |           |       |        |
| 33    | 2125.977  | 4.256 | 9.3    |       |           |       |        |
| 34    | 2124.023  | 4.252 | 7.8    |       |           |       |        |
| 35    | 2120.483  | 4.245 | 5.8    |       |           |       |        |
| 36    | 1701.294  | 3.406 | 184.7  |       |           |       |        |
| 37    | 1662.354  | 3.328 | 81.2   |       |           |       |        |
| 38    | 1250.732  | 2.504 | 7.6    |       |           |       |        |
| 39    | 1248.901  | 2.500 | 10.6   |       |           |       |        |

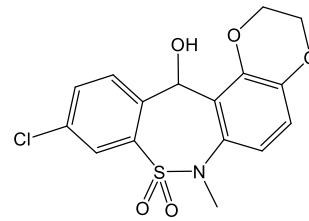

36

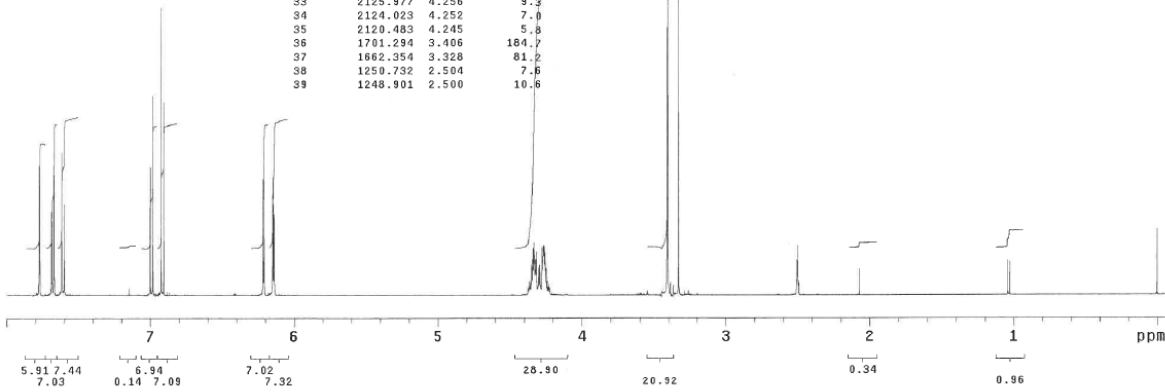

STANDARD 13C  
 85227  
 2000-BGE  
 Berecz Gabor  
 2006.09.06. (SZA)  
 Solvent: DMSO  
 Temp. 25.0 C / 298.1 K  
 User: 1-14-87  
 INOVA-500 "1500"  
 PULSE SEQUENCE  
 Relax. delay 1.200 sec  
 Pulse 6.0 usec  
 Acq. time 1.300 sec  
 Width 32000.0 Hz  
 368 repetitions  
 OBSERVE C13, 125.6061592 MHz  
 DECOUPLE H1, 499.5293374 MHz  
 Power 32 dB  
 continuously on  
 WALTZ-16 modulated  
 DATA PROCESSING  
 Line broadening 1.0 Hz  
 FT size 131072  
 Total time 15 minutes

| INDEX | FREQUENCY | PPM     | HEIGHT |
|-------|-----------|---------|--------|
| 1     | 18025.337 | 143.501 | 27.6   |
| 2     | 17947.212 | 142.879 | 23.0   |
| 3     | 17682.563 | 140.772 | 28.2   |
| 4     | 17168.891 | 136.683 | 30.9   |
| 5     | 16875.923 | 134.351 | 33.5   |
| 6     | 16818.794 | 133.896 | 26.1   |
| 7     | 16600.532 | 132.158 | 40.1   |
| 8     | 16518.012 | 131.501 | 28.8   |
| 9     | 16351.997 | 130.180 | 22.9   |
| 10    | 15943.305 | 126.926 | 41.5   |
| 11    | 15401.313 | 122.611 | 41.1   |
| 12    | 14773.872 | 117.616 | 41.1   |
| 13    | 8389.106  | 66.786  | 45.3   |
| 14    | 8103.462  | 64.512  | 36.9   |
| 15    | 8025.337  | 63.890  | 34.2   |
| 16    | 5115.180  | 40.722  | 44.9   |
| 17    | 5050.238  | 40.205  | 23.5   |
| 18    | 5029.243  | 40.038  | 68.9   |
| 19    | 5007.759  | 39.867  | 137.5  |
| 20    | 4986.762  | 39.700  | 152.0  |
| 21    | 4965.766  | 39.533  | 137.6  |
| 22    | 4944.770  | 39.366  | 69.2   |
| 23    | 4923.774  | 39.199  | 23.1   |

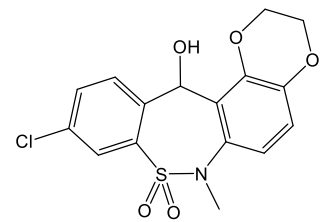

36

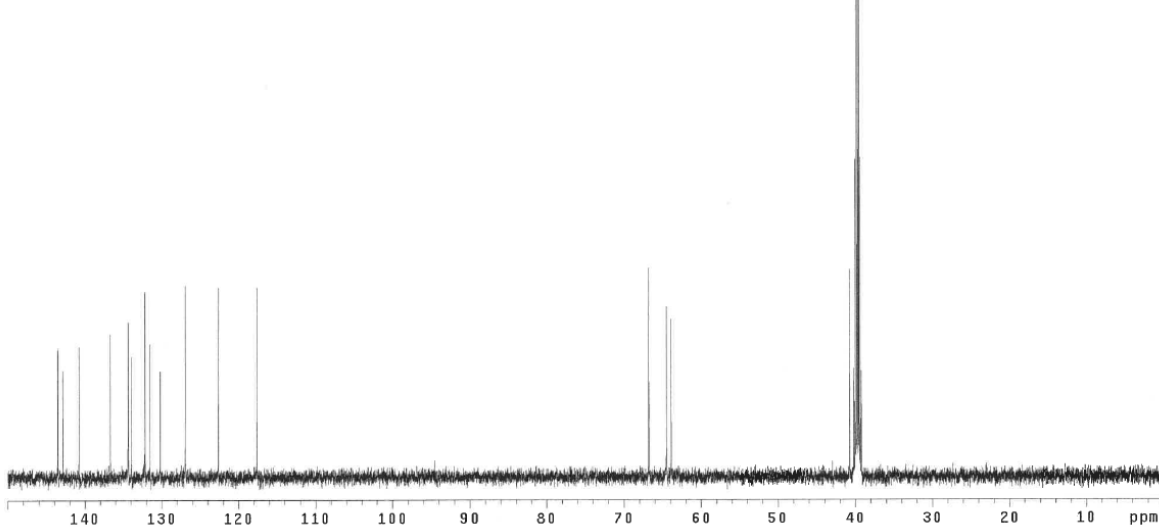



STANDARD 1H  
62897  
1951-BGE  
Berez Gabor  
2006.04.06. (BT)  
Solvent: CDCl3  
Temp. 25.0 C / 298.1 K  
INOVA-500 "1500"  
PULSE SEQUENCE  
Relax. delay 3.000 sec  
Pulse 6.4 usec  
Acq. time 5.000 sec  
Width 8000.0 Hz  
16 repetitions  
OBSERVE H1, 499.5244718 MHz  
DATA PROCESSING  
FT size 131072  
Total time 2 minutes

| INDEX | FREQUENCY | PPM    | HEIGHT |
|-------|-----------|--------|--------|
| 1     | 3981.079  | 7.970  | 13.3   |
| 2     | 3880.835  | 7.969  | 14.5   |
| 3     | 3979.980  | 7.968  | 23.8   |
| 4     | 3978.638  | 7.965  | 13.7   |
| 5     | 3734.131  | 7.475  | 77.8   |
| 6     | 3732.788  | 7.473  | 82.0   |
| 7     | 3625.122  | 7.257  | 12.0   |
| 8     | 3503.296  | 7.013  | 18.6   |
| 9     | 3494.629  | 6.996  | 61.9   |
| 10    | 3481.812  | 6.970  | 41.4   |
| 11    | 3473.145  | 6.953  | 28.2   |
| 12    | 3354.980  | 6.716  | 46.9   |
| 13    | 2642.212  | 5.289  | 75.4   |
| 14    | 2186.035  | 4.376  | 5.9    |
| 15    | 2183.105  | 4.370  | 8.0    |
| 16    | 2180.664  | 4.365  | 9.1    |
| 17    | 2177.368  | 4.359  | 13.0   |
| 18    | 2172.607  | 4.349  | 6.8    |
| 19    | 2168.335  | 4.341  | 6.7    |
| 20    | 2165.894  | 4.336  | 8.7    |
| 21    | 2162.964  | 4.330  | 10.6   |
| 22    | 2150.605  | 4.325  | 12.4   |
| 23    | 2152.222  | 4.309  | 23.2   |
| 24    | 2143.677  | 4.291  | 12.3   |
| 25    | 2141.235  | 4.287  | 9.9    |
| 26    | 2138.550  | 4.281  | 8.5    |
| 27    | 2135.986  | 4.276  | 6.1    |
| 28    | 2126.953  | 4.258  | 6.2    |
| 29    | 2122.314  | 4.249  | 13.3   |
| 30    | 2118.896  | 4.242  | 8.6    |
| 31    | 2116.455  | 4.237  | 7.5    |
| 32    | 2113.403  | 4.231  | 6.2    |
| 33    | 2107.422  | 4.219  | 4.7    |
| 34    | 1769.287  | 3.542  | 151.2  |
| 35    | -0.000    | -0.000 | 13.5   |

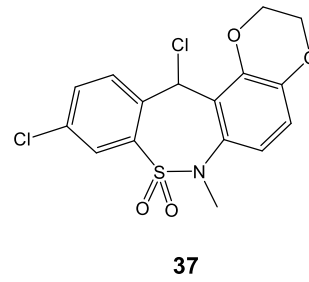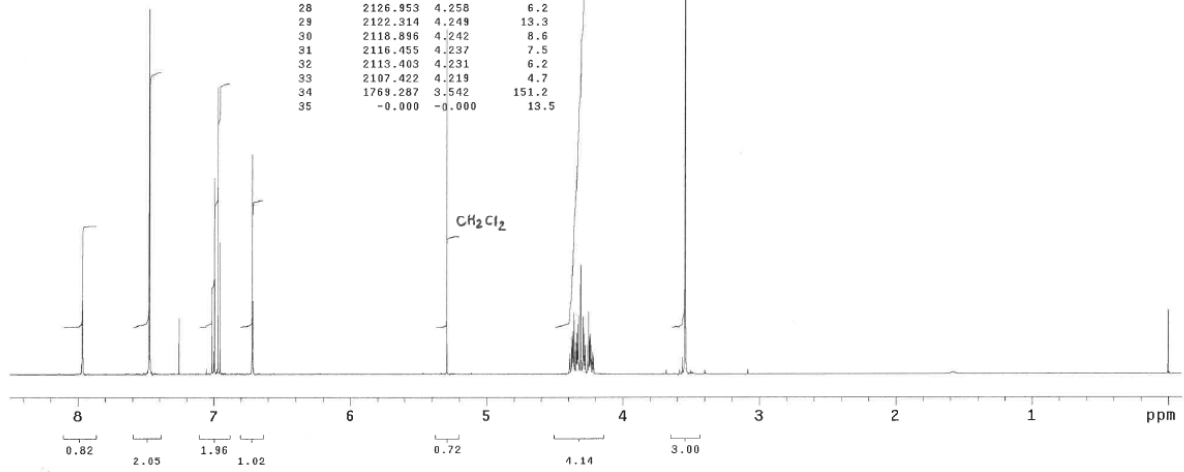

STANDARD 13C  
62897  
1951-BGE  
Berez Gabor  
2006.04.06. (BT)  
Solvent: CDCl3  
Temp. 25.0 C / 298.1 K  
User: 1-14-87  
INOVA-500 "1500"  
PULSE SEQUENCE  
Relax. delay 3.000 sec  
Pulse 6.0 usec  
Acq. time 1.300 sec  
Width 32000.0 Hz  
272 repetitions  
OBSERVE C13, 125.6055332 MHz  
DECOUPLE H1, 499.5269647 MHz  
Power 32 dB  
continuously on  
WALTZ-16 modulated  
DATA PROCESSING  
line broadening 1.0 Hz  
FT size 131072  
Total time 19 minutes

| INDEX | FREQUENCY | PPM     | HEIGHT |
|-------|-----------|---------|--------|
| 1     | 18020.027 | 143.454 | 35.5   |
| 2     | 17863.288 | 142.206 | 25.8   |
| 3     | 17649.422 | 140.504 | 26.9   |
| 4     | 17088.617 | 136.177 | 38.9   |
| 5     | 16760.750 | 133.429 | 78.3   |
| 6     | 16731.453 | 133.196 | 37.3   |
| 7     | 16672.371 | 132.726 | 29.7   |
| 8     | 16612.312 | 132.248 | 81.8   |
| 9     | 16062.019 | 127.867 | 80.5   |
| 10    | 15843.758 | 126.129 | 15.4   |
| 11    | 15264.656 | 121.519 | 85.7   |
| 12    | 14981.218 | 119.342 | 89.0   |
| 13    | 9704.109  | 77.253  | 104.8  |
| 14    | 9672.371  | 77.000  | 109.1  |
| 15    | 9640.144  | 76.743  | 105.2  |
| 16    | 8119.636  | 64.639  | 81.5   |
| 17    | 8013.191  | 63.792  | 82.8   |
| 18    | 6731.391  | 53.592  | 58.8   |
| 19    | 6708.504  | 53.405  | 9.6    |
| 20    | 4954.109  | 39.439  | 61.8   |

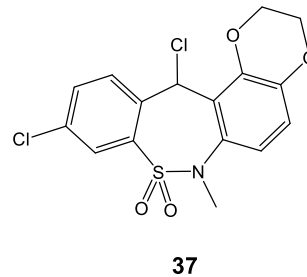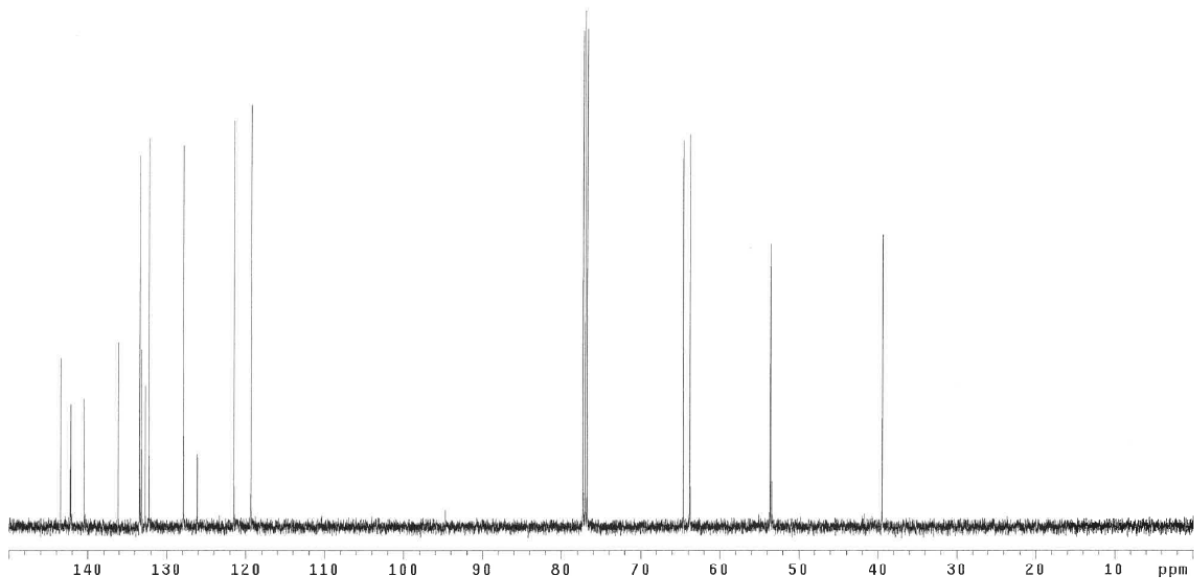

STANDARD 1H  
 52898  
 1952-BGE  
 Berecz Gabor  
 2006.04.06. (BT)  
 Solvent: CDCl3  
 Temp. 25.0 C / 298.1 K  
 INOVA-500 "1500"  
 PULSE SEQUENCE  
 Relax. delay 3.000 sec  
 Pulse 6.4 usec  
 Acq. time 5.000 sec  
 Width 8000.0 Hz  
 16 repetitions  
 OBSERVE H1, 499.5244699 MHz  
 DATA PROCESSING  
 FT size 131072  
 Total time 2 minutes

| INDEX | FREQUENCY | PPM   | HEIGHT | INDEX | FREQUENCY | PPM    | HEIGHT |
|-------|-----------|-------|--------|-------|-----------|--------|--------|
| 1     | 3958.374  | 7.924 | 23.9   | 40    | 1093.994  | 2.190  | 9.3    |
| 2     | 3675.048  | 7.357 | 64.9   | 41    | 841.553   | 1.685  | 16.8   |
| 3     | 3673.950  | 7.355 | 56.9   | 42    | 835.083   | 1.672  | 45.8   |
| 4     | 3627.197  | 7.261 | 8.4    | 43    | 828.857   | 1.659  | 14.1   |
| 5     | 3626.831  | 7.261 | 8.0    | 44    | 801.514   | 1.605  | 5.9    |
| 6     | 3473.999  | 6.955 | 24.4   | 45    | 567.505   | 1.136  | 2.8    |
| 7     | 3465.454  | 6.938 | 32.8   | 46    | 561.401   | 1.124  | 2.8    |
| 8     | 3421.997  | 6.851 | 34.5   | 47    | -0.000    | -0.000 | 8.7    |
| 9     | 3413.330  | 6.833 | 25.0   | 48    | -0.244    | -0.000 | 8.1    |
| 10    | 2434.082  | 4.873 | 38.3   |       |           |        |        |
| 11    | 2133.179  | 4.270 | 7.7    |       |           |        |        |
| 12    | 2130.615  | 4.265 | 15.7   |       |           |        |        |
| 13    | 2126.221  | 4.256 | 42.2   |       |           |        |        |
| 14    | 2124.878  | 4.254 | 40.6   |       |           |        |        |
| 15    | 2119.751  | 4.244 | 2.7    |       |           |        |        |
| 16    | 2115.967  | 4.236 | 20.1   |       |           |        |        |
| 17    | 2113.525  | 4.231 | 10.5   |       |           |        |        |
| 18    | 2112.061  | 4.228 | 7.5    |       |           |        |        |
| 19    | 2108.887  | 4.222 | 8.2    |       |           |        |        |
| 20    | 2104.370  | 4.213 | 8.0    |       |           |        |        |
| 21    | 2102.539  | 4.209 | 11.1   |       |           |        |        |
| 22    | 2098.877  | 4.202 | 6.9    |       |           |        |        |
| 23    | 2097.046  | 4.198 | 6.9    |       |           |        |        |
| 24    | 2094.116  | 4.192 | 4.9    |       |           |        |        |
| 25    | 2089.722  | 4.183 | 2.9    |       |           |        |        |
| 26    | 2087.036  | 4.178 | 3.0    |       |           |        |        |
| 27    | 1740.845  | 3.485 | 163.7  |       |           |        |        |
| 28    | 1730.225  | 3.464 | 3.0    |       |           |        |        |
| 29    | 1143.555  | 2.289 | 9.5    |       |           |        |        |
| 30    | 1141.479  | 2.285 | 9.9    |       |           |        |        |
| 31    | 1139.404  | 2.281 | 9.0    |       |           |        |        |
| 32    | 1136.719  | 2.276 | 11.1   |       |           |        |        |
| 33    | 1134.766  | 2.272 | 14.2   |       |           |        |        |
| 34    | 1130.005  | 2.262 | 6.0    |       |           |        |        |
| 35    | 1107.544  | 2.217 | 6.1    |       |           |        |        |
| 36    | 1102.783  | 2.208 | 14.4   |       |           |        |        |
| 37    | 1100.952  | 2.204 | 11.3   |       |           |        |        |
| 38    | 1098.145  | 2.198 | 9.3    |       |           |        |        |
| 39    | 1096.313  | 2.195 | 10.0   |       |           |        |        |

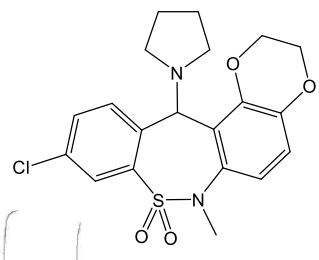

38a

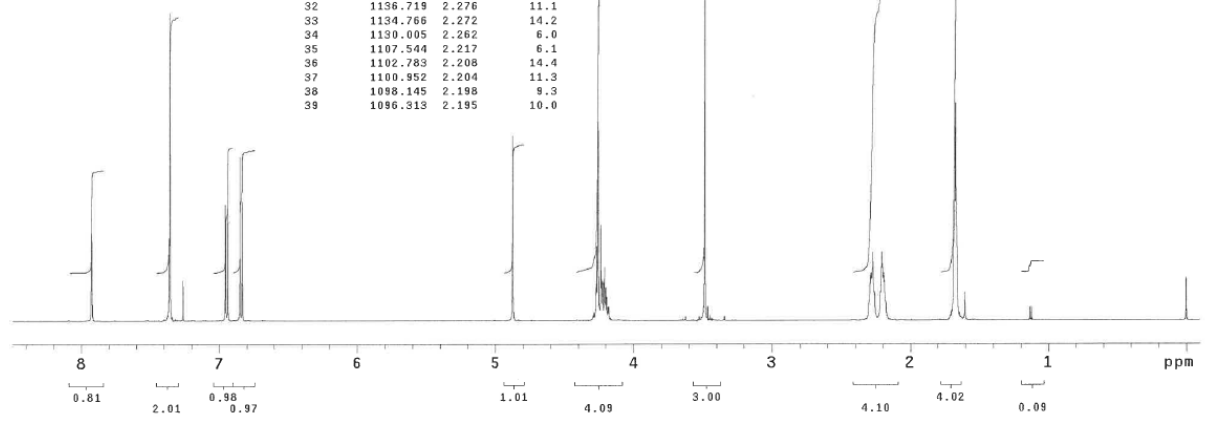

STANDARD 13C  
 52898  
 1952-BGE  
 Berecz Gabor  
 2006.04.06. (BT)  
 Solvent: CDCl3  
 Temp. 25.0 C / 298.1 K  
 User: 1-14-87  
 INOVA-500 "1500"  
 PULSE SEQUENCE  
 Relax. delay 3.000 sec  
 Pulse 6.0 usec  
 Acq. time 1.300 sec  
 Width 32000.0 Hz  
 256 repetitions  
 OBSERVE C13, 125.6055323 MHz  
 DECOUPLE H1, 499.5269647 MHz  
 Power 32 dB  
 continuously on  
 WALTZ-16 modulated  
 DATA PROCESSING  
 Line broadening 1.0 Hz  
 FT size 131072  
 Total time 18 minutes

| INDEX | FREQUENCY | PPM     | HEIGHT |
|-------|-----------|---------|--------|
| 1     | 18063.484 | 143.800 | 21.2   |
| 2     | 18033.211 | 143.559 | 26.7   |
| 3     | 17746.054 | 141.289 | 27.2   |
| 4     | 16979.011 | 135.167 | 32.6   |
| 5     | 16941.114 | 134.066 | 29.4   |
| 6     | 16785.164 | 133.624 | 56.8   |
| 7     | 16506.355 | 131.404 | 22.8   |
| 8     | 16444.832 | 130.914 | 59.0   |
| 9     | 16322.273 | 129.939 | 26.6   |
| 10    | 16094.246 | 128.123 | 59.5   |
| 11    | 15443.367 | 122.942 | 65.6   |
| 12    | 14783.699 | 117.690 | 64.9   |
| 13    | 9704.597  | 77.257  | 96.2   |
| 14    | 9672.371  | 77.000  | 99.2   |
| 15    | 9640.832  | 76.747  | 96.3   |
| 16    | 8132.820  | 64.744  | 57.7   |
| 17    | 8064.461  | 64.200  | 60.6   |
| 18    | 8028.328  | 63.912  | 59.9   |
| 19    | 6687.996  | 53.242  | 116.7  |
| 20    | 5033.211  | 40.068  | 43.6   |
| 21    | 2910.652  | 23.171  | 123.4  |

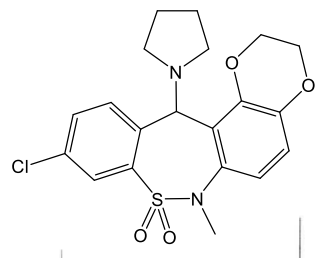

38a

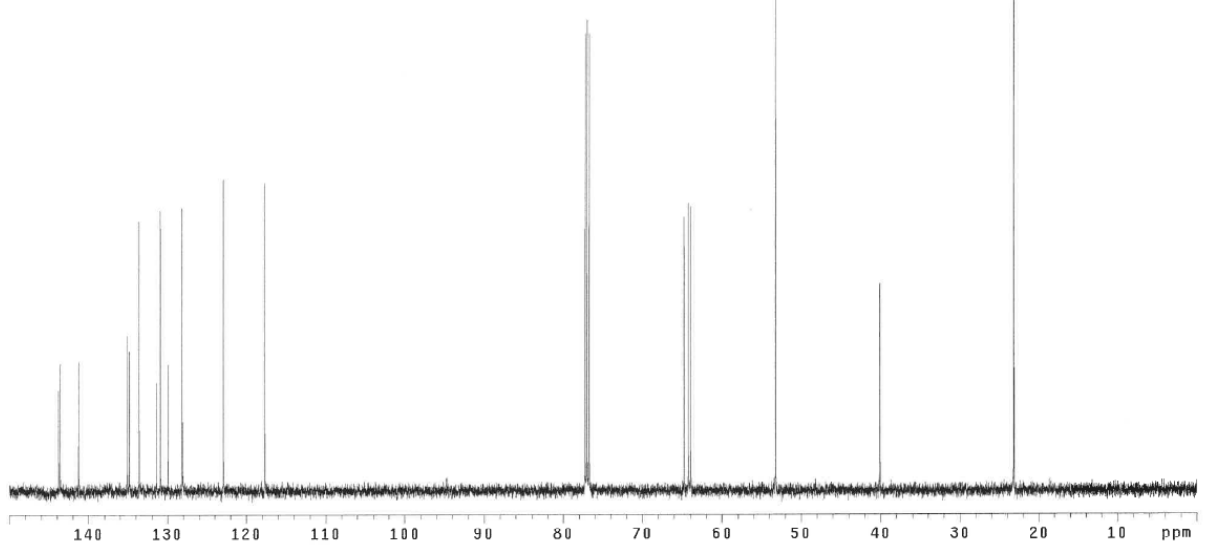







| STANDARD 1H                 | INDEX | FREQUENCY | PPM   | HEIGHT | INDEX | FREQUENCY | PPM   | HEIGHT | INDEX | FREQUENCY | PPM   | HEIGHT |
|-----------------------------|-------|-----------|-------|--------|-------|-----------|-------|--------|-------|-----------|-------|--------|
| 63834                       | 1     | 3966.797  | 7.941 | 21.6   | 40    | 2095.459  | 4.195 | 2.5    | 79    | 645.874   | 1.293 | 2.9    |
| 1954-BGE                    | 2     | 3964.600  | 7.937 | 21.5   | 41    | 2090.454  | 4.185 | 0.6    | 80    | 640.991   | 1.283 | 16.9   |
| Berecz Gabor                | 3     | 3714.478  | 7.436 | 14.1   | 42    | 2074.707  | 4.153 | 0.6    | 81    | 630.672   | 1.279 | 17.5   |
| 2006.04.13. (CzB)           | 4     | 3712.280  | 7.432 | 13.4   | 43    | 2067.627  | 4.138 | 0.6    | 82    | 637.085   | 1.275 | 20.8   |
| Solvent: CDCl3              | 5     | 3706.177  | 7.419 | 22.2   | 44    | 2061.768  | 4.127 | 15.4   | 83    | 633.911   | 1.269 | 35.7   |
| Temp. 25.0 C / 298.1 K      | 6     | 3703.979  | 7.415 | 22.1   | 45    | 2054.565  | 4.113 | 47.6   | 84    | 630.493   | 1.262 | 19.3   |
| INOVA-500 "1500"            | 7     | 3683.960  | 7.375 | 0.8    | 46    | 2047.485  | 4.099 | 48.2   | 85    | 625.854   | 1.253 | 66.6   |
| PULSE SEQUENCE              | 8     | 3678.345  | 7.364 | 15.4   | 47    | 2040.283  | 4.084 | 15.8   | 86    | 618.652   | 1.238 | 114.8  |
| Relax. delay 1.000 sec      | 9     | 3670.044  | 7.347 | 10.0   | 48    | 2034.546  | 4.073 | 0.6    | 87    | 611.572   | 1.224 | 56.4   |
| Pulse 6.4 usec              | 10    | 3631.226  | 7.269 | 11.1   | 49    | 1767.456  | 3.538 | 0.7    | 88    | 608.276   | 1.218 | 1.3    |
| Acq. time 5.000 sec         | 11    | 3467.041  | 6.941 | 21.5   | 50    | 1718.018  | 3.439 | 1.6    | 89    | 605.835   | 1.213 | 1.1    |
| Width 8000.0 Hz             | 12    | 3463.379  | 6.933 | 0.6    | 51    | 1697.876  | 3.399 | 151.7  | 90    | 602.051   | 1.205 | 0.9    |
| 16 repetitions              | 13    | 3458.374  | 6.923 | 34.4   | 52    | 1677.856  | 3.359 | 1.4    | 91    | 598.639   | 1.199 | 1.4    |
| OBSERVE H1, 499.5244656 MHz | 14    | 3451.782  | 6.910 | 0.7    | 53    | 1625.854  | 3.255 | 0.8    | 92    | 591.553   | 1.184 | 0.7    |
| DATA PROCESSING             | 15    | 3431.641  | 6.870 | 44.4   | 54    | 1247.437  | 2.497 | 0.7    | 93    | 554.443   | 1.110 | 0.7    |
| FT size 131072              | 16    | 3428.223  | 6.863 | 0.8    | 55    | 1235.962  | 2.474 | 7.9    | 94    | 0.000     | 9.000 | 11.1   |
| Total time 1 minutes        | 17    | 3426.392  | 6.859 | 0.7    | 56    | 1228.882  | 2.460 | 15.6   |       |           |       |        |
|                             | 18    | 3422.974  | 6.852 | 27.6   | 57    | 1221.680  | 2.446 | 8.9    |       |           |       |        |
|                             | 19    | 2648.804  | 5.303 | 13.3   | 58    | 1209.106  | 2.421 | 0.8    |       |           |       |        |
|                             | 20    | 2645.264  | 5.296 | 4.6    | 59    | 1193.301  | 2.269 | 22.5   |       |           |       |        |
|                             | 21    | 2644.287  | 5.294 | 6.5    | 60    | 1125.977  | 2.254 | 40.1   |       |           |       |        |
|                             | 22    | 2157.949  | 4.319 | 2.9    | 61    | 1118.286  | 2.239 | 25.5   |       |           |       |        |
|                             | 23    | 2154.785  | 4.314 | 0.9    | 62    | 1019.662  | 2.028 | 1.4    |       |           |       |        |
|                             | 24    | 2151.733  | 4.308 | 4.0    | 63    | 803.467   | 1.608 | 2.4    |       |           |       |        |
|                             | 25    | 2148.682  | 4.301 | 6.7    | 64    | 796.021   | 1.594 | 8.6    |       |           |       |        |
|                             | 26    | 2143.311  | 4.291 | 9.9    | 65    | 793.701   | 1.589 | 6.3    |       |           |       |        |
|                             | 27    | 2139.038  | 4.282 | 15.4   | 66    | 788.696   | 1.579 | 12.3   |       |           |       |        |
|                             | 28    | 2134.644  | 4.273 | 24.0   | 67    | 783.691   | 1.569 | 6.9    |       |           |       |        |
|                             | 29    | 2130.737  | 4.266 | 2.1    | 68    | 781.372   | 1.564 | 8.6    |       |           |       |        |
|                             | 30    | 2129.395  | 4.263 | 1.9    | 69    | 773.926   | 1.549 | 2.7    |       |           |       |        |
|                             | 31    | 2125.732  | 4.256 | 27.0   | 70    | 741.699   | 1.485 | 0.8    |       |           |       |        |
|                             | 32    | 2121.094  | 4.246 | 6.1    | 71    | 728.516   | 1.458 | 4.6    |       |           |       |        |
|                             | 33    | 2119.751  | 4.244 | 5.9    | 72    | 721.924   | 1.445 | 7.9    |       |           |       |        |
|                             | 34    | 2115.723  | 4.235 | 6.1    | 73    | 715.942   | 1.433 | 8.0    |       |           |       |        |
|                             | 35    | 2111.084  | 4.226 | 13.7   | 74    | 709.717   | 1.421 | 5.0    |       |           |       |        |
|                             | 36    | 2106.323  | 4.217 | 7.6    | 75    | 703.247   | 1.408 | 2.4    |       |           |       |        |
|                             | 37    | 2105.469  | 4.215 | 7.4    | 76    | 696.289   | 1.394 | 1.1    |       |           |       |        |
|                             | 38    | 2102.295  | 4.209 | 6.3    | 77    | 688.477   | 1.378 | 0.7    |       |           |       |        |
|                             | 39    | 2097.046  | 4.198 | 4.5    | 78    | 681.274   | 1.364 | 0.8    |       |           |       |        |

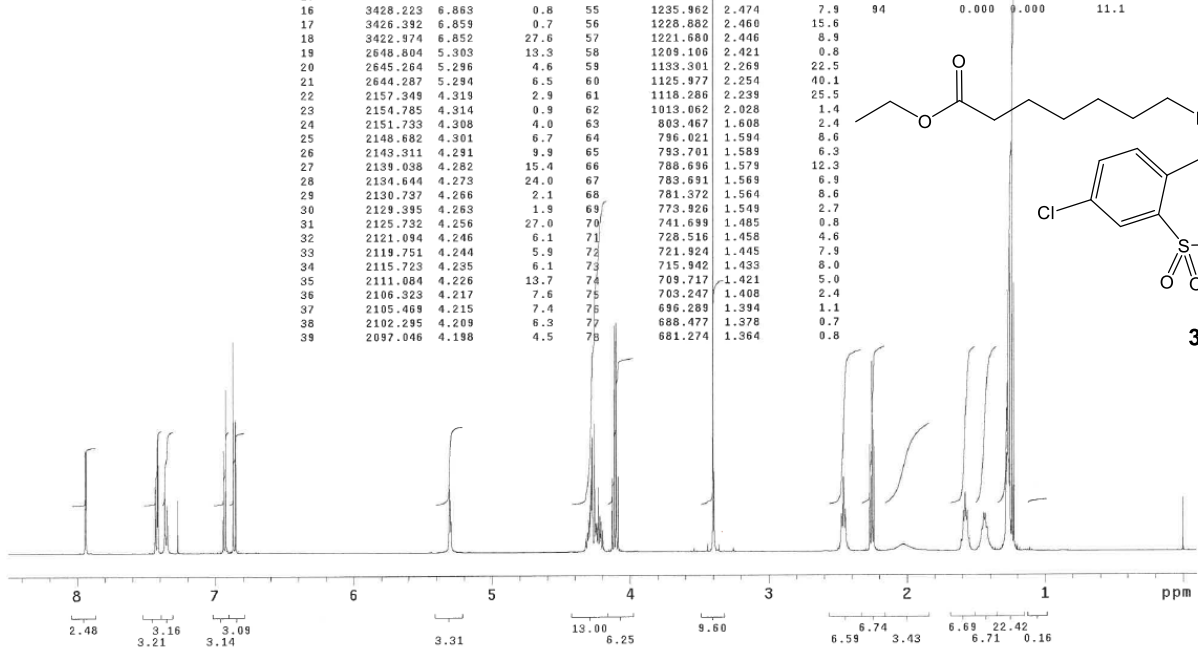

| STANDARD 13C                 | INDEX | FREQUENCY | PPM     | HEIGHT |
|------------------------------|-------|-----------|---------|--------|
| 63834                        | 1     | 21812.508 | 173.645 | 40.0   |
| 1954-BGE                     | 2     | 17985.847 | 143.182 | 43.7   |
| Berecz Gabor                 | 3     | 17825.691 | 141.907 | 7.2    |
| 2006.04.13. (CzB)            | 4     | 17741.219 | 141.235 | 44.2   |
| Solvent: CDCl3               | 5     | 17100.105 | 136.131 | 4.9    |
| Temp. 25.0 C / 298.1 K       | 6     | 16883.308 | 134.405 | 24.6   |
| User: 1-14-87                | 7     | 16728.035 | 133.169 | 4.6    |
| INOVA-500 "1500"             | 8     | 16559.719 | 131.781 | 9.1    |
| PULSE SEQUENCE               | 9     | 16539.558 | 131.668 | 82.6   |
| Relax. delay 3.000 sec       | 10    | 16094.734 | 128.127 | 77.8   |
| Pulse 6.0 usec               | 11    | 15128.426 | 120.435 | 73.5   |
| Acq. time 1.300 sec          | 12    | 14781.258 | 117.671 | 70.0   |
| Width 32000.0 Hz             | 13    | 9704.597  | 77.257  | 125.9  |
| 388 repetitions              | 14    | 9672.371  | 77.000  | 131.3  |
| OBSERVE C13, 125.6055337 MHz | 15    | 9640.633  | 76.747  | 130.0  |
| DECOUPLE H1, 499.5269647 MHz | 16    | 8080.086  | 64.324  | 73.9   |
| Power 32 dB                  | 17    | 8018.074  | 63.830  | 70.1   |
| continuously on              | 18    | 7550.769  | 60.110  | 73.2   |
| WALTZ-16 modulated           | 19    | 7312.508  | 58.214  | 56.8   |
| DATA PROCESSING              | 20    | 6002.937  | 47.788  | 43.8   |
| Line broadening 0.5 Hz       | 21    | 4863.289  | 38.716  | 10.7   |
| Sq. sine bell 1.092 sec      | 22    | 4292.000  | 34.168  | 102.8  |
| Shifted by -0.084 sec        | 23    | 3737.312  | 29.752  | 77.6   |
| FT size 131072               | 24    | 3628.914  | 28.889  | 98.3   |
| Total time 26 minutes        | 25    | 3375.984  | 26.876  | 92.1   |
|                              | 26    | 3110.847  | 24.765  | 113.4  |
|                              | 27    | 1782.722  | 14.192  | 93.2   |

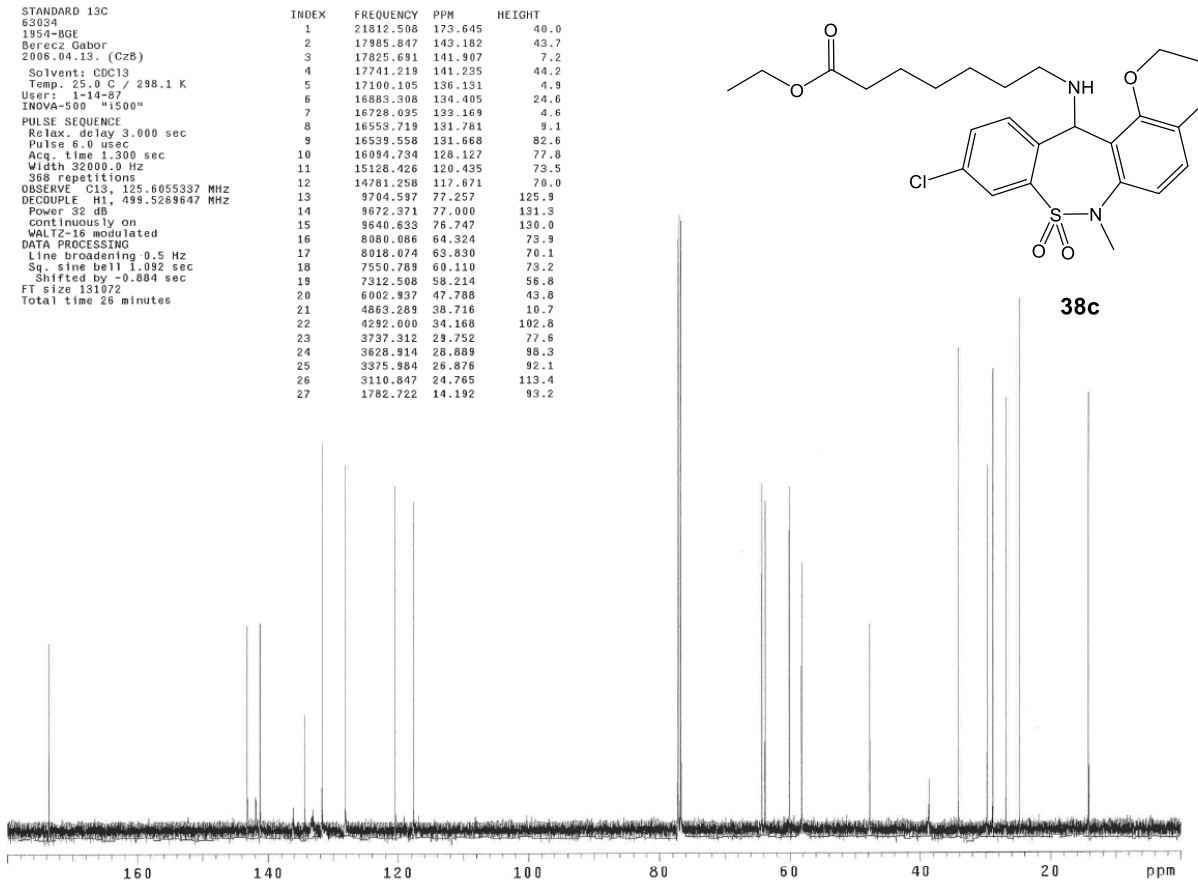

STANDARD 1H  
 63158  
 1956-BCE  
 Berecz Gabor  
 2006/04/25 (SZA)  
 Solvent: CDCl3  
 Temp.: 25.0 C / 298.1 K  
 INOVA-500 "1500"  
 PULSE SEQUENCE  
 Relax. delay 3.000 sec  
 Pulse 6.4 usec  
 Acq. time 5.000 sec  
 Width 8000.0 Hz  
 16 repetitions  
 OBSERVE H1, 499.5244671 MHz  
 DATA PROCESSING  
 FT size 131072  
 Total time 2 minutes

| INDEX | FREQUENCY PPM | HEIGHT |
|-------|---------------|--------|
| 1     | 3964.111      | 7.936  |
| 2     | 3962.646      | 7.933  |
| 3     | 3711.548      | 7.430  |
| 4     | 3709.717      | 7.426  |
| 5     | 3706.605      | 7.420  |
| 6     | 3467.651      | 6.942  |
| 7     | 3458.892      | 6.924  |
| 8     | 3442.383      | 6.891  |
| 9     | 3433.716      | 6.874  |
| 10    | 3376.587      | 6.760  |
| 11    | 2712.036      | 5.429  |
| 12    | 2145.630      | 4.295  |
| 13    | 2141.235      | 4.267  |
| 14    | 2138.184      | 4.280  |
| 15    | 2135.911      | 4.272  |
| 16    | 2129.761      | 4.264  |
| 17    | 2125.244      | 4.255  |
| 18    | 2121.216      | 4.246  |
| 19    | 2119.019      | 4.242  |
| 20    | 2117.065      | 4.238  |
| 21    | 2114.136      | 4.232  |
| 22    | 2111.328      | 4.227  |
| 23    | 2107.178      | 4.218  |
| 24    | 2103.638      | 4.211  |
| 25    | 1609.209      | 3.382  |
| 26    | 1251.953      | 2.506  |
| 27    | 1244.141      | 2.491  |
| 28    | 1094.971      | 2.192  |
| 29    | 1087.646      | 2.177  |
| 30    | 1080.322      | 2.163  |
| 31    | 785.503       | 1.532  |
| 32    | 758.789       | 1.519  |
| 33    | 751.953       | 1.505  |
| 34    | 726.186       | 1.454  |
| 35    | 619.751       | 1.241  |

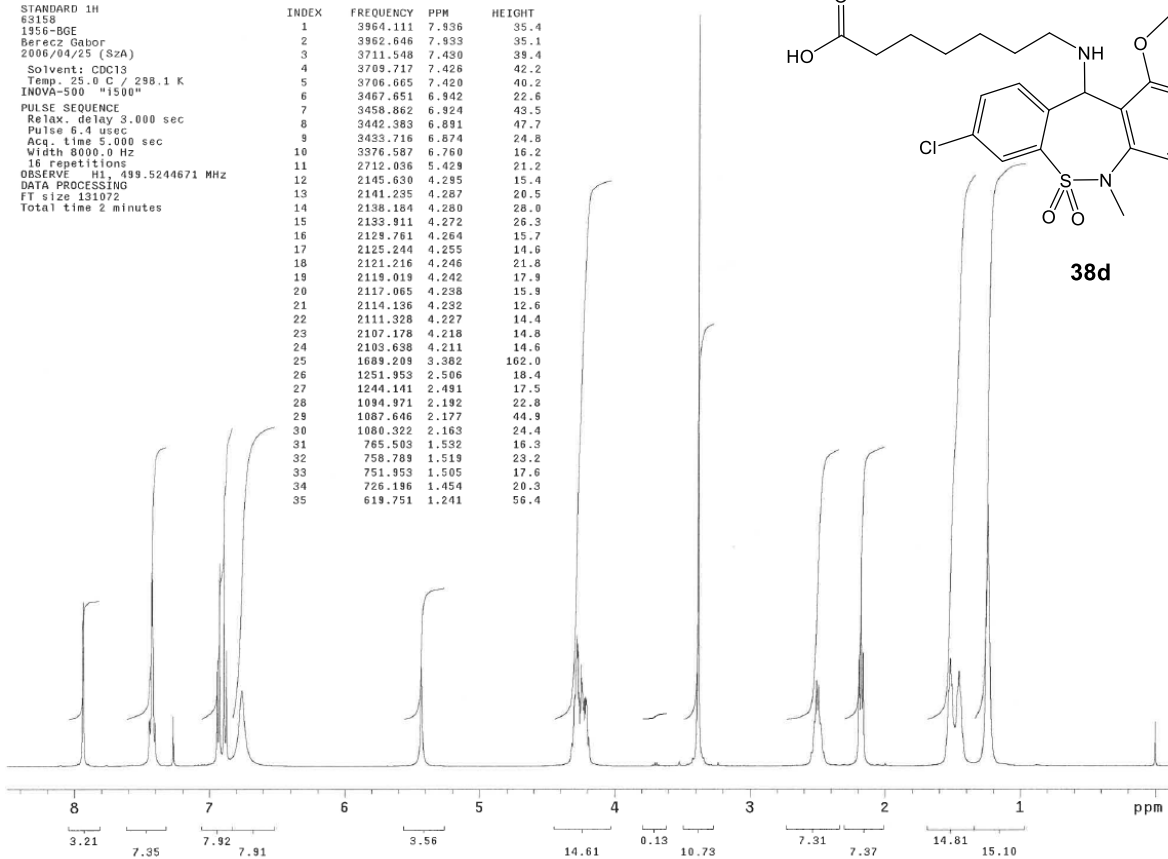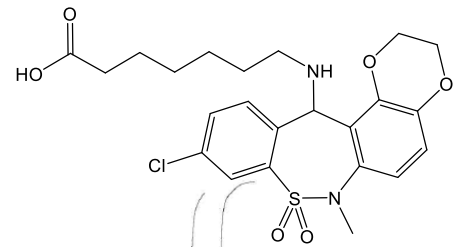

38d

STANDARD 13C  
 63158  
 1956-BCE  
 Berecz Gabor  
 2006/04/25 (SZA)  
 Solvent: CDCl3  
 Temp.: 25.0 C / 298.1 K  
 User: 1-14-07  
 INOVA-500 "1500"  
 PULSE SEQUENCE  
 Relax. delay 3.000 sec  
 Pulse 6.0 usec  
 Acq. time 1.300 sec  
 Width 32000.0 Hz  
 800 repetitions  
 OBSERVE C13, 125.6055337 MHz  
 DECOUPLE H1, 499.5269647 MHz  
 Power 32 dB  
 continuously on  
 WALTZ-16 modulated  
 DATA PROCESSING  
 Line broadening 2.0 Hz  
 FT size 131072  
 Total time 57 minutes

| INDEX | FREQUENCY PPM | HEIGHT  |
|-------|---------------|---------|
| 1     | 22338.875     | 177.836 |
| 2     | 17980.955     | 143.143 |
| 3     | 17809.090     | 141.725 |
| 4     | 17750.496     | 141.308 |
| 5     | 16949.715     | 134.334 |
| 6     | 16910.164     | 134.619 |
| 7     | 16793.465     | 133.690 |
| 8     | 16567.879     | 131.894 |
| 9     | 16091.316     | 128.100 |
| 10    | 15845.222     | 126.141 |
| 11    | 15035.164     | 119.692 |
| 12    | 14033.015     | 118.083 |
| 13    | 9704.109      | 77.253  |
| 14    | 8672.371      | 77.000  |
| 15    | 8640.144      | 76.743  |
| 16    | 8088.875      | 64.394  |
| 17    | 8020.027      | 63.846  |
| 18    | 7201.179      | 57.327  |
| 19    | 5921.883      | 47.143  |
| 20    | 4783.211      | 38.078  |
| 21    | 4326.668      | 34.444  |
| 22    | 3634.285      | 28.932  |
| 23    | 3622.566      | 28.839  |
| 24    | 3369.636      | 26.825  |
| 25    | 3119.148      | 24.831  |

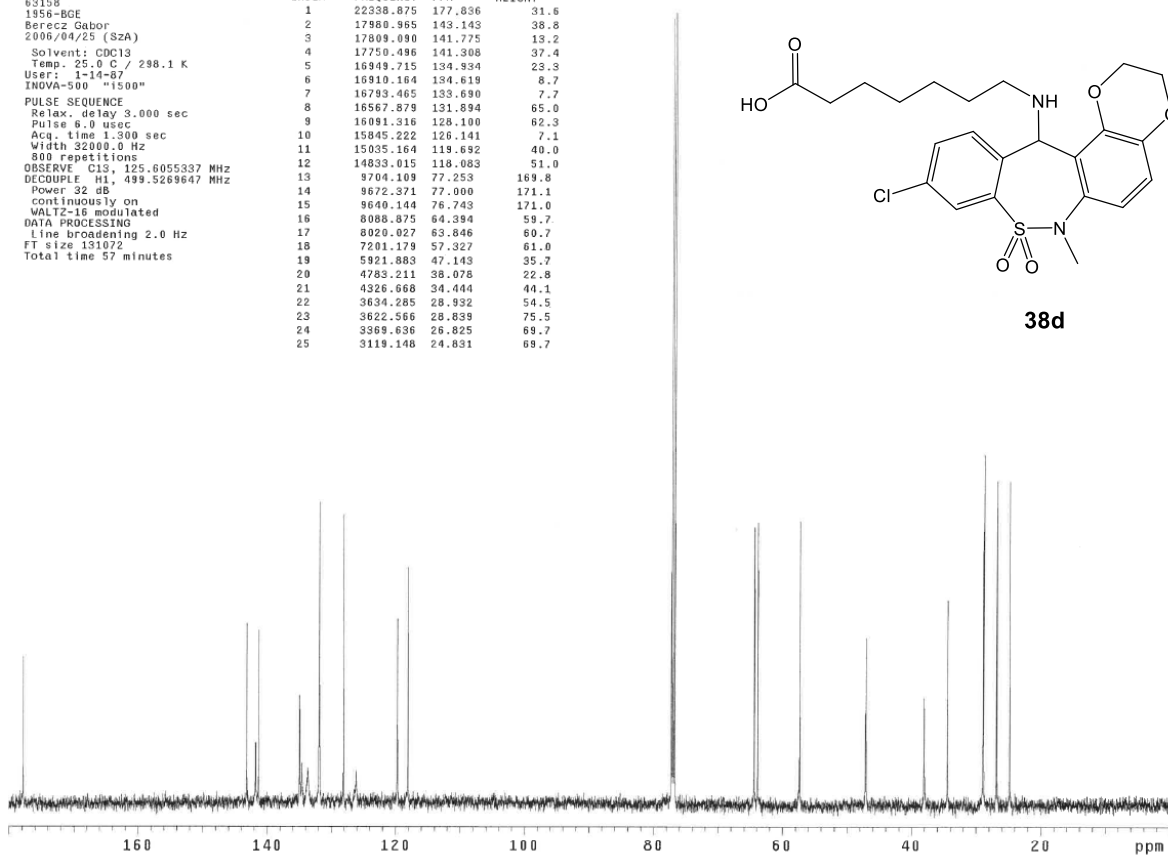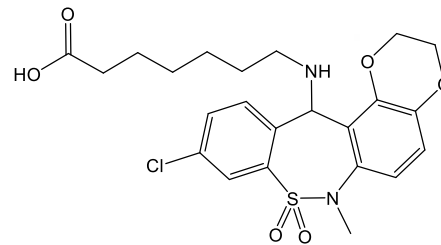

38d

| STANDARD 1H                 | INDEX | FREQUENCY | PPM   | HEIGHT |
|-----------------------------|-------|-----------|-------|--------|
| 63932                       | 1     | 4145.752  | 8.239 | 12.5   |
| 1975-BGE                    | 2     | 3954.224  | 7.918 | 22.4   |
| Berecz Gabor                | 3     | 3952.026  | 7.912 | 22.3   |
| 2006-06-20 (CzB)            | 4     | 3907.715  | 7.823 | 24.1   |
| Solvent: CDCl3              | 5     | 3899.414  | 7.806 | 27.4   |
| Temp. 25.0 C / 298.1 K      | 6     | 3773.315  | 7.554 | 15.9   |
| INDVA-500 "1500"            | 7     | 3771.118  | 7.549 | 15.4   |
| PULSE SEQUENCE              | 8     | 3765.015  | 7.537 | 14.3   |
| Relax. delay 1.000 sec      | 9     | 3762.939  | 7.533 | 13.5   |
| Pulse 6.4 usec              | 10    | 3628.764  | 7.264 | 4.2    |
| Acq. time 5.000 sec         | 11    | 3574.097  | 7.155 | 13.9   |
| Width 8000.0 Hz             | 12    | 3572.632  | 7.152 | 13.3   |
| 16 repetitions              | 13    | 3565.918  | 7.139 | 15.6   |
| OBSERVE H1, 499.5244685 MHz | 14    | 3564.453  | 7.136 | 14.2   |
| DATA PROCESSING             | 15    | 3400.146  | 6.807 | 13.4   |
| FT size 131072              | 16    | 3391.846  | 6.790 | 27.4   |
| Total time 1 minutes        | 17    | 3383.667  | 6.774 | 15.5   |
|                             | 18    | 3328.491  | 6.663 | 16.7   |
|                             | 19    | 3327.026  | 6.660 | 15.9   |
|                             | 20    | 3320.190  | 6.647 | 13.5   |
|                             | 21    | 3318.726  | 6.644 | 12.0   |
|                             | 22    | 2053.955  | 4.112 | 18.2   |
|                             | 23    | 2051.392  | 4.107 | 16.6   |
|                             | 24    | 2049.927  | 4.104 | 21.0   |
|                             | 25    | 2047.852  | 4.100 | 16.7   |
|                             | 26    | 2045.854  | 4.095 | 25.0   |
|                             | 27    | 2025.635  | 4.055 | 1.7    |
|                             | 28    | 2025.146  | 4.054 | 1.6    |
|                             | 29    | 2005.127  | 4.014 | 159.1  |
|                             | 30    | 2000.000  | 4.004 | 25.9   |
|                             | 31    | 1997.803  | 3.999 | 16.9   |
|                             | 32    | 1995.850  | 3.995 | 21.8   |
|                             | 33    | 1994.263  | 3.992 | 15.4   |
|                             | 34    | 1991.821  | 3.987 | 18.0   |
|                             | 35    | 1985.107  | 3.974 | 1.4    |
|                             | 36    | 827.837   | 1.857 | 1.5    |
|                             | 37    | 0.000     | 0.000 | 5.1    |

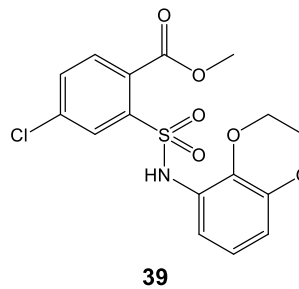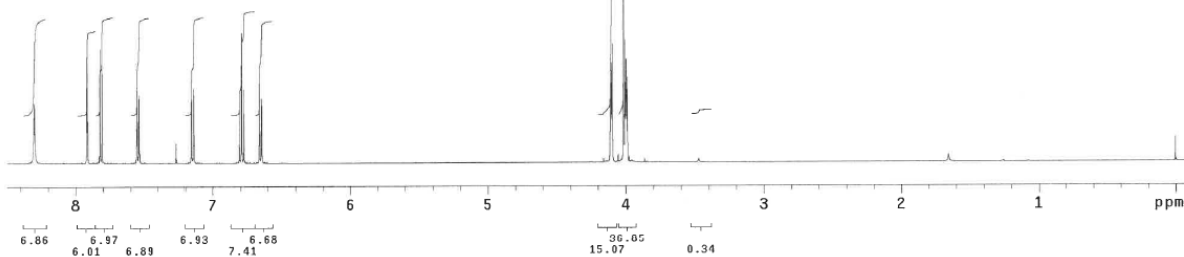

| STANDARD 13C                 | INDEX | FREQUENCY | PPM     | HEIGHT |
|------------------------------|-------|-----------|---------|--------|
| 63932                        | 1     | 20898.445 | 166.369 | 25.7   |
| 1975-BGE                     | 2     | 18025.398 | 143.497 | 23.3   |
| Berecz Gabor                 | 3     | 17708.016 | 140.970 | 19.8   |
| 2006-06-20 (CzB)             | 4     | 17319.344 | 137.876 | 27.7   |
| Solvent: CDCl3               | 5     | 17022.957 | 135.517 | 21.4   |
| Temp. 25.0 C / 298.1 K       | 6     | 16615.730 | 132.275 | 58.8   |
| user: 1-14-87                | 7     | 16593.758 | 132.100 | 55.5   |
| INDVA-500 "1500"             | 8     | 16315.926 | 129.888 | 60.8   |
| PULSE SEQUENCE               | 9     | 16145.516 | 128.532 | 19.4   |
| Relax. delay 3.000 sec       | 10    | 15794.383 | 125.259 | 28.6   |
| Pulse 6.0 usec               | 11    | 15176.766 | 120.819 | 64.8   |
| Acq. time 1.300 sec          | 12    | 14521.492 | 115.603 | 82.1   |
| Width 32000.0 Hz             | 13    | 14357.318 | 114.301 | 60.0   |
| 183 repetitions              | 14    | 9704.109  | 77.253  | 48.0   |
| OBSERVE C13, 125.6055357 MHz | 15    | 9672.371  | 77.000  | 50.1   |
| DECOUPLE H1, 499.5263647 MHz | 16    | 9640.144  | 76.743  | 47.9   |
| Power 32 dB                  | 17    | 8074.226  | 64.277  | 50.4   |
| continuously on              | 18    | 8026.375  | 63.897  | 54.8   |
| WALTZ-16 modulated           | 19    | 6767.039  | 53.394  | 41.3   |
| DATA PROCESSING              |       |           |         |        |
| Line broadening 0.5 Hz       |       |           |         |        |
| FT size 131072               |       |           |         |        |
| Total time 13 minutes        |       |           |         |        |

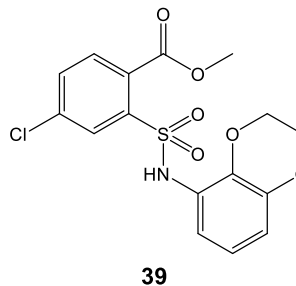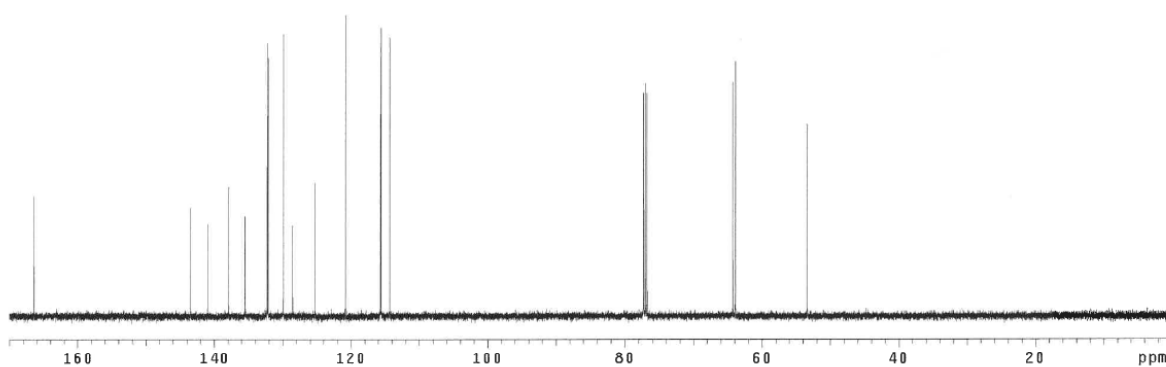



STANDARD 1H  
 64032  
 1976-BGE  
 Berecz Gabor  
 2006.06.22. (CzB)  
 Solvent: CDC13  
 Temp. 25.0 C / 298.1 K  
 INOVA-500 "1500"  
 PULSE SEQUENCE  
 Relax. delay 1.000 sec  
 Pulse 6.4 usec  
 Acq. time 5.000 sec  
 Width 8000.0 Hz  
 16 repetitions  
 OBSERVE H1, 499.5244646 MHz  
 DATA PROCESSING  
 FT size 131072  
 Total time 1 minutes

| INDEX | FREQUENCY | PPM   | HEIGHT |
|-------|-----------|-------|--------|
| 1     | 3862.061  | 7.731 | 17.7   |
| 2     | 3860.107  | 7.728 | 18.1   |
| 3     | 3768.921  | 7.545 | 10.5   |
| 4     | 3766.846  | 7.541 | 9.9    |
| 5     | 3760.742  | 7.529 | 13.2   |
| 6     | 3758.667  | 7.524 | 12.9   |
| 7     | 3705.933  | 7.419 | 22.5   |
| 8     | 3697.754  | 7.403 | 17.5   |
| 9     | 3632.935  | 7.273 | 2.8    |
| 10    | 3453.613  | 6.914 | 8.8    |
| 11    | 3451.904  | 6.910 | 10.1   |
| 12    | 3445.923  | 6.898 | 11.5   |
| 13    | 3444.214  | 6.895 | 15.0   |
| 14    | 3441.650  | 6.890 | 8.7    |
| 15    | 3439.541  | 6.886 | 8.6    |
| 16    | 3439.472  | 6.873 | 17.3   |
| 17    | 3431.763  | 6.870 | 11.2   |
| 18    | 3411.743  | 6.830 | 16.9   |
| 19    | 3403.809  | 6.814 | 17.2   |
| 20    | 3395.752  | 6.798 | 7.7    |
| 21    | 2070.313  | 4.145 | 15.6   |
| 22    | 2066.650  | 4.137 | 15.9   |
| 23    | 2062.134  | 4.128 | 17.9   |
| 24    | 1962.036  | 3.928 | 11.5   |
| 25    | 1959.473  | 3.923 | 10.5   |
| 26    | 1957.886  | 3.919 | 12.4   |
| 27    | 1953.979  | 3.912 | 9.6    |
| 28    | 1883.911  | 3.771 | 123.3  |
| 29    | 1645.020  | 3.293 | 124.3  |
| 30    | 845.337   | 1.692 | 3.6    |
| 31    | 0.000     | 0.000 | 3.3    |

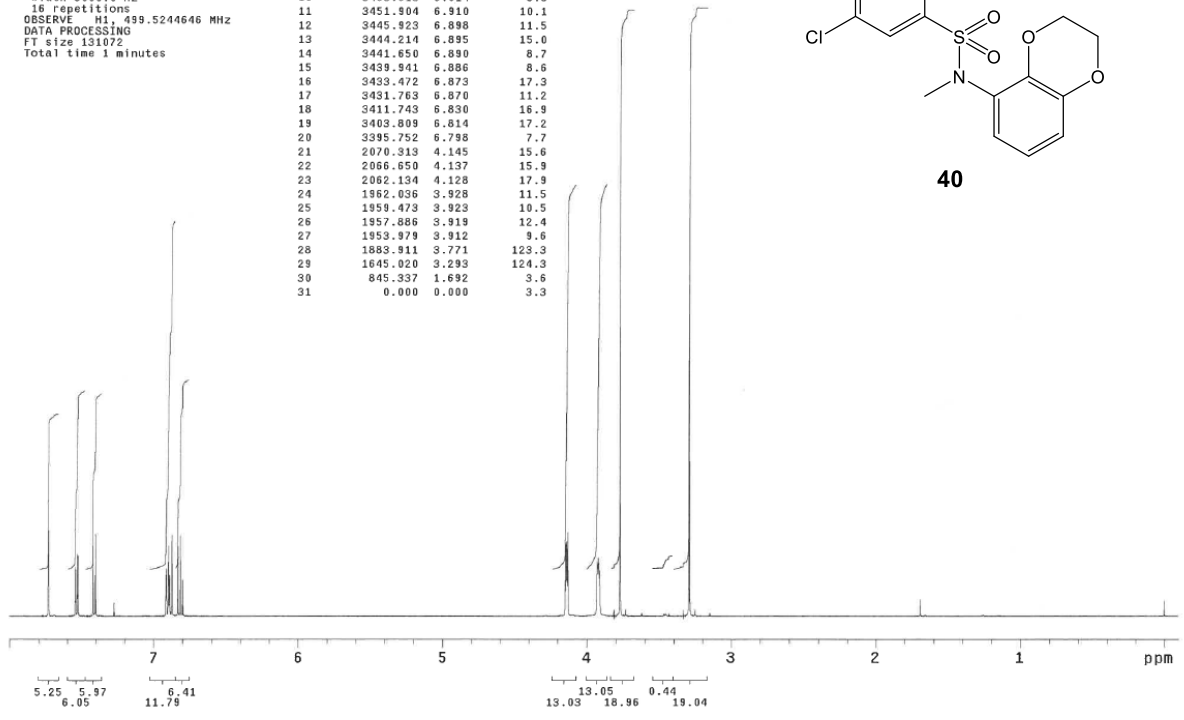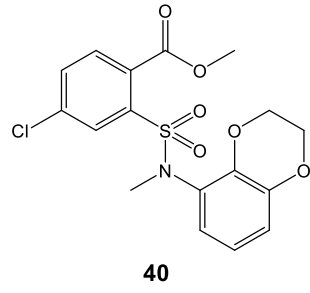

STANDARD 13C  
 64032  
 1976-BGE  
 Berecz Gabor  
 2006.06.22. (CzB)  
 Solvent: CDC13  
 Temp. 25.0 C / 298.1 K  
 User: 1-14-87  
 INOVA-500 "1500"  
 PULSE SEQUENCE  
 Relax. delay 3.000 sec  
 Pulse 6.0 usec  
 Acq. time 1.300 sec  
 Width 92000.0 Hz  
 400 repetitions  
 OBSERVE C13, 125.6055371 MHz  
 DECOUPLE H1, 499.5269647 MHz  
 Power 32 dB  
 continuously on  
 WALTZ-16 modulated  
 DATA PROCESSING  
 Line broadening 0.5 Hz  
 FT size 131072  
 Total time 28 minutes

| INDEX | FREQUENCY | PPM     | HEIGHT |
|-------|-----------|---------|--------|
| 1     | 21038.094 | 167.480 | 33.9   |
| 2     | 18134.773 | 144.368 | 35.3   |
| 3     | 17721.199 | 141.075 | 30.0   |
| 4     | 17474.617 | 139.112 | 24.2   |
| 5     | 17037.117 | 135.629 | 44.0   |
| 6     | 16556.160 | 131.801 | 89.8   |
| 7     | 16519.051 | 131.505 | 34.0   |
| 8     | 16246.590 | 129.336 | 85.8   |
| 9     | 16223.641 | 129.153 | 91.4   |
| 10    | 16118.660 | 128.318 | 28.8   |
| 11    | 15940.047 | 123.712 | 63.5   |
| 12    | 15128.914 | 120.439 | 98.5   |
| 13    | 14778.816 | 117.651 | 100.0  |
| 14    | 9704.108  | 77.253  | 52.1   |
| 15    | 9672.371  | 77.000  | 54.7   |
| 16    | 9640.145  | 76.743  | 52.4   |
| 17    | 8045.418  | 64.048  | 74.7   |
| 18    | 8015.633  | 63.811  | 83.6   |
| 19    | 6865.047  | 53.059  | 52.1   |
| 20    | 4799.324  | 38.207  | 75.9   |

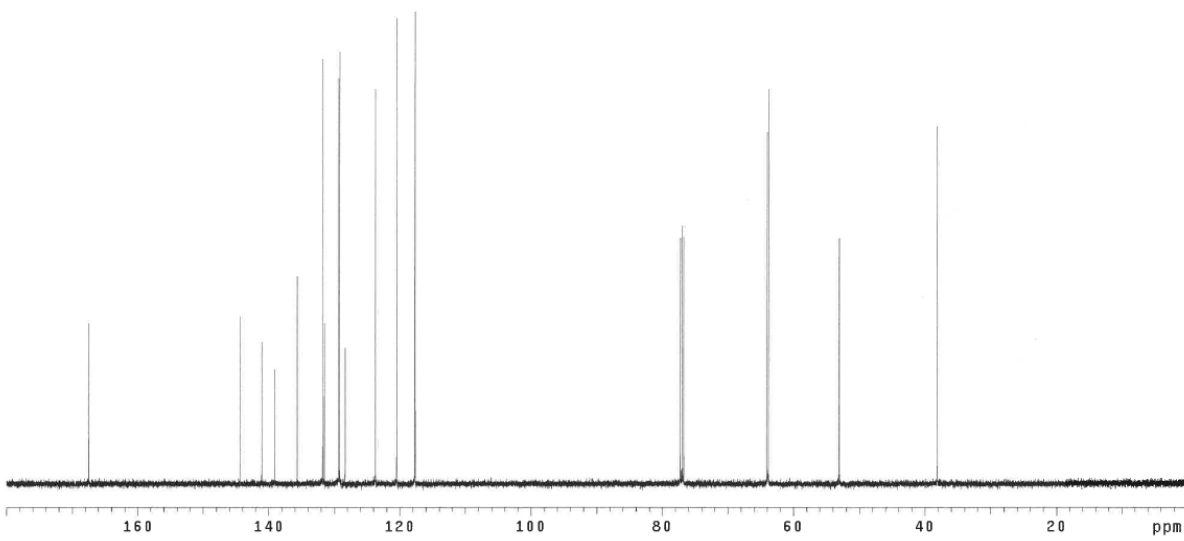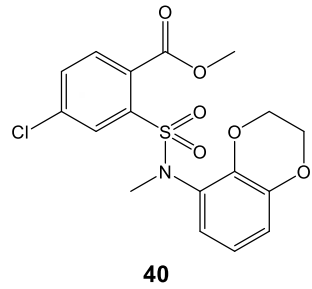

STANDARD 1H  
64048  
1377-BGE  
Berecz Gabor  
2006.06.23. (CzB)  
Solvent: DMSO  
Temp. 25.0 C / 298.1 K  
INOVA-500 "1500"  
PULSE SEQUENCE  
Relax. delay 1.000 sec  
Pulse 6.4 usec  
Acq. time 5.900 sec  
Width 11999.4 Hz  
16 repetitions  
OBSERVE H1, 499.5268312 MHz  
DATA PROCESSING  
FT size 131072  
Total time 1 minutes

| INDEX | FREQUENCY | PPM    | HEIGHT | INDEX | FREQUENCY | PPM    | HEIGHT |
|-------|-----------|--------|--------|-------|-----------|--------|--------|
| 1     | 6779.690  | 13.572 | 0.9    | 40    | 1254.027  | 2.510  | 6.5    |
| 2     | 3900.318  | 7.808  | 16.8   | 41    | 1252.379  | 2.507  | 8.5    |
| 3     | 3898.121  | 7.804  | 17.0   | 42    | 1250.548  | 2.503  | 6.0    |
| 4     | 3892.078  | 7.792  | 20.2   | 43    | 552.402   | 1.106  | 1.7    |
| 5     | 3889.881  | 7.787  | 20.8   | 44    | 545.261   | 1.092  | 3.5    |
| 6     | 3818.840  | 7.645  | 35.8   | 45    | 538.303   | 1.078  | 1.7    |
| 7     | 3810.600  | 7.628  | 29.8   | 46    | -0.000    | -0.000 | 11.3   |
| 8     | 3754.938  | 7.517  | 31.8   |       |           |        |        |
| 9     | 3752.925  | 7.513  | 30.1   |       |           |        |        |
| 10    | 3452.647  | 6.912  | 13.6   |       |           |        |        |
| 11    | 3450.816  | 6.908  | 14.2   |       |           |        |        |
| 12    | 3444.591  | 6.896  | 21.5   |       |           |        |        |
| 13    | 3442.760  | 6.892  | 20.9   |       |           |        |        |
| 14    | 3423.352  | 6.853  | 0.8    |       |           |        |        |
| 15    | 3418.957  | 6.844  | 14.0   |       |           |        |        |
| 16    | 3410.901  | 6.828  | 32.1   |       |           |        |        |
| 17    | 3403.028  | 6.813  | 21.5   |       |           |        |        |
| 18    | 3396.986  | 6.800  | 24.8   |       |           |        |        |
| 19    | 3394.972  | 6.796  | 24.5   |       |           |        |        |
| 20    | 3388.930  | 6.784  | 11.9   |       |           |        |        |
| 21    | 3387.089  | 6.781  | 9.3    |       |           |        |        |
| 22    | 2076.312  | 4.157  | 19.5   |       |           |        |        |
| 23    | 2072.467  | 4.149  | 26.9   |       |           |        |        |
| 24    | 2068.256  | 4.140  | 21.8   |       |           |        |        |
| 25    | 2056.721  | 4.117  | 0.5    |       |           |        |        |
| 26    | 1982.609  | 3.929  | 19.3   |       |           |        |        |
| 27    | 1700.232  | 3.404  | 1.2    |       |           |        |        |
| 28    | 1693.275  | 3.390  | 2.3    |       |           |        |        |
| 29    | 1686.317  | 3.376  | 2.4    |       |           |        |        |
| 30    | 1679.359  | 3.362  | 1.5    |       |           |        |        |
| 31    | 1658.740  | 3.341  | 1.6    |       |           |        |        |
| 32    | 1626.628  | 3.256  | 0.6    |       |           |        |        |
| 33    | 1619.304  | 3.242  | 1.8    |       |           |        |        |
| 34    | 1611.797  | 3.227  | 0.8    |       |           |        |        |
| 35    | 1598.980  | 3.201  | 164.1  |       |           |        |        |
| 36    | 1588.727  | 3.180  | 1.0    |       |           |        |        |
| 37    | 1585.065  | 3.173  | 0.7    |       |           |        |        |
| 38    | 1579.206  | 3.161  | 1.7    |       |           |        |        |
| 39    | 1527.023  | 3.057  | 0.9    |       |           |        |        |

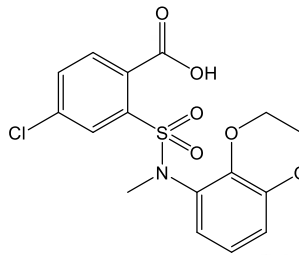

41

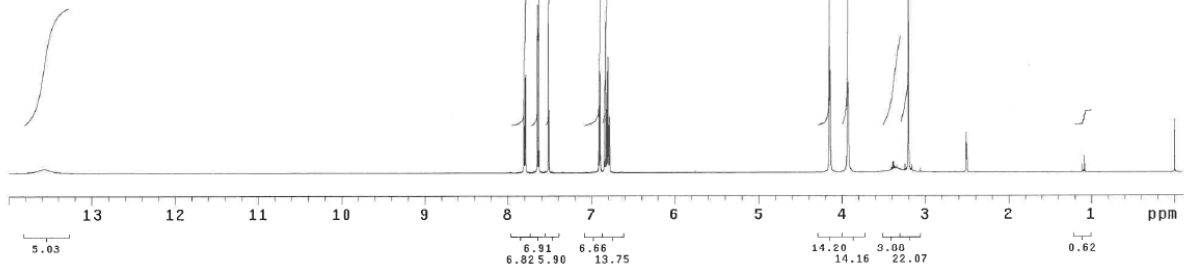

STANDARD 13C  
64048  
1377-BGE  
Berecz Gabor  
2006.06.23. (CzB)  
Solvent: DMSO  
Temp. 25.0 C / 298.1 K  
User: 1-14-87  
INOVA-500 "1500"  
PULSE SEQUENCE  
Relax. delay 3.000 sec  
Pulse 6.0 usec  
Acq. time 1.300 sec  
Width 32000.0 Hz  
631 repetitions  
OBSERVE C13, 125.6061572 MHz  
DECOUPLE H1, 499.5293374 MHz  
Power 32 dB  
continuously on  
WALTZ-16 modulated  
DATA PROCESSING  
Line broadening 0.5 Hz  
FT size 131072  
Total time 45 minutes

| INDEX | FREQUENCY | PPM     | HEIGHT |
|-------|-----------|---------|--------|
| 1     | 21128.364 | 168.205 | 35.2   |
| 2     | 18150.825 | 144.500 | 36.6   |
| 3     | 17737.739 | 141.212 | 36.2   |
| 4     | 17303.169 | 137.752 | 40.1   |
| 5     | 16827.583 | 133.966 | 31.5   |
| 6     | 16761.665 | 133.441 | 17.4   |
| 7     | 16677.680 | 132.772 | 38.4   |
| 8     | 16318.794 | 129.915 | 37.9   |
| 9     | 16140.083 | 128.492 | 37.6   |
| 10    | 16122.505 | 128.353 | 34.9   |
| 11    | 15479.926 | 123.237 | 44.9   |
| 12    | 15122.505 | 120.391 | 42.8   |
| 13    | 14771.919 | 117.600 | 42.1   |
| 14    | 8067.329  | 64.225  | 35.7   |
| 15    | 8017.524  | 63.828  | 37.1   |
| 16    | 5049.751  | 40.201  | 23.7   |
| 17    | 5028.755  | 40.034  | 70.9   |
| 18    | 5018.989  | 39.957  | 7.3    |
| 19    | 5007.759  | 39.867  | 141.0  |
| 20    | 4986.762  | 39.700  | 165.6  |
| 21    | 4965.766  | 39.533  | 139.7  |
| 22    | 4944.770  | 39.366  | 70.9   |
| 23    | 4923.774  | 39.199  | 22.9   |
| 24    | 4793.891  | 38.165  | 60.6   |

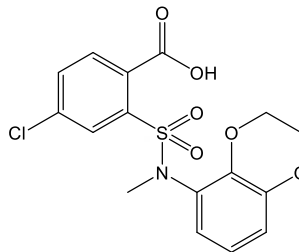

41

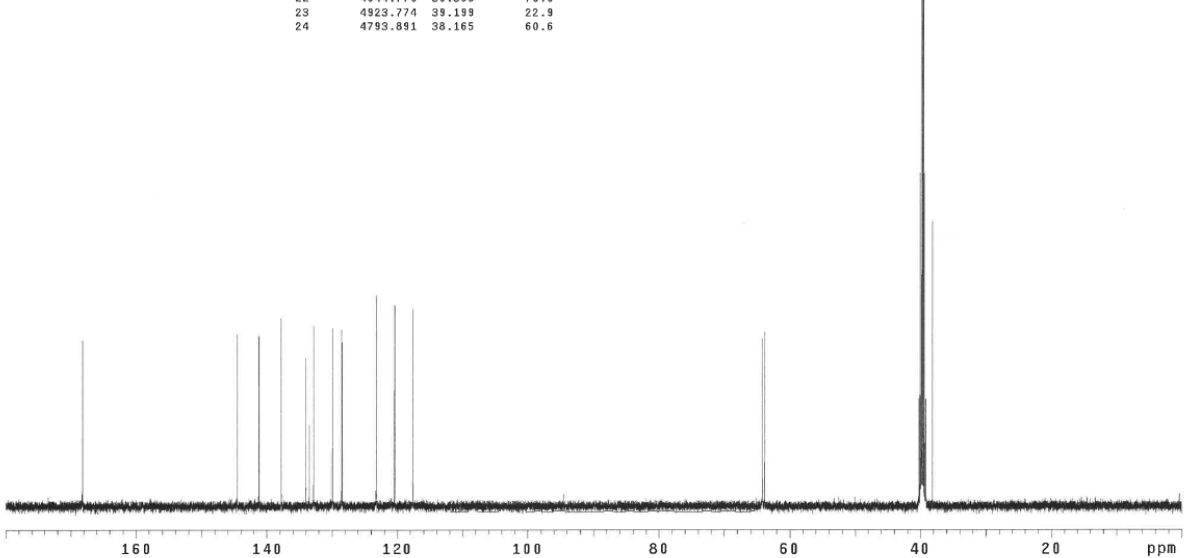

STANDARD 1H  
 64124  
 1978-BGE  
 Berecz Gabor  
 2006.06.29. (BT)  
 Solvent: CDCl3 + CD3OD  
 Temp. 25.0 C / 298.1 K  
 INOVA-500 "1500"  
 PULSE SEQUENCE  
 Relax. delay 3.000 sec  
 Pulse 6.4 usec  
 Acq. time 5.000 sec  
 Width 8000.0 Hz  
 16 repetitions  
 OBSERVE H1, 499.5244200 MHz  
 DATA PROCESSING  
 FT size 131072  
 Total time 2 minutes

| INDEX | FREQUENCY PPM | HEIGHT |
|-------|---------------|--------|
| 1     | 4007.955      | 8.024  |
| 2     | 3999.512      | 8.007  |
| 3     | 3985.352      | 7.978  |
| 4     | 3983.276      | 7.974  |
| 5     | 3946.777      | 7.901  |
| 6     | 3937.744      | 7.883  |
| 7     | 3851.196      | 7.710  |
| 8     | 3849.121      | 7.706  |
| 9     | 3842.896      | 7.693  |
| 10    | 3840.698      | 7.689  |
| 11    | 3677.124      | 7.361  |
| 12    | 3488.770      | 6.984  |
| 13    | 3479.736      | 6.966  |
| 14    | 2206.055      | 4.416  |
| 15    | 2202.026      | 4.408  |
| 16    | 2195.679      | 4.396  |
| 17    | 2191.650      | 4.387  |
| 18    | 1816.040      | 3.636  |
| 19    | 1550.415      | 3.104  |
| 20    | -0.000        | -0.000 |

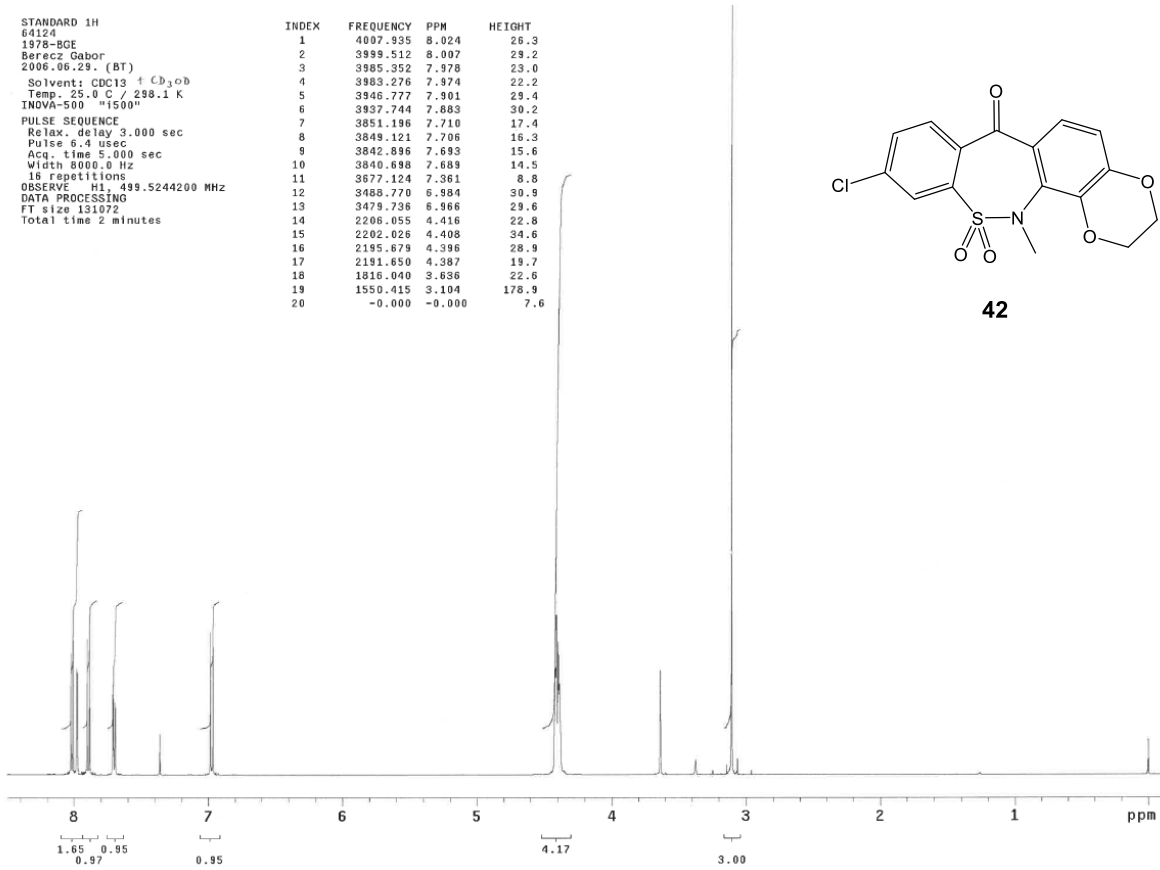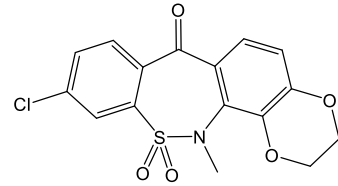

42

STANDARD 13C  
 64124  
 1978-BGE  
 Berecz Gabor  
 2006.06.29. (BT)  
 Solvent: CDCl3 + CD3OD  
 Temp. 25.0 C / 298.1 K  
 User: 1-14-07  
 INOVA-500 "1500"  
 PULSE SEQUENCE  
 Relax. delay 1.200 sec  
 Pulse 6.0 usec  
 Acq. time 1.300 sec  
 Width 32000.0 Hz  
 288 repetitions  
 OBSERVE C13, 125.605381 MHz  
 DECOUPLE H1, 499.5269647 MHz  
 Power 32 dB  
 continuously on  
 WALTZ-16 modulated  
 DATA PROCESSING  
 Line broadening 0.5 Hz  
 FT size 131072  
 Total time 12 minutes

| INDEX | FREQUENCY PPM | HEIGHT  |
|-------|---------------|---------|
| 1     | 23565.926     | 187.604 |
| 2     | 16758.797     | 149.335 |
| 3     | 17411.141     | 138.607 |
| 4     | 17387.469     | 138.498 |
| 5     | 17279.793     | 137.561 |
| 6     | 16842.781     | 134.082 |
| 7     | 16812.996     | 133.845 |
| 8     | 16720.223     | 133.107 |
| 9     | 16393.074     | 130.502 |
| 10    | 15881.844     | 126.432 |
| 11    | 15820.320     | 125.943 |
| 12    | 15622.078     | 124.365 |
| 13    | 14605.477     | 116.272 |
| 14    | 9704.598      | 77.257  |
| 15    | 9672.371      | 77.000  |
| 16    | 8640.145      | 76.743  |
| 17    | 8080.574      | 64.328  |
| 18    | 8051.766      | 64.099  |
| 19    | 6175.301      | 49.160  |
| 20    | 6153.817      | 48.989  |
| 21    | 6132.332      | 48.818  |
| 22    | 6110.848      | 48.647  |
| 23    | 6089.363      | 48.476  |
| 24    | 4740.242      | 37.736  |

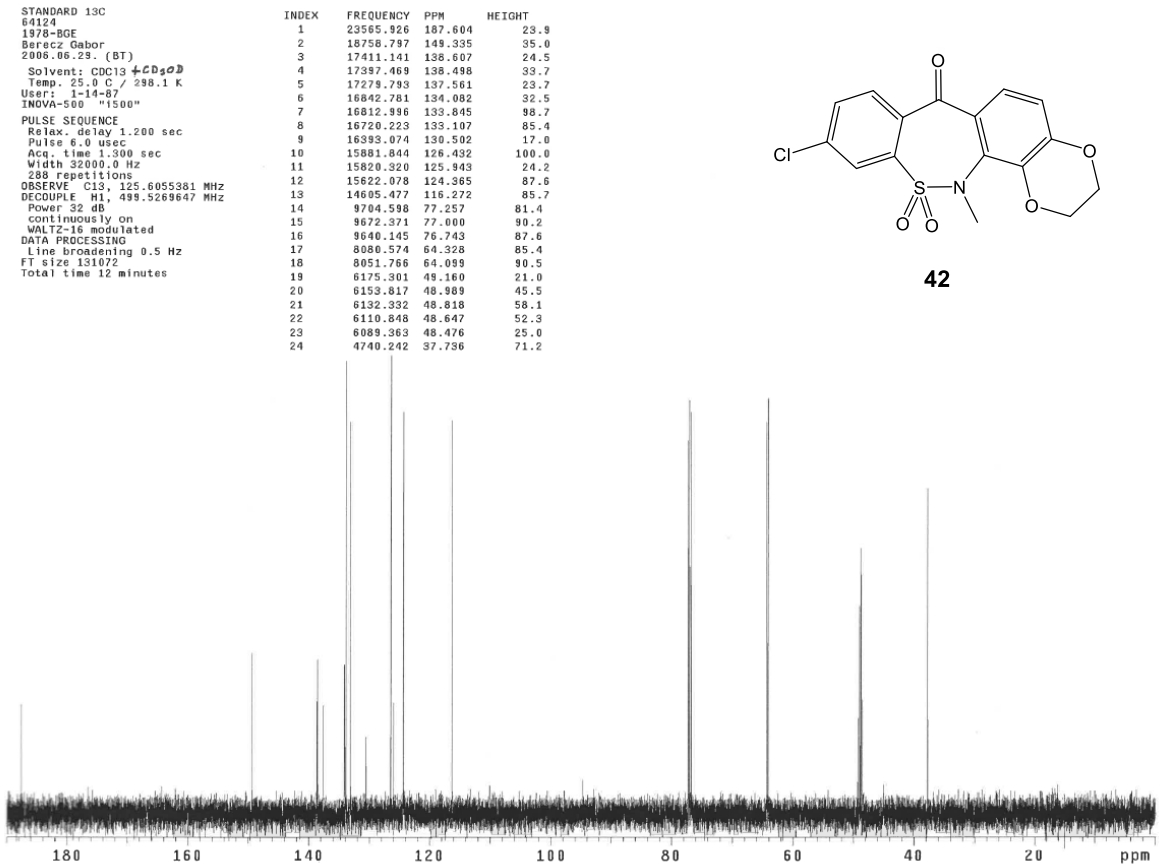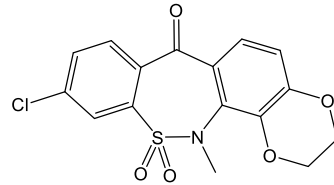

42

GHSQC\_DA (140 Hz)  
 64124  
 1378-BGE  
 Berecz Gabor  
 2006.06.29. (BT)  
 Solvent: CDCl3  
 Temp: 25.0 C / 298.1 K  
 INOVA-500 \*1500  
 PULSE SEQUENCE: ghsqc\_da  
 Relax. delay 1.500 sec  
 Acq. time 0.205 sec  
 Width 5002.2 Hz  
 2D Width 32000.0 Hz  
 2 repetitions  
 2 x 256 increments  
 OBSERVE H1, 499.5244235 MHz  
 DECOUPLE C13, 125.6174312 MHz  
 Power 42 dB  
 on during acquisition  
 off during delay  
 GARP-1 modulated  
 DATA PROCESSING  
 Gauss apodization 0.095 sec  
 F1 DATA PROCESSING  
 Gauss apodization 0.015 sec  
 FT size 2048 x 2048  
 Total time 30 minutes

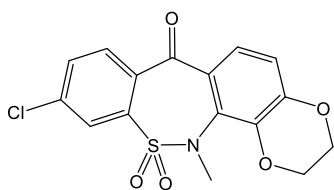

42

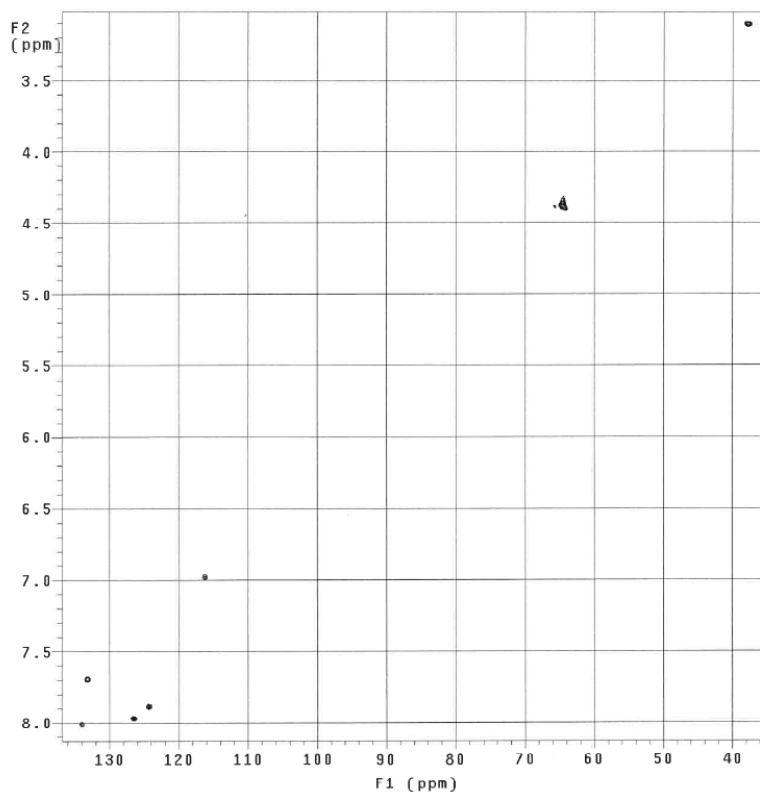

GHMOC\_DA (140Hz, 8Hz)  
 64124  
 1378-BGE  
 Berecz Gabor  
 2006.06.29. (BT)  
 Solvent: CDCl3  
 Temp: 25.0 C / 298.1 K  
 INOVA-500 \*1500  
 PULSE SEQUENCE: ghmqc\_da  
 Relax. delay 1.500 sec  
 Acq. time 0.205 sec  
 Width 5002.2 Hz  
 2D Width 32000.0 Hz  
 4 repetitions  
 256 increments  
 OBSERVE H1, 499.5244235 MHz  
 DATA PROCESSING  
 Sine bell 0.102 sec  
 F1 DATA PROCESSING  
 Sine bell 0.002 sec  
 FT size 4096 x 512  
 Total time 23 minutes

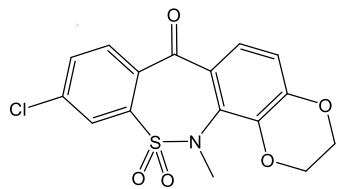

42

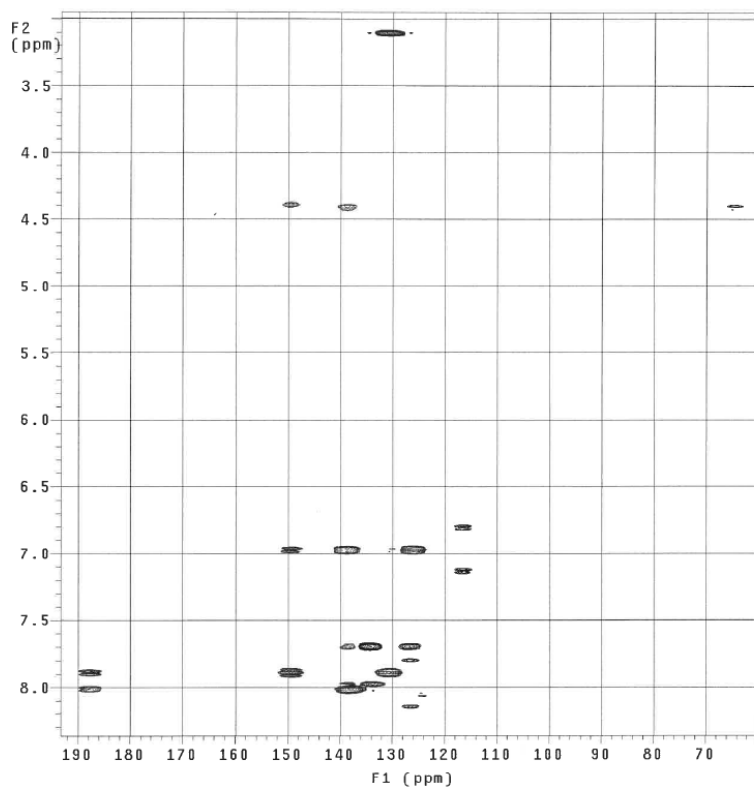

STANDARD 1H  
 64397  
 1979-BGE  
 Berecz Gabor  
 2007.09.20. (BT)  
 Solvent: DMSO  
 Temp. 25.0 C / 298.1 K  
 INOVA-500 "1500"  
 PULSE SEQUENCE  
 Relax. delay 1.000 sec  
 Pulse 6.4 usec  
 Acq. time 5.000 sec  
 Width 11999.4 Hz  
 32 repetitions  
 OBSERVE H1, 499.5268339 MHz  
 DATA PROCESSING  
 FT size 131072  
 Total time 3 minutes

| INDEX | FREQUENCY PPM | HEIGHT |
|-------|---------------|--------|
| 1     | 3960.556      | 7.929  |
| 2     | 3952.317      | 7.912  |
| 3     | 3879.445      | 7.766  |
| 4     | 3858.838      | 7.725  |
| 5     | 3842.642      | 7.693  |
| 6     | 3507.759      | 7.022  |
| 7     | 3459.337      | 7.005  |
| 8     | 3460.337      | 6.927  |
| 9     | 3451.732      | 6.910  |
| 10    | 3281.086      | 6.568  |
| 11    | 3116.482      | 6.239  |
| 12    | 3088.469      | 6.183  |
| 13    | 2859.781      | 5.725  |
| 14    | 2175.917      | 4.956  |
| 15    | 2146.621      | 4.297  |
| 16    | 2137.833      | 4.280  |
| 17    | 2123.185      | 4.250  |
| 18    | 1677.345      | 3.358  |
| 19    | 1664.895      | 3.339  |
| 20    | 1646.951      | 3.297  |
| 21    | 1627.726      | 3.259  |
| 22    | 1251.646      | 2.506  |
| 23    | 1249.815      | 2.502  |
| 24    | 1248.168      | 2.499  |
| 25    | 1036.325      | 2.075  |
| 26    | 0.000         | 0.000  |

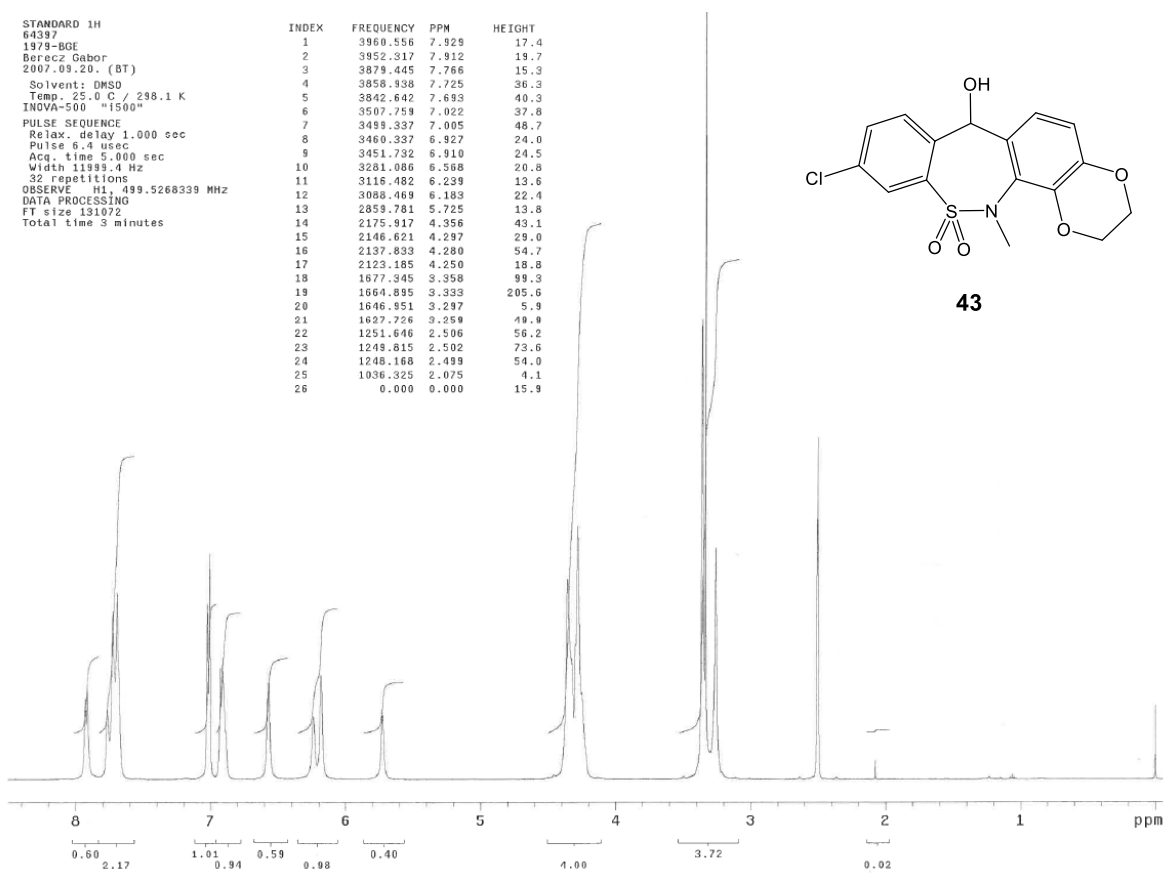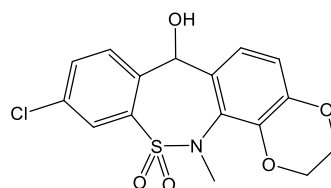

43

STANDARD 13C  
 64397  
 1979-BGE  
 Berecz Gabor  
 2007.09.20. (BT)  
 Solvent: DMSO  
 Temp. 25.0 C / 298.1 K  
 User: 1-14-8  
 INOVA-500 "1500"  
 PULSE SEQUENCE  
 Relax. delay 3.000 sec  
 Pulse 6.0 usec  
 Acq. time 1.300 sec  
 Width 32000.0 Hz  
 15712 repetitions  
 OBSERVE C13, 125.6061592 MHz  
 DECOUPLE H1, 499.529374 MHz  
 Power 32 dB  
 continuously on  
 WALTZ-16 modulated  
 DATA PROCESSING  
 Line broadening 1.0 Hz  
 FT size 131072  
 Total time 18.8 hours

| INDEX | FREQUENCY PPM | HEIGHT  |
|-------|---------------|---------|
| 1     | 18146.872     | 144.405 |
| 2     | 18024.360     | 143.493 |
| 3     | 17789.497     | 141.624 |
| 4     | 17689.887     | 140.831 |
| 5     | 17595.884     | 140.003 |
| 6     | 17351.997     | 138.141 |
| 7     | 17281.665     | 137.421 |
| 8     | 16839.790     | 134.063 |
| 9     | 16810.961     | 133.834 |
| 10    | 16792.641     | 133.449 |
| 11    | 16546.919     | 132.527 |
| 12    | 16616.645     | 132.286 |
| 13    | 16577.583     | 131.975 |
| 14    | 15960.395     | 127.062 |
| 15    | 15908.149     | 126.646 |
| 16    | 15395.942     | 122.568 |
| 17    | 15218.696     | 121.157 |
| 18    | 14784.595     | 117.542 |
| 19    | 14655.708     | 116.675 |
| 20    | 14563.423     | 115.941 |
| 21    | 9472.602      | 75.412  |
| 22    | 8286.567      | 65.970  |
| 23    | 8111.762      | 64.578  |
| 24    | 8049.262      | 64.081  |
| 25    | 5981.470      | 40.295  |
| 26    | 5049.751      | 40.201  |
| 27    | 5040.473      | 40.128  |
| 28    | 5028.755      | 40.034  |
| 29    | 5019.477      | 39.960  |
| 30    | 5007.759      | 39.867  |
| 31    | 4938.481      | 39.793  |
| 32    | 4906.762      | 39.700  |
| 33    | 4905.766      | 39.533  |
| 34    | 4944.770      | 39.366  |
| 35    | 4923.774      | 39.199  |
| 36    | 4886.177      | 38.899  |
| 37    | 4523.872      | 36.015  |

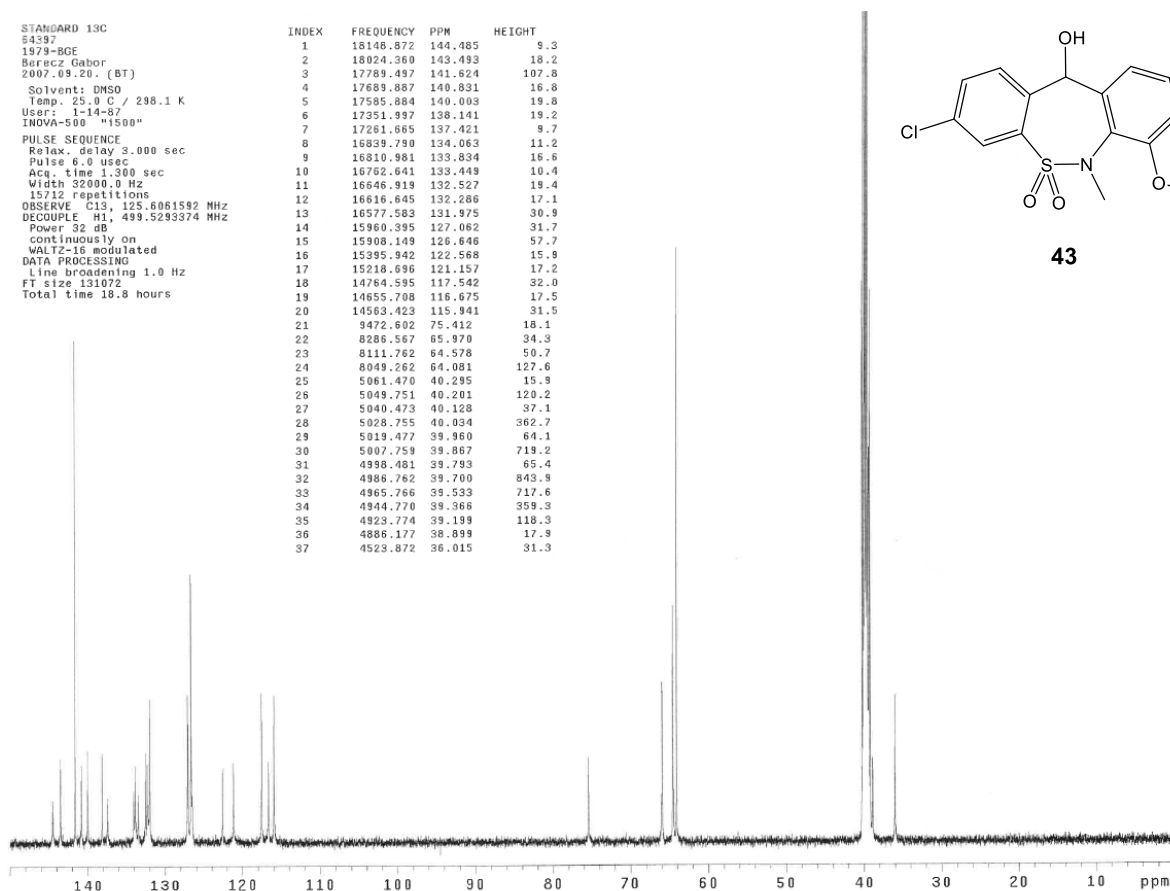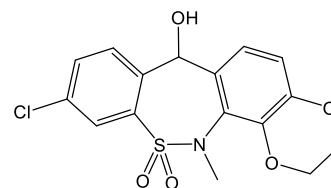

43

STANDARD 1H  
71204  
2122-BGE  
Berez Gabor  
2007.10.08. (BT)  
Solvent: DMSO  
Temp. 25.0 C / 298.1 K  
INOVA-500 "1500"  
PULSE SEQUENCE  
Relax. delay 1.000 sec  
Pulse 6.4 usec  
Acq. time 5.000 sec  
Width 8000.0 Hz  
15 repetitions  
OBSERVE H1, 499.5268326 MHz  
DATA PROCESSING  
FT size 131072  
Total time 1 minutes

| INDEX | FREQUENCY | PPM   | HEIGHT | INDEX | FREQUENCY | PPM    | HEIGHT |
|-------|-----------|-------|--------|-------|-----------|--------|--------|
| 1     | 3874.268  | 7.756 | 47.1   | 40    | 1251.099  | 2.505  | 26.5   |
| 2     | 3865.601  | 7.739 | 6.4    | 41    | 1249.390  | 2.501  | 20.3   |
| 3     | 3857.056  | 7.721 | 16.1   | 42    | 1164.795  | 2.332  | 27.6   |
| 4     | 3847.168  | 7.702 | 12.5   | 43    | 1160.400  | 2.323  | 28.4   |
| 5     | 3838.379  | 7.684 | 5.8    | 44    | 1139.528  | 2.281  | 12.5   |
| 6     | 3833.008  | 7.673 | 14.3   | 45    | 1045.532  | 2.093  | 95.6   |
| 7     | 3831.055  | 7.669 | 14.1   | 46    | 1038.574  | 2.079  | 7.6    |
| 8     | 3824.707  | 7.657 | 19.7   | 47    | 1037.842  | 2.078  | 8.8    |
| 9     | 3822.754  | 7.653 | 19.9   | 48    | 1037.598  | 2.077  | 8.8    |
| 10    | 3791.016  | 7.589 | 30.1   | 49    | 0.977     | 0.002  | 3.2    |
| 11    | 3782.593  | 7.572 | 20.3   | 50    | 0.244     | 0.000  | 5.9    |
| 12    | 3454.468  | 6.915 | 48.1   | 51    | -0.000    | -0.000 | 6.1    |
| 13    | 3441.895  | 6.890 | 52.0   |       |           |        |        |
| 14    | 3439.453  | 6.885 | 55.2   |       |           |        |        |
| 15    | 3431.030  | 6.869 | 7.5    |       |           |        |        |
| 16    | 2562.256  | 5.129 | 7.5    |       |           |        |        |
| 17    | 2553.833  | 5.113 | 7.8    |       |           |        |        |
| 18    | 2334.473  | 4.673 | 37.3   |       |           |        |        |
| 19    | 2198.120  | 4.400 | 6.1    |       |           |        |        |
| 20    | 2186.890  | 4.378 | 13.6   |       |           |        |        |
| 21    | 2184.326  | 4.373 | 13.4   |       |           |        |        |
| 22    | 2180.176  | 4.364 | 11.3   |       |           |        |        |
| 23    | 2170.898  | 4.346 | 14.1   |       |           |        |        |
| 24    | 2168.335  | 4.341 | 13.7   |       |           |        |        |
| 25    | 2165.771  | 4.336 | 15.5   |       |           |        |        |
| 26    | 2163.330  | 4.331 | 18.0   |       |           |        |        |
| 27    | 2155.396  | 4.315 | 21.5   |       |           |        |        |
| 28    | 2145.142  | 4.294 | 25.1   |       |           |        |        |
| 29    | 2143.311  | 4.291 | 26.3   |       |           |        |        |
| 30    | 2138.306  | 4.281 | 18.1   |       |           |        |        |
| 31    | 2135.829  | 4.275 | 21.4   |       |           |        |        |
| 32    | 2133.179  | 4.270 | 19.5   |       |           |        |        |
| 33    | 2125.000  | 4.254 | 12.9   |       |           |        |        |
| 34    | 1682.251  | 3.368 | 148.6  |       |           |        |        |
| 35    | 1670.898  | 3.345 | 19.1   |       |           |        |        |
| 36    | 1665.894  | 3.335 | 77.0   |       |           |        |        |
| 37    | 1619.141  | 3.241 | 61.0   |       |           |        |        |
| 38    | 1502.583  | 3.008 | 4.2    |       |           |        |        |
| 39    | 1252.930  | 2.508 | 19.2   |       |           |        |        |

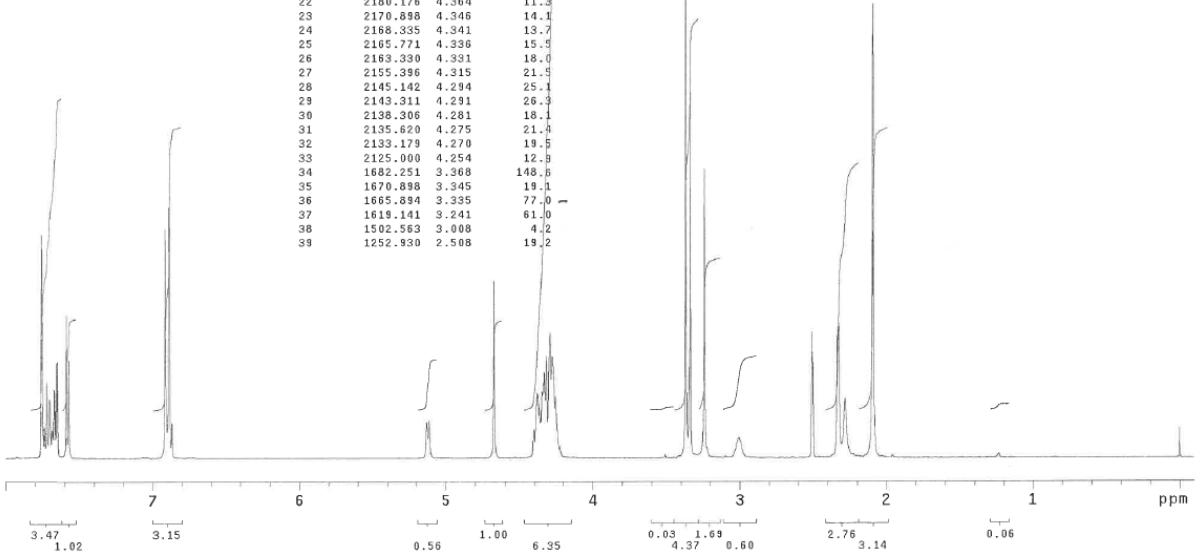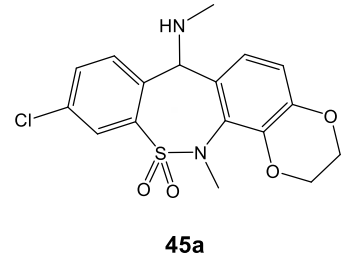

STANDARD 13C  
71204  
2122-BGE  
Berez Gabor  
2007.10.08. (BT)  
Solvent: DMSO  
Temp. 25.0 C / 298.1 K  
User: 1-14-87  
INOVA-500 "1500"  
PULSE SEQUENCE  
Relax. delay 3.000 sec  
Pulse 6.0 usec  
Acq. time 1.300 sec  
Width 32000.0 Hz  
1024 repetitions  
OBSERVE C13, 125.8061597 MHz  
DECOUPLE H1, 499.5293374 MHz  
Power 52 dB  
continuously on  
WALTZ-16 modulated  
DATA PROCESSING  
Line broadening 0.5 Hz  
FT size 131072  
Total time 73 minutes

| INDEX | FREQUENCY | PPM     | HEIGHT | INDEX | FREQUENCY | PPM    | HEIGHT |
|-------|-----------|---------|--------|-------|-----------|--------|--------|
| 1     | 18140.571 | 144.418 | 49.1   | 40    | 4825.141  | 38.413 | 76.6   |
| 2     | 17997.505 | 143.280 | 22.1   | 41    | 4583.442  | 36.469 | 30.6   |
| 3     | 17987.739 | 143.202 | 47.7   | 42    | 4383.735  | 34.899 | 94.2   |
| 4     | 17840.766 | 142.032 | 40.0   | 43    | 4345.161  | 34.592 | 39.1   |
| 5     | 17762.153 | 141.406 | 15.1   |       |           |        |        |
| 6     | 17634.223 | 140.387 | 15.9   |       |           |        |        |
| 7     | 17431.587 | 138.774 | 16.5   |       |           |        |        |
| 8     | 17191.841 | 136.866 | 47.8   |       |           |        |        |
| 9     | 16914.009 | 134.654 | 65.6   |       |           |        |        |
| 10    | 16770.942 | 133.515 | 49.9   |       |           |        |        |
| 11    | 16745.552 | 133.313 | 48.3   |       |           |        |        |
| 12    | 16614.204 | 132.267 | 20.1   |       |           |        |        |
| 13    | 16594.673 | 132.111 | 28.0   |       |           |        |        |
| 14    | 16544.868 | 131.715 | 58.2   |       |           |        |        |
| 15    | 16179.634 | 128.807 | 12.7   |       |           |        |        |
| 16    | 15997.993 | 127.361 | 26.1   |       |           |        |        |
| 17    | 15890.571 | 126.506 | 63.5   |       |           |        |        |
| 18    | 15843.208 | 126.129 | 43.6   |       |           |        |        |
| 19    | 15702.095 | 125.006 | 10.9   |       |           |        |        |
| 20    | 15396.919 | 122.576 | 63.6   |       |           |        |        |
| 21    | 14797.798 | 117.806 | 12.1   |       |           |        |        |
| 22    | 14725.532 | 117.231 | 27.6   |       |           |        |        |
| 23    | 14669.868 | 116.788 | 66.5   |       |           |        |        |
| 24    | 8819.770  | 70.215  | 70.6   |       |           |        |        |
| 25    | 8102.485  | 64.505  | 61.8   |       |           |        |        |
| 26    | 8048.286  | 64.073  | 58.6   |       |           |        |        |
| 27    | 8042.427  | 64.026  | 28.9   |       |           |        |        |
| 28    | 7586.372  | 60.996  | 11.4   |       |           |        |        |
| 29    | 5060.493  | 40.287  | 7.4    |       |           |        |        |
| 30    | 5049.751  | 40.201  | 62.3   |       |           |        |        |
| 31    | 5040.473  | 40.128  | 14.2   |       |           |        |        |
| 32    | 5028.755  | 40.034  | 187.9  |       |           |        |        |
| 33    | 5018.989  | 39.957  | 22.4   |       |           |        |        |
| 34    | 5007.759  | 39.867  | 374.0  |       |           |        |        |
| 35    | 4987.993  | 39.789  | 20.7   |       |           |        |        |
| 36    | 4986.763  | 39.700  | 441.5  |       |           |        |        |
| 37    | 4965.766  | 39.533  | 374.8  |       |           |        |        |
| 38    | 4944.770  | 39.366  | 185.9  |       |           |        |        |
| 39    | 4923.774  | 39.199  | 59.3   |       |           |        |        |

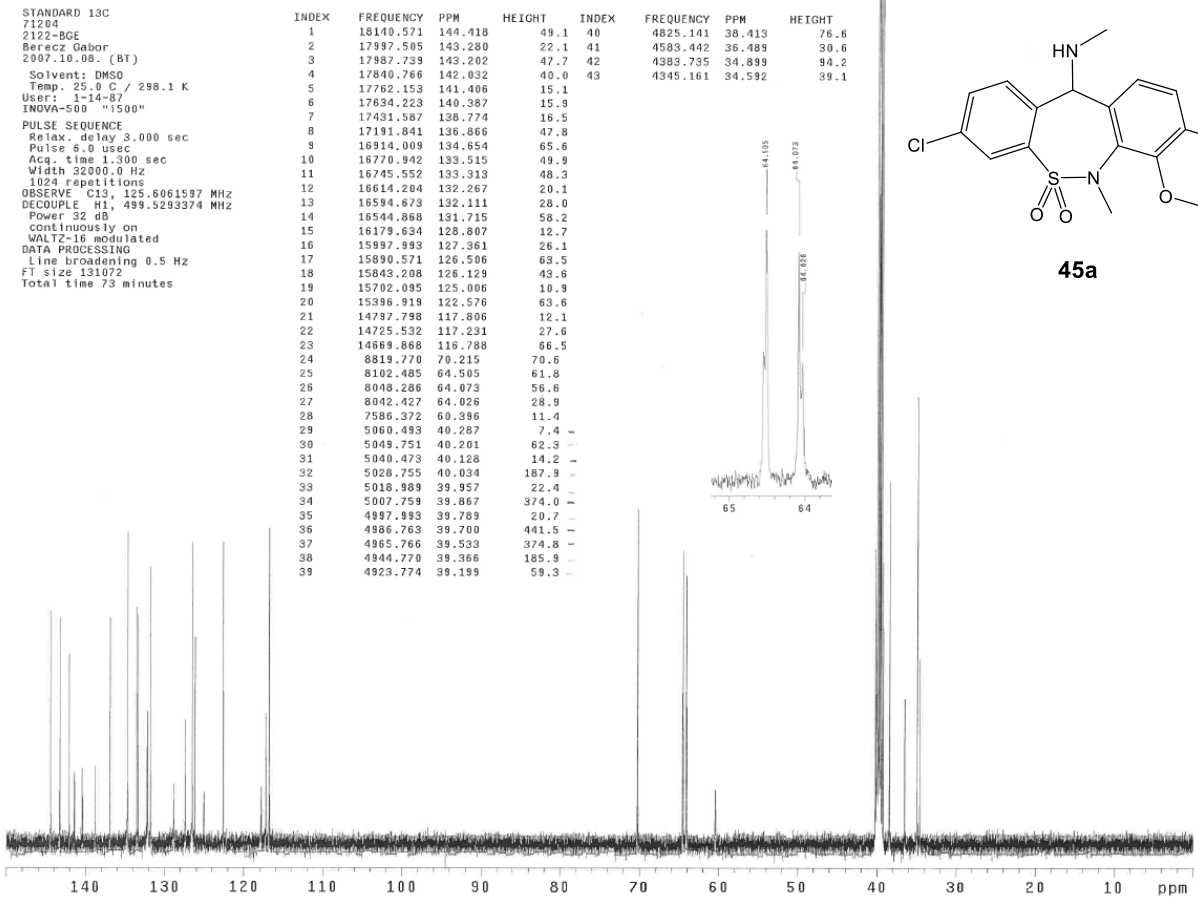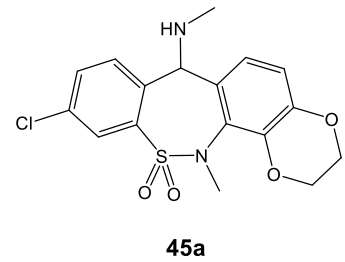

STANDARD 1H  
 64558  
 1982-BQE  
 Berecz Gabor  
 2006.07.24. (BB)  
 Solvent: CDCl3  
 Temp. 25.0 C / 298.1 K  
 INOVA-500 "1500"  
 PULSE SEQUENCE  
 Relax. delay 1.000 sec  
 Pulse 6.4 usec  
 Acq. time 5.000 sec  
 Width 8000.0 Hz  
 16 repetitions  
 OBSERVE H1, 499.5244689 MHz  
 DATA PROCESSING  
 FT size 131072  
 Total time 1 minutes

| INDEX | FREQUENCY | PPM   | HEIGHT | INDEX | FREQUENCY | PPM    | HEIGHT |
|-------|-----------|-------|--------|-------|-----------|--------|--------|
| 1     | 3966.309  | 7.940 | 19.0   | 40    | 1110.962  | 2.224  | 8.2    |
| 2     | 3964.111  | 7.936 | 18.8   | 41    | 1108.765  | 2.220  | 7.6    |
| 3     | 3676.514  | 7.360 | 11.1   | 42    | 1106.567  | 2.215  | 9.1    |
| 4     | 3674.316  | 7.356 | 10.5   | 43    | 1104.248  | 2.211  | 12.3   |
| 5     | 3668.213  | 7.343 | 18.7   | 44    | 1099.976  | 2.202  | 5.1    |
| 6     | 3656.016  | 7.339 | 18.4   | 45    | 1077.393  | 2.157  | 4.7    |
| 7     | 3644.043  | 7.295 | 26.4   | 46    | 1075.928  | 2.154  | 5.0    |
| 8     | 3635.742  | 7.278 | 16.0   | 47    | 1071.045  | 2.104  | 12.4   |
| 9     | 3629.395  | 7.266 | 2.1    | 48    | 1069.092  | 2.140  | 9.3    |
| 10    | 3628.418  | 7.264 | 7.1    | 49    | 1064.697  | 2.131  | 8.2    |
| 11    | 3395.508  | 6.797 | 20.7   | 50    | 1062.134  | 2.126  | 8.2    |
| 12    | 3387.085  | 6.781 | 37.2   | 51    | 1057.617  | 2.117  | 3.5    |
| 13    | 3367.676  | 6.742 | 30.8   | 52    | 848.633   | 1.699  | 1.7    |
| 14    | 3359.151  | 6.725 | 17.0   | 53    | 844.116   | 1.690  | 2.9    |
| 15    | 2199.219  | 4.403 | 2.3    | 54    | 840.576   | 1.683  | 14.2   |
| 16    | 2195.435  | 4.395 | 3.8    | 55    | 836.792   | 1.675  | 20.8   |
| 17    | 2194.458  | 4.393 | 3.9    | 56    | 834.106   | 1.670  | 41.1   |
| 18    | 2190.796  | 4.386 | 3.4    | 57    | 831.543   | 1.665  | 19.7   |
| 19    | 2187.622  | 4.379 | 6.9    | 58    | 827.759   | 1.657  | 12.0   |
| 20    | 2184.204  | 4.373 | 9.2    | 59    | 819.846   | 1.641  | 1.6    |
| 21    | 2182.739  | 4.370 | 10.3   | 60    | 814.331   | 1.630  | 6.4    |
| 22    | 2179.585  | 4.363 | 9.0    | 61    | 0.977     | 0.002  | 2.3    |
| 23    | 2176.636  | 4.357 | 6.5    | 62    | -0.000    | -0.000 | 6.1    |
| 24    | 2172.852  | 4.350 | 14.1   |       |           |        |        |
| 25    | 2168.579  | 4.341 | 9.9    |       |           |        |        |
| 26    | 2165.039  | 4.334 | 2.2    |       |           |        |        |
| 27    | 2161.193  | 4.326 | 5.3    |       |           |        |        |
| 28    | 2157.267  | 4.319 | 4.4    |       |           |        |        |
| 29    | 2151.001  | 4.308 | 1.9    |       |           |        |        |
| 30    | 2149.414  | 4.303 | 1.9    |       |           |        |        |
| 31    | 2142.822  | 4.290 | 20.7   |       |           |        |        |
| 32    | 2138.794  | 4.282 | 27.2   |       |           |        |        |
| 33    | 2135.132  | 4.274 | 11.6   |       |           |        |        |
| 34    | 2017.700  | 4.039 | 32.0   |       |           |        |        |
| 35    | 1790.591  | 3.464 | 1.6    |       |           |        |        |
| 36    | 1717.773  | 3.439 | 1.6    |       |           |        |        |
| 37    | 1710.327  | 3.424 | 163.4  |       |           |        |        |
| 38    | 1119.263  | 2.241 | 3.2    |       |           |        |        |
| 39    | 1113.281  | 2.229 | 8.2    |       |           |        |        |

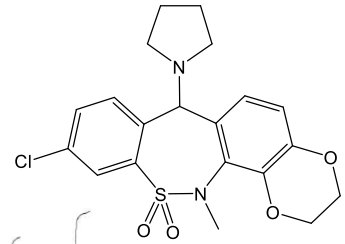

45b

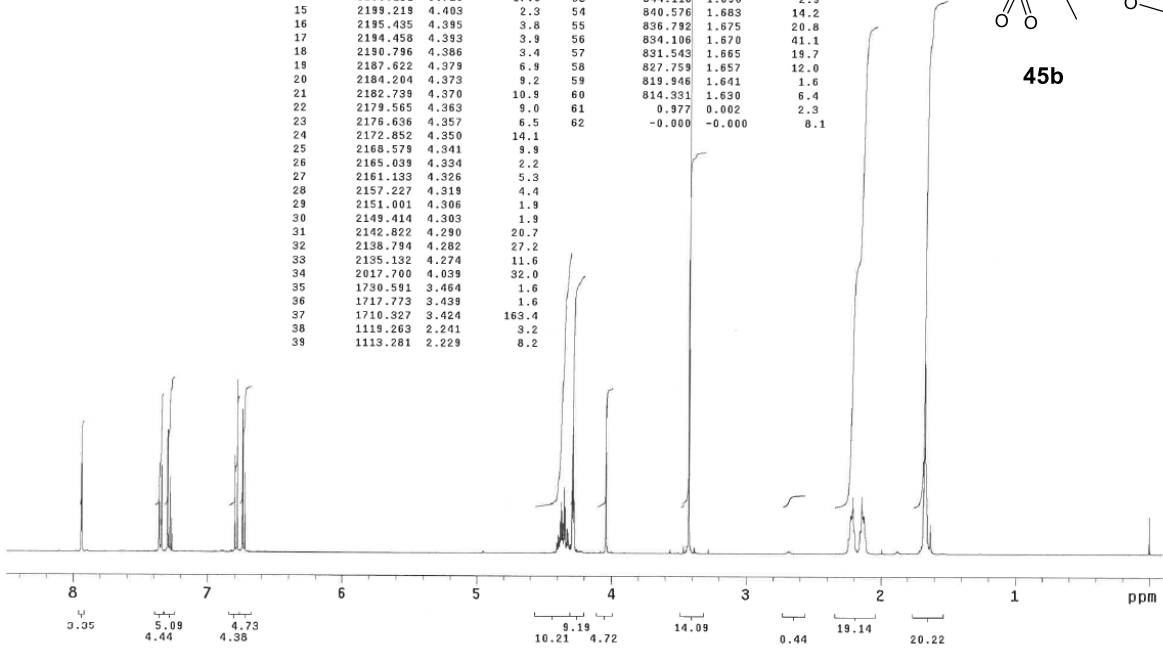

STANDARD 13C  
 64558  
 1982-BQE  
 Berecz Gabor  
 2006.07.24. (BB)  
 Solvent: CDCl3  
 Temp. 25.0 C / 298.1 K  
 User: 1-14-87  
 INOVA-500 "1500"  
 PULSE SEQUENCE  
 Relax. delay 3.000 sec  
 Pulse 6.0 usec  
 Acq. time 1.300 sec  
 Width 27220.1 Hz  
 102 repetitions  
 OBSERVE C13, 125.6055333 MHz  
 DECOUPLE H1, 499.5269647 MHz  
 Power 32 dB  
 continuously on  
 WALTZ-16 modulated  
 DATA PROCESSING  
 Line broadening 1.0 Hz  
 FT size 131072  
 Total time 7 minutes

| INDEX | FREQUENCY | PPM     | HEIGHT |
|-------|-----------|---------|--------|
| 1     | 18160.806 | 144.575 | 19.1   |
| 2     | 18019.588 | 143.451 | 17.6   |
| 3     | 17881.277 | 142.350 | 15.2   |
| 4     | 17038.395 | 135.644 | 23.0   |
| 5     | 16935.118 | 134.817 | 24.6   |
| 6     | 16928.473 | 134.765 | 22.0   |
| 7     | 16713.323 | 133.052 | 46.4   |
| 8     | 16440.441 | 130.879 | 43.5   |
| 9     | 16090.304 | 128.092 | 46.4   |
| 10    | 15785.024 | 125.662 | 15.5   |
| 11    | 15235.521 | 121.287 | 45.0   |
| 12    | 14712.600 | 117.124 | 46.6   |
| 13    | 9704.353  | 77.255  | 64.8   |
| 14    | 9672.371  | 77.000  | 66.0   |
| 15    | 9640.389  | 76.745  | 65.0   |
| 16    | 9613.807  | 76.534  | 43.2   |
| 17    | 8099.039  | 64.475  | 44.2   |
| 18    | 8053.350  | 64.111  | 43.0   |
| 19    | 6739.194  | 53.650  | 86.2   |
| 20    | 4787.482  | 38.112  | 33.9   |
| 21    | 2909.700  | 23.164  | 89.6   |

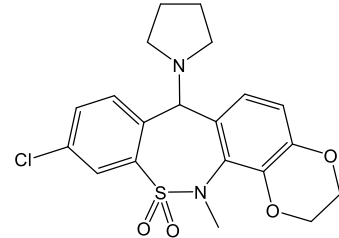

45b

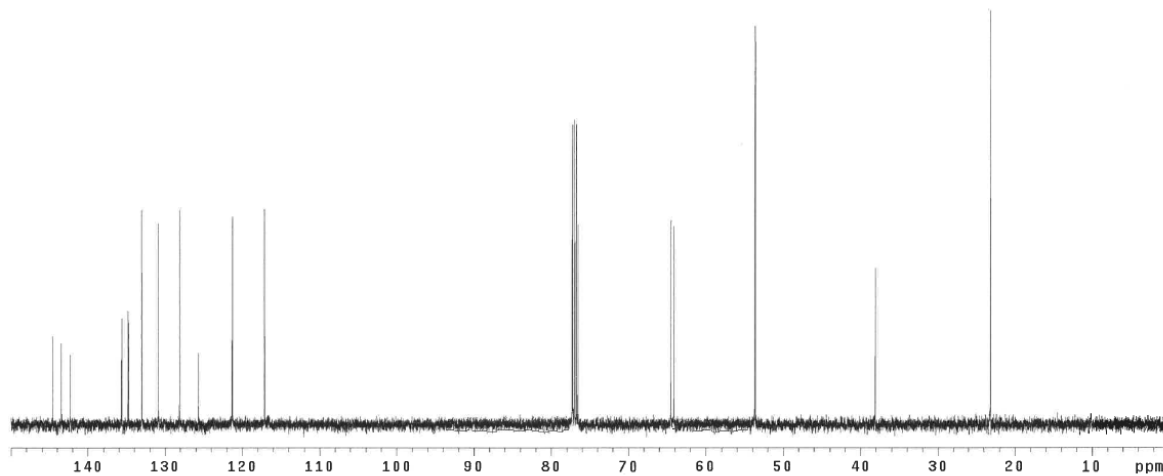

STANDARD 1H  
 66309  
 2025-BGE  
 Berecz Gabor  
 2006.11.14. (BB)  
 Solvent: DMSO  
 Temp. 25.0 C / 298.1 K  
 INOVA-500 "1500"  
 PULSE SEQUENCE  
 Relax. delay 1.000 sec  
 Pulse 6.4 usec  
 Acq. time 5.000 sec  
 Width 8000.0 Hz  
 16 repetitions  
 OBSERVE H1, 499.5268317 MHz  
 DATA PROCESSING  
 FT size 131072  
 Total time 1 minutes

| INDEX | FREQUENCY PPM | HEIGHT | INDEX | FREQUENCY PPM | HEIGHT   |       |     |
|-------|---------------|--------|-------|---------------|----------|-------|-----|
| 1     | 3881.470      | 7.770  | 24.0  | 40            | 1017.822 | 2.038 | 5.6 |
| 2     | 3879.272      | 7.766  | 24.7  | 41            | 1014.160 | 2.030 | 3.4 |
| 3     | 3820.923      | 7.649  | 11.8  | 42            | 1006.226 | 2.014 | 3.1 |
| 4     | 3818.726      | 7.645  | 10.5  | 43            | 929.932  | 1.862 | 3.3 |
| 5     | 3812.622      | 7.632  | 18.1  | 44            | 920.166  | 1.842 | 6.1 |
| 6     | 3810.393      | 7.628  | 17.5  | 45            | 918.457  | 1.839 | 6.0 |
| 7     | 3783.813      | 7.575  | 23.6  | 46            | 913.696  | 1.829 | 3.6 |
| 8     | 3775.391      | 7.558  | 15.1  | 47            | 911.011  | 1.824 | 4.4 |
| 9     | 3596.191      | 7.199  | 10.1  | 48            | 909.180  | 1.820 | 4.5 |
| 10    | 3441.284      | 6.889  | 11.0  | 49            | 901.855  | 1.805 | 6.3 |
| 11    | 3432.861      | 6.872  | 47.2  | 50            | 899.658  | 1.801 | 6.1 |
| 12    | 3428.589      | 6.864  | 37.6  | 51            | 890.137  | 1.782 | 3.6 |
| 13    | 3420.166      | 6.847  | 8.6   | 52            | 804.565  | 1.611 | 5.8 |
| 14    | 3357.300      | 6.721  | 10.0  | 53            | 800.659  | 1.603 | 5.4 |
| 15    | 2203.369      | 4.411  | 3.4   | 54            | 793.945  | 1.589 | 7.0 |
| 16    | 2198.853      | 4.402  | 4.4   | 55            | 791.260  | 1.584 | 7.6 |
| 17    | 2197.510      | 4.399  | 4.9   | 56            | 730.835  | 1.463 | 3.6 |
| 18    | 2194.214      | 4.393  | 4.8   | 57            | 727.539  | 1.456 | 4.0 |
| 19    | 2188.354      | 4.381  | 8.3   | 58            | 717.529  | 1.436 | 4.5 |
| 20    | 2158.569      | 4.321  | 14.6  | 59            | 704.712  | 1.411 | 4.6 |
| 21    | 2159.757      | 4.306  | 15.2  | 60            | 695.190  | 1.392 | 3.5 |
| 22    | 2149.414      | 4.303  | 11.9  | 61            | 692.261  | 1.386 | 3.1 |
| 23    | 2142.578      | 4.289  | 3.1   |               |          |       |     |
| 24    | 2127.808      | 4.260  | 34.8  |               |          |       |     |
| 25    | 2122.314      | 4.249  | 5.3   |               |          |       |     |
| 26    | 2118.896      | 4.242  | 5.1   |               |          |       |     |
| 27    | 2113.281      | 4.231  | 3.3   |               |          |       |     |
| 28    | 1684.448      | 3.372  | 123.9 |               |          |       |     |
| 29    | 1665.405      | 3.334  | 71.2  |               |          |       |     |
| 30    | 1255.615      | 2.514  | 7.1   |               |          |       |     |
| 31    | 1253.784      | 2.510  | 9.7   |               |          |       |     |
| 32    | 1251.953      | 2.506  | 11.1  |               |          |       |     |
| 33    | 1250.122      | 2.503  | 8.1   |               |          |       |     |
| 34    | 1248.291      | 2.499  | 5.3   |               |          |       |     |
| 35    | 1244.263      | 2.491  | 4.8   |               |          |       |     |
| 36    | 1145.142      | 2.292  | 4.5   |               |          |       |     |
| 37    | 1134.399      | 2.271  | 5.0   |               |          |       |     |
| 38    | 1038.086      | 2.078  | 4.9   |               |          |       |     |
| 39    | 1021.606      | 2.045  | 3.8   |               |          |       |     |

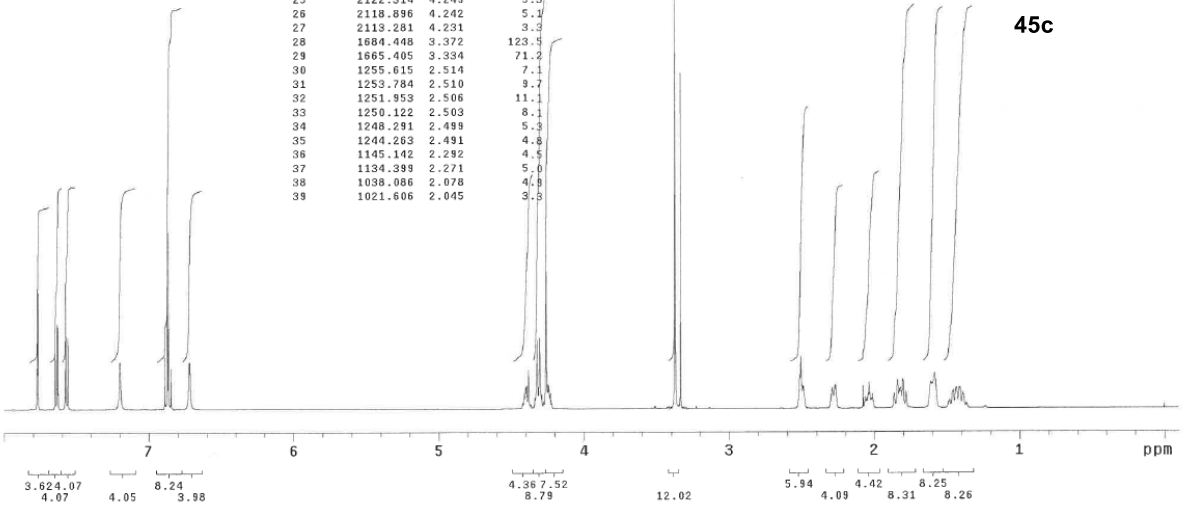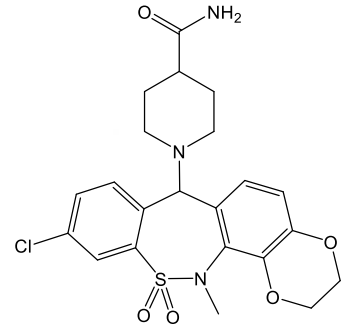

45c

STANDARD 13C  
 66309  
 2025-BGE  
 Berecz Gabor  
 2006.11.14. (BB)  
 Solvent: DMSO  
 Temp. 25.0 C / 298.1 K  
 User: 1-14-07  
 INOVA-500 "1500"  
 PULSE SEQUENCE  
 Relax. delay 3.000 sec  
 Pulse 6.0 usec  
 Acq. time 1.300 sec  
 Width 32000.0 Hz  
 1024 repetitions  
 OBSERVE C13, 125.6061597 MHz  
 DECOUPLE H1, 499.5293374 MHz  
 Power 32 dB  
 continuous ly on  
 WALTZ-16 modulated  
 DATA PROCESSING  
 Line broadening 0.5 Hz  
 FT size 131072  
 Total time 73 minutes

| INDEX | FREQUENCY PPM | HEIGHT  |       |
|-------|---------------|---------|-------|
| 1     | 22172.798     | 176.519 | 84.8  |
| 2     | 18155.220     | 144.535 | 77.0  |
| 3     | 18017.036     | 143.435 | 67.9  |
| 4     | 17904.731     | 142.541 | 63.0  |
| 5     | 16970.649     | 135.105 | 55.0  |
| 6     | 16962.837     | 135.042 | 65.4  |
| 7     | 16826.118     | 133.354 | 69.6  |
| 8     | 16817.329     | 133.884 | 69.0  |
| 9     | 16508.247     | 131.423 | 55.9  |
| 10    | 15991.645     | 127.311 | 57.3  |
| 11    | 15706.001     | 125.037 | 74.9  |
| 12    | 15359.321     | 122.277 | 59.4  |
| 13    | 14710.395     | 117.111 | 62.4  |
| 14    | 9464.302      | 75.346  | 70.7  |
| 15    | 8104.438      | 64.520  | 48.6  |
| 16    | 8048.286      | 64.073  | 46.2  |
| 17    | 6549.751      | 52.143  | 36.5  |
| 18    | 6508.735      | 51.817  | 43.2  |
| 19    | 5221.626      | 41.570  | 28.9  |
| 20    | 5049.751      | 40.201  | 71.1  |
| 21    | 5028.755      | 40.034  | 227.2 |
| 22    | 5018.989      | 39.957  | 16.1  |
| 23    | 5007.759      | 39.867  | 453.5 |
| 24    | 4888.763      | 39.700  | 537.0 |
| 25    | 4865.766      | 39.533  | 455.6 |
| 26    | 4944.770      | 39.366  | 228.6 |
| 27    | 4923.774      | 39.199  | 74.2  |
| 28    | 4860.766      | 38.697  | 90.8  |
| 29    | 3623.970      | 28.851  | 41.5  |
| 30    | 3565.376      | 28.384  | 47.2  |

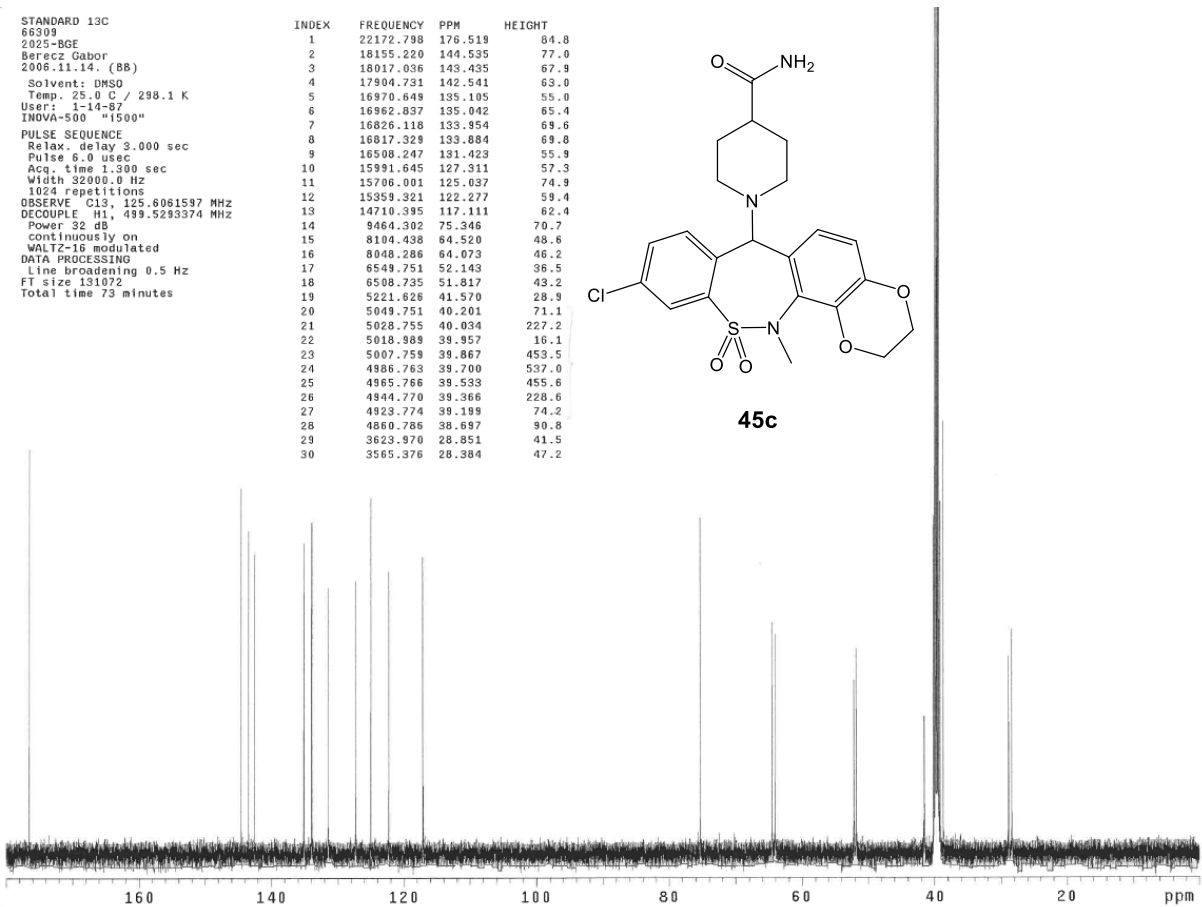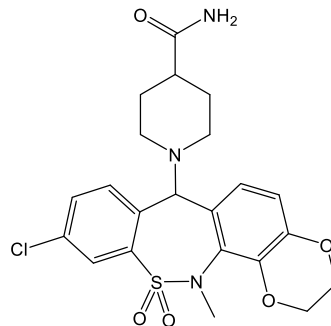

45c



STANDARD 1H  
 64557  
 1981-BGE  
 Berecz Gabor  
 2006.07.24. (BB)  
 Solvent: CDC13  
 Temp: 25.0 C / 298.1 K  
 INOVA-500 "1500"  
 PULSE SEQUENCE  
 Relax. delay 1.000 sec  
 Pulse 6.4 usec  
 Acq. time 5.000 sec  
 Width 8000.0 Hz  
 16 repetitions  
 OBSERVE H1, 499.5244693 MHz  
 DATA PROCESSING  
 FT size 131072  
 Total time 1 minutes

2 konformer

| INDEX | FREQUENCY | PPM    | HEIGHT |
|-------|-----------|--------|--------|
| 1     | 3978.760  | 7.965  | 18.8   |
| 2     | 3931.763  | 7.871  | 12.5   |
| 3     | 3932.007  | 7.871  | 12.5   |
| 4     | 3857.300  | 7.722  | 9.6    |
| 5     | 3849.365  | 7.706  | 10.7   |
| 6     | 3723.388  | 7.454  | 13.3   |
| 7     | 3716.553  | 7.440  | 22.0   |
| 8     | 3707.031  | 7.421  | 16.4   |
| 9     | 3692.383  | 7.392  | 19.9   |
| 10    | 3684.082  | 7.375  | 12.5   |
| 11    | 3627.319  | 7.262  | 23.6   |
| 12    | 3429.443  | 6.865  | 56.3   |
| 13    | 3421.921  | 6.849  | 53.6   |
| 14    | 2873.901  | 5.753  | 17.4   |
| 15    | 2641.846  | 5.289  | 4.4    |
| 16    | 2498.657  | 5.002  | 26.8   |
| 17    | 2174.927  | 4.354  | 51.7   |
| 18    | 2143.677  | 4.291  | 42.3   |
| 19    | 2137.329  | 4.279  | 42.6   |
| 20    | 1790.039  | 3.583  | 52.1   |
| 21    | 1746.460  | 3.496  | 11.8   |
| 22    | 1739.380  | 3.482  | 50.2   |
| 23    | 1736.572  | 3.476  | 53.0   |
| 24    | 1732.422  | 3.468  | 43.6   |
| 25    | 1725.464  | 3.454  | 15.2   |
| 26    | 1685.547  | 3.374  | 81.7   |
| 27    | 1610.474  | 3.224  | 81.7   |
| 28    | 821.899   | 1.645  | 35.0   |
| 29    | 608.521   | 1.218  | 16.5   |
| 30    | 601.562   | 1.204  | 32.5   |
| 31    | 594.482   | 1.190  | 16.0   |
| 32    | -0.000    | -0.000 | 25.9   |

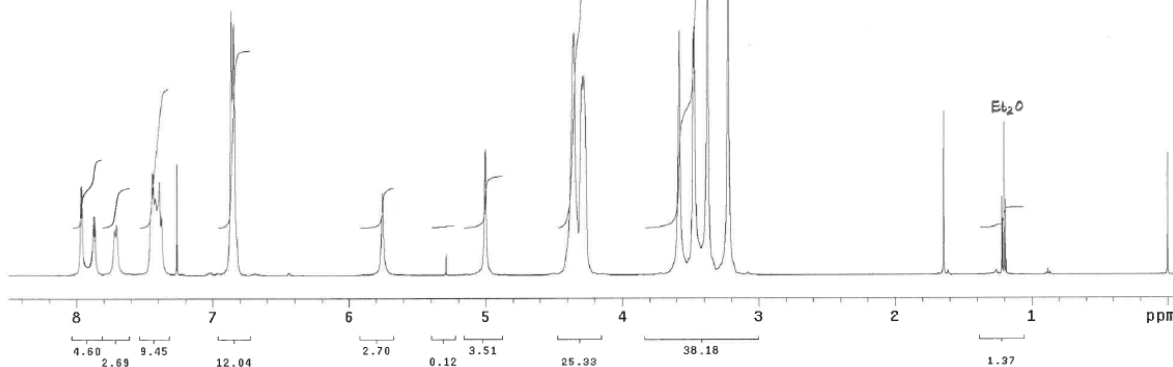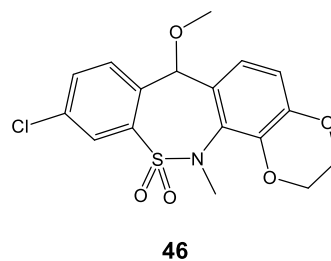

STANDARD 13C  
 64557  
 1981-BGE  
 Berecz Gabor  
 2006.07.24. (BB)  
 Solvent: CDC13  
 Temp: 25.0 C / 298.1 K  
 User: 1-14-07  
 INOVA-500 "1500"  
 PULSE SEQUENCE  
 Relax. delay 3.000 sec  
 Pulse 6.0 usec  
 Acq. time 1.300 sec  
 Width 27220.1 Hz  
 823 repetitions  
 OBSERVE C13, 125.6055354 MHz  
 DECOUPLE H1, 499.5269647 MHz  
 Power: 32 dB  
 continuously on  
 WALTZ-16 modulated  
 DATA PROCESSING  
 Line broadening 4.0 Hz  
 FT size 131072  
 Total time 58 minutes

| INDEX | FREQUENCY | PPM     | HEIGHT |
|-------|-----------|---------|--------|
| 1     | 18252.597 | 145.306 | 18.0   |
| 2     | 18071.922 | 143.867 | 11.5   |
| 3     | 17911.598 | 142.591 | 16.9   |
| 4     | 17675.047 | 142.300 | 18.9   |
| 5     | 17578.905 | 139.942 | 10.6   |
| 6     | 17269.888 | 137.482 | 13.8   |
| 7     | 17022.341 | 135.512 | 21.7   |
| 8     | 16994.098 | 135.287 | 15.2   |
| 9     | 16815.083 | 133.862 | 15.6   |
| 10    | 16754.858 | 133.382 | 50.6   |
| 11    | 16531.817 | 131.607 | 58.5   |
| 12    | 16470.761 | 131.121 | 22.0   |
| 13    | 16078.259 | 127.996 | 59.3   |
| 14    | 15853.141 | 126.204 | 14.7   |
| 15    | 15755.119 | 125.424 | 33.8   |
| 16    | 15460.639 | 123.079 | 11.0   |
| 17    | 15341.019 | 122.127 | 48.3   |
| 18    | 14822.251 | 117.997 | 33.8   |
| 19    | 14695.986 | 116.992 | 50.5   |
| 20    | 14496.620 | 115.405 | 32.6   |
| 21    | 10968.667 | 87.320  | 47.5   |
| 22    | 9704.353  | 77.255  | 255.8  |
| 23    | 9672.371  | 77.000  | 259.9  |
| 24    | 9640.389  | 76.745  | 288.6  |
| 25    | 8261.439  | 65.768  | 9.4    |
| 26    | 8098.208  | 64.468  | 90.8   |
| 27    | 8052.520  | 64.105  | 167.0  |
| 28    | 7942.693  | 63.454  | 30.1   |
| 29    | 7134.684  | 56.797  | 45.3   |
| 30    | 4812.818  | 38.314  | 37.5   |
| 31    | 4483.033  | 35.689  | 26.6   |
| 32    | 1911.208  | 15.215  | 8.6    |

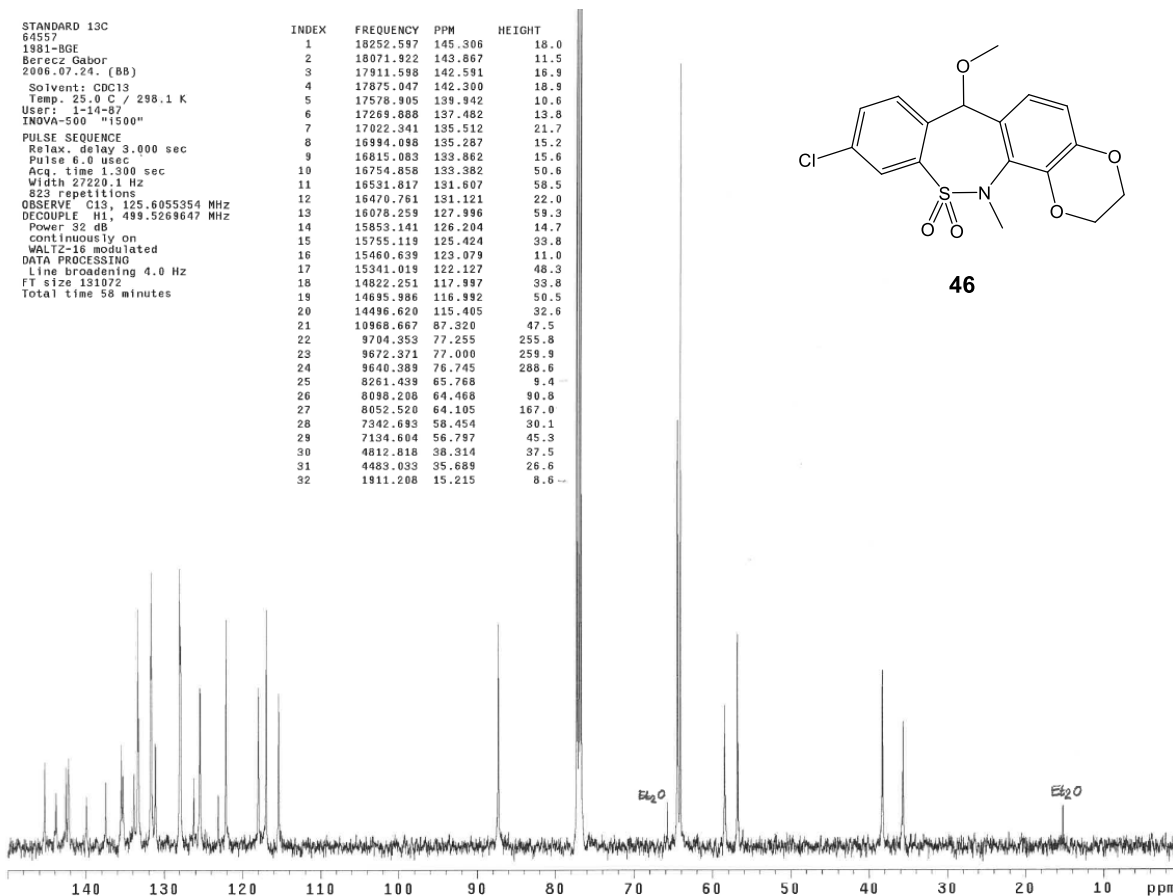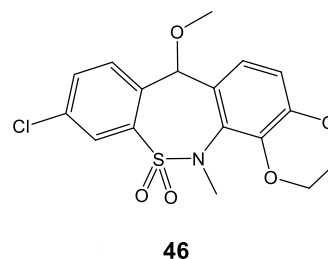

STANDARD PROTON PARAMETERS  
 57140  
 1825-BGE  
 Berecz Gabor  
 2005.03.11. (BT)  
 Solvent: CDCl3  
 Temp. 25.0 C / 298.1 K  
 INOVA-500 "1500"  
 PULSE SEQUENCE  
 Relax. delay 3.000 sec  
 Pulse 30.0 degrees  
 Acq. time 5.000 sec  
 Width 8000.0 Hz  
 16 repetitions  
 OBSERVE H1, 499.5244670 MHz  
 DATA PROCESSING  
 FT size 131072  
 Total time 2 minutes

| INDEX | FREQUENCY | PPM    | HEIGHT | INDEX | FREQUENCY | PPM   | HEIGHT |
|-------|-----------|--------|--------|-------|-----------|-------|--------|
| 1     | 5302.612  | 10.615 | 21.5   | 40    | 3419.678  | 6.846 | 57.4   |
| 2     | 3960.938  | 7.929  | 23.2   | 41    | 2643.921  | 5.293 | 9.2    |
| 3     | 3960.571  | 7.929  | 20.5   | 42    | 2130.859  | 4.266 | 13.7   |
| 4     | 3959.229  | 7.926  | 25.0   | 43    | 2129.639  | 4.263 | 16.2   |
| 5     | 3958.862  | 7.925  | 20.3   | 44    | 2127.563  | 4.259 | 41.0   |
| 6     | 3952.881  | 7.913  | 24.6   | 45    | 2125.977  | 4.256 | 24.0   |
| 7     | 3952.515  | 7.913  | 22.2   | 46    | 2124.146  | 4.252 | 41.5   |
| 8     | 3951.294  | 7.910  | 25.1   | 47    | 2122.559  | 4.249 | 51.3   |
| 9     | 3950.928  | 7.909  | 20.4   | 48    | 2121.948  | 4.248 | 49.7   |
| 10    | 3833.130  | 7.674  | 21.9   | 49    | 2115.479  | 4.235 | 51.6   |
| 11    | 3832.764  | 7.673  | 21.3   | 50    | 2114.868  | 4.234 | 47.0   |
| 12    | 3832.051  | 7.671  | 23.6   | 51    | 2113.281  | 4.231 | 41.9   |
| 13    | 3824.707  | 7.657  | 26.2   | 52    | 2111.450  | 4.227 | 24.7   |
| 14    | 3824.341  | 7.656  | 25.6   | 53    | 2109.863  | 4.224 | 41.8   |
| 15    | 3823.608  | 7.654  | 27.1   | 54    | 2107.788  | 4.220 | 16.4   |
| 16    | 3727.783  | 7.463  | 12.8   | 55    | 2106.567  | 4.217 | 13.2   |
| 17    | 3726.196  | 7.459  | 13.3   | 56    | 1939.087  | 3.882 | 406.2  |
| 18    | 3720.459  | 7.448  | 14.7   | 57    | 824.463   | 1.650 | 9.6    |
| 19    | 3720.215  | 7.448  | 14.0   | 58    | 0.000     | 0.000 | 18.2   |
| 20    | 3718.994  | 7.445  | 20.9   |       |           |       |        |
| 21    | 3717.773  | 7.443  | 12.5   |       |           |       |        |
| 22    | 3712.036  | 7.431  | 12.1   |       |           |       |        |
| 23    | 3710.449  | 7.428  | 12.2   |       |           |       |        |
| 24    | 3687.134  | 7.381  | 47.2   |       |           |       |        |
| 25    | 3684.937  | 7.377  | 64.1   |       |           |       |        |
| 26    | 3672.974  | 7.353  | 42.3   |       |           |       |        |
| 27    | 3670.654  | 7.348  | 31.4   |       |           |       |        |
| 28    | 3664.429  | 7.336  | 42.9   |       |           |       |        |
| 29    | 3662.199  | 7.331  | 36.1   |       |           |       |        |
| 30    | 3629.761  | 7.266  | 15.2   |       |           |       |        |
| 31    | 3517.354  | 7.041  | 18.9   |       |           |       |        |
| 32    | 3516.235  | 7.039  | 20.0   |       |           |       |        |
| 33    | 3510.010  | 7.027  | 22.6   |       |           |       |        |
| 34    | 3508.399  | 7.025  | 26.3   |       |           |       |        |
| 35    | 3508.911  | 7.025  | 24.0   |       |           |       |        |
| 36    | 3508.301  | 7.023  | 20.6   |       |           |       |        |
| 37    | 3502.075  | 7.011  | 18.6   |       |           |       |        |
| 38    | 3500.977  | 7.009  | 17.4   |       |           |       |        |
| 39    | 3428.223  | 6.863  | 61.0   |       |           |       |        |

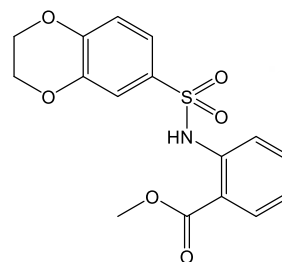

48

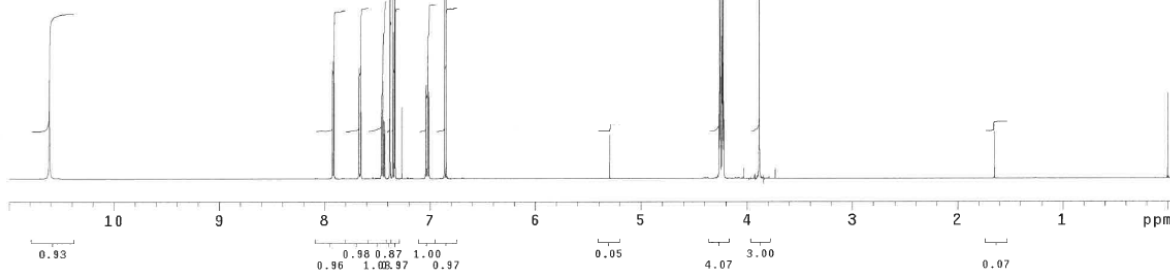

STANDARD CARBON PARAMETERS  
 57140  
 1825-BGE  
 Berecz Gabor  
 2005.03.11. (BT)  
 Solvent: CDCl3  
 Temp. 25.0 C / 298.1 K  
 User: 1-14-07  
 INOVA-500 "1500"  
 PULSE SEQUENCE  
 Relax. delay 3.000 sec  
 Pulse 45.0 degrees  
 Acq. time 1.300 sec  
 Width 32000.0 Hz  
 240 repetitions  
 OBSERVE C13, 125.6055337 MHz  
 DECOUPLE H1, 499.5269647 MHz  
 Power 32 dB  
 continuously on  
 WALTZ-16 modulated  
 DATA PROCESSING  
 Line broadening 0.5 Hz  
 FT size 131072  
 Total time 17 minutes

| INDEX | FREQUENCY | PPM     | HEIGHT |
|-------|-----------|---------|--------|
| 1     | 21134.285 | 168.246 | 50.8   |
| 2     | 18543.953 | 147.625 | 60.8   |
| 3     | 18013.191 | 143.400 | 65.5   |
| 4     | 17846.004 | 140.477 | 57.7   |
| 5     | 16888.679 | 134.448 | 143.0  |
| 6     | 16545.418 | 131.715 | 37.6   |
| 7     | 16467.293 | 131.093 | 146.4  |
| 8     | 15906.746 | 122.650 | 152.1  |
| 9     | 15884.344 | 120.959 | 162.5  |
| 10    | 14911.140 | 118.705 | 96.2   |
| 11    | 14772.469 | 117.601 | 166.7  |
| 12    | 14679.695 | 116.862 | 147.8  |
| 13    | 14529.304 | 115.665 | 39.0   |
| 14    | 9704.109  | 77.253  | 94.8   |
| 15    | 9672.371  | 77.000  | 98.9   |
| 16    | 9540.144  | 76.743  | 95.4   |
| 17    | 8082.781  | 64.425  | 148.6  |
| 18    | 8043.465  | 64.033  | 148.8  |
| 19    | 6983.504  | 52.410  | 105.5  |

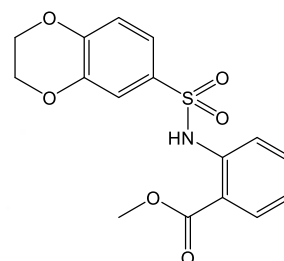

48

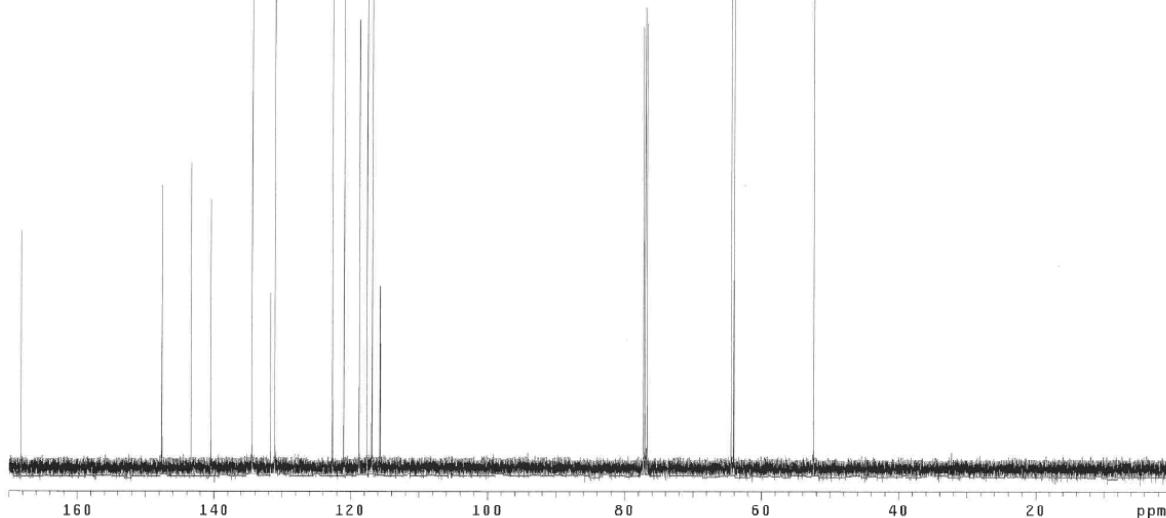

STANDARD PROTON PARAMETERS  
 57243  
 1830-BGE  
 Berecz Gabor  
 2005.03.23. (CzB)  
 Solvent: CDCl3  
 Temp: 25.0 C / 298.1 K  
 INOVA-500 "1500"  
 PULSE SEQUENCE  
 Relax. delay 3.000 sec  
 Pulse 90.0 degrees  
 Aca. time 5.000 sec  
 Width 8000.0 Hz  
 16 repetitions  
 OBSERVE H1, 499.524681 MHz  
 DATA PROCESSING  
 FT size 131072  
 Total time 2 minutes

| INDEX | FREQUENCY | PPM   | HEIGHT | INDEX | FREQUENCY | PPM    | HEIGHT |
|-------|-----------|-------|--------|-------|-----------|--------|--------|
| 1     | 3916.504  | 7.840 | 22.7   | 40    | 2137.579  | 4.279  | 26.3   |
| 2     | 3914.673  | 7.837 | 22.4   | 41    | 2136.108  | 4.278  | 34.5   |
| 3     | 3908.813  | 7.825 | 26.4   | 42    | 2133.788  | 4.272  | 18.5   |
| 4     | 3906.982  | 7.821 | 24.8   | 43    | 2132.935  | 4.270  | 16.1   |
| 5     | 3718.384  | 7.444 | 11.1   | 44    | 1936.768  | 3.877  | 371.8  |
| 6     | 3716.553  | 7.440 | 11.7   | 45    | 1825.000  | 3.253  | 371.1  |
| 7     | 3710.815  | 7.429 | 25.7   | 46    | 801.147   | 1.604  | 22.1   |
| 8     | 3709.106  | 7.425 | 23.9   | 47    | -0.122    | -0.000 | 61.7   |
| 9     | 3703.125  | 7.413 | 22.2   |       |           |        |        |
| 10    | 3701.294  | 7.410 | 20.1   |       |           |        |        |
| 11    | 3691.040  | 7.389 | 20.4   |       |           |        |        |
| 12    | 3689.697  | 7.386 | 22.2   |       |           |        |        |
| 13    | 3633.472  | 7.374 | 23.4   |       |           |        |        |
| 14    | 3632.129  | 7.371 | 23.4   |       |           |        |        |
| 15    | 3675.903  | 7.359 | 12.3   |       |           |        |        |
| 16    | 3674.683  | 7.356 | 11.2   |       |           |        |        |
| 17    | 3628.418  | 7.264 | 51.4   |       |           |        |        |
| 18    | 3599.731  | 7.206 | 54.2   |       |           |        |        |
| 19    | 3597.534  | 7.202 | 59.6   |       |           |        |        |
| 20    | 3557.373  | 7.122 | 31.7   |       |           |        |        |
| 21    | 3555.176  | 7.117 | 28.2   |       |           |        |        |
| 22    | 3548.828  | 7.104 | 36.6   |       |           |        |        |
| 23    | 3546.631  | 7.100 | 33.8   |       |           |        |        |
| 24    | 3491.333  | 6.983 | 25.0   |       |           |        |        |
| 25    | 3490.112  | 6.987 | 26.3   |       |           |        |        |
| 26    | 3485.643  | 6.974 | 22.2   |       |           |        |        |
| 27    | 3482.300  | 6.971 | 23.0   |       |           |        |        |
| 28    | 3448.486  | 6.904 | 64.0   |       |           |        |        |
| 29    | 3439.941  | 6.886 | 55.8   |       |           |        |        |
| 30    | 2161.133  | 4.326 | 17.1   |       |           |        |        |
| 31    | 2160.278  | 4.325 | 17.8   |       |           |        |        |
| 32    | 2157.959  | 4.320 | 35.6   |       |           |        |        |
| 33    | 2156.494  | 4.317 | 25.0   |       |           |        |        |
| 34    | 2154.541  | 4.313 | 36.6   |       |           |        |        |
| 35    | 2152.832  | 4.310 | 44.9   |       |           |        |        |
| 36    | 2152.344  | 4.309 | 42.9   |       |           |        |        |
| 37    | 2141.846  | 4.288 | 44.7   |       |           |        |        |
| 38    | 2141.235  | 4.287 | 42.5   |       |           |        |        |
| 39    | 2139.526  | 4.283 | 37.2   |       |           |        |        |

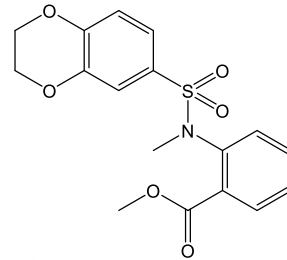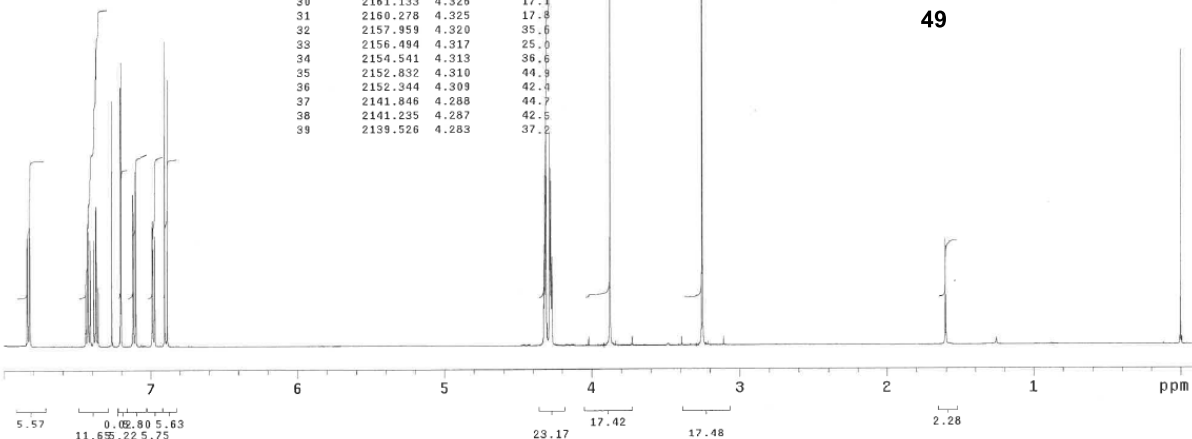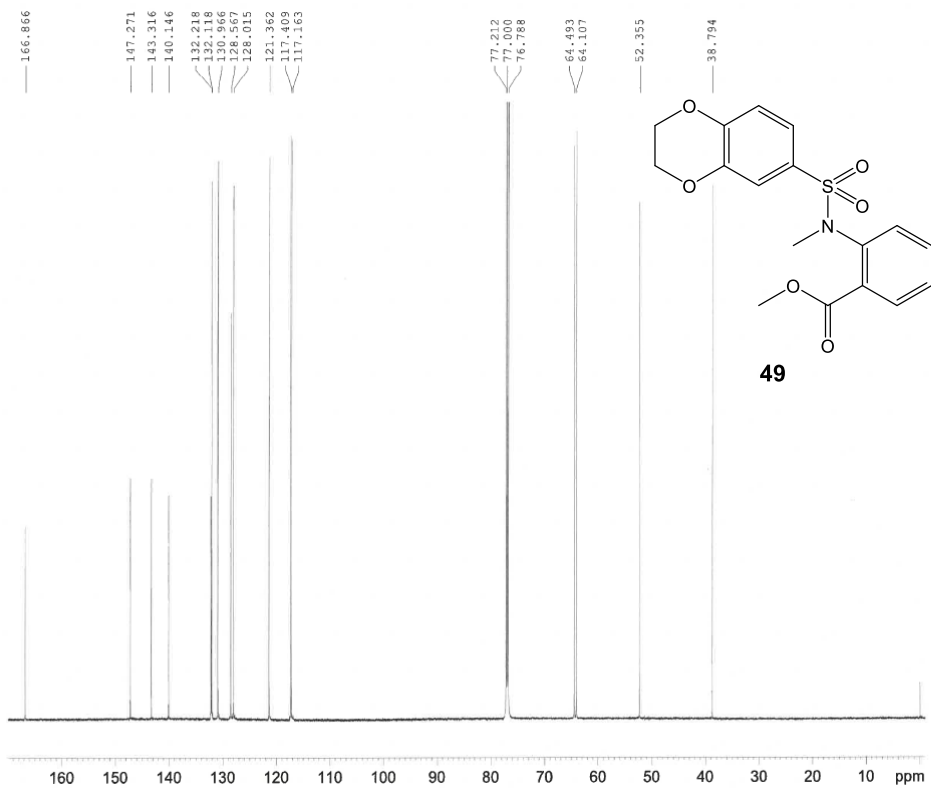

Standard 13C  
 143708  
 bge1830-1830-BGE\_1  
 Berecz Gabor  
 2024.10.11. (KP)

Current Data Parameters  
 NAME 143708  
 EXPNO 12  
 PROCNO 1

F2 - Acquisition Parameters  
 Date 20241012  
 Time 4.08 h  
 INSTRUM spect  
 PROBHD Z145856.0002 (PULPROG zgpg30  
 TD 65536  
 SOLVENT CDCl3  
 NS 2048  
 DS 4  
 SWH 36231.883 Hz  
 FIDRES 1.105709 Hz  
 AQ 0.9043968 sec  
 RE 136.07  
 DW 13.800 usec  
 DE 18.00 usec  
 TE 295.0 K  
 D1 1.0000000 sec  
 D11 0.0300000 sec  
 TD0 1  
 SFO1 150.8852070 MHz  
 NUC1 13C  
 P1 9.90 usec  
 PLW1 71.0000000 W  
 SFO2 600.0024000 MHz  
 NUC2 1H  
 CPDPRG2 waltz16  
 PCPD2 80.00 usec  
 PLW2 32.9000153 W  
 PLW12 0.70370001 W  
 PLW13 0.35339001 W

F2 - Processing parameters  
 SI 131072  
 SF 150.8701291 MHz  
 WDW EM  
 SSB 0  
 LB 1.00 Hz  
 GB 0  
 PC 1.40

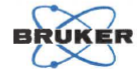

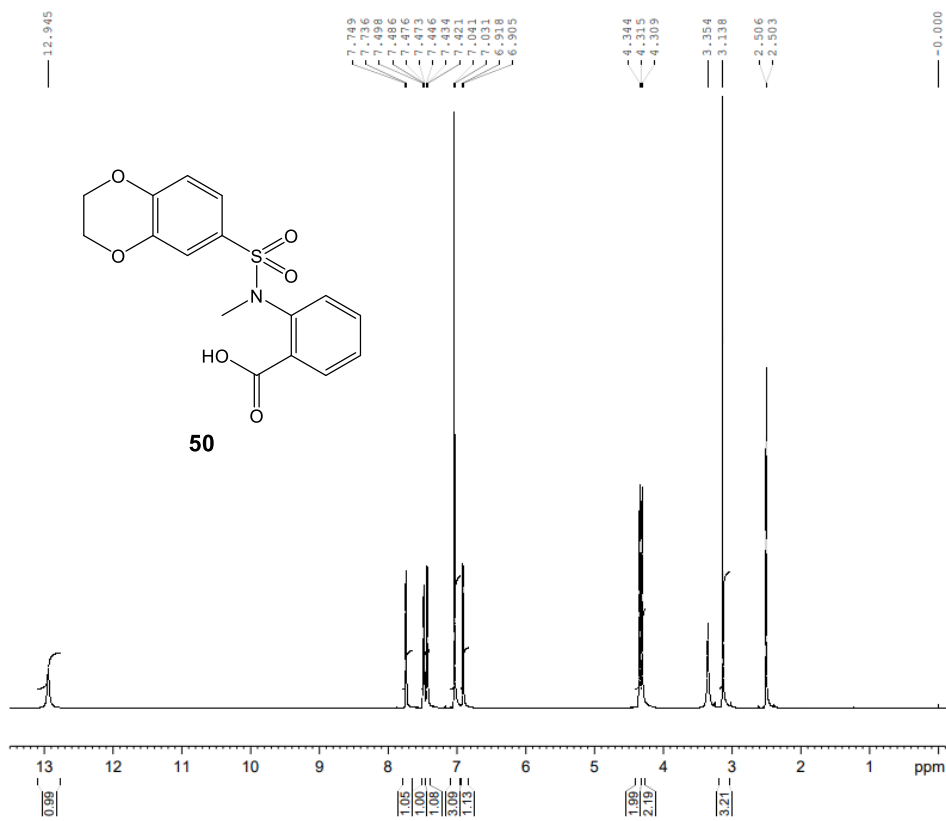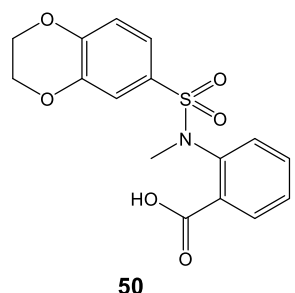

Standard 1H  
144479  
bge1827-1827-BGE\_1  
Berez Gabor  
2025.04.04. (KP)

Current Data Parameters  
NAME 144479  
EXPNO 11  
PROCNO 1

F2 - Acquisition Parameters  
Date\_ 20250404  
Time 19.11 h  
INSTRUM spect  
PROBHD Z145856\_0002 ( )  
PULPROG zg30  
TD 65536  
SOLVENT DMSO  
NS 16  
DS 2  
SWH 12019.230 Hz  
FIDRES 0.366753 Hz  
AQ 2.7262976 sec  
RG 196.07  
DW 41.600 usec  
DE 25.00 usec  
TE 295.0 K  
D1 1.00000000 sec  
TD0 1  
SFO1 600.0037050 MHz  
NUC1 1H  
P1 11.50 usec  
PLW1 28.00000000 W

F2 - Processing parameters  
SI 65536  
SF 600.0000004 MHz  
WDW EM  
SSB 0  
LB 0.30 Hz  
GB 0  
PC 1.00

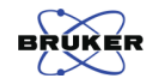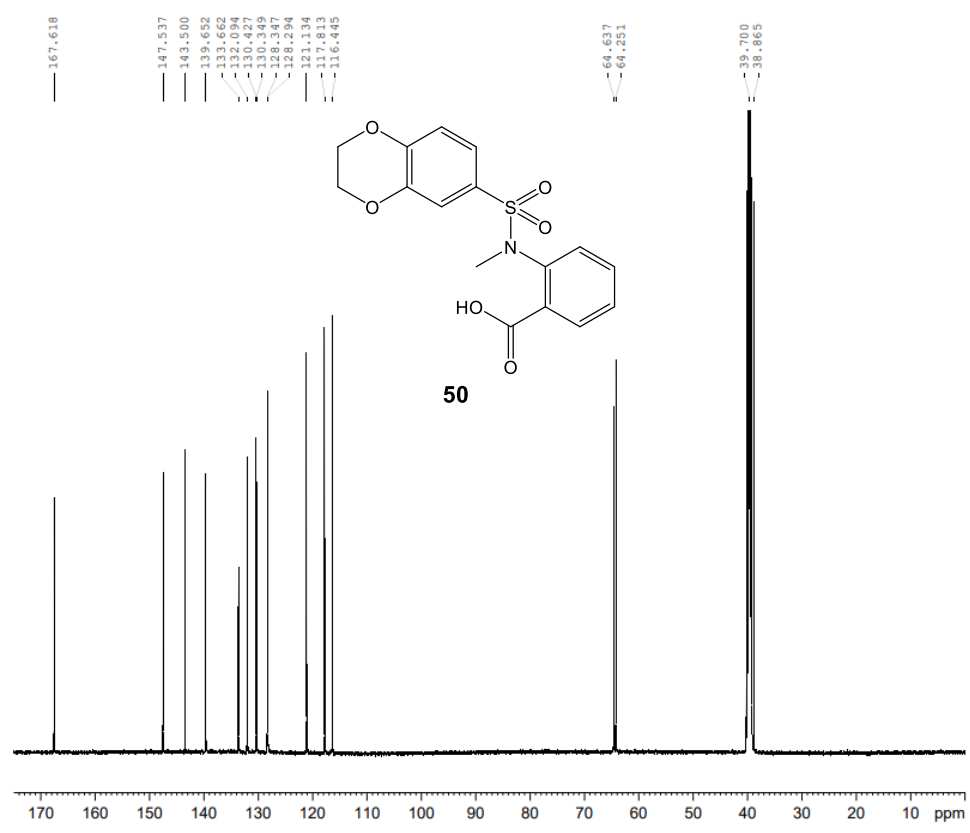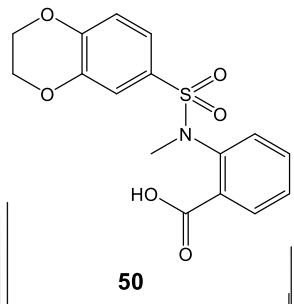

Standard 13C  
144479  
bge1827-1827-BGE\_1  
Berez Gabor  
2025.04.04. (KP)

Current Data Parameters  
NAME 144479  
EXPNO 12  
PROCNO 1

F2 - Acquisition Parameters  
Date\_ 20250404  
Time 20.19 h  
INSTRUM spect  
PROBHD Z145856\_0002 ( )  
PULPROG zgpg30  
TD 65536  
SOLVENT DMSO  
NS 2048  
DS 4  
SWH 36231.883 Hz  
FIDRES 1.105709 Hz  
AQ 0.9043968 sec  
RG 196.07  
DW 13.800 usec  
DE 18.00 usec  
TE 295.0 K  
D1 1.00000000 sec  
D11 0.03000000 sec  
TD0 1  
SFO1 150.8852070 MHz  
NUC1 13C  
P1 9.80 usec  
PLW1 72.69999695 W  
SFO2 600.0024000 MHz  
NUC2 1H  
CPDPRG2 waltz16  
PCPD2 80.00 usec  
PLW2 32.50000000 W  
PLW12 0.70708001 W  
PLW13 0.35508999 W

F2 - Processing parameters  
SI 131072  
SF 150.8701581 MHz  
WDW EM  
SSB 0  
LB 1.00 Hz  
GB 0  
PC 1.40

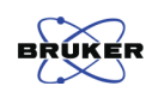





STANDARD PROTON PARAMETERS  
 57266  
 1831-BGE  
 Berecz Gabor  
 2005.03.24. (DA)  
 Solvent: CDC13  
 Temp. 25.0 C / 298.1 K  
 INOVA-500 "i500"  
 PULSE SEQUENCE  
 Pulse 90.0 degrees  
 Acq. time 5.000 sec  
 Width 8000.0 Hz  
 16 repetitions  
 OBSERVE H1, 499.5244689 MHz  
 DATA PROCESSING  
 FT size 131072  
 Total time 1 minute

| INDEX | FREQUENCY | PPM    | HEIGHT |
|-------|-----------|--------|--------|
| 1     | 4145.996  | 8.300  | 21.6   |
| 2     | 4144.531  | 8.297  | 21.7   |
| 3     | 4137.939  | 8.284  | 22.5   |
| 4     | 4136.475  | 8.281  | 21.8   |
| 5     | 3811.035  | 7.629  | 11.9   |
| 6     | 3809.448  | 7.626  | 11.9   |
| 7     | 3802.979  | 7.613  | 22.2   |
| 8     | 3802.246  | 7.612  | 21.9   |
| 9     | 3795.776  | 7.599  | 15.1   |
| 10    | 3794.189  | 7.596  | 14.2   |
| 11    | 3772.949  | 7.553  | 63.6   |
| 12    | 3734.253  | 7.476  | 65.5   |
| 13    | 3685.791  | 7.379  | 15.5   |
| 14    | 3684.814  | 7.377  | 16.5   |
| 15    | 3677.612  | 7.362  | 28.1   |
| 16    | 3667.847  | 7.343  | 32.8   |
| 17    | 3659.790  | 7.327  | 26.9   |
| 18    | 3628.540  | 7.264  | 10.8   |
| 19    | 2181.396  | 4.367  | 35.1   |
| 20    | 2179.321  | 4.363  | 35.5   |
| 21    | 2176.147  | 4.356  | 76.0   |
| 22    | 2171.631  | 4.347  | 76.4   |
| 23    | 2168.457  | 4.341  | 33.7   |
| 24    | 2166.382  | 4.337  | 34.0   |
| 25    | 1649.536  | 3.302  | 268.0  |
| 26    | -0.000    | -0.000 | 14.1   |

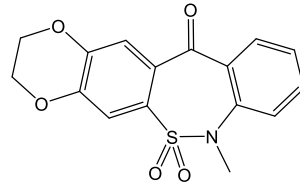

51

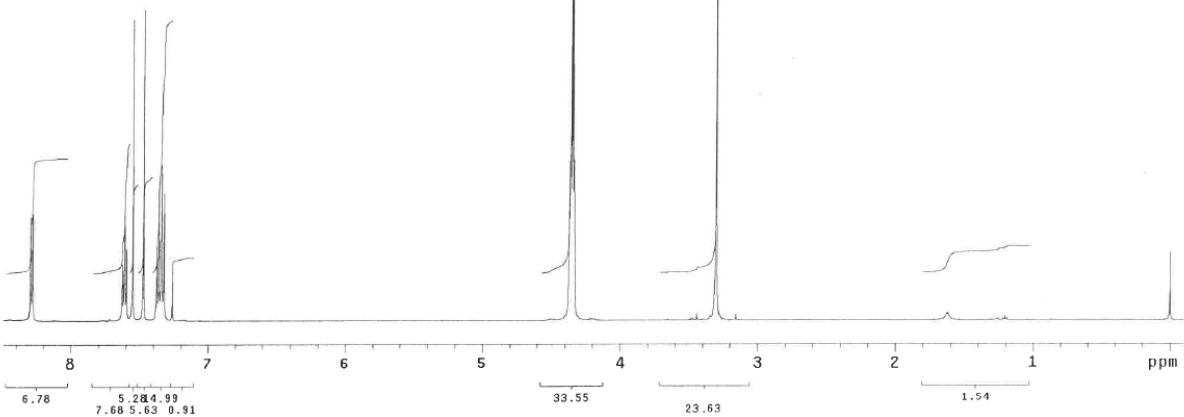

STANDARD 13C PARAMETERS  
 57266  
 1831-BGE  
 Berecz Gabor  
 2005.03.24. (DA)  
 Solvent: CDC13  
 Temp. 25.0 C / 298.1 K  
 User: 1-14-87  
 INOVA-500 "i500"  
 PULSE SEQUENCE  
 Relax. delay 1.200 sec  
 Pulse 45.0 degrees  
 Acq. time 1.300 sec  
 Width 32000.0 Hz  
 720 repetitions  
 OBSERVE C13, 125.6055323 MHz  
 DECOUPLE H1, 499.5269647 MHz  
 Power 32 dB  
 continuously on  
 WALTZ-16 modulated  
 DATA PROCESSING  
 Line broadening 0.5 Hz  
 FT size 131072  
 Total time 30 minutes

| INDEX | FREQUENCY | PPM     | HEIGHT |
|-------|-----------|---------|--------|
| 1     | 23716.804 | 188.805 | 31.9   |
| 2     | 18476.570 | 147.089 | 46.0   |
| 3     | 18389.168 | 146.393 | 42.2   |
| 4     | 17751.472 | 141.316 | 49.4   |
| 5     | 16893.562 | 134.487 | 133.3  |
| 6     | 16597.664 | 132.131 | 152.1  |
| 7     | 16542.976 | 131.696 | 36.4   |
| 8     | 16382.332 | 130.417 | 34.0   |
| 9     | 16280.281 | 129.604 | 39.2   |
| 10    | 15849.617 | 126.176 | 147.8  |
| 11    | 15741.707 | 125.317 | 152.2  |
| 12    | 15239.265 | 121.317 | 155.2  |
| 13    | 14506.355 | 115.482 | 145.5  |
| 14    | 9704.109  | 77.253  | 110.3  |
| 15    | 9672.371  | 77.000  | 112.9  |
| 16    | 9640.144  | 76.743  | 116.1  |
| 17    | 8118.172  | 64.627  | 163.5  |
| 18    | 8084.480  | 64.359  | 159.7  |
| 19    | 4922.371  | 39.186  | 96.4   |

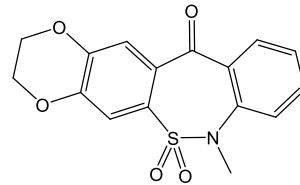

51

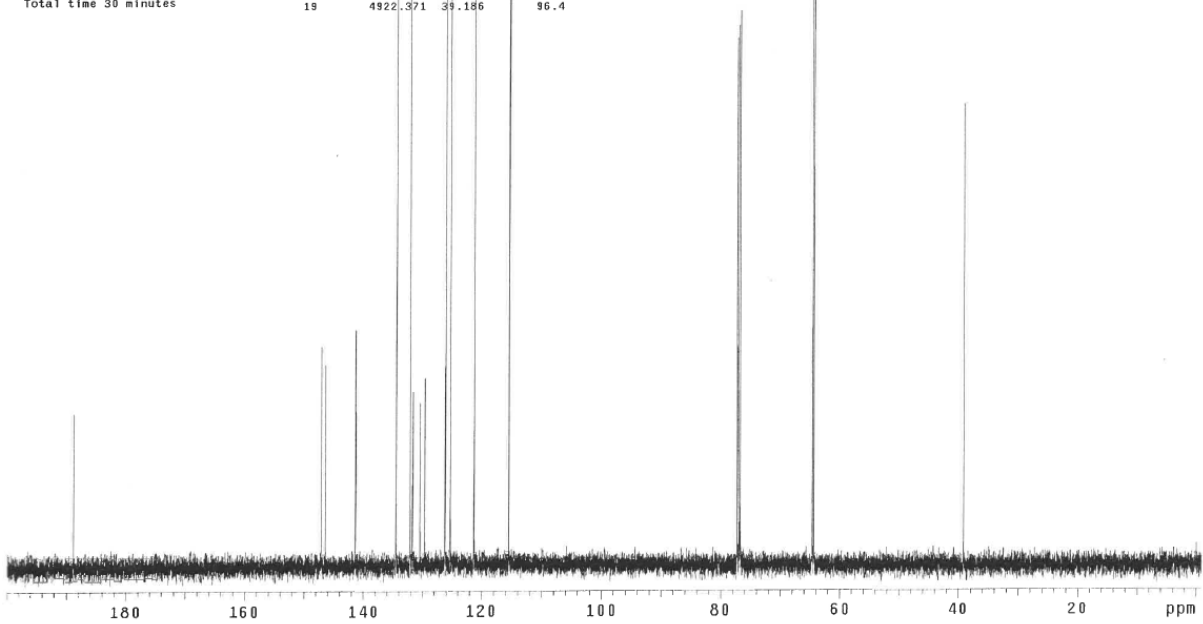

GM0FCOPS\_DA  
 57266  
 1831-BGE  
 Berecz Gabor  
 2005.03.24. (DA)  
 Solvent: CDCl3  
 Temp. 25.0 C / 298.1 K  
 INOVA-500 "i500"  
 SEQUENCE: gmfrcops\_da  
 Relax. delay 1.500 sec  
 Acq. time 0.128 sec  
 Width 8000.0 Hz  
 2D Width 8000.0 Hz  
 Single scan  
 2 x 256 increments  
 OBSERVE H1, 499.5244665 MHz  
 DATA PROCESSING  
 Sq. sine bell 0.128 sec  
 Shifted by -0.128 sec  
 F1 DATA PROCESSING  
 Sine bell 0.042 sec  
 Shifted by -0.042 sec  
 FT size 4096 x 512  
 Total time 14 minutes

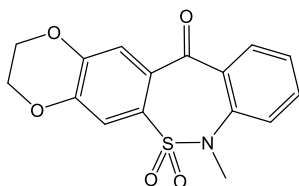

51

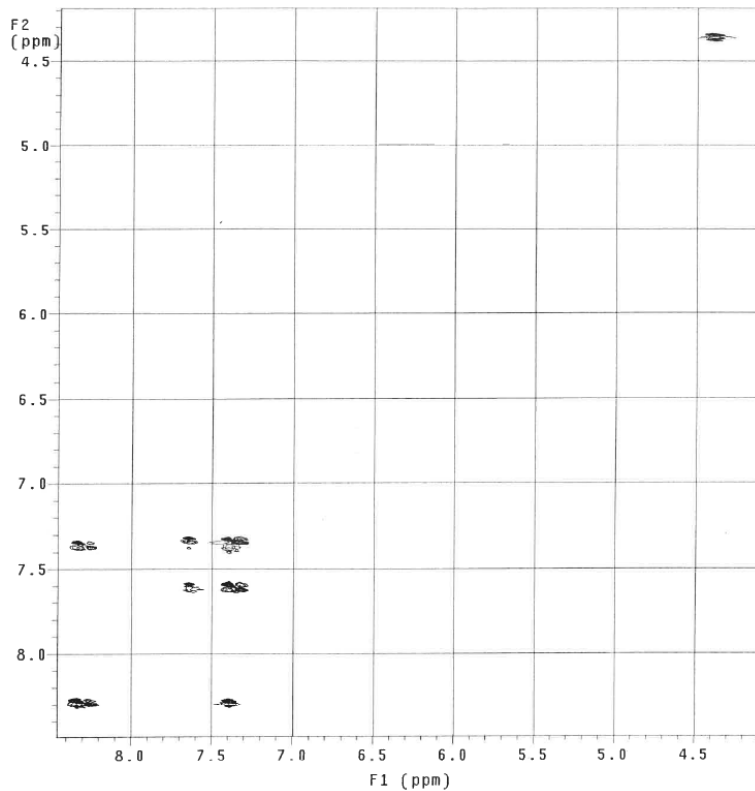

GHSQC\_DA (140 Hz)  
 57266  
 1831-BGE  
 Berecz Gabor  
 2005.03.24. (DA)  
 Solvent: CDCl3  
 Temp. 25.0 C / 298.1 K  
 INOVA-500 "i500"  
 PULSE SEQUENCE: ghsqc\_da  
 Relax. delay 1.500 sec  
 Acq. time 0.128 sec  
 Width 8000.0 Hz  
 2D Width 26507.6 Hz  
 2 repetitions  
 2 x 256 increments  
 OBSERVE H1, 499.5244697 MHz  
 DECOUPLE C13, 125.6176221 MHz  
 Power 42 dB  
 on during acquisition  
 off during delay  
 GARP-1 modulated  
 DATA PROCESSING  
 Sq. sine bell 0.200 sec  
 Shifted by -0.200 sec  
 F1 DATA PROCESSING  
 Sq. sine bell 0.005 sec  
 Shifted by -0.005 sec  
 FT size 4096 x 512  
 Total time 28 minutes

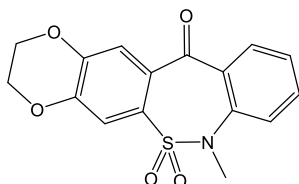

51

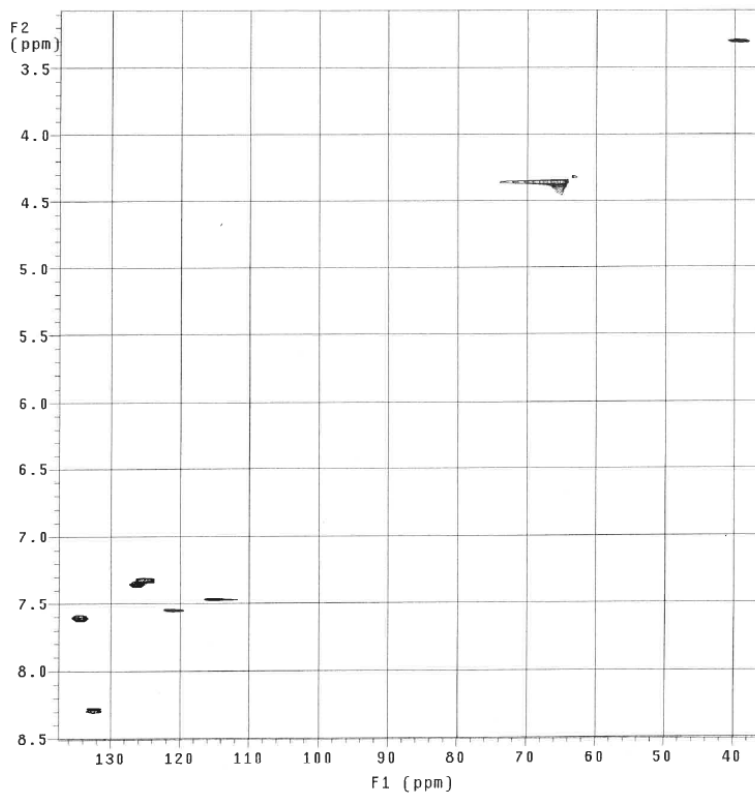



GHMOC\_DA (140 Hz, 8 Hz)  
 57266  
 1831-BGE  
 Berecz Gabor  
 2005.03.24. (DA)  
 Solvent: CDCl3  
 Temp. 25.0 C / 298.1 K  
 INOVA-500 "1500"  
 PULSE SEQUENCE: ghmqc\_da  
 Relax. delay 1.500 sec  
 Acq. time 0.128 sec  
 Width 8000.0 Hz  
 2D Width 26507.6 Hz  
 4 repetitions  
 256 increments  
 OBSERVE H1, 499.5244689 MHz  
 DATA PROCESSING  
 Sine bell 0.128 sec  
 F1 DATA PROCESSING  
 Sine bell 0.002 sec  
 FT size 4096 x 512  
 Total time 28 minutes

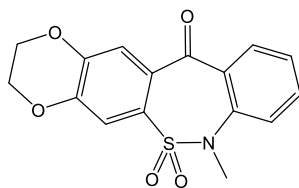

51

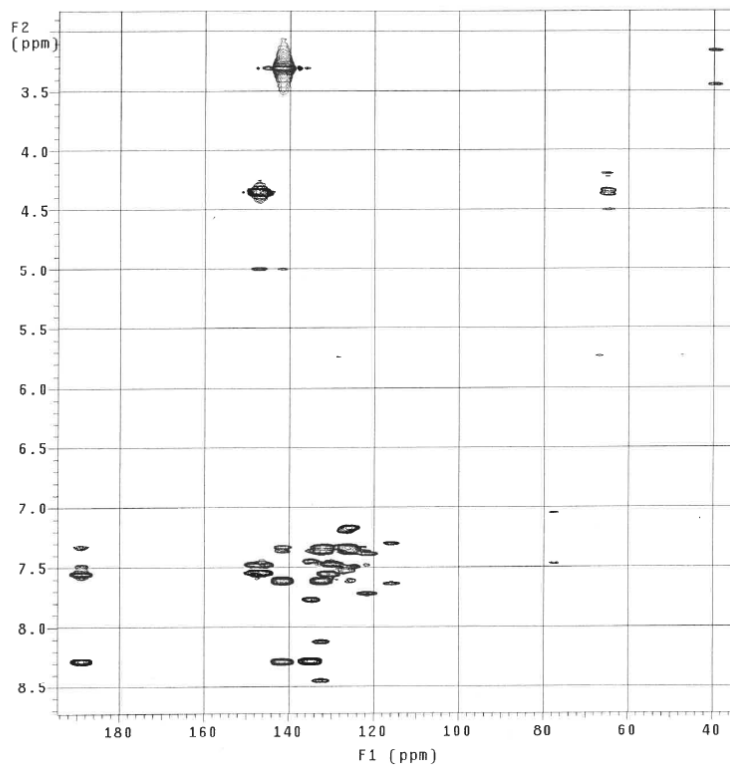

DPFQNOE\_DA (3.30 ppm)  
 57266  
 1831-BGE  
 Berecz Gabor  
 2005.03.24. (DA)  
 Solvent: CDCl3  
 Temp. 25.0 C / 298.1 K  
 INOVA-500 "1500"  
 PULSE SEQUENCE: dpfqnoc\_da  
 Relax. delay 2.000 sec  
 Pulse 102.3 degrees  
 Mixing 2.000 sec  
 Acq. time 5.000 sec  
 Width 8000.0 Hz  
 204 repetitions  
 OBSERVE H1, 499.5244689 MHz  
 DATA PROCESSING  
 Line broadening 1.0 Hz  
 FT size 131072  
 Total time 30 minutes

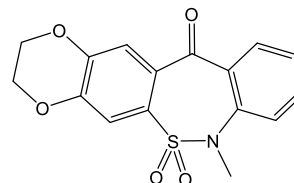

51

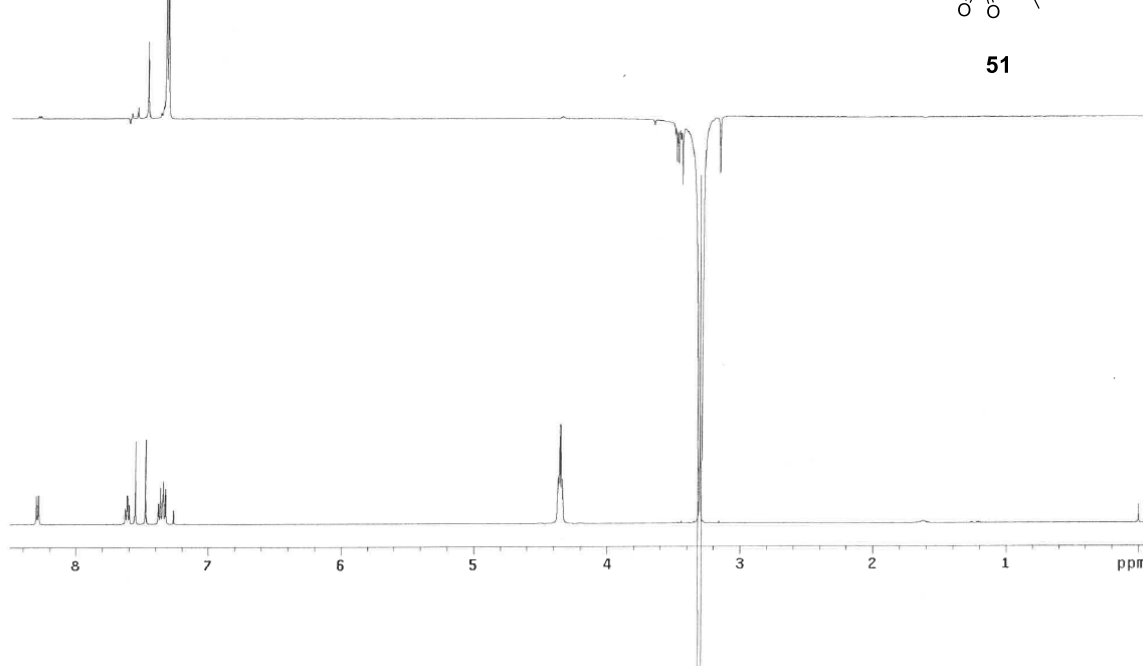

STANDARD 1H  
 58946  
 1868-BQE  
 Berez Gabor  
 2005/07/12 (SZA)  
 Solvent: DMSO  
 Temp. 25.0 C / 298.1 K  
 Sample #1  
 INOVA-500 "1500"  
 PULSE SEQUENCE  
 Relax. delay 3.000 sec  
 Pulse 6.4 usec  
 Acq. time 5.000 sec  
 Width 8000.0 Hz  
 16 repetitions  
 OBSERVE H1, 499.5268368 MHz  
 DATA PROCESSING  
 FT size 131072  
 Total time 2 minutes

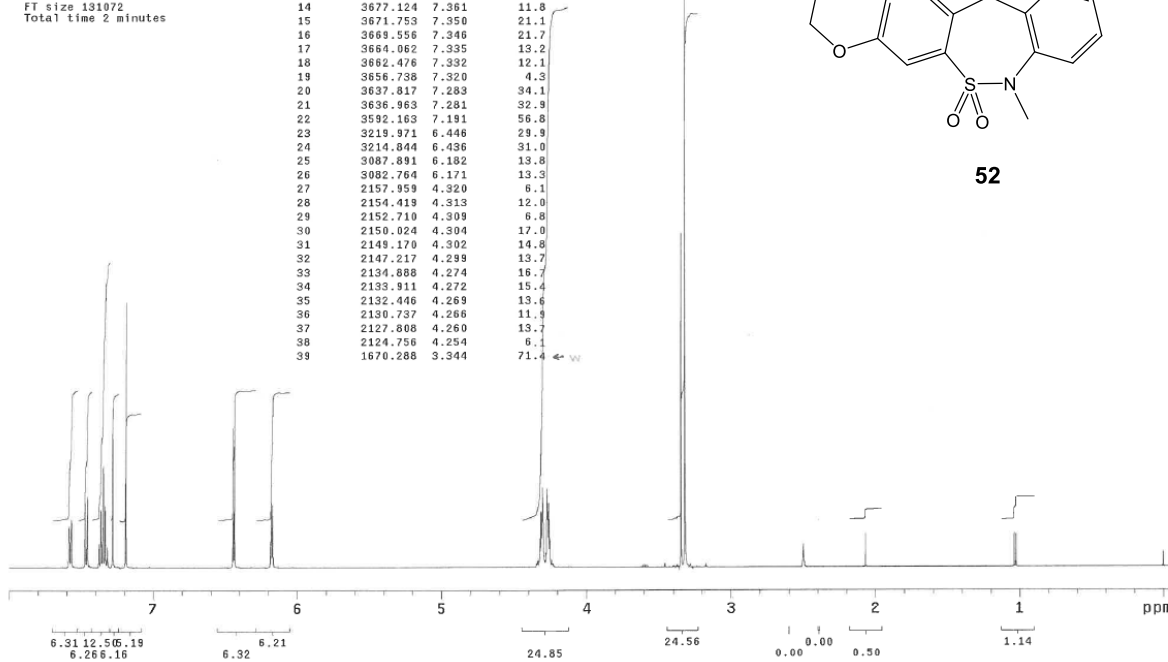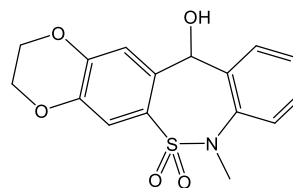

52

STANDARD 13C  
 58946  
 1868-BQE  
 Berez Gabor  
 2005/07/12 (SZA)  
 Solvent: DMSO  
 Temp. 25.0 C / 298.1 K  
 Sample #1, user 1-14-07  
 INOVA-500 "1500"  
 PULSE SEQUENCE  
 Relax. delay 3.000 sec  
 Pulse 6.0 usec  
 Acq. time 1.300 sec  
 Width 32000.0 Hz  
 192 repetitions  
 OBSERVE C13, 125.6061582 MHz  
 DECOUPLE H1, 499.5293374 MHz  
 Power 32 dB  
 continuously on  
 WALTZ-16 modulated  
 DATA PROCESSING  
 Line broadening 1.0 Hz  
 FT size 131072  
 Total time 13 minutes

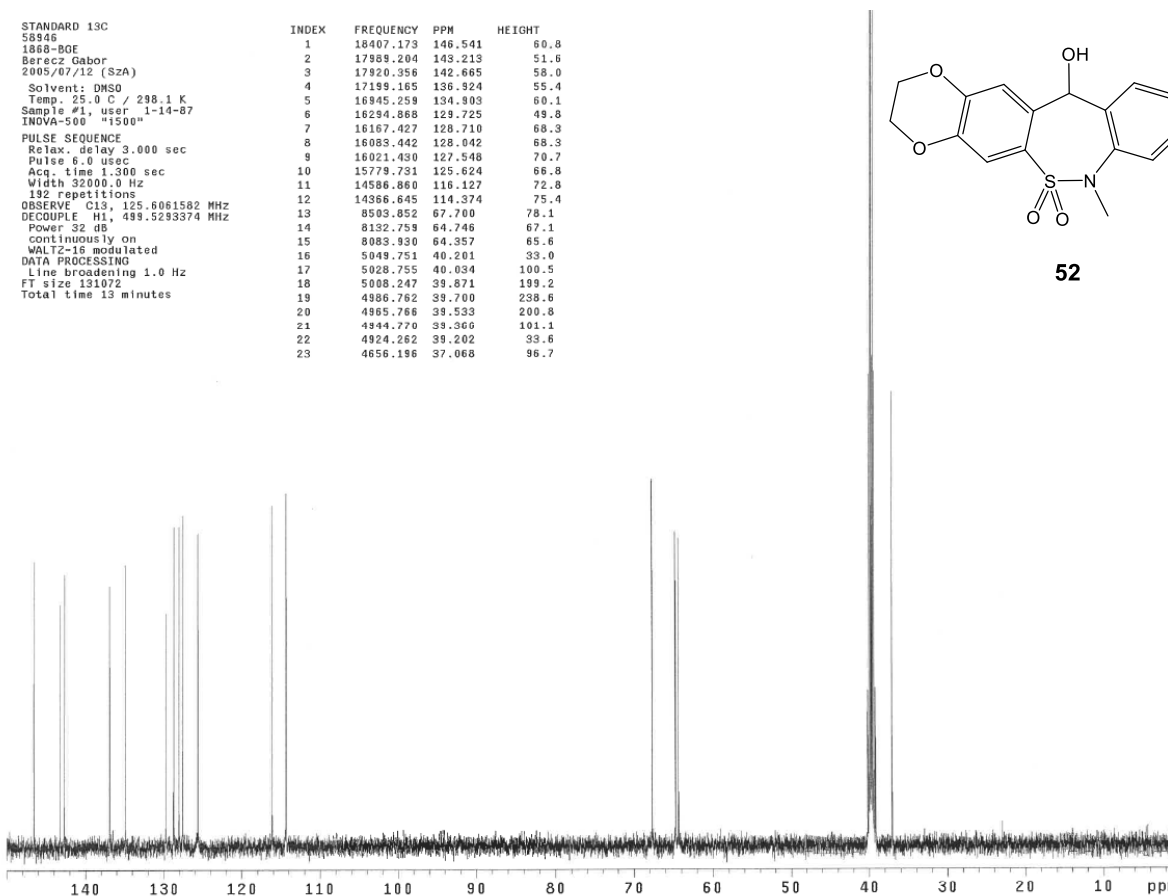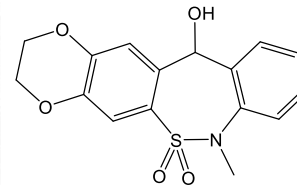

52

STANDARD 1H  
59214  
1879-BOE  
Berez Gabor  
2005.08.04. (CzB)  
Solvent: CDCl3  
Temp. 25.0 C / 298.1 K  
INOVA-500 "i500"  
PULSE SEQUENCE  
Relax. delay 3.000 sec  
Pulse 6.4 usec  
Acq. time 5.000 sec  
Width 8000.0 Hz  
16 repetitions  
OBSERVE H1, 499.5244724 MHz  
DATA PROCESSING  
FT size 131072  
Total time 2 minutes

| INDEX | FREQUENCY PPM | HEIGHT | INDEX | FREQUENCY PPM | HEIGHT |
|-------|---------------|--------|-------|---------------|--------|
| 1     | 3752.930      | 7.513  | 6.0   | 2134.155      | 4.272  |
| 2     | 3749.390      | 7.506  | 41.7  | 2130.859      | 4.266  |
| 3     | 3744.385      | 7.496  | 15.4  | 2129.761      | 4.264  |
| 4     | 3742.798      | 7.493  | 14.8  | 2126.587      | 4.257  |
| 5     | 3739.380      | 7.486  | 9.8   | 1769.165      | 3.542  |
| 6     | 3737.915      | 7.483  | 10.3  | 1555.176      | 3.113  |
| 7     | 3732.422      | 7.472  | 10.4  | 3.174         | 0.006  |
| 8     | 3730.957      | 7.469  | 11.5  | -0.000        | -0.000 |
| 9     | 3724.487      | 7.456  | 4.4   | -3.418        | -0.007 |
| 10    | 3723.022      | 7.453  | 5.1   |               |        |
| 11    | 3699.219      | 7.405  | 8.0   |               |        |
| 12    | 3697.876      | 7.403  | 8.2   |               |        |
| 13    | 3691.650      | 7.390  | 13.0  |               |        |
| 14    | 3690.186      | 7.387  | 11.3  |               |        |
| 15    | 3684.062      | 7.335  | 8.7   |               |        |
| 16    | 3682.476      | 7.332  | 8.6   |               |        |
| 17    | 3656.582      | 7.321  | 8.8   |               |        |
| 18    | 3656.494      | 7.320  | 9.3   |               |        |
| 19    | 3655.396      | 7.318  | 9.5   |               |        |
| 20    | 3654.907      | 7.317  | 9.1   |               |        |
| 21    | 3649.292      | 7.306  | 5.3   |               |        |
| 22    | 3647.705      | 7.302  | 5.5   |               |        |
| 23    | 3625.610      | 7.258  | 17.2  |               |        |
| 24    | 3567.261      | 7.141  | 3.1   |               |        |
| 25    | 3512.939      | 7.033  | 39.4  |               |        |
| 26    | 3024.902      | 6.056  | 33.0  |               |        |
| 27    | 2885.479      | 5.736  | 2.0   |               |        |
| 28    | 2160.645      | 4.325  | 2.6   |               |        |
| 29    | 2158.813      | 4.322  | 2.2   |               |        |
| 30    | 2157.227      | 4.319  | 3.4   |               |        |
| 31    | 2154.419      | 4.313  | 4.8   |               |        |
| 32    | 2152.832      | 4.310  | 4.1   |               |        |
| 33    | 2149.170      | 4.302  | 11.8  |               |        |
| 34    | 2146.973      | 4.298  | 6.2   |               |        |
| 35    | 2144.531      | 4.293  | 18.0  |               |        |
| 36    | 2142.578      | 4.289  | 25.0  |               |        |
| 37    | 2141.357      | 4.287  | 18.8  |               |        |
| 38    | 2138.428      | 4.281  | 39.1  |               |        |
| 39    | 2135.864      | 4.276  | 11.4  |               |        |

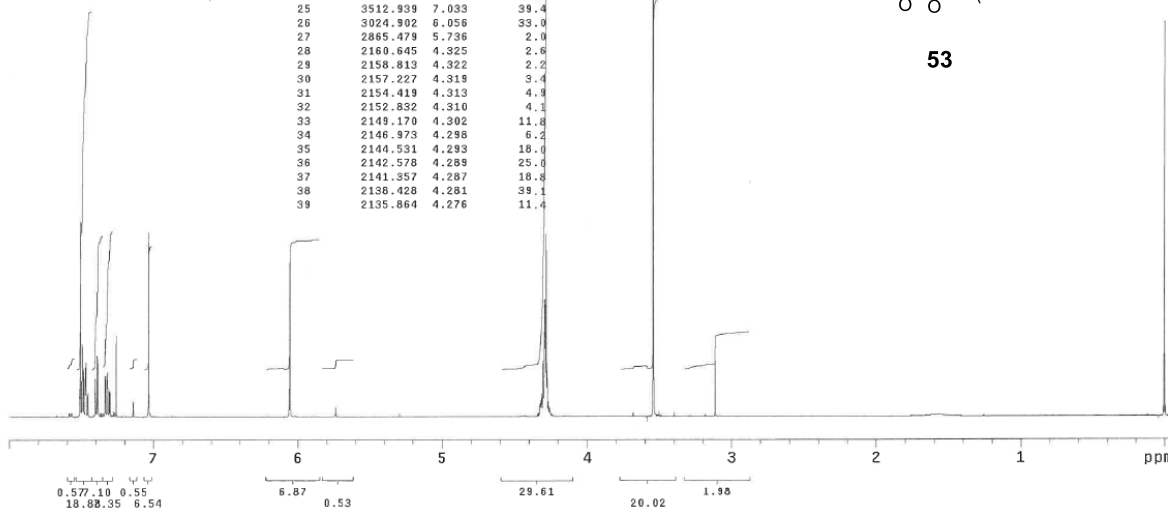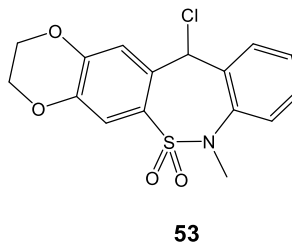

STANDARD 13C  
59214  
1879-BOE  
Berez Gabor  
2005.08.04. (CzB)  
Solvent: CDCl3  
Temp. 25.0 C / 298.1 K  
User: 1-14-07  
INOVA-500 "i500"  
PULSE SEQUENCE  
Relax. delay 3.000 sec  
Pulse 6.0 usec  
Acq. time 1.300 sec  
Width 32000.0 Hz  
864 repetitions  
OBSERVE C13, 125.6055298 MHz  
DECOUPLE H1, 499.5269647 MHz  
Power 32 dB  
WALTZ-16 modulated  
Line broadening 1.0 Hz  
FT size 131072  
Total time 61 minutes

| INDEX | FREQUENCY PPM | HEIGHT             |
|-------|---------------|--------------------|
| 1     | 18367.195     | 146.218            |
| 2     | 18151.374     | 144.500            |
| 3     | 17507.820     | 139.377            |
| 4     | 17320.808     | 137.888            |
| 5     | 16710.945     | 135.033            |
| 6     | 16621.589     | (132.321 imp) 8.3  |
| 7     | 16475.105     | 131.155            |
| 8     | 16297.859     | 129.744            |
| 9     | 16230.964     | 129.212            |
| 10    | 16150.886     | 128.574            |
| 11    | 16140.144     | 128.489            |
| 12    | 15987.312     | (127.272 imp) 19.2 |
| 13    | 15939.949     | (126.895 imp) 14.8 |
| 14    | 15045.906     | 119.778            |
| 15    | 14848.152     | (118.203 imp) 11.4 |
| 16    | 14728.523     | 117.251            |
| 17    | 9704.109      | 77.253             |
| 18    | 9672.371      | 77.000             |
| 19    | 9640.632      | 76.747             |
| 20    | 8109.382      | 64.557             |
| 21    | 8094.480      | 64.359             |
| 22    | 8075.203      | (64.285 imp) 15.5  |
| 23    | 8057.624      | 64.145             |
| 24    | 4975.105      | (39.606 imp) 7.7   |
| 25    | 4886.238      | 38.898             |
| 26    | -2.922        | -0.023             |

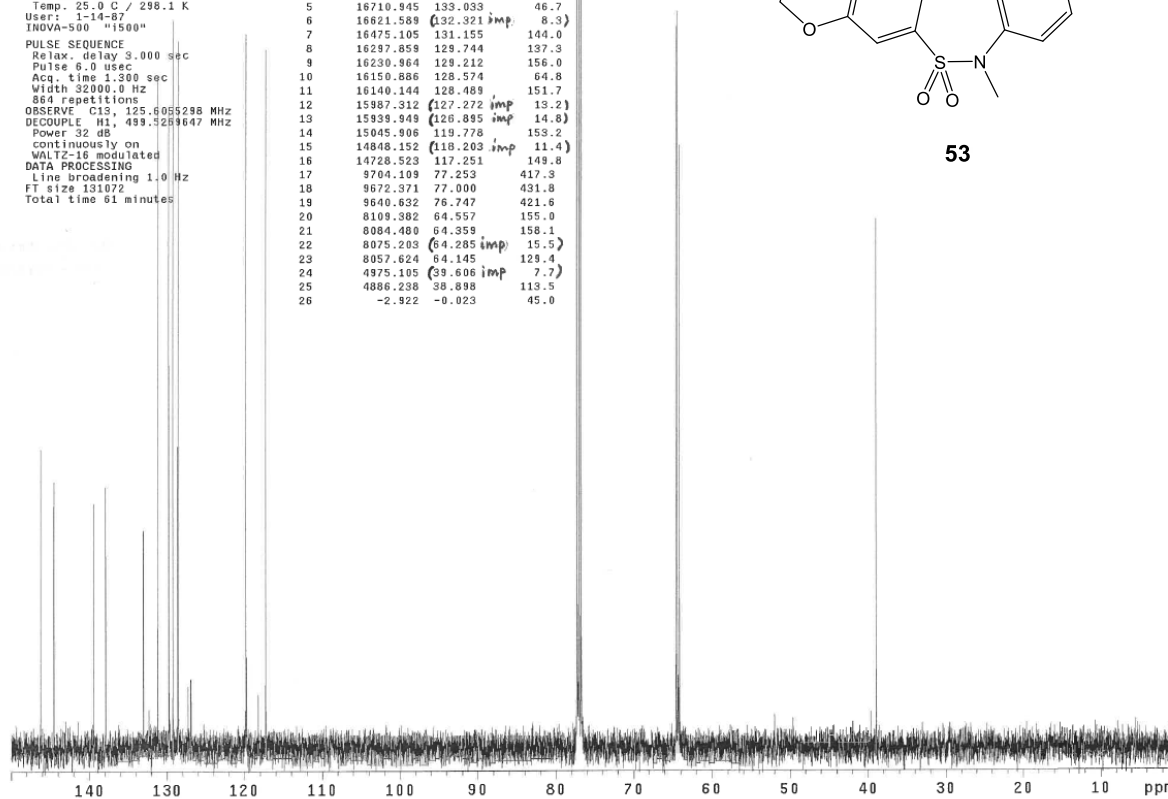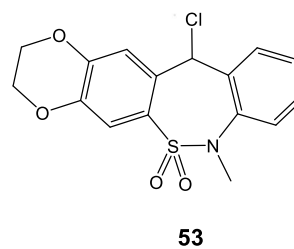

STANDARD 1H  
59373  
1883-BGE  
Berez Gabor  
2005.08.24. (CzB)  
Solvent: CDC13  
Temp. 25.0 C / 298.1 K  
INVA-500 "i500"  
PULSE SEQUENCE  
Pulse 6.4 usec  
Acq. time 5.000 sec  
Width 8000.0 Hz  
16 repetitions  
OBSERVE H1, 499.5244696 MHz  
DATA PROCESSING  
FT size 131072  
Total time 1 minute

| INDEX | FREQUENCY | PPM    | HEIGHT |
|-------|-----------|--------|--------|
| 1     | 3752.930  | 7.513  | 38.1   |
| 2     | 3694.214  | 7.395  | 11.7   |
| 3     | 3687.012  | 7.381  | 13.0   |
| 4     | 3686.523  | 7.380  | 12.9   |
| 5     | 3661.377  | 7.330  | 27.9   |
| 6     | 3660.522  | 7.328  | 25.9   |
| 7     | 3658.568  | 7.324  | 20.1   |
| 8     | 3655.518  | 7.318  | 15.6   |
| 9     | 3654.175  | 7.315  | 12.2   |
| 10    | 3639.911  | 7.275  | 9.3    |
| 11    | 3631.104  | 7.269  | 7.2    |
| 12    | 3628.052  | 7.263  | 15.4   |
| 13    | 3626.343  | 7.260  | 8.8    |
| 14    | 3625.244  | 7.257  | 6.7    |
| 15    | 3623.779  | 7.254  | 6.1    |
| 16    | 3620.239  | 7.247  | 5.0    |
| 17    | 3617.676  | 7.242  | 4.4    |
| 18    | 3475.830  | 6.958  | 41.3   |
| 19    | 2388.428  | 4.781  | 26.5   |
| 20    | 2150.391  | 4.305  | 6.6    |
| 21    | 2146.973  | 4.298  | 17.0   |
| 22    | 2144.531  | 4.293  | 14.8   |
| 23    | 2143.066  | 4.290  | 19.1   |
| 24    | 2141.113  | 4.286  | 31.7   |
| 25    | 2134.399  | 4.273  | 17.9   |
| 26    | 2133.057  | 4.270  | 24.7   |
| 27    | 2132.090  | 4.268  | 25.7   |
| 28    | 2129.893  | 4.264  | 14.9   |
| 29    | 2128.418  | 4.261  | 15.3   |
| 30    | 2126.221  | 4.256  | 9.2    |
| 31    | 2125.122  | 4.254  | 7.1    |
| 32    | 1634.155  | 3.271  | 151.2  |
| 33    | 1173.584  | 2.349  | 131.4  |
| 34    | -0.000    | -0.000 | 12.9   |

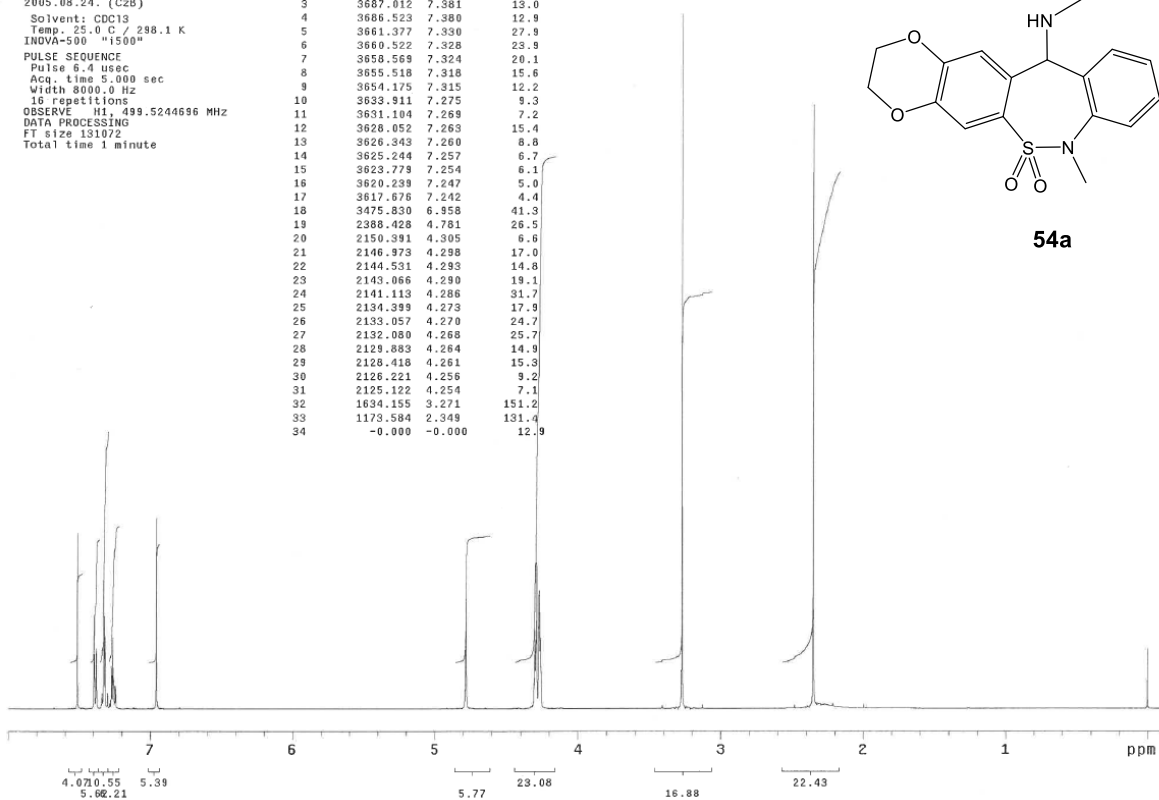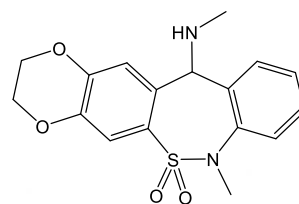

54a

STANDARD 13C  
59373  
1883-BGE  
Berez Gabor  
2005.08.24. (CzB)  
Solvent: CDC13  
Temp. 25.0 C / 298.1 K  
User: 1-14-B  
INVA-500 "i500"  
PULSE SEQUENCE  
Relax. delay 3.000 sec  
Pulse 12.0 usec  
Acq. time 1.300 sec  
Width 32000.0 Hz  
736 repetitions  
OBSERVE C13, 125.6055318 MHz  
DECOUPLE H1, 499.5269647 MHz  
Power 32 dB  
continuously on  
WALTZ-16 modulated  
DATA PROCESSING  
Line broadening 0.5 Hz  
FT size 131072  
Total time 52 minutes

| INDEX | FREQUENCY | PPM     | HEIGHT |
|-------|-----------|---------|--------|
| 1     | 18377.445 | 146.300 | 33.0   |
| 2     | 17818.953 | 142.850 | 30.7   |
| 3     | 17484.871 | 139.194 | 26.6   |
| 4     | 17344.246 | 138.074 | 12.8   |
| 5     | 16558.113 | 131.816 | 17.2   |
| 6     | 16389.168 | 130.471 | 20.2   |
| 7     | 16361.555 | 130.409 | 27.2   |
| 8     | 16190.437 | 128.889 | 94.6   |
| 9     | 16015.632 | 127.498 | 116.7  |
| 10    | 16013.679 | 127.482 | 112.0  |
| 11    | 14913.093 | 118.720 | 32.5   |
| 12    | 14859.871 | 118.297 | 110.0  |
| 13    | 9704.109  | 77.253  | 64.4   |
| 14    | 9672.371  | 77.000  | 86.1   |
| 15    | 9640.144  | 76.743  | 65.8   |
| 16    | 8537.605  | 67.966  | 17.7   |
| 17    | 8115.730  | 64.608  | 109.9  |
| 18    | 8063.972  | 64.196  | 107.1  |
| 19    | 4842.781  | 38.553  | 43.5   |
| 20    | 4371.101  | 34.798  | 104.6  |

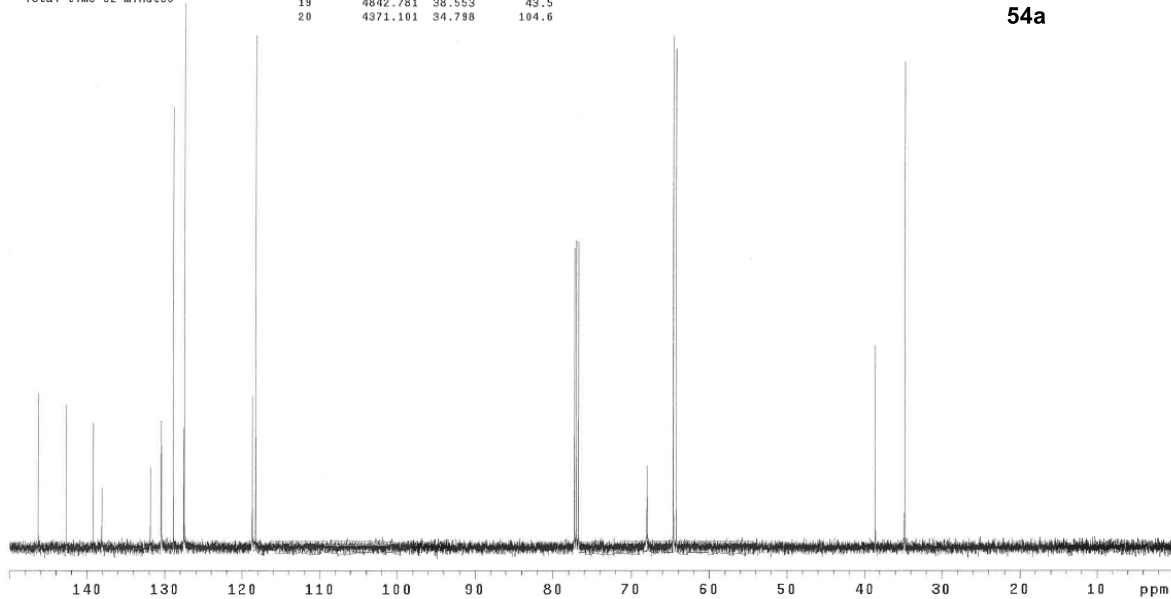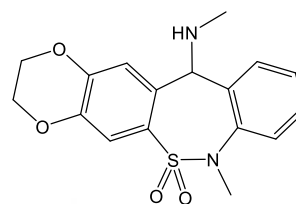

54a

STANDARD 1H  
 59234  
 1880-BGE  
 Berecz Gabor  
 2005.08.09. (CzB)  
 Solvent: CDC13  
 Temp: 25.0 C / 298.1 K  
 File: 592341h  
 INOVA-500 "i500"  
 PULSE SEQUENCE  
 Pulse 6.4 usec  
 Acq. time 5.000 sec  
 Width 8000.0 Hz  
 16 repetitions  
 OBSERVE H1, 499.5244702 MHz  
 DATA PROCESSING  
 FT size 131072  
 Total time 1 minute

| INDEX | FREQUENCY | PPM   | HEIGHT | INDEX | FREQUENCY | PPM   | HEIGHT |
|-------|-----------|-------|--------|-------|-----------|-------|--------|
| 1     | 3729.126  | 7.465 | 31.3   | 40    | 1121.216  | 2.245 | 22.4   |
| 2     | 3716.675  | 7.440 | 8.0    | 41    | 850.586   | 1.703 | 11.8   |
| 3     | 3715.454  | 7.438 | 7.6    | 42    | 848.511   | 1.699 | 14.6   |
| 4     | 3708.862  | 7.425 | 11.7   | 43    | 845.947   | 1.694 | 18.2   |
| 5     | 3707.764  | 7.423 | 10.6   | 44    | 843.994   | 1.690 | 32.8   |
| 6     | 3676.758  | 7.361 | 5.9    | 45    | 841.919   | 1.685 | 16.8   |
| 7     | 3674.927  | 7.357 | 6.2    | 46    | 839.722   | 1.681 | 13.5   |
| 8     | 3659.434  | 7.346 | 9.2    | 47    | 837.524   | 1.677 | 10.1   |
| 9     | 3667.725  | 7.342 | 10.1   | 48    | 798.340   | 1.598 | 3.3    |
| 10    | 3661.743  | 7.330 | 5.4    | 49    | 0.000     | 0.000 | 14.8   |
| 11    | 3660.034  | 7.327 | 6.1    |       |           |       |        |
| 12    | 3648.682  | 7.304 | 6.4    |       |           |       |        |
| 13    | 3646.973  | 7.301 | 6.9    |       |           |       |        |
| 14    | 3641.113  | 7.289 | 13.6   |       |           |       |        |
| 15    | 3639.404  | 7.286 | 10.4   |       |           |       |        |
| 16    | 3628.953  | 7.261 | 20.6   |       |           |       |        |
| 17    | 3625.610  | 7.258 | 9.4    |       |           |       |        |
| 18    | 3619.507  | 7.246 | 10.5   |       |           |       |        |
| 19    | 3618.286  | 7.243 | 9.7    |       |           |       |        |
| 20    | 3612.061  | 7.231 | 4.2    |       |           |       |        |
| 21    | 3610.718  | 7.228 | 3.8    |       |           |       |        |
| 22    | 3440.674  | 6.888 | 39.1   |       |           |       |        |
| 23    | 2142.822  | 4.290 | 4.1    |       |           |       |        |
| 24    | 2139.771  | 4.284 | 4.8    |       |           |       |        |
| 25    | 2136.719  | 4.278 | 5.8    |       |           |       |        |
| 26    | 2131.714  | 4.267 | 10.4   |       |           |       |        |
| 27    | 2129.883  | 4.264 | 4.3    |       |           |       |        |
| 28    | 2127.886  | 4.259 | 7.9    |       |           |       |        |
| 29    | 2124.512  | 4.253 | 3.5    |       |           |       |        |
| 30    | 2122.070  | 4.248 | 6.0    |       |           |       |        |
| 31    | 2120.361  | 4.245 | 10.0   |       |           |       |        |
| 32    | 2119.263  | 4.243 | 12.5   |       |           |       |        |
| 33    | 2115.601  | 4.235 | 21.5   |       |           |       |        |
| 34    | 2113.647  | 4.231 | 32.8   |       |           |       |        |
| 35    | 2111.928  | 4.227 | 16.9   |       |           |       |        |
| 36    | 2108.154  | 4.220 | 4.7    |       |           |       |        |
| 37    | 2106.689  | 4.217 | 4.0    |       |           |       |        |
| 38    | 2051.514  | 4.107 | 13.9   |       |           |       |        |
| 39    | 1747.925  | 3.499 | 143.3  |       |           |       |        |

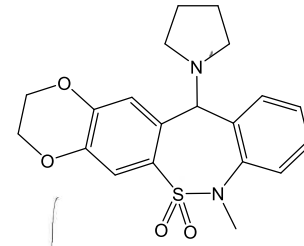

54b

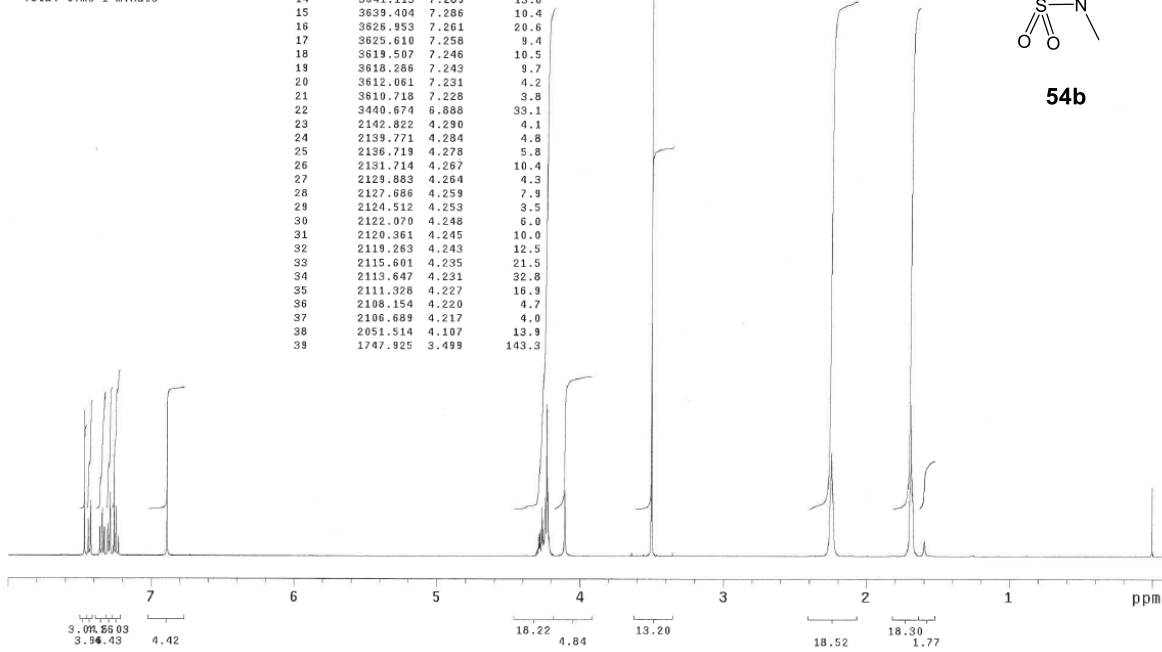

STANDARD 13C  
 59234  
 1880-BGE  
 Berecz Gabor  
 2005.08.09. (CzB)  
 Solvent: CDC13  
 Temp: 25.0 C / 298.1 K  
 User: 1-14-97  
 INOVA-500 "i500"  
 PULSE SEQUENCE  
 Relax. delay 3.000 sec  
 Pulse 6.0 usec  
 Acq. time 1.300 sec  
 Width 32000.0 Hz  
 10240 repetitions  
 OBSERVE C13, 125.6055308 MHz  
 DECOUPLE H1, 499.5268647 MHz  
 Power 32 dB  
 continuously on  
 WALTZ-16 modulated  
 DATA PROCESSING  
 line broadening 1.0 Hz  
 FT size 131072  
 Total time 12.2 hours

| INDEX | FREQUENCY | PPM     | HEIGHT |
|-------|-----------|---------|--------|
| 1     | 18259.285 | 145.359 | 29.7   |
| 2     | 18019.539 | 143.450 | 31.7   |
| 3     | 17859.382 | 142.175 | 33.3   |
| 4     | 17367.683 | 138.261 | 31.1   |
| 5     | 16798.635 | 133.733 | 6.6    |
| 6     | 16525.886 | 131.560 | 10.1   |
| 7     | 16377.937 | 130.382 | 27.8   |
| 8     | 16296.882 | 129.737 | 38.6   |
| 9     | 16268.562 | 129.511 | 58.2   |
| 10    | 16127.937 | 128.292 | 68.4   |
| 11    | 14982.429 | 119.272 | 26.8   |
| 12    | 14760.261 | 117.504 | 70.8   |
| 13    | 9704.109  | 77.253  | 196.6  |
| 14    | 9672.371  | 77.000  | 203.0  |
| 15    | 9640.144  | 76.743  | 196.9  |
| 16    | 9521.980  | 75.803  | 11.1   |
| 17    | 8113.289  | 64.588  | 78.2   |
| 18    | 8065.437  | 64.207  | 77.4   |
| 19    | 6742.195  | 53.673  | 157.3  |
| 20    | 4854.597  | 39.443  | 23.7   |
| 21    | 2921.394  | 23.257  | 166.2  |
| 22    | -3.899    | -0.031  | 4.5    |

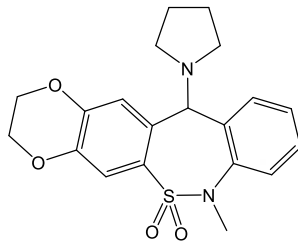

54b

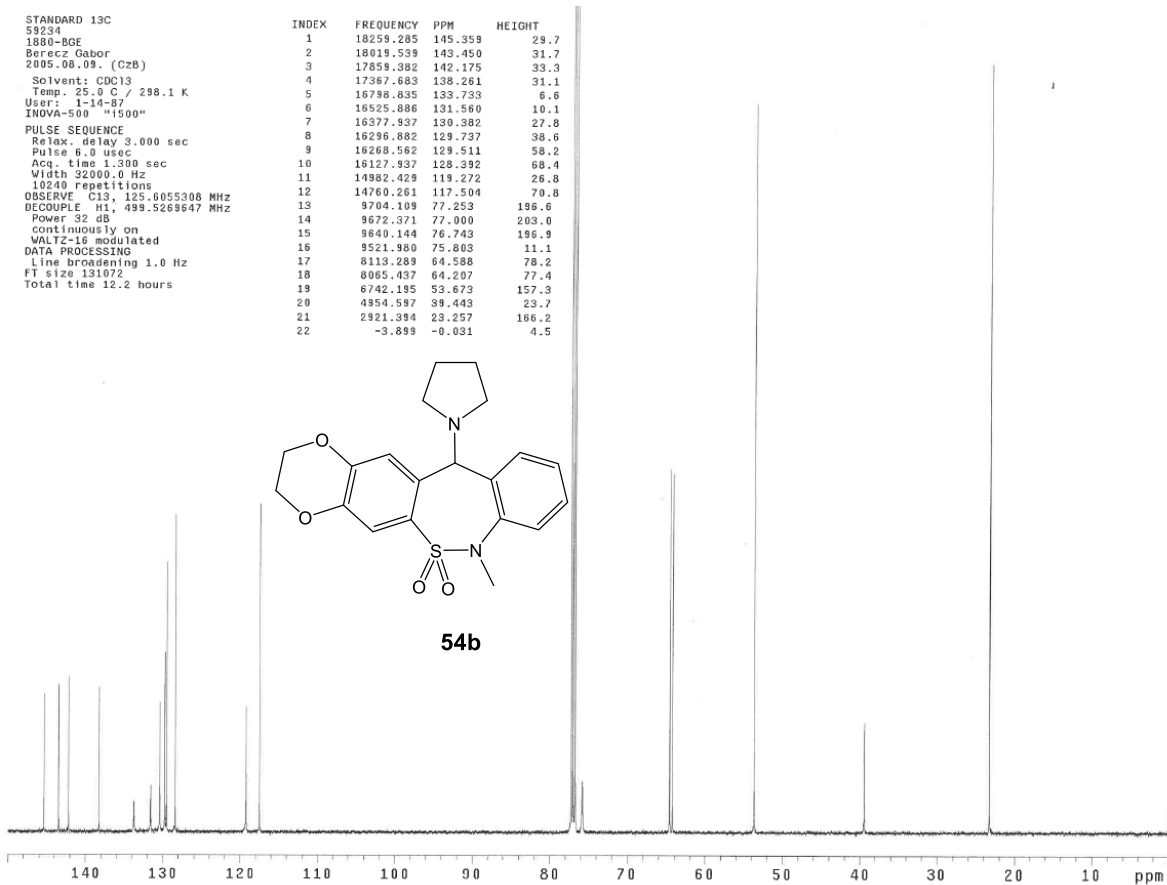

STANDARD 1H  
 82179  
 1939-BGE  
 Berecz Gabor  
 2006.02.24. (CzB)  
 Solvent: CDCl3  
 Temp. 25.0 C / 298.1 K  
 INOVA-500 "1500"  
 PULSE SEQUENCE  
 Relax. delay 3.000 sec  
 Pulse 6.4 usec  
 Acq. time 5.000 sec  
 Width 8000.0 Hz  
 16 repetitions  
 OBSERVE H1, 499.5244668 MHz  
 DATA PROCESSING  
 FT size 131072  
 Total time 2 minutes

| INDEX | FREQUENCY | PPM   | HEIGHT | INDEX | FREQUENCY | PPM    | HEIGHT |
|-------|-----------|-------|--------|-------|-----------|--------|--------|
| 1     | 3742.798  | 7.493 | 58.6   | 40    | 1326.172  | 2.655  | 2.9    |
| 2     | 3686.035  | 7.379 | 11.4   | 41    | 1324.941  | 2.651  | 3.0    |
| 3     | 3684.448  | 7.376 | 13.9   | 42    | 1320.068  | 2.643  | 5.4    |
| 4     | 3682.007  | 7.371 | 11.7   | 43    | 1314.575  | 2.632  | 7.0    |
| 5     | 3679.467  | 7.364 | 14.3   | 44    | 1312.866  | 2.628  | 7.4    |
| 6     | 3676.880  | 7.361 | 17.4   | 45    | 1307.495  | 2.617  | 9.2    |
| 7     | 3675.537  | 7.358 | 22.0   | 46    | 1302.979  | 2.608  | 8.4    |
| 8     | 3674.194  | 7.355 | 20.4   | 47    | 1297.485  | 2.597  | 6.1    |
| 9     | 3662.964  | 7.333 | 9.2    | 48    | 1291.504  | 2.585  | 3.2    |
| 10    | 3661.377  | 7.330 | 9.2    | 49    | 1271.484  | 2.545  | 4.2    |
| 11    | 3655.640  | 7.318 | 15.3   | 50    | 1268.957  | 2.535  | 4.1    |
| 12    | 3654.175  | 7.315 | 13.0   | 51    | 1264.938  | 2.530  | 3.1    |
| 13    | 3647.705  | 7.302 | 7.9    | 52    | 1259.155  | 2.521  | 8.6    |
| 14    | 3646.240  | 7.299 | 6.5    | 53    | 1254.028  | 2.510  | 8.0    |
| 15    | 3630.981  | 7.289 | 11.6   | 54    | 1251.331  | 2.506  | 6.2    |
| 16    | 3628.540  | 7.284 | 11.4   | 55    | 1246.582  | 2.496  | 4.8    |
| 17    | 3627.075  | 7.281 | 11.0   | 56    | 1236.816  | 2.476  | 6.5    |
| 18    | 3621.094  | 7.249 | 15.1   | 57    | 1231.923  | 2.465  | 12.2   |
| 19    | 3619.629  | 7.246 | 14.5   | 58    | 1225.708  | 2.454  | 8.3    |
| 20    | 3613.770  | 7.234 | 6.1    | 59    | 1218.894  | 2.440  | 6.0    |
| 21    | 3612.305  | 7.231 | 5.7    | 60    | 1213.523  | 2.430  | 2.5    |
| 22    | 3479.248  | 6.965 | 48.0   | 61    | 1184.180  | 2.381  | 2.3    |
| 23    | 2459.229  | 4.923 | 15.0   | 62    | 1190.308  | 2.383  | 4.7    |
| 24    | 2144.897  | 4.294 | 7.2    | 63    | 1183.350  | 2.369  | 11.4   |
| 25    | 2141.479  | 4.287 | 17.9   | 64    | 1178.711  | 2.360  | 18.3   |
| 26    | 2138.550  | 4.281 | 17.9   | 65    | 1174.072  | 2.350  | 17.0   |
| 27    | 2137.329  | 4.279 | 20.5   | 66    | 1160.545  | 2.323  | 4.0    |
| 28    | 2135.132  | 4.274 | 25.4   | 67    | 993.896   | 1.990  | 4.3    |
| 29    | 2125.610  | 4.255 | 35.0   | 68    | -0.000    | -0.000 | 12.2   |
| 30    | 2122.192  | 4.248 | 21.1   |       |           |        |        |
| 31    | 2118.530  | 4.241 | 10.1   |       |           |        |        |
| 32    | 1846.318  | 3.696 | 2.4    |       |           |        |        |
| 33    | 1839.111  | 3.682 | 22.6   |       |           |        |        |
| 34    | 1838.135  | 3.680 | 23.0   |       |           |        |        |
| 35    | 1834.717  | 3.673 | 36.2   |       |           |        |        |
| 36    | 1833.496  | 3.670 | 35.4   |       |           |        |        |
| 37    | 1829.956  | 3.663 | 23.7   |       |           |        |        |
| 38    | 1827.612  | 3.358 | 171.9  |       |           |        |        |
| 39    | 1362.061  | 2.727 | 2.5    |       |           |        |        |

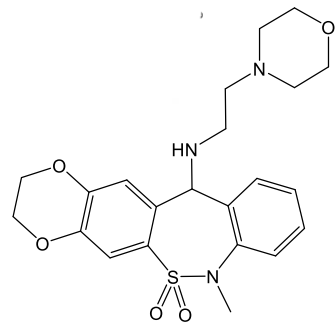

54c

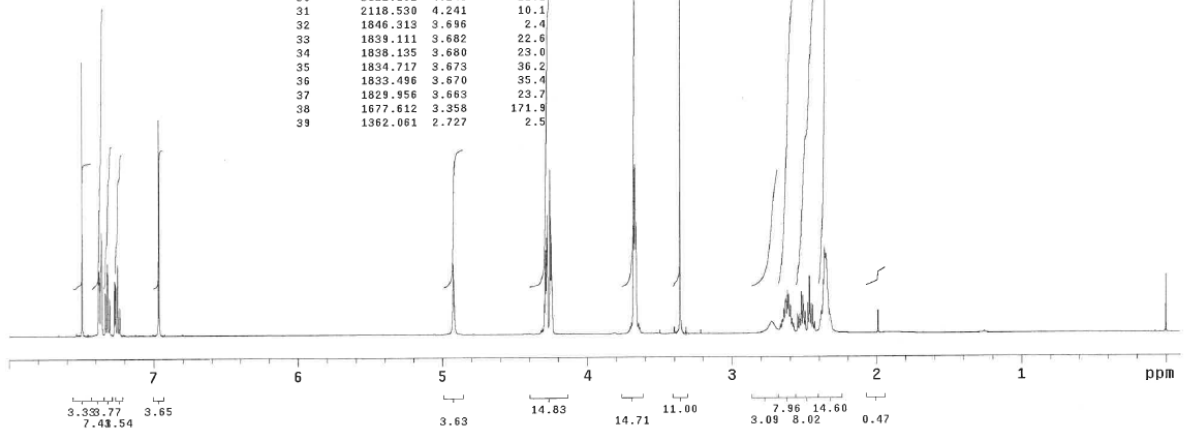

STANDARD 13C  
 82179  
 1939-BGE  
 Berecz Gabor  
 2006.02.24. (CzB)  
 Solvent: CDCl3  
 Temp. 25.0 C / 298.1 K  
 User: 1-10-87  
 INOVA-500 "1500"  
 PULSE SEQUENCE  
 Relax. delay 3.000 sec  
 Pulse 6.0 usec  
 Acq. time 1.300 sec  
 Width 32000.0 Hz  
 416 repetitions  
 OBSERVE C13, 125.6055347 MHz  
 DECOUPLE H1, 499.5269647 MHz  
 Power 32 dB  
 continuously on  
 WALTZ-16 modulated  
 DATA PROCESSING  
 Line broadening 0.5 Hz  
 FT size 131072  
 Total time 29 minutes

| INDEX | FREQUENCY | PPM     | HEIGHT |
|-------|-----------|---------|--------|
| 1     | 18366.707 | 146.214 | 53.6   |
| 2     | 17927.742 | 142.720 | 52.4   |
| 3     | 17523.933 | 139.505 | 11.4   |
| 4     | 17440.437 | 138.840 | 38.3   |
| 5     | 16660.652 | 132.632 | 16.8   |
| 6     | 16426.785 | 130.771 | 27.3   |
| 7     | 16246.101 | 129.332 | 14.0   |
| 8     | 16184.578 | 128.843 | 76.8   |
| 9     | 16034.676 | 127.649 | 79.2   |
| 10    | 16003.914 | 127.404 | 68.3   |
| 11    | 14829.598 | 118.056 | 83.7   |
| 12    | 14804.695 | 117.858 | 16.3   |
| 13    | 9704.598  | 77.257  | 151.7  |
| 14    | 9672.371  | 77.000  | 139.6  |
| 15    | 9640.633  | 76.747  | 132.3  |
| 16    | 8399.910  | 66.870  | 158.2  |
| 17    | 8213.875  | 65.389  | 8.0    |
| 18    | 8114.265  | 64.596  | 78.2   |
| 19    | 8059.090  | 64.157  | 77.3   |
| 20    | 7309.090  | 58.186  | 75.5   |
| 21    | 6736.356  | 53.627  | 107.8  |
| 22    | 5540.535  | 44.107  | 65.5   |
| 23    | 4767.098  | 37.950  | 36.4   |

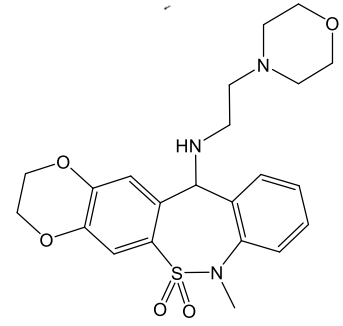

54c

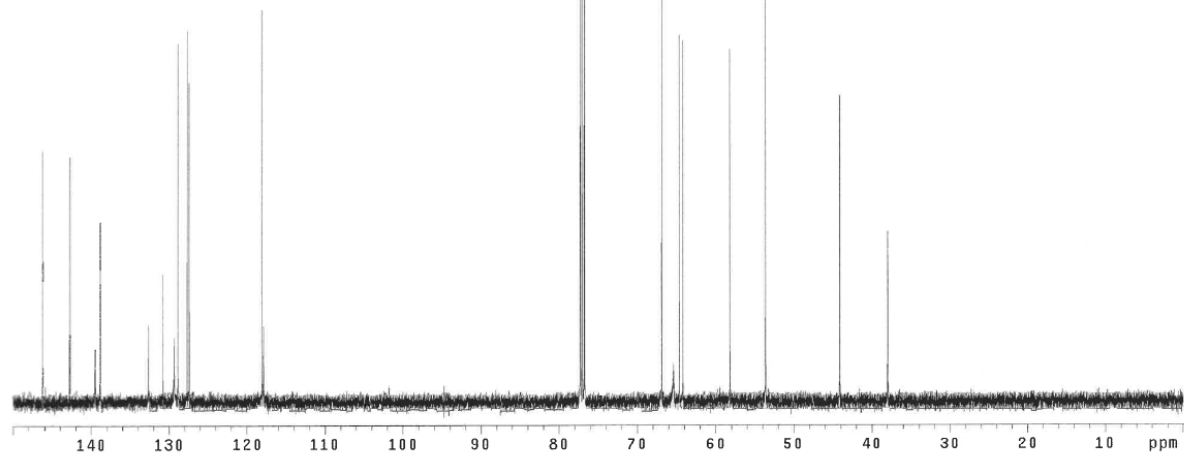

STANDARD 1H  
62209  
1940-BGE  
Berez Gabor  
2006.02.24. (DA)  
Solvent: CDCl3  
Temp. 25.0 C / 298.1 K  
File: 62209h  
INOVA-500 "1500"  
PULSE SEQUENCE  
Pulse 6.4 usec  
Acq. time 5.000 sec  
Width 8000.0 Hz  
16 repetitions  
OBSERVE H1, 499.5244654 MHz  
DATA PROCESSING  
FT size 131072  
Total time 1 minute

| INDEX | FREQUENCY PPM | HEIGHT | INDEX | FREQUENCY PPM | HEIGHT |
|-------|---------------|--------|-------|---------------|--------|
| 1     | 3743.408      | 7.494  | 40    | 1192.627      | 2.388  |
| 2     | 3685.303      | 7.378  | 41    | 991.943       | 1.986  |
| 3     | 3683.838      | 7.375  | 42    | 854.736       | 1.711  |
| 4     | 3677.734      | 7.362  | 43    | 848.022       | 1.698  |
| 5     | 3676.270      | 7.360  | 44    | 841.309       | 1.684  |
| 6     | 3674.194      | 7.355  | 45    | -0.000        | -0.000 |
| 7     | 3672.729      | 7.352  |       |               |        |
| 8     | 3666.260      | 7.339  |       |               |        |
| 9     | 3664.817      | 7.337  |       |               |        |
| 10    | 3657.227      | 7.321  |       |               |        |
| 11    | 3655.640      | 7.318  |       |               |        |
| 12    | 3650.024      | 7.307  |       |               |        |
| 13    | 3648.437      | 7.304  |       |               |        |
| 14    | 3642.212      | 7.291  |       |               |        |
| 15    | 3632.812      | 7.273  |       |               |        |
| 16    | 3628.174      | 7.263  |       |               |        |
| 17    | 3626.587      | 7.260  |       |               |        |
| 18    | 3620.728      | 7.248  |       |               |        |
| 19    | 3619.263      | 7.245  |       |               |        |
| 20    | 3494.629      | 6.996  |       |               |        |
| 21    | 2494.385      | 4.994  |       |               |        |
| 22    | 2140.991      | 4.286  |       |               |        |
| 23    | 2140.259      | 4.285  |       |               |        |
| 24    | 2137.329      | 4.279  |       |               |        |
| 25    | 2132.835      | 4.270  |       |               |        |
| 26    | 2122.681      | 4.249  |       |               |        |
| 27    | 2120.972      | 4.246  |       |               |        |
| 28    | 2119.263      | 4.243  |       |               |        |
| 29    | 2117.554      | 4.239  |       |               |        |
| 30    | 2115.845      | 4.236  |       |               |        |
| 31    | 2114.136      | 4.232  |       |               |        |
| 32    | 1838.478      | 3.682  |       |               |        |
| 33    | 1834.839      | 3.673  |       |               |        |
| 34    | 1830.200      | 3.664  |       |               |        |
| 35    | 1660.034      | 3.323  | 162.0 |               |        |
| 36    | 1289.551      | 2.582  | 14.2  |               |        |
| 37    | 1210.693      | 2.424  | 22.7  |               |        |
| 38    | 1206.787      | 2.416  | 33.8  |               |        |
| 39    | 1199.707      | 2.402  | 36.6  |               |        |

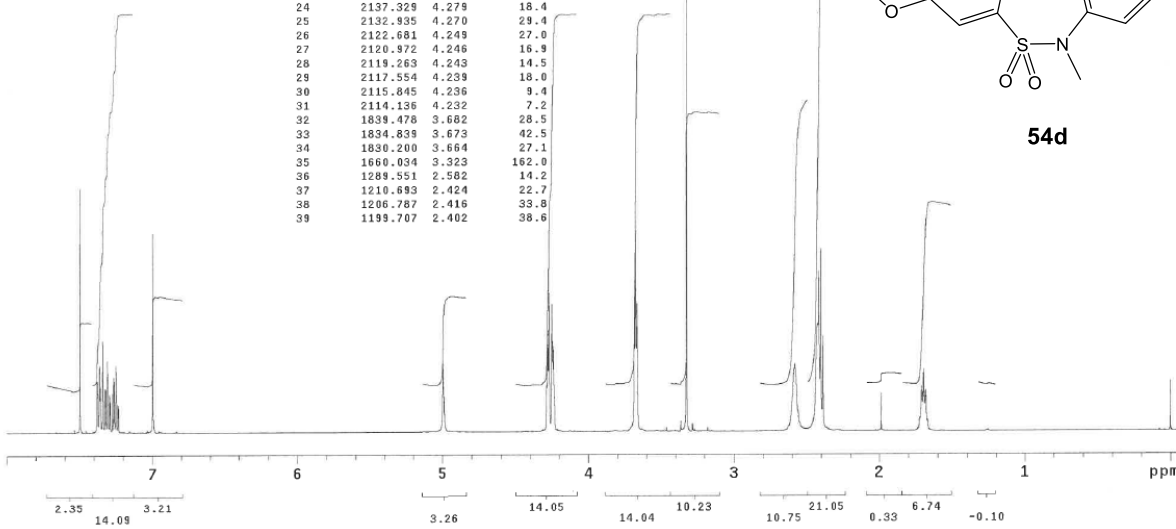

STANDARD 13C  
62209  
1940-BGE  
Berez Gabor  
2006.02.24. (DA)  
Solvent: CDCl3  
Temp. 25.0 C / 298.1 K  
Sample #5, user 1-14-87  
INOVA-500 "1500"  
PULSE SEQUENCE  
Relax. delay 1.200 sec  
Pulse 6.0 usec  
Acq. time 1.300 sec  
Width 32000.0 Hz  
8192 repetitions  
OBSERVE C13, 125.6055371 MHz  
DECOUPLE H1, 499.5268647 MHz  
Power 32 dB  
continuously on  
WALTZ-16 modulated  
DATA PROCESSING  
Line broadening 0.5 Hz  
FT size 131072  
Total time 5.7 hours

| INDEX | FREQUENCY PPM | HEIGHT  |
|-------|---------------|---------|
| 1     | 18379.891     | 146.319 |
| 2     | 17909.676     | 142.576 |
| 3     | 17529.305     | 139.548 |
| 4     | 17438.484     | 138.825 |
| 5     | 16696.785     | 132.920 |
| 6     | 16378.914     | 130.390 |
| 7     | 16213.387     | 129.072 |
| 8     | 16163.094     | 128.671 |
| 9     | 16019.539     | 127.529 |
| 10    | 15996.590     | 127.346 |
| 11    | 14838.387     | 118.126 |
| 12    | 14745.613     | 117.387 |
| 13    | 9704.598      | 77.257  |
| 14    | 8672.371      | 77.000  |
| 15    | 9540.933      | 76.747  |
| 16    | 8401.375      | 66.882  |
| 17    | 8112.801      | 64.585  |
| 18    | 8056.160      | 64.134  |
| 19    | 7190.438      | 57.242  |
| 20    | 6747.078      | 53.712  |
| 21    | 5854.500      | 46.607  |
| 22    | 4762.703      | 37.915  |
| 23    | 3324.715      | 26.467  |

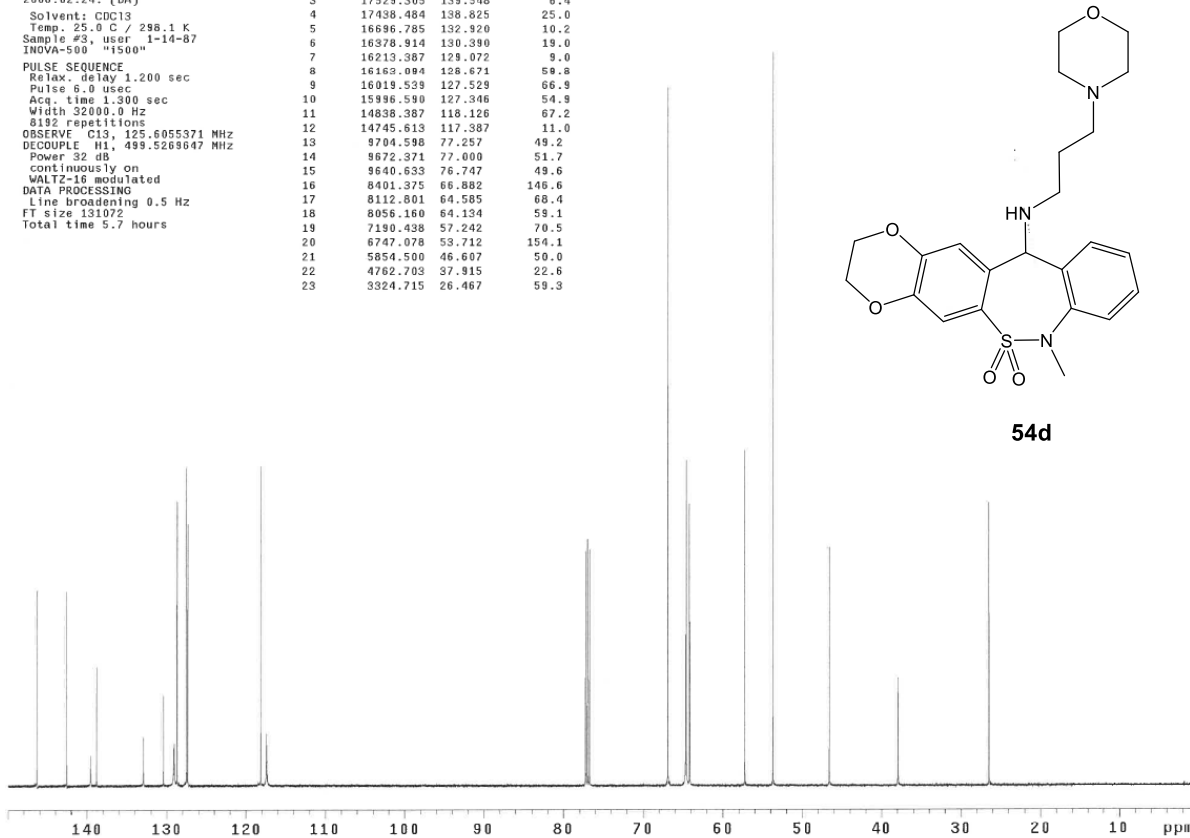

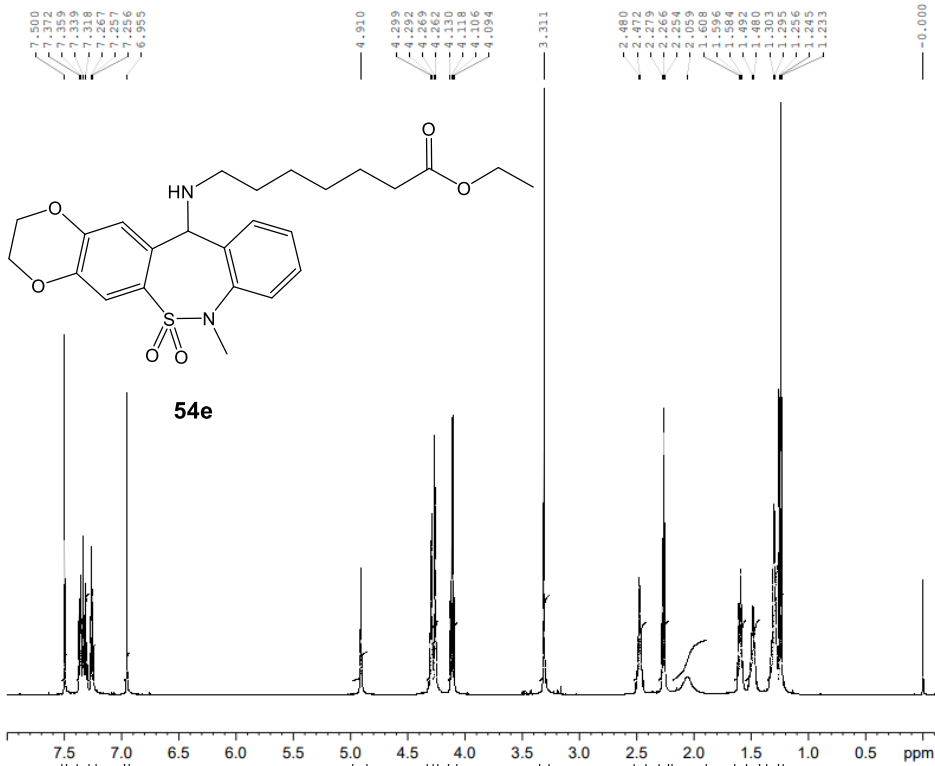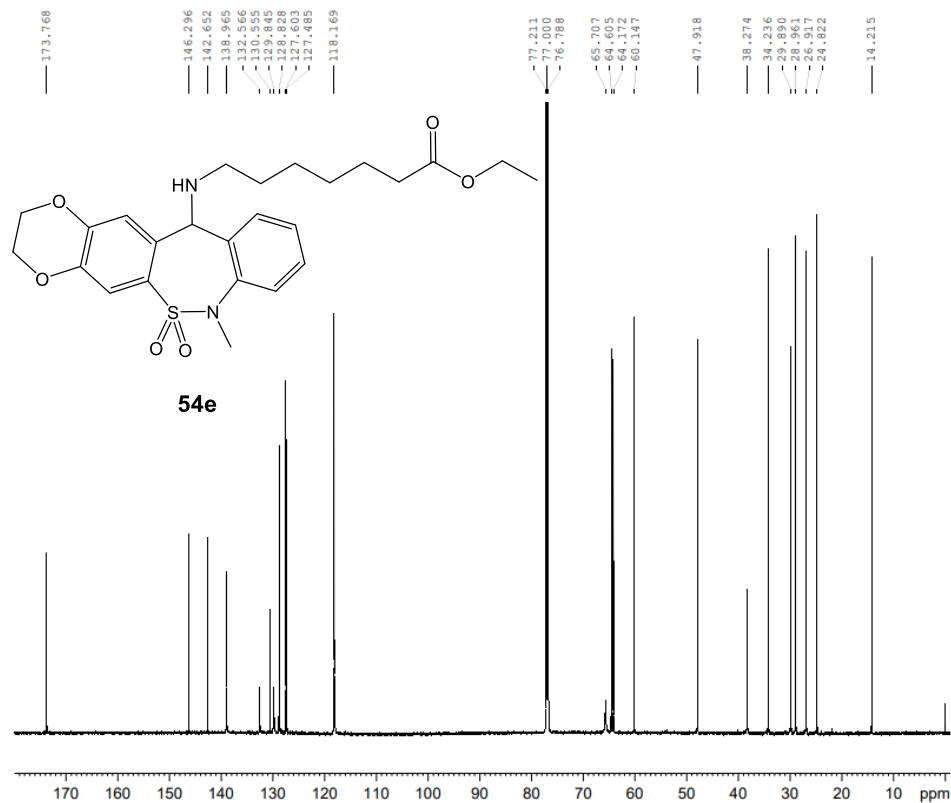



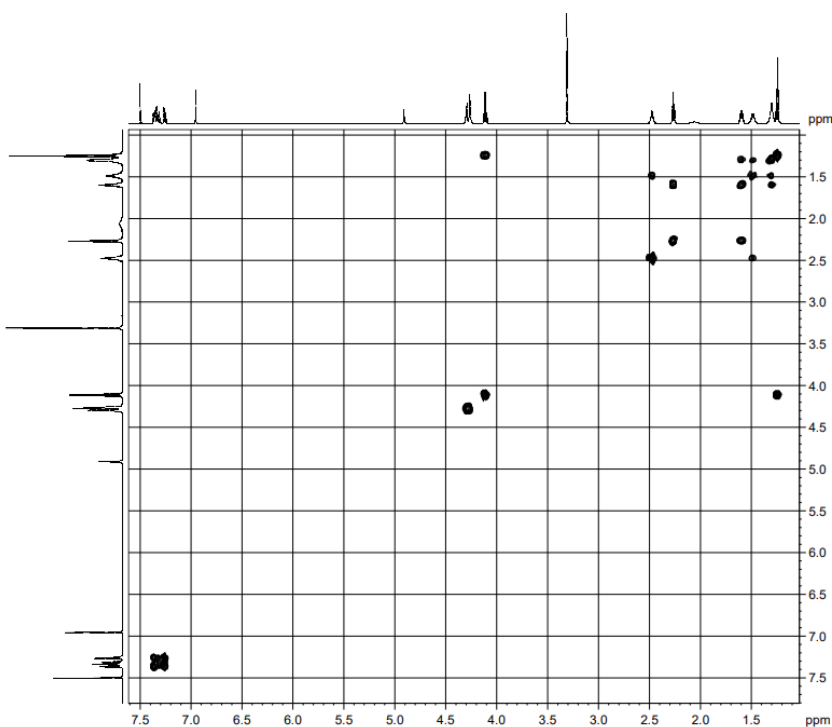

**COSY**  
 144500  
 BGE1941-1941-BGE\_1  
 Berecz Gabor  
 2025.04.09. (KP)

Current Data Parameters  
 NAME 144500  
 EXPNO 13  
 PROCNO 1  
 F2 - Acquisition Parameters  
 Date\_ 20250409  
 Time\_ 8:41 h  
 INSTRUM spect  
 PROCNO 144500\_0017\_1  
 FIDPROC cosyppm2d  
 TD 2048  
 SOLVENT CDCl3  
 NS 2  
 DS 2  
 SWH 7812.330 Hz  
 FIDRES 7.423970 Hz  
 AQ 0.1110730 sec  
 RG 186.00  
 DW 64.000 usec  
 DE 19.00 usec  
 TE 300.2 K  
 D0 0.0000000 sec  
 D1 2.0000000 sec  
 D15 0.0000000 sec  
 D16 0.0000000 sec  
 LHM 0.0001800 sec  
 TDW 600.0000000 MHz  
 SFO1 600.0000000 MHz  
 F1 11.00 usec  
 FWHM 28.0000000 W  
 SFRM(1) SMO10.100  
 SPS1 4.000 %  
 SFRM(2) SMO10.100  
 SPS2 4.000 %  
 SFRM(3) SMO10.100  
 SPS3 4.000 %  
 P16 1000.00 usec

F1 - Acquisition parameters  
 TD 256  
 SFO1 600.0000000 MHz  
 FIDRES 61.0018120 Hz  
 DW 186.00  
 FWHM 13.021 ppm

F2 - Processing parameters  
 SI 3274  
 SF 600.0000000 MHz  
 SWH 7812.330 Hz  
 LB 0 Hz  
 GB 0  
 PC 1.40

F1 - Processing parameters  
 SI 1024  
 SF 600.0000000 MHz  
 SWH 7812.330 Hz  
 LB 0 Hz  
 GB 0

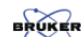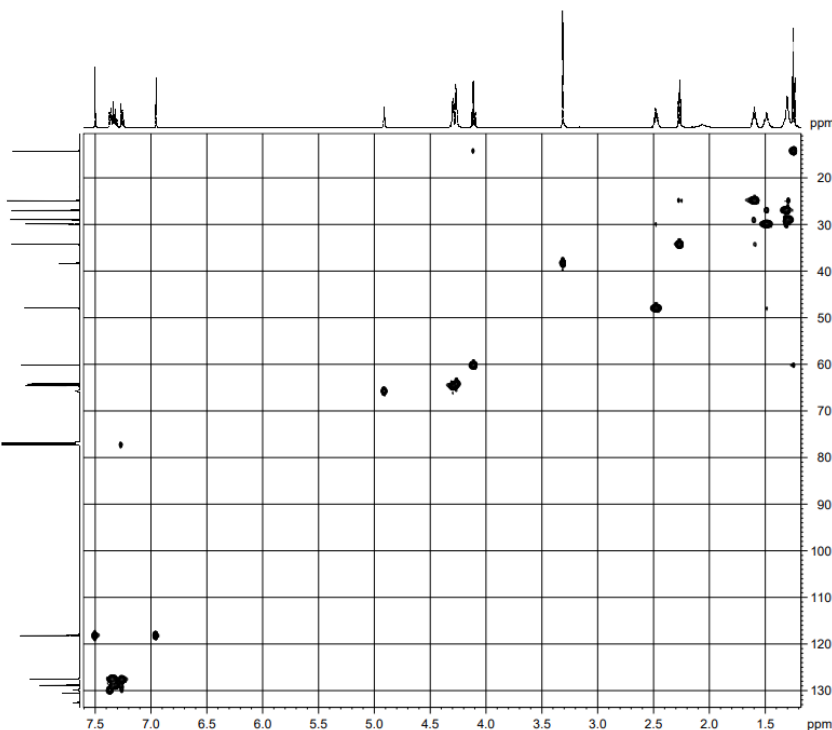

**HSQC (140Hz)**  
 144500  
 BGE1941-1941-BGE\_1  
 Berecz Gabor  
 2025.04.09. (KP)

Current Data Parameters  
 NAME 144500  
 EXPNO 14  
 PROCNO 1  
 F2 - Acquisition Parameters  
 Date\_ 20250409  
 Time\_ 8:41 h  
 INSTRUM spect  
 PROCNO 144500\_0017\_2  
 FIDPROC hsqc140hz  
 TD 2048  
 SOLVENT CDCl3  
 NS 2  
 DS 2  
 SWH 7812.330 Hz  
 FIDRES 7.423970 Hz  
 AQ 0.1110730 sec  
 RG 186.00  
 DW 64.000 usec  
 DE 19.00 usec  
 TE 300.2 K  
 D0 0.0000000 sec  
 D1 2.0000000 sec  
 D15 0.0000000 sec  
 D16 0.0000000 sec  
 LHM 0.0001800 sec  
 TDW 600.0000000 MHz  
 SFO1 600.0000000 MHz  
 F1 11.00 usec  
 FWHM 28.0000000 W  
 SFRM(1) SMO10.100  
 SPS1 4.000 %  
 SFRM(2) SMO10.100  
 SPS2 4.000 %  
 SFRM(3) SMO10.100  
 SPS3 4.000 %  
 P16 1000.00 usec

F1 - Acquisition parameters  
 TD 256  
 SFO1 600.0000000 MHz  
 FIDRES 61.0018120 Hz  
 DW 186.00  
 FWHM 13.021 ppm

F2 - Processing parameters  
 SI 1024  
 SF 600.0000000 MHz  
 SWH 7812.330 Hz  
 LB 0 Hz  
 GB 0

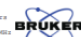

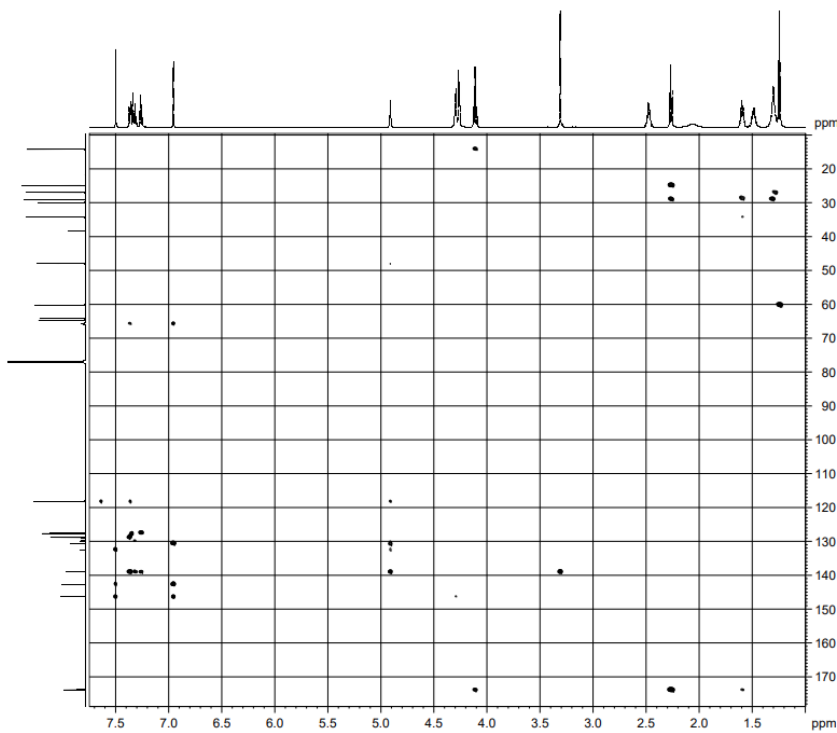

HMBC (8Hz, 140Hz) **54e**  
 144500  
 BGE1941-1941-BGE\_1  
 Berecz Gabor  
 2025.04.09. (KP)

```

Current Data Parameters
NAME      144500
EXPNO    15
PROCNO   1

F2 - Acquisition Parameters
Date_     20250409
Time     10:02 h
INSTRUM  spect
PROBHD   5143816 002 1
PULPROG  zgpg30
TD        32768
SOLVENT  DMSO-d6
NS        4
DS        4
SWH       7812.350 Hz
FIDRES    7.420390 Hz
AQ         0.111370 sec
RG         186.01
WDW        EM
SSB        0
LB         29.00 uHz
GB         0
PC         140.000000
CHST2     0.000000
DELTA     0.000000 sec
DELTA2    0.000000 sec
DELTA3    0.000000 sec
DELTA4    0.000000 sec
DELTA5    0.000000 sec
DELTA6    0.000000 sec
DELTA7    0.000000 sec
DELTA8    0.000000 sec
DELTA9    0.000000 sec
TEMP      300.2 K
SFO1      400.0027800 MHz
NUC1       13
P1         15.00 usec
PL1        0.00 dB
SFO2      125.0000000 MHz
NUC2       13
P2         12.00 usec
PL2        0.00 dB
SFO3      72.6398000 MHz
SFO4      500.1360000 MHz
SFO5      500.1360000 MHz
SFO6      500.1360000 MHz
SFO7      500.1360000 MHz
SFO8      500.1360000 MHz
SFO9      500.1360000 MHz
SFO10     500.1360000 MHz
SFO11     500.1360000 MHz
SFO12     500.1360000 MHz
SFO13     500.1360000 MHz
SFO14     500.1360000 MHz
SFO15     500.1360000 MHz
SFO16     500.1360000 MHz
SFO17     500.1360000 MHz
SFO18     500.1360000 MHz
SFO19     500.1360000 MHz
SFO20     500.1360000 MHz
SFO21     500.1360000 MHz
SFO22     500.1360000 MHz
SFO23     500.1360000 MHz
SFO24     500.1360000 MHz
SFO25     500.1360000 MHz
SFO26     500.1360000 MHz
SFO27     500.1360000 MHz
SFO28     500.1360000 MHz
SFO29     500.1360000 MHz
SFO30     500.1360000 MHz
SFO31     500.1360000 MHz
SFO32     500.1360000 MHz
SFO33     500.1360000 MHz
SFO34     500.1360000 MHz
SFO35     500.1360000 MHz
SFO36     500.1360000 MHz
SFO37     500.1360000 MHz
SFO38     500.1360000 MHz
SFO39     500.1360000 MHz
SFO40     500.1360000 MHz
SFO41     500.1360000 MHz
SFO42     500.1360000 MHz
SFO43     500.1360000 MHz
SFO44     500.1360000 MHz
SFO45     500.1360000 MHz
SFO46     500.1360000 MHz
SFO47     500.1360000 MHz
SFO48     500.1360000 MHz
SFO49     500.1360000 MHz
SFO50     500.1360000 MHz
SFO51     500.1360000 MHz
SFO52     500.1360000 MHz
SFO53     500.1360000 MHz
SFO54     500.1360000 MHz
SFO55     500.1360000 MHz
SFO56     500.1360000 MHz
SFO57     500.1360000 MHz
SFO58     500.1360000 MHz
SFO59     500.1360000 MHz
SFO60     500.1360000 MHz
SFO61     500.1360000 MHz
SFO62     500.1360000 MHz
SFO63     500.1360000 MHz
SFO64     500.1360000 MHz
SFO65     500.1360000 MHz
SFO66     500.1360000 MHz
SFO67     500.1360000 MHz
SFO68     500.1360000 MHz
SFO69     500.1360000 MHz
SFO70     500.1360000 MHz
SFO71     500.1360000 MHz
SFO72     500.1360000 MHz
SFO73     500.1360000 MHz
SFO74     500.1360000 MHz
SFO75     500.1360000 MHz
SFO76     500.1360000 MHz
SFO77     500.1360000 MHz
SFO78     500.1360000 MHz
SFO79     500.1360000 MHz
SFO80     500.1360000 MHz
SFO81     500.1360000 MHz
SFO82     500.1360000 MHz
SFO83     500.1360000 MHz
SFO84     500.1360000 MHz
SFO85     500.1360000 MHz
SFO86     500.1360000 MHz
SFO87     500.1360000 MHz
SFO88     500.1360000 MHz
SFO89     500.1360000 MHz
SFO90     500.1360000 MHz
SFO91     500.1360000 MHz
SFO92     500.1360000 MHz
SFO93     500.1360000 MHz
SFO94     500.1360000 MHz
SFO95     500.1360000 MHz
SFO96     500.1360000 MHz
SFO97     500.1360000 MHz
SFO98     500.1360000 MHz
SFO99     500.1360000 MHz
SFO100    500.1360000 MHz
  
```

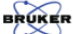

STANDARD 1H  
 62547  
 1942-BGE  
 Berecz Gabor  
 2006\_03.16. (CzB)  
 Solvent: CDCl3  
 Temp. 25.0 C / 298.1 K  
 INOVA-500 "1500"  
 PULSE SEQUENCE  
 Relax. delay 1.000 sec  
 Pulse 6.4 usec  
 Acq. time 5.000 sec  
 Width 8000.0 Hz  
 16 repetitions  
 OBSERVE H1, 499.5244638 MHz  
 DATA PROCESSING  
 FT size 131072  
 Total time 1 minutes

| INDEX | FREQUENCY PPM | HEIGHT | INDEX | FREQUENCY PPM | HEIGHT  |       |
|-------|---------------|--------|-------|---------------|---------|-------|
| 1     | 4047.607      | 8.103  | 10.5  | 40            | 762.817 | 1.527 |
| 2     | 3745.239      | 7.498  | 67.1  | 41            | 755.005 | 1.511 |
| 3     | 3734.985      | 7.477  | 21.8  | 42            | 744.507 | 1.490 |
| 4     | 3677.368      | 7.362  | 6.9   | 43            | 738.525 | 1.478 |
| 5     | 3676.270      | 7.360  | 6.4   | 44            | 731.812 | 1.465 |
| 6     | 3669.434      | 7.346  | 19.5  | 45            | 724.487 | 1.450 |
| 7     | 3662.354      | 7.332  | 13.0  | 46            | 626.343 | 1.254 |
| 8     | 3652.344      | 7.312  | 28.2  | 47            | 0.000   | 0.000 |
| 9     | 3651.489      | 7.310  | 29.1  |               |         |       |
| 10    | 3644.531      | 7.296  | 14.8  |               |         |       |
| 11    | 3633.911      | 7.275  | 6.6   |               |         |       |
| 12    | 3625.244      | 7.257  | 13.7  |               |         |       |
| 13    | 3617.676      | 7.242  | 21.0  |               |         |       |
| 14    | 3610.474      | 7.228  | 9.8   |               |         |       |
| 15    | 3531.128      | 7.069  | 57.9  |               |         |       |
| 16    | 2810.107      | 5.225  | 40.6  |               |         |       |
| 17    | 2154.053      | 4.312  | 5.7   |               |         |       |
| 18    | 2151.001      | 4.306  | 7.5   |               |         |       |
| 19    | 2148.193      | 4.300  | 8.7   |               |         |       |
| 20    | 2142.578      | 4.289  | 21.1  |               |         |       |
| 21    | 2138.550      | 4.281  | 25.9  |               |         |       |
| 22    | 2135.864      | 4.276  | 35.0  |               |         |       |
| 23    | 2130.127      | 4.264  | 46.4  |               |         |       |
| 24    | 1805.713      | 3.214  | 160.8 |               |         |       |
| 25    | 1276.733      | 2.556  | 7.7   |               |         |       |
| 26    | 1274.536      | 2.551  | 8.2   |               |         |       |
| 27    | 1270.752      | 2.544  | 8.2   |               |         |       |
| 28    | 1268.677      | 2.540  | 8.4   |               |         |       |
| 29    | 1265.991      | 2.534  | 8.2   |               |         |       |
| 30    | 1260.132      | 2.523  | 5.8   |               |         |       |
| 31    | 1217.041      | 2.436  | 5.5   |               |         |       |
| 32    | 1210.327      | 2.423  | 9.1   |               |         |       |
| 33    | 1201.904      | 2.406  | 8.3   |               |         |       |
| 34    | 1199.463      | 2.401  | 7.9   |               |         |       |
| 35    | 1108.521      | 2.219  | 20.6  |               |         |       |
| 36    | 1101.196      | 2.204  | 42.1  |               |         |       |
| 37    | 1093.872      | 2.190  | 22.2  |               |         |       |
| 38    | 776.367       | 1.554  | 13.7  |               |         |       |
| 39    | 769.653       | 1.541  | 20.1  |               |         |       |

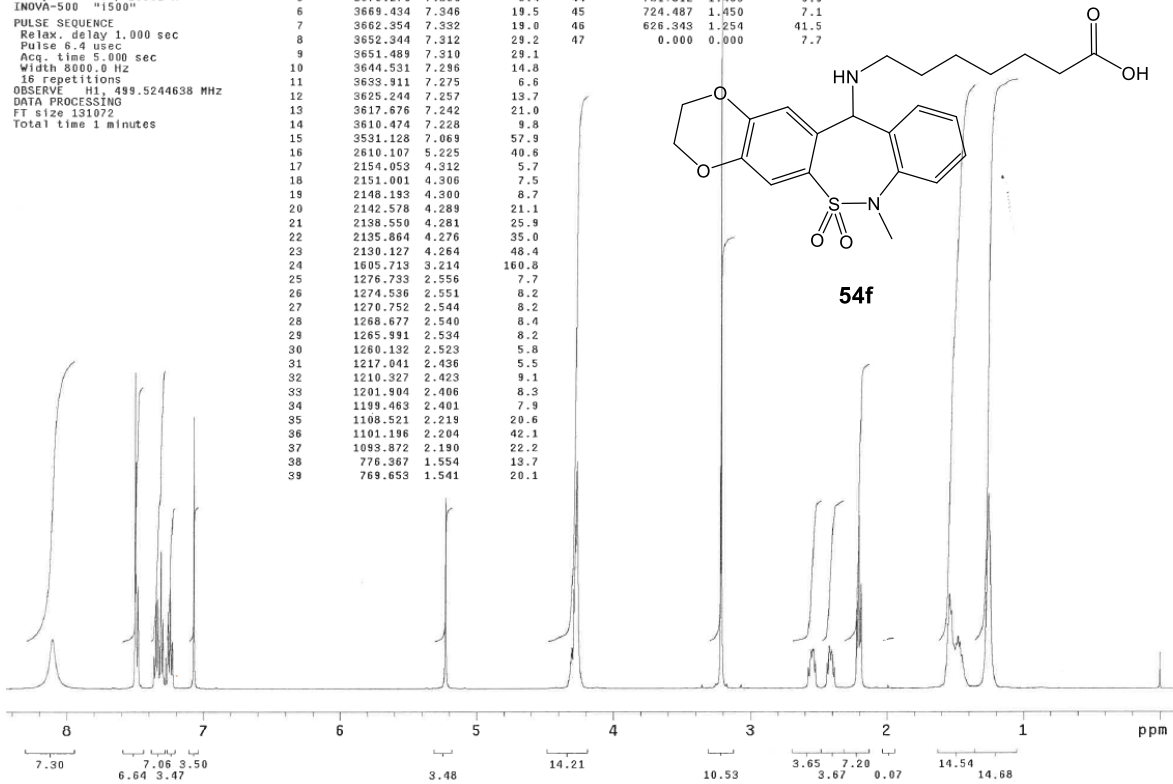

STANDARD 13C  
 62547  
 1942-BGE  
 Berecz Gabor  
 2006\_03.16. (CzB)  
 Solvent: CDCl3  
 Temp. 25.0 C / 298.1 K  
 User: 1-14-87  
 INOVA-500 "1500"  
 PULSE SEQUENCE  
 Relax. delay 3.000 sec  
 Pulse 6.0 usec  
 Acq. time 1.300 sec  
 Width 32000.0 Hz  
 688 repetitions  
 OBSERVE C13, 125.6055371 MHz  
 DECOUPLE H1, 499.5269647 MHz  
 Power 32 dB  
 continuously on  
 WALTZ-16 modulated  
 DATA PROCESSING  
 Line broadening 0.5 Hz  
 FT size 131072  
 Total time 49 minutes

| INDEX | FREQUENCY PPM | HEIGHT  |       |
|-------|---------------|---------|-------|
| 1     | 22379.891     | 178.162 | 61.0  |
| 2     | 18417.000     | 146.614 | 79.6  |
| 3     | 17986.824     | 143.190 | 76.8  |
| 4     | 17558.602     | 139.781 | 50.3  |
| 5     | 16852.547     | 134.160 | 7.7   |
| 6     | 16542.000     | 131.688 | 13.7  |
| 7     | 16379.402     | 130.393 | 49.1  |
| 8     | 16284.676     | 129.639 | 54.0  |
| 9     | 16181.160     | 128.815 | 11.3  |
| 10    | 16002.938     | 127.396 | 62.7  |
| 11    | 15970.711     | 127.140 | 64.1  |
| 12    | 15117.684     | 120.349 | 15.9  |
| 13    | 14838.875     | 118.130 | 70.5  |
| 14    | 9704.109      | 77.253  | 151.4 |
| 15    | 9672.371      | 77.000  | 162.0 |
| 16    | 9640.145      | 76.743  | 154.1 |
| 17    | 8237.313      | 65.576  | 15.2  |
| 18    | 8103.523      | 64.511  | 60.5  |
| 19    | 8064.849      | 64.204  | 58.3  |
| 20    | 5881.356      | 46.820  | 52.2  |
| 21    | 4877.938      | 38.832  | 47.7  |
| 22    | 4416.512      | 35.159  | 56.2  |
| 23    | 3634.285      | 28.332  | 93.8  |
| 24    | 3590.340      | 28.582  | 63.5  |
| 25    | 3364.754      | 26.786  | 86.8  |
| 26    | 3155.770      | 25.123  | 85.9  |

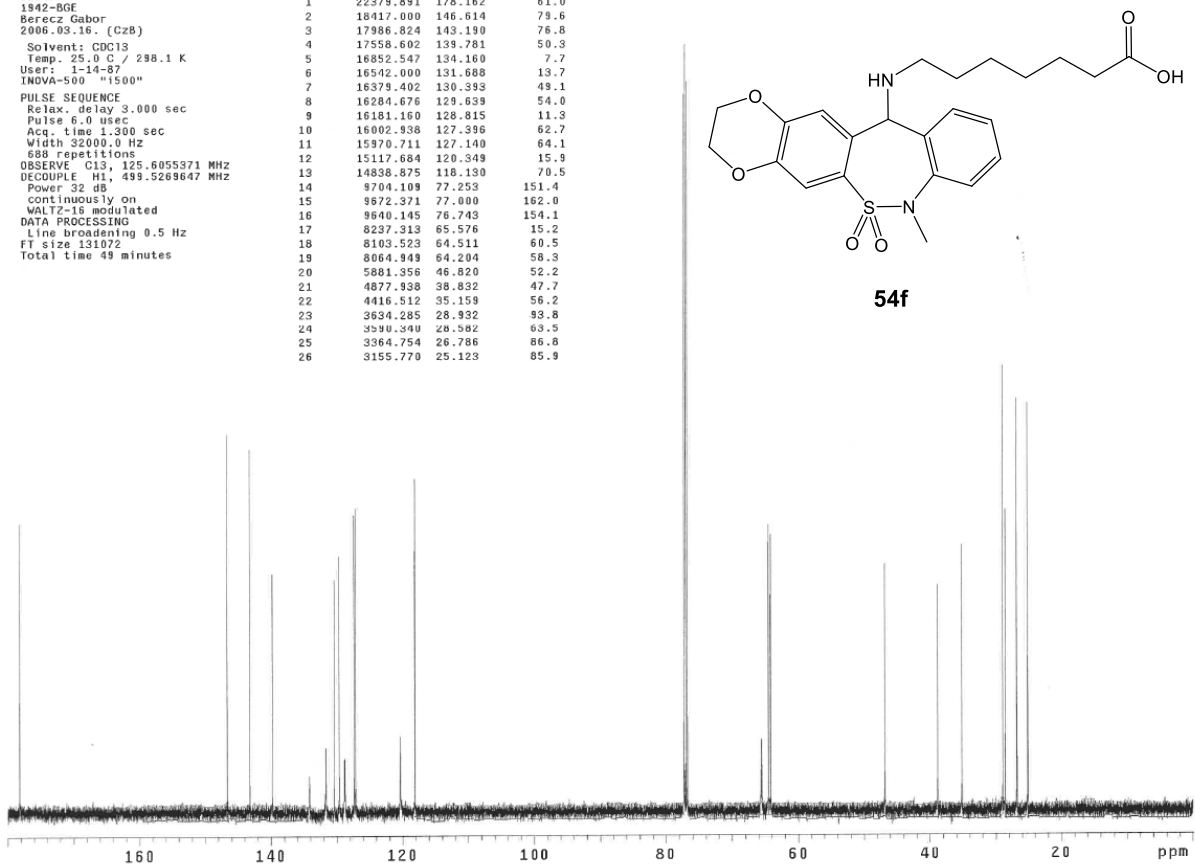

Supplement: Additional file 1 [file 1860-5397-21-205-S1.pdf]
