# Supplementary material for: Synthesis of new tetra- and pentacyclic, methylenedioxy- and ethylenedioxy-substituted derivatives of the dibenzo[ c , f ][1,2]thiazepine ring system
Source: publisher site journal article supplement (doi:10.3762/bjoc.21.205), 2025-12-09

You have not supplied any structure factors. As a result the full set of tests cannot be run.

No syntax errors found. CIF dictionary Interpreting this report

|                 |                |                    |               |
|-----------------|----------------|--------------------|---------------|
| Bond precision: | C-C = 0.0029 A | Wavelength=1.54187 |               |
| Cell:           | a=8.8017 (4)   | b=15.2880 (6)      | c=12.7533 (5) |
|                 | alpha=90       | beta=97.430 (2)    | gamma=90      |
| Temperature:    | 293 K          |                    |               |

```
Correction method= # Reported T Limits: Tmin=0.353 Tmax=0.638
AbsCorr = MULTI-SCAN
```

```
R(reflections)= 0.0427( 11055)      wR2(reflections)=
S = 1.162                          0.0642( 11129)
Npar= 267
```

---

The following ALERTS were generated. Each ALERT has the format

**test-name\_ALERT\_alert-type\_alert-level.**

Click on the hyperlinks for more details of the test.

---

### Alert level A

PLAT097\_ALERT\_2\_A Large Reported Max. (Positive) Residual Density 4.89 eA-3

**Author Response: Although the residual density is out of border but there is no doubt about the chemical structure taking into account other evidences, e.g. NMR. The error maybe due to crystal imperfections.**

---

### Alert level B

DIFMN02\_ALERT\_2\_B The minimum difference density is < -0.1\*ZMAX\*1.00

\_refine\_diff\_density\_min given = -3.400

Test value = -1.700

REFLT02\_ALERT\_1\_B The number of reflections greater than the sigma threshold

cannot exceed the number of symmetry-independent reflections

Number of symmetry-independent reflections = 3204

Number of reflections greater than sigma threshold = 11055

PLAT098\_ALERT\_2\_B Large Reported Min. (Negative) Residual Density -3.40 eA-3

PLAT213\_ALERT\_2\_B Atom C22 has ADP max/min Ratio ..... 4.6 prolat

PLAT230\_ALERT\_2\_B Hirshfeld Test Diff for S1 --O1 . 8.8 s.u.

PLAT230\_ALERT\_2\_B Hirshfeld Test Diff for S1 --N1 . 10.5 s.u.

PLAT241\_ALERT\_2\_B High 'MainMol' Ueq as Compared to Neighbors of C22 Check

PLAT242\_ALERT\_2\_B Low 'MainMol' Ueq as Compared to Neighbors of O5 Check

PLAT360\_ALERT\_2\_B Short C(sp3)-C(sp3) Bond C22 - C25 . 1.32 Ang.

PLAT703\_ALERT\_1\_B Torsion Calc -50.01(14), Rep -50.40(19), Dev.. 2.79 Sigma

O(7)-S(1)-C(15-C(9) 1\_555 1\_555 1\_555 1\_555 # 7 Check

PLAT703\_ALERT\_1\_B Torsion Calc 55.83(15), Rep 56.2(2), Dev.. 2.47 Sigma

C(24-S(3)-C(14-C(19) 1\_555 1\_555 1\_555 1\_555 # 15 Check

PLAT703\_ALERT\_1\_B Torsion Calc 85.4(2), Rep 86.0(3), Dev.. 3.00 Sigma

C(12-N(1)-C(23-C(24) 1\_555 1\_555 1\_555 1\_555 # 25 Check

PLAT703\_ALERT\_1\_B Torsion Calc 100.4(2), Rep 99.9(2), Dev.. 2.50 Sigma

C(23-N(1)-C(12-C(11) 1\_555 1\_555 1\_555 1\_555 # 26 Check

PLAT703\_ALERT\_1\_B Torsion Calc 176.68(17), Rep 177.1(2), Dev.. 2.47 Sigma

C(13-C(10-C(16-C(14) 1\_555 1\_555 1\_555 1\_555 # 33 Check

PLAT703\_ALERT\_1\_B Torsion Calc -179.45(16), Rep -179.8(2), Dev.. 2.19 Sigma

C(12-C(11-C(20-O(4) 1\_555 1\_555 1\_555 1\_555 # 36 Check

PLAT703\_ALERT\_1\_B Torsion Calc 5.1(3), Rep 4.4(3), Dev.. 2.33 Sigma

N(1)-C(12-C(16-C(14) 1\_555 1\_555 1\_555 1\_555 # 41 Check

PLAT703\_ALERT\_1\_B Torsion Calc -174.66(17), Rep -175.1(2), Dev.. 2.59 Sigma

C(11-C(12-C(16-C(14) 1\_555 1\_555 1\_555 1\_555 # 43 Check

PLAT703\_ALERT\_1\_B Torsion Calc 66.3(2), Rep 66.9(2), Dev.. 3.00 Sigma

S(3)-C(14-C(16-C(12) 1\_555 1\_555 1\_555 1\_555 # 49 Check

PLAT703\_ALERT\_1\_B Torsion Calc 118.49(19), Rep 118.1(2), Dev.. 2.05 Sigma

C(19-C(14-C(16-C(10) 1\_555 1\_555 1\_555 1\_555 # 54 Check

PLAT703\_ALERT\_1\_B Torsion Calc -65.3(2), Rep -64.8(3), Dev.. 2.50 Sigma

C(19-C(14-C(16-C(12) 1\_555 1\_555 1\_555 1\_555 # 55 Check

---

### Alert level C

DIFMN03\_ALERT\_1\_C The minimum difference density is < -0.1\*ZMAX\*0.75  
The relevant atom site should be identified.

DIFMX02\_ALERT\_1\_C The maximum difference density is > 0.1\*ZMAX\*0.75  
The relevant atom site should be identified.

PLAT029\_ALERT\_3\_C \_diffn\_measured\_fraction\_theta\_full value Low . 0.962 Why?

PLAT166\_ALERT\_4\_C S.U's Given on Coordinates for Calc-flagged .... H1 Note

PLAT166\_ALERT\_4\_C S.U's Given on Coordinates for Calc-flagged .... H2 Note

PLAT166\_ALERT\_4\_C S.U's Given on Coordinates for Calc-flagged .... H3 Note

PLAT166\_ALERT\_4\_C S.U's Given on Coordinates for Calc-flagged .... H4 Note

PLAT166\_ALERT\_4\_C S.U's Given on Coordinates for Calc-flagged .... H5 Note

PLAT166\_ALERT\_4\_C S.U's Given on Coordinates for Calc-flagged .... H6 Note

PLAT166\_ALERT\_4\_C S.U's Given on Coordinates for Calc-flagged .... H7 Note

PLAT166\_ALERT\_4\_C S.U's Given on Coordinates for Calc-flagged .... H8 Note

PLAT166\_ALERT\_4\_C S.U's Given on Coordinates for Calc-flagged .... H9 Note

PLAT220\_ALERT\_2\_C NonSolvent Resd 1 C Ueq(max)/Ueq(min) Range 6.0 Ratio

PLAT222\_ALERT\_3\_C NonSolvent Resd 1 H Uiso(max)/Uiso(min) Range 10.0 Ratio

PLAT230\_ALERT\_2\_C Hirshfeld Test Diff for C12 --C18 . 5.8 s.u.

PLAT230\_ALERT\_2\_C Hirshfeld Test Diff for S3 --C14 . 5.6 s.u.

PLAT230\_ALERT\_2\_C Hirshfeld Test Diff for C17 --C21 . 5.5 s.u.

PLAT242\_ALERT\_2\_C Low 'MainMol' Ueq as Compared to Neighbors of C25 Check

PLAT245\_ALERT\_2\_C U(iso) H4 Smaller than U(eq) C11 by 0.021 Ang\*\*2

PLAT351\_ALERT\_3\_C Long C-H (X0.96,N1.08A) C14 - H10 . 1.14 Ang.

PLAT351\_ALERT\_3\_C Long C-H (X0.96,N1.08A) C23 - H8 . 1.11 Ang.

PLAT410\_ALERT\_2\_C Short Intra H...H Contact H11 ..H14 . 1.91 Ang.

PLAT410\_ALERT\_2\_C Short Intra H...H Contact H12 ..H13 . 1.91 Ang.

PLAT410\_ALERT\_2\_C Short Intra H...H Contact H12 ..H13 . 1.91 Ang.

PLAT703\_ALERT\_1\_C Torsion Calc -161.66(14), Rep -161.48(19), Dev.. 1.29 Sigma

O(1)-S(1)-N(1)-C(23 1\_555 1\_555 1\_555 1\_555 # 2 Check

PLAT703\_ALERT\_1\_C Torsion Calc -103.18(15), Rep -102.9(2), Dev.. 1.87 Sigma

O(1)-S(1)-C(15-C(19 1\_555 1\_555 1\_555 1\_555 # 4 Check

PLAT703\_ALERT\_1\_C Torsion Calc 174.83(11), Rep 174.61(15), Dev.. 2.00 Sigma

O(7)-S(1)-N(1)-C(12 1\_555 1\_555 1\_555 1\_555 # 5 Check

PLAT703\_ALERT\_1\_C Torsion Calc 13.04(17), Rep 13.3(2), Dev.. 1.53 Sigma

N(1)-S(1)-C(15-C(19 1\_555 1\_555 1\_555 1\_555 # 10 Check

PLAT703\_ALERT\_1\_C Torsion Calc -70.53(13), Rep -70.67(18), Dev.. 1.08 Sigma

C(15-S(1)-N(1)-C(12 1\_555 1\_555 1\_555 1\_555 # 11 Check

PLAT703\_ALERT\_1\_C Torsion Calc -12.1(3), Rep -12.5(4), Dev.. 1.33 Sigma

C(20-O(4)-C(25-C(22 1\_555 1\_555 1\_555 1\_555 # 16 Check

PLAT703\_ALERT\_1\_C Torsion Calc -179.58(16), Rep -179.4(2), Dev.. 1.13 Sigma

C(25-O(4)-C(20-C(11 1\_555 1\_555 1\_555 1\_555 # 17 Check

PLAT703\_ALERT\_1\_C Torsion Calc 74.32(19), Rep 74.6(2), Dev.. 1.47 Sigma

S(1)-N(1)-C(12-C(16 1\_555 1\_555 1\_555 1\_555 # 23 Check

PLAT703\_ALERT\_1\_C Torsion Calc -79.3(2), Rep -79.6(3), Dev.. 1.50 Sigma

C(23-N(1)-C(12-C(16 1\_555 1\_555 1\_555 1\_555 # 27 Check

PLAT703\_ALERT\_1\_C Torsion Calc -179.13(14), Rep -178.91(18), Dev.. 1.57 Sigma

C(15-C(9)-C(18-CL(2 1\_555 1\_555 1\_555 1\_555 # 28 Check

PLAT703\_ALERT\_1\_C Torsion Calc -0.9(3), Rep -0.4(3), Dev.. 1.67 Sigma

C(15-C(9)-C(18-C(21 1\_555 1\_555 1\_555 1\_555 # 29 Check

PLAT703\_ALERT\_1\_C Torsion Calc 1.0(3), Rep 0.5(3), Dev.. 1.67 Sigma

C(18-C(9)-C(15-C(19 1\_555 1\_555 1\_555 1\_555 # 31 Check

PLAT703\_ALERT\_1\_C Torsion Calc 0.4(3), Rep -0.1(3), Dev.. 1.67 Sigma

C(13-C(10-C(16-C(12 1\_555 1\_555 1\_555 1\_555 # 32 Check

PLAT703\_ALERT\_1\_C Torsion Calc 177.08(16), Rep 177.3(2), Dev.. 1.38 Sigma

C(16-C(10-C(13-O(5) 1\_555 1\_555 1\_555 1\_555 # 34 Check

PLAT703\_ALERT\_1\_C Torsion Calc -2.3(3), Rep -1.9(4), Dev.. 1.33 Sigma

C(16-C(10-C(13-C(20 1\_555 1\_555 1\_555 1\_555 # 35 Check

|                                                 |                         |                          |
|-------------------------------------------------|-------------------------|--------------------------|
| PLAT703_ALERT_1_C Torsion Calc -178.68(16), Rep | -178.4(2), Dev..        | 1.75 Sigma               |
| N(1)-C(12-C(16-C(10                             | 1_555 1_555 1_555 1_555 | # 40 Check               |
| PLAT703_ALERT_1_C Torsion Calc                  | 1.6(3), Rep             | 2.0(4), Dev.. 1.33 Sigma |
| C(11-C(12-C(16-C(10                             | 1_555 1_555 1_555 1_555 | # 42 Check               |
| PLAT703_ALERT_1_C Torsion Calc                  | 2.0(3), Rep             | 2.4(4), Dev.. 1.33 Sigma |
| O(5)-C(13-C(20-O(4)                             | 1_555 1_555 1_555 1_555 | # 44 Check               |
| PLAT703_ALERT_1_C Torsion Calc -178.65(16), Rep | -178.4(2), Dev..        | 1.56 Sigma               |
| C(10-C(13-C(20-O(4)                             | 1_555 1_555 1_555 1_555 | # 46 Check               |
| PLAT703_ALERT_1_C Torsion Calc -109.95(16), Rep | -110.2(2), Dev..        | 1.56 Sigma               |
| S(3)-C(14-C(16-C(10                             | 1_555 1_555 1_555 1_555 | # 48 Check               |
| PLAT703_ALERT_1_C Torsion Calc -178.52(13), Rep | -178.74(18), Dev..      | 1.69 Sigma               |
| S(1)-C(15-C(19-C(17                             | 1_555 1_555 1_555 1_555 | # 57 Check               |
| PLAT703_ALERT_1_C Torsion Calc 178.65(16), Rep  | 178.9(2), Dev..         | 1.56 Sigma               |
| C(9)-C(15-C(19-C(14                             | 1_555 1_555 1_555 1_555 | # 58 Check               |

---

### Alert level G

|                                                                    |              |
|--------------------------------------------------------------------|--------------|
| PLAT005_ALERT_5_G No Embedded Refinement Details Found in the CIF  | Please Do !  |
| PLAT128_ALERT_4_G Alternate Setting for Input Space Group P21/a    | P21/c Note   |
| PLAT199_ALERT_1_G Reported _cell_measurement_temperature ..... (K) | 293 Check    |
| PLAT200_ALERT_1_G Reported _diffrn_ambient_temperature ..... (K)   | 293 Check    |
| PLAT793_ALERT_4_G Model has Chirality at C14 (Centro SpGr)         | S Verify     |
| PLAT808_ALERT_5_G No Parseable SHELXL Style Weighting Scheme Found | Please Check |
| PLAT882_ALERT_1_G No Datum for _diffrn_reflms_av_unetI/netI .....  | Please Do !  |
| PLAT883_ALERT_1_G Absent Datum for _atom_sites_solution_primary .. | Please Do !  |

- 
- 1 **ALERT level A** = Most likely a serious problem - resolve or explain
  - 20 **ALERT level B** = A potentially serious problem, consider carefully
  - 45 **ALERT level C** = Check. Ensure it is not caused by an omission or oversight
  - 8 **ALERT level G** = General information/check it is not something unexpected
- 
- 40 ALERT type 1 CIF construction/syntax error, inconsistent or missing data
  - 17 ALERT type 2 Indicator that the structure model may be wrong or deficient
  - 4 ALERT type 3 Indicator that the structure quality may be low
  - 11 ALERT type 4 Improvement, methodology, query or suggestion
  - 2 ALERT type 5 Informative message, check
-

It is advisable to attempt to resolve as many as possible of the alerts in all categories. Often the minor alerts point to easily fixed oversights, errors and omissions in your CIF or refinement strategy, so attention to these fine details can be worthwhile. In order to resolve some of the more serious problems it may be necessary to carry out additional measurements or structure refinements. However, the purpose of your study may justify the reported deviations and the more serious of these should normally be commented upon in the discussion or experimental section of a paper or in the "special\_details" fields of the CIF. checkCIF was carefully designed to identify outliers and unusual parameters, but every test has its limitations and alerts that are not important in a particular case may appear. Conversely, the absence of alerts does not guarantee there are no aspects of the results needing attention. It is up to the individual to critically assess their own results and, if necessary, seek expert advice.

### **Publication of your CIF in IUCr journals**

A basic structural check has been run on your CIF. These basic checks will be run on all CIFs submitted for publication in IUCr journals (*Acta Crystallographica*, *Journal of Applied Crystallography*, *Journal of Synchrotron Radiation*); however, if you intend to submit to *Acta Crystallographica Section C* or *E* or *IUCrData*, you should make sure that full publication checks are run on the final version of your CIF prior to submission.

### **Publication of your CIF in other journals**

Please refer to the *Notes for Authors* of the relevant journal for any special instructions relating to CIF submission.

### **Validation response form**

Please find below a validation response form (VRF) that can be filled in and pasted into your CIF.

```
# start Validation Reply Form
_vrf_DIFMN02__143527_1
;
PROBLEM: The minimum difference density is < -0.1*ZMAX*1.00
RESPONSE: ...
;
_vrf_REFLT02__143527_1
;
PROBLEM: The number of reflections greater than the sigma threshold
RESPONSE: ...
;
_vrf_DIFMN03__143527_1
;
PROBLEM: The minimum difference density is < -0.1*ZMAX*0.75
RESPONSE: ...
;
_vrf_DIFMX02__143527_1
;
PROBLEM: The maximum difference density is > 0.1*ZMAX*0.75
RESPONSE: ...
;
_vrf_PLAT098__143527_1
```

```

;
PROBLEM: Large Reported Min. (Negative) Residual Density -3.40 eA-3
RESPONSE: ...
;
_vrf_PLAT213__143527_1
;
PROBLEM: Atom C22 has ADP max/min Ratio ..... 4.6 prolat
RESPONSE: ...
;
_vrf_PLAT230__143527_1
;
PROBLEM: Hirshfeld Test Diff for S1 --O1 . 8.8 s.u.
RESPONSE: ...
;
_vrf_PLAT241__143527_1
;
PROBLEM: High 'MainMol' Ueq as Compared to Neighbors of C22 Check
RESPONSE: ...
;
_vrf_PLAT242__143527_1
;
PROBLEM: Low 'MainMol' Ueq as Compared to Neighbors of O5 Check
RESPONSE: ...
;
_vrf_PLAT360__143527_1
;
PROBLEM: Short C(sp3)-C(sp3) Bond C22 - C25 . 1.32 Ang.
RESPONSE: ...
;
_vrf_PLAT703__143527_1
;
PROBLEM: Torsion Calc -50.01(14), Rep -50.40(19), Dev.. 2.79 Sigma
RESPONSE: ...
;
_vrf_PLAT029__143527_1
;
PROBLEM: _diffn_measured_fraction_theta_full value Low . 0.962 Why?
RESPONSE: ...
;
_vrf_PLAT166__143527_1
;
PROBLEM: S.U's Given on Coordinates for Calc-flagged .... H1 Note
RESPONSE: ...
;
_vrf_PLAT220__143527_1
;
PROBLEM: NonSolvent Resd 1 C Ueq(max)/Ueq(min) Range 6.0 Ratio
RESPONSE: ...
;
_vrf_PLAT222__143527_1
;
PROBLEM: NonSolvent Resd 1 H Uiso(max)/Uiso(min) Range 10.0 Ratio
RESPONSE: ...
;
_vrf_PLAT245__143527_1
;
PROBLEM: U(iso) H4 Smaller than U(eq) C11 by 0.021 Ang**2

```

*i**i*

RESPONSE: . . .

*i**i*

RESPONSE: . . .

**i**

**Datablock\_143527\_1** - ellipsoid plot

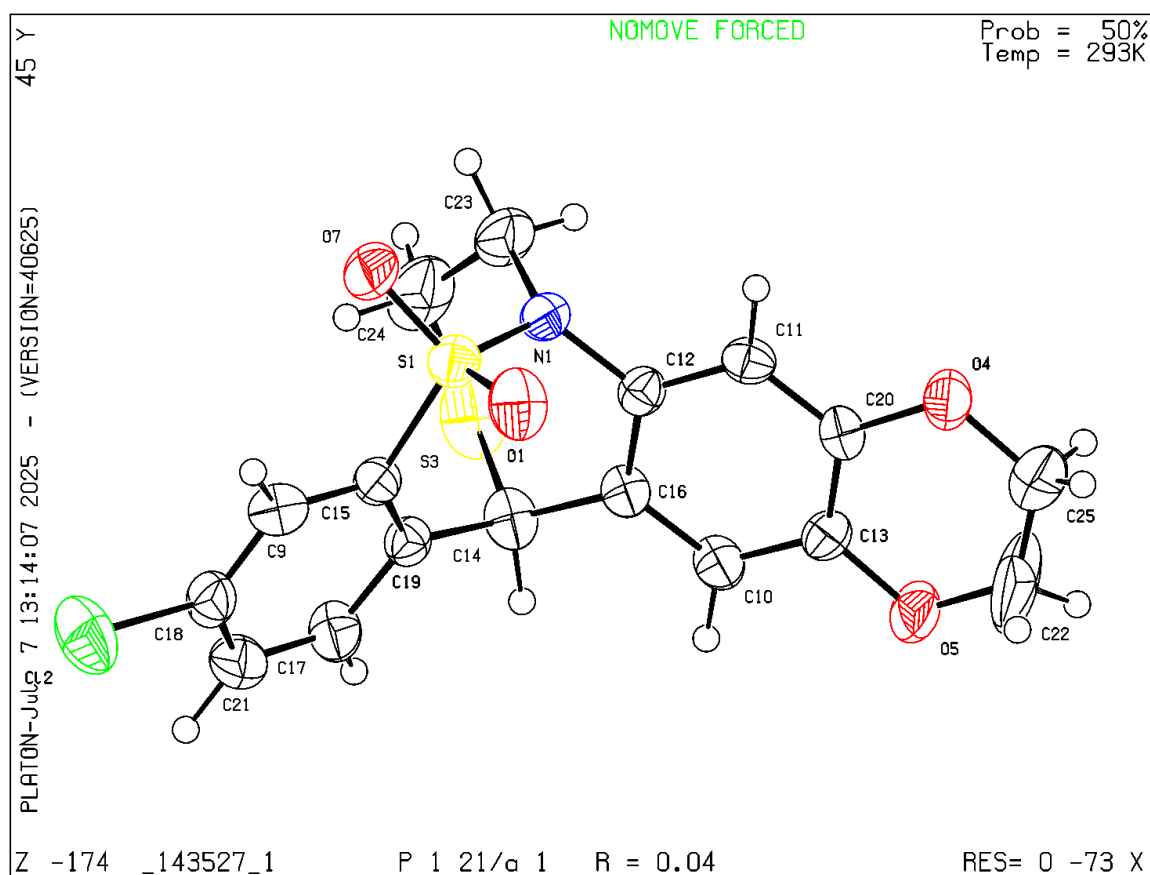

Supplement: Additional file 2 [file compound 26 checkcif.pdf › compound 26 checkcif.pdf]
