# Supplementary material for: Synthesis of new tetra- and pentacyclic, methylenedioxy- and ethylenedioxy-substituted derivatives of the dibenzo[ c , f ][1,2]thiazepine ring system
Source: publisher site journal article supplement (doi:10.3762/bjoc.21.205), 2025-12-09

You have not supplied any structure factors. As a result the full set of tests cannot be run.

No syntax errors found. CIF dictionary Interpreting this report

|                 |                |                    |              |  |
|-----------------|----------------|--------------------|--------------|--|
| Bond precision: | C-C = 0.0068 A | Wavelength=1.54187 |              |  |
| Cell:           | a=8.1686 (14)  | b=11.9644 (16)     | c=17.018 (2) |  |
|                 | alpha=90       | beta=90            | gamma=90     |  |
| Temperature:    | 293 K          |                    |              |  |

```
Correction method= # Reported T Limits: Tmin=0.342 Tmax=0.709
AbsCorr = MULTI-SCAN
```

```
R(reflections)= 0.0826( 9804)      wR2(reflections)=
S = 1.202                        0.1158( 9893)
Npar= 242
```

---

The following ALERTS were generated. Each ALERT has the format

**test-name\_ALERT\_alert-type\_alert-level.**

Click on the hyperlinks for more details of the test.

---

### Alert level A

DIFMN02\_ALERT\_2\_A The minimum difference density is > 0.0

**Author Response: Although the residual density is out of border but there is no doubt about the chemical structure taking into account other evidences, e.g. NMR. The error maybe due to crystal imperfections.**

PLAT099\_ALERT\_1\_A Minimum (Negative) Residual Density .GE. 0 !!... 1.83 eA-3

**Author Response: Although the residual density is out of border but there is no doubt about the chemical structure taking into account other evidences, e.g. NMR. The error maybe due to crystal imperfections.**

---

### Alert level B

REFLT02\_ALERT\_1\_B The number of reflections greater than the sigma threshold cannot exceed the number of symmetry-independent reflections  
Number of symmetry-independent reflections = 3162  
Number of reflections greater than sigma threshold = 9804

|                   |                                                 |           |             |
|-------------------|-------------------------------------------------|-----------|-------------|
| PLAT035_ALERT_1_B | _chemical_absolute_configuration Info           | Not Given | Please Do ! |
| PLAT097_ALERT_2_B | Large Reported Max. (Positive) Residual Density | 1.83 eA-3 |             |
| PLAT230_ALERT_2_B | Hirshfeld Test Diff for S1                      | --O4      | 12.5 s.u.   |
| PLAT703_ALERT_1_B | Torsion Calc 83.0(3), Rep 82.1(6), Dev..        |           | 3.00 Sigma  |
|                   | O(4)-S(1)-C(22-C(12 1_555 1_555 1_555 1_555     | #         | 4 Check     |
| PLAT703_ALERT_1_B | Torsion Calc -162.2(3), Rep -163.0(5), Dev..    |           | 2.67 Sigma  |
|                   | N(1)-S(1)-C(22-C(12 1_555 1_555 1_555 1_555     | #         | 10 Check    |
| PLAT703_ALERT_1_B | Torsion Calc -73.3(3), Rep -74.0(6), Dev..      |           | 2.33 Sigma  |
|                   | C(22-S(1)-N(1)-C(10 1_555 1_555 1_555 1_555     | #         | 11 Check    |
| PLAT703_ALERT_1_B | Torsion Calc 172.0(4), Rep 173.0(7), Dev..      |           | 2.50 Sigma  |
|                   | C(14-C(11-C(22-C(12 1_555 1_555 1_555 1_555     | #         | 44 Check    |
| PLAT703_ALERT_1_B | Torsion Calc 179.4(4), Rep -179.6(6), Dev..     |           | 2.50 Sigma  |
|                   | C(22-C(12-C(18-CL(2 1_555 1_555 1_555 1_555     | #         | 49 Check    |

---

### Alert level C

DIFMX02\_ALERT\_1\_C The maximum difference density is > 0.1\*ZMAX\*0.75

The relevant atom site should be identified.

RINTA01\_ALERT\_3\_C The value of Rint is greater than 0.12

Rint given 0.171

|                   |                                                  |              |
|-------------------|--------------------------------------------------|--------------|
| PLAT020_ALERT_3_C | The Value of Rint is Greater Than 0.12 .....     | 0.171 Report |
| PLAT034_ALERT_1_C | No Flack Parameter Given. Z > Si, NonCentro .... | Please Do !  |
| PLAT234_ALERT_4_C | Large Hirshfeld Difference C20 --C25             | 0.16 Ang.    |
| PLAT241_ALERT_2_C | High 'MainMol' Ueq as Compared to Neighbors of   | C25 Check    |
| PLAT340_ALERT_3_C | Low Bond Precision on C-C Bonds .....            | 0.0068 Ang.  |
| PLAT360_ALERT_2_C | Short C(sp3)-C(sp3) Bond C20 - C25               | 1.37 Ang.    |
| PLAT703_ALERT_1_C | Torsion Calc -88.8(4), Rep -88.3(7), Dev..       | 1.25 Sigma   |

|                                |                |       |                  |       |   |            |
|--------------------------------|----------------|-------|------------------|-------|---|------------|
| O(4)-S(1)-C(22-C(11            | 1_555          | 1_555 | 1_555            | 1_555 | # | 3 Check    |
| PLAT703_ALERT_1_C Torsion Calc | 169.6(3), Rep  |       | 169.1(5), Dev..  |       |   | 1.67 Sigma |
| O(5)-S(1)-N(1)-C(10            | 1_555          | 1_555 | 1_555            | 1_555 | # | 5 Check    |
| PLAT703_ALERT_1_C Torsion Calc | 142.9(4), Rep  |       | 143.6(7), Dev..  |       |   | 1.75 Sigma |
| O(5)-S(1)-C(22-C(11            | 1_555          | 1_555 | 1_555            | 1_555 | # | 7 Check    |
| PLAT703_ALERT_1_C Torsion Calc | -45.4(4), Rep  |       | -46.1(6), Dev..  |       |   | 1.75 Sigma |
| O(5)-S(1)-C(22-C(12            | 1_555          | 1_555 | 1_555            | 1_555 | # | 8 Check    |
| PLAT703_ALERT_1_C Torsion Calc | 26.1(4), Rep   |       | 26.7(8), Dev..   |       |   | 1.50 Sigma |
| N(1)-S(1)-C(22-C(11            | 1_555          | 1_555 | 1_555            | 1_555 | # | 9 Check    |
| PLAT703_ALERT_1_C Torsion Calc | -170.3(3), Rep |       | -169.8(6), Dev.. |       |   | 1.67 Sigma |
| C(23-O(3)-C(14-C(11            | 1_555          | 1_555 | 1_555            | 1_555 | # | 14 Check   |
| PLAT703_ALERT_1_C Torsion Calc | -94.1(5), Rep  |       | -94.7(8), Dev..  |       |   | 1.20 Sigma |
| C(24-N(1)-C(10-C(1)            | 1_555          | 1_555 | 1_555            | 1_555 | # | 23 Check   |
| PLAT703_ALERT_1_C Torsion Calc | -174.3(4), Rep |       | -174.9(7), Dev.. |       |   | 1.50 Sigma |
| C(14-C(11-C(13-C(16            | 1_555          | 1_555 | 1_555            | 1_555 | # | 39 Check   |
| PLAT703_ALERT_1_C Torsion Calc | 169.7(3), Rep  |       | 169.3(6), Dev..  |       |   | 1.33 Sigma |
| C(13-C(11-C(22-S(1)            | 1_555          | 1_555 | 1_555            | 1_555 | # | 40 Check   |
| PLAT703_ALERT_1_C Torsion Calc | -1.5(6), Rep   |       | -0.3(10), Dev..  |       |   | 2.00 Sigma |
| C(13-C(11-C(22-C(12            | 1_555          | 1_555 | 1_555            | 1_555 | # | 41 Check   |
| PLAT703_ALERT_1_C Torsion Calc | -0.2(7), Rep   |       | -1.0(12), Dev..  |       |   | 1.14 Sigma |
| C(22-C(11-C(13-C(16            | 1_555          | 1_555 | 1_555            | 1_555 | # | 42 Check   |
| PLAT703_ALERT_1_C Torsion Calc | 1.9(7), Rep    |       | 0.5(11), Dev..   |       |   | 2.00 Sigma |
| C(18-C(12-C(22-C(11            | 1_555          | 1_555 | 1_555            | 1_555 | # | 48 Check   |
| PLAT703_ALERT_1_C Torsion Calc | -0.6(8), Rep   |       | 0.7(12), Dev..   |       |   | 1.62 Sigma |
| C(22-C(12-C(18-C(16            | 1_555          | 1_555 | 1_555            | 1_555 | # | 50 Check   |
| PLAT703_ALERT_1_C Torsion Calc | 178.9(4), Rep  |       | 178.3(7), Dev..  |       |   | 1.50 Sigma |
| C(13-C(16-C(18-CL(2            | 1_555          | 1_555 | 1_555            | 1_555 | # | 54 Check   |
| PLAT703_ALERT_1_C Torsion Calc | -1.1(8), Rep   |       | -2.0(14), Dev..  |       |   | 1.12 Sigma |
| C(13-C(16-C(18-C(12            | 1_555          | 1_555 | 1_555            | 1_555 | # | 55 Check   |

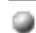

#### Alert level G

|                                                                    |              |
|--------------------------------------------------------------------|--------------|
| PLAT005_ALERT_5_G No Embedded Refinement Details Found in the CIF  | Please Do !  |
| PLAT199_ALERT_1_G Reported _cell_measurement_temperature ..... (K) | 293 Check    |
| PLAT200_ALERT_1_G Reported _diffrn_ambient_temperature ..... (K)   | 293 Check    |
| PLAT791_ALERT_4_G Model has Chirality at C14 (Sohncke SpGr)        | S Verify     |
| PLAT808_ALERT_5_G No Parseable SHELXL Style Weighting Scheme Found | Please Check |
| PLAT882_ALERT_1_G No Datum for _diffrn_reflns_av_unetI/netI .....  | Please Do !  |
| PLAT883_ALERT_1_G Absent Datum for _atom_sites_solution_primary .. | Please Do !  |

- 
- 2 **ALERT level A** = Most likely a serious problem - resolve or explain
- 9 **ALERT level B** = A potentially serious problem, consider carefully
- 23 **ALERT level C** = Check. Ensure it is not caused by an omission or oversight
- 7 **ALERT level G** = General information/check it is not something unexpected
- 
- 29 ALERT type 1 CIF construction/syntax error, inconsistent or missing data
- 5 ALERT type 2 Indicator that the structure model may be wrong or deficient
- 3 ALERT type 3 Indicator that the structure quality may be low
- 2 ALERT type 4 Improvement, methodology, query or suggestion
- 2 ALERT type 5 Informative message, check
-

It is advisable to attempt to resolve as many as possible of the alerts in all categories. Often the minor alerts point to easily fixed oversights, errors and omissions in your CIF or refinement strategy, so attention to these fine details can be worthwhile. In order to resolve some of the more serious problems it may be necessary to carry out additional measurements or structure refinements. However, the purpose of your study may justify the reported deviations and the more serious of these should normally be commented upon in the discussion or experimental section of a paper or in the "special\_details" fields of the CIF. checkCIF was carefully designed to identify outliers and unusual parameters, but every test has its limitations and alerts that are not important in a particular case may appear. Conversely, the absence of alerts does not guarantee there are no aspects of the results needing attention. It is up to the individual to critically assess their own results and, if necessary, seek expert advice.

### Publication of your CIF in IUCr journals

A basic structural check has been run on your CIF. These basic checks will be run on all CIFs submitted for publication in IUCr journals (*Acta Crystallographica*, *Journal of Applied Crystallography*, *Journal of Synchrotron Radiation*); however, if you intend to submit to *Acta Crystallographica Section C* or *E* or *IUCrData*, you should make sure that full publication checks are run on the final version of your CIF prior to submission.

### Publication of your CIF in other journals

Please refer to the *Notes for Authors* of the relevant journal for any special instructions relating to CIF submission.

### Validation response form

Please find below a validation response form (VRF) that can be filled in and pasted into your CIF.

```
# start Validation Reply Form
_vrf_REFLT02__143758_1
;
PROBLEM: The number of reflections greater than the sigma threshold
RESPONSE: ...
;
_vrf_DIFMX02__143758_1
;
PROBLEM: The maximum difference density is > 0.1*ZMAX*0.75
RESPONSE: ...
;
_vrf_RINTA01__143758_1
;
PROBLEM: The value of Rint is greater than 0.12
RESPONSE: ...
;
_vrf_PLAT035__143758_1
;
PROBLEM: _chemical_absolute_configuration Info Not Given Please Do !
RESPONSE: ...
;
_vrf_PLAT097__143758_1
```

```

;
PROBLEM: Large Reported Max. (Positive) Residual Density      1.83 eA-3
RESPONSE: ...
;
_vrf_PLAT230__143758_1
;
PROBLEM: Hirshfeld Test Diff for      S1      --O4      .      12.5 s.u.
RESPONSE: ...
;
_vrf_PLAT703__143758_1
;
PROBLEM: Torsion Calc      83.0(3), Rep      82.1(6), Dev..      3.00 Sigma
RESPONSE: ...
;
_vrf_PLAT020__143758_1
;
PROBLEM: The Value of Rint is Greater Than 0.12 .....      0.171 Report
RESPONSE: ...
;
_vrf_PLAT034__143758_1
;
PROBLEM: No Flack Parameter Given. Z > Si, NonCentro ....      Please Do !
RESPONSE: ...
;
_vrf_PLAT234__143758_1
;
PROBLEM: Large Hirshfeld Difference C20      --C25      .      0.16 Ang.
RESPONSE: ...
;
_vrf_PLAT241__143758_1
;
PROBLEM: High 'MainMol' Ueq as Compared to Neighbors of      C25 Check
RESPONSE: ...
;
_vrf_PLAT340__143758_1
;
PROBLEM: Low Bond Precision on C-C Bonds .....      0.0068 Ang.
RESPONSE: ...
;
_vrf_PLAT360__143758_1
;
PROBLEM: Short C(sp3)-C(sp3) Bond C20      - C25      .      1.37 Ang.
RESPONSE: ...
;
# end Validation Reply Form

```

---

**PLATON version of 04/06/2025; check.def file version of 30/05/2025**

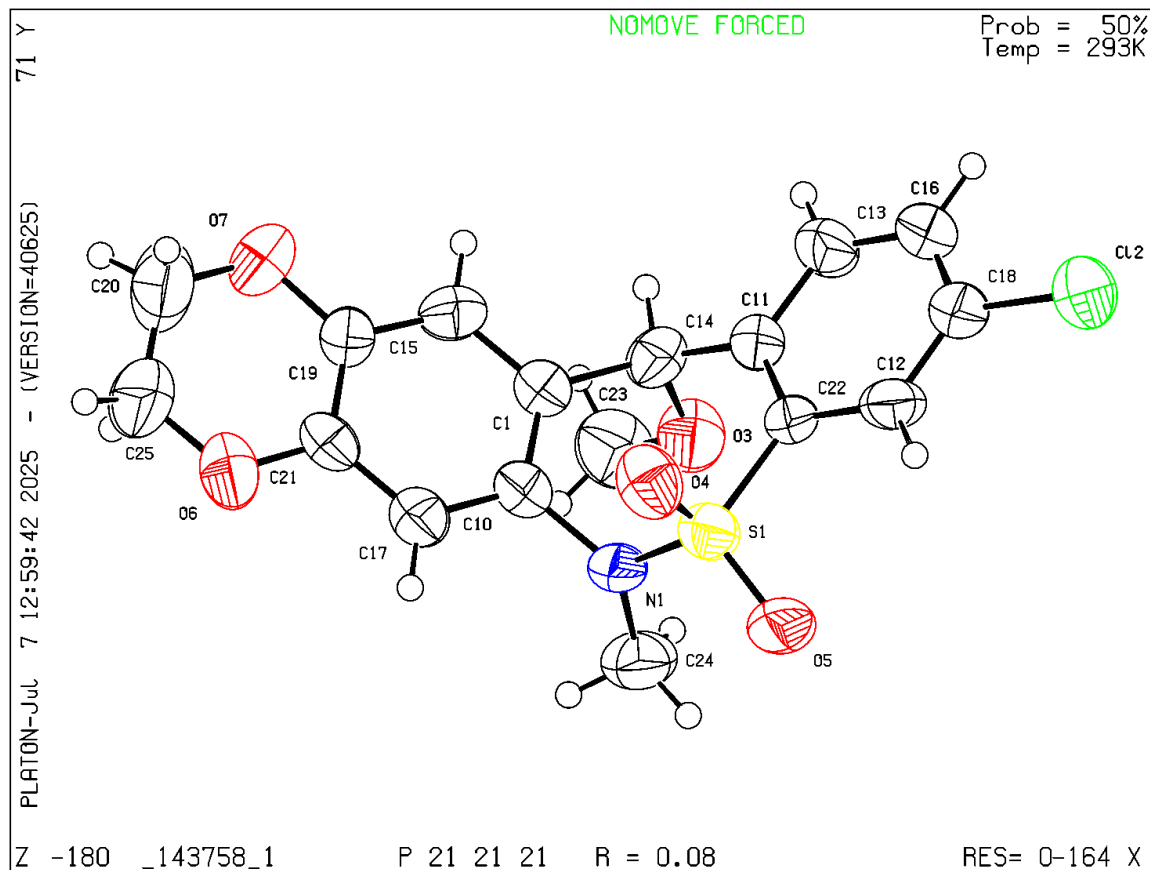

Supplement: Additional file 2 [file compound 23a checkcif.pdf › compound 23a checkcif.pdf]
