# Supplementary material for: Synthesis of new tetra- and pentacyclic, methylenedioxy- and ethylenedioxy-substituted derivatives of the dibenzo[ c , f ][1,2]thiazepine ring system
Source: publisher site journal article supplement (doi:10.3762/bjoc.21.205), 2025-12-09

You have not supplied any structure factors. As a result the full set of tests cannot be run.

No syntax errors found. CIF dictionary Interpreting this report

|                 |                |                    |              |
|-----------------|----------------|--------------------|--------------|
| Bond precision: | C-C = 0.0059 Å | Wavelength=1.54187 |              |
| Cell:           | a=10.3705(8)   | b=37.377(3)        | c=10.6257(8) |
|                 | alpha=90       | beta=104.647(3)    | gamma=90     |
| Temperature:    | 293 K          |                    |              |

```
Correction method= # Reported T Limits: Tmin=0.706 Tmax=0.884
AbsCorr = MULTI-SCAN
```

```
R(reflections)= 0.0767( 20535)      wR2(reflections)=
S = 1.074                          0.1030( 20815)
Npar= 547
```

---

The following ALERTS were generated. Each ALERT has the format

**test-name\_ALERT\_alert-type\_alert-level.**

Click on the hyperlinks for more details of the test.

---

### Alert level A

DIFMN02\_ALERT\_2\_A The minimum difference density is < -0.1\*ZMAX\*2.00  
\_refine\_diff\_density\_min given = -12.600  
Test value = -3.400

**Author Response: Although the residual density is out of border but there is no doubt about the chemical structure taking into account other evidences, e.g. NMR. The error maybe due to crystal imperfections.**

PLAT097\_ALERT\_2\_A Large Reported Max. (Positive) Residual Density 5.03 eA-3

**Author Response: Although the residual density is out of border but there is no doubt about the chemical structure taking into account other evidences, e.g. NMR. The error maybe due to crystal imperfections.**

PLAT098\_ALERT\_2\_A Large Reported Min. (Negative) Residual Density -12.60 eA-3

**Author Response: Although the residual density is out of border but there is no doubt about the chemical structure taking into account other evidences, e.g. NMR. The error maybe due to crystal imperfections.**

PLAT703\_ALERT\_1\_A Torsion Calc 60.6(3), Rep 59.5(5), Dev.. 3.67 Sigma  
C(39-N(2)-C(45-C(3) 1\_555 1\_555 1\_555 1\_555 # 46 Check

**Author Response: The structure is affected by some strain. Crystal imperfections can not be excluded either.**

---

### Alert level B

REFLT02\_ALERT\_1\_B The number of reflections greater than the sigma threshold  
cannot exceed the number of symmetry-independent reflections  
Number of symmetry-independent reflections = 7615  
Number of reflections greater than sigma threshold = 20535

|                   |                                                |     |       |   |           |
|-------------------|------------------------------------------------|-----|-------|---|-----------|
| PLAT230_ALERT_2_B | Hirshfeld Test Diff for                        | Cl1 | --C29 | . | 8.3 s.u.  |
| PLAT230_ALERT_2_B | Hirshfeld Test Diff for                        | N13 | --C28 | . | 8.3 s.u.  |
| PLAT230_ALERT_2_B | Hirshfeld Test Diff for                        | S1  | --O6  | . | 7.5 s.u.  |
| PLAT230_ALERT_2_B | Hirshfeld Test Diff for                        | O9  | --C41 | . | 7.2 s.u.  |
| PLAT230_ALERT_2_B | Hirshfeld Test Diff for                        | O9  | --C54 | . | 7.8 s.u.  |
| PLAT230_ALERT_2_B | Hirshfeld Test Diff for                        | C22 | --C33 | . | 7.7 s.u.  |
| PLAT241_ALERT_2_B | High 'MainMol' Ueq as Compared to Neighbors of |     |       |   | C49 Check |
| PLAT241_ALERT_2_B | High 'MainMol' Ueq as Compared to Neighbors of |     |       |   | C55 Check |
| PLAT360_ALERT_2_B | Short C(sp3)-C(sp3) Bond                       | C49 | - C56 | . | 1.30 Ang. |
| PLAT360_ALERT_2_B | Short C(sp3)-C(sp3) Bond                       | C54 | - C55 | . | 1.30 Ang. |

|                   |                           |               |                 |       |                 |
|-------------------|---------------------------|---------------|-----------------|-------|-----------------|
| PLAT410_ALERT_2_B | Short Intra H...H Contact | H23           | ..H36           | .     | 1.87 Ang.       |
|                   |                           |               | x,y,z =         | 1_555 | Check           |
| PLAT410_ALERT_2_B | Short Intra H...H Contact | H24           | ..H35           | .     | 1.87 Ang.       |
|                   |                           |               | x,y,z =         | 1_555 | Check           |
| PLAT410_ALERT_2_B | Short Intra H...H Contact | H31           | ..H34           | .     | 1.88 Ang.       |
|                   |                           |               | x,y,z =         | 1_555 | Check           |
| PLAT410_ALERT_2_B | Short Intra H...H Contact | H32           | ..H33           | .     | 1.89 Ang.       |
|                   |                           |               | x,y,z =         | 1_555 | Check           |
| PLAT703_ALERT_1_B | Torsion Calc              | 178.5(2), Rep | 177.9(3), Dev.. |       | 3.00 Sigma      |
|                   | O(6)-S(1)-N(1)-C(24)      | 1_555         | 1_555           | 1_555 | 1_555 # 1 Check |

**Author Response: The structure is affected by some strain. Crystal imperfections can not be excluded either.**

|                   |                         |               |                 |       |                  |
|-------------------|-------------------------|---------------|-----------------|-------|------------------|
| PLAT703_ALERT_1_B | Torsion Calc            | 178.8(4), Rep | 179.8(5), Dev.. |       | 2.50 Sigma       |
|                   | C(49)-O(12)-C(43)-C(30) | 1_555         | 1_555           | 1_555 | 1_555 # 35 Check |

**Author Response: The structure is affected by some strain. Crystal imperfections can not be excluded either.**

|                   |                        |               |                 |       |                  |
|-------------------|------------------------|---------------|-----------------|-------|------------------|
| PLAT703_ALERT_1_B | Torsion Calc           | -54.1(3), Rep | -53.2(5), Dev.. |       | 3.00 Sigma       |
|                   | C(34)-N(2)-C(45)-C(20) | 1_555         | 1_555           | 1_555 | 1_555 # 44 Check |

**Author Response: The structure is affected by some strain. Crystal imperfections can not be excluded either.**

|                   |                       |                |                  |       |                  |
|-------------------|-----------------------|----------------|------------------|-------|------------------|
| PLAT703_ALERT_1_B | Torsion Calc          | -179.1(3), Rep | -178.4(5), Dev.. |       | 2.33 Sigma       |
|                   | C(32)-C(2)-C(24)-N(1) | 1_555          | 1_555            | 1_555 | 1_555 # 73 Check |

**Author Response: The structure is affected by some strain. Crystal imperfections can not be excluded either.**

|                   |                       |               |                 |       |                  |
|-------------------|-----------------------|---------------|-----------------|-------|------------------|
| PLAT703_ALERT_1_B | Torsion Calc          | -99.9(4), Rep | -99.0(5), Dev.. |       | 2.25 Sigma       |
|                   | C(26)-C(3)-C(45)-N(2) | 1_555         | 1_555           | 1_555 | 1_555 # 78 Check |

**Author Response: The structure is affected by some strain. Crystal imperfections can not be excluded either.**

|                   |                        |               |                 |       |                  |
|-------------------|------------------------|---------------|-----------------|-------|------------------|
| PLAT703_ALERT_1_B | Torsion Calc           | -49.6(5), Rep | -50.7(7), Dev.. |       | 2.20 Sigma       |
|                   | C(38)-C(3)-C(45)-C(20) | 1_555         | 1_555           | 1_555 | 1_555 # 82 Check |

**Author Response: The structure is affected by some strain. Crystal imperfections can not be excluded either.**

---

**Alert level C**

DIFMN03\_ALERT\_1\_C The minimum difference density is < -0.1\*ZMAX\*0.75  
The relevant atom site should be identified.

DIFMX02\_ALERT\_1\_C The maximum difference density is > 0.1\*ZMAX\*0.75  
The relevant atom site should be identified.

PLAT029\_ALERT\_3\_C \_diffn\_measured\_fraction\_theta\_full value Low . 0.977 Why?

PLAT213\_ALERT\_2\_C Atom C49 has ADP max/min Ratio ..... 3.9 prolat

PLAT213\_ALERT\_2\_C Atom C55 has ADP max/min Ratio ..... 3.5 prolat

PLAT220\_ALERT\_2\_C NonSolvent Resd 1 C Ueq(max)/Ueq(min) Range 5.4 Ratio

PLAT220\_ALERT\_2\_C NonSolvent Resd 2 C Ueq(max)/Ueq(min) Range 4.2 Ratio

PLAT222\_ALERT\_3\_C NonSolvent Resd 1 H Uiso(max)/Uiso(min) Range 4.6 Ratio

PLAT230\_ALERT\_2\_C Hirshfeld Test Diff for S2 --O7 . 5.7 s.u.

PLAT230\_ALERT\_2\_C Hirshfeld Test Diff for S2 --N13 . 7.0 s.u.

PLAT230\_ALERT\_2\_C Hirshfeld Test Diff for S2 --C38 . 5.5 s.u.

PLAT230\_ALERT\_2\_C Hirshfeld Test Diff for N2 --C34 . 6.0 s.u.

PLAT230\_ALERT\_2\_C Hirshfeld Test Diff for C20 --C28 . 5.5 s.u.

PLAT230\_ALERT\_2\_C Hirshfeld Test Diff for C20 --C45 . 7.0 s.u.

PLAT230\_ALERT\_2\_C Hirshfeld Test Diff for C21 --C38 . 6.0 s.u.

PLAT230\_ALERT\_2\_C Hirshfeld Test Diff for C28 --C37 . 6.2 s.u.

PLAT230\_ALERT\_2\_C Hirshfeld Test Diff for C30 --C43 . 5.5 s.u.

PLAT230\_ALERT\_2\_C Hirshfeld Test Diff for C34 --C46 . 5.2 s.u.

PLAT230\_ALERT\_2\_C Hirshfeld Test Diff for C42 --C43 . 5.8 s.u.

PLAT230\_ALERT\_2\_C Hirshfeld Test Diff for O8 --C55 . 5.1 s.u.

PLAT230\_ALERT\_2\_C Hirshfeld Test Diff for N1 --C24 . 6.7 s.u.

PLAT230\_ALERT\_2\_C Hirshfeld Test Diff for N3 --C35 . 5.7 s.u.

PLAT230\_ALERT\_2\_C Hirshfeld Test Diff for C32 --C41 . 5.2 s.u.

PLAT234\_ALERT\_4\_C Large Hirshfeld Difference O1 --C56 . 0.16 Ang.

PLAT234\_ALERT\_4\_C Large Hirshfeld Difference C49 --C56 . 0.18 Ang.

PLAT234\_ALERT\_4\_C Large Hirshfeld Difference C54 --C55 . 0.16 Ang.

PLAT241\_ALERT\_2\_C High 'MainMol' Ueq as Compared to Neighbors of C44 Check

PLAT241\_ALERT\_2\_C High 'MainMol' Ueq as Compared to Neighbors of C53 Check

PLAT242\_ALERT\_2\_C Low 'MainMol' Ueq as Compared to Neighbors of O1 Check

PLAT242\_ALERT\_2\_C Low 'MainMol' Ueq as Compared to Neighbors of O12 Check

PLAT242\_ALERT\_2\_C Low 'MainMol' Ueq as Compared to Neighbors of N2 Check

PLAT242\_ALERT\_2\_C Low 'MainMol' Ueq as Compared to Neighbors of O8 Check

PLAT242\_ALERT\_2\_C Low 'MainMol' Ueq as Compared to Neighbors of N3 Check

PLAT340\_ALERT\_3\_C Low Bond Precision on C-C Bonds ..... 0.00594 Ang.

PLAT601\_ALERT\_2\_C Unit Cell Contains Solvent Accessible VOIDS <= 51 Ang\*\*3

PLAT703\_ALERT\_1\_C Torsion Calc -51.8(3), Rep -52.4(4), Dev.. 2.00 Sigma

O(10)-S(1)-N(1)-C(24) 1\_555 1\_555 1\_555 1\_555 # 5 Check

**Author Response: The structure is affected by some strain. Crystal imperfections can not be excluded either.**

PLAT703\_ALERT\_1\_C Torsion Calc 61.3(3), Rep 60.7(4), Dev.. 2.00 Sigma

C(25)-S(1)-N(1)-C(24) 1\_555 1\_555 1\_555 1\_555 # 11 Check

**Author Response: The structure is affected by some strain. Crystal imperfections can not be excluded either.**

PLAT703\_ALERT\_1\_C Torsion Calc 142.9(2), Rep 142.5(3), Dev.. 2.00 Sigma  
O(5)-S(2)-N(13-C(31) 1\_555 1\_555 1\_555 1\_555 # 14 Check

**Author Response: The structure is affected by some strain. Crystal imperfections can not be excluded either.**

PLAT703\_ALERT\_1\_C Torsion Calc 98.4(3), Rep 97.9(5), Dev.. 1.67 Sigma  
O(5)-S(2)-C(38-C(3) 1\_555 1\_555 1\_555 1\_555 # 15 Check

**Author Response: The structure is affected by some strain. Crystal imperfections can not be excluded either.**

PLAT703\_ALERT\_1\_C Torsion Calc -76.2(3), Rep -75.6(4), Dev.. 2.00 Sigma  
O(5)-S(2)-C(38-C(21) 1\_555 1\_555 1\_555 1\_555 # 16 Check

**Author Response: The structure is affected by some strain. Crystal imperfections can not be excluded either.**

PLAT703\_ALERT\_1\_C Torsion Calc -133.9(3), Rep -134.5(5), Dev.. 2.00 Sigma  
O(7)-S(2)-C(38-C(3) 1\_555 1\_555 1\_555 1\_555 # 19 Check

**Author Response: The structure is affected by some strain. Crystal imperfections can not be excluded either.**

PLAT703\_ALERT\_1\_C Torsion Calc 51.5(3), Rep 52.0(5), Dev.. 1.67 Sigma  
O(7)-S(2)-C(38-C(21) 1\_555 1\_555 1\_555 1\_555 # 20 Check

**Author Response: The structure is affected by some strain. Crystal imperfections can not be excluded either.**

PLAT703\_ALERT\_1\_C Torsion Calc -17.8(4), Rep -18.5(6), Dev.. 1.75 Sigma  
N(13-S(2)-C(38-C(3) 1\_555 1\_555 1\_555 1\_555 # 21 Check

**Author Response: The structure is affected by some strain. Crystal imperfections can not be excluded either.**

PLAT703\_ALERT\_1\_C Torsion Calc 167.6(2), Rep 168.0(4), Dev.. 2.00 Sigma  
N(13-S(2)-C(38-C(21) 1\_555 1\_555 1\_555 1\_555 # 22 Check

**Author Response: The structure is affected by some strain. Crystal imperfections can not be excluded either.**

PLAT703\_ALERT\_1\_C Torsion Calc 67.2(3), Rep 67.6(4), Dev.. 1.33 Sigma  
C(38-S(2)-N(13-C(28) 1\_555 1\_555 1\_555 1\_555 # 23 Check

**Author Response: The structure is affected by some strain. Crystal imperfections can not be excluded either.**

PLAT703\_ALERT\_1\_C Torsion Calc 12.0(8), Rep 11.1(12), Dev.. 1.12 Sigma  
C(32-O(8)-C(55-C(54 1\_555 1\_555 1\_555 1\_555 # 28 Check

**Author Response: The structure is affected by some strain. Crystal imperfections can not be excluded either.**

PLAT703\_ALERT\_1\_C Torsion Calc 172.7(4), Rep 173.4(6), Dev.. 1.75 Sigma  
C(54-O(9)-C(41-C(36 1\_555 1\_555 1\_555 1\_555 # 33 Check

**Author Response: The structure is affected by some strain. Crystal imperfections can not be excluded either.**

PLAT703\_ALERT\_1\_C Torsion Calc -75.3(4), Rep -74.7(6), Dev.. 1.50 Sigma  
S(1)-N(1)-C(24-C(22 1\_555 1\_555 1\_555 1\_555 # 38 Check

**Author Response: The structure is affected by some strain. Crystal imperfections can not be excluded either.**

PLAT703\_ALERT\_1\_C Torsion Calc -83.8(4), Rep -84.3(6), Dev.. 1.25 Sigma  
C(51-N(1)-C(24-C(2) 1\_555 1\_555 1\_555 1\_555 # 39 Check

**Author Response: The structure is affected by some strain. Crystal imperfections can not be excluded either.**

PLAT703\_ALERT\_1\_C Torsion Calc -44.5(3), Rep -44.1(5), Dev.. 1.33 Sigma  
C(39-N(2)-C(34-C(46 1\_555 1\_555 1\_555 1\_555 # 42 Check

**Author Response: The structure is affected by some strain. Crystal imperfections can not be excluded either.**

PLAT703\_ALERT\_1\_C Torsion Calc -166.9(3), Rep -167.4(4), Dev.. 1.67 Sigma  
C(45-N(2)-C(34-C(46 1\_555 1\_555 1\_555 1\_555 # 45 Check

**Author Response: The structure is affected by some strain. Crystal imperfections can not be excluded either.**

PLAT703\_ALERT\_1\_C Torsion Calc 174.9(3), Rep 174.5(4), Dev.. 1.33 Sigma  
C(35-N(3)-C(33-C(1) 1\_555 1\_555 1\_555 1\_555 # 50 Check

**Author Response: The structure is affected by some strain. Crystal imperfections can not be excluded either.**

PLAT703\_ALERT\_1\_C Torsion Calc    -56.8(4), Rep    -57.3(6), Dev..    1.25 Sigma  
C(35-N(3)-C(33-C(22    1\_555    1\_555    1\_555    1\_555    #    51 Check

**Author Response: The structure is affected by some strain. Crystal imperfections can not be excluded either.**

PLAT703\_ALERT\_1\_C Torsion Calc    -174.8(3), Rep    -175.2(5), Dev..    1.33 Sigma  
C(52-N(3)-C(33-C(22    1\_555    1\_555    1\_555    1\_555    #    54 Check

**Author Response: The structure is affected by some strain. Crystal imperfections can not be excluded either.**

PLAT703\_ALERT\_1\_C Torsion Calc    -179.8(3), Rep    -179.4(4), Dev..    1.33 Sigma  
C(33-C(1)-C(25-C(27    1\_555    1\_555    1\_555    1\_555    #    64 Check

**Author Response: The structure is affected by some strain. Crystal imperfections can not be excluded either.**

PLAT703\_ALERT\_1\_C Torsion Calc    -174.0(3), Rep    -173.5(4), Dev..    1.67 Sigma  
C(26-C(3)-C(38-S(2)    1\_555    1\_555    1\_555    1\_555    #    75 Check

**Author Response: The structure is affected by some strain. Crystal imperfections can not be excluded either.**

PLAT703\_ALERT\_1\_C Torsion Calc    0.1(5), Rep    -0.6(8), Dev..    1.40 Sigma  
C(26-C(3)-C(38-C(21    1\_555    1\_555    1\_555    1\_555    #    76 Check

**Author Response: The structure is affected by some strain. Crystal imperfections can not be excluded either.**

PLAT703\_ALERT\_1\_C Torsion Calc    134.8(3), Rep    134.4(5), Dev..    1.33 Sigma  
C(26-C(3)-C(45-C(20    1\_555    1\_555    1\_555    1\_555    #    79 Check

**Author Response: The structure is affected by some strain. Crystal imperfections can not be excluded either.**

PLAT703\_ALERT\_1\_C Torsion Calc    175.5(3), Rep    175.0(5), Dev..    1.67 Sigma  
C(45-C(3)-C(26-C(17    1\_555    1\_555    1\_555    1\_555    #    80 Check

**Author Response: The structure is affected by some strain. Crystal imperfections can not be excluded either.**

PLAT703\_ALERT\_1\_C Torsion Calc    10.4(5), Rep    11.4(9), Dev..    2.00 Sigma  
C(45-C(3)-C(38-S(2)    1\_555    1\_555    1\_555    1\_555    #    83 Check

**Author Response: The structure is affected by some strain. Crystal imperfections can not be excluded either.**

PLAT703\_ALERT\_1\_C Torsion Calc 1.0(5), Rep 0.4(7), Dev.. 1.20 Sigma  
C(28-C(20-C(30-C(43 1\_555 1\_555 1\_555 1\_555 # 88 Check

**Author Response: The structure is affected by some strain. Crystal imperfections can not be excluded either.**

PLAT703\_ALERT\_1\_C Torsion Calc -58.3(4), Rep -58.8(5), Dev.. 1.25 Sigma  
C(28-C(20-C(45-N(2) 1\_555 1\_555 1\_555 1\_555 # 91 Check

**Author Response: The structure is affected by some strain. Crystal imperfections can not be excluded either.**

PLAT703\_ALERT\_1\_C Torsion Calc 66.7(5), Rep 67.3(6), Dev.. 1.20 Sigma  
C(28-C(20-C(45-C(3) 1\_555 1\_555 1\_555 1\_555 # 92 Check

**Author Response: The structure is affected by some strain. Crystal imperfections can not be excluded either.**

PLAT703\_ALERT\_1\_C Torsion Calc 118.5(4), Rep 117.8(5), Dev.. 1.75 Sigma  
C(30-C(20-C(45-N(2) 1\_555 1\_555 1\_555 1\_555 # 95 Check

**Author Response: The structure is affected by some strain. Crystal imperfections can not be excluded either.**

PLAT703\_ALERT\_1\_C Torsion Calc -116.6(4), Rep -116.1(5), Dev.. 1.25 Sigma  
C(30-C(20-C(45-C(3) 1\_555 1\_555 1\_555 1\_555 # 96 Check

**Author Response: The structure is affected by some strain. Crystal imperfections can not be excluded either.**

PLAT703\_ALERT\_1\_C Torsion Calc -175.9(4), Rep -176.4(5), Dev.. 1.25 Sigma  
C(45-C(20-C(30-C(43 1\_555 1\_555 1\_555 1\_555 # 97 Check

**Author Response: The structure is affected by some strain. Crystal imperfections can not be excluded either.**

PLAT703\_ALERT\_1\_C Torsion Calc 1.7(5), Rep 2.5(9), Dev.. 1.60 Sigma  
C(29-C(21-C(38-C(3) 1\_555 1\_555 1\_555 1\_555 # 99 Check

**Author Response: The structure is affected by some strain. Crystal imperfections can not be excluded either.**



PLAT703\_ALERT\_1\_C Torsion Calc 179.2(3), Rep 178.8(4), Dev.. 1.33 Sigma  
C(38-C(21-C(29-CL(1 1\_555 1\_555 1\_555 1\_555 # 100 Check

**Author Response: The structure is affected by some strain. Crystal imperfections can not be excluded either.**

PLAT703\_ALERT\_1\_C Torsion Calc 0.0(6), Rep -0.7(8), Dev.. 1.17 Sigma  
C(33-C(22-C(24-N(1 1\_555 1\_555 1\_555 1\_555 # 104 Check

**Author Response: The structure is affected by some strain. Crystal imperfections can not be excluded either.**

PLAT703\_ALERT\_1\_C Torsion Calc 1.6(6), Rep 0.6(8), Dev.. 1.67 Sigma  
C(24-C(22-C(36-C(41 1\_555 1\_555 1\_555 1\_555 # 106 Check

**Author Response: The structure is affected by some strain. Crystal imperfections can not be excluded either.**

PLAT703\_ALERT\_1\_C Torsion Calc 121.5(4), Rep 121.0(5), Dev.. 1.25 Sigma  
C(36-C(22-C(33-N(3 1\_555 1\_555 1\_555 1\_555 # 110 Check

**Author Response: The structure is affected by some strain. Crystal imperfections can not be excluded either.**

PLAT703\_ALERT\_1\_C Torsion Calc 174.8(3), Rep 174.4(4), Dev.. 1.33 Sigma  
S(1)-C(25-C(27-C(40 1\_555 1\_555 1\_555 1\_555 # 112 Check

**Author Response: The structure is affected by some strain. Crystal imperfections can not be excluded either.**

PLAT703\_ALERT\_1\_C Torsion Calc -0.3(6), Rep -1.3(7), Dev.. 1.67 Sigma  
C(1)-C(25-C(27-C(40 1\_555 1\_555 1\_555 1\_555 # 113 Check

**Author Response: The structure is affected by some strain. Crystal imperfections can not be excluded either.**

PLAT703\_ALERT\_1\_C Torsion Calc -179.0(3), Rep -178.5(4), Dev.. 1.67 Sigma  
C(25-C(27-C(40-CL(3 1\_555 1\_555 1\_555 1\_555 # 114 Check

**Author Response: The structure is affected by some strain. Crystal imperfections can not be excluded either.**

PLAT703\_ALERT\_1\_C Torsion Calc 1.9(6), Rep 3.0(9), Dev.. 1.83 Sigma  
C(20-C(30-C(43-C(42 1\_555 1\_555 1\_555 1\_555 # 119 Check

**Author Response: The structure is affected by some strain. Crystal imperfections can not be excluded either.**

PLAT703\_ALERT\_1\_C Torsion Calc -179.7(4), Rep 179.5(5), Dev.. 2.00 Sigma  
O(8)-C(32)-C(41)-C(36) 1\_555 1\_555 1\_555 1\_555 # 121 Check

**Author Response: The structure is affected by some strain. Crystal imperfections can not be excluded either.**

PLAT703\_ALERT\_1\_C Torsion Calc 178.0(4), Rep 178.8(5), Dev.. 2.00 Sigma  
C(2)-C(32)-C(41)-O(9) 1\_555 1\_555 1\_555 1\_555 # 122 Check

**Author Response: The structure is affected by some strain. Crystal imperfections can not be excluded either.**

PLAT703\_ALERT\_1\_C Torsion Calc -0.5(6), Rep 0.4(8), Dev.. 1.50 Sigma  
C(22)-C(36)-C(41)-C(32) 1\_555 1\_555 1\_555 1\_555 # 127 Check

**Author Response: The structure is affected by some strain. Crystal imperfections can not be excluded either.**

PLAT703\_ALERT\_1\_C Torsion Calc 178.7(4), Rep 178.2(5), Dev.. 1.25 Sigma  
O(1)-C(42)-C(43)-C(30) 1\_555 1\_555 1\_555 1\_555 # 134 Check

**Author Response: The structure is affected by some strain. Crystal imperfections can not be excluded either.**

PLAT703\_ALERT\_1\_C Torsion Calc -4.0(7), Rep -5.1(9), Dev.. 1.57 Sigma  
C(37)-C(42)-C(43)-C(30) 1\_555 1\_555 1\_555 1\_555 # 136 Check

**Author Response: The structure is affected by some strain. Crystal imperfections can not be excluded either.**

PLAT703\_ALERT\_1\_C Torsion Calc 6.6(4), Rep 5.9(6), Dev.. 1.75 Sigma  
C(35)-C(50)-C(53)-C(52) 1\_555 1\_555 1\_555 1\_555 # 140 Check

**Author Response: The structure is affected by some strain. Crystal imperfections can not be excluded either.**

PLAT703\_ALERT\_1\_C Torsion Calc -30.0(4), Rep -29.5(6), Dev.. 1.25 Sigma  
N(3)-C(52)-C(53)-C(50) 1\_555 1\_555 1\_555 1\_555 # 141 Check

**Author Response: The structure is affected by some strain. Crystal imperfections can not be excluded either.**

|                           |        |              |                   |                |
|---------------------------|--------|--------------|-------------------|----------------|
| PLAT751_ALERT_4_C Bond    | Calc   | 0.95000, Rep | 0.950(5) .....    | Senseless s.u. |
| C(2)                      | -H(1)  | 1_555        | 1_555 .....       | # 34 Check     |
| PLAT751_ALERT_4_C Bond    | Calc   | 0.95000, Rep | 0.950(6) .....    | Senseless s.u. |
| C(17)                     | -H(2)  | 1_555        | 1_555 .....       | # 40 Check     |
| PLAT751_ALERT_4_C Bond    | Calc   | 0.95000, Rep | 0.950(5) .....    | Senseless s.u. |
| C(21)                     | -H(3)  | 1_555        | 1_555 .....       | # 46 Check     |
| PLAT751_ALERT_4_C Bond    | Calc   | 0.95000, Rep | 0.950(4) .....    | Senseless s.u. |
| C(26)                     | -H(4)  | 1_555        | 1_555 .....       | # 51 Check     |
| PLAT751_ALERT_4_C Bond    | Calc   | 0.95000, Rep | 0.950(5) .....    | Senseless s.u. |
| C(27)                     | -H(5)  | 1_555        | 1_555 .....       | # 53 Check     |
| PLAT751_ALERT_4_C Bond    | Calc   | 0.95000, Rep | 0.950(5) .....    | Senseless s.u. |
| C(36)                     | -H(6)  | 1_555        | 1_555 .....       | # 69 Check     |
| PLAT751_ALERT_4_C Bond    | Calc   | 0.95000, Rep | 0.950(5) .....    | Senseless s.u. |
| C(37)                     | -H(7)  | 1_555        | 1_555 .....       | # 71 Check     |
| PLAT751_ALERT_4_C Bond    | Calc   | 0.95000, Rep | 0.950(6) .....    | Senseless s.u. |
| C(47)                     | -H(8)  | 1_555        | 1_555 .....       | # 84 Check     |
| PLAT751_ALERT_4_C Bond    | Calc   | 0.95000, Rep | 0.950(6) .....    | Senseless s.u. |
| C(48)                     | -H(9)  | 1_555        | 1_555 .....       | # 85 Check     |
| PLAT752_ALERT_4_C Angle   | Calc   | 119.00, Rep  | 119.1(4) .....    | Senseless s.u. |
| C(24)                     | -C(2)  | -H(1)        | 1_555 1_555 1_555 | # 33 Check     |
| PLAT752_ALERT_4_C Angle   | Calc   | 120.00, Rep  | 119.5(4) .....    | Senseless s.u. |
| C(32)                     | -C(2)  | -H(1)        | 1_555 1_555 1_555 | # 34 Check     |
| PLAT752_ALERT_4_C Angle   | Calc   | 121.00, Rep  | 121.2(4) .....    | Senseless s.u. |
| C(26)                     | -C(17) | -H(2)        | 1_555 1_555 1_555 | # 39 Check     |
| PLAT752_ALERT_4_C Angle   | Calc   | 120.00, Rep  | 120.1(4) .....    | Senseless s.u. |
| C(29)                     | -C(17) | -H(2)        | 1_555 1_555 1_555 | # 40 Check     |
| PLAT752_ALERT_4_C Angle   | Calc   | 121.00, Rep  | 120.5(4) .....    | Senseless s.u. |
| C(29)                     | -C(21) | -H(3)        | 1_555 1_555 1_555 | # 45 Check     |
| PLAT752_ALERT_4_C Angle   | Calc   | 120.00, Rep  | 119.9(4) .....    | Senseless s.u. |
| C(38)                     | -C(21) | -H(3)        | 1_555 1_555 1_555 | # 46 Check     |
| PLAT752_ALERT_4_C Angle   | Calc   | 118.00, Rep  | 117.6(4) .....    | Senseless s.u. |
| C(3)                      | -C(26) | -H(4)        | 1_555 1_555 1_555 | # 57 Check     |
| PLAT752_ALERT_4_C Angle   | Calc   | 120.00, Rep  | 119.8(4) .....    | Senseless s.u. |
| C(17)                     | -C(26) | -H(4)        | 1_555 1_555 1_555 | # 58 Check     |
| PLAT752_ALERT_4_C Angle   | Calc   | 119.00, Rep  | 119.1(4) .....    | Senseless s.u. |
| C(25)                     | -C(27) | -H(5)        | 1_555 1_555 1_555 | # 60 Check     |
| PLAT752_ALERT_4_C Angle   | Calc   | 119.00, Rep  | 118.9(5) .....    | Senseless s.u. |
| C(40)                     | -C(27) | -H(5)        | 1_555 1_555 1_555 | # 61 Check     |
| PLAT752_ALERT_4_C Angle   | Calc   | 119.00, Rep  | 119.3(4) .....    | Senseless s.u. |
| C(22)                     | -C(36) | -H(6)        | 1_555 1_555 1_555 | # 99 Check     |
| PLAT752_ALERT_4_C Angle   | Calc   | 119.00, Rep  | 119.5(5) .....    | Senseless s.u. |
| C(41)                     | -C(36) | -H(6)        | 1_555 1_555 1_555 | # 100 Check    |
| PLAT752_ALERT_4_C Angle   | Calc   | 120.00, Rep  | 120.0(5) .....    | Senseless s.u. |
| C(28)                     | -C(37) | -H(7)        | 1_555 1_555 1_555 | # 102 Check    |
| PLAT752_ALERT_4_C Angle   | Calc   | 120.00, Rep  | 120.2(6) .....    | Senseless s.u. |
| C(42)                     | -C(37) | -H(7)        | 1_555 1_555 1_555 | # 103 Check    |
| PLAT752_ALERT_4_C Angle   | Calc   | 117.00, Rep  | 117.2(5) .....    | Senseless s.u. |
| C(1)                      | -C(47) | -H(8)        | 1_555 1_555 1_555 | # 144 Check    |
| PLAT752_ALERT_4_C Angle   | Calc   | 119.00, Rep  | 118.9(5) .....    | Senseless s.u. |
| C(48)                     | -C(47) | -H(8)        | 1_555 1_555 1_555 | # 145 Check    |
| PLAT752_ALERT_4_C Angle   | Calc   | 120.00, Rep  | 119.9(5) .....    | Senseless s.u. |
| C(40)                     | -C(48) | -H(9)        | 1_555 1_555 1_555 | # 147 Check    |
| PLAT752_ALERT_4_C Angle   | Calc   | 121.00, Rep  | 121.4(6) .....    | Senseless s.u. |
| C(47)                     | -C(48) | -H(9)        | 1_555 1_555 1_555 | # 148 Check    |
| PLAT754_ALERT_4_C Contact | Calc   | 3.15000, Rep | 3.150(3) .....    | Senseless s.u. |
| CL(3)                     | -H(3)  | 1_555        | 1_556 .....       | # 106 Check    |
| PLAT754_ALERT_4_C Contact | Calc   | 3.31000, Rep | 3.306(3) .....    | Senseless s.u. |

|                                |              |          |       |                |
|--------------------------------|--------------|----------|-------|----------------|
| CL(3) -H(7)                    | 1_555        | 3_657    | ..... | # 106 Check    |
| PLAT754_ALERT_4_C Contact Calc | 2.92000, Rep | 2.922(5) | ..... | Senseless s.u. |
| O(1) -H(9)                     | 1_555        | 1_555    | ..... | # 106 Check    |
| PLAT754_ALERT_4_C Contact Calc | 2.89000, Rep | 2.887(5) | ..... | Senseless s.u. |
| O(1) -H(9)                     | 1_555        | 3_657    | ..... | # 106 Check    |
| PLAT754_ALERT_4_C Contact Calc | 3.15000, Rep | 3.147(4) | ..... | Senseless s.u. |
| O(5) -H(6)                     | 1_555        | 1_555    | ..... | # 106 Check    |
| PLAT754_ALERT_4_C Contact Calc | 2.68000, Rep | 2.683(5) | ..... | Senseless s.u. |
| O(5) -H(8)                     | 1_555        | 1_555    | ..... | # 106 Check    |
| PLAT754_ALERT_4_C Contact Calc | 3.15000, Rep | 3.154(4) | ..... | Senseless s.u. |
| O(6) -H(1)                     | 1_555        | 4_555    | ..... | # 106 Check    |
| PLAT754_ALERT_4_C Contact Calc | 2.77000, Rep | 2.772(4) | ..... | Senseless s.u. |
| O(7) -H(7)                     | 1_555        | 3_656    | ..... | # 106 Check    |
| PLAT754_ALERT_4_C Contact Calc | 2.67000, Rep | 2.672(6) | ..... | Senseless s.u. |
| O(8) -H(2)                     | 1_555        | 1_455    | ..... | # 106 Check    |
| PLAT754_ALERT_4_C Contact Calc | 3.49000, Rep | 3.492(5) | ..... | Senseless s.u. |
| O(8) -H(4)                     | 1_555        | 1_455    | ..... | # 106 Check    |
| PLAT754_ALERT_4_C Contact Calc | 2.82000, Rep | 2.822(5) | ..... | Senseless s.u. |
| O(9) -H(5)                     | 1_555        | 1_554    | ..... | # 106 Check    |
| PLAT754_ALERT_4_C Contact Calc | 2.85000, Rep | 2.850(4) | ..... | Senseless s.u. |
| O(10) -H(4)                    | 1_555        | 1_455    | ..... | # 106 Check    |
| PLAT754_ALERT_4_C Contact Calc | 2.99000, Rep | 2.988(5) | ..... | Senseless s.u. |
| C(2) -H(4)                     | 1_555        | 1_455    | ..... | # 106 Check    |
| PLAT754_ALERT_4_C Contact Calc | 3.20000, Rep | 3.201(6) | ..... | Senseless s.u. |
| C(21) -H(6)                    | 1_555        | 1_555    | ..... | # 106 Check    |
| PLAT754_ALERT_4_C Contact Calc | 3.52000, Rep | 3.521(5) | ..... | Senseless s.u. |
| C(24) -H(4)                    | 1_555        | 1_455    | ..... | # 106 Check    |
| PLAT754_ALERT_4_C Contact Calc | 3.33000, Rep | 3.330(6) | ..... | Senseless s.u. |
| C(28) -H(8)                    | 1_555        | 1_555    | ..... | # 106 Check    |
| PLAT754_ALERT_4_C Contact Calc | 3.36000, Rep | 3.357(6) | ..... | Senseless s.u. |
| C(32) -H(2)                    | 1_555        | 1_455    | ..... | # 106 Check    |
| PLAT754_ALERT_4_C Contact Calc | 3.19000, Rep | 3.190(6) | ..... | Senseless s.u. |
| C(32) -H(4)                    | 1_555        | 1_455    | ..... | # 106 Check    |
| PLAT754_ALERT_4_C Contact Calc | 3.19000, Rep | 3.186(5) | ..... | Senseless s.u. |
| C(37) -H(8)                    | 1_555        | 1_555    | ..... | # 106 Check    |
| PLAT754_ALERT_4_C Contact Calc | 3.54000, Rep | 3.544(6) | ..... | Senseless s.u. |
| C(37) -H(9)                    | 1_555        | 1_555    | ..... | # 106 Check    |
| PLAT754_ALERT_4_C Contact Calc | 3.58000, Rep | 3.578(5) | ..... | Senseless s.u. |
| C(39) -H(6)                    | 1_555        | 1_655    | ..... | # 106 Check    |
| PLAT754_ALERT_4_C Contact Calc | 3.40000, Rep | 3.405(5) | ..... | Senseless s.u. |
| C(40) -H(3)                    | 1_555        | 1_556    | ..... | # 106 Check    |
| PLAT754_ALERT_4_C Contact Calc | 3.31000, Rep | 3.309(6) | ..... | Senseless s.u. |
| C(42) -H(8)                    | 1_555        | 1_555    | ..... | # 106 Check    |
| PLAT754_ALERT_4_C Contact Calc | 3.19000, Rep | 3.193(6) | ..... | Senseless s.u. |
| C(42) -H(9)                    | 1_555        | 1_555    | ..... | # 106 Check    |
| PLAT754_ALERT_4_C Contact Calc | 3.51000, Rep | 3.508(5) | ..... | Senseless s.u. |
| C(43) -H(8)                    | 1_555        | 1_555    | ..... | # 106 Check    |
| PLAT754_ALERT_4_C Contact Calc | 3.43000, Rep | 3.430(5) | ..... | Senseless s.u. |
| C(44) -H(6)                    | 1_555        | 1_655    | ..... | # 106 Check    |
| PLAT754_ALERT_4_C Contact Calc | 3.46000, Rep | 3.466(5) | ..... | Senseless s.u. |
| C(50) -H(2)                    | 1_555        | 4_555    | ..... | # 106 Check    |
| PLAT754_ALERT_4_C Contact Calc | 3.04000, Rep | 3.042(8) | ..... | Senseless s.u. |
| C(54) -H(5)                    | 1_555        | 1_554    | ..... | # 106 Check    |
| PLAT754_ALERT_4_C Contact Calc | 3.40000, Rep | 3.397(8) | ..... | Senseless s.u. |
| C(55) -H(1)                    | 1_555        | 4_554    | ..... | # 106 Check    |
| PLAT754_ALERT_4_C Contact Calc | 3.34000, Rep | 3.336(8) | ..... | Senseless s.u. |
| C(55) -H(2)                    | 1_555        | 1_455    | ..... | # 106 Check    |

|                                |              |                |                |
|--------------------------------|--------------|----------------|----------------|
| PLAT754_ALERT_4_C Contact Calc | 3.52000, Rep | 3.515(8) ..... | Senseless s.u. |
| C(56) -H(7)                    | 1_555        | 3_657 .....    | # 106 Check    |
| PLAT754_ALERT_4_C Contact Calc | 3.45000, Rep | 3.452(7) ..... | Senseless s.u. |
| C(56) -H(9)                    | 1_555        | 1_555 .....    | # 106 Check    |
| PLAT754_ALERT_4_C Contact Calc | 3.15000, Rep | 3.154(4) ..... | Senseless s.u. |
| H(1) -O(6)                     | 1_555        | 4_554 .....    | # 106 Check    |
| PLAT754_ALERT_4_C Contact Calc | 3.40000, Rep | 3.397(8) ..... | Senseless s.u. |
| H(1) -C(55)                    | 1_555        | 4_555 .....    | # 106 Check    |
| PLAT754_ALERT_4_C Contact Calc | 3.44000, Rep | 3.436(5) ..... | Senseless s.u. |
| H(1) -H(2)                     | 1_555        | 1_455 .....    | # 106 Check    |
| PLAT754_ALERT_4_C Contact Calc | 3.04000, Rep | 3.038(5) ..... | Senseless s.u. |
| H(1) -H(4)                     | 1_555        | 1_455 .....    | # 106 Check    |
| PLAT754_ALERT_4_C Contact Calc | 2.67000, Rep | 2.672(6) ..... | Senseless s.u. |
| H(2) -O(8)                     | 1_555        | 1_655 .....    | # 106 Check    |
| PLAT754_ALERT_4_C Contact Calc | 3.36000, Rep | 3.357(6) ..... | Senseless s.u. |
| H(2) -C(32)                    | 1_555        | 1_655 .....    | # 106 Check    |
| PLAT754_ALERT_4_C Contact Calc | 3.46000, Rep | 3.466(5) ..... | Senseless s.u. |
| H(2) -C(50)                    | 1_555        | 4_554 .....    | # 106 Check    |
| PLAT754_ALERT_4_C Contact Calc | 3.34000, Rep | 3.336(8) ..... | Senseless s.u. |
| H(2) -C(55)                    | 1_555        | 1_655 .....    | # 106 Check    |
| PLAT754_ALERT_4_C Contact Calc | 3.44000, Rep | 3.436(5) ..... | Senseless s.u. |
| H(2) -H(1)                     | 1_555        | 1_655 .....    | # 106 Check    |
| PLAT754_ALERT_4_C Contact Calc | 3.15000, Rep | 3.150(3) ..... | Senseless s.u. |
| H(3) -CL(3)                    | 1_555        | 1_554 .....    | # 106 Check    |
| PLAT754_ALERT_4_C Contact Calc | 3.40000, Rep | 3.405(5) ..... | Senseless s.u. |
| H(3) -C(40)                    | 1_555        | 1_554 .....    | # 106 Check    |
| PLAT754_ALERT_4_C Contact Calc | 2.93000, Rep | 2.932(6) ..... | Senseless s.u. |
| H(3) -H(6)                     | 1_555        | 1_555 .....    | # 106 Check    |
| PLAT754_ALERT_4_C Contact Calc | 3.49000, Rep | 3.492(5) ..... | Senseless s.u. |
| H(4) -O(8)                     | 1_555        | 1_655 .....    | # 106 Check    |
| PLAT754_ALERT_4_C Contact Calc | 2.85000, Rep | 2.850(4) ..... | Senseless s.u. |
| H(4) -O(10)                    | 1_555        | 1_655 .....    | # 106 Check    |
| PLAT754_ALERT_4_C Contact Calc | 2.99000, Rep | 2.988(5) ..... | Senseless s.u. |
| H(4) -C(2)                     | 1_555        | 1_655 .....    | # 106 Check    |
| PLAT754_ALERT_4_C Contact Calc | 3.52000, Rep | 3.521(5) ..... | Senseless s.u. |
| H(4) -C(24)                    | 1_555        | 1_655 .....    | # 106 Check    |
| PLAT754_ALERT_4_C Contact Calc | 3.19000, Rep | 3.190(6) ..... | Senseless s.u. |
| H(4) -C(32)                    | 1_555        | 1_655 .....    | # 106 Check    |
| PLAT754_ALERT_4_C Contact Calc | 3.04000, Rep | 3.038(5) ..... | Senseless s.u. |
| H(4) -H(1)                     | 1_555        | 1_655 .....    | # 106 Check    |
| PLAT754_ALERT_4_C Contact Calc | 2.82000, Rep | 2.822(5) ..... | Senseless s.u. |
| H(5) -O(9)                     | 1_555        | 1_556 .....    | # 106 Check    |
| PLAT754_ALERT_4_C Contact Calc | 3.04000, Rep | 3.042(8) ..... | Senseless s.u. |
| H(5) -C(54)                    | 1_555        | 1_556 .....    | # 106 Check    |
| PLAT754_ALERT_4_C Contact Calc | 3.15000, Rep | 3.147(4) ..... | Senseless s.u. |
| H(6) -O(5)                     | 1_555        | 1_555 .....    | # 106 Check    |
| PLAT754_ALERT_4_C Contact Calc | 3.20000, Rep | 3.201(6) ..... | Senseless s.u. |
| H(6) -C(21)                    | 1_555        | 1_555 .....    | # 106 Check    |
| PLAT754_ALERT_4_C Contact Calc | 3.58000, Rep | 3.578(5) ..... | Senseless s.u. |
| H(6) -C(39)                    | 1_555        | 1_455 .....    | # 106 Check    |
| PLAT754_ALERT_4_C Contact Calc | 3.43000, Rep | 3.430(5) ..... | Senseless s.u. |
| H(6) -C(44)                    | 1_555        | 1_455 .....    | # 106 Check    |
| PLAT754_ALERT_4_C Contact Calc | 2.93000, Rep | 2.932(6) ..... | Senseless s.u. |
| H(6) -H(3)                     | 1_555        | 1_555 .....    | # 106 Check    |
| PLAT754_ALERT_4_C Contact Calc | 3.31000, Rep | 3.306(3) ..... | Senseless s.u. |
| H(7) -CL(3)                    | 1_555        | 3_657 .....    | # 106 Check    |
| PLAT754_ALERT_4_C Contact Calc | 2.77000, Rep | 2.772(4) ..... | Senseless s.u. |

|                   |              |              |          |       |                |
|-------------------|--------------|--------------|----------|-------|----------------|
| H(7)              | -O(7)        | 1_555        | 3_656    | ..... | # 106 Check    |
| PLAT754_ALERT_4_C | Contact Calc | 3.52000, Rep | 3.515(8) | ..... | Senseless s.u. |
| H(7)              | -C(56)       | 1_555        | 3_657    | ..... | # 106 Check    |
| PLAT754_ALERT_4_C | Contact Calc | 3.54000, Rep | 3.536(6) | ..... | Senseless s.u. |
| H(7)              | -H(8)        | 1_555        | 1_555    | ..... | # 106 Check    |
| PLAT754_ALERT_4_C | Contact Calc | 3.56000, Rep | 3.562(6) | ..... | Senseless s.u. |
| H(7)              | -H(9)        | 1_555        | 1_555    | ..... | # 106 Check    |
| PLAT754_ALERT_4_C | Contact Calc | 3.58000, Rep | 3.584(6) | ..... | Senseless s.u. |
| H(7)              | -H(9)        | 1_555        | 3_657    | ..... | # 106 Check    |
| PLAT754_ALERT_4_C | Contact Calc | 2.68000, Rep | 2.683(5) | ..... | Senseless s.u. |
| H(8)              | -O(5)        | 1_555        | 1_555    | ..... | # 106 Check    |
| PLAT754_ALERT_4_C | Contact Calc | 3.33000, Rep | 3.330(6) | ..... | Senseless s.u. |
| H(8)              | -C(28)       | 1_555        | 1_555    | ..... | # 106 Check    |
| PLAT754_ALERT_4_C | Contact Calc | 3.19000, Rep | 3.186(5) | ..... | Senseless s.u. |
| H(8)              | -C(37)       | 1_555        | 1_555    | ..... | # 106 Check    |
| PLAT754_ALERT_4_C | Contact Calc | 3.31000, Rep | 3.309(6) | ..... | Senseless s.u. |
| H(8)              | -C(42)       | 1_555        | 1_555    | ..... | # 106 Check    |
| PLAT754_ALERT_4_C | Contact Calc | 3.51000, Rep | 3.508(5) | ..... | Senseless s.u. |
| H(8)              | -C(43)       | 1_555        | 1_555    | ..... | # 106 Check    |
| PLAT754_ALERT_4_C | Contact Calc | 3.54000, Rep | 3.536(6) | ..... | Senseless s.u. |
| H(8)              | -H(7)        | 1_555        | 1_555    | ..... | # 106 Check    |
| PLAT754_ALERT_4_C | Contact Calc | 2.92000, Rep | 2.922(5) | ..... | Senseless s.u. |
| H(9)              | -O(1)        | 1_555        | 1_555    | ..... | # 106 Check    |
| PLAT754_ALERT_4_C | Contact Calc | 2.89000, Rep | 2.887(5) | ..... | Senseless s.u. |
| H(9)              | -O(1)        | 1_555        | 3_657    | ..... | # 106 Check    |
| PLAT754_ALERT_4_C | Contact Calc | 3.54000, Rep | 3.544(6) | ..... | Senseless s.u. |
| H(9)              | -C(37)       | 1_555        | 1_555    | ..... | # 106 Check    |
| PLAT754_ALERT_4_C | Contact Calc | 3.19000, Rep | 3.193(6) | ..... | Senseless s.u. |
| H(9)              | -C(42)       | 1_555        | 1_555    | ..... | # 106 Check    |
| PLAT754_ALERT_4_C | Contact Calc | 3.45000, Rep | 3.452(7) | ..... | Senseless s.u. |
| H(9)              | -C(56)       | 1_555        | 1_555    | ..... | # 106 Check    |
| PLAT754_ALERT_4_C | Contact Calc | 3.56000, Rep | 3.562(6) | ..... | Senseless s.u. |
| H(9)              | -H(7)        | 1_555        | 1_555    | ..... | # 106 Check    |
| PLAT754_ALERT_4_C | Contact Calc | 3.58000, Rep | 3.584(6) | ..... | Senseless s.u. |
| H(9)              | -H(7)        | 1_555        | 3_657    | ..... | # 106 Check    |

---

### Alert level G

|                   |                                                  |              |
|-------------------|--------------------------------------------------|--------------|
| PLAT005_ALERT_5_G | No Embedded Refinement Details Found in the CIF  | Please Do !  |
| PLAT199_ALERT_1_G | Reported _cell_measurement_temperature ..... (K) | 293 Check    |
| PLAT200_ALERT_1_G | Reported _diffn_ambient_temperature ..... (K)    | 293 Check    |
| PLAT343_ALERT_2_G | Unusual sp3 Angle Range in Main Residue for      | C49 Check    |
| PLAT793_ALERT_4_G | Model has Chirality at C33 (Centro SpGr)         | R Verify     |
| PLAT793_ALERT_4_G | Model has Chirality at C45 (Centro SpGr)         | R Verify     |
| PLAT808_ALERT_5_G | No Parseable SHELXL Style Weighting Scheme Found | Please Check |
| PLAT882_ALERT_1_G | No Datum for _diffn_reflms_av_unetI/netI .....   | Please Do !  |
| PLAT883_ALERT_1_G | Absent Datum for _atom_sites_solution_primary .. | Please Do !  |

- 
- 4 **ALERT level A** = Most likely a serious problem - resolve or explain  
 21 **ALERT level B** = A potentially serious problem, consider carefully  
 185 **ALERT level C** = Check. Ensure it is not caused by an omission or oversight  
 9 **ALERT level G** = General information/check it is not something unexpected
- 61 ALERT type 1 CIF construction/syntax error, inconsistent or missing data

```
45 ALERT type 2 Indicator that the structure model may be wrong or deficient
3 ALERT type 3 Indicator that the structure quality may be low
108 ALERT type 4 Improvement, methodology, query or suggestion
2 ALERT type 5 Informative message, check
```

---

It is advisable to attempt to resolve as many as possible of the alerts in all categories. Often the minor alerts point to easily fixed oversights, errors and omissions in your CIF or refinement strategy, so attention to these fine details can be worthwhile. In order to resolve some of the more serious problems it may be necessary to carry out additional measurements or structure refinements. However, the purpose of your study may justify the reported deviations and the more serious of these should normally be commented upon in the discussion or experimental section of a paper or in the "special\_details" fields of the CIF. checkCIF was carefully designed to identify outliers and unusual parameters, but every test has its limitations and alerts that are not important in a particular case may appear. Conversely, the absence of alerts does not guarantee there are no aspects of the results needing attention. It is up to the individual to critically assess their own results and, if necessary, seek expert advice.

### **Publication of your CIF in IUCr journals**

A basic structural check has been run on your CIF. These basic checks will be run on all CIFs submitted for publication in IUCr journals (*Acta Crystallographica*, *Journal of Applied Crystallography*, *Journal of Synchrotron Radiation*); however, if you intend to submit to *Acta Crystallographica Section C* or *E* or *IUCrData*, you should make sure that full publication checks are run on the final version of your CIF prior to submission.

### **Publication of your CIF in other journals**

Please refer to the *Notes for Authors* of the relevant journal for any special instructions relating to CIF submission.

### **Validation response form**

Please find below a validation response form (VRF) that can be filled in and pasted into your CIF.

```
# start Validation Reply Form
_vrf_REFLT02__143734_1
;
PROBLEM: The number of reflections greater than the sigma threshold
RESPONSE: ...
;
_vrf_DIFMN03__143734_1
;
PROBLEM: The minimum difference density is < -0.1*ZMAX*0.75
RESPONSE: ...
;
_vrf_DIFMX02__143734_1
;
PROBLEM: The maximum difference density is > 0.1*ZMAX*0.75
RESPONSE: ...
;
```

```

_vrf_PLAT230__143734_1
;
PROBLEM: Hirshfeld Test Diff for    C11      --C29      .      8.3 s.u.
RESPONSE: ...
;
_vrf_PLAT241__143734_1
;
PROBLEM: High    'MainMol' Ueq as Compared to Neighbors of      C49 Check
RESPONSE: ...
;
_vrf_PLAT360__143734_1
;
PROBLEM: Short   C(sp3)-C(sp3) Bond  C49      - C56      .      1.30 Ang.
RESPONSE: ...
;
_vrf_PLAT410__143734_1
;
PROBLEM: Short Intra H...H Contact  H23      ..H36      .      1.87 Ang.
RESPONSE: ...
;
_vrf_PLAT029__143734_1
;
PROBLEM: _diffn_measured_fraction_theta_full value Low .      0.977 Why?
RESPONSE: ...
;
_vrf_PLAT213__143734_1
;
PROBLEM: Atom C49                      has ADP max/min Ratio .....      3.9 prolat
RESPONSE: ...
;
_vrf_PLAT220__143734_1
;
PROBLEM: NonSolvent   Resd 1   C    Ueq(max)/Ueq(min) Range      5.4 Ratio
RESPONSE: ...
;
_vrf_PLAT222__143734_1
;
PROBLEM: NonSolvent Resd 1   H    Uiso(max)/Uiso(min) Range      4.6 Ratio
RESPONSE: ...
;
_vrf_PLAT234__143734_1
;
PROBLEM: Large Hirshfeld Difference O1      --C56      .      0.16 Ang.
RESPONSE: ...
;
_vrf_PLAT242__143734_1
;
PROBLEM: Low    'MainMol' Ueq as Compared to Neighbors of      O1 Check
RESPONSE: ...
;
_vrf_PLAT340__143734_1
;
PROBLEM: Low Bond Precision on   C-C Bonds .....      0.00594 Ang.
RESPONSE: ...
;
_vrf_PLAT601__143734_1
;

```



```
PROBLEM: Unit Cell Contains Solvent Accessible VOIDS    <=          51 Ang**3
RESPONSE: ...
;
_vrf_PLAT751__143734_1
;
PROBLEM: Bond      Calc      0.95000, Rep      0.950(5) ..... Senseless s.u.
RESPONSE: ...
;
_vrf_PLAT752__143734_1
;
PROBLEM: Angle     Calc      119.00, Rep      119.1(4) ..... Senseless s.u.
RESPONSE: ...
;
_vrf_PLAT754__143734_1
;
PROBLEM: Contact Calc      3.15000, Rep      3.150(3) ..... Senseless s.u.
RESPONSE: ...
;
# end Validation Reply Form
```

---

**PLATON version of 04/06/2025; check.def file version of 30/05/2025**

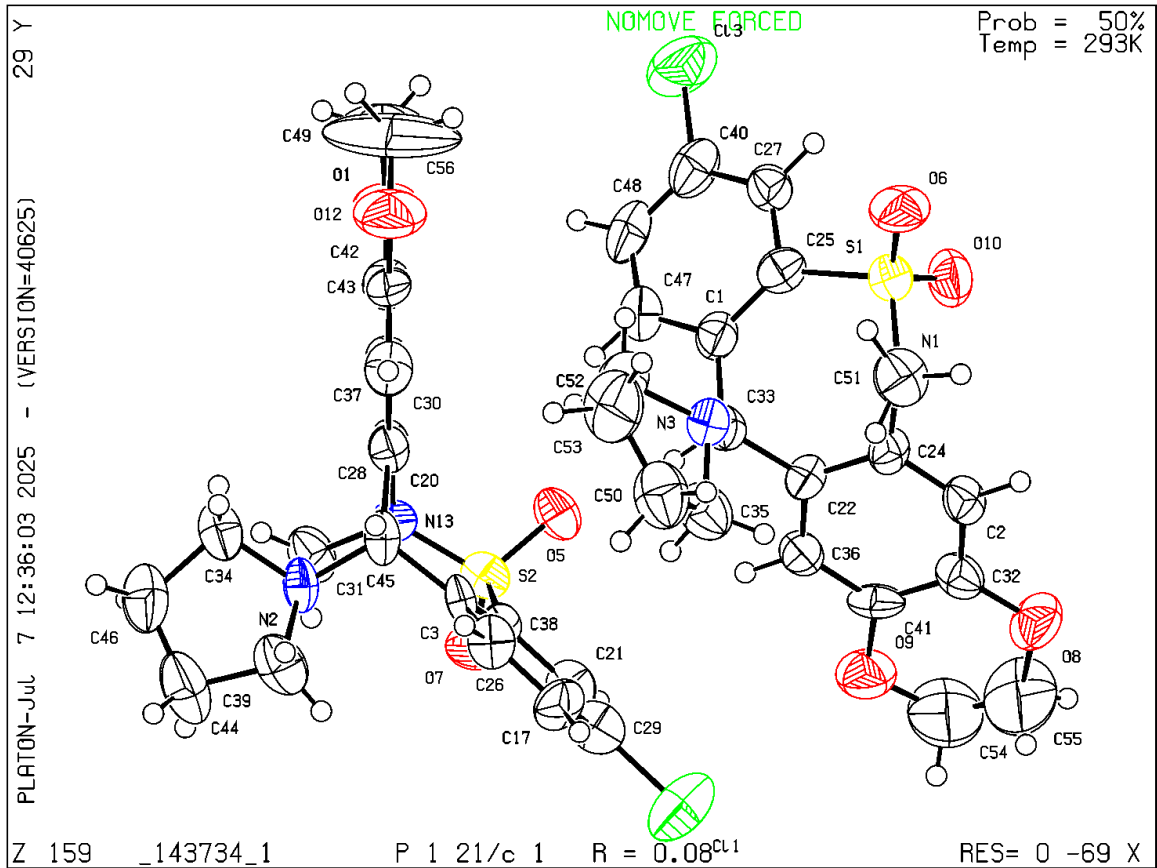

Supplement: Additional file 2 [file compound 21g checkcif.pdf › compound 21g checkcif.pdf]
