# Supplementary material for: Synthesis of new tetra- and pentacyclic, methylenedioxy- and ethylenedioxy-substituted derivatives of the dibenzo[ c , f ][1,2]thiazepine ring system
Source: publisher site journal article supplement (doi:10.3762/bjoc.21.205), 2025-12-09

## checkCIF/PLATON report

You have not supplied any structure factors. As a result the full set of tests cannot be run.

THIS REPORT IS FOR GUIDANCE ONLY. IF USED AS PART OF A REVIEW PROCEDURE FOR PUBLICATION, IT SHOULD NOT REPLACE THE EXPERTISE OF AN EXPERIENCED CRYSTALLOGRAPHIC REFEREE.

No syntax errors found.      CIF dictionary      Interpreting this report

### Datablock: \_144830\_1

---

Bond precision:      C-C = 0.0035 Å      Wavelength=1.54187

Cell:                      a=6.6806(5)      b=21.7251(14)      c=12.1261(8)  
                                alpha=90      beta=92.707(4)      gamma=90

Temperature:              293 K

|                        | Calculated                    | Reported           |
|------------------------|-------------------------------|--------------------|
| Volume                 | 1758.0(2)                     | 1758.0(2)          |
| Space group            | P 21/a                        | P 1 21/a 1         |
| Hall group             | -P 2yab                       | -P 2yab            |
| Moiety formula         | 2(C17 H14 Cl N O5 S), C4 H6 N | C19 H17 Cl N2 O5 S |
| Sum formula            | C38 H34 Cl2 N3 O10 S2         | C19 H17 Cl N2 O5 S |
| Mr                     | 827.70                        | 420.87             |
| Dx, g cm <sup>-3</sup> | 1.564                         | 1.590              |
| Z                      | 2                             | 4                  |
| Mu (mm <sup>-1</sup> ) | 3.347                         | 3.368              |
| F000                   | 858.0                         | 872.0              |
| F000'                  | 863.25                        |                    |
| h,k,lmax               | 8,26,14                       | 8,26,14            |
| Nref                   | 3441                          | 3324               |
| Tmin,Tmax              | 0.730,0.845                   | 0.549,0.845        |
| Tmin'                  | 0.359                         |                    |

Correction method= # Reported T Limits: Tmin=0.549 Tmax=0.845  
AbsCorr = MULTI-SCAN

Data completeness= 0.966      Theta(max)= 71.700

R(reflections)= 0.0726( 13258)

wR2(reflections)=  
0.1078( 13358)

S = 1.036

Npar= 279

---

The following ALERTS were generated. Each ALERT has the format

**test-name\_ALERT\_alert-type\_alert-level.**

Click on the hyperlinks for more details of the test.

---

### Alert level A

DIFMN02\_ALERT\_2\_A The minimum difference density is < -0.1\*ZMAX\*2.00  
\_refine\_diff\_density\_min given = -7.570  
Test value = -3.400

**Author Response: Although the residual density is out of border but there is no doubt about the chemical structure taking into account other evidences, e.g. NMR. The error maybe due to crystal imperfections.**

PLAT097\_ALERT\_2\_A Large Reported Max. (Positive) Residual Density 6.13 eA-3

**Author Response: Although the residual density is out of border but there is no doubt about the chemical structure taking into account other evidences, e.g. NMR. The error maybe due to crystal imperfections.**

PLAT098\_ALERT\_2\_A Large Reported Min. (Negative) Residual Density -7.57 eA-3

**Author Response: Although the residual density is out of border but there is no doubt about the chemical structure taking into account other evidences, e.g. NMR. The error maybe due to crystal imperfections.**

PLAT703\_ALERT\_1\_A Torsion Calc -169.84(16), Rep -169.2(2), Dev.. 4.00 Sigma  
O(6)-S(1)-N(1)-C(21 1\_555 1\_555 1\_555 1\_555 # 6 Check

**Author Response: The structure is affected by some strain. Crystal imperfections can not be excluded either.**

PLAT703\_ALERT\_1\_A Torsion Calc -63.8(2), Rep -64.9(3), Dev.. 5.50 Sigma  
S(1)-N(1)-C(21-C(19 1\_555 1\_555 1\_555 1\_555 # 24 Check

**Author Response: The structure is affected by some strain. Crystal imperfections can not be excluded either.**

---

### Alert level B

REFLT02\_ALERT\_1\_B The number of reflections greater than the sigma threshold  
cannot exceed the number of symmetry-independent reflections  
Number of symmetry-independent reflections = 3324  
Number of reflections greater than sigma threshold = 13258

PLAT043\_ALERT\_1\_B Calculated and Reported Mol. Weight Differ by .. 14.04 Check  
PLAT230\_ALERT\_2\_B Hirshfeld Test Diff for S1 --O6 . 7.8 s.u.

PLAT230\_ALERT\_2\_B Hirshfeld Test Diff for S1 --N1 . 7.5 s.u.  
 PLAT230\_ALERT\_2\_B Hirshfeld Test Diff for N1 --C21 . 9.5 s.u.  
 PLAT241\_ALERT\_2\_B High 'MainMol' Ueq as Compared to Neighbors of C26 Check  
 PLAT364\_ALERT\_2\_B Short C(sp3)-C(sp) Bond C2 - C28 . 1.22 Ang.  
 PLAT413\_ALERT\_2\_B Short Inter XH3 .. XHn H8 ..H17 . 1.97 Ang.  
 -1+x,y,z = 1\_455 Check  
 PLAT703\_ALERT\_1\_B Torsion Calc -40.54(19), Rep -40.0(2), Dev.. 2.84 Sigma  
 O(5)-S(1)-N(1)-C(21 1\_555 1\_555 1\_555 1\_555 # 2 Check

**Author Response: The structure is affected by some strain. Crystal imperfections can not be excluded either.**

PLAT703\_ALERT\_1\_B Torsion Calc 74.99(18), Rep 75.5(2), Dev.. 2.83 Sigma  
 C(15-S(1)-N(1)-C(21 1\_555 1\_555 1\_555 1\_555 # 12 Check

**Author Response: The structure is affected by some strain. Crystal imperfections can not be excluded either.**

PLAT703\_ALERT\_1\_B Torsion Calc -172.4(2), Rep -173.0(3), Dev.. 3.00 Sigma  
 C(26-O(7)-C(14-C(16 1\_555 1\_555 1\_555 1\_555 # 21 Check

**Author Response: The structure is affected by some strain. Crystal imperfections can not be excluded either.**

PLAT703\_ALERT\_1\_B Torsion Calc 79.0(2), Rep 78.5(4), Dev.. 2.50 Sigma  
 C(11-N(1)-C(21-C(19 1\_555 1\_555 1\_555 1\_555 # 25 Check

**Author Response: The structure is affected by some strain. Crystal imperfections can not be excluded either.**

PLAT703\_ALERT\_1\_B Torsion Calc 118.8(2), Rep 118.2(3), Dev.. 3.00 Sigma  
 C(21-N(1)-C(11-C(16 1\_555 1\_555 1\_555 1\_555 # 27 Check

**Author Response: The structure is affected by some strain. Crystal imperfections can not be excluded either.**

PLAT703\_ALERT\_1\_B Torsion Calc -176.9(2), Rep -177.5(3), Dev.. 3.00 Sigma  
 C(13-C(1)-C(12-C(18 1\_555 1\_555 1\_555 1\_555 # 31 Check

**Author Response: The structure is affected by some strain. Crystal imperfections can not be excluded either.**

PLAT703\_ALERT\_1\_B Torsion Calc 176.0(2), Rep 176.5(3), Dev.. 2.50 Sigma  
 C(16-C(11-C(12-C(18 1\_555 1\_555 1\_555 1\_555 # 47 Check

**Author Response: The structure is affected by some strain. Crystal imperfections can not be excluded either.**

PLAT703\_ALERT\_1\_B Torsion Calc 178.64(16), Rep 179.0(2), Dev.. 2.25 Sigma  
C(15-C(17-C(23-CL(2 1\_555 1\_555 1\_555 1\_555 # 60 Check

**Author Response: The structure is affected by some strain. Crystal imperfections can not be excluded either.**

PLAT703\_ALERT\_1\_B Torsion Calc -59.9(3), Rep -59.0(4), Dev.. 3.00 Sigma  
O(3)-C(19-C(21-N(1) 1\_555 1\_555 1\_555 1\_555 # 62 Check

**Author Response: The structure is affected by some strain. Crystal imperfections can not be excluded either.**

PLAT703\_ALERT\_1\_B Torsion Calc -179.45(16), Rep -179.93(19), Dev.. 3.00 Sigma  
C(20-C(22-C(23-CL(2 1\_555 1\_555 1\_555 1\_555 # 64 Check

**Author Response: The structure is affected by some strain. Crystal imperfections can not be excluded either.**

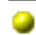

#### Alert level C

DIFMN03\_ALERT\_1\_C The minimum difference density is < -0.1\*ZMAX\*0.75  
The relevant atom site should be identified.

DIFMX02\_ALERT\_1\_C The maximum difference density is > 0.1\*ZMAX\*0.75  
The relevant atom site should be identified.

PLAT029\_ALERT\_3\_C \_diffn\_measured\_fraction\_theta\_full value Low . 0.966 Why?

PLAT041\_ALERT\_1\_C Calc. and Reported SumFormula Strings Differ Please Check  
Calc: C38 H34 Cl2 N3 O10 S2  
Rep.: C19 H17 Cl N2 O5 S

PLAT042\_ALERT\_1\_C Calc. and Reported MoietyFormula Strings Differ Please Check  
Calc: 2(C17 H14 Cl N O5 S), C4 H6 N  
Rep.: C19 H17 Cl N2 O5 S

PLAT068\_ALERT\_1\_C Reported F000 Differs from Calcd (or Missing)... Please Check

PLAT166\_ALERT\_4\_C S.U's Given on Coordinates for Calc-flagged .... H1 Note

PLAT166\_ALERT\_4\_C S.U's Given on Coordinates for Calc-flagged .... H2 Note

PLAT166\_ALERT\_4\_C S.U's Given on Coordinates for Calc-flagged .... H3 Note

PLAT166\_ALERT\_4\_C S.U's Given on Coordinates for Calc-flagged .... H4 Note

PLAT166\_ALERT\_4\_C S.U's Given on Coordinates for Calc-flagged .... H5 Note

PLAT166\_ALERT\_4\_C S.U's Given on Coordinates for Calc-flagged .... H6 Note

PLAT166\_ALERT\_4\_C S.U's Given on Coordinates for Calc-flagged .... H7 Note

PLAT166\_ALERT\_4\_C S.U's Given on Coordinates for Calc-flagged .... H8 Note

PLAT166\_ALERT\_4\_C S.U's Given on Coordinates for Calc-flagged .... H9 Note

PLAT166\_ALERT\_4\_C S.U's Given on Coordinates for Calc-flagged .... H10 Note

PLAT202\_ALERT\_3\_C Isotropic non-H Atoms in Anion/Solvent ..... 3 Check  
N2 C2 C28

PLAT213\_ALERT\_2\_C Atom C26 has ADP max/min Ratio ..... 3.2 prolat

PLAT220\_ALERT\_2\_C NonSolvent Resd 1 C Ueq(max)/Ueq(min) Range 4.6 Ratio

PLAT222\_ALERT\_3\_C NonSolvent Resd 1 H Uiso(max)/Uiso(min) Range 10.0 Ratio

PLAT230\_ALERT\_2\_C Hirshfeld Test Diff for C12 --C23 . 5.3 s.u.  
 PLAT230\_ALERT\_2\_C Hirshfeld Test Diff for C9 --C20 . 6.5 s.u.  
 PLAT242\_ALERT\_2\_C Low 'MainMol' Ueq as Compared to Neighbors of 04 Check  
 PLAT242\_ALERT\_2\_C Low 'MainMol' Ueq as Compared to Neighbors of 07 Check  
 PLAT243\_ALERT\_4\_C High 'Solvent' Ueq as Compared to Neighbors of C28 Check  
 PLAT245\_ALERT\_2\_C U(iso) H3 Smaller than U(eq) C17 by 0.026 Ang\*\*2  
 PLAT245\_ALERT\_2\_C U(iso) H4 Smaller than U(eq) C18 by 0.026 Ang\*\*2  
 PLAT245\_ALERT\_2\_C U(iso) H5 Smaller than U(eq) C1 by 0.015 Ang\*\*2  
 PLAT245\_ALERT\_2\_C U(iso) H7 Smaller than U(eq) C19 by 0.022 Ang\*\*2  
 PLAT245\_ALERT\_2\_C U(iso) H10 Smaller than U(eq) C21 by 0.011 Ang\*\*2  
 PLAT360\_ALERT\_2\_C Short C(sp3)-C(sp3) Bond C25 - C26 . 1.34 Ang.  
 PLAT413\_ALERT\_2\_C Short Inter XH3 .. XHn H13 ..H16 . 2.06 Ang.  
 x,y,1+z = 1\_556 Check  
 PLAT703\_ALERT\_1\_C Torsion Calc 175.82(15), Rep 175.6(2), Dev.. 1.47 Sigma  
 O(5)-S(1)-N(1)-C(11 1\_555 1\_555 1\_555 1\_555 # 1 Check

**Author Response: The structure is affected by some strain. Crystal imperfections can not be excluded either.**

PLAT703\_ALERT\_1\_C Torsion Calc -104.95(19), Rep -105.3(2), Dev.. 1.84 Sigma  
 O(6)-S(1)-C(15-C(9) 1\_555 1\_555 1\_555 1\_555 # 7 Check

**Author Response: The structure is affected by some strain. Crystal imperfections can not be excluded either.**

PLAT703\_ALERT\_1\_C Torsion Calc 75.09(17), Rep 74.9(2), Dev.. 1.12 Sigma  
 O(6)-S(1)-C(15-C(17 1\_555 1\_555 1\_555 1\_555 # 8 Check

**Author Response: The structure is affected by some strain. Crystal imperfections can not be excluded either.**

PLAT703\_ALERT\_1\_C Torsion Calc -68.65(17), Rep -68.9(2), Dev.. 1.47 Sigma  
 C(15-S(1)-N(1)-C(11 1\_555 1\_555 1\_555 1\_555 # 11 Check

**Author Response: The structure is affected by some strain. Crystal imperfections can not be excluded either.**

PLAT703\_ALERT\_1\_C Torsion Calc 64.9(3), Rep 64.5(4), Dev.. 1.33 Sigma  
 C(18-O(3)-C(19-C(21 1\_555 1\_555 1\_555 1\_555 # 13 Check

**Author Response: The structure is affected by some strain. Crystal imperfections can not be excluded either.**

PLAT703\_ALERT\_1\_C Torsion Calc -169.0(2), Rep -168.6(3), Dev.. 2.00 Sigma  
 C(25-O(4)-C(13-C(1) 1\_555 1\_555 1\_555 1\_555 # 17 Check

**Author Response: The structure is affected by some strain. Crystal imperfections can not be excluded either.**

PLAT703\_ALERT\_1\_C Torsion Calc      9.9(3), Rep      10.3(4), Dev..      1.33 Sigma  
C(25-O(4)-C(13-C(14    1\_555    1\_555    1\_555    1\_555      #    18 Check

**Author Response: The structure is affected by some strain. Crystal imperfections can not be excluded either.**

PLAT703\_ALERT\_1\_C Torsion Calc      81.1(2), Rep      81.4(3), Dev..      1.50 Sigma  
S(1)-N(1)-C(11-C(12    1\_555    1\_555    1\_555    1\_555      #    22 Check

**Author Response: The structure is affected by some strain. Crystal imperfections can not be excluded either.**

PLAT703\_ALERT\_1\_C Torsion Calc      2.6(3), Rep      2.0(5), Dev..      2.00 Sigma  
C(13-C(1)-C(12-C(11    1\_555    1\_555    1\_555    1\_555      #    30 Check

**Author Response: The structure is affected by some strain. Crystal imperfections can not be excluded either.**

PLAT703\_ALERT\_1\_C Torsion Calc      48.6(3), Rep      49.0(4), Dev..      1.33 Sigma  
C(15-C(9)-C(18-C(12    1\_555    1\_555    1\_555    1\_555      #    33 Check

**Author Response: The structure is affected by some strain. Crystal imperfections can not be excluded either.**

PLAT703\_ALERT\_1\_C Torsion Calc    -134.3(2), Rep    -133.9(3), Dev..      2.00 Sigma  
C(20-C(9)-C(18-C(12    1\_555    1\_555    1\_555    1\_555      #    41 Check

**Author Response: The structure is affected by some strain. Crystal imperfections can not be excluded either.**

PLAT703\_ALERT\_1\_C Torsion Calc    179.3(2), Rep    179.6(3), Dev..      1.50 Sigma  
N(1)-C(11-C(16-C(14    1\_555    1\_555    1\_555    1\_555      #    44 Check

**Author Response: The structure is affected by some strain. Crystal imperfections can not be excluded either.**

PLAT703\_ALERT\_1\_C Torsion Calc    -3.5(3), Rep    -3.0(5), Dev..      1.67 Sigma  
C(16-C(11-C(12-C(1)    1\_555    1\_555    1\_555    1\_555      #    46 Check

**Author Response: The structure is affected by some strain. Crystal imperfections can not be excluded either.**

PLAT703\_ALERT\_1\_C Torsion Calc    114.6(2), Rep    114.2(3), Dev..      2.00 Sigma  
C(1)-C(12-C(18-C(9)    1\_555    1\_555    1\_555    1\_555      #    49 Check

**Author Response: The structure is affected by some strain. Crystal imperfections can not be excluded either.**

PLAT703\_ALERT\_1\_C Torsion Calc -64.9(3), Rep -65.3(4), Dev.. 1.33 Sigma  
C(11)-C(12)-C(18)-C(9) 1\_555 1\_555 1\_555 1\_555 # 51 Check

**Author Response: The structure is affected by some strain. Crystal imperfections can not be excluded either.**

PLAT703\_ALERT\_1\_C Torsion Calc 176.4(2), Rep 176.0(3), Dev.. 2.00 Sigma  
C(1)-C(13)-C(14)-O(7) 1\_555 1\_555 1\_555 1\_555 # 54 Check

**Author Response: The structure is affected by some strain. Crystal imperfections can not be excluded either.**

PLAT703\_ALERT\_1\_C Torsion Calc -177.4(2), Rep -177.0(3), Dev.. 2.00 Sigma  
O(7)-C(14)-C(16)-C(11) 1\_555 1\_555 1\_555 1\_555 # 56 Check

**Author Response: The structure is affected by some strain. Crystal imperfections can not be excluded either.**

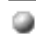

#### Alert level G

FORMU01\_ALERT\_2\_G There is a discrepancy between the atom counts in the  
\_chemical\_formula\_sum and the formula from the \_atom\_site\* data.  
Atom count from \_chemical\_formula\_sum: C19 H17 Cl1 N2 O5 S1  
Atom count from the \_atom\_site data: C19 H17 Cl1 N1.5 O5 S1  
CELLZ01\_ALERT\_1\_G Difference between formula and atom\_site contents detected.  
CELLZ01\_ALERT\_1\_G ALERT: Large difference may be due to a  
symmetry error - see SYMMG tests  
From the CIF: \_cell\_formula\_units\_Z 4  
From the CIF: \_chemical\_formula\_sum C19 H17 Cl1 N2 O5 S  
TEST: Compare cell contents of formula and atom\_site data

| atom | Z*formula | cif sites | diff |
|------|-----------|-----------|------|
| C    | 76.00     | 76.00     | 0.00 |
| H    | 68.00     | 68.00     | 0.00 |
| Cl   | 4.00      | 4.00      | 0.00 |
| N    | 8.00      | 6.00      | 2.00 |
| O    | 20.00     | 20.00     | 0.00 |
| S    | 4.00      | 4.00      | 0.00 |

|                                                                    |              |
|--------------------------------------------------------------------|--------------|
| PLAT005_ALERT_5_G No Embedded Refinement Details Found in the CIF  | Please Do !  |
| PLAT045_ALERT_1_G Calculated and Reported Z Differ by a Factor ... | 0.500 Check  |
| PLAT128_ALERT_4_G Alternate Setting for Input Space Group P21/a    | P21/c Note   |
| PLAT199_ALERT_1_G Reported _cell_measurement_temperature ..... (K) | 293 Check    |
| PLAT200_ALERT_1_G Reported _diffrn_ambient_temperature ..... (K)   | 293 Check    |
| PLAT793_ALERT_4_G Model has Chirality at C18 (Centro SpGr)         | S Verify     |
| PLAT808_ALERT_5_G No Parseable SHELXL Style Weighting Scheme Found | Please Check |
| PLAT882_ALERT_1_G No Datum for _diffrn_reflns_av_unetI/netI .....  | Please Do !  |
| PLAT883_ALERT_1_G Absent Datum for _atom_sites_solution_primary .. | Please Do !  |

---

```

5 ALERT level A = Most likely a serious problem - resolve or explain
18 ALERT level B = A potentially serious problem, consider carefully
49 ALERT level C = Check. Ensure it is not caused by an omission or oversight
12 ALERT level G = General information/check it is not something unexpected

43 ALERT type 1 CIF construction/syntax error, inconsistent or missing data
23 ALERT type 2 Indicator that the structure model may be wrong or deficient
 3 ALERT type 3 Indicator that the structure quality may be low
13 ALERT type 4 Improvement, methodology, query or suggestion
 2 ALERT type 5 Informative message, check

```

---

It is advisable to attempt to resolve as many as possible of the alerts in all categories. Often the minor alerts point to easily fixed oversights, errors and omissions in your CIF or refinement strategy, so attention to these fine details can be worthwhile. In order to resolve some of the more serious problems it may be necessary to carry out additional measurements or structure refinements. However, the purpose of your study may justify the reported deviations and the more serious of these should normally be commented upon in the discussion or experimental section of a paper or in the "special\_details" fields of the CIF. checkCIF was carefully designed to identify outliers and unusual parameters, but every test has its limitations and alerts that are not important in a particular case may appear. Conversely, the absence of alerts does not guarantee there are no aspects of the results needing attention. It is up to the individual to critically assess their own results and, if necessary, seek expert advice.

### Publication of your CIF in IUCr journals

A basic structural check has been run on your CIF. These basic checks will be run on all CIFs submitted for publication in IUCr journals (*Acta Crystallographica*, *Journal of Applied Crystallography*, *Journal of Synchrotron Radiation*); however, if you intend to submit to *Acta Crystallographica Section C* or *E* or *IUCrData*, you should make sure that full publication checks are run on the final version of your CIF prior to submission.

### Publication of your CIF in other journals

Please refer to the *Notes for Authors* of the relevant journal for any special instructions relating to CIF submission.

### Validation response form

Please find below a validation response form (VRF) that can be filled in and pasted into your CIF.

```

# start Validation Reply Form
_vrf_REFLT02__144830_1
;
PROBLEM: The number of reflections greater than the sigma threshold
RESPONSE: ...
;
_vrf_DIFMN03__144830_1
;
PROBLEM: The minimum difference density is < -0.1*ZMAX*0.75
RESPONSE: ...

```



```

;
_vrf_DIFMX02__144830_1
;
PROBLEM: The maximum difference density is > 0.1*ZMAX*0.75
RESPONSE: ...
;
_vrf_PLAT043__144830_1
;
PROBLEM: Calculated and Reported Mol. Weight Differ by ..      14.04 Check
RESPONSE: ...
;
_vrf_PLAT230__144830_1
;
PROBLEM: Hirshfeld Test Diff for      S1      --O6      .      7.8 s.u.
RESPONSE: ...
;
_vrf_PLAT241__144830_1
;
PROBLEM: High      'MainMol' Ueq as Compared to Neighbors of      C26 Check
RESPONSE: ...
;
_vrf_PLAT364__144830_1
;
PROBLEM: Short      C(sp3)-C(sp)      Bond      C2      -      C28      .      1.22 Ang.
RESPONSE: ...
;
_vrf_PLAT413__144830_1
;
PROBLEM: Short Inter XH3 .. XHn      H8      ..H17      .      1.97 Ang.
RESPONSE: ...
;
_vrf_PLAT029__144830_1
;
PROBLEM: _diffn_measured_fraction_theta_full value Low .      0.966 Why?
RESPONSE: ...
;
_vrf_PLAT041__144830_1
;
PROBLEM: Calc. and Reported SumFormula      Strings      Differ      Please Check
RESPONSE: ...
;
_vrf_PLAT042__144830_1
;
PROBLEM: Calc. and Reported MoietyFormula Strings      Differ      Please Check
RESPONSE: ...
;
_vrf_PLAT068__144830_1
;
PROBLEM: Reported F000 Differs from Calcd (or Missing)...      Please Check
RESPONSE: ...
;
_vrf_PLAT166__144830_1
;
PROBLEM: S.U's Given on Coordinates for Calc-flagged ....      H1 Note
RESPONSE: ...
;
_vrf_PLAT202__144830_1

```

```

;
PROBLEM: Isotropic non-H Atoms in Anion/Solvent ..... 3 Check
RESPONSE: ...
;
_vrf_PLAT213__144830_1
;
PROBLEM: Atom C26 has ADP max/min Ratio ..... 3.2 prolat
RESPONSE: ...
;
_vrf_PLAT220__144830_1
;
PROBLEM: NonSolvent Resd 1 C Ueq(max)/Ueq(min) Range 4.6 Ratio
RESPONSE: ...
;
_vrf_PLAT222__144830_1
;
PROBLEM: NonSolvent Resd 1 H Uiso(max)/Uiso(min) Range 10.0 Ratio
RESPONSE: ...
;
_vrf_PLAT242__144830_1
;
PROBLEM: Low 'MainMol' Ueq as Compared to Neighbors of 04 Check
RESPONSE: ...
;
_vrf_PLAT243__144830_1
;
PROBLEM: High 'Solvent' Ueq as Compared to Neighbors of C28 Check
RESPONSE: ...
;
_vrf_PLAT245__144830_1
;
PROBLEM: U(iso) H3 Smaller than U(eq) C17 by 0.026 Ang**2
RESPONSE: ...
;
_vrf_PLAT360__144830_1
;
PROBLEM: Short C(sp3)-C(sp3) Bond C25 - C26 . 1.34 Ang.
RESPONSE: ...
;
# end Validation Reply Form

```

---

**PLATON version of 04/06/2025; check.def file version of 30/05/2025**

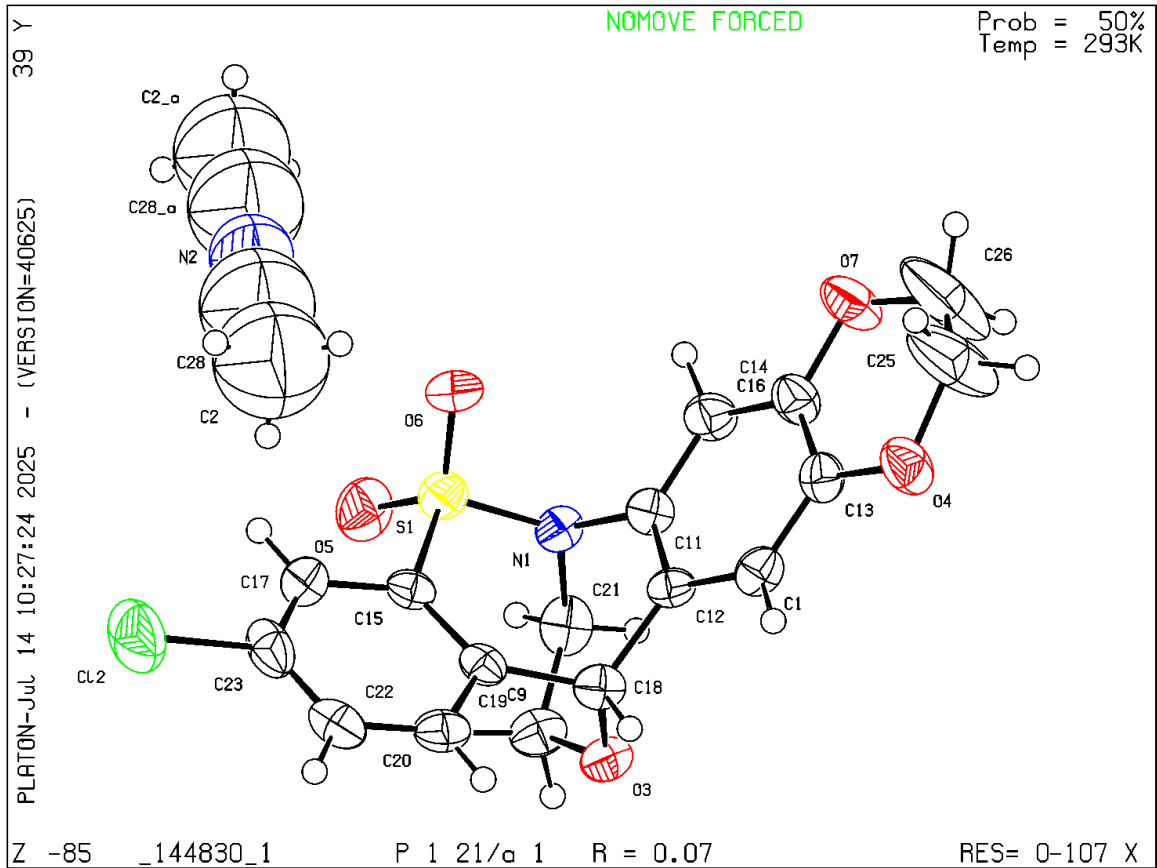

Supplement: Additional file 2 [file compound 27 checkcif.pdf › compound 27 checkcif.pdf]
