# Supplementary material for: Synthesis of new tetra- and pentacyclic, methylenedioxy- and ethylenedioxy-substituted derivatives of the dibenzo[ c , f ][1,2]thiazepine ring system
Source: publisher site journal article supplement (doi:10.3762/bjoc.21.205), 2025-12-09

You have not supplied any structure factors. As a result the full set of tests cannot be run.

No syntax errors found. CIF dictionary Interpreting this report

|                 |                |                    |              |
|-----------------|----------------|--------------------|--------------|
| Bond precision: | C-C = 0.0042 A | Wavelength=1.54187 |              |
| Cell:           | a=10.1431(5)   | b=37.2421(15)      | c=10.4416(5) |
|                 | alpha=90       | beta=105.318(2)    | gamma=90     |
| Temperature:    | 293 K          |                    |              |

```
Correction method= # Reported T Limits: Tmin=0.643 Tmax=0.833
AbsCorr = MULTI-SCAN
```

```
R(reflections)= 0.0424( 15512)      wR2(reflections)=
S = 1.015                          0.0569( 15714)
Npar= 525
```

---

The following ALERTS were generated. Each ALERT has the format

**test-name\_ALERT\_alert-type\_alert-level.**

Click on the hyperlinks for more details of the test.

---

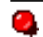

#### **Alert level A**

DIFMN02\_ALERT\_2\_A The minimum difference density is  $< -0.1 \times Z_{MAX} \times 2.00$   
\_refine\_diff\_density\_min given = -8.850  
Test value = -3.400

**Author Response: Although the residual density is out of border but there is no doubt about the chemical structure taking into account other evidences, e.g. NMR. The error maybe due to crystal imperfections.**

PLAT097\_ALERT\_2\_A Large Reported Max. (Positive) Residual Density 4.69 eA-3

**Author Response: Although the residual density is out of border but there is no doubt about the chemical structure taking into account other evidences, e.g. NMR. The error maybe due to crystal imperfections.**

PLAT098\_ALERT\_2\_A Large Reported Min. (Negative) Residual Density -8.85 eA-3

**Author Response: Although the residual density is out of border but there is no doubt about the chemical structure taking into account other evidences, e.g. NMR. The error maybe due to crystal imperfections.**

PLAT703\_ALERT\_1\_A Torsion Calc -170.1(2), Rep -169.4(3), Dev.. 3.50 Sigma  
N(1)-S(1)-C(1)-C(31 1\_555 1\_555 1\_555 1\_555 # 10 Check

**Author Response: The structure is affected by some strain. Crystal imperfections can not be excluded either.**

PLAT703\_ALERT\_1\_A Torsion Calc -44.7(2), Rep -43.7(3), Dev.. 5.00 Sigma  
C(50-N(2)-C(17-C(48 1\_555 1\_555 1\_555 1\_555 # 45 Check

**Author Response: The structure is affected by some strain. Crystal imperfections can not be excluded either.**

PLAT703\_ALERT\_1\_A Torsion Calc -174.02(19), Rep -175.0(3), Dev.. 5.16 Sigma  
C(50-N(2)-C(35-C(29 1\_555 1\_555 1\_555 1\_555 # 47 Check

**Author Response: The structure is affected by some strain. Crystal imperfections can not be excluded either.**

PLAT703\_ALERT\_1\_A Torsion Calc 56.2(2), Rep 55.4(4), Dev.. 4.00 Sigma  
 C(50-N(2)-C(35-C(44 1\_555 1\_555 1\_555 1\_555 # 48 Check

**Author Response: The structure is affected by some strain. Crystal imperfections can not be excluded either.**

PLAT703\_ALERT\_1\_A Torsion Calc 55.5(2), Rep 54.6(5), Dev.. 4.50 Sigma  
 C(45-N(3)-C(28-C(30 1\_555 1\_555 1\_555 1\_555 # 50 Check

**Author Response: The structure is affected by some strain. Crystal imperfections can not be excluded either.**

PLAT703\_ALERT\_1\_A Torsion Calc -176.33(18), Rep -177.1(3), Dev.. 4.28 Sigma  
 C(45-N(3)-C(28-C(42 1\_555 1\_555 1\_555 1\_555 # 51 Check

**Author Response: The structure is affected by some strain. Crystal imperfections can not be excluded either.**

PLAT703\_ALERT\_1\_A Torsion Calc -24.9(3), Rep -23.9(5), Dev.. 3.33 Sigma  
 N(3)-C(45-C(51-C(52 1\_555 1\_555 1\_555 1\_555 # 136 Check

**Author Response: The structure is affected by some strain. Crystal imperfections can not be excluded either.**

PLAT703\_ALERT\_1\_A Torsion Calc -0.8(3), Rep -2.1(5), Dev.. 4.33 Sigma  
 C(45-C(51-C(52-C(46 1\_555 1\_555 1\_555 1\_555 # 140 Check

**Author Response: The structure is affected by some strain. Crystal imperfections can not be excluded either.**

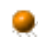

#### **Alert level B**

REFLT02\_ALERT\_1\_B The number of reflections greater than the sigma threshold cannot exceed the number of symmetry-independent reflections

Number of symmetry-independent reflections = 7156

Number of reflections greater than sigma threshold = 15512

PLAT230\_ALERT\_2\_B Hirshfeld Test Diff for S2 --O9 . 7.9 s.u.  
 PLAT230\_ALERT\_2\_B Hirshfeld Test Diff for S2 --O12 . 7.9 s.u.  
 PLAT230\_ALERT\_2\_B Hirshfeld Test Diff for O6 --C37 . 7.7 s.u.  
 PLAT230\_ALERT\_2\_B Hirshfeld Test Diff for N3 --C46 . 7.3 s.u.  
 PLAT230\_ALERT\_2\_B Hirshfeld Test Diff for S1 --O8 . 10.5 s.u.  
 PLAT230\_ALERT\_2\_B Hirshfeld Test Diff for S1 --N1 . 8.3 s.u.  
 PLAT230\_ALERT\_2\_B Hirshfeld Test Diff for O2 --C41 . 8.0 s.u.  
 PLAT230\_ALERT\_2\_B Hirshfeld Test Diff for O2 --C54 . 7.5 s.u.  
 PLAT230\_ALERT\_2\_B Hirshfeld Test Diff for N2 --C17 . 7.7 s.u.  
 PLAT230\_ALERT\_2\_B Hirshfeld Test Diff for C1 --C31 . 7.3 s.u.  
 PLAT703\_ALERT\_1\_B Torsion Calc -176.4(3), Rep -175.7(6), Dev.. 2.33 Sigma  
 C(47-O(3)-C(36-C(25 1\_555 1\_555 1\_555 1\_555 # 29 Check

**Author Response: The structure is affected by some strain. Crystal imperfections can not be excluded either.**

PLAT703\_ALERT\_1\_B Torsion Calc -164.6(2), Rep -165.1(4), Dev.. 2.50 Sigma  
C(28-N(3)-C(46-C(52 1\_555 1\_555 1\_555 1\_555 # 52 Check

**Author Response: The structure is affected by some strain. Crystal imperfections can not be excluded either.**

PLAT703\_ALERT\_1\_B Torsion Calc 172.1(2), Rep 171.6(4), Dev.. 2.50 Sigma  
C(46-N(3)-C(28-C(30 1\_555 1\_555 1\_555 1\_555 # 53 Check

**Author Response: The structure is affected by some strain. Crystal imperfections can not be excluded either.**

PLAT703\_ALERT\_1\_B Torsion Calc 174.6(2), Rep 175.2(4), Dev.. 3.00 Sigma  
S(1)-C(1)-C(29-C(40 1\_555 1\_555 1\_555 1\_555 # 62 Check

**Author Response: The structure is affected by some strain. Crystal imperfections can not be excluded either.**

PLAT703\_ALERT\_1\_B Torsion Calc 179.8(2), Rep -179.7(4), Dev.. 2.50 Sigma  
N(1)-C(2)-C(39-C(26 1\_555 1\_555 1\_555 1\_555 # 67 Check

**Author Response: The structure is affected by some strain. Crystal imperfections can not be excluded either.**

PLAT703\_ALERT\_1\_B Torsion Calc -132.7(2), Rep -133.2(4), Dev.. 2.50 Sigma  
C(40-C(29-C(35-C(44 1\_555 1\_555 1\_555 1\_555 # 113 Check

**Author Response: The structure is affected by some strain. Crystal imperfections can not be excluded either.**

PLAT703\_ALERT\_1\_B Torsion Calc 26.4(3), Rep 27.3(5), Dev.. 3.00 Sigma  
N(3)-C(46-C(52-C(51 1\_555 1\_555 1\_555 1\_555 # 137 Check

**Author Response: The structure is affected by some strain. Crystal imperfections can not be excluded either.**

PLAT703\_ALERT\_1\_B Torsion Calc -29.2(2), Rep -28.7(4), Dev.. 2.50 Sigma  
N(2)-C(50-C(53-C(48 1\_555 1\_555 1\_555 1\_555 # 139 Check

**Author Response: The structure is affected by some strain. Crystal imperfections can not be excluded either.**

---

**Alert level C**

DIFMN03\_ALERT\_1\_C The minimum difference density is < -0.1\*ZMAX\*0.75  
The relevant atom site should be identified.

DIFMX02\_ALERT\_1\_C The maximum difference density is > 0.1\*ZMAX\*0.75  
The relevant atom site should be identified.

PLAT029\_ALERT\_3\_C \_diffrn\_measured\_fraction\_theta\_full value Low . 0.960 Why?

PLAT230\_ALERT\_2\_C Hirshfeld Test Diff for O6 --C47 . 7.0 s.u.

PLAT230\_ALERT\_2\_C Hirshfeld Test Diff for C1 --C29 . 5.7 s.u.

PLAT230\_ALERT\_2\_C Hirshfeld Test Diff for C26 --C41 . 7.0 s.u.

PLAT241\_ALERT\_2\_C High 'MainMol' Ueq as Compared to Neighbors of C54 Check

PLAT242\_ALERT\_2\_C Low 'MainMol' Ueq as Compared to Neighbors of C49 Check

PLAT340\_ALERT\_3\_C Low Bond Precision on C-C Bonds ..... 0.00418 Ang.

PLAT601\_ALERT\_2\_C Unit Cell Contains Solvent Accessible VOIDS <= 32 Ang\*\*3

PLAT703\_ALERT\_1\_C Torsion Calc -101.5(3), Rep -101.9(5), Dev.. 1.33 Sigma  
O(1)-S(1)-C(1)-C(29) 1\_555 1\_555 1\_555 1\_555 # 3 Check

**Author Response: The structure is affected by some strain. Crystal imperfections can not be excluded either.**

PLAT703\_ALERT\_1\_C Torsion Calc 74.0(2), Rep 74.4(4), Dev.. 2.00 Sigma  
O(1)-S(1)-C(1)-C(31) 1\_555 1\_555 1\_555 1\_555 # 4 Check

**Author Response: The structure is affected by some strain. Crystal imperfections can not be excluded either.**

PLAT703\_ALERT\_1\_C Torsion Calc 131.0(3), Rep 130.5(4), Dev.. 1.67 Sigma  
O(8)-S(1)-C(1)-C(29) 1\_555 1\_555 1\_555 1\_555 # 7 Check

**Author Response: The structure is affected by some strain. Crystal imperfections can not be excluded either.**

PLAT703\_ALERT\_1\_C Torsion Calc -53.5(2), Rep -53.2(4), Dev.. 1.50 Sigma  
O(8)-S(1)-C(1)-C(31) 1\_555 1\_555 1\_555 1\_555 # 8 Check

**Author Response: The structure is affected by some strain. Crystal imperfections can not be excluded either.**

PLAT703\_ALERT\_1\_C Torsion Calc -6.0(2), Rep -6.3(3), Dev.. 1.50 Sigma  
O(12)-S(2)-N(4)-C(21) 1\_555 1\_555 1\_555 1\_555 # 17 Check

**Author Response: The structure is affected by some strain. Crystal imperfections can not be excluded either.**

PLAT703\_ALERT\_1\_C Torsion Calc -177.03(17), Rep -176.7(2), Dev.. 1.94 Sigma  
N(4)-S(2)-C(32)-C(23) 1\_555 1\_555 1\_555 1\_555 # 21 Check

**Author Response: The structure is affected by some strain. Crystal imperfections can not be excluded either.**

PLAT703\_ALERT\_1\_C Torsion Calc      8.5(3), Rep      9.0(6), Dev..      1.67 Sigma  
C(37-O(6)-C(47-O(3)    1\_555    1\_555    1\_555    1\_555      #    31 Check

**Author Response: The structure is affected by some strain. Crystal imperfections can not be excluded either.**

PLAT703\_ALERT\_1\_C Torsion Calc      -5.8(4), Rep      -6.4(6), Dev..      1.50 Sigma  
C(47-O(6)-C(37-C(36)    1\_555    1\_555    1\_555    1\_555      #    33 Check

**Author Response: The structure is affected by some strain. Crystal imperfections can not be excluded either.**

PLAT703\_ALERT\_1\_C Torsion Calc      80.9(3), Rep      80.5(5), Dev..      1.33 Sigma  
C(27-N(1)-C(2)-C(39)    1\_555    1\_555    1\_555    1\_555      #    39 Check

**Author Response: The structure is affected by some strain. Crystal imperfections can not be excluded either.**

PLAT703\_ALERT\_1\_C Torsion Calc    163.97(19), Rep      164.3(3), Dev..      1.74 Sigma  
C(28-N(3)-C(45-C(51)    1\_555    1\_555    1\_555    1\_555      #    49 Check

**Author Response: The structure is affected by some strain. Crystal imperfections can not be excluded either.**

PLAT703\_ALERT\_1\_C Torsion Calc    -102.8(3), Rep      -103.4(4), Dev..      2.00 Sigma  
S(2)-N(4)-C(24-C(19)    1\_555    1\_555    1\_555    1\_555      #    57 Check

**Author Response: The structure is affected by some strain. Crystal imperfections can not be excluded either.**

PLAT703\_ALERT\_1\_C Torsion Calc      82.7(3), Rep      82.2(5), Dev..      1.67 Sigma  
C(21-N(4)-C(24-C(19)    1\_555    1\_555    1\_555    1\_555      #    59 Check

**Author Response: The structure is affected by some strain. Crystal imperfections can not be excluded either.**

PLAT703\_ALERT\_1\_C Torsion Calc      -8.8(4), Rep      -8.1(8), Dev..      1.75 Sigma  
S(1)-C(1)-C(29-C(35)    1\_555    1\_555    1\_555    1\_555      #    61 Check

**Author Response: The structure is affected by some strain. Crystal imperfections can not be excluded either.**

PLAT703\_ALERT\_1\_C Torsion Calc      0.3(4), Rep      0.8(8), Dev..      1.25 Sigma  
C(29-C(1)-C(31-C(33    1\_555    1\_555    1\_555    1\_555      #    64 Check

**Author Response: The structure is affected by some strain. Crystal imperfections can not be excluded either.**

PLAT703\_ALERT\_1\_C Torsion Calc      4.1(4), Rep      3.6(6), Dev..      1.25 Sigma  
N(1)-C(2)-C(44-C(35    1\_555    1\_555    1\_555    1\_555      #    69 Check

**Author Response: The structure is affected by some strain. Crystal imperfections can not be excluded either.**

PLAT703\_ALERT\_1\_C Torsion Calc    -176.1(2), Rep    -176.4(4), Dev..      1.50 Sigma  
C(39-C(2)-C(44-C(35    1\_555    1\_555    1\_555    1\_555      #    71 Check

**Author Response: The structure is affected by some strain. Crystal imperfections can not be excluded either.**

PLAT703\_ALERT\_1\_C Torsion Calc    176.6(2), Rep    177.0(4), Dev..      2.00 Sigma  
C(41-C(3)-C(44-C(35    1\_555    1\_555    1\_555    1\_555      #    74 Check

**Author Response: The structure is affected by some strain. Crystal imperfections can not be excluded either.**

PLAT703\_ALERT\_1\_C Torsion Calc    -179.2(3), Rep    -178.8(4), Dev..      1.33 Sigma  
C(44-C(3)-C(41-O(2)    1\_555    1\_555    1\_555    1\_555      #    75 Check

**Author Response: The structure is affected by some strain. Crystal imperfections can not be excluded either.**

PLAT703\_ALERT\_1\_C Torsion Calc    25.7(2), Rep    25.4(3), Dev..      1.50 Sigma  
N(2)-C(17-C(48-C(53    1\_555    1\_555    1\_555    1\_555      #    77 Check

**Author Response: The structure is affected by some strain. Crystal imperfections can not be excluded either.**

PLAT703\_ALERT\_1\_C Torsion Calc    -0.8(5), Rep    0.0(8), Dev..      1.60 Sigma  
C(24-C(19-C(37-C(36    1\_555    1\_555    1\_555    1\_555      #    79 Check

**Author Response: The structure is affected by some strain. Crystal imperfections can not be excluded either.**

PLAT703\_ALERT\_1\_C Torsion Calc    -0.4(4), Rep    -0.9(7), Dev..      1.25 Sigma  
C(37-C(19-C(24-C(30    1\_555    1\_555    1\_555    1\_555      #    81 Check

**Author Response: The structure is affected by some strain. Crystal imperfections can not be excluded either.**

PLAT703\_ALERT\_1\_C Torsion Calc 178.16(19), Rep 177.8(3), Dev.. 1.89 Sigma  
C(32-C(23-C(49-CL(1 1\_555 1\_555 1\_555 1\_555 # 82 Check

**Author Response: The structure is affected by some strain. Crystal imperfections can not be excluded either.**

PLAT703\_ALERT\_1\_C Torsion Calc -0.4(4), Rep 0.2(5), Dev.. 1.50 Sigma  
C(32-C(23-C(49-C(38 1\_555 1\_555 1\_555 1\_555 # 83 Check

**Author Response: The structure is affected by some strain. Crystal imperfections can not be excluded either.**

PLAT703\_ALERT\_1\_C Torsion Calc -176.48(19), Rep -176.8(3), Dev.. 1.68 Sigma  
C(49-C(23-C(32-S(2) 1\_555 1\_555 1\_555 1\_555 # 84 Check

**Author Response: The structure is affected by some strain. Crystal imperfections can not be excluded either.**

PLAT703\_ALERT\_1\_C Torsion Calc 2.5(4), Rep 2.0(7), Dev.. 1.25 Sigma  
N(4)-C(24-C(30-C(28 1\_555 1\_555 1\_555 1\_555 # 87 Check

**Author Response: The structure is affected by some strain. Crystal imperfections can not be excluded either.**

PLAT703\_ALERT\_1\_C Torsion Calc 0.7(4), Rep 1.2(7), Dev.. 1.25 Sigma  
C(19-C(24-C(30-C(25 1\_555 1\_555 1\_555 1\_555 # 88 Check

**Author Response: The structure is affected by some strain. Crystal imperfections can not be excluded either.**

PLAT703\_ALERT\_1\_C Torsion Calc -1.1(5), Rep -0.3(7), Dev.. 1.60 Sigma  
C(30-C(25-C(36-C(37 1\_555 1\_555 1\_555 1\_555 # 91 Check

**Author Response: The structure is affected by some strain. Crystal imperfections can not be excluded either.**

PLAT703\_ALERT\_1\_C Torsion Calc 0.0(4), Rep -0.6(7), Dev.. 1.50 Sigma  
C(36-C(25-C(30-C(24 1\_555 1\_555 1\_555 1\_555 # 92 Check

**Author Response: The structure is affected by some strain. Crystal imperfections can not be excluded either.**



PLAT703\_ALERT\_1\_C Torsion Calc      -0.4(4), Rep      -1.0(6), Dev..      1.50 Sigma  
O(7)-C(26-C(41-O(2)    1\_555    1\_555    1\_555    1\_555      #    95 Check

**Author Response: The structure is affected by some strain. Crystal imperfections can not be excluded either.**

PLAT703\_ALERT\_1\_C Torsion Calc      1.7(5), Rep      2.6(9), Dev..      1.80 Sigma  
C(39-C(26-C(41-C(3)    1\_555    1\_555    1\_555    1\_555      #    98 Check

**Author Response: The structure is affected by some strain. Crystal imperfections can not be excluded either.**

PLAT703\_ALERT\_1\_C Torsion Calc      -1.2(4), Rep      -2.0(8), Dev..      2.00 Sigma  
C(41-C(26-C(39-C(2)    1\_555    1\_555    1\_555    1\_555      #    99 Check

**Author Response: The structure is affected by some strain. Crystal imperfections can not be excluded either.**

PLAT703\_ALERT\_1\_C Torsion Calc      50.7(4), Rep      50.1(7), Dev..      1.50 Sigma  
C(1)-C(29-C(35-C(44    1\_555    1\_555    1\_555    1\_555      #    109 Check

**Author Response: The structure is affected by some strain. Crystal imperfections can not be excluded either.**

PLAT703\_ALERT\_1\_C Torsion Calc      -0.8(5), Rep      -1.4(8), Dev..      1.20 Sigma  
C(1)-C(31-C(33-C(43    1\_555    1\_555    1\_555    1\_555      #    115 Check

**Author Response: The structure is affected by some strain. Crystal imperfections can not be excluded either.**

PLAT703\_ALERT\_1\_C Torsion Calc    176.38(19), Rep      176.6(3), Dev..      1.16 Sigma  
S(2)-C(32-C(42-C(34    1\_555    1\_555    1\_555    1\_555      #    117 Check

**Author Response: The structure is affected by some strain. Crystal imperfections can not be excluded either.**

PLAT703\_ALERT\_1\_C Torsion Calc    179.4(2), Rep      179.1(3), Dev..      1.50 Sigma  
C(38-C(34-C(42-C(28    1\_555    1\_555    1\_555    1\_555      #    122 Check

**Author Response: The structure is affected by some strain. Crystal imperfections can not be excluded either.**

PLAT703\_ALERT\_1\_C Torsion Calc      -0.4(4), Rep      0.3(6), Dev..      1.75 Sigma  
C(42-C(34-C(38-C(49    1\_555    1\_555    1\_555    1\_555      #    124 Check

**Author Response: The structure is affected by some strain. Crystal imperfections can not be excluded either.**

PLAT703\_ALERT\_1\_C Torsion Calc -67.3(3), Rep -66.7(5), Dev.. 2.00 Sigma  
C(29-C(35-C(44-C(2) 1\_555 1\_555 1\_555 1\_555 # 127 Check

**Author Response: The structure is affected by some strain. Crystal imperfections can not be excluded either.**

PLAT703\_ALERT\_1\_C Torsion Calc 1.1(4), Rep 1.7(7), Dev.. 1.50 Sigma  
O(3)-C(36-C(37-O(6) 1\_555 1\_555 1\_555 1\_555 # 129 Check

**Author Response: The structure is affected by some strain. Crystal imperfections can not be excluded either.**

PLAT703\_ALERT\_1\_C Torsion Calc 1.5(6), Rep 0.6(9), Dev.. 1.50 Sigma  
C(25-C(36-C(37-C(19 1\_555 1\_555 1\_555 1\_555 # 132 Check

**Author Response: The structure is affected by some strain. Crystal imperfections can not be excluded either.**

PLAT703\_ALERT\_1\_C Torsion Calc 1.1(4), Rep 0.3(6), Dev.. 2.00 Sigma  
C(34-C(38-C(49-C(23 1\_555 1\_555 1\_555 1\_555 # 134 Check

**Author Response: The structure is affected by some strain. Crystal imperfections can not be excluded either.**

PLAT790\_ALERT\_4\_C Centre of Gravity not Within Unit Cell: Resd. # 1 Note  
C19 H19 Cl N2 O4 S

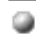

#### Alert level G

|                                                                    |              |
|--------------------------------------------------------------------|--------------|
| PLAT005_ALERT_5_G No Embedded Refinement Details Found in the CIF  | Please Do !  |
| PLAT128_ALERT_4_G Alternate Setting for Input Space Group P21/a    | P21/c Note   |
| PLAT199_ALERT_1_G Reported _cell_measurement_temperature ..... (K) | 293 Check    |
| PLAT200_ALERT_1_G Reported _diffn_ambient_temperature ..... (K)    | 293 Check    |
| PLAT398_ALERT_2_G Deviating C-O-C Angle From 120 for O3 .          | 104.6 Degree |
| PLAT398_ALERT_2_G Deviating C-O-C Angle From 120 for O6 .          | 104.5 Degree |
| PLAT398_ALERT_2_G Deviating C-O-C Angle From 120 for O2 .          | 103.5 Degree |
| PLAT398_ALERT_2_G Deviating C-O-C Angle From 120 for O7 .          | 105.2 Degree |
| PLAT793_ALERT_4_G Model has Chirality at C28 (Centro SpGr)         | R Verify     |
| PLAT793_ALERT_4_G Model has Chirality at C35 (Centro SpGr)         | S Verify     |
| PLAT808_ALERT_5_G No Parseable SHELXL Style Weighting Scheme Found | Please Check |
| PLAT882_ALERT_1_G No Datum for _diffn_reflms_av_unetI/netI .....   | Please Do !  |
| PLAT883_ALERT_1_G Absent Datum for _atom_sites_solution_primary .. | Please Do !  |

11 **ALERT level A** = Most likely a serious problem - resolve or explain

19 **ALERT level B** = A potentially serious problem, consider carefully

51 **ALERT level C** = Check. Ensure it is not caused by an omission or oversight  
 13 **ALERT level G** = General information/check it is not something unexpected

63 ALERT type 1 CIF construction/syntax error, inconsistent or missing data  
 23 ALERT type 2 Indicator that the structure model may be wrong or deficient  
 2 ALERT type 3 Indicator that the structure quality may be low  
 4 ALERT type 4 Improvement, methodology, query or suggestion  
 2 ALERT type 5 Informative message, check

---

It is advisable to attempt to resolve as many as possible of the alerts in all categories. Often the minor alerts point to easily fixed oversights, errors and omissions in your CIF or refinement strategy, so attention to these fine details can be worthwhile. In order to resolve some of the more serious problems it may be necessary to carry out additional measurements or structure refinements. However, the purpose of your study may justify the reported deviations and the more serious of these should normally be commented upon in the discussion or experimental section of a paper or in the "special\_details" fields of the CIF. checkCIF was carefully designed to identify outliers and unusual parameters, but every test has its limitations and alerts that are not important in a particular case may appear. Conversely, the absence of alerts does not guarantee there are no aspects of the results needing attention. It is up to the individual to critically assess their own results and, if necessary, seek expert advice.

### Publication of your CIF in IUCr journals

A basic structural check has been run on your CIF. These basic checks will be run on all CIFs submitted for publication in IUCr journals (*Acta Crystallographica*, *Journal of Applied Crystallography*, *Journal of Synchrotron Radiation*); however, if you intend to submit to *Acta Crystallographica Section C* or *E* or *IUCrData*, you should make sure that full publication checks are run on the final version of your CIF prior to submission.

### Publication of your CIF in other journals

Please refer to the *Notes for Authors* of the relevant journal for any special instructions relating to CIF submission.

### Validation response form

Please find below a validation response form (VRF) that can be filled in and pasted into your CIF.

```
# start Validation Reply Form
_vrf_REFLT02__143750_1
;
PROBLEM: The number of reflections greater than the sigma threshold
RESPONSE: ...
;
_vrf_DIFMN03__143750_1
;
PROBLEM: The minimum difference density is < -0.1*ZMAX*0.75
RESPONSE: ...
;
_vrf_DIFMX02__143750_1
```

```

;
PROBLEM: The maximum difference density is > 0.1*ZMAX*0.75
RESPONSE: ...
;
_vrf_PLAT230__143750_1
;
PROBLEM: Hirshfeld Test Diff for      S2      --O9      .      7.9 s.u.
RESPONSE: ...
;
_vrf_PLAT029__143750_1
;
PROBLEM: _diffn_measured_fraction_theta_full value Low .      0.960 Why?
RESPONSE: ...
;
_vrf_PLAT241__143750_1
;
PROBLEM: High      'MainMol' Ueq as Compared to Neighbors of      C54 Check
RESPONSE: ...
;
_vrf_PLAT242__143750_1
;
PROBLEM: Low      'MainMol' Ueq as Compared to Neighbors of      C49 Check
RESPONSE: ...
;
_vrf_PLAT340__143750_1
;
PROBLEM: Low Bond Precision on  C-C Bonds .....      0.00418 Ang.
RESPONSE: ...
;
_vrf_PLAT601__143750_1
;
PROBLEM: Unit Cell Contains Solvent Accessible VOIDS      <=      32 Ang**3
RESPONSE: ...
;
_vrf_PLAT790__143750_1
;
PROBLEM: Centre of Gravity not Within Unit Cell: Resd.  #      1 Note
RESPONSE: ...
;
# end Validation Reply Form

```

---

**PLATON version of 04/06/2025; check.def file version of 30/05/2025**

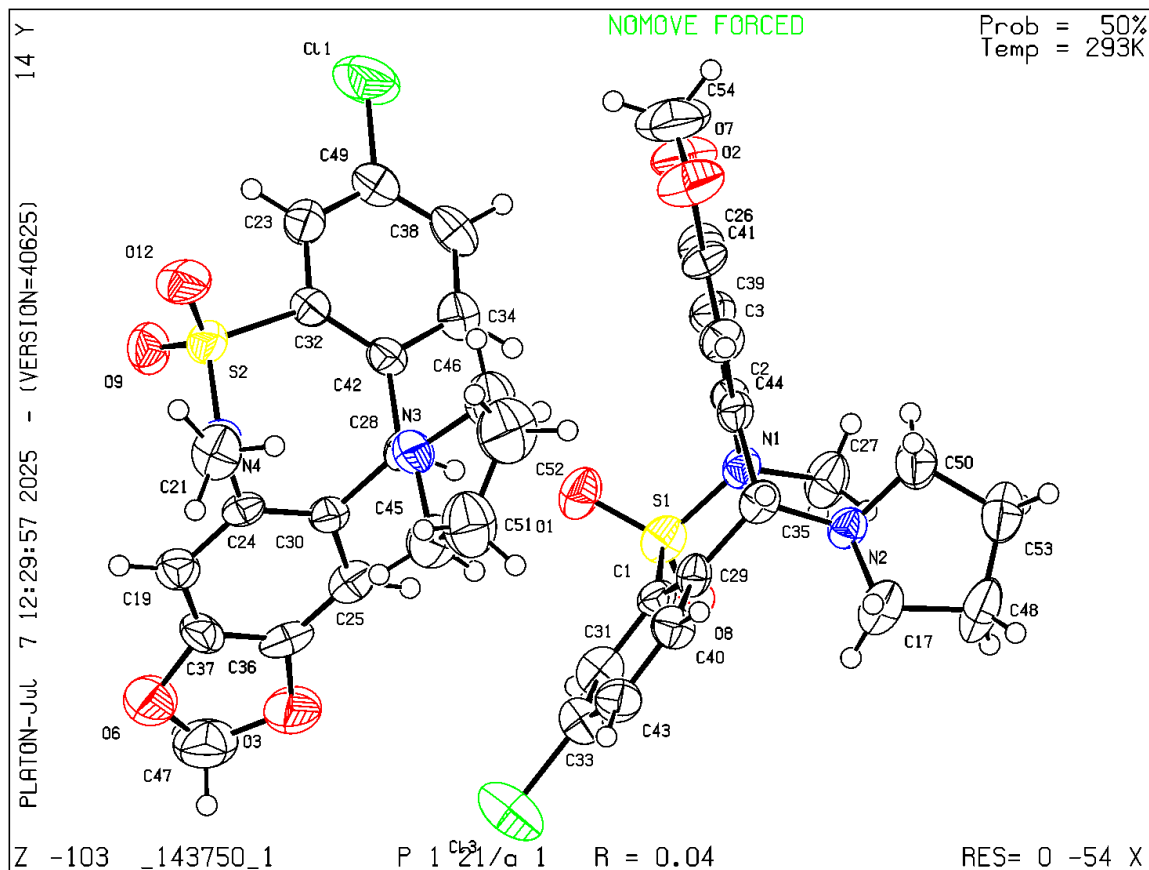

Supplement: Additional file 2 [file compound 20e checkcif.pdf › compound 20e checkcif.pdf]
