# Supplementary material for: Synthesis of new tetra- and pentacyclic, methylenedioxy- and ethylenedioxy-substituted derivatives of the dibenzo[ c , f ][1,2]thiazepine ring system
Source: publisher site journal article supplement (doi:10.3762/bjoc.21.205), 2025-12-09
Supplement: Additional file 2 [file compound 20e structure report.pdf › compound 20e structure report.pdf]

**143750**

**1807-BGE**

Submitted by: Berecz Gabor  
Operator: Dancso Andras

X-ray Structure Report

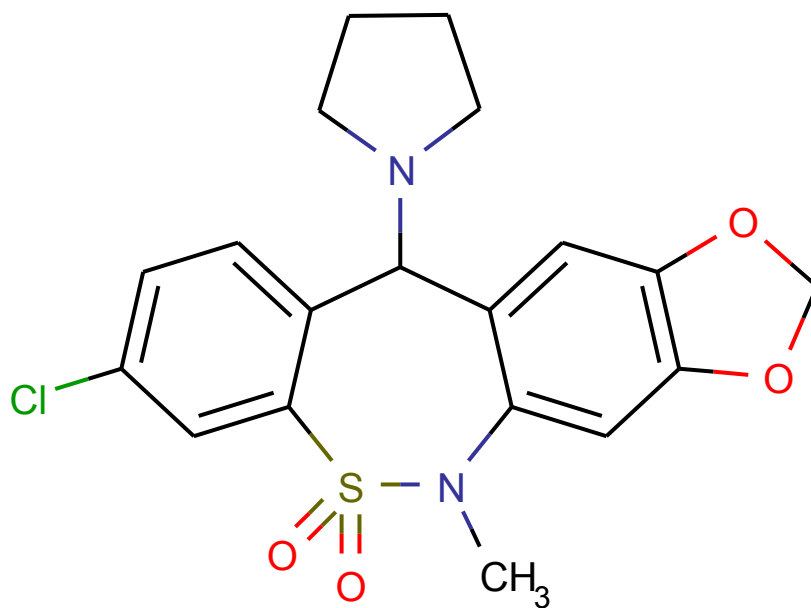

October 24, 2024

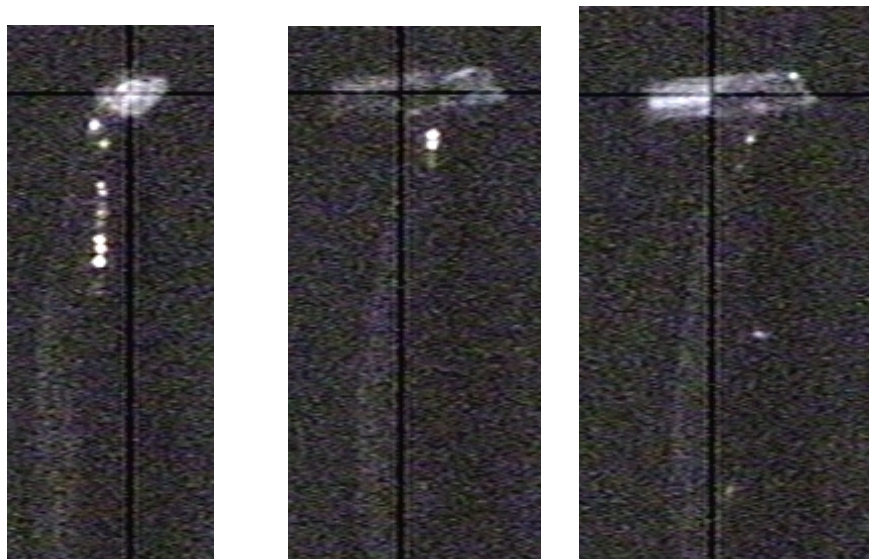

Fig. 1. The crystal

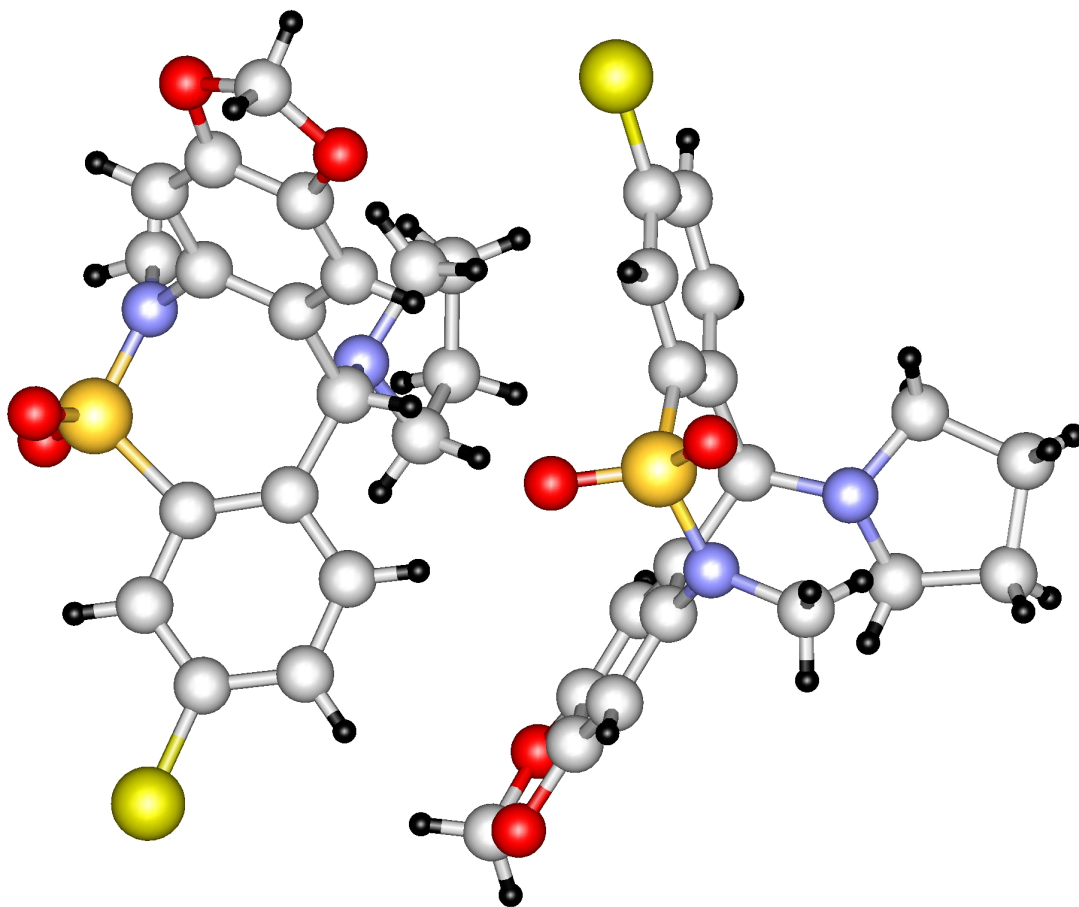

Fig 2. Molecules in pair (hydrogens were generated by the software)

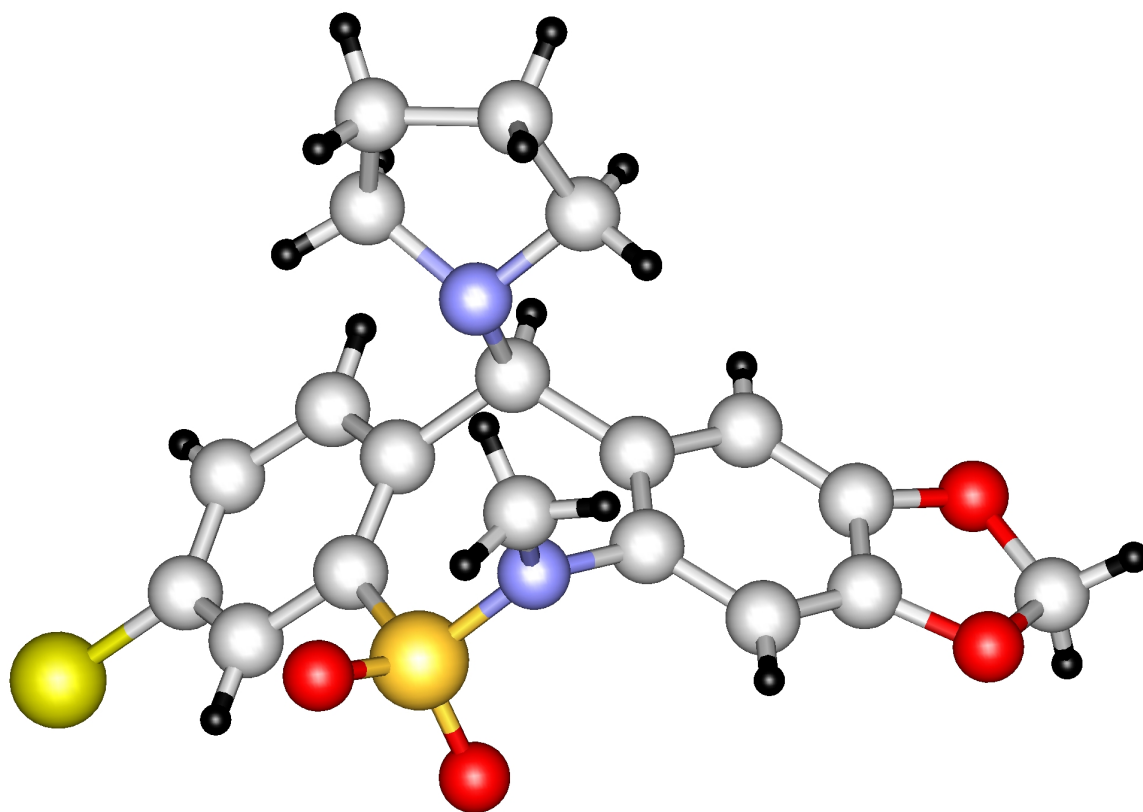

Fig. 3. Fragment 1

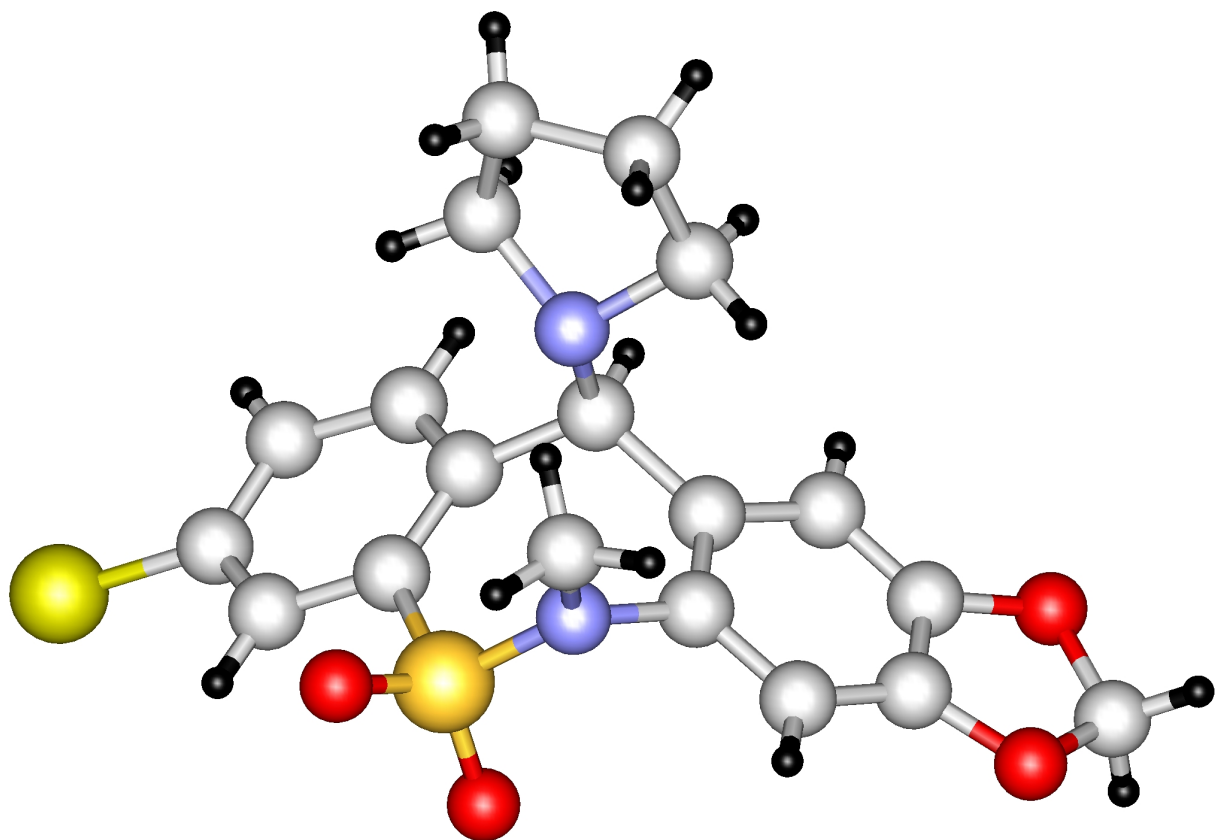

Fig. 4. Fragment 2

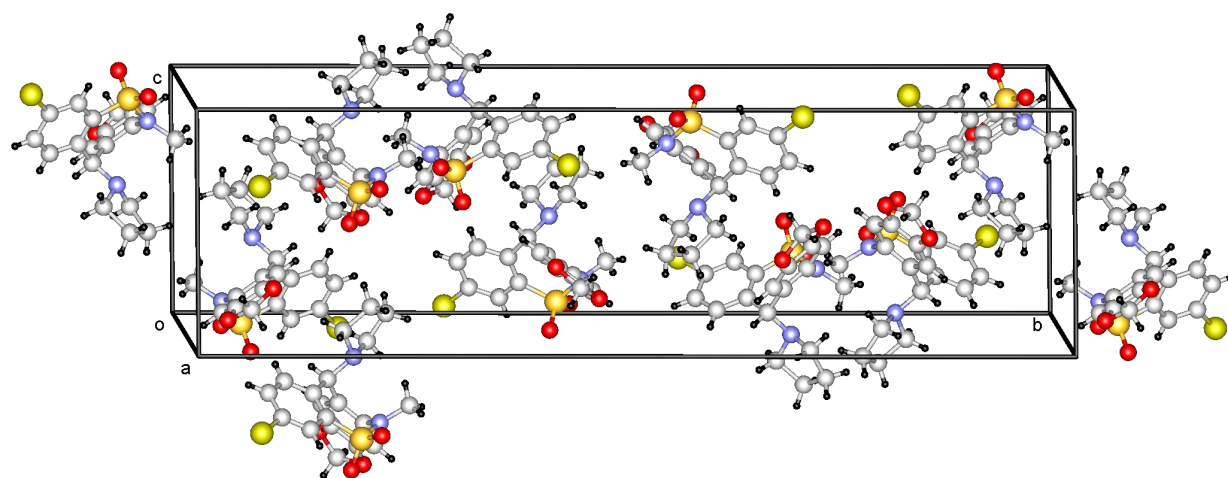

Fig. 5. Packing

## *Experimental*

### Data Collection

A colorless prism crystal of  $C_{19}H_{19}ClN_2O_4S$  having approximate dimensions of 0.25 x 0.11 x 0.06 mm was mounted on a cactus needle. All measurements were made on a Rigaku RAXIS RAPID imaging plate area detector with graphite monochromated Cu-K $\alpha$  radiation.

Indexing was performed from 4 oscillations that were exposed for 600 seconds. The crystal-to-detector distance was 127.40 mm.

Cell constants and an orientation matrix for data collection corresponded to a primitive monoclinic cell with dimensions:

$$\begin{aligned}a &= 10.1431(5) \text{ \AA} \\b &= 37.2421(15) \text{ \AA} \quad \beta = 105.318(2)^\circ \\c &= 10.4416(5) \text{ \AA} \\V &= 3804.2(3) \text{ \AA}^3\end{aligned}$$

For  $Z = 8$  and F.W. = 406.88, the calculated density is 1.421 g/cm<sup>3</sup>. The systematic absences of:

$$\begin{aligned}h0l: h \pm 2n \\0k0: k \pm 2n\end{aligned}$$

uniquely determine the space group to be:

$$P2_1/a \text{ (\#14)}$$

The data were collected at a temperature of  $20 \pm 1^\circ\text{C}$  to a maximum  $2\theta$  value of  $143.5^\circ$ . A total of 180 oscillation images were collected. A sweep of data was done using  $\omega$  scans from  $20.0$  to  $200.0^\circ$  in  $5.0^\circ$  step, at  $\chi=0.0^\circ$  and  $\phi = 0.0^\circ$ . The exposure rate was 120.0 [sec./ $^\circ$ ]. A second sweep was performed using  $\omega$  scans from  $20.0$  to  $200.0^\circ$  in  $5.0^\circ$  step, at  $\chi=54.0^\circ$  and  $\phi = 0.0^\circ$ . The exposure rate was 120.0 [sec./ $^\circ$ ]. Another sweep was performed using  $\omega$  scans from  $20.0$  to  $200.0^\circ$  in  $5.0^\circ$  step, at  $\chi=54.0^\circ$  and  $\phi = 90.0^\circ$ . The exposure rate was 120.0 [sec./ $^\circ$ ]. Another sweep was performed using  $\omega$  scans from  $20.0$  to  $200.0^\circ$  in  $5.0^\circ$  step, at  $\chi=54.0^\circ$  and  $\phi = 180.0^\circ$ . The exposure rate was 120.0 [sec./ $^\circ$ ]. Another sweep was performed using  $\omega$  scans from  $20.0$  to  $200.0^\circ$  in  $5.0^\circ$  step, at  $\chi=54.0^\circ$  and  $\phi = 270.0^\circ$ . The exposure rate was 120.0 [sec./ $^\circ$ ]. The crystal-to-detector distance was 127.40 mm. Readout was performed in the 0.100 mm pixel mode.

## Data Reduction

Of the 43646 reflections that were collected, 7156 were unique ( $R_{\text{int}} = 0.119$ ).

The linear absorption coefficient,  $\mu$ , for Cu-K $\alpha$  radiation is 30.484 cm<sup>-1</sup>. An empirical absorption correction was applied which resulted in transmission factors ranging from 0.643 to 0.833. The data were corrected for Lorentz and polarization effects.

## Structure Solution and Refinement

The structure was solved by direct methods<sup>1</sup> and expanded using Fourier techniques<sup>2</sup>. The non-hydrogen atoms were refined anisotropically. Hydrogen atoms were refined using the riding model. The final cycle of full-matrix least-squares refinement<sup>3</sup> on F was based on 15714 observed reflections ( $I > 2.00\sigma(I)$ ) and 525 variable parameters and converged (largest parameter shift was 0.00 times its esd) with unweighted and weighted agreement factors of:

$$R = \Sigma ||F_o| - |F_c|| / \Sigma |F_o| = 0.0455$$

$$R_w = [ \Sigma w (|F_o| - |F_c|)^2 / \Sigma w F_o^2 ]^{1/2} = 0.0576$$

The standard deviation of an observation of unit weight<sup>4</sup> was 2.03. Unit weights were used. Plots of  $\Sigma w (|F_o| - |F_c|)^2$  versus  $|F_o|$ , reflection order in data collection,  $\sin \theta/\lambda$  and various classes of indices showed no unusual trends. The maximum and minimum peaks on the final difference Fourier map corresponded to 4.69 and -8.85 e<sup>-</sup>/Å<sup>3</sup>, respectively.

Neutral atom scattering factors were taken from Cromer and Waber<sup>5</sup>. Anomalous dispersion effects were included in Fcalc<sup>6</sup>; the values for  $\Delta f'$  and  $\Delta f''$  were those of Creagh and McAuley<sup>7</sup>. The values for the mass attenuation coefficients are those of Creagh and Hubbell<sup>8</sup>. All calculations were performed using the CrystalStructure<sup>9,10</sup> crystallographic software package.

## *References*

- (1) SIR92: Altomare, A., Cascarano, G., Giacovazzo, C., Guagliardi, A., Burla, M., Polidori, G., and Camalli, M. (1994) J. Appl. Cryst., 27, 435.
- (2) DIRDIF99: Beurskens, P.T., Admiraal, G., Beurskens, G., Bosman, W.P., de Gelder, R., Israel, R. and Smits, J.M.M.(1999). The DIRDIF-99 program system, Technical Report of the Crystallography Laboratory, University of Nijmegen, The Netherlands.



(3) Least Squares function minimized:

$$\sum w(|F_o| - |F_c|)^2 \quad \text{where } w = \text{Least Squares weights.}$$

(4) Standard deviation of an observation of unit weight:

$$[\sum w(|F_o| - |F_c|)^2 / (N_o - N_v)]^{1/2}$$

where:  $N_o$  = number of observations

$N_v$  = number of variables

(5) Cromer, D. T. & Waber, J. T.; "International Tables for X-ray Crystallography", Vol. IV, The Kynoch Press, Birmingham, England, Table 2.2 A (1974).

(6) Ibers, J. A. & Hamilton, W. C.; Acta Crystallogr., 17, 781 (1964).

(7) Creagh, D. C. & McAuley, W.J. .; "International Tables for Crystallography", Vol C, (A.J.C. Wilson, ed.), Kluwer Academic Publishers, Boston, Table 4.2.6.8, pages 219-222 (1992).

(8) Creagh, D. C. & Hubbell, J.H.; "International Tables for Crystallography", Vol C, (A.J.C. Wilson, ed.), Kluwer Academic Publishers, Boston, Table 4.2.4.3, pages 200-206 (1992).

(9) CrystalStructure 3.7.0: Crystal Structure Analysis Package, Rigaku and Rigaku/MSK (2000-2005). 9009 New Trails Dr. The Woodlands TX 77381 USA.

(10) CRYSTALS Issue 10: Watkin, D.J., Prout, C.K. Carruthers, J.R. & Betteridge, P.W. Chemical Crystallography Laboratory, Oxford, UK. (1996)

## EXPERIMENTAL DETAILS

### A. Crystal Data

|                         |                                                                                                                                                              |
|-------------------------|--------------------------------------------------------------------------------------------------------------------------------------------------------------|
| Empirical Formula       | $\text{C}_{19}\text{H}_{19}\text{ClN}_2\text{O}_4\text{S}$                                                                                                   |
| Formula Weight          | 406.88                                                                                                                                                       |
| Crystal Color, Habit    | colorless, prism                                                                                                                                             |
| Crystal Dimensions      | 0.25 X 0.11 X 0.06 mm                                                                                                                                        |
| Crystal System          | monoclinic                                                                                                                                                   |
| Lattice Type            | Primitive                                                                                                                                                    |
| Indexing Images         | 4 oscillations @ 600.0 seconds                                                                                                                               |
| Detector Position       | 127.40 mm                                                                                                                                                    |
| Pixel Size              | 0.100 mm                                                                                                                                                     |
| Lattice Parameters      | $a = 10.1431(5) \text{ \AA}$<br>$b = 37.2421(15) \text{ \AA}$<br>$c = 10.4416(5) \text{ \AA}$<br>$\beta = 105.318(2)^\circ$<br>$V = 3804.2(3) \text{ \AA}^3$ |
| Space Group             | $P2_1/a$ (#14)                                                                                                                                               |
| Z value                 | 8                                                                                                                                                            |
| D <sub>calc</sub>       | 1.421 g/cm <sup>3</sup>                                                                                                                                      |
| F <sub>000</sub>        | 1696.00                                                                                                                                                      |
| $\mu(\text{CuK}\alpha)$ | 30.484 cm <sup>-1</sup>                                                                                                                                      |

## B. Intensity Measurements

|                                                           |                                                                       |
|-----------------------------------------------------------|-----------------------------------------------------------------------|
| Diffractometer                                            | Rigaku RAXIS-RAPID                                                    |
| Radiation                                                 | CuK $\alpha$ ( $\lambda$ = 1.54187 Å)<br>graphite monochromated       |
| Detector Aperture                                         | 280 mm x 256 mm                                                       |
| Data Images                                               | 180 exposures                                                         |
| $\omega$ oscillation Range ( $\chi$ =0.0, $\phi$ =0.0)    | 20.0 - 200.0°                                                         |
| Exposure Rate                                             | 120.0 sec./°                                                          |
| $\omega$ oscillation Range ( $\chi$ =54.0, $\phi$ =0.0)   | 20.0 - 200.0°                                                         |
| Exposure Rate                                             | 120.0 sec./°                                                          |
| $\omega$ oscillation Range ( $\chi$ =54.0, $\phi$ =90.0)  | 20.0 - 200.0°                                                         |
| Exposure Rate                                             | 120.0 sec./°                                                          |
| $\omega$ oscillation Range ( $\chi$ =54.0, $\phi$ =180.0) | 20.0 - 200.0°                                                         |
| Exposure Rate                                             | 120.0 sec./°                                                          |
| $\omega$ oscillation Range ( $\chi$ =54.0, $\phi$ =270.0) | 20.0 - 200.0°                                                         |
| Exposure Rate                                             | 120.0 sec./°                                                          |
| Detector Position                                         | 127.40 mm                                                             |
| Pixel Size                                                | 0.100 mm                                                              |
| $2\theta_{\text{max}}$                                    | 143.5°                                                                |
| No. of Reflections Measured                               | Total: 43646<br>Unique: 7156 ( $R_{\text{int}}$ = 0.119)              |
| Corrections                                               | Lorentz-polarization<br>Absorption<br>(trans. factors: 0.643 - 0.833) |

### C. Structure Solution and Refinement

|                                          |                                |
|------------------------------------------|--------------------------------|
| Structure Solution                       | Direct Methods (SIR92)         |
| Refinement                               | Full-matrix least-squares on F |
| Function Minimized                       | $\Sigma w ( Fo  -  Fc )^2$     |
| Least Squares Weights                    | 1                              |
| $2\theta_{\text{max}}$ cutoff            | 143.5 $^{\circ}$               |
| Anomalous Dispersion                     | All non-hydrogen atoms         |
| No. Observations ( $I > 2.00\sigma(I)$ ) | 15714                          |
| No. Variables                            | 525                            |
| Reflection/Parameter Ratio               | 29.93                          |
| Residuals: R ( $I > 2.00\sigma(I)$ )     | 0.0455                         |
| Residuals: Rw ( $I > 2.00\sigma(I)$ )    | 0.0576                         |
| Goodness of Fit Indicator                | 2.031                          |
| Max Shift/Error in Final Cycle           | 0.000                          |
| Maximum peak in Final Diff. Map          | 4.69 e $^{-}/\text{\AA}^3$     |
| Minimum peak in Final Diff. Map          | -8.85 e $^{-}/\text{\AA}^3$    |

Table 1. Atomic coordinates and B<sub>iso</sub>/B<sub>eq</sub>

| atom  | x           | y           | z            | B <sub>eq</sub> |
|-------|-------------|-------------|--------------|-----------------|
| Cl(1) | 1.15574(13) | 0.06651(3)  | -0.28480(12) | 7.24(4)         |
| Cl(3) | 0.20683(12) | 0.18224(3)  | -0.02369(12) | 6.75(4)         |
| S(1)  | 0.49955(16) | 0.06258(3)  | 0.04616(12)  | 3.56(3)         |
| S(2)  | 0.88198(14) | 0.18849(3)  | -0.35538(13) | 3.54(3)         |
| O(1)  | 0.5610(2)   | 0.07219(6)  | -0.0588(2)   | 4.13(8)         |
| O(2)  | 1.1430(4)   | 0.08156(10) | 0.2996(3)    | 6.64(13)        |
| O(3)  | 0.2455(4)   | 0.15885(9)  | -0.4375(4)   | 5.99(12)        |
| O(6)  | 0.2923(4)   | 0.20690(9)  | -0.5626(3)   | 5.49(12)        |
| O(7)  | 1.0869(5)   | 0.03088(10) | 0.1617(3)    | 6.63(13)        |
| O(8)  | 0.3705(2)   | 0.04407(6)  | 0.0135(2)    | 4.10(9)         |
| O(9)  | 0.8281(2)   | 0.17792(6)  | -0.4919(2)   | 4.40(8)         |
| O(12) | 1.0087(2)   | 0.20777(6)  | -0.3204(2)   | 4.90(9)         |
| N(1)  | 0.6059(4)   | 0.03835(9)  | 0.1538(3)    | 3.05(11)        |
| N(2)  | 0.6132(3)   | 0.07353(9)  | 0.4132(3)    | 2.91(10)        |
| N(3)  | 0.7716(4)   | 0.18314(10) | -0.0423(3)   | 3.45(11)        |
| N(4)  | 0.7711(4)   | 0.21244(9)  | -0.3087(3)   | 2.88(10)        |
| C(1)  | 0.4765(5)   | 0.10463(11) | 0.1204(4)    | 2.77(13)        |
| C(2)  | 0.7445(5)   | 0.05099(12) | 0.1963(4)    | 3.10(15)        |
| C(3)  | 0.9123(6)   | 0.09294(12) | 0.3186(4)    | 3.81(15)        |
| C(17) | 0.5266(4)   | 0.09144(11) | 0.4875(4)    | 4.44(15)        |
| C(19) | 0.5333(5)   | 0.21248(12) | -0.4425(4)   | 3.53(15)        |
| C(21) | 0.8077(3)   | 0.24526(9)  | -0.2319(3)   | 4.15(13)        |
| C(23) | 1.0062(4)   | 0.12638(12) | -0.2957(4)   | 3.58(14)        |
| C(24) | 0.6344(5)   | 0.19802(12) | -0.3358(5)   | 2.87(14)        |
| C(25) | 0.4760(5)   | 0.15504(12) | -0.2859(5)   | 3.68(16)        |
| C(26) | 0.9709(7)   | 0.04383(17) | 0.1902(5)    | 4.7(2)          |
| C(27) | 0.5625(4)   | 0.00770(10) | 0.2201(3)    | 4.44(14)        |
| C(28) | 0.7160(4)   | 0.15500(11) | -0.1414(4)   | 2.82(13)        |
| C(29) | 0.5567(5)   | 0.11855(12) | 0.2372(4)    | 2.77(13)        |
| C(30) | 0.6075(5)   | 0.17011(12) | -0.2575(4)   | 2.86(13)        |
| C(31) | 0.3684(4)   | 0.12387(12) | 0.0403(4)    | 3.76(15)        |
| C(32) | 0.9057(5)   | 0.14719(10) | -0.2644(4)   | 2.77(13)        |
| C(33) | 0.3411(4)   | 0.15758(13) | 0.0762(5)    | 3.96(15)        |
| C(34) | 0.8620(5)   | 0.10117(12) | -0.1258(4)   | 4.23(15)        |
| C(35) | 0.6701(4)   | 0.09960(11) | 0.3355(4)    | 2.99(13)        |
| C(36) | 0.3795(6)   | 0.16905(14) | -0.3900(5)   | 3.72(17)        |
| C(37) | 0.4082(6)   | 0.19718(14) | -0.4655(5)   | 3.64(16)        |

Table 1. Atomic coordinates and  $B_{\text{iso}}/B_{\text{eq}}$  (continued)

| atom  | x         | y           | z          | $B_{\text{eq}}$ |
|-------|-----------|-------------|------------|-----------------|
| C(38) | 0.9628(5) | 0.08027(12) | -0.1557(4) | 4.58(16)        |
| C(39) | 0.8402(6) | 0.03186(12) | 0.1492(4)  | 4.15(16)        |
| C(40) | 0.5260(4) | 0.15255(12) | 0.2702(4)  | 3.41(14)        |
| C(41) | 1.0047(6) | 0.07416(18) | 0.2710(5)  | 4.48(19)        |
| C(42) | 0.8302(4) | 0.13501(12) | -0.1807(4) | 3.10(13)        |
| C(43) | 0.4184(5) | 0.17245(12) | 0.1933(5)  | 3.93(16)        |
| C(44) | 0.7769(5) | 0.08108(12) | 0.2807(4)  | 3.13(14)        |
| C(45) | 0.6643(4) | 0.20177(12) | 0.0029(4)  | 4.95(16)        |
| C(46) | 0.8621(5) | 0.16860(12) | 0.0800(5)  | 5.97(17)        |
| C(47) | 0.1935(5) | 0.18003(18) | -0.5519(5) | 6.7(2)          |
| C(48) | 0.5101(5) | 0.06238(12) | 0.5892(4)  | 5.92(17)        |
| C(49) | 1.0343(5) | 0.09335(13) | -0.2418(4) | 3.91(15)        |
| C(50) | 0.7180(4) | 0.05602(11) | 0.5200(4)  | 4.41(15)        |
| C(51) | 0.7421(5) | 0.22114(13) | 0.1288(5)  | 6.42(19)        |
| C(52) | 0.8744(5) | 0.20019(16) | 0.1790(4)  | 7.4(2)          |
| C(53) | 0.6368(5) | 0.03834(12) | 0.6079(4)  | 5.30(17)        |
| C(54) | 1.1913(6) | 0.0550(2)   | 0.2232(6)  | 8.4(2)          |
| H(1)  | 0.9397    | 0.1129      | 0.3760     | 4.63            |
| H(2)  | 0.5522    | 0.2317      | -0.4947    | 4.28            |
| H(3)  | 1.0567    | 0.1354      | -0.3536    | 4.39            |
| H(4)  | 0.4542    | 0.1362      | -0.2338    | 4.56            |
| H(5)  | 0.3134    | 0.1136      | -0.0392    | 4.53            |
| H(6)  | 0.9836    | 0.0569      | -0.1194    | 5.09            |
| H(7)  | 0.8151    | 0.0115      | 0.0932     | 5.10            |
| H(8)  | 0.5811    | 0.1623      | 0.3507     | 3.97            |
| H(9)  | 0.3970    | 0.1957      | 0.2195     | 5.05            |
| H(10) | 0.6726    | 0.1379      | -0.0989    | 3.46            |
| H(11) | 0.7163    | 0.1174      | 0.3962     | 3.76            |
| H(12) | 0.5683    | 0.1125      | 0.5316     | 5.65            |
| H(13) | 0.4413    | 0.0975      | 0.4278     | 5.64            |
| H(14) | 0.6180    | 0.2182      | -0.0635    | 5.93            |
| H(15) | 0.6004    | 0.1852      | 0.0214     | 5.92            |
| H(16) | 0.8245    | 0.1480      | 0.1111     | 7.10            |
| H(17) | 0.9482    | 0.1626      | 0.0658     | 7.09            |
| H(18) | 0.1726    | 0.1653      | -0.6289    | 8.00            |
| H(19) | 0.1127    | 0.1917      | -0.5441    | 7.99            |
| H(20) | 0.5056    | 0.0727      | 0.6711     | 7.63            |

Table 1. Atomic coordinates and  $B_{\text{iso}}/B_{\text{eq}}$  (continued)

| atom  | x      | y       | z       | $B_{\text{eq}}$ |
|-------|--------|---------|---------|-----------------|
| H(21) | 0.4301 | 0.0486  | 0.5535  | 7.63            |
| H(22) | 0.7656 | 0.0385  | 0.4832  | 5.14            |
| H(23) | 0.7812 | 0.0731  | 0.5690  | 5.13            |
| H(24) | 0.7599 | 0.2453  | 0.1089  | 7.53            |
| H(25) | 0.6923 | 0.2209  | 0.1942  | 7.51            |
| H(26) | 0.8848 | 0.1922  | 0.2676  | 8.56            |
| H(27) | 0.9496 | 0.2150  | 0.1756  | 8.57            |
| H(28) | 0.6867 | 0.0381  | 0.6987  | 6.44            |
| H(29) | 0.6123 | 0.0145  | 0.5791  | 6.45            |
| H(30) | 1.2209 | 0.0672  | 0.1559  | 10.38           |
| H(31) | 1.2660 | 0.0423  | 0.2788  | 10.38           |
| H(32) | 0.8311 | 0.2398  | -0.1398 | 4.98            |
| H(33) | 0.7323 | 0.2613  | -0.2524 | 4.99            |
| H(34) | 0.8836 | 0.2561  | -0.2537 | 4.98            |
| H(35) | 0.5410 | 0.0152  | 0.2992  | 5.64            |
| H(36) | 0.6340 | -0.0095 | 0.2411  | 5.65            |
| H(37) | 0.4839 | -0.0027 | 0.1614  | 5.65            |
| H(38) | 0.8139 | 0.0924  | -0.0656 | 5.10            |

$$B_{\text{eq}} = 8/3 \pi^2 (U_{11}(aa^*)^2 + U_{22}(bb^*)^2 + U_{33}(cc^*)^2 + 2U_{12}(aa^*bb^*)\cos \gamma + 2U_{13}(aa^*cc^*)\cos \beta + 2U_{23}(bb^*cc^*)\cos \alpha)$$

Table 2. Anisotropic displacement parameters

| atom  | U <sub>11</sub> | U <sub>22</sub> | U <sub>33</sub> | U <sub>12</sub> | U <sub>13</sub> | U <sub>23</sub> |
|-------|-----------------|-----------------|-----------------|-----------------|-----------------|-----------------|
| Cl(1) | 0.0838(12)      | 0.0893(10)      | 0.1026(12)      | 0.0465(9)       | 0.0254(9)       | 0.0055(8)       |
| Cl(3) | 0.0769(12)      | 0.0654(9)       | 0.0952(11)      | 0.0157(8)       | -0.0105(9)      | 0.0051(8)       |
| S(1)  | 0.0521(11)      | 0.0429(8)       | 0.0442(9)       | -0.0078(8)      | 0.0195(8)       | -0.0098(7)      |
| S(2)  | 0.0463(11)      | 0.0408(8)       | 0.0515(9)       | -0.0004(8)      | 0.0200(8)       | 0.0069(7)       |
| O(1)  | 0.067(2)        | 0.056(2)        | 0.041(2)        | -0.0003(17)     | 0.0272(18)      | -0.0022(15)     |
| O(2)  | 0.051(3)        | 0.103(3)        | 0.105(3)        | -0.004(2)       | 0.033(2)        | -0.004(2)       |
| O(3)  | 0.038(3)        | 0.112(3)        | 0.072(3)        | -0.006(2)       | 0.005(2)        | 0.010(2)        |
| O(6)  | 0.050(3)        | 0.101(3)        | 0.052(2)        | 0.002(2)        | 0.005(2)        | 0.006(2)        |
| O(7)  | 0.052(3)        | 0.098(3)        | 0.111(3)        | 0.013(2)        | 0.037(2)        | -0.004(2)       |
| O(8)  | 0.044(2)        | 0.053(2)        | 0.058(2)        | -0.0152(17)     | 0.0115(19)      | -0.0130(15)     |
| O(9)  | 0.069(2)        | 0.061(2)        | 0.040(2)        | 0.0107(18)      | 0.0192(19)      | 0.0080(17)      |
| O(12) | 0.037(2)        | 0.053(2)        | 0.098(2)        | -0.0078(18)     | 0.021(2)        | 0.0128(17)      |
| N(1)  | 0.043(3)        | 0.031(2)        | 0.046(2)        | 0.001(2)        | 0.019(2)        | -0.0020(19)     |
| N(2)  | 0.043(3)        | 0.036(2)        | 0.034(2)        | 0.002(2)        | 0.013(2)        | -0.0059(19)     |
| N(3)  | 0.040(3)        | 0.051(2)        | 0.039(2)        | 0.001(2)        | 0.010(2)        | 0.006(2)        |
| N(4)  | 0.030(3)        | 0.038(2)        | 0.040(2)        | -0.002(2)       | 0.007(2)        | -0.0004(19)     |
| C(1)  | 0.043(4)        | 0.027(2)        | 0.041(3)        | 0.004(2)        | 0.022(3)        | 0.001(2)        |
| C(2)  | 0.040(4)        | 0.039(3)        | 0.042(3)        | 0.009(3)        | 0.018(3)        | 0.018(2)        |
| C(3)  | 0.040(4)        | 0.054(3)        | 0.053(3)        | 0.001(3)        | 0.016(3)        | 0.005(2)        |
| C(17) | 0.073(4)        | 0.050(3)        | 0.056(3)        | -0.012(3)       | 0.035(3)        | -0.002(2)       |
| C(19) | 0.043(4)        | 0.047(3)        | 0.046(3)        | 0.004(3)        | 0.014(3)        | -0.004(2)       |
| C(21) | 0.072(4)        | 0.027(2)        | 0.058(3)        | -0.008(2)       | 0.017(2)        | -0.005(2)       |
| C(23) | 0.053(4)        | 0.040(3)        | 0.046(3)        | -0.002(2)       | 0.020(2)        | 0.004(2)        |
| C(24) | 0.036(4)        | 0.032(3)        | 0.045(3)        | 0.002(2)        | 0.018(3)        | -0.010(2)       |
| C(25) | 0.043(4)        | 0.044(3)        | 0.057(4)        | -0.003(3)       | 0.021(3)        | -0.006(2)       |
| C(26) | 0.068(6)        | 0.062(4)        | 0.056(4)        | 0.029(4)        | 0.032(4)        | 0.013(3)        |
| C(27) | 0.082(4)        | 0.028(2)        | 0.068(3)        | -0.015(2)       | 0.037(3)        | 0.005(2)        |
| C(28) | 0.037(4)        | 0.037(3)        | 0.036(3)        | -0.007(2)       | 0.015(3)        | 0.011(2)        |
| C(29) | 0.051(4)        | 0.035(3)        | 0.023(3)        | 0.003(2)        | 0.015(2)        | 0.000(2)        |
| C(30) | 0.036(4)        | 0.038(3)        | 0.035(3)        | 0.002(2)        | 0.010(3)        | 0.003(2)        |
| C(31) | 0.058(4)        | 0.033(3)        | 0.054(3)        | -0.008(2)       | 0.017(3)        | -0.012(2)       |
| C(32) | 0.033(3)        | 0.027(2)        | 0.043(3)        | -0.009(2)       | 0.006(2)        | -0.002(2)       |
| C(33) | 0.048(4)        | 0.053(3)        | 0.045(3)        | 0.005(3)        | 0.005(3)        | 0.014(3)        |
| C(34) | 0.060(4)        | 0.046(3)        | 0.056(3)        | 0.005(3)        | 0.018(3)        | 0.015(2)        |
| C(35) | 0.050(4)        | 0.026(2)        | 0.042(3)        | -0.004(2)       | 0.022(3)        | -0.004(2)       |
| C(36) | 0.029(4)        | 0.062(4)        | 0.058(4)        | -0.008(3)       | 0.025(4)        | -0.024(3)       |
| C(37) | 0.041(4)        | 0.063(4)        | 0.028(3)        | 0.013(3)        | -0.002(3)       | -0.004(2)       |



Table 2. Anisotropic displacement parameters (continued)

| atom  | U <sub>11</sub> | U <sub>22</sub> | U <sub>33</sub> | U <sub>12</sub> | U <sub>13</sub> | U <sub>23</sub> |
|-------|-----------------|-----------------|-----------------|-----------------|-----------------|-----------------|
| C(38) | 0.062(4)        | 0.039(3)        | 0.061(4)        | 0.012(3)        | -0.005(3)       | 0.010(2)        |
| C(39) | 0.050(4)        | 0.049(3)        | 0.062(4)        | 0.011(3)        | 0.021(3)        | 0.007(2)        |
| C(40) | 0.042(4)        | 0.046(3)        | 0.038(3)        | 0.003(2)        | 0.005(2)        | -0.005(2)       |
| C(41) | 0.023(5)        | 0.086(5)        | 0.064(4)        | -0.005(4)       | 0.016(3)        | 0.029(3)        |
| C(42) | 0.039(4)        | 0.030(2)        | 0.050(3)        | 0.008(2)        | 0.014(2)        | 0.008(2)        |
| C(43) | 0.057(4)        | 0.043(3)        | 0.061(4)        | 0.012(3)        | 0.035(3)        | -0.001(3)       |
| C(44) | 0.044(4)        | 0.033(3)        | 0.044(3)        | 0.007(3)        | 0.016(3)        | 0.011(2)        |
| C(45) | 0.065(4)        | 0.079(4)        | 0.045(3)        | -0.001(3)       | 0.014(3)        | -0.011(3)       |
| C(46) | 0.075(5)        | 0.109(4)        | 0.041(3)        | 0.006(3)        | 0.011(3)        | 0.004(3)        |
| C(47) | 0.042(5)        | 0.141(6)        | 0.070(5)        | 0.005(4)        | 0.010(4)        | -0.017(4)       |
| C(48) | 0.107(5)        | 0.078(4)        | 0.057(4)        | -0.012(3)       | 0.052(3)        | 0.005(3)        |
| C(49) | 0.040(4)        | 0.052(3)        | 0.053(3)        | 0.004(3)        | 0.004(3)        | -0.002(2)       |
| C(50) | 0.054(4)        | 0.067(3)        | 0.042(3)        | -0.011(3)       | 0.005(3)        | 0.004(2)        |
| C(51) | 0.086(5)        | 0.091(4)        | 0.061(4)        | -0.005(4)       | 0.008(4)        | -0.005(3)       |
| C(52) | 0.077(5)        | 0.163(6)        | 0.031(4)        | -0.009(4)       | -0.004(3)       | -0.012(4)       |
| C(53) | 0.075(4)        | 0.080(4)        | 0.050(3)        | -0.009(3)       | 0.021(3)        | 0.017(3)        |
| C(54) | 0.043(6)        | 0.171(7)        | 0.115(6)        | 0.021(5)        | 0.038(4)        | 0.009(5)        |

The general temperature factor expression:  $\exp(-2\pi^2(a^2U_{11}h^2 + b^2U_{22}k^2 + c^2U_{33}l^2 + 2a*b*U_{12}hk + 2a*c*U_{13}hl + 2b*c*U_{23}kl))$

Table 3. Bond lengths (Å)

| atom  | atom  | distance | atom  | atom  | distance |
|-------|-------|----------|-------|-------|----------|
| Cl(1) | C(49) | 1.735(5) | Cl(3) | C(33) | 1.742(4) |
| S(1)  | O(1)  | 1.442(3) | S(1)  | O(8)  | 1.439(3) |
| S(1)  | N(1)  | 1.612(3) | S(1)  | C(1)  | 1.790(4) |
| S(2)  | O(9)  | 1.440(3) | S(2)  | O(12) | 1.433(3) |
| S(2)  | N(4)  | 1.609(4) | S(2)  | C(32) | 1.790(4) |
| O(2)  | C(41) | 1.383(8) | O(2)  | C(54) | 1.436(8) |
| O(3)  | C(36) | 1.371(7) | O(3)  | C(47) | 1.412(6) |
| O(6)  | C(37) | 1.382(6) | O(6)  | C(47) | 1.442(7) |
| O(7)  | C(26) | 1.375(9) | O(7)  | C(54) | 1.408(7) |
| N(1)  | C(2)  | 1.437(6) | N(1)  | C(27) | 1.462(5) |
| N(2)  | C(17) | 1.476(6) | N(2)  | C(35) | 1.477(6) |
| N(2)  | C(50) | 1.474(5) | N(3)  | C(28) | 1.476(5) |
| N(3)  | C(45) | 1.470(6) | N(3)  | C(46) | 1.466(5) |
| N(4)  | C(21) | 1.455(4) | N(4)  | C(24) | 1.443(6) |
| C(1)  | C(29) | 1.376(6) | C(1)  | C(31) | 1.389(6) |
| C(2)  | C(39) | 1.395(8) | C(2)  | C(44) | 1.410(6) |
| C(3)  | C(41) | 1.363(9) | C(3)  | C(44) | 1.397(8) |
| C(3)  | H(1)  | 0.950    | C(17) | C(48) | 1.556(6) |
| C(17) | H(12) | 0.950    | C(17) | H(13) | 0.950    |
| C(19) | C(24) | 1.407(6) | C(19) | C(37) | 1.353(8) |
| C(19) | H(2)  | 0.950    | C(21) | H(32) | 0.950    |
| C(21) | H(33) | 0.950    | C(21) | H(34) | 0.950    |
| C(23) | C(32) | 1.386(6) | C(23) | C(49) | 1.352(6) |
| C(23) | H(3)  | 0.950    | C(24) | C(30) | 1.393(7) |
| C(25) | C(30) | 1.404(7) | C(25) | C(36) | 1.360(7) |
| C(25) | H(4)  | 0.950    | C(26) | C(39) | 1.356(9) |
| C(26) | C(41) | 1.398(8) | C(27) | H(35) | 0.950    |
| C(27) | H(36) | 0.950    | C(27) | H(37) | 0.950    |
| C(28) | C(30) | 1.514(5) | C(28) | C(42) | 1.521(7) |
| C(28) | H(10) | 0.950    | C(29) | C(35) | 1.500(5) |
| C(29) | C(40) | 1.370(6) | C(31) | C(33) | 1.360(7) |
| C(31) | H(5)  | 0.950    | C(32) | C(42) | 1.382(7) |
| C(33) | C(43) | 1.382(6) | C(34) | C(38) | 1.384(7) |
| C(34) | C(42) | 1.387(6) | C(34) | H(38) | 0.950    |
| C(35) | C(44) | 1.518(7) | C(35) | H(11) | 0.950    |
| C(36) | C(37) | 1.388(8) | C(38) | C(49) | 1.385(8) |
| C(38) | H(6)  | 0.950    | C(39) | H(7)  | 0.950    |

Table 3. Bond lengths (Å) (continued)

| atom  | atom  | distance | atom  | atom  | distance |
|-------|-------|----------|-------|-------|----------|
| C(40) | C(43) | 1.386(6) | C(40) | H(8)  | 0.950    |
| C(43) | H(9)  | 0.950    | C(45) | C(51) | 1.524(6) |
| C(45) | H(14) | 0.950    | C(45) | H(15) | 0.950    |
| C(46) | C(52) | 1.549(7) | C(46) | H(16) | 0.950    |
| C(46) | H(17) | 0.950    | C(47) | H(18) | 0.950    |
| C(47) | H(19) | 0.950    | C(48) | C(53) | 1.535(7) |
| C(48) | H(20) | 0.950    | C(48) | H(21) | 0.950    |
| C(50) | C(53) | 1.534(7) | C(50) | H(22) | 0.950    |
| C(50) | H(23) | 0.950    | C(51) | C(52) | 1.521(7) |
| C(51) | H(24) | 0.950    | C(51) | H(25) | 0.950    |
| C(52) | H(26) | 0.950    | C(52) | H(27) | 0.950    |
| C(53) | H(28) | 0.950    | C(53) | H(29) | 0.950    |
| C(54) | H(30) | 0.950    | C(54) | H(31) | 0.950    |

Table 4. Bond angles (°)

| atom  | atom  | atom  | angle      | atom  | atom  | atom  | angle      |
|-------|-------|-------|------------|-------|-------|-------|------------|
| O(1)  | S(1)  | O(8)  | 119.21(16) | O(1)  | S(1)  | N(1)  | 109.0(2)   |
| O(1)  | S(1)  | C(1)  | 104.1(2)   | O(8)  | S(1)  | N(1)  | 107.23(18) |
| O(8)  | S(1)  | C(1)  | 107.9(2)   | N(1)  | S(1)  | C(1)  | 109.1(2)   |
| O(9)  | S(2)  | O(12) | 118.0(2)   | O(9)  | S(2)  | N(4)  | 109.80(17) |
| O(9)  | S(2)  | C(32) | 104.67(17) | O(12) | S(2)  | N(4)  | 107.28(18) |
| O(12) | S(2)  | C(32) | 108.03(19) | N(4)  | S(2)  | C(32) | 108.8(2)   |
| C(41) | O(2)  | C(54) | 102.6(4)   | C(36) | O(3)  | C(47) | 105.4(4)   |
| C(37) | O(6)  | C(47) | 103.6(3)   | C(26) | O(7)  | C(54) | 105.1(4)   |
| S(1)  | N(1)  | C(2)  | 116.8(3)   | S(1)  | N(1)  | C(27) | 122.5(3)   |
| C(2)  | N(1)  | C(27) | 120.1(3)   | C(17) | N(2)  | C(35) | 111.4(3)   |
| C(17) | N(2)  | C(50) | 102.3(3)   | C(35) | N(2)  | C(50) | 113.4(3)   |
| C(28) | N(3)  | C(45) | 112.5(3)   | C(28) | N(3)  | C(46) | 112.6(3)   |
| C(45) | N(3)  | C(46) | 103.9(3)   | S(2)  | N(4)  | C(21) | 122.4(3)   |
| S(2)  | N(4)  | C(24) | 116.5(2)   | C(21) | N(4)  | C(24) | 120.8(3)   |
| S(1)  | C(1)  | C(29) | 126.8(3)   | S(1)  | C(1)  | C(31) | 111.3(3)   |
| C(29) | C(1)  | C(31) | 121.8(4)   | N(1)  | C(2)  | C(39) | 116.1(4)   |
| N(1)  | C(2)  | C(44) | 120.1(5)   | C(39) | C(2)  | C(44) | 123.9(5)   |
| C(41) | C(3)  | C(44) | 117.0(4)   | C(41) | C(3)  | H(1)  | 121.1      |
| C(44) | C(3)  | H(1)  | 121.9      | N(2)  | C(17) | C(48) | 103.3(3)   |
| N(2)  | C(17) | H(12) | 112.1      | N(2)  | C(17) | H(13) | 109.2      |
| C(48) | C(17) | H(12) | 111.0      | C(48) | C(17) | H(13) | 111.7      |
| H(12) | C(17) | H(13) | 109.5      | C(24) | C(19) | C(37) | 115.7(4)   |
| C(24) | C(19) | H(2)  | 121.8      | C(37) | C(19) | H(2)  | 122.5      |
| N(4)  | C(21) | H(32) | 109.6      | N(4)  | C(21) | H(33) | 109.4      |
| N(4)  | C(21) | H(34) | 109.4      | H(32) | C(21) | H(33) | 109.5      |
| H(32) | C(21) | H(34) | 109.5      | H(33) | C(21) | H(34) | 109.5      |
| C(32) | C(23) | C(49) | 119.9(4)   | C(32) | C(23) | H(3)  | 120.4      |
| C(49) | C(23) | H(3)  | 119.7      | N(4)  | C(24) | C(19) | 118.3(4)   |
| N(4)  | C(24) | C(30) | 119.3(4)   | C(19) | C(24) | C(30) | 122.3(4)   |
| C(30) | C(25) | C(36) | 117.3(4)   | C(30) | C(25) | H(4)  | 121.8      |
| C(36) | C(25) | H(4)  | 120.9      | O(7)  | C(26) | C(39) | 129.6(5)   |
| O(7)  | C(26) | C(41) | 109.1(5)   | C(39) | C(26) | C(41) | 121.3(6)   |
| N(1)  | C(27) | H(35) | 110.5      | N(1)  | C(27) | H(36) | 109.3      |
| N(1)  | C(27) | H(37) | 108.6      | H(35) | C(27) | H(36) | 109.5      |
| H(35) | C(27) | H(37) | 109.5      | H(36) | C(27) | H(37) | 109.5      |
| N(3)  | C(28) | C(30) | 111.1(3)   | N(3)  | C(28) | C(42) | 111.1(3)   |
| N(3)  | C(28) | H(10) | 106.7      | C(30) | C(28) | C(42) | 114.2(3)   |

Table 4. Bond angles ( $^{\circ}$ ) (continued)

| atom  | atom  | atom  | angle    | atom  | atom  | atom  | angle    |
|-------|-------|-------|----------|-------|-------|-------|----------|
| C(30) | C(28) | H(10) | 107.1    | C(42) | C(28) | H(10) | 106.1    |
| C(1)  | C(29) | C(35) | 126.6(4) | C(1)  | C(29) | C(40) | 116.8(3) |
| C(35) | C(29) | C(40) | 116.5(3) | C(24) | C(30) | C(25) | 119.8(4) |
| C(24) | C(30) | C(28) | 122.2(4) | C(25) | C(30) | C(28) | 118.0(4) |
| C(1)  | C(31) | C(33) | 119.7(3) | C(1)  | C(31) | H(5)  | 120.4    |
| C(33) | C(31) | H(5)  | 119.9    | S(2)  | C(32) | C(23) | 111.0(3) |
| S(2)  | C(32) | C(42) | 126.7(3) | C(23) | C(32) | C(42) | 122.0(3) |
| Cl(3) | C(33) | C(31) | 120.4(3) | Cl(3) | C(33) | C(43) | 119.3(3) |
| C(31) | C(33) | C(43) | 120.3(4) | C(38) | C(34) | C(42) | 121.6(4) |
| C(38) | C(34) | H(38) | 119.7    | C(42) | C(34) | H(38) | 118.7    |
| N(2)  | C(35) | C(29) | 110.2(3) | N(2)  | C(35) | C(44) | 109.3(3) |
| N(2)  | C(35) | H(11) | 106.7    | C(29) | C(35) | C(44) | 116.8(3) |
| C(29) | C(35) | H(11) | 106.4    | C(44) | C(35) | H(11) | 107.0    |
| O(3)  | C(36) | C(25) | 128.2(5) | O(3)  | C(36) | C(37) | 109.9(4) |
| C(25) | C(36) | C(37) | 121.9(5) | O(6)  | C(37) | C(19) | 126.5(5) |
| O(6)  | C(37) | C(36) | 110.5(5) | C(19) | C(37) | C(36) | 123.0(5) |
| C(34) | C(38) | C(49) | 119.5(4) | C(34) | C(38) | H(6)  | 121.7    |
| C(49) | C(38) | H(6)  | 118.8    | C(2)  | C(39) | C(26) | 115.8(4) |
| C(2)  | C(39) | H(7)  | 121.7    | C(26) | C(39) | H(7)  | 122.5    |
| C(29) | C(40) | C(43) | 123.0(3) | C(29) | C(40) | H(8)  | 117.3    |
| C(43) | C(40) | H(8)  | 119.7    | O(2)  | C(41) | C(3)  | 125.1(5) |
| O(2)  | C(41) | C(26) | 111.4(6) | C(3)  | C(41) | C(26) | 123.5(6) |
| C(28) | C(42) | C(32) | 126.7(3) | C(28) | C(42) | C(34) | 116.4(4) |
| C(32) | C(42) | C(34) | 116.9(4) | C(33) | C(43) | C(40) | 118.3(4) |
| C(33) | C(43) | H(9)  | 120.0    | C(40) | C(43) | H(9)  | 121.7    |
| C(2)  | C(44) | C(3)  | 118.5(5) | C(2)  | C(44) | C(35) | 121.7(4) |
| C(3)  | C(44) | C(35) | 119.7(4) | N(3)  | C(45) | C(51) | 104.0(3) |
| N(3)  | C(45) | H(14) | 109.5    | N(3)  | C(45) | H(15) | 111.2    |
| C(51) | C(45) | H(14) | 111.6    | C(51) | C(45) | H(15) | 110.9    |
| H(14) | C(45) | H(15) | 109.5    | N(3)  | C(46) | C(52) | 102.9(3) |
| N(3)  | C(46) | H(16) | 112.3    | N(3)  | C(46) | H(17) | 109.8    |
| C(52) | C(46) | H(16) | 110.7    | C(52) | C(46) | H(17) | 111.5    |
| H(16) | C(46) | H(17) | 109.5    | O(3)  | C(47) | O(6)  | 109.9(3) |
| O(3)  | C(47) | H(18) | 110.1    | O(3)  | C(47) | H(19) | 108.8    |
| O(6)  | C(47) | H(18) | 109.8    | O(6)  | C(47) | H(19) | 108.7    |
| H(18) | C(47) | H(19) | 109.5    | C(17) | C(48) | C(53) | 104.8(4) |
| C(17) | C(48) | H(20) | 111.8    | C(17) | C(48) | H(21) | 110.1    |

Table 4. Bond angles ( $^{\circ}$ ) (continued)

| atom  | atom  | atom  | angle    | atom  | atom  | atom  | angle    |
|-------|-------|-------|----------|-------|-------|-------|----------|
| C(53) | C(48) | H(20) | 111.1    | C(53) | C(48) | H(21) | 109.5    |
| H(20) | C(48) | H(21) | 109.5    | Cl(1) | C(49) | C(23) | 120.2(4) |
| Cl(1) | C(49) | C(38) | 119.7(3) | C(23) | C(49) | C(38) | 120.1(4) |
| N(2)  | C(50) | C(53) | 104.4(3) | N(2)  | C(50) | H(22) | 109.9    |
| N(2)  | C(50) | H(23) | 111.2    | C(53) | C(50) | H(22) | 111.0    |
| C(53) | C(50) | H(23) | 110.9    | H(22) | C(50) | H(23) | 109.5    |
| C(45) | C(51) | C(52) | 105.2(4) | C(45) | C(51) | H(24) | 110.1    |
| C(45) | C(51) | H(25) | 111.3    | C(52) | C(51) | H(24) | 111.0    |
| C(52) | C(51) | H(25) | 109.7    | H(24) | C(51) | H(25) | 109.5    |
| C(46) | C(52) | C(51) | 104.6(3) | C(46) | C(52) | H(26) | 112.4    |
| C(46) | C(52) | H(27) | 109.8    | C(51) | C(52) | H(26) | 110.9    |
| C(51) | C(52) | H(27) | 109.5    | H(26) | C(52) | H(27) | 109.5    |
| C(48) | C(53) | C(50) | 103.7(3) | C(48) | C(53) | H(28) | 109.8    |
| C(48) | C(53) | H(29) | 111.4    | C(50) | C(53) | H(28) | 111.8    |
| C(50) | C(53) | H(29) | 110.4    | H(28) | C(53) | H(29) | 109.5    |
| O(2)  | C(54) | O(7)  | 111.5(5) | O(2)  | C(54) | H(30) | 107.7    |
| O(2)  | C(54) | H(31) | 109.7    | O(7)  | C(54) | H(30) | 108.3    |
| O(7)  | C(54) | H(31) | 110.1    | H(30) | C(54) | H(31) | 109.5    |

Table 5. Torsion Angles( $^{\circ}$ )

| atom1 | atom2 | atom3 | atom4 | angle     | atom1 | atom2 | atom3 | atom4 | angle     |
|-------|-------|-------|-------|-----------|-------|-------|-------|-------|-----------|
| O(1)  | S(1)  | N(1)  | C(2)  | 46.8(3)   | O(1)  | S(1)  | N(1)  | C(27) | -141.5(3) |
| O(1)  | S(1)  | C(1)  | C(29) | -101.9(5) | O(1)  | S(1)  | C(1)  | C(31) | 74.4(4)   |
| O(8)  | S(1)  | N(1)  | C(2)  | 177.1(3)  | O(8)  | S(1)  | N(1)  | C(27) | -11.2(3)  |
| O(8)  | S(1)  | C(1)  | C(29) | 130.5(4)  | O(8)  | S(1)  | C(1)  | C(31) | -53.2(4)  |
| N(1)  | S(1)  | C(1)  | C(29) | 14.3(5)   | N(1)  | S(1)  | C(1)  | C(31) | -169.4(3) |
| C(1)  | S(1)  | N(1)  | C(2)  | -66.3(4)  | C(1)  | S(1)  | N(1)  | C(27) | 105.4(3)  |
| O(9)  | S(2)  | N(4)  | C(21) | -135.7(2) | O(9)  | S(2)  | N(4)  | C(24) | 50.1(3)   |
| O(9)  | S(2)  | C(32) | C(23) | 66.0(3)   | O(9)  | S(2)  | C(32) | C(42) | -109.3(3) |
| O(12) | S(2)  | N(4)  | C(21) | -6.3(3)   | O(12) | S(2)  | N(4)  | C(24) | 179.4(2)  |
| O(12) | S(2)  | C(32) | C(23) | -60.5(3)  | O(12) | S(2)  | C(32) | C(42) | 124.2(3)  |
| N(4)  | S(2)  | C(32) | C(23) | -176.7(2) | N(4)  | S(2)  | C(32) | C(42) | 8.0(4)    |
| C(32) | S(2)  | N(4)  | C(21) | 110.3(3)  | C(32) | S(2)  | N(4)  | C(24) | -63.9(3)  |
| C(41) | O(2)  | C(54) | O(7)  | -5.2(6)   | C(54) | O(2)  | C(41) | C(3)  | -178.5(5) |
| C(54) | O(2)  | C(41) | C(26) | 3.7(6)    | C(36) | O(3)  | C(47) | O(6)  | -8.1(6)   |
| C(47) | O(3)  | C(36) | C(25) | -175.7(6) | C(47) | O(3)  | C(36) | C(37) | 4.0(6)    |
| C(37) | O(6)  | C(47) | O(3)  | 9.0(6)    | C(47) | O(6)  | C(37) | C(19) | 174.5(5)  |
| C(47) | O(6)  | C(37) | C(36) | -6.4(6)   | C(26) | O(7)  | C(54) | O(2)  | 4.8(6)    |
| C(54) | O(7)  | C(26) | C(39) | 176.1(6)  | C(54) | O(7)  | C(26) | C(41) | -2.3(6)   |
| S(1)  | N(1)  | C(2)  | C(39) | -107.5(4) | S(1)  | N(1)  | C(2)  | C(44) | 72.5(5)   |
| C(27) | N(1)  | C(2)  | C(39) | 80.5(5)   | C(27) | N(1)  | C(2)  | C(44) | -99.4(5)  |
| C(17) | N(2)  | C(35) | C(29) | -60.2(4)  | C(17) | N(2)  | C(35) | C(44) | 170.3(3)  |
| C(35) | N(2)  | C(17) | C(48) | -165.2(3) | C(17) | N(2)  | C(50) | C(53) | 45.7(3)   |
| C(50) | N(2)  | C(17) | C(48) | -43.7(3)  | C(35) | N(2)  | C(50) | C(53) | 165.8(3)  |
| C(50) | N(2)  | C(35) | C(29) | -175.0(3) | C(50) | N(2)  | C(35) | C(44) | 55.4(4)   |
| C(28) | N(3)  | C(45) | C(51) | 164.3(3)  | C(45) | N(3)  | C(28) | C(30) | 54.6(5)   |
| C(45) | N(3)  | C(28) | C(42) | -177.1(3) | C(28) | N(3)  | C(46) | C(52) | -165.1(4) |
| C(46) | N(3)  | C(28) | C(30) | 171.6(4)  | C(46) | N(3)  | C(28) | C(42) | -60.1(5)  |
| C(45) | N(3)  | C(46) | C(52) | -43.1(4)  | C(46) | N(3)  | C(45) | C(51) | 42.2(4)   |
| S(2)  | N(4)  | C(24) | C(19) | -103.4(4) | S(2)  | N(4)  | C(24) | C(30) | 75.6(5)   |
| C(21) | N(4)  | C(24) | C(19) | 82.2(5)   | C(21) | N(4)  | C(24) | C(30) | -98.7(5)  |
| S(1)  | C(1)  | C(29) | C(35) | -8.1(8)   | S(1)  | C(1)  | C(29) | C(40) | 175.2(4)  |
| S(1)  | C(1)  | C(31) | C(33) | -175.7(4) | C(29) | C(1)  | C(31) | C(33) | 0.8(8)    |
| C(31) | C(1)  | C(29) | C(35) | 176.0(5)  | C(31) | C(1)  | C(29) | C(40) | -0.7(8)   |
| N(1)  | C(2)  | C(39) | C(26) | -179.7(4) | N(1)  | C(2)  | C(44) | C(3)  | -179.1(4) |
| N(1)  | C(2)  | C(44) | C(35) | 3.6(6)    | C(39) | C(2)  | C(44) | C(3)  | 0.9(7)    |
| C(39) | C(2)  | C(44) | C(35) | -176.4(4) | C(44) | C(2)  | C(39) | C(26) | 0.3(6)    |
| C(41) | C(3)  | C(44) | C(2)  | -0.4(6)   | C(41) | C(3)  | C(44) | C(35) | 177.0(4)  |

Table 5. Torsion angles ( $^{\circ}$ ) (continued)

| atom1 | atom2 | atom3 | atom4 | angle     | atom1 | atom2 | atom3 | atom4 | angle     |
|-------|-------|-------|-------|-----------|-------|-------|-------|-------|-----------|
| C(44) | C(3)  | C(41) | O(2)  | -178.8(4) | C(44) | C(3)  | C(41) | C(26) | -1.3(8)   |
| N(2)  | C(17) | C(48) | C(53) | 25.4(3)   | C(24) | C(19) | C(37) | O(6)  | 179.0(5)  |
| C(24) | C(19) | C(37) | C(36) | 0.0(8)    | C(37) | C(19) | C(24) | N(4)  | 178.1(4)  |
| C(37) | C(19) | C(24) | C(30) | -0.9(7)   | C(32) | C(23) | C(49) | Cl(1) | 177.8(3)  |
| C(32) | C(23) | C(49) | C(38) | 0.2(5)    | C(49) | C(23) | C(32) | S(2)  | -176.8(3) |
| C(49) | C(23) | C(32) | C(42) | -1.3(6)   | N(4)  | C(24) | C(30) | C(25) | -177.8(4) |
| N(4)  | C(24) | C(30) | C(28) | 2.0(7)    | C(19) | C(24) | C(30) | C(25) | 1.2(7)    |
| C(19) | C(24) | C(30) | C(28) | -179.0(4) | C(30) | C(25) | C(36) | O(3)  | 179.4(5)  |
| C(30) | C(25) | C(36) | C(37) | -0.3(7)   | C(36) | C(25) | C(30) | C(24) | -0.6(7)   |
| C(36) | C(25) | C(30) | C(28) | 179.6(4)  | O(7)  | C(26) | C(39) | C(2)  | 179.8(4)  |
| O(7)  | C(26) | C(41) | O(2)  | -1.0(6)   | O(7)  | C(26) | C(41) | C(3)  | -178.8(5) |
| C(39) | C(26) | C(41) | O(2)  | -179.6(5) | C(39) | C(26) | C(41) | C(3)  | 2.6(9)    |
| C(41) | C(26) | C(39) | C(2)  | -2.0(8)   | N(3)  | C(28) | C(30) | C(24) | 58.9(6)   |
| N(3)  | C(28) | C(30) | C(25) | -121.3(4) | N(3)  | C(28) | C(42) | C(32) | -76.3(5)  |
| N(3)  | C(28) | C(42) | C(34) | 103.3(4)  | C(30) | C(28) | C(42) | C(32) | 50.3(5)   |
| C(30) | C(28) | C(42) | C(34) | -130.1(4) | C(42) | C(28) | C(30) | C(24) | -67.7(5)  |
| C(42) | C(28) | C(30) | C(25) | 112.1(5)  | C(1)  | C(29) | C(35) | N(2)  | -75.2(6)  |
| C(1)  | C(29) | C(35) | C(44) | 50.1(7)   | C(1)  | C(29) | C(40) | C(43) | 1.2(8)    |
| C(35) | C(29) | C(40) | C(43) | -175.8(4) | C(40) | C(29) | C(35) | N(2)  | 101.5(4)  |
| C(40) | C(29) | C(35) | C(44) | -133.2(4) | C(1)  | C(31) | C(33) | Cl(3) | 179.5(4)  |
| C(1)  | C(31) | C(33) | C(43) | -1.4(8)   | S(2)  | C(32) | C(42) | C(28) | -3.9(6)   |
| S(2)  | C(32) | C(42) | C(34) | 176.6(3)  | C(23) | C(32) | C(42) | C(28) | -178.7(3) |
| C(23) | C(32) | C(42) | C(34) | 1.8(6)    | Cl(3) | C(33) | C(43) | C(40) | -179.0(4) |
| C(31) | C(33) | C(43) | C(40) | 1.8(8)    | C(38) | C(34) | C(42) | C(28) | 179.1(3)  |
| C(38) | C(34) | C(42) | C(32) | -1.3(6)   | C(42) | C(34) | C(38) | C(49) | 0.3(6)    |
| N(2)  | C(35) | C(44) | C(2)  | 59.1(5)   | N(2)  | C(35) | C(44) | C(3)  | -118.1(4) |
| C(29) | C(35) | C(44) | C(2)  | -66.7(5)  | C(29) | C(35) | C(44) | C(3)  | 116.0(4)  |
| O(3)  | C(36) | C(37) | O(6)  | 1.7(7)    | O(3)  | C(36) | C(37) | C(19) | -179.1(5) |
| C(25) | C(36) | C(37) | O(6)  | -178.6(5) | C(25) | C(36) | C(37) | C(19) | 0.6(9)    |
| C(34) | C(38) | C(49) | Cl(1) | -177.3(3) | C(34) | C(38) | C(49) | C(23) | 0.3(6)    |
| C(29) | C(40) | C(43) | C(33) | -1.8(8)   | N(3)  | C(45) | C(51) | C(52) | -23.9(5)  |
| N(3)  | C(46) | C(52) | C(51) | 27.3(5)   | C(17) | C(48) | C(53) | C(50) | 1.9(4)    |
| N(2)  | C(50) | C(53) | C(48) | -28.7(4)  | C(45) | C(51) | C(52) | C(46) | -2.1(5)   |

The sign is positive if when looking from atom 2 to atom 3 a clock-wise motion of atom 1 would superimpose it on atom 4.



Table 6. Distances beyond the asymmetric unit out to 3.60 Å

| atom  | atom                 | distance | atom  | atom                | distance |
|-------|----------------------|----------|-------|---------------------|----------|
| Cl(1) | O(8) <sup>1)</sup>   | 3.400(2) | Cl(1) | H(5) <sup>1)</sup>  | 3.169    |
| Cl(1) | H(7) <sup>2)</sup>   | 3.496    | Cl(1) | H(36) <sup>2)</sup> | 2.957    |
| Cl(3) | O(12) <sup>3)</sup>  | 3.354(2) | Cl(3) | H(17) <sup>3)</sup> | 3.096    |
| Cl(3) | H(24) <sup>4)</sup>  | 3.017    | Cl(3) | H(32) <sup>4)</sup> | 3.507    |
| Cl(3) | H(33) <sup>4)</sup>  | 3.242    | S(1)  | H(30) <sup>3)</sup> | 3.323    |
| S(1)  | H(36) <sup>5)</sup>  | 3.548    | S(1)  | H(37) <sup>5)</sup> | 3.145    |
| S(2)  | H(19) <sup>1)</sup>  | 3.437    | O(1)  | C(27) <sup>5)</sup> | 3.485(4) |
| O(1)  | C(34)                | 3.480(6) | O(1)  | C(48) <sup>6)</sup> | 3.593(5) |
| O(1)  | H(4)                 | 3.024    | O(1)  | H(10)               | 2.773    |
| O(1)  | H(20) <sup>6)</sup>  | 2.727    | O(1)  | H(28) <sup>6)</sup> | 3.370    |
| O(1)  | H(36) <sup>5)</sup>  | 3.315    | O(1)  | H(37) <sup>5)</sup> | 2.793    |
| O(1)  | H(38)                | 2.692    | O(2)  | H(13) <sup>1)</sup> | 3.027    |
| O(2)  | H(18) <sup>7)</sup>  | 3.203    | O(2)  | H(21) <sup>1)</sup> | 3.598    |
| O(3)  | O(12) <sup>3)</sup>  | 3.483(5) | O(3)  | C(23) <sup>3)</sup> | 3.383(6) |
| O(3)  | H(3) <sup>3)</sup>   | 2.468    | O(3)  | H(13) <sup>6)</sup> | 3.552    |
| O(3)  | H(33) <sup>4)</sup>  | 3.568    | O(6)  | C(43) <sup>6)</sup> | 3.390(7) |
| O(6)  | H(2) <sup>4)</sup>   | 3.547    | O(6)  | H(9) <sup>6)</sup>  | 2.784    |
| O(6)  | H(34) <sup>4)</sup>  | 3.402    | O(7)  | H(6)                | 3.005    |
| O(7)  | H(6) <sup>2)</sup>   | 3.351    | O(7)  | H(7) <sup>2)</sup>  | 3.459    |
| O(7)  | H(28) <sup>8)</sup>  | 3.497    | O(8)  | Cl(1) <sup>3)</sup> | 3.400(2) |
| O(8)  | N(1) <sup>5)</sup>   | 3.571(4) | O(8)  | C(27) <sup>5)</sup> | 3.317(5) |
| O(8)  | C(54) <sup>3)</sup>  | 3.220(7) | O(8)  | H(7) <sup>5)</sup>  | 2.821    |
| O(8)  | H(30) <sup>3)</sup>  | 2.539    | O(8)  | H(31) <sup>3)</sup> | 3.218    |
| O(8)  | H(36) <sup>5)</sup>  | 2.943    | O(8)  | H(37) <sup>5)</sup> | 3.052    |
| O(9)  | C(35) <sup>6)</sup>  | 3.577(4) | O(9)  | C(40) <sup>6)</sup> | 3.525(4) |
| O(9)  | H(1) <sup>6)</sup>   | 3.142    | O(9)  | H(8) <sup>6)</sup>  | 2.672    |
| O(9)  | H(11) <sup>6)</sup>  | 2.652    | O(9)  | H(19) <sup>1)</sup> | 3.119    |
| O(9)  | H(25) <sup>6)</sup>  | 3.581    | O(9)  | H(26) <sup>6)</sup> | 2.772    |
| O(12) | Cl(3) <sup>1)</sup>  | 3.354(2) | O(12) | O(3) <sup>1)</sup>  | 3.483(5) |
| O(12) | C(19) <sup>9)</sup>  | 3.267(5) | O(12) | C(21) <sup>9)</sup> | 3.410(4) |
| O(12) | C(47) <sup>1)</sup>  | 3.579(7) | O(12) | H(2) <sup>9)</sup>  | 3.001    |
| O(12) | H(19) <sup>1)</sup>  | 2.868    | O(12) | H(33) <sup>9)</sup> | 2.474    |
| N(1)  | O(8) <sup>5)</sup>   | 3.571(4) | N(1)  | H(37) <sup>5)</sup> | 3.441    |
| C(1)  | H(15)                | 3.514    | C(1)  | H(30) <sup>3)</sup> | 3.051    |
| C(2)  | H(38)                | 3.372    | C(3)  | H(16)               | 2.946    |
| C(17) | C(25) <sup>10)</sup> | 3.481(6) | C(17) | H(4) <sup>10)</sup> | 3.594    |
| C(17) | H(31) <sup>3)</sup>  | 3.469    | C(19) | O(12) <sup>4)</sup> | 3.267(5) |

Table 6. Distances beyond the asymmetric unit out to 3.60 Å (continued)

| atom  | atom                 | distance | atom  | atom                 | distance |
|-------|----------------------|----------|-------|----------------------|----------|
| C(19) | H(8) <sup>6j</sup>   | 2.990    | C(19) | H(9) <sup>6j</sup>   | 3.490    |
| C(19) | H(34) <sup>4j</sup>  | 3.022    | C(21) | O(12) <sup>4j</sup>  | 3.410(4) |
| C(21) | C(37) <sup>9j</sup>  | 3.591(7) | C(21) | H(14) <sup>9j</sup>  | 3.454    |
| C(23) | O(3) <sup>1j</sup>   | 3.383(6) | C(23) | H(1) <sup>6j</sup>   | 3.352    |
| C(23) | H(5) <sup>1j</sup>   | 3.564    | C(23) | H(23) <sup>6j</sup>  | 3.073    |
| C(24) | H(8) <sup>6j</sup>   | 3.441    | C(24) | H(12) <sup>6j</sup>  | 3.468    |
| C(24) | H(34) <sup>4j</sup>  | 3.357    | C(25) | C(17) <sup>6j</sup>  | 3.481(6) |
| C(25) | H(12) <sup>6j</sup>  | 2.822    | C(25) | H(20) <sup>6j</sup>  | 3.124    |
| C(25) | H(34) <sup>4j</sup>  | 3.478    | C(26) | H(6)                 | 3.305    |
| C(26) | H(38)                | 3.271    | C(27) | O(1) <sup>5j</sup>   | 3.485(4) |
| C(27) | O(8) <sup>5j</sup>   | 3.317(5) | C(27) | C(48) <sup>11j</sup> | 3.478(6) |
| C(27) | C(53) <sup>11j</sup> | 3.489(6) | C(27) | H(20) <sup>11j</sup> | 3.341    |
| C(27) | H(21) <sup>11j</sup> | 3.145    | C(27) | H(28) <sup>11j</sup> | 3.340    |
| C(27) | H(29) <sup>11j</sup> | 3.192    | C(27) | H(31) <sup>3j</sup>  | 3.473    |
| C(29) | H(15)                | 3.459    | C(29) | H(16)                | 3.494    |
| C(30) | H(12) <sup>6j</sup>  | 3.025    | C(30) | H(34) <sup>4j</sup>  | 3.570    |
| C(31) | H(4)                 | 3.236    | C(31) | H(15)                | 3.323    |
| C(31) | H(30) <sup>3j</sup>  | 3.017    | C(32) | H(23) <sup>6j</sup>  | 3.329    |
| C(33) | H(15)                | 3.017    | C(34) | O(1)                 | 3.480(6) |
| C(34) | H(23) <sup>6j</sup>  | 3.247    | C(34) | H(28) <sup>6j</sup>  | 3.211    |
| C(35) | O(9) <sup>10j</sup>  | 3.577(4) | C(36) | H(12) <sup>6j</sup>  | 3.099    |
| C(36) | H(13) <sup>6j</sup>  | 3.427    | C(36) | H(33) <sup>4j</sup>  | 3.486    |
| C(36) | H(34) <sup>4j</sup>  | 3.123    | C(37) | C(21) <sup>4j</sup>  | 3.591(7) |
| C(37) | H(8) <sup>6j</sup>   | 3.197    | C(37) | H(9) <sup>6j</sup>   | 3.261    |
| C(37) | H(12) <sup>6j</sup>  | 3.552    | C(37) | H(33) <sup>4j</sup>  | 3.553    |
| C(37) | H(34) <sup>4j</sup>  | 2.874    | C(38) | H(23) <sup>6j</sup>  | 2.988    |
| C(38) | H(28) <sup>6j</sup>  | 3.220    | C(39) | H(38)                | 3.142    |
| C(40) | O(9) <sup>10j</sup>  | 3.525(4) | C(40) | H(15)                | 3.136    |
| C(40) | H(25)                | 3.267    | C(41) | H(16)                | 3.476    |
| C(42) | H(12) <sup>6j</sup>  | 3.546    | C(42) | H(23) <sup>6j</sup>  | 3.423    |
| C(43) | O(6) <sup>10j</sup>  | 3.390(7) | C(43) | H(15)                | 2.934    |
| C(43) | H(18) <sup>10j</sup> | 3.489    | C(43) | H(24) <sup>4j</sup>  | 3.465    |
| C(43) | H(25)                | 3.312    | C(44) | H(16)                | 3.169    |
| C(47) | O(12) <sup>3j</sup>  | 3.579(7) | C(47) | H(1) <sup>12j</sup>  | 3.523    |
| C(47) | H(3) <sup>3j</sup>   | 3.240    | C(47) | H(9) <sup>6j</sup>   | 3.592    |
| C(47) | H(26) <sup>12j</sup> | 3.232    | C(47) | H(27) <sup>12j</sup> | 3.491    |
| C(48) | O(1) <sup>10j</sup>  | 3.593(5) | C(48) | C(27) <sup>11j</sup> | 3.478(6) |

Table 6. Distances beyond the asymmetric unit out to 3.60 Å (continued)

| atom  | atom                 | distance | atom  | atom                 | distance |
|-------|----------------------|----------|-------|----------------------|----------|
| C(48) | H(4) <sup>10)</sup>  | 3.442    | C(48) | H(29) <sup>11)</sup> | 3.416    |
| C(48) | H(31) <sup>3)</sup>  | 3.598    | C(48) | H(35) <sup>11)</sup> | 3.207    |
| C(48) | H(36) <sup>11)</sup> | 3.243    | C(48) | H(37) <sup>11)</sup> | 3.413    |
| C(49) | H(5) <sup>1)</sup>   | 3.145    | C(49) | H(23) <sup>6)</sup>  | 2.896    |
| C(51) | H(9) <sup>9)</sup>   | 3.489    | C(52) | H(18) <sup>7)</sup>  | 3.414    |
| C(52) | H(19) <sup>7)</sup>  | 3.258    | C(53) | C(27) <sup>11)</sup> | 3.489(6) |
| C(53) | H(29) <sup>11)</sup> | 3.385    | C(53) | H(31) <sup>8)</sup>  | 3.283    |
| C(53) | H(35) <sup>11)</sup> | 3.014    | C(53) | H(37) <sup>11)</sup> | 3.260    |
| C(54) | O(8) <sup>1)</sup>   | 3.220(7) | C(54) | H(13) <sup>1)</sup>  | 3.261    |
| C(54) | H(29) <sup>8)</sup>  | 3.571    | H(1)  | O(9) <sup>10)</sup>  | 3.142    |
| H(1)  | C(23) <sup>10)</sup> | 3.352    | H(1)  | C(47) <sup>7)</sup>  | 3.523    |
| H(1)  | H(3) <sup>10)</sup>  | 2.883    | H(1)  | H(16)                | 3.003    |
| H(1)  | H(18) <sup>7)</sup>  | 3.074    | H(1)  | H(19) <sup>7)</sup>  | 3.408    |
| H(1)  | H(26)                | 3.159    | H(2)  | O(6) <sup>9)</sup>   | 3.547    |
| H(2)  | O(12) <sup>4)</sup>  | 3.001    | H(2)  | H(8) <sup>6)</sup>   | 3.101    |
| H(2)  | H(9) <sup>6)</sup>   | 3.271    | H(2)  | H(19) <sup>9)</sup>  | 2.990    |
| H(2)  | H(34) <sup>4)</sup>  | 3.425    | H(3)  | O(3) <sup>1)</sup>   | 2.468    |
| H(3)  | C(47) <sup>1)</sup>  | 3.240    | H(3)  | H(1) <sup>6)</sup>   | 2.883    |
| H(3)  | H(18) <sup>1)</sup>  | 3.561    | H(3)  | H(19) <sup>1)</sup>  | 3.047    |
| H(3)  | H(23) <sup>6)</sup>  | 3.557    | H(4)  | O(1)                 | 3.024    |
| H(4)  | C(17) <sup>6)</sup>  | 3.594    | H(4)  | C(31)                | 3.236    |
| H(4)  | C(48) <sup>6)</sup>  | 3.442    | H(4)  | H(5)                 | 2.900    |
| H(4)  | H(12) <sup>6)</sup>  | 3.102    | H(4)  | H(20) <sup>6)</sup>  | 2.667    |
| H(5)  | Cl(1) <sup>3)</sup>  | 3.169    | H(5)  | C(23) <sup>3)</sup>  | 3.564    |
| H(5)  | C(49) <sup>3)</sup>  | 3.145    | H(5)  | H(4)                 | 2.900    |
| H(5)  | H(30) <sup>3)</sup>  | 3.003    | H(6)  | O(7)                 | 3.005    |
| H(6)  | O(7) <sup>2)</sup>   | 3.351    | H(6)  | C(26)                | 3.305    |
| H(6)  | H(7)                 | 3.565    | H(6)  | H(7) <sup>2)</sup>   | 3.232    |
| H(6)  | H(23) <sup>6)</sup>  | 3.410    | H(6)  | H(28) <sup>6)</sup>  | 3.185    |
| H(6)  | H(30)                | 3.248    | H(7)  | Cl(1) <sup>2)</sup>  | 3.496    |
| H(7)  | O(7) <sup>2)</sup>   | 3.459    | H(7)  | O(8) <sup>5)</sup>   | 2.821    |
| H(7)  | H(6)                 | 3.565    | H(7)  | H(6) <sup>2)</sup>   | 3.232    |
| H(7)  | H(37) <sup>5)</sup>  | 3.480    | H(7)  | H(38)                | 3.438    |
| H(8)  | O(9) <sup>10)</sup>  | 2.672    | H(8)  | C(19) <sup>10)</sup> | 2.990    |
| H(8)  | C(24) <sup>10)</sup> | 3.441    | H(8)  | C(37) <sup>10)</sup> | 3.197    |
| H(8)  | H(2) <sup>10)</sup>  | 3.101    | H(8)  | H(15)                | 3.597    |
| H(8)  | H(25)                | 3.111    | H(8)  | H(26)                | 3.591    |

Table 6. Distances beyond the asymmetric unit out to 3.60 Å (continued)

| atom  | atom                 | distance | atom  | atom                 | distance |
|-------|----------------------|----------|-------|----------------------|----------|
| H(9)  | O(6) <sup>10)</sup>  | 2.784    | H(9)  | C(19) <sup>10)</sup> | 3.490    |
| H(9)  | C(37) <sup>10)</sup> | 3.261    | H(9)  | C(47) <sup>10)</sup> | 3.592    |
| H(9)  | C(51) <sup>4)</sup>  | 3.489    | H(9)  | H(2) <sup>10)</sup>  | 3.271    |
| H(9)  | H(15)                | 3.308    | H(9)  | H(18) <sup>10)</sup> | 3.297    |
| H(9)  | H(24) <sup>4)</sup>  | 2.694    | H(9)  | H(25)                | 3.216    |
| H(9)  | H(27) <sup>4)</sup>  | 3.419    | H(10) | O(1)                 | 2.773    |
| H(10) | H(20) <sup>6)</sup>  | 3.518    | H(11) | O(9) <sup>10)</sup>  | 2.652    |
| H(12) | C(24) <sup>10)</sup> | 3.468    | H(12) | C(25) <sup>10)</sup> | 2.822    |
| H(12) | C(30) <sup>10)</sup> | 3.025    | H(12) | C(36) <sup>10)</sup> | 3.099    |
| H(12) | C(37) <sup>10)</sup> | 3.552    | H(12) | C(42) <sup>10)</sup> | 3.546    |
| H(12) | H(4) <sup>10)</sup>  | 3.102    | H(13) | O(2) <sup>3)</sup>   | 3.027    |
| H(13) | O(3) <sup>10)</sup>  | 3.552    | H(13) | C(36) <sup>10)</sup> | 3.427    |
| H(13) | C(54) <sup>3)</sup>  | 3.261    | H(13) | H(30) <sup>3)</sup>  | 3.313    |
| H(13) | H(31) <sup>3)</sup>  | 2.888    | H(14) | C(21) <sup>4)</sup>  | 3.454    |
| H(14) | H(32) <sup>4)</sup>  | 3.214    | H(14) | H(34) <sup>4)</sup>  | 2.831    |
| H(15) | C(1)                 | 3.514    | H(15) | C(29)                | 3.459    |
| H(15) | C(31)                | 3.323    | H(15) | C(33)                | 3.017    |
| H(15) | C(40)                | 3.136    | H(15) | C(43)                | 2.934    |
| H(15) | H(8)                 | 3.597    | H(15) | H(9)                 | 3.308    |
| H(16) | C(3)                 | 2.946    | H(16) | C(29)                | 3.494    |
| H(16) | C(41)                | 3.476    | H(16) | C(44)                | 3.169    |
| H(16) | H(1)                 | 3.003    | H(17) | Cl(3) <sup>1)</sup>  | 3.096    |
| H(17) | H(18) <sup>7)</sup>  | 3.394    | H(18) | O(2) <sup>12)</sup>  | 3.203    |
| H(18) | C(43) <sup>6)</sup>  | 3.489    | H(18) | C(52) <sup>12)</sup> | 3.414    |
| H(18) | H(1) <sup>12)</sup>  | 3.074    | H(18) | H(3) <sup>3)</sup>   | 3.561    |
| H(18) | H(9) <sup>6)</sup>   | 3.297    | H(18) | H(17) <sup>12)</sup> | 3.394    |
| H(18) | H(26) <sup>12)</sup> | 3.004    | H(18) | H(27) <sup>12)</sup> | 3.203    |
| H(19) | S(2) <sup>3)</sup>   | 3.437    | H(19) | O(9) <sup>3)</sup>   | 3.119    |
| H(19) | O(12) <sup>3)</sup>  | 2.868    | H(19) | C(52) <sup>12)</sup> | 3.258    |
| H(19) | H(1) <sup>12)</sup>  | 3.408    | H(19) | H(2) <sup>4)</sup>   | 2.990    |
| H(19) | H(3) <sup>3)</sup>   | 3.047    | H(19) | H(26) <sup>12)</sup> | 2.610    |
| H(19) | H(27) <sup>12)</sup> | 3.082    | H(19) | H(33) <sup>4)</sup>  | 3.443    |
| H(20) | O(1) <sup>10)</sup>  | 2.727    | H(20) | C(25) <sup>10)</sup> | 3.124    |
| H(20) | C(27) <sup>11)</sup> | 3.341    | H(20) | H(4) <sup>10)</sup>  | 2.667    |
| H(20) | H(10) <sup>10)</sup> | 3.518    | H(20) | H(35) <sup>11)</sup> | 3.333    |
| H(20) | H(36) <sup>11)</sup> | 3.012    | H(20) | H(37) <sup>11)</sup> | 3.128    |
| H(21) | O(2) <sup>3)</sup>   | 3.598    | H(21) | C(27) <sup>11)</sup> | 3.145    |

Table 6. Distances beyond the asymmetric unit out to 3.60 Å (continued)

| atom  | atom                 | distance | atom  | atom                 | distance |
|-------|----------------------|----------|-------|----------------------|----------|
| H(21) | H(29) <sup>111</sup> | 2.702    | H(21) | H(31) <sup>31</sup>  | 2.920    |
| H(21) | H(35) <sup>111</sup> | 2.800    | H(21) | H(36) <sup>111</sup> | 2.805    |
| H(21) | H(37) <sup>111</sup> | 3.342    | H(23) | C(23) <sup>100</sup> | 3.073    |
| H(23) | C(32) <sup>100</sup> | 3.329    | H(23) | C(34) <sup>100</sup> | 3.247    |
| H(23) | C(38) <sup>100</sup> | 2.988    | H(23) | C(42) <sup>100</sup> | 3.423    |
| H(23) | C(49) <sup>100</sup> | 2.896    | H(23) | H(3) <sup>100</sup>  | 3.557    |
| H(23) | H(6) <sup>100</sup>  | 3.410    | H(24) | Cl(3) <sup>91</sup>  | 3.017    |
| H(24) | C(43) <sup>91</sup>  | 3.465    | H(24) | H(9) <sup>91</sup>   | 2.694    |
| H(25) | O(9) <sup>100</sup>  | 3.581    | H(25) | C(40)                | 3.267    |
| H(25) | C(43)                | 3.312    | H(25) | H(8)                 | 3.111    |
| H(25) | H(9)                 | 3.216    | H(25) | H(27) <sup>41</sup>  | 3.397    |
| H(26) | O(9) <sup>100</sup>  | 2.772    | H(26) | C(47) <sup>71</sup>  | 3.232    |
| H(26) | H(1)                 | 3.159    | H(26) | H(8)                 | 3.591    |
| H(26) | H(18) <sup>71</sup>  | 3.004    | H(26) | H(19) <sup>71</sup>  | 2.610    |
| H(27) | C(47) <sup>71</sup>  | 3.491    | H(27) | H(9) <sup>91</sup>   | 3.419    |
| H(27) | H(18) <sup>71</sup>  | 3.203    | H(27) | H(19) <sup>71</sup>  | 3.082    |
| H(27) | H(25) <sup>91</sup>  | 3.397    | H(28) | O(1) <sup>100</sup>  | 3.370    |
| H(28) | O(7) <sup>81</sup>   | 3.497    | H(28) | C(27) <sup>111</sup> | 3.340    |
| H(28) | C(34) <sup>100</sup> | 3.211    | H(28) | C(38) <sup>100</sup> | 3.220    |
| H(28) | H(6) <sup>100</sup>  | 3.185    | H(28) | H(31) <sup>81</sup>  | 3.034    |
| H(28) | H(35) <sup>111</sup> | 3.049    | H(28) | H(37) <sup>111</sup> | 2.865    |
| H(28) | H(38) <sup>100</sup> | 3.184    | H(29) | C(27) <sup>111</sup> | 3.192    |
| H(29) | C(48) <sup>111</sup> | 3.416    | H(29) | C(53) <sup>111</sup> | 3.385    |
| H(29) | C(54) <sup>81</sup>  | 3.571    | H(29) | H(21) <sup>111</sup> | 2.702    |
| H(29) | H(29) <sup>111</sup> | 2.663    | H(29) | H(31) <sup>81</sup>  | 2.689    |
| H(29) | H(35) <sup>111</sup> | 2.509    | H(29) | H(36) <sup>111</sup> | 3.504    |
| H(29) | H(37) <sup>111</sup> | 3.144    | H(30) | S(1) <sup>11</sup>   | 3.323    |
| H(30) | O(8) <sup>11</sup>   | 2.539    | H(30) | C(1) <sup>11</sup>   | 3.051    |
| H(30) | C(31) <sup>11</sup>  | 3.017    | H(30) | H(5) <sup>11</sup>   | 3.003    |
| H(30) | H(6)                 | 3.248    | H(30) | H(13) <sup>11</sup>  | 3.313    |
| H(31) | O(8) <sup>11</sup>   | 3.218    | H(31) | C(17) <sup>11</sup>  | 3.469    |
| H(31) | C(27) <sup>11</sup>  | 3.473    | H(31) | C(48) <sup>11</sup>  | 3.598    |
| H(31) | C(53) <sup>81</sup>  | 3.283    | H(31) | H(13) <sup>11</sup>  | 2.888    |
| H(31) | H(21) <sup>11</sup>  | 2.920    | H(31) | H(28) <sup>81</sup>  | 3.034    |
| H(31) | H(29) <sup>81</sup>  | 2.689    | H(31) | H(35) <sup>11</sup>  | 2.921    |
| H(31) | H(37) <sup>11</sup>  | 3.261    | H(32) | Cl(3) <sup>91</sup>  | 3.507    |
| H(32) | H(14) <sup>91</sup>  | 3.214    | H(33) | Cl(3) <sup>91</sup>  | 3.242    |

Table 6. Distances beyond the asymmetric unit out to 3.60 Å (continued)

| atom  | atom                 | distance | atom  | atom                 | distance |
|-------|----------------------|----------|-------|----------------------|----------|
| H(33) | O(3) <sup>9j</sup>   | 3.568    | H(33) | O(12) <sup>4j</sup>  | 2.474    |
| H(33) | C(36) <sup>9j</sup>  | 3.486    | H(33) | C(37) <sup>9j</sup>  | 3.553    |
| H(33) | H(19) <sup>9j</sup>  | 3.443    | H(33) | H(34) <sup>4j</sup>  | 3.592    |
| H(34) | O(6) <sup>9j</sup>   | 3.402    | H(34) | C(19) <sup>9j</sup>  | 3.022    |
| H(34) | C(24) <sup>9j</sup>  | 3.357    | H(34) | C(25) <sup>9j</sup>  | 3.478    |
| H(34) | C(30) <sup>9j</sup>  | 3.570    | H(34) | C(36) <sup>9j</sup>  | 3.123    |
| H(34) | C(37) <sup>9j</sup>  | 2.874    | H(34) | H(2) <sup>9j</sup>   | 3.425    |
| H(34) | H(14) <sup>9j</sup>  | 2.831    | H(34) | H(33) <sup>9j</sup>  | 3.592    |
| H(35) | C(48) <sup>11j</sup> | 3.207    | H(35) | C(53) <sup>11j</sup> | 3.014    |
| H(35) | H(20) <sup>11j</sup> | 3.333    | H(35) | H(21) <sup>11j</sup> | 2.800    |
| H(35) | H(28) <sup>11j</sup> | 3.049    | H(35) | H(29) <sup>11j</sup> | 2.509    |
| H(35) | H(31) <sup>3j</sup>  | 2.921    | H(36) | Cl(1) <sup>2j</sup>  | 2.957    |
| H(36) | S(1) <sup>5j</sup>   | 3.548    | H(36) | O(1) <sup>5j</sup>   | 3.315    |
| H(36) | O(8) <sup>5j</sup>   | 2.943    | H(36) | C(48) <sup>11j</sup> | 3.243    |
| H(36) | H(20) <sup>11j</sup> | 3.012    | H(36) | H(21) <sup>11j</sup> | 2.805    |
| H(36) | H(29) <sup>11j</sup> | 3.504    | H(37) | S(1) <sup>5j</sup>   | 3.145    |
| H(37) | O(1) <sup>5j</sup>   | 2.793    | H(37) | O(8) <sup>5j</sup>   | 3.052    |
| H(37) | N(1) <sup>5j</sup>   | 3.441    | H(37) | C(48) <sup>11j</sup> | 3.413    |
| H(37) | C(53) <sup>11j</sup> | 3.260    | H(37) | H(7) <sup>5j</sup>   | 3.480    |
| H(37) | H(20) <sup>11j</sup> | 3.128    | H(37) | H(21) <sup>11j</sup> | 3.342    |
| H(37) | H(28) <sup>11j</sup> | 2.865    | H(37) | H(29) <sup>11j</sup> | 3.144    |
| H(37) | H(31) <sup>3j</sup>  | 3.261    | H(37) | H(37) <sup>5j</sup>  | 3.476    |
| H(38) | O(1)                 | 2.692    | H(38) | C(2)                 | 3.372    |
| H(38) | C(26)                | 3.271    | H(38) | C(39)                | 3.142    |
| H(38) | H(7)                 | 3.438    | H(38) | H(28) <sup>6j</sup>  | 3.184    |

Symmetry Operators:

- |                    |                      |
|--------------------|----------------------|
| (1) X+1,Y,Z        | (2) -X+2,-Y,-Z       |
| (3) X-1,Y,Z        | (4) X+1/2-1,-Y+1/2,Z |
| (5) -X+1,-Y,-Z     | (6) X,Y,Z-1          |
| (7) X+1,Y,Z+1      | (8) -X+2,-Y,-Z+1     |
| (9) X+1/2,-Y+1/2,Z | (10) X,Y,Z+1         |
| (11) -X+1,-Y,-Z+1  | (12) X-1,Y,Z-1       |
