# Supplementary material for: Synthesis of new tetra- and pentacyclic, methylenedioxy- and ethylenedioxy-substituted derivatives of the dibenzo[ c , f ][1,2]thiazepine ring system
Source: publisher site journal article supplement (doi:10.3762/bjoc.21.205), 2025-12-09
Supplement: Additional file 2 [file compound 21g structure report.pdf › compound 21g structure report.pdf]

**143734**

**1735-BGE**

Submitted by: Berecz Gabor  
Operator: Dancso Andras

X-ray Structure Report

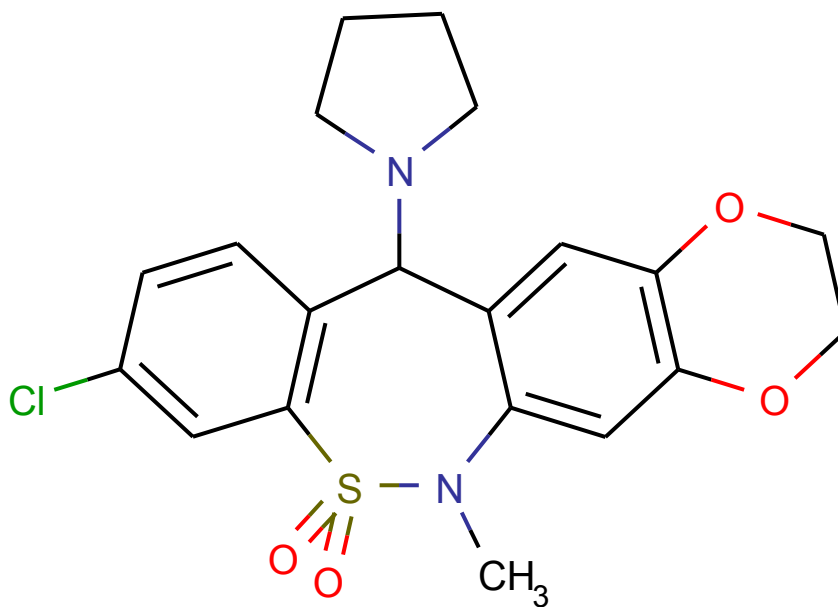

October 21, 2024

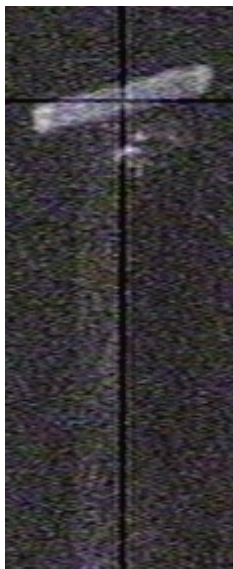

Fig. 1. The crystal

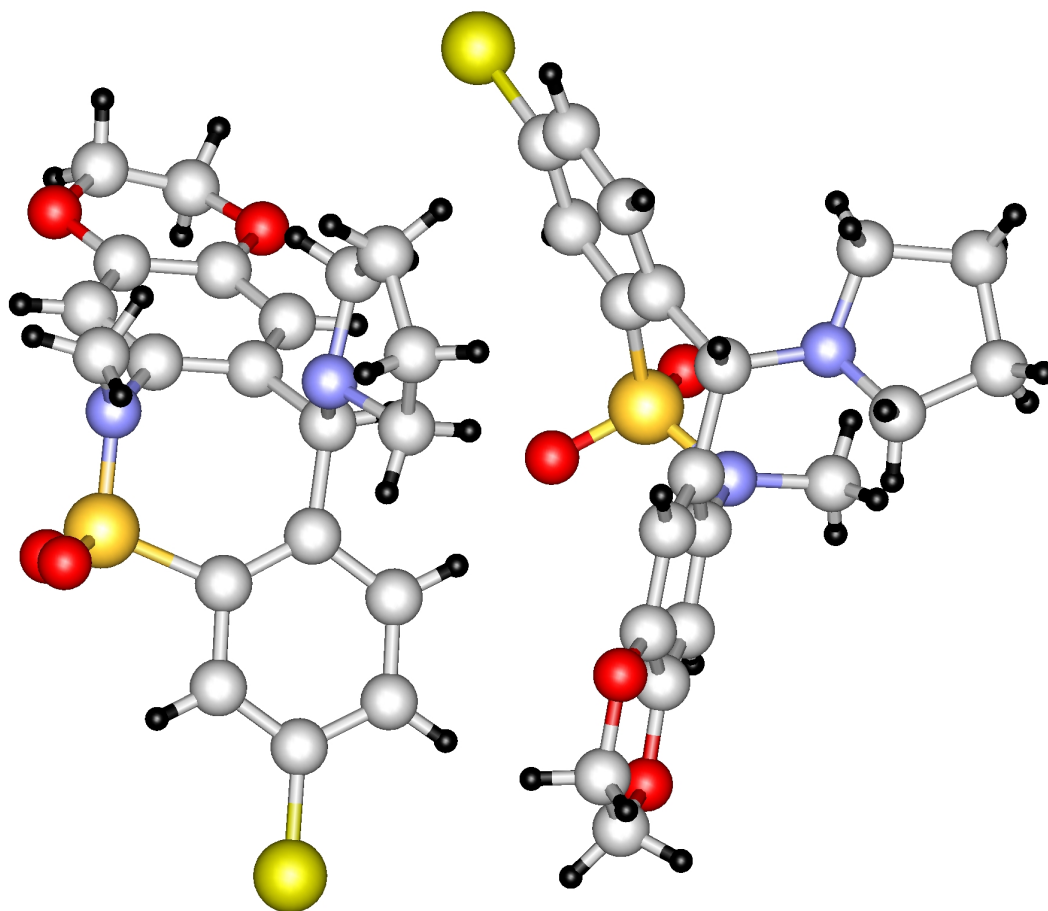

Fig. 2. Molecules in pair (hydrogens were generated by the software)

Fig. 3. Fragment 1

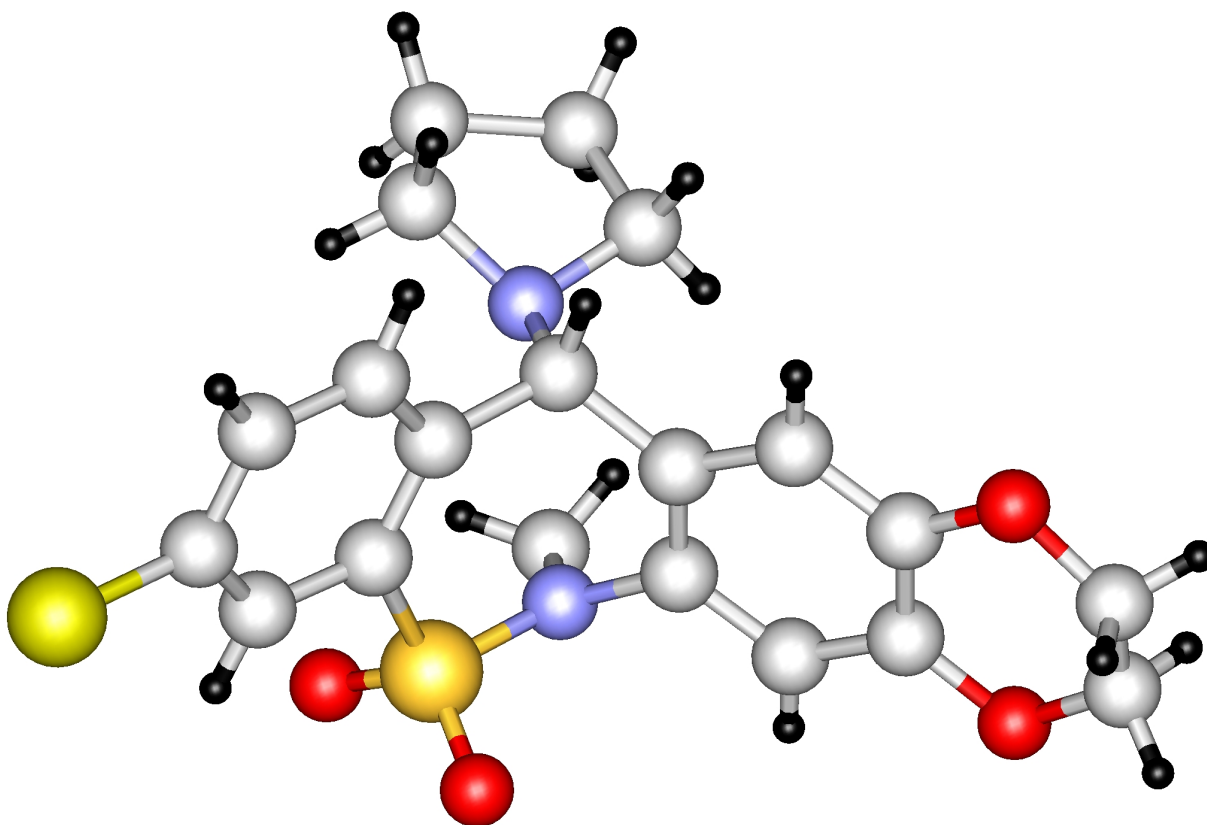

Fig. 4. Fragment 2

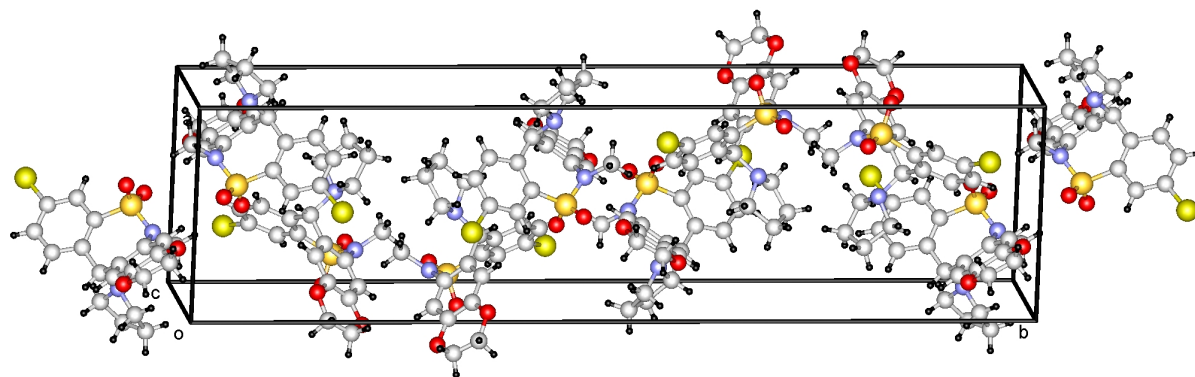

Fig. 5 Packing

## *Experimental*

### Data Collection

A colorless prism crystal of  $C_{20}H_{21}ClN_2O_4S$  having approximate dimensions of 0.36 x 0.04 x 0.04 mm was mounted on a cactus needle. All measurements were made on a Rigaku RAXIS RAPID imaging plate area detector with graphite monochromated Cu-K $\alpha$  radiation.

Indexing was performed from 4 oscillations that were exposed for 900 seconds. The crystal-to-detector distance was 127.40 mm.

Cell constants and an orientation matrix for data collection corresponded to a primitive monoclinic cell with dimensions:

$$\begin{aligned}a &= 10.3705(8) \text{ \AA} \\b &= 37.377(3) \text{ \AA} \quad \beta = 104.647(3)^\circ \\c &= 10.6257(8) \text{ \AA} \\V &= 3984.8(5) \text{ \AA}^3\end{aligned}$$

For  $Z = 8$  and F.W. = 420.91, the calculated density is 1.403 g/cm<sup>3</sup>. The systematic absences of:

$$\begin{aligned}h0l: l \pm 2n \\0k0: k \pm 2n\end{aligned}$$

uniquely determine the space group to be:

$$P2_1/c \text{ (\#14)}$$

The data were collected at a temperature of  $20 \pm 1^\circ\text{C}$  to a maximum  $2\theta$  value of  $143.5^\circ$ . A total of 180 oscillation images were collected. A sweep of data was done using  $\omega$  scans from  $20.0$  to  $200.0^\circ$  in  $5.0^\circ$  step, at  $\chi=0.0^\circ$  and  $\phi = 0.0^\circ$ . The exposure rate was 180.0 [sec./ $^\circ$ ]. A second sweep was performed using  $\omega$  scans from  $20.0$  to  $200.0^\circ$  in  $5.0^\circ$  step, at  $\chi=54.0^\circ$  and  $\phi = 0.0^\circ$ . The exposure rate was 180.0 [sec./ $^\circ$ ]. Another sweep was performed using  $\omega$  scans from  $20.0$  to  $200.0^\circ$  in  $5.0^\circ$  step, at  $\chi=54.0^\circ$  and  $\phi = 90.0^\circ$ . The exposure rate was 180.0 [sec./ $^\circ$ ]. Another sweep was performed using  $\omega$  scans from  $20.0$  to  $200.0^\circ$  in  $5.0^\circ$  step, at  $\chi=54.0^\circ$  and  $\phi = 180.0^\circ$ . The exposure rate was 180.0 [sec./ $^\circ$ ]. Another sweep was performed using  $\omega$  scans from  $20.0$  to  $200.0^\circ$  in  $5.0^\circ$  step, at  $\chi=54.0^\circ$  and  $\phi = 270.0^\circ$ . The exposure rate was 180.0 [sec./ $^\circ$ ]. The crystal-to-detector distance was 127.40 mm. Readout was performed in the 0.100 mm pixel mode.



## Data Reduction

Of the 44929 reflections that were collected, 7615 were unique ( $R_{\text{int}} = 0.097$ ).

The linear absorption coefficient,  $\mu$ , for Cu-K $\alpha$  radiation is 29.286 cm<sup>-1</sup>. An empirical absorption correction was applied which resulted in transmission factors ranging from 0.706 to 0.884. The data were corrected for Lorentz and polarization effects.

## Structure Solution and Refinement

The structure was solved by direct methods<sup>1</sup> and expanded using Fourier techniques<sup>2</sup>. The non-hydrogen atoms were refined anisotropically. Hydrogen atoms were refined using the riding model. The final cycle of full-matrix least-squares refinement<sup>3</sup> on F was based on 20815 observed reflections ( $I > 2.00\sigma(I)$ ) and 547 variable parameters and converged (largest parameter shift was 0.00 times its esd) with unweighted and weighted agreement factors of:

$$R = \Sigma ||F_o| - |F_c|| / \Sigma |F_o| = 0.0779$$

$$R_w = [ \Sigma w (|F_o| - |F_c|)^2 / \Sigma w F_o^2 ]^{1/2} = 0.0900$$

The standard deviation of an observation of unit weight<sup>4</sup> was 2.65. Unit weights were used. Plots of  $\Sigma w (|F_o| - |F_c|)^2$  versus  $|F_o|$ , reflection order in data collection,  $\sin \theta/\lambda$  and various classes of indices showed no unusual trends. The maximum and minimum peaks on the final difference Fourier map corresponded to 5.03 and -12.60 e<sup>-</sup>/Å<sup>3</sup>, respectively.

Neutral atom scattering factors were taken from Cromer and Waber<sup>5</sup>. Anomalous dispersion effects were included in Fcalc<sup>6</sup>; the values for  $\Delta f'$  and  $\Delta f''$  were those of Creagh and McAuley<sup>7</sup>. The values for the mass attenuation coefficients are those of Creagh and Hubbell<sup>8</sup>. All calculations were performed using the CrystalStructure<sup>9,10</sup> crystallographic software package.

## *References*

- (1) SIR92: Altomare, A., Cascarano, G., Giacovazzo, C., Guagliardi, A., Burla, M., Polidori, G., and Camalli, M. (1994) J. Appl. Cryst., 27, 435.
- (2) DIRDIF99: Beurskens, P.T., Admiraal, G., Beurskens, G., Bosman, W.P., de Gelder, R., Israel, R. and Smits, J.M.M.(1999). The DIRDIF-99 program system, Technical Report of the Crystallography Laboratory, University of Nijmegen, The Netherlands.

(3) Least Squares function minimized:

$$\sum w(|F_o| - |F_c|)^2 \quad \text{where } w = \text{Least Squares weights.}$$

(4) Standard deviation of an observation of unit weight:

$$[\sum w(|F_o| - |F_c|)^2 / (N_o - N_v)]^{1/2}$$

where:  $N_o$  = number of observations

$N_v$  = number of variables

(5) Cromer, D. T. & Waber, J. T.; "International Tables for X-ray Crystallography", Vol. IV, The Kynoch Press, Birmingham, England, Table 2.2 A (1974).

(6) Ibers, J. A. & Hamilton, W. C.; Acta Crystallogr., 17, 781 (1964).

(7) Creagh, D. C. & McAuley, W.J. ; "International Tables for Crystallography", Vol C, (A.J.C. Wilson, ed.), Kluwer Academic Publishers, Boston, Table 4.2.6.8, pages 219-222 (1992).

(8) Creagh, D. C. & Hubbell, J.H.; "International Tables for Crystallography", Vol C, (A.J.C. Wilson, ed.), Kluwer Academic Publishers, Boston, Table 4.2.4.3, pages 200-206 (1992).

(9) CrystalStructure 3.7.0: Crystal Structure Analysis Package, Rigaku and Rigaku/MSK (2000-2005). 9009 New Trails Dr. The Woodlands TX 77381 USA.

(10) CRYSTALS Issue 10: Watkin, D.J., Prout, C.K. Carruthers, J.R. & Betteridge, P.W. Chemical Crystallography Laboratory, Oxford, UK. (1996)

## EXPERIMENTAL DETAILS

### A. Crystal Data

|                         |                                                                                                                                                            |
|-------------------------|------------------------------------------------------------------------------------------------------------------------------------------------------------|
| Empirical Formula       | $\text{C}_{20}\text{H}_{21}\text{ClN}_2\text{O}_4\text{S}$                                                                                                 |
| Formula Weight          | 420.91                                                                                                                                                     |
| Crystal Color, Habit    | colorless, prism                                                                                                                                           |
| Crystal Dimensions      | 0.36 X 0.04 X 0.04 mm                                                                                                                                      |
| Crystal System          | monoclinic                                                                                                                                                 |
| Lattice Type            | Primitive                                                                                                                                                  |
| Indexing Images         | 4 oscillations @ 900.0 seconds                                                                                                                             |
| Detector Position       | 127.40 mm                                                                                                                                                  |
| Pixel Size              | 0.100 mm                                                                                                                                                   |
| Lattice Parameters      | $a = 10.3705(8) \text{ \AA}$<br>$b = 37.377(3) \text{ \AA}$<br>$c = 10.6257(8) \text{ \AA}$<br>$\beta = 104.647(3)^\circ$<br>$V = 3984.8(5) \text{ \AA}^3$ |
| Space Group             | $P2_1/c$ (#14)                                                                                                                                             |
| Z value                 | 8                                                                                                                                                          |
| D <sub>calc</sub>       | 1.403 g/cm <sup>3</sup>                                                                                                                                    |
| F <sub>000</sub>        | 1760.00                                                                                                                                                    |
| $\mu(\text{CuK}\alpha)$ | 29.286 cm <sup>-1</sup>                                                                                                                                    |

## B. Intensity Measurements

|                                                           |                                                                       |
|-----------------------------------------------------------|-----------------------------------------------------------------------|
| Diffractometer                                            | Rigaku RAXIS-RAPID                                                    |
| Radiation                                                 | CuK $\alpha$ ( $\lambda$ = 1.54187 Å)<br>graphite monochromated       |
| Detector Aperture                                         | 280 mm x 256 mm                                                       |
| Data Images                                               | 180 exposures                                                         |
| $\omega$ oscillation Range ( $\chi$ =0.0, $\phi$ =0.0)    | 20.0 - 200.0°                                                         |
| Exposure Rate                                             | 180.0 sec./°                                                          |
| $\omega$ oscillation Range ( $\chi$ =54.0, $\phi$ =0.0)   | 20.0 - 200.0°                                                         |
| Exposure Rate                                             | 180.0 sec./°                                                          |
| $\omega$ oscillation Range ( $\chi$ =54.0, $\phi$ =90.0)  | 20.0 - 200.0°                                                         |
| Exposure Rate                                             | 180.0 sec./°                                                          |
| $\omega$ oscillation Range ( $\chi$ =54.0, $\phi$ =180.0) | 20.0 - 200.0°                                                         |
| Exposure Rate                                             | 180.0 sec./°                                                          |
| $\omega$ oscillation Range ( $\chi$ =54.0, $\phi$ =270.0) | 20.0 - 200.0°                                                         |
| Exposure Rate                                             | 180.0 sec./°                                                          |
| Detector Position                                         | 127.40 mm                                                             |
| Pixel Size                                                | 0.100 mm                                                              |
| $2\theta_{\text{max}}$                                    | 143.5°                                                                |
| No. of Reflections Measured                               | Total: 44929<br>Unique: 7615 ( $R_{\text{int}}$ = 0.097)              |
| Corrections                                               | Lorentz-polarization<br>Absorption<br>(trans. factors: 0.706 - 0.884) |

### C. Structure Solution and Refinement

|                                          |                                |
|------------------------------------------|--------------------------------|
| Structure Solution                       | Direct Methods (SIR92)         |
| Refinement                               | Full-matrix least-squares on F |
| Function Minimized                       | $\Sigma w ( Fo  -  Fc )^2$     |
| Least Squares Weights                    | 1                              |
| $2\theta_{\text{max}}$ cutoff            | 143.5 $^{\circ}$               |
| Anomalous Dispersion                     | All non-hydrogen atoms         |
| No. Observations ( $I > 2.00\sigma(I)$ ) | 20815                          |
| No. Variables                            | 547                            |
| Reflection/Parameter Ratio               | 38.05                          |
| Residuals: R ( $I > 2.00\sigma(I)$ )     | 0.0779                         |
| Residuals: Rw ( $I > 2.00\sigma(I)$ )    | 0.0900                         |
| Goodness of Fit Indicator                | 2.648                          |
| Max Shift/Error in Final Cycle           | 0.000                          |
| Maximum peak in Final Diff. Map          | 5.03 e $^{-}/\text{\AA}^3$     |
| Minimum peak in Final Diff. Map          | -12.60 e $^{-}/\text{\AA}^3$   |

Table 1. Atomic coordinates and B<sub>iso</sub>/B<sub>eq</sub>

| atom  | x           | y           | z           | B <sub>eq</sub> |
|-------|-------------|-------------|-------------|-----------------|
| Cl(1) | 0.47269(17) | 0.18004(4)  | 0.21443(16) | 8.24(5)         |
| Cl(3) | 0.23431(17) | 0.06614(5)  | 1.13662(17) | 8.48(5)         |
| S(1)  | 0.15037(17) | 0.18839(4)  | 0.87890(16) | 4.36(4)         |
| S(2)  | 0.54571(13) | 0.06206(4)  | 0.50070(14) | 3.77(4)         |
| O(1)  | 0.6463(4)   | 0.02046(12) | 1.0420(4)   | 6.89(14)        |
| O(5)  | 0.4413(2)   | 0.07061(8)  | 0.5609(3)   | 4.52(10)        |
| O(6)  | 0.1858(3)   | 0.20709(9)  | 0.9991(3)   | 6.18(12)        |
| O(7)  | 0.5128(3)   | 0.04380(9)  | 0.3776(3)   | 4.76(10)        |
| O(8)  | -0.0743(3)  | 0.21223(10) | 0.3300(4)   | 5.84(12)        |
| O(9)  | 0.0882(4)   | 0.15588(11) | 0.2715(4)   | 6.30(13)        |
| O(10) | 0.0147(3)   | 0.17708(9)  | 0.8299(3)   | 5.42(11)        |
| O(12) | 0.7992(4)   | 0.08509(12) | 1.1111(5)   | 7.83(15)        |
| N(1)  | 0.1909(3)   | 0.21290(12) | 0.7709(4)   | 3.83(13)        |
| N(2)  | 0.9146(4)   | 0.07639(11) | 0.6097(4)   | 3.63(12)        |
| N(3)  | 0.4630(4)   | 0.18555(12) | 0.7664(4)   | 4.10(13)        |
| N(13) | 0.6546(3)   | 0.03825(11) | 0.5989(4)   | 3.54(12)        |
| C(1)  | 0.3285(5)   | 0.13595(17) | 0.8202(5)   | 4.03(17)        |
| C(2)  | 0.0624(5)   | 0.21173(12) | 0.5462(5)   | 3.85(16)        |
| C(3)  | 0.7325(5)   | 0.11951(13) | 0.5574(5)   | 2.85(14)        |
| C(17) | 0.6827(5)   | 0.17289(14) | 0.4227(5)   | 4.52(17)        |
| C(20) | 0.7749(5)   | 0.08057(13) | 0.7642(5)   | 3.24(15)        |
| C(21) | 0.5364(5)   | 0.12284(16) | 0.3738(5)   | 4.20(17)        |
| C(22) | 0.2485(5)   | 0.17173(13) | 0.6134(5)   | 3.41(15)        |
| C(24) | 0.1670(5)   | 0.19796(13) | 0.6396(5)   | 3.49(16)        |
| C(25) | 0.2462(5)   | 0.14791(14) | 0.8948(5)   | 4.11(16)        |
| C(26) | 0.7609(5)   | 0.15418(14) | 0.5261(5)   | 3.97(16)        |
| C(27) | 0.2199(4)   | 0.12646(14) | 0.9923(5)   | 3.86(16)        |
| C(28) | 0.6963(5)   | 0.05050(16) | 0.7330(5)   | 3.73(17)        |
| C(29) | 0.5724(6)   | 0.15667(18) | 0.3462(5)   | 5.00(19)        |
| C(30) | 0.8067(5)   | 0.09092(14) | 0.8950(5)   | 4.49(17)        |
| C(31) | 0.7251(4)   | 0.00850(12) | 0.5549(4)   | 4.96(17)        |
| C(32) | 0.0320(5)   | 0.19826(18) | 0.4207(6)   | 4.16(18)        |
| C(33) | 0.3653(5)   | 0.15696(14) | 0.7125(5)   | 4.35(17)        |
| C(34) | 1.0178(5)   | 0.05860(14) | 0.7092(5)   | 5.38(18)        |
| C(35) | 0.5095(5)   | 0.20390(14) | 0.6644(5)   | 5.52(19)        |
| C(36) | 0.2176(5)   | 0.15846(12) | 0.4861(5)   | 3.82(16)        |
| C(37) | 0.6534(4)   | 0.03082(14) | 0.8235(6)   | 4.22(17)        |

Table 1. Atomic coordinates and B<sub>iso</sub>/B<sub>eq</sub> (continued)

| atom  | x          | y           | z         | B <sub>eq</sub> |
|-------|------------|-------------|-----------|-----------------|
| C(38) | 0.6181(5)  | 0.10395(13) | 0.4782(5) | 3.64(15)        |
| C(39) | 0.9907(5)  | 0.09473(14) | 0.5301(5) | 5.43(19)        |
| C(40) | 0.2713(6)  | 0.09272(17) | 1.0174(6) | 5.23(19)        |
| C(41) | 0.1120(6)  | 0.17127(17) | 0.3923(5) | 3.87(17)        |
| C(42) | 0.6893(6)  | 0.04074(19) | 0.9517(7) | 4.8(2)          |
| C(43) | 0.7613(6)  | 0.0715(2)   | 0.9879(6) | 4.7(2)          |
| C(44) | 1.0909(5)  | 0.06641(18) | 0.5113(7) | 7.4(2)          |
| C(45) | 0.8308(4)  | 0.10043(13) | 0.6657(5) | 3.80(15)        |
| C(46) | 1.1088(5)  | 0.04274(16) | 0.6316(6) | 6.2(2)          |
| C(47) | 0.3812(5)  | 0.10197(19) | 0.8484(5) | 5.34(19)        |
| C(48) | 0.3530(5)  | 0.07985(17) | 0.9438(6) | 5.6(2)          |
| C(49) | 0.7492(11) | 0.0641(3)   | 1.1957(8) | 16.3(4)         |
| C(50) | 0.6364(5)  | 0.22260(16) | 0.7388(6) | 6.6(2)          |
| C(51) | 0.2695(5)  | 0.24565(12) | 0.8063(5) | 5.38(18)        |
| C(52) | 0.5850(6)  | 0.17193(16) | 0.8565(5) | 6.1(2)          |
| C(53) | 0.6806(5)  | 0.20348(19) | 0.8682(6) | 7.8(2)          |
| C(54) | -0.0278(9) | 0.1675(2)   | 0.1867(8) | 10.5(3)         |
| C(55) | -0.0903(9) | 0.1963(2)   | 0.2084(7) | 14.2(3)         |
| C(56) | 0.6891(9)  | 0.0335(2)   | 1.1680(8) | 11.6(3)         |
| H(1)  | 0.0101     | 0.2305      | 0.5677    | 4.67            |
| H(2)  | 0.7041     | 0.1967      | 0.4044    | 5.43            |
| H(3)  | 0.4578     | 0.1120      | 0.3222    | 5.01            |
| H(4)  | 0.8379     | 0.1651      | 0.5800    | 4.67            |
| H(5)  | 0.1667     | 0.1358      | 1.0455    | 4.63            |
| H(6)  | 0.2714     | 0.1401      | 0.4645    | 4.66            |
| H(7)  | 0.6002     | 0.0101      | 0.7971    | 5.11            |
| H(8)  | 0.4416     | 0.0938      | 0.8008    | 6.43            |
| H(9)  | 0.3874     | 0.0562      | 0.9573    | 6.17            |
| H(10) | 0.4090     | 0.1406      | 0.6688    | 5.32            |
| H(11) | 0.8887     | 0.1184      | 0.7121    | 4.50            |
| H(12) | 0.8598     | 0.1117      | 0.9207    | 5.10            |
| H(13) | 1.0650     | 0.0753      | 0.7714    | 6.64            |
| H(14) | 0.9795     | 0.0407      | 0.7520    | 6.63            |
| H(15) | 0.5285     | 0.1875      | 0.6032    | 6.76            |
| H(16) | 0.4433     | 0.2203      | 0.6208    | 6.77            |
| H(17) | 0.9330     | 0.1019      | 0.4496    | 6.79            |
| H(18) | 1.0357     | 0.1151      | 0.5736    | 6.80            |

Table 1. Atomic coordinates and  $B_{iso}/B_{eq}$  (continued)

| atom  | x       | y       | z      | $B_{eq}$ |
|-------|---------|---------|--------|----------|
| H(19) | 1.0544  | 0.0528  | 0.4350 | 9.30     |
| H(20) | 1.1729  | 0.0768  | 0.5056 | 9.30     |
| H(21) | 1.1994  | 0.0432  | 0.6799 | 7.22     |
| H(22) | 1.0829  | 0.0188  | 0.6082 | 7.22     |
| H(23) | 0.8151  | 0.0629  | 1.2760 | 19.62    |
| H(24) | 0.6763  | 0.0781  | 1.2064 | 19.62    |
| H(25) | 0.7035  | 0.2213  | 0.6925 | 7.64     |
| H(26) | 0.6170  | 0.2470  | 0.7516 | 7.63     |
| H(27) | 0.5688  | 0.1656  | 0.9377 | 7.17     |
| H(28) | 0.6196  | 0.1518  | 0.8213 | 7.18     |
| H(29) | 0.7711  | 0.1963  | 0.8831 | 8.87     |
| H(30) | 0.6709  | 0.2187  | 0.9369 | 8.88     |
| H(31) | -0.0105 | 0.1695  | 0.1034 | 12.35    |
| H(32) | -0.0914 | 0.1491  | 0.1852 | 12.37    |
| H(33) | -0.1836 | 0.1931  | 0.1746 | 15.93    |
| H(34) | -0.0593 | 0.2140  | 0.1590 | 15.93    |
| H(35) | 0.6173  | 0.0307  | 1.2077 | 14.05    |
| H(36) | 0.7594  | 0.0177  | 1.2081 | 14.05    |
| H(37) | 0.6758  | -0.0129 | 0.5560 | 6.23     |
| H(38) | 0.8114  | 0.0060  | 0.6118 | 6.23     |
| H(39) | 0.7327  | 0.0129  | 0.4691 | 6.22     |
| H(40) | 0.2111  | 0.2653  | 0.8043 | 6.51     |
| H(41) | 0.3206  | 0.2494  | 0.7448 | 6.51     |
| H(42) | 0.3274  | 0.2435  | 0.8909 | 6.51     |

$$B_{eq} = 8/3 \pi^2 (U_{11}(aa^*)^2 + U_{22}(bb^*)^2 + U_{33}(cc^*)^2 + 2U_{12}(aa^*bb^*)\cos \gamma + 2U_{13}(aa^*cc^*)\cos \beta + 2U_{23}(bb^*cc^*)\cos \alpha)$$



Table 2. Anisotropic displacement parameters

| atom  | U <sub>11</sub> | U <sub>22</sub> | U <sub>33</sub> | U <sub>12</sub> | U <sub>13</sub> | U <sub>23</sub> |
|-------|-----------------|-----------------|-----------------|-----------------|-----------------|-----------------|
| Cl(1) | 0.1180(15)      | 0.0839(14)      | 0.0903(13)      | 0.0095(11)      | -0.0124(11)     | 0.0246(11)      |
| Cl(3) | 0.1292(16)      | 0.0931(14)      | 0.0985(14)      | 0.0055(12)      | 0.0260(12)      | 0.0418(12)      |
| S(1)  | 0.0613(11)      | 0.0569(11)      | 0.0489(10)      | 0.0163(9)       | 0.0165(9)       | 0.0006(9)       |
| S(2)  | 0.0418(9)       | 0.0520(10)      | 0.0507(10)      | -0.0113(8)      | 0.0138(8)       | -0.0091(9)      |
| O(1)  | 0.105(3)        | 0.116(4)        | 0.047(3)        | 0.010(2)        | 0.030(2)        | 0.026(3)        |
| O(5)  | 0.037(2)        | 0.069(2)        | 0.071(2)        | -0.0068(19)     | 0.024(2)        | -0.002(2)       |
| O(6)  | 0.114(3)        | 0.076(3)        | 0.045(2)        | 0.020(2)        | 0.020(2)        | -0.009(2)       |
| O(7)  | 0.073(2)        | 0.058(2)        | 0.049(2)        | -0.017(2)       | 0.013(2)        | -0.013(2)       |
| O(8)  | 0.057(3)        | 0.095(3)        | 0.060(3)        | 0.001(2)        | -0.004(2)       | 0.006(2)        |
| O(9)  | 0.076(3)        | 0.108(3)        | 0.050(3)        | -0.001(2)       | 0.008(2)        | -0.004(3)       |
| O(10) | 0.048(2)        | 0.076(2)        | 0.085(3)        | 0.014(2)        | 0.021(2)        | 0.014(2)        |
| O(12) | 0.114(3)        | 0.136(4)        | 0.048(3)        | -0.004(3)       | 0.019(2)        | -0.013(3)       |
| N(1)  | 0.049(3)        | 0.050(3)        | 0.043(3)        | 0.006(2)        | 0.005(2)        | -0.008(2)       |
| N(2)  | 0.025(2)        | 0.038(3)        | 0.074(3)        | 0.002(2)        | 0.011(2)        | 0.001(2)        |
| N(3)  | 0.042(3)        | 0.060(3)        | 0.050(3)        | 0.010(2)        | 0.005(2)        | -0.003(2)       |
| N(13) | 0.045(3)        | 0.043(3)        | 0.049(3)        | -0.005(2)       | 0.016(2)        | -0.001(2)       |
| C(1)  | 0.041(3)        | 0.055(4)        | 0.050(4)        | 0.014(3)        | -0.002(3)       | -0.004(3)       |
| C(2)  | 0.059(4)        | 0.025(3)        | 0.065(4)        | 0.009(2)        | 0.021(3)        | -0.004(3)       |
| C(3)  | 0.031(3)        | 0.022(3)        | 0.059(4)        | 0.002(2)        | 0.019(3)        | -0.009(3)       |
| C(17) | 0.069(4)        | 0.034(4)        | 0.070(4)        | -0.000(3)       | 0.019(3)        | 0.020(3)        |
| C(20) | 0.038(3)        | 0.033(3)        | 0.057(4)        | -0.001(2)       | 0.022(3)        | -0.000(3)       |
| C(21) | 0.037(3)        | 0.058(4)        | 0.064(4)        | -0.019(3)       | 0.012(3)        | -0.022(3)       |
| C(22) | 0.037(3)        | 0.040(3)        | 0.046(4)        | 0.007(2)        | -0.000(3)       | 0.004(3)        |
| C(24) | 0.050(4)        | 0.026(3)        | 0.055(4)        | 0.012(2)        | 0.012(3)        | 0.008(3)        |
| C(25) | 0.050(4)        | 0.056(4)        | 0.049(4)        | -0.009(3)       | 0.010(3)        | 0.008(3)        |
| C(26) | 0.046(3)        | 0.036(3)        | 0.066(4)        | -0.007(3)       | 0.010(3)        | -0.003(3)       |
| C(27) | 0.044(3)        | 0.047(4)        | 0.056(4)        | 0.005(3)        | 0.013(3)        | -0.010(3)       |
| C(28) | 0.028(3)        | 0.061(4)        | 0.058(4)        | 0.004(3)        | 0.020(3)        | 0.006(3)        |
| C(29) | 0.059(4)        | 0.068(5)        | 0.063(4)        | -0.020(3)       | 0.015(3)        | -0.017(4)       |
| C(30) | 0.061(4)        | 0.059(4)        | 0.042(4)        | 0.004(3)        | -0.003(3)       | -0.026(3)       |
| C(31) | 0.071(4)        | 0.050(4)        | 0.076(4)        | 0.002(3)        | 0.033(3)        | -0.011(3)       |
| C(32) | 0.036(4)        | 0.071(5)        | 0.053(4)        | -0.013(3)       | 0.014(3)        | -0.006(4)       |
| C(33) | 0.067(4)        | 0.046(4)        | 0.055(4)        | 0.005(3)        | 0.022(3)        | -0.008(3)       |
| C(34) | 0.059(4)        | 0.071(4)        | 0.080(5)        | 0.016(3)        | 0.028(4)        | -0.008(3)       |
| C(35) | 0.054(4)        | 0.089(5)        | 0.071(5)        | -0.002(3)       | 0.024(3)        | -0.007(4)       |
| C(36) | 0.045(4)        | 0.050(4)        | 0.054(4)        | -0.000(3)       | 0.018(3)        | -0.009(3)       |
| C(37) | 0.046(3)        | 0.050(4)        | 0.066(4)        | -0.002(3)       | 0.018(3)        | -0.010(3)       |

Table 2. Anisotropic displacement parameters (continued)

| atom  | U <sub>11</sub> | U <sub>22</sub> | U <sub>33</sub> | U <sub>12</sub> | U <sub>13</sub> | U <sub>23</sub> |
|-------|-----------------|-----------------|-----------------|-----------------|-----------------|-----------------|
| C(38) | 0.043(3)        | 0.053(4)        | 0.044(3)        | 0.009(3)        | 0.014(3)        | -0.002(3)       |
| C(39) | 0.048(4)        | 0.066(4)        | 0.101(5)        | -0.016(3)       | 0.035(4)        | 0.002(4)        |
| C(40) | 0.075(5)        | 0.039(4)        | 0.076(5)        | 0.005(3)        | 0.003(4)        | -0.002(3)       |
| C(41) | 0.050(4)        | 0.072(5)        | 0.026(3)        | -0.023(3)       | 0.011(3)        | -0.009(3)       |
| C(42) | 0.063(4)        | 0.064(5)        | 0.056(5)        | 0.005(3)        | 0.015(4)        | 0.005(4)        |
| C(43) | 0.071(5)        | 0.085(6)        | 0.023(4)        | 0.027(4)        | 0.008(3)        | -0.008(4)       |
| C(44) | 0.061(4)        | 0.090(5)        | 0.144(7)        | 0.013(4)        | 0.053(4)        | -0.004(5)       |
| C(45) | 0.029(3)        | 0.044(4)        | 0.069(4)        | 0.012(2)        | 0.009(3)        | 0.007(3)        |
| C(46) | 0.053(4)        | 0.079(5)        | 0.097(5)        | 0.004(3)        | 0.005(4)        | -0.014(4)       |
| C(47) | 0.060(4)        | 0.079(5)        | 0.065(4)        | 0.025(4)        | 0.018(3)        | 0.007(4)        |
| C(48) | 0.063(4)        | 0.051(4)        | 0.081(5)        | 0.024(3)        | -0.010(4)       | 0.007(4)        |
| C(49) | 0.296(14)       | 0.285(15)       | 0.041(6)        | -0.147(12)      | 0.048(7)        | -0.063(8)       |
| C(50) | 0.051(4)        | 0.086(5)        | 0.104(5)        | -0.006(4)       | 0.006(4)        | -0.022(4)       |
| C(51) | 0.079(4)        | 0.051(4)        | 0.075(4)        | 0.001(3)        | 0.021(3)        | -0.010(3)       |
| C(52) | 0.060(4)        | 0.093(5)        | 0.074(4)        | -0.005(4)       | 0.005(3)        | 0.006(4)        |
| C(53) | 0.039(4)        | 0.145(7)        | 0.098(6)        | 0.002(4)        | -0.014(4)       | -0.006(5)       |
| C(54) | 0.147(9)        | 0.167(9)        | 0.077(7)        | 0.025(7)        | 0.011(6)        | -0.043(6)       |
| C(55) | 0.167(9)        | 0.289(13)       | 0.049(6)        | 0.095(9)        | -0.039(5)       | -0.062(7)       |
| C(56) | 0.171(10)       | 0.210(12)       | 0.064(7)        | -0.010(7)       | 0.040(6)        | 0.012(8)        |

The general temperature factor expression:  $\exp(-2\pi^2(a^2U_{11}h^2 + b^2U_{22}k^2 + c^2U_{33}l^2 + 2a*b*U_{12}hk + 2a*c*U_{13}hl + 2b*c*U_{23}kl))$

Table 3. Bond lengths (Å)

| atom  | atom  | distance | atom  | atom  | distance  |
|-------|-------|----------|-------|-------|-----------|
| Cl(1) | C(29) | 1.749(5) | Cl(3) | C(40) | 1.728(7)  |
| S(1)  | O(6)  | 1.420(3) | S(1)  | O(10) | 1.435(3)  |
| S(1)  | N(1)  | 1.605(5) | S(1)  | C(25) | 1.795(5)  |
| S(2)  | O(5)  | 1.426(3) | S(2)  | O(7)  | 1.438(3)  |
| S(2)  | N(13) | 1.600(4) | S(2)  | C(38) | 1.778(5)  |
| O(1)  | C(42) | 1.382(9) | O(1)  | C(56) | 1.387(10) |
| O(8)  | C(32) | 1.371(6) | O(8)  | C(55) | 1.393(9)  |
| O(9)  | C(41) | 1.371(7) | O(9)  | C(54) | 1.378(9)  |
| O(12) | C(43) | 1.366(8) | O(12) | C(49) | 1.388(12) |
| N(1)  | C(24) | 1.465(7) | N(1)  | C(51) | 1.466(6)  |
| N(2)  | C(34) | 1.461(6) | N(2)  | C(39) | 1.465(7)  |
| N(2)  | C(45) | 1.476(7) | N(3)  | C(33) | 1.484(7)  |
| N(3)  | C(35) | 1.464(8) | N(3)  | C(52) | 1.471(6)  |
| N(13) | C(28) | 1.455(7) | N(13) | C(31) | 1.470(6)  |
| C(1)  | C(25) | 1.378(8) | C(1)  | C(33) | 1.514(8)  |
| C(1)  | C(47) | 1.385(9) | C(2)  | C(24) | 1.372(7)  |
| C(2)  | C(32) | 1.385(8) | C(2)  | H(1)  | 0.950     |
| C(3)  | C(26) | 1.388(7) | C(3)  | C(38) | 1.396(6)  |
| C(3)  | C(45) | 1.510(6) | C(17) | C(26) | 1.380(7)  |
| C(17) | C(29) | 1.366(7) | C(17) | H(2)  | 0.950     |
| C(20) | C(28) | 1.379(7) | C(20) | C(30) | 1.399(8)  |
| C(20) | C(45) | 1.512(8) | C(21) | C(29) | 1.371(9)  |
| C(21) | C(38) | 1.404(7) | C(21) | H(3)  | 0.950     |
| C(22) | C(24) | 1.368(8) | C(22) | C(33) | 1.495(7)  |
| C(22) | C(36) | 1.399(8) | C(25) | C(27) | 1.391(8)  |
| C(26) | H(4)  | 0.950    | C(27) | C(40) | 1.368(8)  |
| C(27) | H(5)  | 0.950    | C(28) | C(37) | 1.371(9)  |
| C(30) | C(43) | 1.400(9) | C(30) | H(12) | 0.950     |
| C(31) | H(37) | 0.950    | C(31) | H(38) | 0.950     |
| C(31) | H(39) | 0.950    | C(32) | C(41) | 1.387(9)  |
| C(33) | H(10) | 0.950    | C(34) | C(46) | 1.521(9)  |
| C(34) | H(13) | 0.950    | C(34) | H(14) | 0.950     |
| C(35) | C(50) | 1.523(7) | C(35) | H(15) | 0.950     |
| C(35) | H(16) | 0.950    | C(36) | C(41) | 1.367(7)  |
| C(36) | H(6)  | 0.950    | C(37) | C(42) | 1.369(9)  |
| C(37) | H(7)  | 0.950    | C(39) | C(44) | 1.531(8)  |
| C(39) | H(17) | 0.950    | C(39) | H(18) | 0.950     |

Table 3. Bond lengths (Å) (continued)

| atom  | atom  | distance  | atom  | atom  | distance  |
|-------|-------|-----------|-------|-------|-----------|
| C(40) | C(48) | 1.377(10) | C(42) | C(43) | 1.372(9)  |
| C(44) | C(46) | 1.527(9)  | C(44) | H(19) | 0.950     |
| C(44) | H(20) | 0.950     | C(45) | H(11) | 0.950     |
| C(46) | H(21) | 0.950     | C(46) | H(22) | 0.950     |
| C(47) | C(48) | 1.395(9)  | C(47) | H(8)  | 0.950     |
| C(48) | H(9)  | 0.950     | C(49) | C(56) | 1.303(15) |
| C(49) | H(23) | 0.950     | C(49) | H(24) | 0.950     |
| C(50) | C(53) | 1.514(9)  | C(50) | H(25) | 0.950     |
| C(50) | H(26) | 0.950     | C(51) | H(40) | 0.950     |
| C(51) | H(41) | 0.950     | C(51) | H(42) | 0.950     |
| C(52) | C(53) | 1.526(9)  | C(52) | H(27) | 0.950     |
| C(52) | H(28) | 0.950     | C(53) | H(29) | 0.950     |
| C(53) | H(30) | 0.950     | C(54) | C(55) | 1.307(14) |
| C(54) | H(31) | 0.950     | C(54) | H(32) | 0.950     |
| C(55) | H(33) | 0.950     | C(55) | H(34) | 0.950     |
| C(56) | H(35) | 0.950     | C(56) | H(36) | 0.950     |

Table 4. Bond angles ( $^{\circ}$ )

| atom  | atom  | atom  | angle      | atom  | atom  | atom  | angle    |
|-------|-------|-------|------------|-------|-------|-------|----------|
| O(6)  | S(1)  | O(10) | 118.6(2)   | O(6)  | S(1)  | N(1)  | 107.9(2) |
| O(6)  | S(1)  | C(25) | 108.6(2)   | O(10) | S(1)  | N(1)  | 108.6(2) |
| O(10) | S(1)  | C(25) | 104.8(2)   | N(1)  | S(1)  | C(25) | 108.0(2) |
| O(5)  | S(2)  | O(7)  | 118.81(19) | O(5)  | S(2)  | N(13) | 108.8(2) |
| O(5)  | S(2)  | C(38) | 104.9(2)   | O(7)  | S(2)  | N(13) | 107.2(2) |
| O(7)  | S(2)  | C(38) | 107.9(2)   | N(13) | S(2)  | C(38) | 109.0(2) |
| C(42) | O(1)  | C(56) | 113.4(6)   | C(32) | O(8)  | C(55) | 112.0(5) |
| C(41) | O(9)  | C(54) | 113.6(5)   | C(43) | O(12) | C(49) | 110.3(6) |
| S(1)  | N(1)  | C(24) | 116.9(3)   | S(1)  | N(1)  | C(51) | 121.5(3) |
| C(24) | N(1)  | C(51) | 120.8(4)   | C(34) | N(2)  | C(39) | 103.1(4) |
| C(34) | N(2)  | C(45) | 112.5(4)   | C(39) | N(2)  | C(45) | 114.0(4) |
| C(33) | N(3)  | C(35) | 111.9(4)   | C(33) | N(3)  | C(52) | 113.1(4) |
| C(35) | N(3)  | C(52) | 104.7(4)   | S(2)  | N(13) | C(28) | 116.7(3) |
| S(2)  | N(13) | C(31) | 122.6(3)   | C(28) | N(13) | C(31) | 120.1(3) |
| C(25) | C(1)  | C(33) | 125.3(5)   | C(25) | C(1)  | C(47) | 116.2(5) |
| C(33) | C(1)  | C(47) | 118.6(5)   | C(24) | C(2)  | C(32) | 120.4(5) |
| C(24) | C(2)  | H(1)  | 119.9      | C(32) | C(2)  | H(1)  | 119.7    |
| C(26) | C(3)  | C(38) | 116.4(4)   | C(26) | C(3)  | C(45) | 118.7(4) |
| C(38) | C(3)  | C(45) | 124.7(4)   | C(26) | C(17) | C(29) | 118.9(5) |
| C(26) | C(17) | H(2)  | 121.2      | C(29) | C(17) | H(2)  | 119.9    |
| C(28) | C(20) | C(30) | 116.1(5)   | C(28) | C(20) | C(45) | 122.7(5) |
| C(30) | C(20) | C(45) | 121.1(4)   | C(29) | C(21) | C(38) | 119.4(4) |
| C(29) | C(21) | H(3)  | 120.6      | C(38) | C(21) | H(3)  | 120.0    |
| C(24) | C(22) | C(33) | 123.6(5)   | C(24) | C(22) | C(36) | 116.6(4) |
| C(33) | C(22) | C(36) | 119.8(4)   | N(1)  | C(24) | C(2)  | 117.3(5) |
| N(1)  | C(24) | C(22) | 120.2(4)   | C(2)  | C(24) | C(22) | 122.6(5) |
| S(1)  | C(25) | C(1)  | 128.9(4)   | S(1)  | C(25) | C(27) | 110.4(4) |
| C(1)  | C(25) | C(27) | 120.5(5)   | C(3)  | C(26) | C(17) | 123.1(4) |
| C(3)  | C(26) | H(4)  | 117.1      | C(17) | C(26) | H(4)  | 119.8    |
| C(25) | C(27) | C(40) | 122.4(5)   | C(25) | C(27) | H(5)  | 119.0    |
| C(40) | C(27) | H(5)  | 118.5      | N(13) | C(28) | C(20) | 120.2(5) |
| N(13) | C(28) | C(37) | 116.7(4)   | C(20) | C(28) | C(37) | 123.1(5) |
| Cl(1) | C(29) | C(17) | 119.4(4)   | Cl(1) | C(29) | C(21) | 119.6(4) |
| C(17) | C(29) | C(21) | 120.9(5)   | C(20) | C(30) | C(43) | 121.4(5) |
| C(20) | C(30) | H(12) | 119.0      | C(43) | C(30) | H(12) | 119.6    |
| N(13) | C(31) | H(37) | 108.7      | N(13) | C(31) | H(38) | 109.7    |
| N(13) | C(31) | H(39) | 110.0      | H(37) | C(31) | H(38) | 109.5    |

Table 4. Bond angles ( $^{\circ}$ ) (continued)

| atom  | atom  | atom  | angle    | atom  | atom  | atom  | angle    |
|-------|-------|-------|----------|-------|-------|-------|----------|
| H(37) | C(31) | H(39) | 109.5    | H(38) | C(31) | H(39) | 109.5    |
| O(8)  | C(32) | C(2)  | 119.0(5) | O(8)  | C(32) | C(41) | 122.9(5) |
| C(2)  | C(32) | C(41) | 118.1(5) | N(3)  | C(33) | C(1)  | 111.1(4) |
| N(3)  | C(33) | C(22) | 111.0(4) | N(3)  | C(33) | H(10) | 106.7    |
| C(1)  | C(33) | C(22) | 114.2(4) | C(1)  | C(33) | H(10) | 106.2    |
| C(22) | C(33) | H(10) | 107.1    | N(2)  | C(34) | C(46) | 103.1(4) |
| N(2)  | C(34) | H(13) | 111.0    | N(2)  | C(34) | H(14) | 110.4    |
| C(46) | C(34) | H(13) | 110.6    | C(46) | C(34) | H(14) | 112.2    |
| H(13) | C(34) | H(14) | 109.5    | N(3)  | C(35) | C(50) | 103.5(4) |
| N(3)  | C(35) | H(15) | 111.6    | N(3)  | C(35) | H(16) | 109.3    |
| C(50) | C(35) | H(15) | 110.5    | C(50) | C(35) | H(16) | 112.3    |
| H(15) | C(35) | H(16) | 109.5    | C(22) | C(36) | C(41) | 121.7(5) |
| C(22) | C(36) | H(6)  | 119.1    | C(41) | C(36) | H(6)  | 119.2    |
| C(28) | C(37) | C(42) | 119.9(5) | C(28) | C(37) | H(7)  | 119.8    |
| C(42) | C(37) | H(7)  | 120.3    | S(2)  | C(38) | C(3)  | 127.5(4) |
| S(2)  | C(38) | C(21) | 111.0(3) | C(3)  | C(38) | C(21) | 121.2(4) |
| N(2)  | C(39) | C(44) | 103.6(4) | N(2)  | C(39) | H(17) | 110.0    |
| N(2)  | C(39) | H(18) | 111.4    | C(44) | C(39) | H(17) | 111.8    |
| C(44) | C(39) | H(18) | 110.6    | H(17) | C(39) | H(18) | 109.4    |
| Cl(3) | C(40) | C(27) | 121.7(5) | Cl(3) | C(40) | C(48) | 119.9(4) |
| C(27) | C(40) | C(48) | 118.5(6) | O(9)  | C(41) | C(32) | 122.2(5) |
| O(9)  | C(41) | C(36) | 117.2(5) | C(32) | C(41) | C(36) | 120.6(5) |
| O(1)  | C(42) | C(37) | 119.2(5) | O(1)  | C(42) | C(43) | 120.9(6) |
| C(37) | C(42) | C(43) | 119.8(6) | O(12) | C(43) | C(30) | 114.6(5) |
| O(12) | C(43) | C(42) | 125.8(6) | C(30) | C(43) | C(42) | 119.6(6) |
| C(39) | C(44) | C(46) | 103.5(5) | C(39) | C(44) | H(19) | 110.1    |
| C(39) | C(44) | H(20) | 112.0    | C(46) | C(44) | H(19) | 110.1    |
| C(46) | C(44) | H(20) | 111.6    | H(19) | C(44) | H(20) | 109.5    |
| N(2)  | C(45) | C(3)  | 109.4(4) | N(2)  | C(45) | C(20) | 110.4(4) |
| N(2)  | C(45) | H(11) | 106.2    | C(3)  | C(45) | C(20) | 117.1(4) |
| C(3)  | C(45) | H(11) | 106.2    | C(20) | C(45) | H(11) | 106.8    |
| C(34) | C(46) | C(44) | 105.5(4) | C(34) | C(46) | H(21) | 111.5    |
| C(34) | C(46) | H(22) | 109.6    | C(44) | C(46) | H(21) | 109.6    |
| C(44) | C(46) | H(22) | 111.1    | H(21) | C(46) | H(22) | 109.5    |
| C(1)  | C(47) | C(48) | 123.8(6) | C(1)  | C(47) | H(8)  | 117.2    |
| C(48) | C(47) | H(8)  | 118.9    | C(40) | C(48) | C(47) | 118.5(5) |
| C(40) | C(48) | H(9)  | 120.1    | C(47) | C(48) | H(9)  | 121.4    |

Table 4. Bond angles ( $^{\circ}$ ) (continued)

| atom  | atom  | atom  | angle    | atom  | atom  | atom  | angle |
|-------|-------|-------|----------|-------|-------|-------|-------|
| O(12) | C(49) | C(56) | 125.9(8) | O(12) | C(49) | H(23) | 108.0 |
| O(12) | C(49) | H(24) | 101.9    | C(56) | C(49) | H(23) | 110.7 |
| C(56) | C(49) | H(24) | 99.3     | H(23) | C(49) | H(24) | 109.5 |
| C(35) | C(50) | C(53) | 106.2(5) | C(35) | C(50) | H(25) | 110.9 |
| C(35) | C(50) | H(26) | 109.2    | C(53) | C(50) | H(25) | 110.6 |
| C(53) | C(50) | H(26) | 110.5    | H(25) | C(50) | H(26) | 109.5 |
| N(1)  | C(51) | H(40) | 109.4    | N(1)  | C(51) | H(41) | 108.6 |
| N(1)  | C(51) | H(42) | 110.4    | H(40) | C(51) | H(41) | 109.5 |
| H(40) | C(51) | H(42) | 109.5    | H(41) | C(51) | H(42) | 109.5 |
| N(3)  | C(52) | C(53) | 102.7(4) | N(3)  | C(52) | H(27) | 110.9 |
| N(3)  | C(52) | H(28) | 111.5    | C(53) | C(52) | H(27) | 112.1 |
| C(53) | C(52) | H(28) | 110.0    | H(27) | C(52) | H(28) | 109.5 |
| C(50) | C(53) | C(52) | 104.4(4) | C(50) | C(53) | H(29) | 110.1 |
| C(50) | C(53) | H(30) | 110.4    | C(52) | C(53) | H(29) | 113.0 |
| C(52) | C(53) | H(30) | 109.3    | H(29) | C(53) | H(30) | 109.5 |
| O(9)  | C(54) | C(55) | 122.3(7) | O(9)  | C(54) | H(31) | 107.1 |
| O(9)  | C(54) | H(32) | 105.7    | C(55) | C(54) | H(31) | 108.6 |
| C(55) | C(54) | H(32) | 103.1    | H(31) | C(54) | H(32) | 109.5 |
| O(8)  | C(55) | C(54) | 124.5(7) | O(8)  | C(55) | H(33) | 106.0 |
| O(8)  | C(55) | H(34) | 103.8    | C(54) | C(55) | H(33) | 109.4 |
| C(54) | C(55) | H(34) | 102.9    | H(33) | C(55) | H(34) | 109.5 |
| O(1)  | C(56) | C(49) | 123.0(8) | O(1)  | C(56) | H(35) | 107.2 |
| O(1)  | C(56) | H(36) | 103.8    | C(49) | C(56) | H(35) | 112.3 |
| C(49) | C(56) | H(36) | 100.0    | H(35) | C(56) | H(36) | 109.5 |

Table 5. Torsion Angles( $^{\circ}$ )

| atom1 | atom2 | atom3 | atom4 | angle     | atom1 | atom2 | atom3 | atom4 | angle     |
|-------|-------|-------|-------|-----------|-------|-------|-------|-------|-----------|
| O(6)  | S(1)  | N(1)  | C(24) | 177.9(3)  | O(6)  | S(1)  | N(1)  | C(51) | 8.5(4)    |
| O(6)  | S(1)  | C(25) | C(1)  | -124.6(5) | O(6)  | S(1)  | C(25) | C(27) | 60.1(4)   |
| O(10) | S(1)  | N(1)  | C(24) | -52.4(4)  | O(10) | S(1)  | N(1)  | C(51) | 138.2(3)  |
| O(10) | S(1)  | C(25) | C(1)  | 107.7(5)  | O(10) | S(1)  | C(25) | C(27) | -67.5(4)  |
| N(1)  | S(1)  | C(25) | C(1)  | -7.9(5)   | N(1)  | S(1)  | C(25) | C(27) | 176.9(3)  |
| C(25) | S(1)  | N(1)  | C(24) | 60.7(4)   | C(25) | S(1)  | N(1)  | C(51) | -108.7(4) |
| O(5)  | S(2)  | N(13) | C(28) | -46.3(4)  | O(5)  | S(2)  | N(13) | C(31) | 142.5(3)  |
| O(5)  | S(2)  | C(38) | C(3)  | 97.9(5)   | O(5)  | S(2)  | C(38) | C(21) | -75.6(4)  |
| O(7)  | S(2)  | N(13) | C(28) | -176.0(3) | O(7)  | S(2)  | N(13) | C(31) | 12.9(4)   |
| O(7)  | S(2)  | C(38) | C(3)  | -134.5(5) | O(7)  | S(2)  | C(38) | C(21) | 52.0(5)   |
| N(13) | S(2)  | C(38) | C(3)  | -18.5(6)  | N(13) | S(2)  | C(38) | C(21) | 168.0(4)  |
| C(38) | S(2)  | N(13) | C(28) | 67.6(4)   | C(38) | S(2)  | N(13) | C(31) | -103.6(4) |
| C(42) | O(1)  | C(56) | C(49) | 8.2(12)   | C(56) | O(1)  | C(42) | C(37) | -179.8(5) |
| C(56) | O(1)  | C(42) | C(43) | -3.0(8)   | C(32) | O(8)  | C(55) | C(54) | 11.1(12)  |
| C(55) | O(8)  | C(32) | C(2)  | 179.0(6)  | C(55) | O(8)  | C(32) | C(41) | -0.4(9)   |
| C(41) | O(9)  | C(54) | C(55) | 15.8(11)  | C(54) | O(9)  | C(41) | C(32) | -5.4(9)   |
| C(54) | O(9)  | C(41) | C(36) | 173.4(6)  | C(43) | O(12) | C(49) | C(56) | 8.1(13)   |
| C(49) | O(12) | C(43) | C(30) | 179.8(5)  | C(49) | O(12) | C(43) | C(42) | -2.7(9)   |
| S(1)  | N(1)  | C(24) | C(2)  | 106.3(5)  | S(1)  | N(1)  | C(24) | C(22) | -74.7(6)  |
| C(51) | N(1)  | C(24) | C(2)  | -84.3(6)  | C(51) | N(1)  | C(24) | C(22) | 94.7(6)   |
| C(34) | N(2)  | C(39) | C(44) | 44.9(5)   | C(39) | N(2)  | C(34) | C(46) | -44.1(5)  |
| C(34) | N(2)  | C(45) | C(3)  | 176.5(4)  | C(34) | N(2)  | C(45) | C(20) | -53.2(5)  |
| C(45) | N(2)  | C(34) | C(46) | -167.4(4) | C(39) | N(2)  | C(45) | C(3)  | 59.5(5)   |
| C(39) | N(2)  | C(45) | C(20) | -170.2(3) | C(45) | N(2)  | C(39) | C(44) | 167.2(3)  |
| C(33) | N(3)  | C(35) | C(50) | -162.3(4) | C(35) | N(3)  | C(33) | C(1)  | 174.5(4)  |
| C(35) | N(3)  | C(33) | C(22) | -57.3(6)  | C(33) | N(3)  | C(52) | C(53) | 165.4(5)  |
| C(52) | N(3)  | C(33) | C(1)  | 56.5(6)   | C(52) | N(3)  | C(33) | C(22) | -175.2(5) |
| C(35) | N(3)  | C(52) | C(53) | 43.3(5)   | C(52) | N(3)  | C(35) | C(50) | -39.4(5)  |
| S(2)  | N(13) | C(28) | C(20) | -71.4(5)  | S(2)  | N(13) | C(28) | C(37) | 108.5(4)  |
| C(31) | N(13) | C(28) | C(20) | 100.0(6)  | C(31) | N(13) | C(28) | C(37) | -80.1(6)  |
| C(25) | C(1)  | C(33) | N(3)  | 74.6(6)   | C(25) | C(1)  | C(33) | C(22) | -51.8(7)  |
| C(33) | C(1)  | C(25) | S(1)  | 5.8(8)    | C(33) | C(1)  | C(25) | C(27) | -179.4(4) |
| C(25) | C(1)  | C(47) | C(48) | 1.5(8)    | C(47) | C(1)  | C(25) | S(1)  | -174.6(4) |
| C(47) | C(1)  | C(25) | C(27) | 0.2(6)    | C(33) | C(1)  | C(47) | C(48) | -178.9(5) |
| C(47) | C(1)  | C(33) | N(3)  | -104.9(5) | C(47) | C(1)  | C(33) | C(22) | 128.6(5)  |
| C(24) | C(2)  | C(32) | O(8)  | 179.1(5)  | C(24) | C(2)  | C(32) | C(41) | -1.5(9)   |
| C(32) | C(2)  | C(24) | N(1)  | -178.4(5) | C(32) | C(2)  | C(24) | C(22) | 2.6(9)    |



Table 5. Torsion angles ( $^{\circ}$ ) (continued)

| atom1 | atom2 | atom3 | atom4 | angle     | atom1 | atom2 | atom3 | atom4 | angle     |
|-------|-------|-------|-------|-----------|-------|-------|-------|-------|-----------|
| C(26) | C(3)  | C(38) | S(2)  | -173.5(4) | C(26) | C(3)  | C(38) | C(21) | -0.6(8)   |
| C(38) | C(3)  | C(26) | C(17) | -0.4(9)   | C(26) | C(3)  | C(45) | N(2)  | -99.0(5)  |
| C(26) | C(3)  | C(45) | C(20) | 134.4(5)  | C(45) | C(3)  | C(26) | C(17) | 175.0(5)  |
| C(38) | C(3)  | C(45) | N(2)  | 75.9(7)   | C(38) | C(3)  | C(45) | C(20) | -50.7(7)  |
| C(45) | C(3)  | C(38) | S(2)  | 11.4(9)   | C(45) | C(3)  | C(38) | C(21) | -175.7(5) |
| C(26) | C(17) | C(29) | Cl(1) | -179.8(4) | C(26) | C(17) | C(29) | C(21) | 2.4(10)   |
| C(29) | C(17) | C(26) | C(3)  | -0.5(9)   | C(28) | C(20) | C(30) | C(43) | 0.4(7)    |
| C(30) | C(20) | C(28) | N(13) | 178.1(4)  | C(30) | C(20) | C(28) | C(37) | -1.8(7)   |
| C(28) | C(20) | C(45) | N(2)  | -58.8(5)  | C(28) | C(20) | C(45) | C(3)  | 67.3(6)   |
| C(45) | C(20) | C(28) | N(13) | -5.1(7)   | C(45) | C(20) | C(28) | C(37) | 175.0(4)  |
| C(30) | C(20) | C(45) | N(2)  | 117.8(5)  | C(30) | C(20) | C(45) | C(3)  | -116.1(5) |
| C(45) | C(20) | C(30) | C(43) | -176.4(5) | C(29) | C(21) | C(38) | S(2)  | 176.5(5)  |
| C(29) | C(21) | C(38) | C(3)  | 2.5(9)    | C(38) | C(21) | C(29) | Cl(1) | 178.8(4)  |
| C(38) | C(21) | C(29) | C(17) | -3.4(9)   | C(24) | C(22) | C(33) | N(3)  | -59.4(7)  |
| C(24) | C(22) | C(33) | C(1)  | 67.1(7)   | C(33) | C(22) | C(24) | N(1)  | -0.7(8)   |
| C(33) | C(22) | C(24) | C(2)  | 178.3(5)  | C(24) | C(22) | C(36) | C(41) | 0.6(8)    |
| C(36) | C(22) | C(24) | N(1)  | 178.9(4)  | C(36) | C(22) | C(24) | C(2)  | -2.1(8)   |
| C(33) | C(22) | C(36) | C(41) | -179.8(5) | C(36) | C(22) | C(33) | N(3)  | 121.0(5)  |
| C(36) | C(22) | C(33) | C(1)  | -112.5(6) | S(1)  | C(25) | C(27) | C(40) | 174.4(4)  |
| C(1)  | C(25) | C(27) | C(40) | -1.3(7)   | C(25) | C(27) | C(40) | Cl(3) | -178.5(4) |
| C(25) | C(27) | C(40) | C(48) | 0.7(8)    | N(13) | C(28) | C(37) | C(42) | 179.8(5)  |
| C(20) | C(28) | C(37) | C(42) | -0.3(7)   | C(20) | C(30) | C(43) | O(12) | -179.3(5) |
| C(20) | C(30) | C(43) | C(42) | 3.0(9)    | O(8)  | C(32) | C(41) | O(9)  | -1.8(10)  |
| O(8)  | C(32) | C(41) | C(36) | 179.5(5)  | C(2)  | C(32) | C(41) | O(9)  | 178.8(5)  |
| C(2)  | C(32) | C(41) | C(36) | 0.1(8)    | N(2)  | C(34) | C(46) | C(44) | 26.2(5)   |
| N(3)  | C(35) | C(50) | C(53) | 19.9(6)   | C(22) | C(36) | C(41) | O(9)  | -178.5(5) |
| C(22) | C(36) | C(41) | C(32) | 0.4(8)    | C(28) | C(37) | C(42) | O(1)  | -179.4(5) |
| C(28) | C(37) | C(42) | C(43) | 3.8(9)    | N(2)  | C(39) | C(44) | C(46) | -27.3(5)  |
| Cl(3) | C(40) | C(48) | C(47) | -179.9(3) | C(27) | C(40) | C(48) | C(47) | 0.8(8)    |
| O(1)  | C(42) | C(43) | O(12) | 0.8(10)   | O(1)  | C(42) | C(43) | C(30) | 178.2(5)  |
| C(37) | C(42) | C(43) | O(12) | 177.5(5)  | C(37) | C(42) | C(43) | C(30) | -5.1(9)   |
| C(39) | C(44) | C(46) | C(34) | 0.7(5)    | C(1)  | C(47) | C(48) | C(40) | -2.0(8)   |
| O(12) | C(49) | C(56) | O(1)  | -11.6(17) | C(35) | C(50) | C(53) | C(52) | 5.9(6)    |
| N(3)  | C(52) | C(53) | C(50) | -29.5(6)  | O(9)  | C(54) | C(55) | O(8)  | -20.0(15) |

The sign is positive if when looking from atom 2 to atom 3 a clock-wise motion of atom 1 would superimpose it on atom 4.

Table 6. Distances beyond the asymmetric unit out to 3.60 Å

| atom  | atom                 | distance  | atom  | atom                | distance  |
|-------|----------------------|-----------|-------|---------------------|-----------|
| Cl(1) | O(6) <sup>1)</sup>   | 3.415(3)  | Cl(1) | H(26) <sup>2)</sup> | 3.088     |
| Cl(1) | H(27) <sup>1)</sup>  | 3.378     | Cl(1) | H(41) <sup>2)</sup> | 3.130     |
| Cl(3) | O(7) <sup>3)</sup>   | 3.443(3)  | Cl(3) | H(3) <sup>3)</sup>  | 3.145     |
| Cl(3) | H(7) <sup>4)</sup>   | 3.311     | S(1)  | H(31) <sup>3)</sup> | 3.314     |
| S(2)  | H(35) <sup>1)</sup>  | 3.576     | S(2)  | H(37) <sup>5)</sup> | 2.884     |
| O(1)  | O(1) <sup>4)</sup>   | 3.313(5)  | O(1)  | H(9)                | 2.930     |
| O(1)  | H(9) <sup>4)</sup>   | 2.887     | O(5)  | C(31) <sup>5)</sup> | 3.487(5)  |
| O(5)  | C(44) <sup>6)</sup>  | 3.541(6)  | O(5)  | C(47)               | 3.472(7)  |
| O(5)  | H(6)                 | 3.159     | O(5)  | H(8)                | 2.691     |
| O(5)  | H(10)                | 2.909     | O(5)  | H(20) <sup>6)</sup> | 2.706     |
| O(5)  | H(21) <sup>6)</sup>  | 3.247     | O(5)  | H(37) <sup>5)</sup> | 2.629     |
| O(5)  | H(39) <sup>5)</sup>  | 3.580     | O(6)  | Cl(1) <sup>3)</sup> | 3.415(3)  |
| O(6)  | C(2) <sup>7)</sup>   | 3.379(6)  | O(6)  | H(1) <sup>7)</sup>  | 3.156     |
| O(6)  | H(31) <sup>3)</sup>  | 2.914     | O(6)  | H(34) <sup>3)</sup> | 3.406     |
| O(6)  | H(40) <sup>7)</sup>  | 3.350     | O(6)  | H(41) <sup>7)</sup> | 3.093     |
| O(7)  | Cl(3) <sup>1)</sup>  | 3.443(3)  | O(7)  | N(13) <sup>5)</sup> | 3.564(5)  |
| O(7)  | C(31) <sup>5)</sup>  | 3.364(6)  | O(7)  | C(49) <sup>1)</sup> | 3.567(12) |
| O(7)  | C(56) <sup>1)</sup>  | 3.242(11) | O(7)  | H(7) <sup>5)</sup>  | 2.790     |
| O(7)  | H(24) <sup>1)</sup>  | 3.064     | O(7)  | H(35) <sup>1)</sup> | 2.379     |
| O(7)  | H(37) <sup>5)</sup>  | 2.521     | O(8)  | C(17) <sup>6)</sup> | 3.277(7)  |
| O(8)  | H(2) <sup>6)</sup>   | 2.676     | O(8)  | H(4) <sup>6)</sup>  | 3.494     |
| O(8)  | H(25) <sup>8)</sup>  | 3.453     | O(8)  | H(26) <sup>8)</sup> | 3.452     |
| O(8)  | H(40) <sup>2)</sup>  | 3.153     | O(9)  | H(5) <sup>1)</sup>  | 2.826     |
| O(9)  | H(17) <sup>6)</sup>  | 3.433     | O(9)  | H(40) <sup>2)</sup> | 3.192     |
| O(10) | H(4) <sup>6)</sup>   | 2.855     | O(10) | H(11) <sup>6)</sup> | 2.695     |
| O(10) | H(12) <sup>6)</sup>  | 3.205     | O(10) | H(25) <sup>6)</sup> | 3.591     |
| O(10) | H(29) <sup>6)</sup>  | 2.817     | O(10) | H(31) <sup>3)</sup> | 2.996     |
| O(12) | C(54) <sup>9)</sup>  | 3.554(9)  | O(12) | H(17) <sup>3)</sup> | 3.568     |
| O(12) | H(32) <sup>9)</sup>  | 2.680     | N(2)  | H(23) <sup>1)</sup> | 3.470     |
| N(13) | O(7) <sup>5)</sup>   | 3.564(5)  | N(13) | H(37) <sup>5)</sup> | 3.535     |
| C(1)  | H(13) <sup>6)</sup>  | 3.486     | C(1)  | H(18) <sup>6)</sup> | 3.559     |
| C(2)  | O(6) <sup>2)</sup>   | 3.379(6)  | C(2)  | H(4) <sup>6)</sup>  | 3.001     |
| C(2)  | H(34) <sup>7)</sup>  | 3.391     | C(2)  | H(40) <sup>2)</sup> | 3.424     |
| C(3)  | H(15)                | 3.419     | C(3)  | H(28)               | 3.514     |
| C(17) | O(8) <sup>10)</sup>  | 3.277(7)  | C(17) | H(15)               | 2.844     |
| C(17) | H(25)                | 3.350     | C(17) | H(26) <sup>2)</sup> | 3.480     |
| C(17) | H(33) <sup>10)</sup> | 3.360     | C(20) | H(28)               | 3.247     |

Table 6. Distances beyond the asymmetric unit out to 3.60 Å (continued)

| atom  | atom                | distance | atom  | atom                | distance  |
|-------|---------------------|----------|-------|---------------------|-----------|
| C(21) | H(6)                | 3.199    | C(21) | H(15)               | 3.448     |
| C(21) | H(24) <sup>11</sup> | 3.061    | C(22) | H(18) <sup>6</sup>  | 3.009     |
| C(24) | H(4) <sup>6</sup>   | 3.530    | C(24) | H(18) <sup>6</sup>  | 3.384     |
| C(25) | H(13) <sup>6</sup>  | 3.371    | C(26) | H(15)               | 3.004     |
| C(26) | H(25)               | 3.209    | C(27) | H(13) <sup>6</sup>  | 3.137     |
| C(27) | H(31) <sup>31</sup> | 3.334    | C(28) | H(8)                | 3.328     |
| C(29) | H(15)               | 3.102    | C(29) | H(24) <sup>11</sup> | 3.577     |
| C(30) | H(28)               | 2.964    | C(31) | O(5) <sup>5</sup>   | 3.487(5)  |
| C(31) | O(7) <sup>5</sup>   | 3.364(6) | C(31) | C(44) <sup>11</sup> | 3.558(8)  |
| C(31) | C(46) <sup>11</sup> | 3.506(8) | C(31) | H(19) <sup>11</sup> | 3.221     |
| C(31) | H(20) <sup>11</sup> | 3.469    | C(31) | H(21) <sup>11</sup> | 3.399     |
| C(31) | H(22) <sup>11</sup> | 3.124    | C(32) | H(2) <sup>6</sup>   | 3.361     |
| C(32) | H(4) <sup>6</sup>   | 3.189    | C(32) | H(18) <sup>6</sup>  | 3.502     |
| C(32) | H(40) <sup>2</sup>  | 2.827    | C(36) | C(39) <sup>6</sup>  | 3.461(7)  |
| C(36) | H(17) <sup>6</sup>  | 3.572    | C(36) | H(18) <sup>6</sup>  | 2.816     |
| C(36) | H(20) <sup>6</sup>  | 3.103    | C(36) | H(40) <sup>2</sup>  | 3.433     |
| C(37) | H(8)                | 3.186    | C(37) | H(9)                | 3.537     |
| C(37) | H(35) <sup>41</sup> | 3.579    | C(38) | H(10)               | 3.591     |
| C(38) | H(24) <sup>11</sup> | 3.244    | C(39) | C(36) <sup>10</sup> | 3.461(7)  |
| C(39) | C(41) <sup>10</sup> | 3.583(8) | C(39) | H(6) <sup>10</sup>  | 3.585     |
| C(39) | H(23) <sup>11</sup> | 3.088    | C(40) | H(3) <sup>3</sup>   | 3.404     |
| C(40) | H(13) <sup>6</sup>  | 3.001    | C(41) | C(39) <sup>6</sup>  | 3.583(8)  |
| C(41) | H(17) <sup>6</sup>  | 3.334    | C(41) | H(18) <sup>6</sup>  | 3.084     |
| C(41) | H(40) <sup>2</sup>  | 2.834    | C(42) | H(8)                | 3.319     |
| C(42) | H(9)                | 3.199    | C(43) | H(8)                | 3.508     |
| C(44) | O(5) <sup>10</sup>  | 3.541(6) | C(44) | C(31) <sup>11</sup> | 3.558(8)  |
| C(44) | H(6) <sup>10</sup>  | 3.435    | C(44) | H(23) <sup>11</sup> | 3.291     |
| C(44) | H(37) <sup>11</sup> | 3.354    | C(44) | H(38) <sup>11</sup> | 3.276     |
| C(44) | H(39) <sup>11</sup> | 3.462    | C(46) | C(31) <sup>11</sup> | 3.506(8)  |
| C(46) | H(36) <sup>12</sup> | 2.950    | C(46) | H(37) <sup>11</sup> | 3.531     |
| C(46) | H(38) <sup>11</sup> | 3.431    | C(46) | H(39) <sup>11</sup> | 3.011     |
| C(47) | O(5)                | 3.472(7) | C(47) | H(13) <sup>6</sup>  | 3.325     |
| C(47) | H(21) <sup>6</sup>  | 3.144    | C(48) | H(13) <sup>6</sup>  | 3.089     |
| C(48) | H(21) <sup>6</sup>  | 3.166    | C(49) | O(7) <sup>3</sup>   | 3.567(12) |
| C(49) | H(17) <sup>31</sup> | 3.209    | C(49) | H(19) <sup>31</sup> | 3.548     |
| C(49) | H(32) <sup>9</sup>  | 3.596    | C(49) | H(39) <sup>31</sup> | 3.519     |
| C(50) | H(2) <sup>7</sup>   | 3.472    | C(52) | H(12)               | 3.560     |

Table 6. Distances beyond the asymmetric unit out to 3.60 Å (continued)

| atom  | atom                 | distance  | atom  | atom                 | distance |
|-------|----------------------|-----------|-------|----------------------|----------|
| C(53) | H(33) <sup>9)</sup>  | 3.227     | C(53) | H(34) <sup>9)</sup>  | 3.572    |
| C(54) | O(12) <sup>13)</sup> | 3.554(9)  | C(54) | H(5) <sup>1)</sup>   | 3.043    |
| C(54) | H(12) <sup>13)</sup> | 3.471     | C(54) | H(29) <sup>13)</sup> | 3.537    |
| C(54) | H(40) <sup>2)</sup>  | 3.525     | C(55) | H(1) <sup>2)</sup>   | 3.403    |
| C(55) | H(2) <sup>6)</sup>   | 3.335     | C(55) | H(29) <sup>13)</sup> | 3.391    |
| C(55) | H(30) <sup>13)</sup> | 3.397     | C(55) | H(40) <sup>2)</sup>  | 3.354    |
| C(56) | O(7) <sup>3)</sup>   | 3.242(11) | C(56) | H(7) <sup>4)</sup>   | 3.515    |
| C(56) | H(9)                 | 3.461     | C(56) | H(21) <sup>12)</sup> | 3.348    |
| C(56) | H(22) <sup>12)</sup> | 3.495     | C(56) | H(39) <sup>3)</sup>  | 3.209    |
| H(1)  | O(6) <sup>2)</sup>   | 3.156     | H(1)  | C(55) <sup>7)</sup>  | 3.403    |
| H(1)  | H(2) <sup>6)</sup>   | 3.448     | H(1)  | H(4) <sup>6)</sup>   | 3.049    |
| H(1)  | H(34) <sup>7)</sup>  | 2.471     | H(2)  | O(8) <sup>10)</sup>  | 2.676    |
| H(2)  | C(32) <sup>10)</sup> | 3.361     | H(2)  | C(50) <sup>2)</sup>  | 3.472    |
| H(2)  | C(55) <sup>10)</sup> | 3.335     | H(2)  | H(1) <sup>10)</sup>  | 3.448    |
| H(2)  | H(15)                | 3.138     | H(2)  | H(25)                | 3.197    |
| H(2)  | H(26) <sup>2)</sup>  | 2.672     | H(2)  | H(30) <sup>2)</sup>  | 3.209    |
| H(2)  | H(33) <sup>10)</sup> | 2.962     | H(3)  | Cl(3) <sup>1)</sup>  | 3.145    |
| H(3)  | C(40) <sup>1)</sup>  | 3.404     | H(3)  | H(6)                 | 2.932    |
| H(3)  | H(24) <sup>1)</sup>  | 3.109     | H(4)  | O(8) <sup>10)</sup>  | 3.494    |
| H(4)  | O(10) <sup>10)</sup> | 2.855     | H(4)  | C(2) <sup>10)</sup>  | 3.001    |
| H(4)  | C(24) <sup>10)</sup> | 3.530     | H(4)  | C(32) <sup>10)</sup> | 3.189    |
| H(4)  | H(1) <sup>10)</sup>  | 3.049     | H(4)  | H(15)                | 3.385    |
| H(4)  | H(25)                | 2.936     | H(5)  | O(9) <sup>3)</sup>   | 2.826    |
| H(5)  | C(54) <sup>3)</sup>  | 3.043     | H(5)  | H(12) <sup>6)</sup>  | 3.251    |
| H(5)  | H(31) <sup>3)</sup>  | 2.433     | H(5)  | H(32) <sup>3)</sup>  | 3.409    |
| H(6)  | O(5)                 | 3.159     | H(6)  | C(21)                | 3.199    |
| H(6)  | C(39) <sup>6)</sup>  | 3.585     | H(6)  | C(44) <sup>6)</sup>  | 3.435    |
| H(6)  | H(3)                 | 2.932     | H(6)  | H(18) <sup>6)</sup>  | 3.101    |
| H(6)  | H(20) <sup>6)</sup>  | 2.656     | H(7)  | Cl(3) <sup>4)</sup>  | 3.311    |
| H(7)  | O(7) <sup>5)</sup>   | 2.790     | H(7)  | C(56) <sup>4)</sup>  | 3.515    |
| H(7)  | H(8)                 | 3.537     | H(7)  | H(9)                 | 3.553    |
| H(7)  | H(9) <sup>4)</sup>   | 3.579     | H(7)  | H(35) <sup>4)</sup>  | 2.713    |
| H(8)  | O(5)                 | 2.691     | H(8)  | C(28)                | 3.328    |
| H(8)  | C(37)                | 3.186     | H(8)  | C(42)                | 3.319    |
| H(8)  | C(43)                | 3.508     | H(8)  | H(7)                 | 3.537    |
| H(8)  | H(21) <sup>6)</sup>  | 3.147     | H(9)  | O(1)                 | 2.930    |
| H(9)  | O(1) <sup>4)</sup>   | 2.887     | H(9)  | C(37)                | 3.537    |

Table 6. Distances beyond the asymmetric unit out to 3.60 Å (continued)

| atom  | atom                 | distance | atom  | atom                 | distance |
|-------|----------------------|----------|-------|----------------------|----------|
| H(9)  | C(42)                | 3.199    | H(9)  | C(56)                | 3.461    |
| H(9)  | H(7)                 | 3.553    | H(9)  | H(7) <sup>4)</sup>   | 3.579    |
| H(9)  | H(13) <sup>6)</sup>  | 3.501    | H(9)  | H(21) <sup>6)</sup>  | 3.134    |
| H(9)  | H(24)                | 3.555    | H(9)  | H(35)                | 3.235    |
| H(9)  | H(36) <sup>4)</sup>  | 3.419    | H(10) | O(5)                 | 2.909    |
| H(10) | C(38)                | 3.591    | H(10) | H(20) <sup>6)</sup>  | 3.542    |
| H(11) | O(10) <sup>10)</sup> | 2.695    | H(11) | H(28)                | 3.512    |
| H(12) | O(10) <sup>10)</sup> | 3.205    | H(12) | C(52)                | 3.560    |
| H(12) | C(54) <sup>9)</sup>  | 3.471    | H(12) | H(5) <sup>10)</sup>  | 3.251    |
| H(12) | H(28)                | 2.870    | H(12) | H(29)                | 3.291    |
| H(12) | H(31) <sup>9)</sup>  | 2.988    | H(12) | H(32) <sup>9)</sup>  | 3.065    |
| H(13) | C(1) <sup>10)</sup>  | 3.486    | H(13) | C(25) <sup>10)</sup> | 3.371    |
| H(13) | C(27) <sup>10)</sup> | 3.137    | H(13) | C(40) <sup>10)</sup> | 3.001    |
| H(13) | C(47) <sup>10)</sup> | 3.325    | H(13) | C(48) <sup>10)</sup> | 3.089    |
| H(13) | H(9) <sup>10)</sup>  | 3.501    | H(14) | H(36) <sup>12)</sup> | 3.421    |
| H(15) | C(3)                 | 3.419    | H(15) | C(17)                | 2.844    |
| H(15) | C(21)                | 3.448    | H(15) | C(26)                | 3.004    |
| H(15) | C(29)                | 3.102    | H(15) | H(2)                 | 3.138    |
| H(15) | H(4)                 | 3.385    | H(16) | H(42) <sup>2)</sup>  | 2.785    |
| H(17) | O(9) <sup>10)</sup>  | 3.433    | H(17) | O(12) <sup>1)</sup>  | 3.568    |
| H(17) | C(36) <sup>10)</sup> | 3.572    | H(17) | C(41) <sup>10)</sup> | 3.334    |
| H(17) | C(49) <sup>1)</sup>  | 3.209    | H(17) | H(23) <sup>1)</sup>  | 2.425    |
| H(17) | H(24) <sup>1)</sup>  | 3.328    | H(17) | H(32) <sup>10)</sup> | 3.274    |
| H(18) | C(1) <sup>10)</sup>  | 3.559    | H(18) | C(22) <sup>10)</sup> | 3.009    |
| H(18) | C(24) <sup>10)</sup> | 3.384    | H(18) | C(32) <sup>10)</sup> | 3.502    |
| H(18) | C(36) <sup>10)</sup> | 2.816    | H(18) | C(41) <sup>10)</sup> | 3.084    |
| H(18) | H(6) <sup>10)</sup>  | 3.101    | H(19) | C(31) <sup>11)</sup> | 3.221    |
| H(19) | C(49) <sup>1)</sup>  | 3.548    | H(19) | H(22) <sup>11)</sup> | 3.012    |
| H(19) | H(23) <sup>1)</sup>  | 2.652    | H(19) | H(37) <sup>11)</sup> | 3.152    |
| H(19) | H(38) <sup>11)</sup> | 2.714    | H(19) | H(39) <sup>11)</sup> | 3.289    |
| H(20) | O(5) <sup>10)</sup>  | 2.706    | H(20) | C(31) <sup>11)</sup> | 3.469    |
| H(20) | C(36) <sup>10)</sup> | 3.103    | H(20) | H(6) <sup>10)</sup>  | 2.656    |
| H(20) | H(10) <sup>10)</sup> | 3.542    | H(20) | H(37) <sup>11)</sup> | 3.019    |
| H(20) | H(38) <sup>11)</sup> | 3.355    | H(20) | H(39) <sup>11)</sup> | 3.484    |
| H(21) | O(5) <sup>10)</sup>  | 3.247    | H(21) | C(31) <sup>11)</sup> | 3.399    |
| H(21) | C(47) <sup>10)</sup> | 3.144    | H(21) | C(48) <sup>10)</sup> | 3.166    |
| H(21) | C(56) <sup>12)</sup> | 3.348    | H(21) | H(8) <sup>10)</sup>  | 3.147    |

Table 6. Distances beyond the asymmetric unit out to 3.60 Å (continued)

| atom  | atom                  | distance | atom  | atom                  | distance |
|-------|-----------------------|----------|-------|-----------------------|----------|
| H(21) | H(9) <sup>(10)</sup>  | 3.134    | H(21) | H(35) <sup>(12)</sup> | 3.394    |
| H(21) | H(36) <sup>(12)</sup> | 2.555    | H(21) | H(37) <sup>(11)</sup> | 3.298    |
| H(21) | H(38) <sup>(11)</sup> | 3.580    | H(21) | H(39) <sup>(11)</sup> | 2.821    |
| H(22) | C(31) <sup>(11)</sup> | 3.124    | H(22) | C(56) <sup>(12)</sup> | 3.495    |
| H(22) | H(19) <sup>(11)</sup> | 3.012    | H(22) | H(22) <sup>(11)</sup> | 2.867    |
| H(22) | H(23) <sup>(12)</sup> | 3.360    | H(22) | H(36) <sup>(12)</sup> | 2.595    |
| H(22) | H(37) <sup>(11)</sup> | 3.401    | H(22) | H(38) <sup>(11)</sup> | 2.970    |
| H(22) | H(39) <sup>(11)</sup> | 2.555    | H(23) | N(2) <sup>(3)</sup>   | 3.470    |
| H(23) | C(39) <sup>(3)</sup>  | 3.088    | H(23) | C(44) <sup>(3)</sup>  | 3.291    |
| H(23) | H(17) <sup>(3)</sup>  | 2.425    | H(23) | H(19) <sup>(3)</sup>  | 2.652    |
| H(23) | H(22) <sup>(12)</sup> | 3.360    | H(23) | H(32) <sup>(9)</sup>  | 3.569    |
| H(23) | H(39) <sup>(3)</sup>  | 3.051    | H(24) | O(7) <sup>(3)</sup>   | 3.064    |
| H(24) | C(21) <sup>(3)</sup>  | 3.061    | H(24) | C(29) <sup>(3)</sup>  | 3.577    |
| H(24) | C(38) <sup>(3)</sup>  | 3.244    | H(24) | H(3) <sup>(3)</sup>   | 3.109    |
| H(24) | H(9)                  | 3.555    | H(24) | H(17) <sup>(3)</sup>  | 3.328    |
| H(25) | O(8) <sup>(14)</sup>  | 3.453    | H(25) | O(10) <sup>(10)</sup> | 3.591    |
| H(25) | C(17)                 | 3.350    | H(25) | C(26)                 | 3.209    |
| H(25) | H(2)                  | 3.197    | H(25) | H(4)                  | 2.936    |
| H(25) | H(30) <sup>(2)</sup>  | 3.474    | H(25) | H(33) <sup>(14)</sup> | 3.430    |
| H(25) | H(34) <sup>(14)</sup> | 3.532    | H(26) | Cl(1) <sup>(7)</sup>  | 3.088    |
| H(26) | O(8) <sup>(14)</sup>  | 3.452    | H(26) | C(17) <sup>(7)</sup>  | 3.480    |
| H(26) | H(2) <sup>(7)</sup>   | 2.672    | H(26) | H(33) <sup>(14)</sup> | 3.288    |
| H(27) | Cl(1) <sup>(3)</sup>  | 3.378    | H(27) | H(33) <sup>(9)</sup>  | 3.273    |
| H(28) | C(3)                  | 3.514    | H(28) | C(20)                 | 3.247    |
| H(28) | C(30)                 | 2.964    | H(28) | H(11)                 | 3.512    |
| H(28) | H(12)                 | 2.870    | H(29) | O(10) <sup>(10)</sup> | 2.817    |
| H(29) | C(54) <sup>(9)</sup>  | 3.537    | H(29) | C(55) <sup>(9)</sup>  | 3.391    |
| H(29) | H(12)                 | 3.291    | H(29) | H(31) <sup>(9)</sup>  | 2.988    |
| H(29) | H(33) <sup>(9)</sup>  | 3.015    | H(29) | H(34) <sup>(9)</sup>  | 3.085    |
| H(30) | C(55) <sup>(9)</sup>  | 3.397    | H(30) | H(2) <sup>(7)</sup>   | 3.209    |
| H(30) | H(25) <sup>(7)</sup>  | 3.474    | H(30) | H(33) <sup>(9)</sup>  | 2.764    |
| H(30) | H(34) <sup>(9)</sup>  | 3.176    | H(31) | S(1) <sup>(1)</sup>   | 3.314    |
| H(31) | O(6) <sup>(1)</sup>   | 2.914    | H(31) | O(10) <sup>(1)</sup>  | 2.996    |
| H(31) | C(27) <sup>(1)</sup>  | 3.334    | H(31) | H(5) <sup>(1)</sup>   | 2.433    |
| H(31) | H(12) <sup>(13)</sup> | 2.988    | H(31) | H(29) <sup>(13)</sup> | 2.988    |
| H(32) | O(12) <sup>(13)</sup> | 2.680    | H(32) | C(49) <sup>(13)</sup> | 3.596    |
| H(32) | H(5) <sup>(1)</sup>   | 3.409    | H(32) | H(12) <sup>(13)</sup> | 3.065    |

Table 6. Distances beyond the asymmetric unit out to 3.60 Å (continued)

| atom  | atom                 | distance | atom  | atom                 | distance |
|-------|----------------------|----------|-------|----------------------|----------|
| H(32) | H(17) <sup>6j</sup>  | 3.274    | H(32) | H(23) <sup>13j</sup> | 3.569    |
| H(33) | C(17) <sup>6j</sup>  | 3.360    | H(33) | C(53) <sup>13j</sup> | 3.227    |
| H(33) | H(2) <sup>6j</sup>   | 2.962    | H(33) | H(25) <sup>8j</sup>  | 3.430    |
| H(33) | H(26) <sup>8j</sup>  | 3.288    | H(33) | H(27) <sup>13j</sup> | 3.273    |
| H(33) | H(29) <sup>13j</sup> | 3.015    | H(33) | H(30) <sup>13j</sup> | 2.764    |
| H(34) | O(6) <sup>1j</sup>   | 3.406    | H(34) | C(2) <sup>2j</sup>   | 3.391    |
| H(34) | C(53) <sup>13j</sup> | 3.572    | H(34) | H(1) <sup>2j</sup>   | 2.471    |
| H(34) | H(25) <sup>8j</sup>  | 3.532    | H(34) | H(29) <sup>13j</sup> | 3.085    |
| H(34) | H(30) <sup>13j</sup> | 3.176    | H(34) | H(40) <sup>2j</sup>  | 2.941    |
| H(35) | S(2) <sup>3j</sup>   | 3.576    | H(35) | O(7) <sup>3j</sup>   | 2.379    |
| H(35) | C(37) <sup>4j</sup>  | 3.579    | H(35) | H(7) <sup>4j</sup>   | 2.713    |
| H(35) | H(9)                 | 3.235    | H(35) | H(21) <sup>12j</sup> | 3.394    |
| H(35) | H(39) <sup>3j</sup>  | 2.812    | H(36) | C(46) <sup>12j</sup> | 2.950    |
| H(36) | H(9) <sup>4j</sup>   | 3.419    | H(36) | H(14) <sup>12j</sup> | 3.421    |
| H(36) | H(21) <sup>12j</sup> | 2.555    | H(36) | H(22) <sup>12j</sup> | 2.595    |
| H(36) | H(39) <sup>3j</sup>  | 2.862    | H(37) | S(2) <sup>5j</sup>   | 2.884    |
| H(37) | O(5) <sup>5j</sup>   | 2.629    | H(37) | O(7) <sup>5j</sup>   | 2.521    |
| H(37) | N(13) <sup>5j</sup>  | 3.535    | H(37) | C(44) <sup>11j</sup> | 3.354    |
| H(37) | C(46) <sup>11j</sup> | 3.531    | H(37) | H(19) <sup>11j</sup> | 3.152    |
| H(37) | H(20) <sup>11j</sup> | 3.019    | H(37) | H(21) <sup>11j</sup> | 3.298    |
| H(37) | H(22) <sup>11j</sup> | 3.401    | H(38) | C(44) <sup>11j</sup> | 3.276    |
| H(38) | C(46) <sup>11j</sup> | 3.431    | H(38) | H(19) <sup>11j</sup> | 2.714    |
| H(38) | H(20) <sup>11j</sup> | 3.355    | H(38) | H(21) <sup>11j</sup> | 3.580    |
| H(38) | H(22) <sup>11j</sup> | 2.970    | H(39) | O(5) <sup>5j</sup>   | 3.580    |
| H(39) | C(44) <sup>11j</sup> | 3.462    | H(39) | C(46) <sup>11j</sup> | 3.011    |
| H(39) | C(49) <sup>1j</sup>  | 3.519    | H(39) | C(56) <sup>1j</sup>  | 3.209    |
| H(39) | H(19) <sup>11j</sup> | 3.289    | H(39) | H(20) <sup>11j</sup> | 3.484    |
| H(39) | H(21) <sup>11j</sup> | 2.821    | H(39) | H(22) <sup>11j</sup> | 2.555    |
| H(39) | H(23) <sup>1j</sup>  | 3.051    | H(39) | H(35) <sup>1j</sup>  | 2.812    |
| H(39) | H(36) <sup>1j</sup>  | 2.862    | H(40) | O(6) <sup>2j</sup>   | 3.350    |
| H(40) | O(8) <sup>7j</sup>   | 3.153    | H(40) | O(9) <sup>7j</sup>   | 3.192    |
| H(40) | C(2) <sup>7j</sup>   | 3.424    | H(40) | C(32) <sup>7j</sup>  | 2.827    |
| H(40) | C(36) <sup>7j</sup>  | 3.433    | H(40) | C(41) <sup>7j</sup>  | 2.834    |
| H(40) | C(54) <sup>7j</sup>  | 3.525    | H(40) | C(55) <sup>7j</sup>  | 3.354    |
| H(40) | H(34) <sup>7j</sup>  | 2.941    | H(41) | Cl(1) <sup>7j</sup>  | 3.130    |
| H(41) | O(6) <sup>2j</sup>   | 3.093    | H(42) | H(16) <sup>7j</sup>  | 2.785    |

Symmetry Operators:

- |                    |                        |
|--------------------|------------------------|
| (1) X,Y,Z-1        | (2) X,-Y+1/2,Z+1/2-1   |
| (3) X,Y,Z+1        | (4) -X+1,-Y,-Z+2       |
| (5) -X+1,-Y,-Z+1   | (6) X-1,Y,Z            |
| (7) X,-Y+1/2,Z+1/2 | (8) X-1,-Y+1/2,Z+1/2-1 |
| (9) X+1,Y,Z+1      | (10) X+1,Y,Z           |
| (11) -X+2,-Y,-Z+1  | (12) -X+2,-Y,-Z+2      |
| (13) X-1,Y,Z-1     | (14) X+1,-Y+1/2,Z+1/2  |
