# Supplementary material for: Synthesis of new tetra- and pentacyclic, methylenedioxy- and ethylenedioxy-substituted derivatives of the dibenzo[ c , f ][1,2]thiazepine ring system
Source: publisher site journal article supplement (doi:10.3762/bjoc.21.205), 2025-12-09
Supplement: Additional file 2 [file compound 23a structure report.pdf › compound 23a structure report.pdf]

**143758**

**2068-BGE**

Submitted by: Berecz Gabor  
Operator: Dancso Andras

X-ray Structure Report

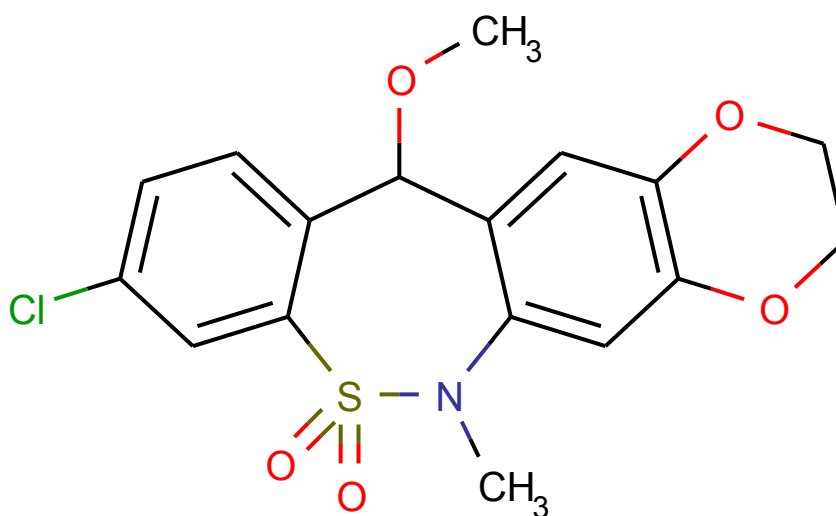

October 25, 2024

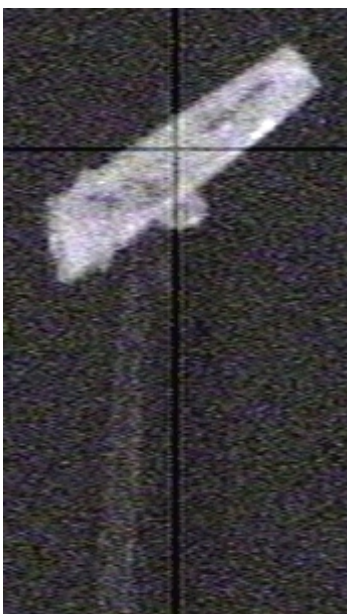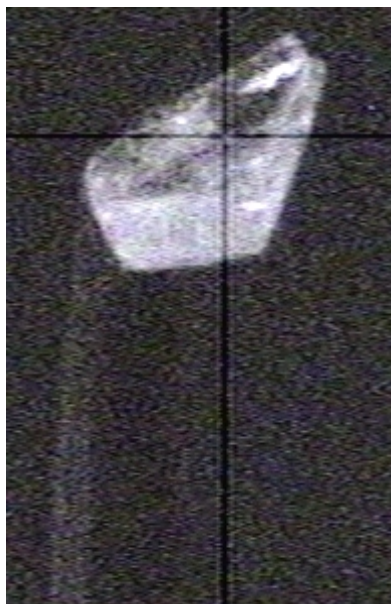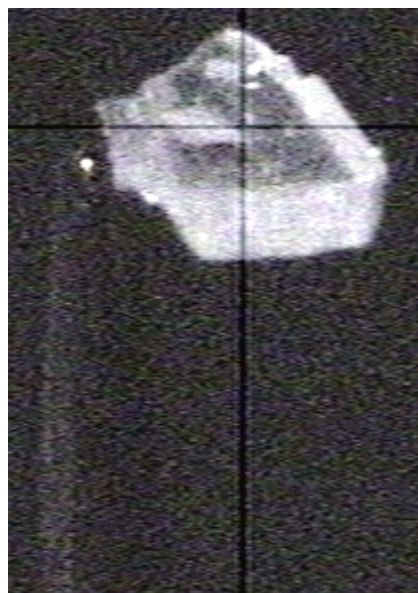

Fig. 1. The crystal

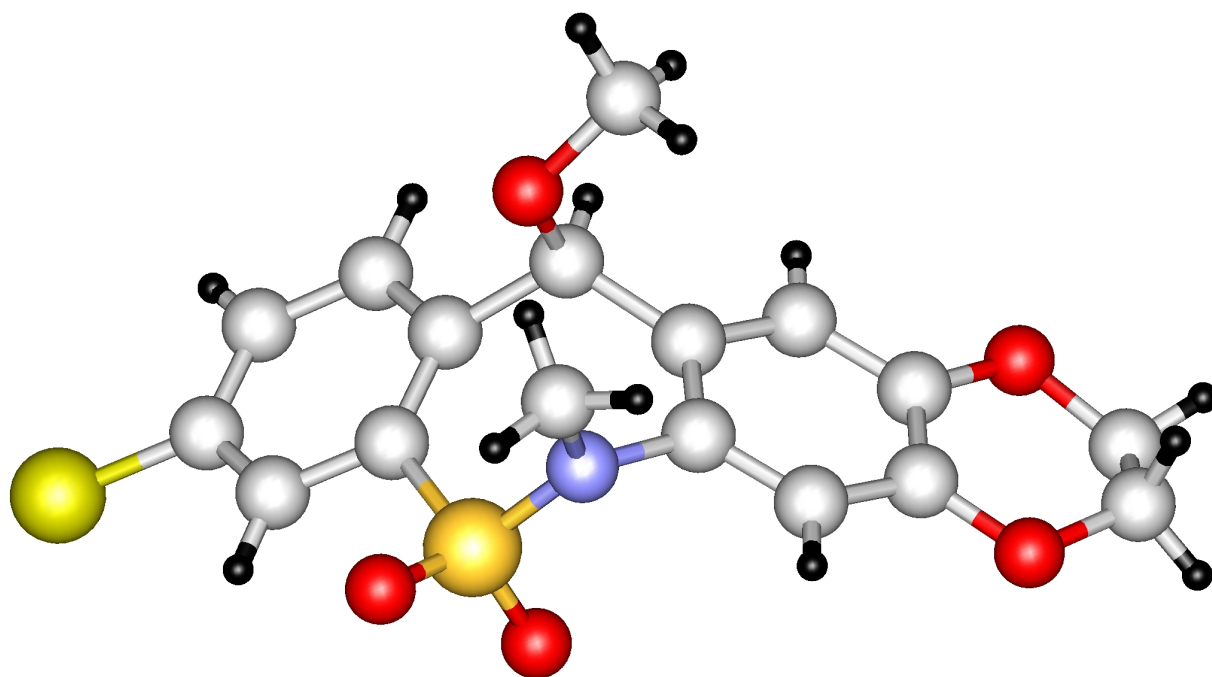

Fig. 2. The molecule (hydrogens were generated by the software)

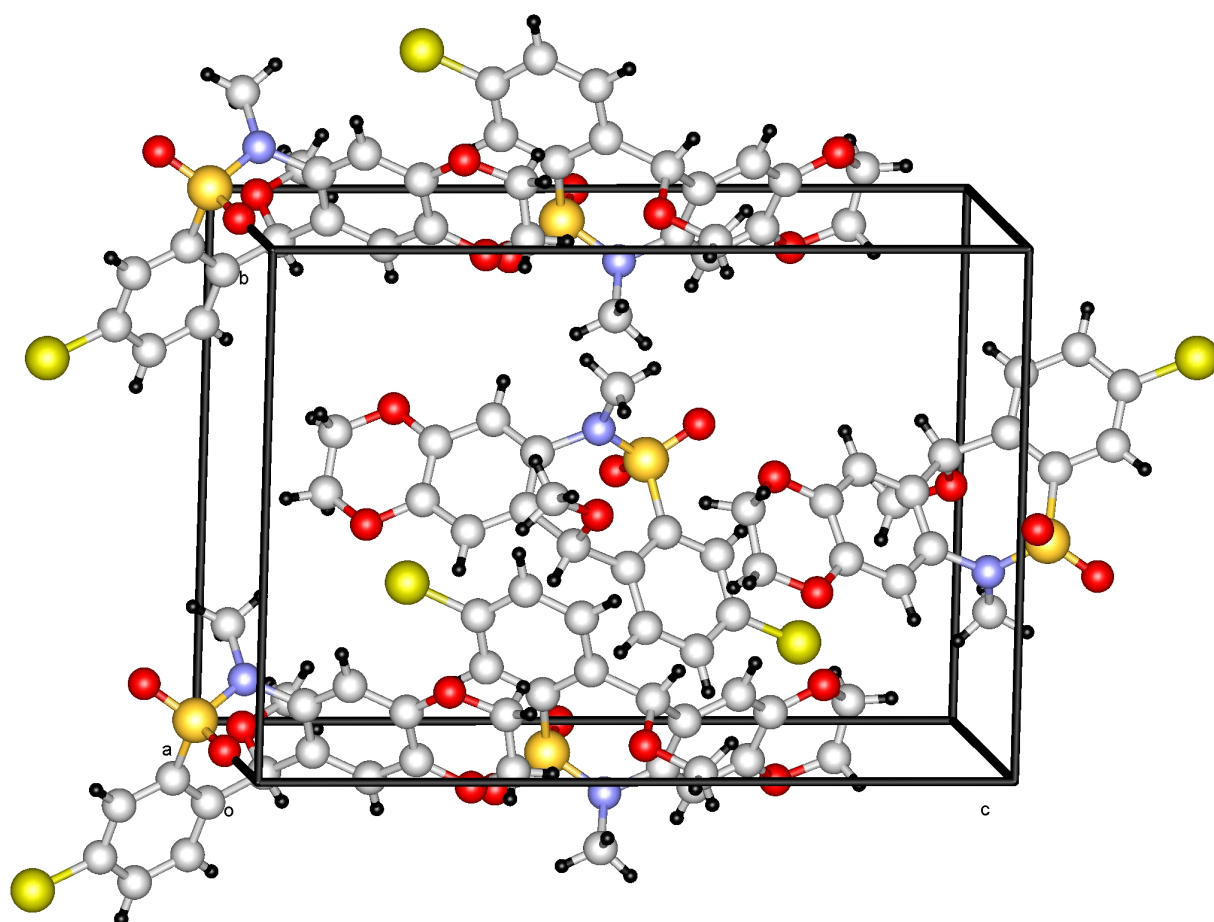

Fig. 3. Packing

## *Experimental*

### Data Collection

A colorless chunk crystal of  $C_{17}H_{16}ClNO_5S$  having approximate dimensions of 0.46 x 0.31 x 0.10 mm was mounted on a cactus needle. All measurements were made on a Rigaku RAXIS RAPID imaging plate area detector with graphite monochromated Cu-K $\alpha$  radiation.

Indexing was performed from 4 oscillations that were exposed for 180 seconds. The crystal-to-detector distance was 127.40 mm.

Cell constants and an orientation matrix for data collection corresponded to a primitive orthorhombic cell with dimensions:

$$\begin{aligned}a &= 8.1686(14) \text{ \AA} \\b &= 11.9644(16) \text{ \AA} \\c &= 17.018(2) \text{ \AA} \\V &= 1663.2(4) \text{ \AA}^3\end{aligned}$$

For  $Z = 4$  and F.W. = 381.83, the calculated density is 1.525 g/cm<sup>3</sup>. The systematic absences of:

$$\begin{aligned}h00: h \pm 2n \\0k0: k \pm 2n \\00l: l \pm 2n\end{aligned}$$

uniquely determine the space group to be:

$$P2_12_12_1 \text{ (\#19)}$$

The data were collected at a temperature of  $20 \pm 1^\circ\text{C}$  to a maximum  $2\theta$  value of  $143.6^\circ$ . A total of 180 oscillation images were collected. A sweep of data was done using  $\omega$  scans from  $20.0$  to  $200.0^\circ$  in  $5.0^\circ$  step, at  $\chi=0.0^\circ$  and  $\phi = 0.0^\circ$ . The exposure rate was 36.0 [sec./ $^\circ$ ]. A second sweep was performed using  $\omega$  scans from  $20.0$  to  $200.0^\circ$  in  $5.0^\circ$  step, at  $\chi=54.0^\circ$  and  $\phi = 0.0^\circ$ . The exposure rate was 36.0 [sec./ $^\circ$ ]. Another sweep was performed using  $\omega$  scans from  $20.0$  to  $200.0^\circ$  in  $5.0^\circ$  step, at  $\chi=54.0^\circ$  and  $\phi = 90.0^\circ$ . The exposure rate was 36.0 [sec./ $^\circ$ ]. Another sweep was performed using  $\omega$  scans from  $20.0$  to  $200.0^\circ$  in  $5.0^\circ$  step, at  $\chi=54.0^\circ$  and  $\phi = 180.0^\circ$ . The exposure rate was 36.0 [sec./ $^\circ$ ]. Another sweep was performed using  $\omega$  scans from  $20.0$  to  $200.0^\circ$  in  $5.0^\circ$  step, at  $\chi=54.0^\circ$  and  $\phi = 270.0^\circ$ . The exposure rate was 36.0 [sec./ $^\circ$ ]. The crystal-to-detector distance was 127.40 mm. Readout was performed in the 0.100 mm pixel mode.

## Data Reduction

Of the 19607 reflections that were collected, 3162 were unique ( $R_{\text{int}} = 0.171$ ).

The linear absorption coefficient,  $\mu$ , for Cu-K $\alpha$  radiation is 34.744 cm<sup>-1</sup>. An empirical absorption correction was applied which resulted in transmission factors ranging from 0.342 to 0.709. The data were corrected for Lorentz and polarization effects.

## Structure Solution and Refinement

The structure was solved by direct methods<sup>1</sup> and expanded using Fourier techniques<sup>2</sup>. The non-hydrogen atoms were refined anisotropically. Hydrogen atoms were refined using the riding model. The final cycle of full-matrix least-squares refinement<sup>3</sup> on F was based on 9893 observed reflections ( $I > 2.00\sigma(I)$ ) and 242 variable parameters and converged (largest parameter shift was 0.00 times its esd) with unweighted and weighted agreement factors of:

$$R = \Sigma ||F_o| - |F_c|| / \Sigma |F_o| = 0.0836$$

$$R_w = [ \Sigma w (|F_o| - |F_c|)^2 / \Sigma w F_o^2 ]^{1/2} = 0.0987$$

The standard deviation of an observation of unit weight<sup>4</sup> was 8.24. Unit weights were used. Plots of  $\Sigma w (|F_o| - |F_c|)^2$  versus  $|F_o|$ , reflection order in data collection,  $\sin \theta/\lambda$  and various classes of indices showed no unusual trends. The maximum and minimum peaks on the final difference Fourier map corresponded to 1.83 and 1.83 e<sup>-</sup>/Å<sup>3</sup>, respectively.

Neutral atom scattering factors were taken from Cromer and Waber<sup>5</sup>. Anomalous dispersion effects were included in Fcalc<sup>6</sup>; the values for  $\Delta f'$  and  $\Delta f''$  were those of Creagh and McAuley<sup>7</sup>. The values for the mass attenuation coefficients are those of Creagh and Hubbell<sup>8</sup>. All calculations were performed using the CrystalStructure<sup>9,10</sup> crystallographic software package.

## *References*

- (1) SIR92: Altomare, A., Cascarano, G., Giacovazzo, C., Guagliardi, A., Burla, M., Polidori, G., and Camalli, M. (1994) J. Appl. Cryst., 27, 435.
- (2) DIRDIF99: Beurskens, P.T., Admiraal, G., Beurskens, G., Bosman, W.P., de Gelder, R., Israel, R. and Smits, J.M.M.(1999). The DIRDIF-99 program system, Technical Report of the Crystallography Laboratory, University of Nijmegen, The Netherlands.

(3) Least Squares function minimized:

$$\sum w(|F_o| - |F_c|)^2 \quad \text{where } w = \text{Least Squares weights.}$$

(4) Standard deviation of an observation of unit weight:

$$[\sum w(|F_o| - |F_c|)^2 / (N_o - N_v)]^{1/2}$$

where:  $N_o$  = number of observations

$N_v$  = number of variables

(5) Cromer, D. T. & Waber, J. T.; "International Tables for X-ray Crystallography", Vol. IV, The Kynoch Press, Birmingham, England, Table 2.2 A (1974).

(6) Ibers, J. A. & Hamilton, W. C.; Acta Crystallogr., 17, 781 (1964).

(7) Creagh, D. C. & McAuley, W.J. ; "International Tables for Crystallography", Vol C, (A.J.C. Wilson, ed.), Kluwer Academic Publishers, Boston, Table 4.2.6.8, pages 219-222 (1992).

(8) Creagh, D. C. & Hubbell, J.H.; "International Tables for Crystallography", Vol C, (A.J.C. Wilson, ed.), Kluwer Academic Publishers, Boston, Table 4.2.4.3, pages 200-206 (1992).

(9) CrystalStructure 3.7.0: Crystal Structure Analysis Package, Rigaku and Rigaku/MSK (2000-2005). 9009 New Trails Dr. The Woodlands TX 77381 USA.

(10) CRYSTALS Issue 10: Watkin, D.J., Prout, C.K. Carruthers, J.R. & Betteridge, P.W. Chemical Crystallography Laboratory, Oxford, UK. (1996)

## EXPERIMENTAL DETAILS

### A. Crystal Data

|                      |                                                                                          |
|----------------------|------------------------------------------------------------------------------------------|
| Empirical Formula    | C <sub>17</sub> H <sub>16</sub> ClNO <sub>5</sub> S                                      |
| Formula Weight       | 381.83                                                                                   |
| Crystal Color, Habit | colorless, chunk                                                                         |
| Crystal Dimensions   | 0.46 X 0.31 X 0.10 mm                                                                    |
| Crystal System       | orthorhombic                                                                             |
| Lattice Type         | Primitive                                                                                |
| Indexing Images      | 4 oscillations @ 180.0 seconds                                                           |
| Detector Position    | 127.40 mm                                                                                |
| Pixel Size           | 0.100 mm                                                                                 |
| Lattice Parameters   | a = 8.1686(14) Å<br>b = 11.9644(16) Å<br>c = 17.018(2) Å<br>V = 1663.2(4) Å <sup>3</sup> |
| Space Group          | P2 <sub>1</sub> 2 <sub>1</sub> 2 <sub>1</sub> (#19)                                      |
| Z value              | 4                                                                                        |
| D <sub>calc</sub>    | 1.525 g/cm <sup>3</sup>                                                                  |
| F <sub>000</sub>     | 792.00                                                                                   |
| μ(CuKα)              | 34.744 cm <sup>-1</sup>                                                                  |



## B. Intensity Measurements

|                                                           |                                                                       |
|-----------------------------------------------------------|-----------------------------------------------------------------------|
| Diffractometer                                            | Rigaku RAXIS-RAPID                                                    |
| Radiation                                                 | CuK $\alpha$ ( $\lambda$ = 1.54187 Å)<br>graphite monochromated       |
| Detector Aperture                                         | 280 mm x 256 mm                                                       |
| Data Images                                               | 180 exposures                                                         |
| $\omega$ oscillation Range ( $\chi$ =0.0, $\phi$ =0.0)    | 20.0 - 200.0 $^{\circ}$                                               |
| Exposure Rate                                             | 36.0 sec./ $^{\circ}$                                                 |
| $\omega$ oscillation Range ( $\chi$ =54.0, $\phi$ =0.0)   | 20.0 - 200.0 $^{\circ}$                                               |
| Exposure Rate                                             | 36.0 sec./ $^{\circ}$                                                 |
| $\omega$ oscillation Range ( $\chi$ =54.0, $\phi$ =90.0)  | 20.0 - 200.0 $^{\circ}$                                               |
| Exposure Rate                                             | 36.0 sec./ $^{\circ}$                                                 |
| $\omega$ oscillation Range ( $\chi$ =54.0, $\phi$ =180.0) | 20.0 - 200.0 $^{\circ}$                                               |
| Exposure Rate                                             | 36.0 sec./ $^{\circ}$                                                 |
| $\omega$ oscillation Range ( $\chi$ =54.0, $\phi$ =270.0) | 20.0 - 200.0 $^{\circ}$                                               |
| Exposure Rate                                             | 36.0 sec./ $^{\circ}$                                                 |
| Detector Position                                         | 127.40 mm                                                             |
| Pixel Size                                                | 0.100 mm                                                              |
| $2\theta_{\max}$                                          | 143.6 $^{\circ}$                                                      |
| No. of Reflections Measured                               | Total: 19607<br>Unique: 3162 ( $R_{\text{int}}$ = 0.171)              |
| Corrections                                               | Lorentz-polarization<br>Absorption<br>(trans. factors: 0.342 - 0.709) |

### C. Structure Solution and Refinement

|                                          |                                |
|------------------------------------------|--------------------------------|
| Structure Solution                       | Direct Methods (SIR92)         |
| Refinement                               | Full-matrix least-squares on F |
| Function Minimized                       | $\Sigma w ( Fo  -  Fc )^2$     |
| Least Squares Weights                    | 1                              |
| $2\theta_{\text{max}}$ cutoff            | 143.6 $^{\circ}$               |
| Anomalous Dispersion                     | All non-hydrogen atoms         |
| No. Observations ( $I > 2.00\sigma(I)$ ) | 9893                           |
| No. Variables                            | 242                            |
| Reflection/Parameter Ratio               | 40.88                          |
| Residuals: R ( $I > 2.00\sigma(I)$ )     | 0.0836                         |
| Residuals: Rw ( $I > 2.00\sigma(I)$ )    | 0.0987                         |
| Goodness of Fit Indicator                | 8.237                          |
| Max Shift/Error in Final Cycle           | 0.000                          |
| Maximum peak in Final Diff. Map          | 1.83 e $^{-}/\text{\AA}^3$     |
| Minimum peak in Final Diff. Map          | 1.83 e $^{-}/\text{\AA}^3$     |

Table 1. Atomic coordinates and B<sub>iso</sub>/B<sub>eq</sub>

| atom  | x          | y            | z           | B <sub>eq</sub> |
|-------|------------|--------------|-------------|-----------------|
| Cl(2) | 0.8454(3)  | 0.27778(18)  | 0.26105(12) | 7.79(7)         |
| S(1)  | 0.9503(3)  | -0.05377(18) | 0.46100(13) | 4.89(6)         |
| O(3)  | 0.5524(7)  | 0.0046(4)    | 0.5569(3)   | 5.63(16)        |
| O(4)  | 1.1071(6)  | -0.0143(4)   | 0.4876(2)   | 5.48(15)        |
| O(5)  | 0.9422(7)  | -0.1215(4)   | 0.3928(2)   | 6.37(16)        |
| O(6)  | 1.1439(8)  | -0.1280(4)   | 0.7801(4)   | 6.69(19)        |
| O(7)  | 0.9734(7)  | 0.0700(4)    | 0.8263(3)   | 6.52(19)        |
| N(1)  | 0.8685(8)  | -0.1210(4)   | 0.5314(4)   | 4.38(18)        |
| C(1)  | 0.8053(10) | 0.0222(7)    | 0.6295(5)   | 4.1(2)          |
| C(10) | 0.8913(11) | -0.0745(7)   | 0.6098(5)   | 4.4(2)          |
| C(11) | 0.7380(10) | 0.1252(7)    | 0.4986(5)   | 4.3(2)          |
| C(12) | 0.8663(10) | 0.1161(7)    | 0.3705(5)   | 4.8(2)          |
| C(13) | 0.6766(9)  | 0.2306(6)    | 0.4787(4)   | 4.9(2)          |
| C(14) | 0.6794(10) | 0.0763(7)    | 0.5763(4)   | 4.7(2)          |
| C(15) | 0.8382(11) | 0.0676(6)    | 0.7029(5)   | 5.0(2)          |
| C(16) | 0.7123(11) | 0.2782(7)    | 0.4067(5)   | 5.9(2)          |
| C(17) | 0.9991(10) | -0.1237(6)   | 0.6601(5)   | 4.9(2)          |
| C(18) | 0.8047(11) | 0.2203(8)    | 0.3524(5)   | 5.7(3)          |
| C(19) | 0.9504(11) | 0.0214(7)    | 0.7547(5)   | 4.6(2)          |
| C(20) | 1.1034(13) | 0.0246(9)    | 0.8706(5)   | 8.2(3)          |
| C(21) | 1.0314(12) | -0.0782(7)   | 0.7332(5)   | 4.9(2)          |
| C(22) | 0.8336(9)  | 0.0689(5)    | 0.4434(4)   | 3.6(2)          |
| C(23) | 0.4597(10) | -0.0364(7)   | 0.6238(4)   | 7.0(2)          |
| C(24) | 0.7471(8)  | -0.2103(5)   | 0.5180(4)   | 6.3(2)          |
| C(25) | 1.1416(17) | -0.0850(9)   | 0.8566(6)   | 10.8(4)         |
| H(1)  | 0.9350     | 0.0789       | 0.3338      | 5.78            |
| H(2)  | 0.6119     | 0.2693       | 0.5163      | 5.94            |
| H(3)  | 0.7809     | 0.1331       | 0.7186      | 6.00            |
| H(4)  | 0.6751     | 0.3511       | 0.3935      | 7.03            |
| H(5)  | 1.0547     | -0.1893      | 0.6435      | 5.91            |
| H(6)  | 0.6313     | 0.1358       | 0.6052      | 5.69            |
| H(7)  | 1.1994     | 0.0664       | 0.8591      | 9.90            |
| H(8)  | 1.0767     | 0.0330       | 0.9246      | 9.90            |
| H(9)  | 1.0621     | -0.1279      | 0.8840      | 12.99           |
| H(10) | 1.2467     | -0.0984      | 0.8787      | 12.98           |
| H(11) | 0.5099     | -0.1019      | 0.6442      | 8.38            |
| H(12) | 0.3510     | -0.0531      | 0.6079      | 8.38            |

Table 1. Atomic coordinates and B<sub>iso</sub>/B<sub>eq</sub> (continued)

| atom  | x      | y       | z      | B <sub>eq</sub> |
|-------|--------|---------|--------|-----------------|
| H(13) | 0.4577 | 0.0199  | 0.6632 | 8.37            |
| H(14) | 0.6401 | -0.1793 | 0.5178 | 7.58            |
| H(15) | 0.7559 | -0.2634 | 0.5593 | 7.58            |
| H(16) | 0.7674 | -0.2462 | 0.4691 | 7.58            |

$$B_{eq} = 8/3 \pi^2 (U_{11}(aa^*)^2 + U_{22}(bb^*)^2 + U_{33}(cc^*)^2 + 2U_{12}(aa^*bb^*)\cos \gamma + 2U_{13}(aa^*cc^*)\cos \beta + 2U_{23}(bb^*cc^*)\cos \alpha)$$

Table 2. Anisotropic displacement parameters

| atom  | U <sub>11</sub> | U <sub>22</sub> | U <sub>33</sub> | U <sub>12</sub> | U <sub>13</sub> | U <sub>23</sub> |
|-------|-----------------|-----------------|-----------------|-----------------|-----------------|-----------------|
| Cl(2) | 0.162(2)        | 0.0726(15)      | 0.0614(16)      | -0.0058(17)     | -0.007(2)       | 0.0152(13)      |
| S(1)  | 0.085(2)        | 0.0486(13)      | 0.0524(15)      | 0.0076(15)      | 0.0081(16)      | 0.0009(13)      |
| O(3)  | 0.070(4)        | 0.076(4)        | 0.068(4)        | -0.016(3)       | -0.001(3)       | 0.007(3)        |
| O(4)  | 0.053(3)        | 0.072(3)        | 0.083(4)        | -0.002(3)       | -0.006(3)       | 0.014(3)        |
| O(5)  | 0.135(5)        | 0.055(3)        | 0.053(3)        | 0.017(3)        | 0.010(4)        | -0.014(2)       |
| O(6)  | 0.105(5)        | 0.085(4)        | 0.064(4)        | 0.022(4)        | -0.020(4)       | 0.012(3)        |
| O(7)  | 0.102(5)        | 0.083(4)        | 0.063(4)        | -0.002(4)       | -0.016(4)       | -0.017(3)       |
| N(1)  | 0.081(5)        | 0.030(3)        | 0.055(5)        | -0.008(3)       | -0.001(4)       | 0.001(3)        |
| C(1)  | 0.062(7)        | 0.047(6)        | 0.049(6)        | -0.005(5)       | -0.006(5)       | 0.003(5)        |
| C(10) | 0.065(7)        | 0.042(6)        | 0.059(6)        | 0.001(5)        | -0.010(5)       | 0.006(5)        |
| C(11) | 0.070(6)        | 0.045(5)        | 0.047(6)        | 0.008(5)        | -0.005(5)       | -0.001(4)       |
| C(12) | 0.083(7)        | 0.040(5)        | 0.060(6)        | -0.005(5)       | 0.014(5)        | -0.005(4)       |
| C(13) | 0.078(7)        | 0.049(5)        | 0.061(6)        | 0.018(5)        | 0.001(6)        | 0.002(5)        |
| C(14) | 0.062(6)        | 0.062(7)        | 0.057(6)        | -0.005(5)       | -0.018(6)       | -0.011(5)       |
| C(15) | 0.075(7)        | 0.055(6)        | 0.060(6)        | 0.006(5)        | 0.001(5)        | -0.011(5)       |
| C(16) | 0.109(9)        | 0.044(6)        | 0.069(7)        | -0.001(6)       | -0.017(7)       | 0.006(5)        |
| C(17) | 0.081(8)        | 0.052(6)        | 0.055(6)        | 0.001(5)        | -0.006(5)       | 0.003(5)        |
| C(18) | 0.109(9)        | 0.045(6)        | 0.062(7)        | -0.004(6)       | -0.012(6)       | 0.001(5)        |
| C(19) | 0.073(6)        | 0.050(6)        | 0.052(6)        | -0.011(5)       | -0.011(6)       | 0.003(5)        |
| C(20) | 0.111(10)       | 0.126(10)       | 0.076(8)        | 0.017(9)        | -0.022(7)       | 0.008(7)        |
| C(21) | 0.082(7)        | 0.039(6)        | 0.065(7)        | -0.003(5)       | -0.010(6)       | 0.015(5)        |
| C(22) | 0.062(6)        | 0.035(5)        | 0.041(5)        | -0.006(4)       | -0.006(5)       | -0.004(4)       |
| C(23) | 0.078(7)        | 0.086(7)        | 0.101(7)        | 0.002(6)        | 0.025(7)        | 0.012(6)        |
| C(24) | 0.103(7)        | 0.050(6)        | 0.086(7)        | -0.017(5)       | 0.007(6)        | -0.008(5)       |
| C(25) | 0.202(16)       | 0.106(10)       | 0.104(10)       | 0.030(10)       | -0.090(10)      | -0.013(8)       |

The general temperature factor expression:  $\exp(-2\pi^2(a^2U_{11}h^2 + b^2U_{22}k^2 + c^2U_{33}l^2 + 2a*b*U_{12}hk + 2a*c*U_{13}hl + 2b*c*U_{23}kl))$

Table 3. Bond lengths (Å)

| atom  | atom  | distance  | atom  | atom  | distance  |
|-------|-------|-----------|-------|-------|-----------|
| Cl(2) | C(18) | 1.732(9)  | S(1)  | O(4)  | 1.438(6)  |
| S(1)  | O(5)  | 1.417(5)  | S(1)  | N(1)  | 1.590(6)  |
| S(1)  | C(22) | 1.775(7)  | O(3)  | C(14) | 1.386(10) |
| O(3)  | C(23) | 1.452(9)  | O(6)  | C(21) | 1.355(11) |
| O(6)  | C(25) | 1.401(13) | O(7)  | C(19) | 1.363(11) |
| O(7)  | C(20) | 1.411(12) | N(1)  | C(10) | 1.457(11) |
| N(1)  | C(24) | 1.476(9)  | C(1)  | C(10) | 1.395(12) |
| C(1)  | C(14) | 1.515(12) | C(1)  | C(15) | 1.389(12) |
| C(10) | C(17) | 1.362(12) | C(11) | C(13) | 1.400(11) |
| C(11) | C(14) | 1.523(12) | C(11) | C(22) | 1.394(11) |
| C(12) | C(18) | 1.380(12) | C(12) | C(22) | 1.389(11) |
| C(12) | H(1)  | 0.950     | C(13) | C(16) | 1.382(12) |
| C(13) | H(2)  | 0.950     | C(14) | H(6)  | 0.950     |
| C(15) | C(19) | 1.387(12) | C(15) | H(3)  | 0.950     |
| C(16) | C(18) | 1.380(13) | C(16) | H(4)  | 0.950     |
| C(17) | C(21) | 1.382(13) | C(17) | H(5)  | 0.950     |
| C(19) | C(21) | 1.412(13) | C(20) | C(25) | 1.369(16) |
| C(20) | H(7)  | 0.950     | C(20) | H(8)  | 0.950     |
| C(23) | H(11) | 0.950     | C(23) | H(12) | 0.950     |
| C(23) | H(13) | 0.950     | C(24) | H(14) | 0.950     |
| C(24) | H(15) | 0.950     | C(24) | H(16) | 0.950     |
| C(25) | H(9)  | 0.950     | C(25) | H(10) | 0.950     |

Table 4. Bond angles (°)

| atom  | atom  | atom  | angle    | atom  | atom  | atom  | angle    |
|-------|-------|-------|----------|-------|-------|-------|----------|
| O(4)  | S(1)  | O(5)  | 119.1(3) | O(4)  | S(1)  | N(1)  | 107.7(3) |
| O(4)  | S(1)  | C(22) | 105.1(3) | O(5)  | S(1)  | N(1)  | 107.9(3) |
| O(5)  | S(1)  | C(22) | 108.1(3) | N(1)  | S(1)  | C(22) | 108.6(3) |
| C(14) | O(3)  | C(23) | 114.3(5) | C(21) | O(6)  | C(25) | 112.2(7) |
| C(19) | O(7)  | C(20) | 114.6(7) | S(1)  | N(1)  | C(10) | 116.3(5) |
| S(1)  | N(1)  | C(24) | 122.2(5) | C(10) | N(1)  | C(24) | 120.2(6) |
| C(10) | C(1)  | C(14) | 123.5(7) | C(10) | C(1)  | C(15) | 116.4(7) |
| C(14) | C(1)  | C(15) | 120.1(7) | N(1)  | C(10) | C(1)  | 118.2(7) |
| N(1)  | C(10) | C(17) | 119.6(7) | C(1)  | C(10) | C(17) | 122.2(8) |
| C(13) | C(11) | C(14) | 116.4(7) | C(13) | C(11) | C(22) | 118.2(7) |
| C(14) | C(11) | C(22) | 125.1(7) | C(18) | C(12) | C(22) | 119.8(7) |
| C(18) | C(12) | H(1)  | 119.4    | C(22) | C(12) | H(1)  | 120.7    |
| C(11) | C(13) | C(16) | 120.7(7) | C(11) | C(13) | H(2)  | 118.4    |
| C(16) | C(13) | H(2)  | 120.9    | O(3)  | C(14) | C(1)  | 112.7(6) |
| O(3)  | C(14) | C(11) | 105.4(6) | O(3)  | C(14) | H(6)  | 106.2    |
| C(1)  | C(14) | C(11) | 118.0(7) | C(1)  | C(14) | H(6)  | 107.0    |
| C(11) | C(14) | H(6)  | 106.9    | C(1)  | C(15) | C(19) | 123.0(7) |
| C(1)  | C(15) | H(3)  | 118.6    | C(19) | C(15) | H(3)  | 118.4    |
| C(13) | C(16) | C(18) | 120.1(8) | C(13) | C(16) | H(4)  | 121.3    |
| C(18) | C(16) | H(4)  | 118.6    | C(10) | C(17) | C(21) | 121.3(8) |
| C(10) | C(17) | H(5)  | 118.6    | C(21) | C(17) | H(5)  | 120.1    |
| Cl(2) | C(18) | C(12) | 119.3(6) | Cl(2) | C(18) | C(16) | 120.4(7) |
| C(12) | C(18) | C(16) | 120.3(8) | O(7)  | C(19) | C(15) | 119.3(7) |
| O(7)  | C(19) | C(21) | 121.9(8) | C(15) | C(19) | C(21) | 118.7(8) |
| O(7)  | C(20) | C(25) | 116.6(9) | O(7)  | C(20) | H(7)  | 108.0    |
| O(7)  | C(20) | H(8)  | 107.6    | C(25) | C(20) | H(7)  | 106.3    |
| C(25) | C(20) | H(8)  | 108.7    | H(7)  | C(20) | H(8)  | 109.5    |
| O(6)  | C(21) | C(17) | 119.1(7) | O(6)  | C(21) | C(19) | 122.4(8) |
| C(17) | C(21) | C(19) | 118.5(8) | S(1)  | C(22) | C(11) | 125.9(6) |
| S(1)  | C(22) | C(12) | 112.5(6) | C(11) | C(22) | C(12) | 120.9(7) |
| O(3)  | C(23) | H(11) | 109.9    | O(3)  | C(23) | H(12) | 109.6    |
| O(3)  | C(23) | H(13) | 108.9    | H(11) | C(23) | H(12) | 109.5    |
| H(11) | C(23) | H(13) | 109.5    | H(12) | C(23) | H(13) | 109.5    |
| N(1)  | C(24) | H(14) | 109.6    | N(1)  | C(24) | H(15) | 108.6    |
| N(1)  | C(24) | H(16) | 110.2    | H(14) | C(24) | H(15) | 109.5    |
| H(14) | C(24) | H(16) | 109.5    | H(15) | C(24) | H(16) | 109.5    |
| O(6)  | C(25) | C(20) | 121.1(9) | O(6)  | C(25) | H(9)  | 105.5    |

Table 4. Bond angles (°) (continued)

| atom  | atom  | atom  | angle | atom  | atom  | atom  | angle |
|-------|-------|-------|-------|-------|-------|-------|-------|
| O(6)  | C(25) | H(10) | 107.0 | C(20) | C(25) | H(9)  | 106.1 |
| C(20) | C(25) | H(10) | 107.4 | H(9)  | C(25) | H(10) | 109.5 |

Table 5. Torsion Angles( $^{\circ}$ )

| atom1 | atom2 | atom3 | atom4 | angle     | atom1 | atom2 | atom3 | atom4 | angle     |
|-------|-------|-------|-------|-----------|-------|-------|-------|-------|-----------|
| O(4)  | S(1)  | N(1)  | C(10) | 39.3(6)   | O(4)  | S(1)  | N(1)  | C(24) | -153.7(5) |
| O(4)  | S(1)  | C(22) | C(11) | -88.3(7)  | O(4)  | S(1)  | C(22) | C(12) | 82.1(6)   |
| O(5)  | S(1)  | N(1)  | C(10) | 169.1(5)  | O(5)  | S(1)  | N(1)  | C(24) | -23.9(6)  |
| O(5)  | S(1)  | C(22) | C(11) | 143.6(7)  | O(5)  | S(1)  | C(22) | C(12) | -46.1(6)  |
| N(1)  | S(1)  | C(22) | C(11) | 26.7(8)   | N(1)  | S(1)  | C(22) | C(12) | -163.0(5) |
| C(22) | S(1)  | N(1)  | C(10) | -74.0(6)  | C(22) | S(1)  | N(1)  | C(24) | 93.0(5)   |
| C(23) | O(3)  | C(14) | C(1)  | 60.2(8)   | C(23) | O(3)  | C(14) | C(11) | -169.8(6) |
| C(21) | O(6)  | C(25) | C(20) | -32.6(15) | C(25) | O(6)  | C(21) | C(17) | -169.2(9) |
| C(25) | O(6)  | C(21) | C(19) | 13.6(12)  | C(19) | O(7)  | C(20) | C(25) | -27.8(12) |
| C(20) | O(7)  | C(19) | C(15) | -172.8(8) | C(20) | O(7)  | C(19) | C(21) | 10.5(12)  |
| S(1)  | N(1)  | C(10) | C(1)  | 72.6(9)   | S(1)  | N(1)  | C(10) | C(17) | -105.0(8) |
| C(24) | N(1)  | C(10) | C(1)  | -94.7(8)  | C(24) | N(1)  | C(10) | C(17) | 87.7(9)   |
| C(10) | C(1)  | C(14) | O(3)  | 58.0(10)  | C(10) | C(1)  | C(14) | C(11) | -65.3(11) |
| C(14) | C(1)  | C(10) | N(1)  | 5.1(12)   | C(14) | C(1)  | C(10) | C(17) | -177.4(8) |
| C(10) | C(1)  | C(15) | C(19) | 0.4(11)   | C(15) | C(1)  | C(10) | N(1)  | -176.1(7) |
| C(15) | C(1)  | C(10) | C(17) | 1.4(13)   | C(14) | C(1)  | C(15) | C(19) | 179.2(8)  |
| C(15) | C(1)  | C(14) | O(3)  | -120.7(8) | C(15) | C(1)  | C(14) | C(11) | 116.0(9)  |
| N(1)  | C(10) | C(17) | C(21) | 176.1(7)  | C(1)  | C(10) | C(17) | C(21) | -1.4(13)  |
| C(13) | C(11) | C(14) | O(3)  | 97.6(8)   | C(13) | C(11) | C(14) | C(1)  | -135.5(8) |
| C(14) | C(11) | C(13) | C(16) | -174.9(7) | C(13) | C(11) | C(22) | S(1)  | 169.3(6)  |
| C(13) | C(11) | C(22) | C(12) | -0.3(10)  | C(22) | C(11) | C(13) | C(16) | -1.0(12)  |
| C(14) | C(11) | C(22) | S(1)  | -17.4(12) | C(14) | C(11) | C(22) | C(12) | 173.0(7)  |
| C(22) | C(11) | C(14) | O(3)  | -75.8(9)  | C(22) | C(11) | C(14) | C(1)  | 51.0(11)  |
| C(18) | C(12) | C(22) | S(1)  | -170.4(6) | C(18) | C(12) | C(22) | C(11) | 0.5(11)   |
| C(22) | C(12) | C(18) | Cl(2) | -179.6(6) | C(22) | C(12) | C(18) | C(16) | 0.7(12)   |
| C(11) | C(13) | C(16) | C(18) | 2.2(13)   | C(1)  | C(15) | C(19) | O(7)  | -178.8(8) |
| C(1)  | C(15) | C(19) | C(21) | -2.1(13)  | C(13) | C(16) | C(18) | Cl(2) | 178.3(7)  |
| C(13) | C(16) | C(18) | C(12) | -2.0(14)  | C(10) | C(17) | C(21) | O(6)  | -177.7(8) |
| C(10) | C(17) | C(21) | C(19) | -0.4(11)  | O(7)  | C(19) | C(21) | O(6)  | -4.1(14)  |
| O(7)  | C(19) | C(21) | C(17) | 178.7(8)  | C(15) | C(19) | C(21) | O(6)  | 179.3(8)  |
| C(15) | C(19) | C(21) | C(17) | 2.0(13)   | O(7)  | C(20) | C(25) | O(6)  | 41.2(16)  |

The sign is positive if when looking from atom 2 to atom 3 a clock-wise motion of atom 1 would superimpose it on atom 4.

Table 6. Distances beyond the asymmetric unit out to 3.60 Å

| atom  | atom                 | distance  | atom  | atom                | distance  |
|-------|----------------------|-----------|-------|---------------------|-----------|
| Cl(2) | O(5) <sup>11</sup>   | 3.364(5)  | Cl(2) | H(6) <sup>23</sup>  | 3.422     |
| Cl(2) | H(7) <sup>31</sup>   | 3.013     | Cl(2) | H(11) <sup>41</sup> | 3.128     |
| Cl(2) | H(13) <sup>21</sup>  | 2.892     | Cl(2) | H(15) <sup>41</sup> | 3.536     |
| S(1)  | H(7) <sup>51</sup>   | 3.350     | S(1)  | H(10) <sup>51</sup> | 3.377     |
| S(1)  | H(14) <sup>61</sup>  | 3.568     | S(1)  | H(15) <sup>61</sup> | 3.338     |
| O(3)  | C(20) <sup>41</sup>  | 3.434(11) | O(3)  | H(8) <sup>41</sup>  | 2.526     |
| O(3)  | H(9) <sup>41</sup>   | 3.421     | O(4)  | C(13) <sup>21</sup> | 3.489(9)  |
| O(4)  | C(16) <sup>21</sup>  | 3.458(10) | O(4)  | C(20) <sup>51</sup> | 3.093(11) |
| O(4)  | C(24) <sup>61</sup>  | 3.488(8)  | O(4)  | C(25) <sup>51</sup> | 3.254(13) |
| O(4)  | H(2) <sup>21</sup>   | 2.933     | O(4)  | H(4) <sup>21</sup>  | 2.867     |
| O(4)  | H(7) <sup>51</sup>   | 2.769     | O(4)  | H(8) <sup>51</sup>  | 2.805     |
| O(4)  | H(10) <sup>51</sup>  | 2.584     | O(4)  | H(12) <sup>71</sup> | 2.894     |
| O(4)  | H(15) <sup>61</sup>  | 3.031     | O(4)  | H(16) <sup>61</sup> | 3.236     |
| O(5)  | Cl(2) <sup>81</sup>  | 3.364(5)  | O(5)  | C(24) <sup>61</sup> | 3.543(9)  |
| O(5)  | H(3) <sup>41</sup>   | 3.483     | O(5)  | H(7) <sup>51</sup>  | 3.055     |
| O(5)  | H(11) <sup>61</sup>  | 3.414     | O(5)  | H(14) <sup>61</sup> | 3.257     |
| O(5)  | H(15) <sup>61</sup>  | 3.021     | O(6)  | H(3) <sup>91</sup>  | 2.924     |
| O(6)  | H(12) <sup>71</sup>  | 3.500     | O(7)  | H(5) <sup>101</sup> | 2.934     |
| O(7)  | H(15) <sup>101</sup> | 3.557     | N(1)  | H(14) <sup>61</sup> | 3.366     |
| C(1)  | H(4) <sup>21</sup>   | 3.402     | C(10) | H(4) <sup>21</sup>  | 3.539     |
| C(11) | H(2) <sup>21</sup>   | 3.315     | C(11) | H(8) <sup>41</sup>  | 3.431     |
| C(11) | H(9) <sup>41</sup>   | 3.133     | C(12) | H(2) <sup>21</sup>  | 3.101     |
| C(12) | H(9) <sup>41</sup>   | 3.510     | C(12) | H(10) <sup>51</sup> | 3.171     |
| C(13) | O(4) <sup>31</sup>   | 3.489(9)  | C(13) | H(2) <sup>21</sup>  | 3.557     |
| C(13) | H(9) <sup>101</sup>  | 3.589     | C(13) | H(9) <sup>41</sup>  | 2.812     |
| C(13) | H(10) <sup>101</sup> | 3.236     | C(14) | H(8) <sup>41</sup>  | 3.571     |
| C(15) | H(4) <sup>21</sup>   | 3.348     | C(16) | O(4) <sup>31</sup>  | 3.458(10) |
| C(16) | H(2) <sup>21</sup>   | 3.564     | C(16) | H(6) <sup>21</sup>  | 3.580     |
| C(16) | H(9) <sup>41</sup>   | 2.899     | C(16) | H(12) <sup>21</sup> | 3.487     |
| C(16) | H(13) <sup>21</sup>  | 3.356     | C(17) | H(12) <sup>71</sup> | 3.125     |
| C(17) | H(16) <sup>61</sup>  | 3.473     | C(18) | H(2) <sup>21</sup>  | 3.363     |
| C(18) | H(6) <sup>21</sup>   | 3.256     | C(18) | H(9) <sup>41</sup>  | 3.239     |
| C(18) | H(13) <sup>21</sup>  | 3.361     | C(19) | H(4) <sup>21</sup>  | 3.473     |
| C(20) | O(3) <sup>111</sup>  | 3.434(11) | C(20) | O(4) <sup>121</sup> | 3.093(11) |
| C(20) | H(15) <sup>101</sup> | 3.029     | C(21) | H(12) <sup>71</sup> | 3.384     |
| C(22) | H(2) <sup>21</sup>   | 3.064     | C(22) | H(8) <sup>41</sup>  | 3.581     |
| C(22) | H(9) <sup>41</sup>   | 3.460     | C(23) | H(4) <sup>31</sup>  | 3.226     |



Table 6. Distances beyond the asymmetric unit out to 3.60 Å (continued)

| atom  | atom                 | distance  | atom  | atom                 | distance |
|-------|----------------------|-----------|-------|----------------------|----------|
| C(23) | H(8) <sup>4)</sup>   | 3.403     | C(23) | H(16) <sup>13)</sup> | 3.426    |
| C(24) | O(4) <sup>13)</sup>  | 3.488(8)  | C(24) | O(5) <sup>13)</sup>  | 3.543(9) |
| C(24) | H(5) <sup>13)</sup>  | 3.386     | C(24) | H(7) <sup>9)</sup>   | 3.421    |
| C(24) | H(8) <sup>9)</sup>   | 3.529     | C(24) | H(14) <sup>6)</sup>  | 3.524    |
| C(25) | O(4) <sup>12)</sup>  | 3.254(13) | C(25) | H(1) <sup>12)</sup>  | 3.481    |
| C(25) | H(2) <sup>9)</sup>   | 3.431     | H(1)  | C(25) <sup>5)</sup>  | 3.481    |
| H(1)  | H(2) <sup>2)</sup>   | 3.449     | H(1)  | H(7) <sup>5)</sup>   | 3.483    |
| H(1)  | H(10) <sup>5)</sup>  | 2.720     | H(1)  | H(11) <sup>4)</sup>  | 3.270    |
| H(1)  | H(13) <sup>4)</sup>  | 3.256     | H(2)  | O(4) <sup>3)</sup>   | 2.933    |
| H(2)  | C(11) <sup>3)</sup>  | 3.315     | H(2)  | C(12) <sup>3)</sup>  | 3.101    |
| H(2)  | C(13) <sup>3)</sup>  | 3.557     | H(2)  | C(16) <sup>3)</sup>  | 3.564    |
| H(2)  | C(18) <sup>3)</sup>  | 3.363     | H(2)  | C(22) <sup>3)</sup>  | 3.064    |
| H(2)  | C(25) <sup>10)</sup> | 3.431     | H(2)  | H(1) <sup>3)</sup>   | 3.449    |
| H(2)  | H(9) <sup>10)</sup>  | 3.389     | H(2)  | H(9) <sup>4)</sup>   | 3.154    |
| H(2)  | H(10) <sup>10)</sup> | 2.653     | H(3)  | O(5) <sup>11)</sup>  | 3.483    |
| H(3)  | O(6) <sup>10)</sup>  | 2.924     | H(3)  | H(5) <sup>10)</sup>  | 3.439    |
| H(3)  | H(9) <sup>10)</sup>  | 3.587     | H(4)  | O(4) <sup>3)</sup>   | 2.867    |
| H(4)  | C(1) <sup>3)</sup>   | 3.402     | H(4)  | C(10) <sup>3)</sup>  | 3.539    |
| H(4)  | C(15) <sup>3)</sup>  | 3.348     | H(4)  | C(19) <sup>3)</sup>  | 3.473    |
| H(4)  | C(23) <sup>2)</sup>  | 3.226     | H(4)  | H(9) <sup>4)</sup>   | 3.303    |
| H(4)  | H(12) <sup>2)</sup>  | 2.812     | H(4)  | H(13) <sup>2)</sup>  | 2.940    |
| H(5)  | O(7) <sup>9)</sup>   | 2.934     | H(5)  | C(24) <sup>6)</sup>  | 3.386    |
| H(5)  | H(3) <sup>9)</sup>   | 3.439     | H(5)  | H(7) <sup>9)</sup>   | 3.585    |
| H(5)  | H(12) <sup>7)</sup>  | 2.980     | H(5)  | H(14) <sup>6)</sup>  | 3.239    |
| H(5)  | H(16) <sup>6)</sup>  | 2.700     | H(6)  | Cl(2) <sup>3)</sup>  | 3.422    |
| H(6)  | C(16) <sup>3)</sup>  | 3.580     | H(6)  | C(18) <sup>3)</sup>  | 3.256    |
| H(6)  | H(10) <sup>10)</sup> | 3.344     | H(7)  | Cl(2) <sup>2)</sup>  | 3.013    |
| H(7)  | S(1) <sup>12)</sup>  | 3.350     | H(7)  | O(4) <sup>12)</sup>  | 2.769    |
| H(7)  | O(5) <sup>12)</sup>  | 3.055     | H(7)  | C(24) <sup>10)</sup> | 3.421    |
| H(7)  | H(1) <sup>12)</sup>  | 3.483     | H(7)  | H(5) <sup>10)</sup>  | 3.585    |
| H(7)  | H(15) <sup>10)</sup> | 2.492     | H(8)  | O(3) <sup>11)</sup>  | 2.526    |
| H(8)  | O(4) <sup>12)</sup>  | 2.805     | H(8)  | C(11) <sup>11)</sup> | 3.431    |
| H(8)  | C(14) <sup>11)</sup> | 3.571     | H(8)  | C(22) <sup>11)</sup> | 3.581    |
| H(8)  | C(23) <sup>11)</sup> | 3.403     | H(8)  | C(24) <sup>10)</sup> | 3.529    |
| H(8)  | H(12) <sup>11)</sup> | 3.184     | H(8)  | H(14) <sup>11)</sup> | 2.952    |
| H(8)  | H(15) <sup>10)</sup> | 2.807     | H(8)  | H(16) <sup>10)</sup> | 3.446    |
| H(9)  | O(3) <sup>11)</sup>  | 3.421     | H(9)  | C(11) <sup>11)</sup> | 3.133    |

Table 6. Distances beyond the asymmetric unit out to 3.60 Å (continued)

| atom  | atom                  | distance | atom  | atom                  | distance |
|-------|-----------------------|----------|-------|-----------------------|----------|
| H(9)  | C(12) <sup>(11)</sup> | 3.510    | H(9)  | C(13) <sup>(9)</sup>  | 3.589    |
| H(9)  | C(13) <sup>(11)</sup> | 2.812    | H(9)  | C(16) <sup>(11)</sup> | 2.899    |
| H(9)  | C(18) <sup>(11)</sup> | 3.239    | H(9)  | C(22) <sup>(11)</sup> | 3.460    |
| H(9)  | H(2) <sup>(9)</sup>   | 3.389    | H(9)  | H(2) <sup>(11)</sup>  | 3.154    |
| H(9)  | H(3) <sup>(9)</sup>   | 3.587    | H(9)  | H(4) <sup>(11)</sup>  | 3.303    |
| H(10) | S(1) <sup>(12)</sup>  | 3.377    | H(10) | O(4) <sup>(12)</sup>  | 2.584    |
| H(10) | C(12) <sup>(12)</sup> | 3.171    | H(10) | C(13) <sup>(9)</sup>  | 3.236    |
| H(10) | H(1) <sup>(12)</sup>  | 2.720    | H(10) | H(2) <sup>(9)</sup>   | 2.653    |
| H(10) | H(6) <sup>(9)</sup>   | 3.344    | H(11) | Cl(2) <sup>(11)</sup> | 3.128    |
| H(11) | O(5) <sup>(13)</sup>  | 3.414    | H(11) | H(1) <sup>(11)</sup>  | 3.270    |
| H(11) | H(16) <sup>(13)</sup> | 3.309    | H(12) | O(4) <sup>(14)</sup>  | 2.894    |
| H(12) | O(6) <sup>(14)</sup>  | 3.500    | H(12) | C(16) <sup>(3)</sup>  | 3.487    |
| H(12) | C(17) <sup>(14)</sup> | 3.125    | H(12) | C(21) <sup>(14)</sup> | 3.384    |
| H(12) | H(4) <sup>(3)</sup>   | 2.812    | H(12) | H(5) <sup>(14)</sup>  | 2.980    |
| H(12) | H(8) <sup>(4)</sup>   | 3.184    | H(12) | H(16) <sup>(13)</sup> | 2.820    |
| H(13) | Cl(2) <sup>(3)</sup>  | 2.892    | H(13) | C(16) <sup>(3)</sup>  | 3.356    |
| H(13) | C(18) <sup>(3)</sup>  | 3.361    | H(13) | H(1) <sup>(11)</sup>  | 3.256    |
| H(13) | H(4) <sup>(3)</sup>   | 2.940    | H(14) | S(1) <sup>(13)</sup>  | 3.568    |
| H(14) | O(5) <sup>(13)</sup>  | 3.257    | H(14) | N(1) <sup>(13)</sup>  | 3.366    |
| H(14) | C(24) <sup>(13)</sup> | 3.524    | H(14) | H(5) <sup>(13)</sup>  | 3.239    |
| H(14) | H(8) <sup>(4)</sup>   | 2.952    | H(14) | H(15) <sup>(13)</sup> | 3.470    |
| H(14) | H(16) <sup>(13)</sup> | 3.180    | H(15) | Cl(2) <sup>(11)</sup> | 3.536    |
| H(15) | S(1) <sup>(13)</sup>  | 3.338    | H(15) | O(4) <sup>(13)</sup>  | 3.031    |
| H(15) | O(5) <sup>(13)</sup>  | 3.021    | H(15) | O(7) <sup>(9)</sup>   | 3.557    |
| H(15) | C(20) <sup>(9)</sup>  | 3.029    | H(15) | H(7) <sup>(9)</sup>   | 2.492    |
| H(15) | H(8) <sup>(9)</sup>   | 2.807    | H(15) | H(14) <sup>(6)</sup>  | 3.470    |
| H(16) | O(4) <sup>(13)</sup>  | 3.236    | H(16) | C(17) <sup>(13)</sup> | 3.473    |
| H(16) | C(23) <sup>(6)</sup>  | 3.426    | H(16) | H(5) <sup>(13)</sup>  | 2.700    |
| H(16) | H(8) <sup>(9)</sup>   | 3.446    | H(16) | H(11) <sup>(6)</sup>  | 3.309    |
| H(16) | H(12) <sup>(6)</sup>  | 2.820    | H(16) | H(14) <sup>(6)</sup>  | 3.180    |

Symmetry Operators:

- |                            |                          |
|----------------------------|--------------------------|
| (1) -X+2,Y+1/2,-Z+1/2      | (2) X+1/2,-Y+1/2,-Z+1    |
| (3) X+1/2-1,-Y+1/2,-Z+1    | (4) -X+1/2+1,-Y,Z+1/2-1  |
| (5) -X+1/2+2,-Y,Z+1/2-1    | (6) X+1/2,-Y+1/2-1,-Z+1  |
| (7) X+1,Y,Z                | (8) -X+2,Y+1/2-1,-Z+1/2  |
| (9) -X+2,Y+1/2-1,-Z+1/2+1  | (10) -X+2,Y+1/2,-Z+1/2+1 |
| (11) -X+1/2+1,-Y,Z+1/2     | (12) -X+1/2+2,-Y,Z+1/2   |
| (13) X+1/2-1,-Y+1/2-1,-Z+1 | (14) X-1,Y,Z             |
