# Supplementary material for: Synthesis of new tetra- and pentacyclic, methylenedioxy- and ethylenedioxy-substituted derivatives of the dibenzo[ c , f ][1,2]thiazepine ring system
Source: publisher site journal article supplement (doi:10.3762/bjoc.21.205), 2025-12-09
Supplement: Additional file 2 [file compound 25 structure report.pdf › compound 25 structure report.pdf]

**85623**

**2366-BGE**

Submitted by: Berecz Gabor  
Operator: Dancso Andras

X-ray Structure Report

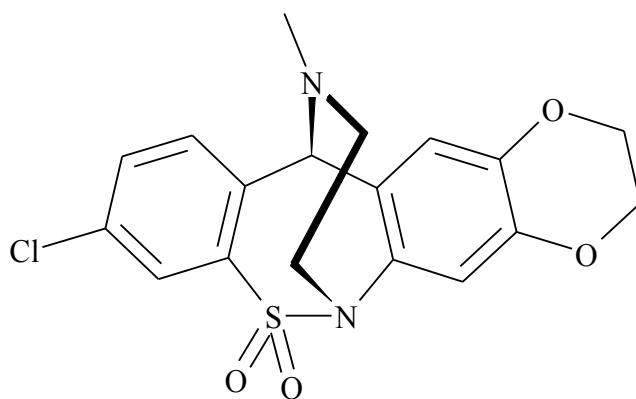

April 1, 2010

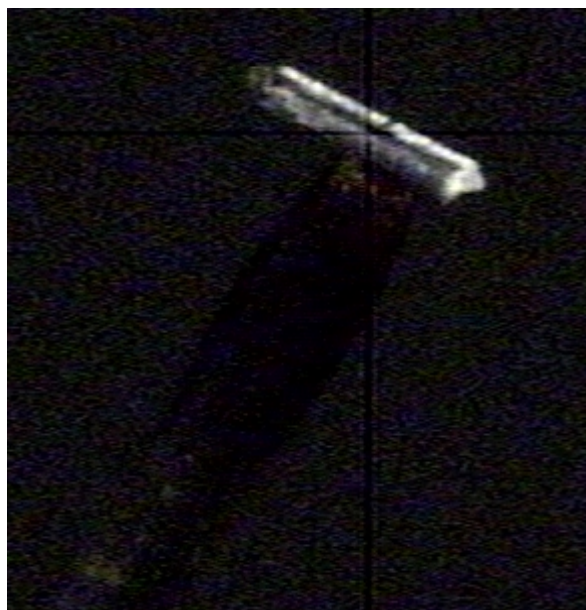

Fig. 1. The crystal

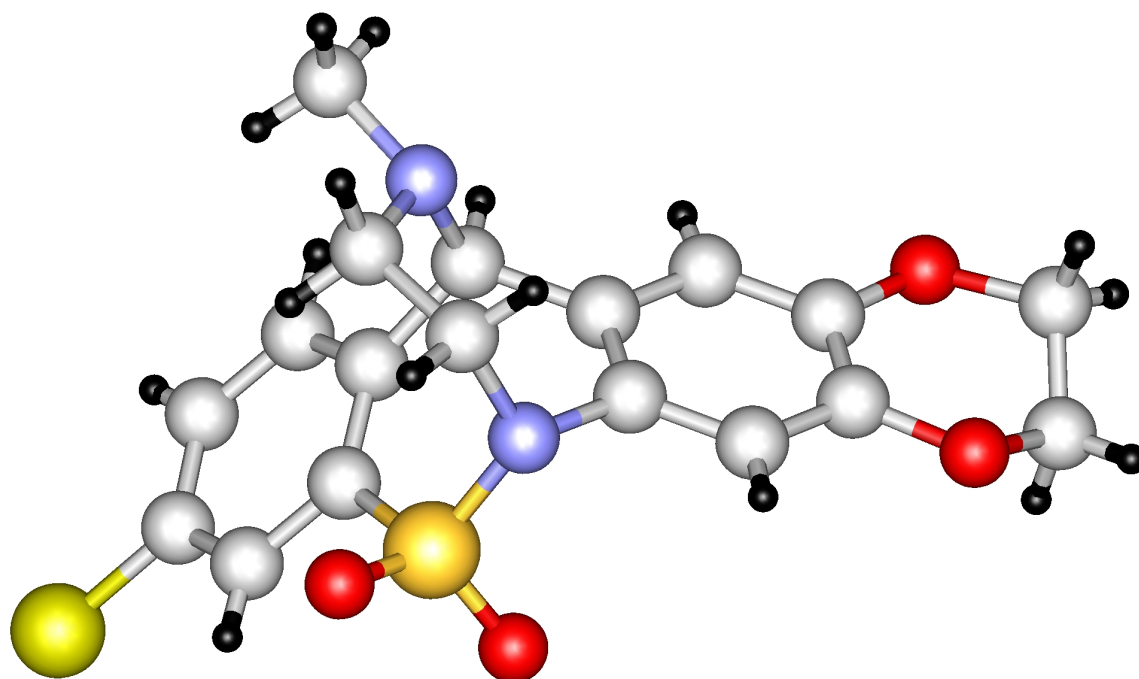

Fig. 2. The molecule

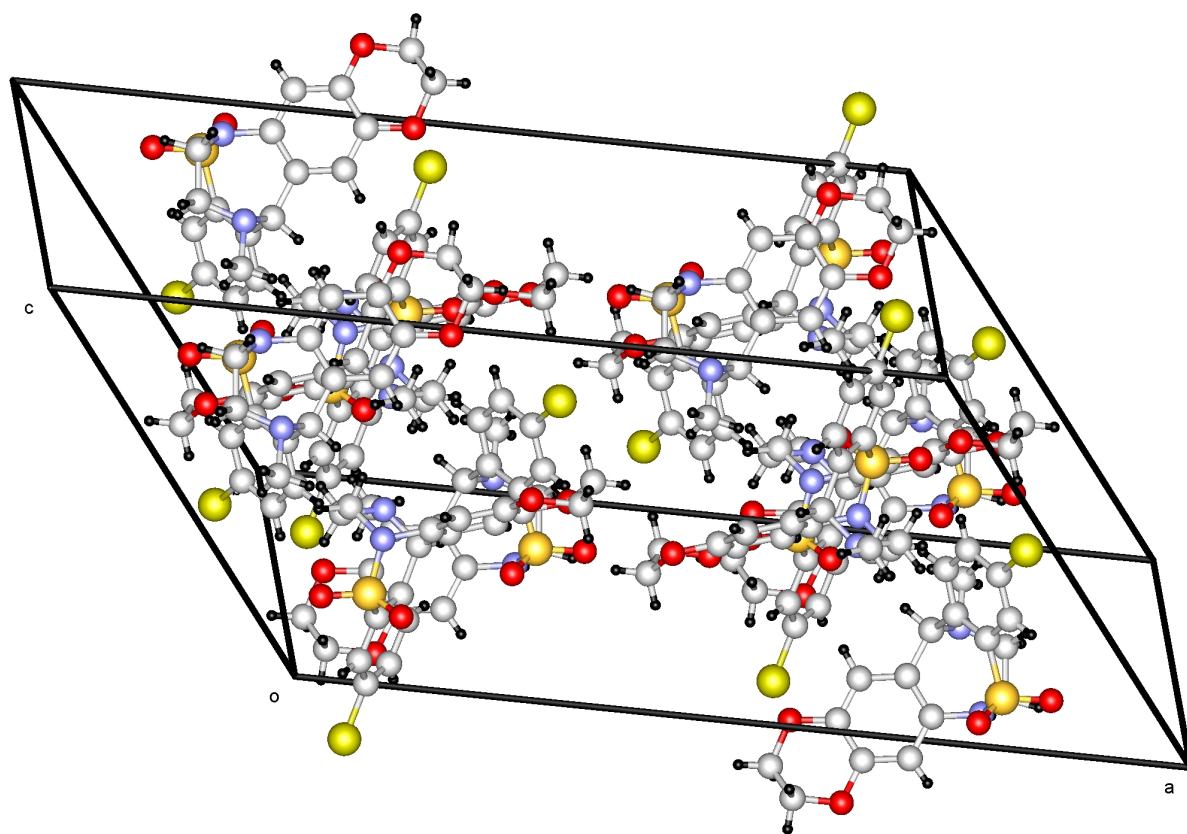

Fig. 3. Packing

## *Experimental*

### Data Collection

A colorless prism crystal of  $C_{18}H_{17}ClN_2O_4S$  having approximate dimensions of 0.37 x 0.10 x 0.04 mm was mounted on a cactus needle. All measurements were made on a Rigaku RAXIS RAPID imaging plate area detector with graphite monochromated Mo-K $\alpha$  radiation.

Indexing was performed from 4 oscillations that were exposed for 300 seconds. The crystal-to-detector distance was 127.40 mm.

Cell constants and an orientation matrix for data collection corresponded to a C-centered monoclinic cell with dimensions:

$$\begin{aligned}a &= 26.820(2) \text{ \AA} \\b &= 10.0640(10) \text{ \AA} \quad \beta = 127.6638(16)^\circ \\c &= 16.4457(15) \text{ \AA} \\V &= 3514.0(6) \text{ \AA}^3\end{aligned}$$

For  $Z = 8$  and F.W. = 392.86, the calculated density is 1.485 g/cm<sup>3</sup>. Based on the systematic absences of:

$$\begin{aligned}\text{hkl: } &h+k \pm 2n \\ \text{h0l: } &l \pm 2n\end{aligned}$$

packing considerations, a statistical analysis of intensity distribution, and the successful solution and refinement of the structure, the space group was determined to be:

### **C2/c (#15)**

The data were collected at a temperature of  $20 \pm 1^\circ\text{C}$  to a maximum  $2\theta$  value of  $54.9^\circ$ . A total of 180 oscillation images were collected. A sweep of data was done using  $\omega$  scans from  $20.0$  to  $200.0^\circ$  in  $5.0^\circ$  step, at  $\chi=0.0^\circ$  and  $\phi = 0.0^\circ$ . The exposure rate was 120.0 [sec./ $^\circ$ ]. A second sweep was performed using  $\omega$  scans from  $20.0$  to  $200.0^\circ$  in  $5.0^\circ$  step, at  $\chi=54.0^\circ$  and  $\phi = 0.0^\circ$ . The exposure rate was 120.0 [sec./ $^\circ$ ]. Another sweep was performed using  $\omega$  scans from  $20.0$  to  $200.0^\circ$  in  $5.0^\circ$  step, at  $\chi=54.0^\circ$  and  $\phi = 90.0^\circ$ . The exposure rate was 120.0 [sec./ $^\circ$ ]. Another sweep was performed using  $\omega$  scans from  $20.0$  to  $200.0^\circ$  in  $5.0^\circ$  step, at  $\chi=54.0^\circ$  and  $\phi = 180.0^\circ$ . The exposure rate was 120.0 [sec./ $^\circ$ ]. Another sweep was performed using  $\omega$  scans from  $20.0$  to  $200.0^\circ$  in  $5.0^\circ$  step, at  $\chi=54.0^\circ$  and  $\phi = 270.0^\circ$ . The exposure rate was 120.0 [sec./ $^\circ$ ]. The crystal-to-detector distance was 127.40 mm. Readout was performed in the 0.100 mm pixel mode.

## Data Reduction

Of the 67252 reflections that were collected, 4020 were unique ( $R_{\text{int}} = 0.098$ ).

The linear absorption coefficient,  $\mu$ , for Mo-K $\alpha$  radiation is 3.631 cm<sup>-1</sup>. The data were corrected for Lorentz and polarization effects.

## Structure Solution and Refinement

The structure was solved by direct methods<sup>1</sup> and expanded using Fourier techniques<sup>2</sup>. The non-hydrogen atoms were refined isotropically. Some hydrogen atoms were refined isotropically and the rest were refined using the riding model. The final cycle of full-matrix least-squares refinement<sup>3</sup> on F was based on 26624 observed reflections ( $I > 2.00\sigma(I)$ ) and 169 variable parameters and converged (largest parameter shift was 0.00 times its esd) with unweighted and weighted agreement factors of:

$$R = \Sigma ||F_o| - |F_c|| / \Sigma |F_o| = 0.0905$$

$$R_w = [ \Sigma w (|F_o| - |F_c|)^2 / \Sigma w F_o^2 ]^{1/2} = 0.0947$$

The standard deviation of an observation of unit weight<sup>4</sup> was 3.16. Unit weights were used. Plots of  $\Sigma w (|F_o| - |F_c|)^2$  versus  $|F_o|$ , reflection order in data collection,  $\sin \theta/\lambda$  and various classes of indices showed no unusual trends. The maximum and minimum peaks on the final difference Fourier map corresponded to 15.90 and -20.60 e<sup>-</sup>/Å<sup>3</sup>, respectively.

Neutral atom scattering factors were taken from Cromer and Waber<sup>5</sup>. Anomalous dispersion effects were included in Fcalc<sup>6</sup>; the values for  $\Delta f'$  and  $\Delta f''$  were those of Creagh and McAuley<sup>7</sup>. The values for the mass attenuation coefficients are those of Creagh and Hubbell<sup>8</sup>. All calculations were performed using the CrystalStructure<sup>9,10</sup> crystallographic software package.

## *References*

- (1) SIR92: Altomare, A., Cascarano, G., Giacovazzo, C., Guagliardi, A., Burla, M., Polidori, G., and Camalli, M. (1994) J. Appl. Cryst., 27, 435.
- (2) DIRDIF99: Beurskens, P.T., Admiraal, G., Beurskens, G., Bosman, W.P., de Gelder, R., Israel, R. and Smits, J.M.M. (1999). The DIRDIF-99 program system, Technical Report of the Crystallography Laboratory, University of Nijmegen, The Netherlands.

(3) Least Squares function minimized:

$$\sum w(|F_o| - |F_c|)^2 \quad \text{where } w = \text{Least Squares weights.}$$

(4) Standard deviation of an observation of unit weight:

$$[\sum w(|F_o| - |F_c|)^2 / (N_o - N_v)]^{1/2}$$

where:  $N_o$  = number of observations

$N_v$  = number of variables

(5) Cromer, D. T. & Waber, J. T.; "International Tables for X-ray Crystallography", Vol. IV, The Kynoch Press, Birmingham, England, Table 2.2 A (1974).

(6) Ibers, J. A. & Hamilton, W. C.; Acta Crystallogr., 17, 781 (1964).

(7) Creagh, D. C. & McAuley, W.J. ; "International Tables for Crystallography", Vol C, (A.J.C. Wilson, ed.), Kluwer Academic Publishers, Boston, Table 4.2.6.8, pages 219-222 (1992).

(8) Creagh, D. C. & Hubbell, J.H.; "International Tables for Crystallography", Vol C, (A.J.C. Wilson, ed.), Kluwer Academic Publishers, Boston, Table 4.2.4.3, pages 200-206 (1992).

(9) CrystalStructure 3.7.0: Crystal Structure Analysis Package, Rigaku and Rigaku/MSK (2000-2005). 9009 New Trails Dr. The Woodlands TX 77381 USA.

(10) CRYSTALS Issue 10: Watkin, D.J., Prout, C.K. Carruthers, J.R. & Betteridge, P.W. Chemical Crystallography Laboratory, Oxford, UK. (1996)

## EXPERIMENTAL DETAILS

### A. Crystal Data

|                         |                                                                                                                                                                |
|-------------------------|----------------------------------------------------------------------------------------------------------------------------------------------------------------|
| Empirical Formula       | $\text{C}_{18}\text{H}_{17}\text{ClN}_2\text{O}_4\text{S}$                                                                                                     |
| Formula Weight          | 392.86                                                                                                                                                         |
| Crystal Color, Habit    | colorless, prism                                                                                                                                               |
| Crystal Dimensions      | 0.37 X 0.10 X 0.04 mm                                                                                                                                          |
| Crystal System          | monoclinic                                                                                                                                                     |
| Lattice Type            | C-centered                                                                                                                                                     |
| Indexing Images         | 4 oscillations @ 300.0 seconds                                                                                                                                 |
| Detector Position       | 127.40 mm                                                                                                                                                      |
| Pixel Size              | 0.100 mm                                                                                                                                                       |
| Lattice Parameters      | $a = 26.820(2) \text{ \AA}$<br>$b = 10.0640(10) \text{ \AA}$<br>$c = 16.4457(15) \text{ \AA}$<br>$\beta = 127.6638(16)^\circ$<br>$V = 3514.0(6) \text{ \AA}^3$ |
| Space Group             | C2/c (#15)                                                                                                                                                     |
| Z value                 | 8                                                                                                                                                              |
| $D_{\text{calc}}$       | $1.485 \text{ g/cm}^3$                                                                                                                                         |
| $F_{000}$               | 1632.00                                                                                                                                                        |
| $\mu(\text{MoK}\alpha)$ | $3.631 \text{ cm}^{-1}$                                                                                                                                        |



## B. Intensity Measurements

|                                                           |                                                                            |
|-----------------------------------------------------------|----------------------------------------------------------------------------|
| Diffractometer                                            | Rigaku RAXIS-RAPID                                                         |
| Radiation                                                 | MoK $\alpha$ ( $\lambda = 0.71075 \text{ \AA}$ )<br>graphite monochromated |
| Detector Aperture                                         | 280 mm x 256 mm                                                            |
| Data Images                                               | 180 exposures                                                              |
| $\omega$ oscillation Range ( $\chi=0.0$ , $\phi=0.0$ )    | 20.0 - 200.0 $^{\circ}$                                                    |
| Exposure Rate                                             | 120.0 sec./ $^{\circ}$                                                     |
| $\omega$ oscillation Range ( $\chi=54.0$ , $\phi=0.0$ )   | 20.0 - 200.0 $^{\circ}$                                                    |
| Exposure Rate                                             | 120.0 sec./ $^{\circ}$                                                     |
| $\omega$ oscillation Range ( $\chi=54.0$ , $\phi=90.0$ )  | 20.0 - 200.0 $^{\circ}$                                                    |
| Exposure Rate                                             | 120.0 sec./ $^{\circ}$                                                     |
| $\omega$ oscillation Range ( $\chi=54.0$ , $\phi=180.0$ ) | 20.0 - 200.0 $^{\circ}$                                                    |
| Exposure Rate                                             | 120.0 sec./ $^{\circ}$                                                     |
| $\omega$ oscillation Range ( $\chi=54.0$ , $\phi=270.0$ ) | 20.0 - 200.0 $^{\circ}$                                                    |
| Exposure Rate                                             | 120.0 sec./ $^{\circ}$                                                     |
| Detector Position                                         | 127.40 mm                                                                  |
| Pixel Size                                                | 0.100 mm                                                                   |
| $2\theta_{\text{max}}$                                    | 54.9 $^{\circ}$                                                            |
| No. of Reflections Measured                               | Total: 67252<br>Unique: 4020 ( $R_{\text{int}} = 0.098$ )                  |
| Corrections                                               | Lorentz-polarization                                                       |

### C. Structure Solution and Refinement

|                                          |                                |
|------------------------------------------|--------------------------------|
| Structure Solution                       | Direct Methods (SIR92)         |
| Refinement                               | Full-matrix least-squares on F |
| Function Minimized                       | $\Sigma w ( Fo  -  Fc )^2$     |
| Least Squares Weights                    | 1                              |
| $2\theta_{\text{max}}$ cutoff            | 54.9 $^{\circ}$                |
| Anomalous Dispersion                     | All non-hydrogen atoms         |
| No. Observations ( $I > 2.00\sigma(I)$ ) | 26624                          |
| No. Variables                            | 169                            |
| Reflection/Parameter Ratio               | 157.54                         |
| Residuals: R ( $I > 2.00\sigma(I)$ )     | 0.0905                         |
| Residuals: Rw ( $I > 2.00\sigma(I)$ )    | 0.0947                         |
| Goodness of Fit Indicator                | 3.160                          |
| Max Shift/Error in Final Cycle           | 0.000                          |
| Maximum peak in Final Diff. Map          | 15.90 e $^{-}/\text{\AA}^3$    |
| Minimum peak in Final Diff. Map          | -20.60 e $^{-}/\text{\AA}^3$   |

Table 1. Atomic coordinates and B<sub>iso</sub>/B<sub>eq</sub>

| atom  | x           | y            | z            | B <sub>eq</sub> |
|-------|-------------|--------------|--------------|-----------------|
| Cl(1) | 0.97763(4)  | -0.09655(8)  | 0.60461(6)   | 5.370(18)       |
| S(1)  | 0.83848(3)  | -0.10063(6)  | 0.19520(5)   | 2.957(11)       |
| O(1)  | 0.57102(8)  | -0.12741(18) | -0.12311(13) | 4.47(3)         |
| O(3)  | 0.89632(8)  | -0.11378(18) | 0.20867(12)  | 4.09(3)         |
| O(4)  | 0.80468(8)  | -0.21760(17) | 0.18502(12)  | 4.06(3)         |
| O(5)  | 0.55017(9)  | 0.06711(18)  | -0.01904(13) | 4.72(4)         |
| N(1)  | 0.79148(8)  | -0.00902(18) | 0.09347(13)  | 2.78(3)         |
| N(8)  | 0.79954(9)  | 0.2728(2)    | 0.16943(14)  | 3.24(3)         |
| C(9)  | 0.72828(10) | 0.0078(2)    | 0.06310(17)  | 2.70(4)         |
| C(10) | 0.67927(12) | -0.0662(2)   | -0.01596(19) | 3.17(4)         |
| C(11) | 0.90348(12) | -0.0721(2)   | 0.39796(19)  | 3.19(4)         |
| C(12) | 0.82340(10) | 0.0986(2)    | 0.30048(17)  | 2.91(4)         |
| C(13) | 0.85573(10) | -0.0134(2)   | 0.30505(17)  | 2.81(4)         |
| C(14) | 0.71953(10) | 0.0987(2)    | 0.11707(17)  | 2.97(4)         |
| C(15) | 0.81880(12) | 0.1073(2)    | 0.0781(2)    | 3.36(4)         |
| C(16) | 0.65876(11) | 0.1169(2)    | 0.08688(19)  | 3.22(4)         |
| C(17) | 0.61900(11) | -0.0483(2)   | -0.04466(18) | 3.10(4)         |
| C(18) | 0.77380(11) | 0.1797(2)    | 0.20514(18)  | 3.04(4)         |
| C(19) | 0.84544(12) | 0.2168(2)    | 0.1587(2)    | 3.39(4)         |
| C(20) | 0.91847(11) | -0.0207(2)   | 0.48804(19)  | 3.49(4)         |
| C(21) | 0.60946(11) | 0.0439(2)    | 0.00676(18)  | 3.30(4)         |
| C(22) | 0.84100(12) | 0.1462(2)    | 0.3954(2)    | 3.66(5)         |
| C(23) | 0.82580(16) | 0.3931(3)    | 0.2340(2)    | 4.64(6)         |
| C(24) | 0.88814(12) | 0.0877(2)    | 0.4878(2)    | 4.01(5)         |
| C(25) | 0.49882(16) | 0.0044(3)    | -0.1157(2)   | 5.60(7)         |
| C(26) | 0.51629(16) | -0.1277(3)   | -0.1234(2)   | 5.10(6)         |
| H(1)  | 0.9253(7)   | -0.1416(17)  | 0.3995(12)   | 0.9(3)          |
| H(2)  | 0.8176(11)  | 0.222(2)     | 0.3941(18)   | 5.1(6)          |
| H(3)  | 0.8987(13)  | 0.123(2)     | 0.550(2)     | 7.5(8)          |
| H(4)  | 0.7528(9)   | 0.239(2)     | 0.2247(15)   | 3.0(4)          |
| H(5)  | 0.7921(11)  | 0.432(2)     | 0.2313(17)   | 4.8(6)          |
| H(6)  | 0.8609(11)  | 0.363(2)     | 0.3001(19)   | 4.5(5)          |
| H(7)  | 0.8337(12)  | 0.449(2)     | 0.193(2)     | 6.5(7)          |
| H(8)  | 0.8587(10)  | 0.289(2)     | 0.1321(18)   | 4.9(5)          |
| H(9)  | 0.8841(9)   | 0.1800(19)   | 0.2224(16)   | 2.9(4)          |
| H(10) | 0.7856(8)   | 0.1366(17)   | 0.0106(14)   | 1.5(3)          |
| H(11) | 0.8553(11)  | 0.079(2)     | 0.0786(17)   | 4.8(5)          |

Table 1. Atomic coordinates and B<sub>iso</sub>/B<sub>eq</sub> (continued)

| atom  | x          | y         | z           | B <sub>eq</sub> |
|-------|------------|-----------|-------------|-----------------|
| H(12) | 0.6549(11) | 0.177(2)  | 0.128(2)    | 6.2(7)          |
| H(13) | 0.6881(9)  | -0.123(2) | -0.0477(16) | 3.7(5)          |
| H(14) | 0.5258(13) | -0.189(3) | -0.066(2)   | 7.9(8)          |
| H(15) | 0.4917(14) | -0.170(2) | -0.187(2)   | 7.2(8)          |
| H(16) | 0.4625     | -0.0005   | -0.1183     | 6.72            |
| H(17) | 0.4897     | 0.0563    | -0.1716     | 6.72            |

$$B_{eq} = 8/3 \pi^2 (U_{11}(aa^*)^2 + U_{22}(bb^*)^2 + U_{33}(cc^*)^2 + 2U_{12}(aa^*bb^*)\cos \gamma + 2U_{13}(aa^*cc^*)\cos \beta + 2U_{23}(bb^*cc^*)\cos \alpha)$$

Table 2. Bond lengths (Å)

| atom  | atom  | distance  | atom  | atom  | distance   |
|-------|-------|-----------|-------|-------|------------|
| Cl(1) | C(20) | 1.749(2)  | S(1)  | O(3)  | 1.433(2)   |
| S(1)  | O(4)  | 1.432(2)  | S(1)  | N(1)  | 1.6312(17) |
| S(1)  | C(13) | 1.796(2)  | O(1)  | C(17) | 1.387(2)   |
| O(1)  | C(26) | 1.465(5)  | O(5)  | C(21) | 1.392(3)   |
| O(5)  | C(25) | 1.466(3)  | N(1)  | C(9)  | 1.455(3)   |
| N(1)  | C(15) | 1.483(4)  | N(8)  | C(18) | 1.482(4)   |
| N(8)  | C(19) | 1.459(4)  | N(8)  | C(23) | 1.475(3)   |
| C(9)  | C(10) | 1.373(2)  | C(9)  | C(14) | 1.391(4)   |
| C(10) | C(17) | 1.391(4)  | C(10) | H(13) | 0.90(2)    |
| C(11) | C(13) | 1.390(2)  | C(11) | C(20) | 1.377(4)   |
| C(11) | H(1)  | 0.90(2)   | C(12) | C(13) | 1.396(3)   |
| C(12) | C(18) | 1.531(2)  | C(12) | C(22) | 1.410(4)   |
| C(14) | C(16) | 1.395(4)  | C(14) | C(18) | 1.518(2)   |
| C(15) | C(19) | 1.525(3)  | C(15) | H(10) | 0.951(15)  |
| C(15) | H(11) | 1.01(3)   | C(16) | C(21) | 1.377(2)   |
| C(16) | H(12) | 0.96(3)   | C(17) | C(21) | 1.381(4)   |
| C(18) | H(4)  | 1.00(2)   | C(19) | H(8)  | 1.02(3)    |
| C(19) | H(9)  | 0.991(17) | C(20) | C(24) | 1.359(4)   |
| C(22) | C(24) | 1.381(3)  | C(22) | H(2)  | 0.98(2)    |
| C(23) | H(5)  | 0.96(3)   | C(23) | H(6)  | 0.95(2)    |
| C(23) | H(7)  | 0.99(3)   | C(24) | H(3)  | 0.94(3)    |
| C(25) | C(26) | 1.440(5)  | C(25) | H(16) | 0.950      |
| C(25) | H(17) | 0.950     | C(26) | H(14) | 1.02(3)    |
| C(26) | H(15) | 0.93(2)   |       |       |            |

Table 3. Bond angles (°)

| atom  | atom  | atom  | angle      | atom  | atom  | atom  | angle      |
|-------|-------|-------|------------|-------|-------|-------|------------|
| O(3)  | S(1)  | O(4)  | 119.37(12) | O(3)  | S(1)  | N(1)  | 107.21(13) |
| O(3)  | S(1)  | C(13) | 107.48(11) | O(4)  | S(1)  | N(1)  | 107.91(9)  |
| O(4)  | S(1)  | C(13) | 105.96(14) | N(1)  | S(1)  | C(13) | 108.54(11) |
| C(17) | O(1)  | C(26) | 111.2(2)   | C(21) | O(5)  | C(25) | 113.5(2)   |
| S(1)  | N(1)  | C(9)  | 115.2(2)   | S(1)  | N(1)  | C(15) | 117.94(13) |
| C(9)  | N(1)  | C(15) | 116.31(19) | C(18) | N(8)  | C(19) | 115.8(2)   |
| C(18) | N(8)  | C(23) | 111.5(2)   | C(19) | N(8)  | C(23) | 109.7(2)   |
| N(1)  | C(9)  | C(10) | 120.2(2)   | N(1)  | C(9)  | C(14) | 118.22(17) |
| C(10) | C(9)  | C(14) | 121.6(2)   | C(9)  | C(10) | C(17) | 119.5(2)   |
| C(9)  | C(10) | H(13) | 117.2(13)  | C(17) | C(10) | H(13) | 123.3(13)  |
| C(13) | C(11) | C(20) | 119.3(2)   | C(13) | C(11) | H(1)  | 120.5(11)  |
| C(20) | C(11) | H(1)  | 120.2(11)  | C(13) | C(12) | C(18) | 127.4(2)   |
| C(13) | C(12) | C(22) | 115.97(19) | C(18) | C(12) | C(22) | 116.5(2)   |
| S(1)  | C(13) | C(11) | 113.3(2)   | S(1)  | C(13) | C(12) | 124.80(15) |
| C(11) | C(13) | C(12) | 121.8(2)   | C(9)  | C(14) | C(16) | 118.34(19) |
| C(9)  | C(14) | C(18) | 121.6(2)   | C(16) | C(14) | C(18) | 120.0(2)   |
| N(1)  | C(15) | C(19) | 116.1(3)   | N(1)  | C(15) | H(10) | 103.7(13)  |
| N(1)  | C(15) | H(11) | 110.7(14)  | C(19) | C(15) | H(10) | 113.5(11)  |
| C(19) | C(15) | H(11) | 104.9(12)  | H(10) | C(15) | H(11) | 108(2)     |
| C(14) | C(16) | C(21) | 120.0(2)   | C(14) | C(16) | H(12) | 115.9(15)  |
| C(21) | C(16) | H(12) | 123.9(16)  | O(1)  | C(17) | C(10) | 117.8(2)   |
| O(1)  | C(17) | C(21) | 122.8(2)   | C(10) | C(17) | C(21) | 119.4(2)   |
| N(8)  | C(18) | C(12) | 114.8(2)   | N(8)  | C(18) | C(14) | 111.6(2)   |
| N(8)  | C(18) | H(4)  | 104.1(14)  | C(12) | C(18) | C(14) | 114.71(19) |
| C(12) | C(18) | H(4)  | 107.2(11)  | C(14) | C(18) | H(4)  | 103.0(10)  |
| N(8)  | C(19) | C(15) | 113.7(2)   | N(8)  | C(19) | H(8)  | 108.7(17)  |
| N(8)  | C(19) | H(9)  | 115.6(19)  | C(15) | C(19) | H(8)  | 104.0(16)  |
| C(15) | C(19) | H(9)  | 106.3(13)  | H(8)  | C(19) | H(9)  | 107.8(19)  |
| Cl(1) | C(20) | C(11) | 119.2(2)   | Cl(1) | C(20) | C(24) | 119.6(2)   |
| C(11) | C(20) | C(24) | 121.2(2)   | O(5)  | C(21) | C(16) | 116.9(2)   |
| O(5)  | C(21) | C(17) | 122.06(19) | C(16) | C(21) | C(17) | 121.1(2)   |
| C(12) | C(22) | C(24) | 122.4(2)   | C(12) | C(22) | H(2)  | 117.6(14)  |
| C(24) | C(22) | H(2)  | 120.0(14)  | N(8)  | C(23) | H(5)  | 106.3(13)  |
| N(8)  | C(23) | H(6)  | 105.5(14)  | N(8)  | C(23) | H(7)  | 100.3(16)  |
| H(5)  | C(23) | H(6)  | 115(2)     | H(5)  | C(23) | H(7)  | 109(2)     |
| H(6)  | C(23) | H(7)  | 119(2)     | C(20) | C(24) | C(22) | 119.3(3)   |
| C(20) | C(24) | H(3)  | 120.9(16)  | C(22) | C(24) | H(3)  | 119.8(16)  |

Table 3. Bond angles ( $^{\circ}$ ) (continued)

| atom  | atom  | atom  | angle     | atom  | atom  | atom  | angle  |
|-------|-------|-------|-----------|-------|-------|-------|--------|
| O(5)  | C(25) | C(26) | 110.6(2)  | O(5)  | C(25) | H(16) | 109.2  |
| O(5)  | C(25) | H(17) | 109.2     | C(26) | C(25) | H(16) | 109.2  |
| C(26) | C(25) | H(17) | 109.2     | H(16) | C(25) | H(17) | 109.5  |
| O(1)  | C(26) | C(25) | 112.2(3)  | O(1)  | C(26) | H(14) | 108(2) |
| O(1)  | C(26) | H(15) | 92(2)     | C(25) | C(26) | H(14) | 113(2) |
| C(25) | C(26) | H(15) | 118.3(17) | H(14) | C(26) | H(15) | 111(2) |

Table 4. Torsion Angles( $^{\circ}$ )

| atom1 | atom2 | atom3 | atom4 | angle      | atom1 | atom2 | atom3 | atom4 | angle     |
|-------|-------|-------|-------|------------|-------|-------|-------|-------|-----------|
| O(3)  | S(1)  | N(1)  | C(9)  | 175.85(15) | O(3)  | S(1)  | N(1)  | C(15) | -40.6(2)  |
| O(3)  | S(1)  | C(13) | C(11) | -54.3(2)   | O(3)  | S(1)  | C(13) | C(12) | 128.7(2)  |
| O(4)  | S(1)  | N(1)  | C(9)  | 46.1(2)    | O(4)  | S(1)  | N(1)  | C(15) | -170.4(2) |
| O(4)  | S(1)  | C(13) | C(11) | 74.4(2)    | O(4)  | S(1)  | C(13) | C(12) | -102.6(2) |
| N(1)  | S(1)  | C(13) | C(11) | -169.9(2)  | N(1)  | S(1)  | C(13) | C(12) | 13.0(2)   |
| C(13) | S(1)  | N(1)  | C(9)  | -68.32(18) | C(13) | S(1)  | N(1)  | C(15) | 75.2(2)   |
| C(17) | O(1)  | C(26) | C(25) | 47.7(3)    | C(26) | O(1)  | C(17) | C(10) | 162.5(2)  |
| C(26) | O(1)  | C(17) | C(21) | -16.0(3)   | C(21) | O(5)  | C(25) | C(26) | 41.6(4)   |
| C(25) | O(5)  | C(21) | C(16) | 169.5(2)   | C(25) | O(5)  | C(21) | C(17) | -10.8(3)  |
| S(1)  | N(1)  | C(9)  | C(10) | -100.6(2)  | S(1)  | N(1)  | C(9)  | C(14) | 78.6(2)   |
| S(1)  | N(1)  | C(15) | C(19) | -64.0(3)   | C(9)  | N(1)  | C(15) | C(19) | 79.1(2)   |
| C(15) | N(1)  | C(9)  | C(10) | 115.3(2)   | C(15) | N(1)  | C(9)  | C(14) | -65.6(3)  |
| C(18) | N(8)  | C(19) | C(15) | 63.2(2)    | C(19) | N(8)  | C(18) | C(12) | 49.2(2)   |
| C(19) | N(8)  | C(18) | C(14) | -83.5(2)   | C(23) | N(8)  | C(18) | C(12) | -77.1(2)  |
| C(23) | N(8)  | C(18) | C(14) | 150.1(2)   | C(23) | N(8)  | C(19) | C(15) | -169.5(2) |
| N(1)  | C(9)  | C(10) | C(17) | -179.5(2)  | N(1)  | C(9)  | C(14) | C(16) | 178.8(2)  |
| N(1)  | C(9)  | C(14) | C(18) | 0.3(3)     | C(10) | C(9)  | C(14) | C(16) | -2.1(4)   |
| C(10) | C(9)  | C(14) | C(18) | 179.4(2)   | C(14) | C(9)  | C(10) | C(17) | 1.4(4)    |
| C(9)  | C(10) | C(17) | O(1)  | -178.4(2)  | C(9)  | C(10) | C(17) | C(21) | 0.2(3)    |
| C(13) | C(11) | C(20) | Cl(1) | 178.9(2)   | C(13) | C(11) | C(20) | C(24) | -1.1(4)   |
| C(20) | C(11) | C(13) | S(1)  | -175.5(2)  | C(20) | C(11) | C(13) | C(12) | 1.6(4)    |
| C(13) | C(12) | C(18) | N(8)  | -78.3(3)   | C(13) | C(12) | C(18) | C(14) | 53.0(4)   |
| C(18) | C(12) | C(13) | S(1)  | -8.4(4)    | C(18) | C(12) | C(13) | C(11) | 174.8(2)  |
| C(13) | C(12) | C(22) | C(24) | 1.2(4)     | C(22) | C(12) | C(13) | S(1)  | 175.2(2)  |
| C(22) | C(12) | C(13) | C(11) | -1.6(4)    | C(18) | C(12) | C(22) | C(24) | -175.6(3) |
| C(22) | C(12) | C(18) | N(8)  | 98.1(3)    | C(22) | C(12) | C(18) | C(14) | -130.6(3) |
| C(9)  | C(14) | C(16) | C(21) | 1.2(4)     | C(9)  | C(14) | C(18) | N(8)  | 65.3(3)   |
| C(9)  | C(14) | C(18) | C(12) | -67.5(3)   | C(16) | C(14) | C(18) | N(8)  | -113.2(3) |
| C(16) | C(14) | C(18) | C(12) | 114.0(3)   | C(18) | C(14) | C(16) | C(21) | 179.8(2)  |
| N(1)  | C(15) | C(19) | N(8)  | -58.1(2)   | C(14) | C(16) | C(21) | O(5)  | 179.9(2)  |
| C(14) | C(16) | C(21) | C(17) | 0.3(4)     | O(1)  | C(17) | C(21) | O(5)  | -2.2(4)   |
| O(1)  | C(17) | C(21) | C(16) | 177.5(2)   | C(10) | C(17) | C(21) | O(5)  | 179.4(2)  |
| C(10) | C(17) | C(21) | C(16) | -1.0(4)    | Cl(1) | C(20) | C(24) | C(22) | -179.3(2) |
| C(11) | C(20) | C(24) | C(22) | 0.7(5)     | C(12) | C(22) | C(24) | C(20) | -0.8(5)   |
| O(5)  | C(25) | C(26) | O(1)  | -61.5(4)   |       |       |       |       |           |

The sign is positive if when looking from atom 2 to atom 3 a clock-wise motion of atom 1 would superimpose it on atom 4.



Table 5. Distances beyond the asymmetric unit out to 3.60 Å

| atom  | atom                 | distance   | atom  | atom                 | distance   |
|-------|----------------------|------------|-------|----------------------|------------|
| Cl(1) | O(3) <sup>1)</sup>   | 3.5571(16) | Cl(1) | O(5) <sup>2)</sup>   | 3.5654(19) |
| Cl(1) | H(1) <sup>1)</sup>   | 3.57(2)    | Cl(1) | H(9) <sup>1)</sup>   | 3.108(18)  |
| Cl(1) | H(11) <sup>3)</sup>  | 3.04(3)    | S(1)  | H(12) <sup>2)</sup>  | 3.59(3)    |
| S(1)  | H(13) <sup>4)</sup>  | 3.47(2)    | O(1)  | O(1) <sup>5)</sup>   | 3.536(2)   |
| O(1)  | O(3) <sup>4)</sup>   | 3.322(3)   | O(1)  | C(24) <sup>2)</sup>  | 3.375(3)   |
| O(1)  | C(26) <sup>5)</sup>  | 3.306(4)   | O(1)  | H(2) <sup>2)</sup>   | 3.41(2)    |
| O(1)  | H(3) <sup>2)</sup>   | 2.69(2)    | O(1)  | H(15) <sup>5)</sup>  | 2.52(3)    |
| O(1)  | H(17) <sup>5)</sup>  | 3.279      | O(3)  | Cl(1) <sup>1)</sup>  | 3.5571(16) |
| O(3)  | O(1) <sup>4)</sup>   | 3.322(3)   | O(3)  | C(24) <sup>6)</sup>  | 3.512(4)   |
| O(3)  | H(3) <sup>6)</sup>   | 2.66(4)    | O(3)  | H(13) <sup>4)</sup>  | 3.44(2)    |
| O(3)  | H(15) <sup>7)</sup>  | 2.98(2)    | O(4)  | C(22) <sup>2)</sup>  | 3.547(3)   |
| O(4)  | H(2) <sup>2)</sup>   | 2.76(2)    | O(4)  | H(4) <sup>2)</sup>   | 2.75(3)    |
| O(4)  | H(7) <sup>8)</sup>   | 3.43(2)    | O(4)  | H(12) <sup>2)</sup>  | 2.77(3)    |
| O(4)  | H(13) <sup>4)</sup>  | 2.87(2)    | O(5)  | Cl(1) <sup>9)</sup>  | 3.5654(19) |
| O(5)  | O(5) <sup>10)</sup>  | 3.394(3)   | O(5)  | C(25) <sup>10)</sup> | 3.274(6)   |
| O(5)  | H(1) <sup>9)</sup>   | 3.363(18)  | O(5)  | H(6) <sup>2)</sup>   | 3.52(2)    |
| O(5)  | H(14) <sup>10)</sup> | 3.33(4)    | O(5)  | H(16) <sup>10)</sup> | 2.570      |
| N(1)  | H(3) <sup>6)</sup>   | 3.55(4)    | N(8)  | C(15) <sup>11)</sup> | 3.508(2)   |
| N(8)  | H(10) <sup>11)</sup> | 2.559(16)  | C(9)  | H(2) <sup>2)</sup>   | 3.36(2)    |
| C(9)  | H(7) <sup>11)</sup>  | 3.49(3)    | C(9)  | H(8) <sup>11)</sup>  | 3.28(2)    |
| C(10) | H(2) <sup>2)</sup>   | 2.89(3)    | C(10) | H(7) <sup>11)</sup>  | 2.96(3)    |
| C(10) | H(8) <sup>11)</sup>  | 3.18(2)    | C(11) | H(12) <sup>2)</sup>  | 2.86(2)    |
| C(12) | H(5) <sup>2)</sup>   | 3.27(3)    | C(13) | H(12) <sup>2)</sup>  | 3.37(2)    |
| C(14) | H(5) <sup>2)</sup>   | 3.17(3)    | C(14) | H(8) <sup>11)</sup>  | 3.46(2)    |
| C(14) | H(10) <sup>11)</sup> | 3.34(2)    | C(15) | N(8) <sup>11)</sup>  | 3.508(2)   |
| C(15) | C(24) <sup>6)</sup>  | 3.590(5)   | C(15) | H(3) <sup>6)</sup>   | 3.38(3)    |
| C(15) | H(10) <sup>11)</sup> | 3.409(18)  | C(16) | C(23) <sup>2)</sup>  | 3.525(5)   |
| C(16) | H(1) <sup>9)</sup>   | 3.41(2)    | C(16) | H(5) <sup>2)</sup>   | 3.05(2)    |
| C(16) | H(6) <sup>2)</sup>   | 3.38(3)    | C(16) | H(8) <sup>11)</sup>  | 3.47(3)    |
| C(17) | H(2) <sup>2)</sup>   | 3.03(2)    | C(17) | H(3) <sup>2)</sup>   | 3.34(3)    |
| C(17) | H(7) <sup>11)</sup>  | 3.52(4)    | C(17) | H(8) <sup>11)</sup>  | 3.21(2)    |
| C(18) | H(5) <sup>2)</sup>   | 3.56(3)    | C(18) | H(10) <sup>11)</sup> | 3.41(2)    |
| C(19) | H(10) <sup>11)</sup> | 3.213(16)  | C(20) | H(11) <sup>3)</sup>  | 2.92(3)    |
| C(20) | H(12) <sup>2)</sup>  | 3.49(2)    | C(20) | H(14) <sup>9)</sup>  | 3.56(2)    |
| C(21) | H(5) <sup>2)</sup>   | 3.59(2)    | C(21) | H(6) <sup>2)</sup>   | 3.31(3)    |
| C(21) | H(8) <sup>11)</sup>  | 3.34(3)    | C(21) | H(16) <sup>10)</sup> | 3.407      |
| C(22) | O(4) <sup>9)</sup>   | 3.547(3)   | C(22) | H(5) <sup>2)</sup>   | 3.55(2)    |

Table 5. Distances beyond the asymmetric unit out to 3.60 Å (continued)

| atom  | atom                 | distance  | atom  | atom                 | distance  |
|-------|----------------------|-----------|-------|----------------------|-----------|
| C(22) | H(11) <sup>3)</sup>  | 3.60(2)   | C(22) | H(14) <sup>9)</sup>  | 3.34(2)   |
| C(23) | C(16) <sup>9)</sup>  | 3.525(5)  | C(23) | H(10) <sup>11)</sup> | 3.242(16) |
| C(23) | H(12) <sup>9)</sup>  | 3.49(2)   | C(23) | H(16) <sup>12)</sup> | 3.103     |
| C(24) | O(1) <sup>9)</sup>   | 3.375(3)  | C(24) | O(3) <sup>3)</sup>   | 3.512(4)  |
| C(24) | C(15) <sup>3)</sup>  | 3.590(5)  | C(24) | C(26) <sup>9)</sup>  | 3.573(4)  |
| C(24) | H(11) <sup>3)</sup>  | 2.73(3)   | C(24) | H(14) <sup>9)</sup>  | 2.90(3)   |
| C(25) | O(5) <sup>10)</sup>  | 3.274(6)  | C(25) | H(6) <sup>13)</sup>  | 3.33(2)   |
| C(25) | H(7) <sup>13)</sup>  | 3.57(2)   | C(25) | H(16) <sup>10)</sup> | 3.319     |
| C(26) | O(1) <sup>5)</sup>   | 3.306(4)  | C(26) | C(24) <sup>2)</sup>  | 3.573(4)  |
| C(26) | H(1) <sup>14)</sup>  | 3.55(2)   | C(26) | H(3) <sup>2)</sup>   | 3.10(3)   |
| C(26) | H(15) <sup>5)</sup>  | 3.02(4)   | H(1)  | Cl(1) <sup>1)</sup>  | 3.57(2)   |
| H(1)  | O(5) <sup>2)</sup>   | 3.363(18) | H(1)  | C(16) <sup>2)</sup>  | 3.41(2)   |
| H(1)  | C(26) <sup>7)</sup>  | 3.55(2)   | H(1)  | H(12) <sup>2)</sup>  | 2.64(3)   |
| H(1)  | H(14) <sup>7)</sup>  | 2.94(4)   | H(1)  | H(15) <sup>7)</sup>  | 3.45(4)   |
| H(2)  | O(1) <sup>9)</sup>   | 3.41(2)   | H(2)  | O(4) <sup>9)</sup>   | 2.76(2)   |
| H(2)  | C(9) <sup>9)</sup>   | 3.36(2)   | H(2)  | C(10) <sup>9)</sup>  | 2.89(3)   |
| H(2)  | C(17) <sup>9)</sup>  | 3.03(2)   | H(2)  | H(13) <sup>9)</sup>  | 3.05(4)   |
| H(2)  | H(14) <sup>9)</sup>  | 3.45(3)   | H(3)  | O(1) <sup>9)</sup>   | 2.69(2)   |
| H(3)  | O(3) <sup>3)</sup>   | 2.66(4)   | H(3)  | N(1) <sup>3)</sup>   | 3.55(4)   |
| H(3)  | C(15) <sup>3)</sup>  | 3.38(3)   | H(3)  | C(17) <sup>9)</sup>  | 3.34(3)   |
| H(3)  | C(26) <sup>9)</sup>  | 3.10(3)   | H(3)  | H(11) <sup>3)</sup>  | 2.53(4)   |
| H(3)  | H(13) <sup>9)</sup>  | 3.44(4)   | H(3)  | H(14) <sup>9)</sup>  | 2.66(5)   |
| H(3)  | H(15) <sup>9)</sup>  | 3.16(3)   | H(4)  | O(4) <sup>9)</sup>   | 2.75(3)   |
| H(4)  | H(5) <sup>2)</sup>   | 3.54(3)   | H(4)  | H(10) <sup>11)</sup> | 3.57(3)   |
| H(5)  | C(12) <sup>9)</sup>  | 3.27(3)   | H(5)  | C(14) <sup>9)</sup>  | 3.17(3)   |
| H(5)  | C(16) <sup>9)</sup>  | 3.05(2)   | H(5)  | C(18) <sup>9)</sup>  | 3.56(3)   |
| H(5)  | C(21) <sup>9)</sup>  | 3.59(2)   | H(5)  | C(22) <sup>9)</sup>  | 3.55(2)   |
| H(5)  | H(4) <sup>9)</sup>   | 3.54(3)   | H(5)  | H(10) <sup>11)</sup> | 3.24(3)   |
| H(5)  | H(12) <sup>9)</sup>  | 3.07(3)   | H(6)  | O(5) <sup>9)</sup>   | 3.52(2)   |
| H(6)  | C(16) <sup>9)</sup>  | 3.38(3)   | H(6)  | C(21) <sup>9)</sup>  | 3.31(3)   |
| H(6)  | C(25) <sup>12)</sup> | 3.33(2)   | H(6)  | H(12) <sup>9)</sup>  | 3.49(3)   |
| H(6)  | H(14) <sup>9)</sup>  | 3.52(3)   | H(6)  | H(16) <sup>12)</sup> | 2.581     |
| H(6)  | H(17) <sup>12)</sup> | 3.291     | H(7)  | O(4) <sup>15)</sup>  | 3.43(2)   |
| H(7)  | C(9) <sup>11)</sup>  | 3.49(3)   | H(7)  | C(10) <sup>11)</sup> | 2.96(3)   |
| H(7)  | C(17) <sup>11)</sup> | 3.52(4)   | H(7)  | C(25) <sup>12)</sup> | 3.57(2)   |
| H(7)  | H(10) <sup>11)</sup> | 3.01(2)   | H(7)  | H(12) <sup>9)</sup>  | 3.60(4)   |
| H(7)  | H(13) <sup>11)</sup> | 2.73(4)   | H(7)  | H(16) <sup>12)</sup> | 2.956     |

Table 5. Distances beyond the asymmetric unit out to 3.60 Å (continued)

| atom  | atom                 | distance  | atom  | atom                 | distance  |
|-------|----------------------|-----------|-------|----------------------|-----------|
| H(7)  | H(17) <sup>12)</sup> | 3.329     | H(8)  | C(9) <sup>11)</sup>  | 3.28(2)   |
| H(8)  | C(10) <sup>11)</sup> | 3.18(2)   | H(8)  | C(14) <sup>11)</sup> | 3.46(2)   |
| H(8)  | C(16) <sup>11)</sup> | 3.47(3)   | H(8)  | C(17) <sup>11)</sup> | 3.21(2)   |
| H(8)  | C(21) <sup>11)</sup> | 3.34(3)   | H(8)  | H(10) <sup>11)</sup> | 3.16(2)   |
| H(8)  | H(13) <sup>11)</sup> | 3.56(3)   | H(8)  | H(17) <sup>12)</sup> | 3.365     |
| H(9)  | Cl(1) <sup>1)</sup>  | 3.108(18) | H(9)  | H(17) <sup>12)</sup> | 3.473     |
| H(10) | N(8) <sup>11)</sup>  | 2.559(16) | H(10) | C(14) <sup>11)</sup> | 3.34(2)   |
| H(10) | C(15) <sup>11)</sup> | 3.409(18) | H(10) | C(18) <sup>11)</sup> | 3.41(2)   |
| H(10) | C(19) <sup>11)</sup> | 3.213(16) | H(10) | C(23) <sup>11)</sup> | 3.242(16) |
| H(10) | H(4) <sup>11)</sup>  | 3.57(3)   | H(10) | H(5) <sup>11)</sup>  | 3.24(3)   |
| H(10) | H(7) <sup>11)</sup>  | 3.01(2)   | H(10) | H(8) <sup>11)</sup>  | 3.16(2)   |
| H(10) | H(10) <sup>11)</sup> | 2.86(2)   | H(11) | Cl(1) <sup>6)</sup>  | 3.04(3)   |
| H(11) | C(20) <sup>6)</sup>  | 2.92(3)   | H(11) | C(22) <sup>6)</sup>  | 3.60(2)   |
| H(11) | C(24) <sup>6)</sup>  | 2.73(3)   | H(11) | H(3) <sup>6)</sup>   | 2.53(4)   |
| H(12) | S(1) <sup>9)</sup>   | 3.59(3)   | H(12) | O(4) <sup>9)</sup>   | 2.77(3)   |
| H(12) | C(11) <sup>9)</sup>  | 2.86(2)   | H(12) | C(13) <sup>9)</sup>  | 3.37(2)   |
| H(12) | C(20) <sup>9)</sup>  | 3.49(2)   | H(12) | C(23) <sup>2)</sup>  | 3.49(2)   |
| H(12) | H(1) <sup>9)</sup>   | 2.64(3)   | H(12) | H(5) <sup>2)</sup>   | 3.07(3)   |
| H(12) | H(6) <sup>2)</sup>   | 3.49(3)   | H(12) | H(7) <sup>2)</sup>   | 3.60(4)   |
| H(12) | H(16) <sup>10)</sup> | 3.534     | H(13) | S(1) <sup>4)</sup>   | 3.47(2)   |
| H(13) | O(3) <sup>4)</sup>   | 3.44(2)   | H(13) | O(4) <sup>4)</sup>   | 2.87(2)   |
| H(13) | H(2) <sup>2)</sup>   | 3.05(4)   | H(13) | H(3) <sup>2)</sup>   | 3.44(4)   |
| H(13) | H(7) <sup>11)</sup>  | 2.73(4)   | H(13) | H(8) <sup>11)</sup>  | 3.56(3)   |
| H(14) | O(5) <sup>10)</sup>  | 3.33(4)   | H(14) | C(20) <sup>2)</sup>  | 3.56(2)   |
| H(14) | C(22) <sup>2)</sup>  | 3.34(2)   | H(14) | C(24) <sup>2)</sup>  | 2.90(3)   |
| H(14) | H(1) <sup>14)</sup>  | 2.94(4)   | H(14) | H(2) <sup>2)</sup>   | 3.45(3)   |
| H(14) | H(3) <sup>2)</sup>   | 2.66(5)   | H(14) | H(6) <sup>2)</sup>   | 3.52(3)   |
| H(14) | H(16) <sup>10)</sup> | 3.433     | H(15) | O(1) <sup>5)</sup>   | 2.52(3)   |
| H(15) | O(3) <sup>14)</sup>  | 2.98(2)   | H(15) | C(26) <sup>5)</sup>  | 3.02(4)   |
| H(15) | H(1) <sup>14)</sup>  | 3.45(4)   | H(15) | H(3) <sup>2)</sup>   | 3.16(3)   |
| H(15) | H(15) <sup>5)</sup>  | 2.37(6)   | H(15) | H(17) <sup>5)</sup>  | 3.501     |
| H(16) | O(5) <sup>10)</sup>  | 2.570     | H(16) | C(21) <sup>10)</sup> | 3.407     |
| H(16) | C(23) <sup>13)</sup> | 3.103     | H(16) | C(25) <sup>10)</sup> | 3.319     |
| H(16) | H(6) <sup>13)</sup>  | 2.581     | H(16) | H(7) <sup>13)</sup>  | 2.956     |
| H(16) | H(12) <sup>10)</sup> | 3.534     | H(16) | H(14) <sup>10)</sup> | 3.433     |
| H(16) | H(16) <sup>10)</sup> | 3.102     | H(17) | O(1) <sup>5)</sup>   | 3.279     |
| H(17) | H(6) <sup>13)</sup>  | 3.291     | H(17) | H(7) <sup>13)</sup>  | 3.329     |

Table 5. Distances beyond the asymmetric unit out to 3.60 Å (continued)

| atom  | atom                | distance | atom  | atom                | distance |
|-------|---------------------|----------|-------|---------------------|----------|
| H(17) | H(8) <sup>13)</sup> | 3.365    | H(17) | H(9) <sup>13)</sup> | 3.473    |
| H(17) | H(15) <sup>5)</sup> | 3.501    | H(17) | H(17) <sup>5)</sup> | 2.950    |

Symmetry Operators:

- |                             |                               |
|-----------------------------|-------------------------------|
| (1) -X+2,-Y,-Z+1            | (2) -X+1/2+1,Y+1/2-1,-Z+1/2   |
| (3) X,-Y,Z+1/2              | (4) -X+1/2+1,-Y+1/2-1,-Z      |
| (5) -X+1,Y,-Z+1/2-1         | (6) X,-Y,Z+1/2-1              |
| (7) X+1/2,-Y+1/2-1,Z+1/2    | (8) X,Y-1,Z                   |
| (9) -X+1/2+1,Y+1/2,-Z+1/2   | (10) -X+1,-Y,-Z               |
| (11) -X+1/2+1,-Y+1/2,-Z     | (12) X+1/2,-Y+1/2,Z+1/2       |
| (13) X+1/2-1,-Y+1/2,Z+1/2-1 | (14) X+1/2-1,-Y+1/2-1,Z+1/2-1 |
| (15) X,Y+1,Z                |                               |
