# Supplementary material for: Synthesis of new tetra- and pentacyclic, methylenedioxy- and ethylenedioxy-substituted derivatives of the dibenzo[ c , f ][1,2]thiazepine ring system
Source: publisher site journal article supplement (doi:10.3762/bjoc.21.205), 2025-12-09
Supplement: Additional file 2 [file compound 27 structure report.pdf › compound 27 structure report.pdf]

**144830**

**2182-BGE**

Submitted by: Berecz Gabor  
Operator: Dancso Andras

X-ray Structure Report

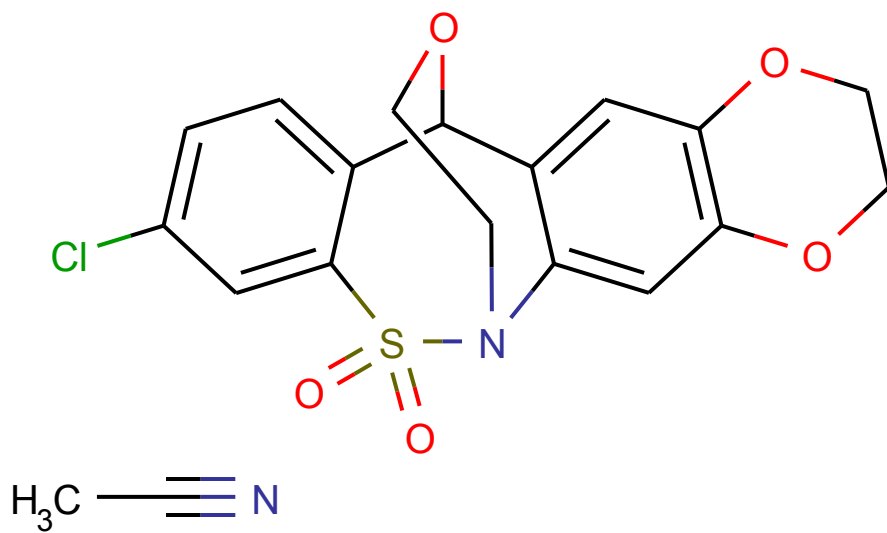

July 14, 2025

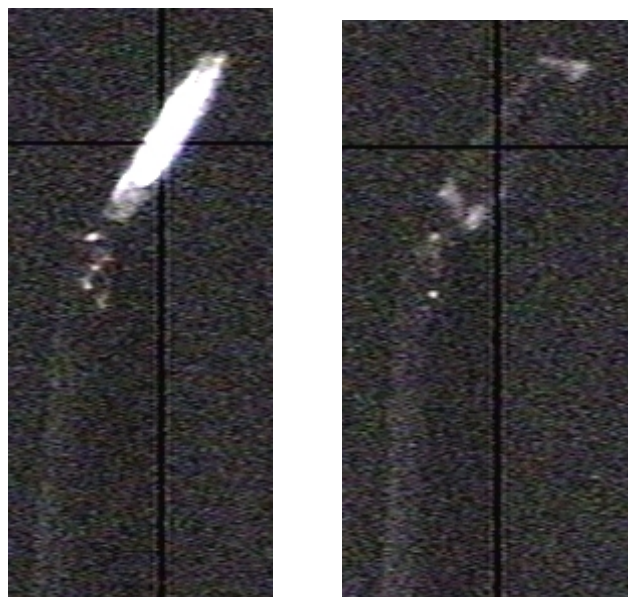

Fig. 1. The crystal

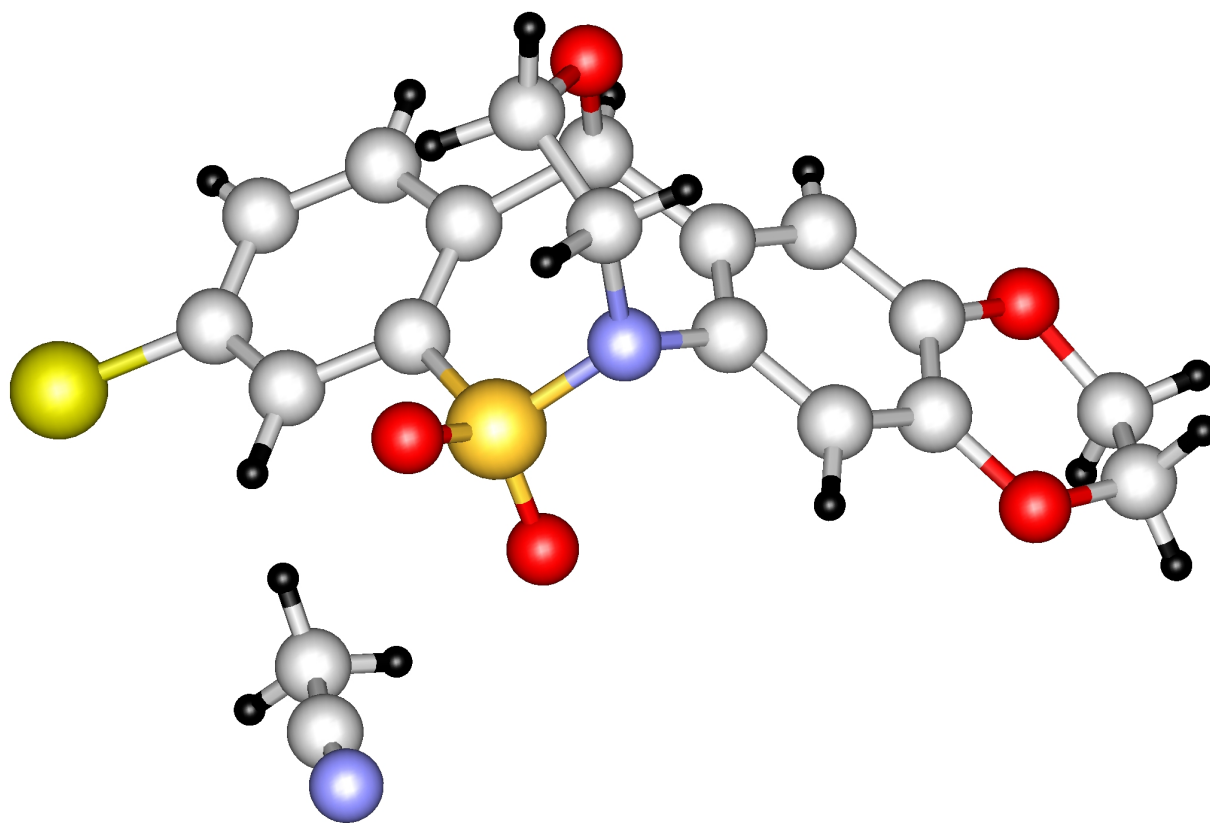

Fig. 2. The molecule (some hydrogens were generated by the software)

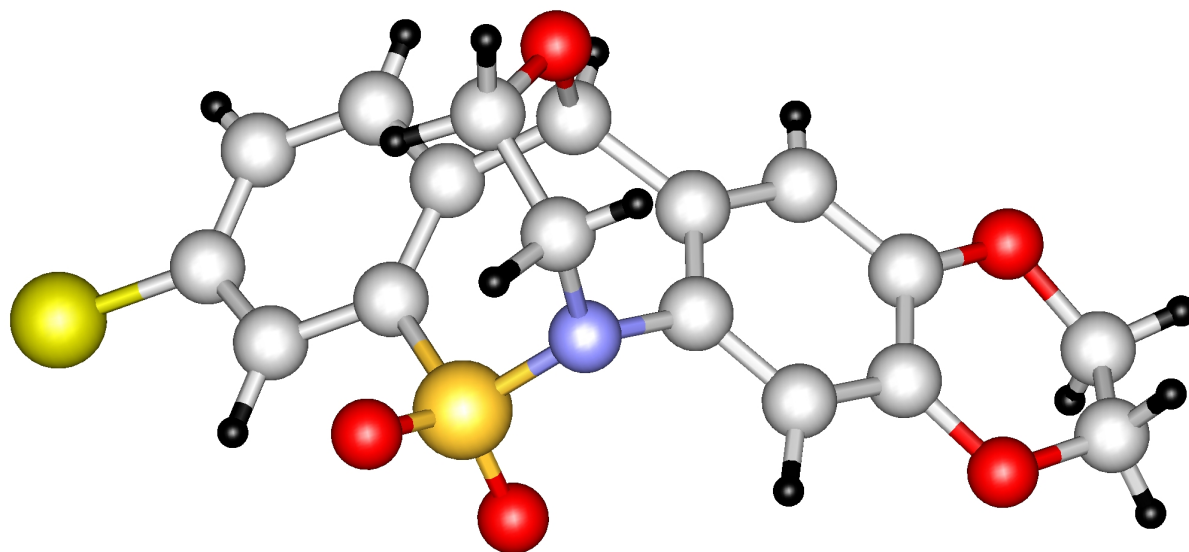

Fig. 3. Fragment 1

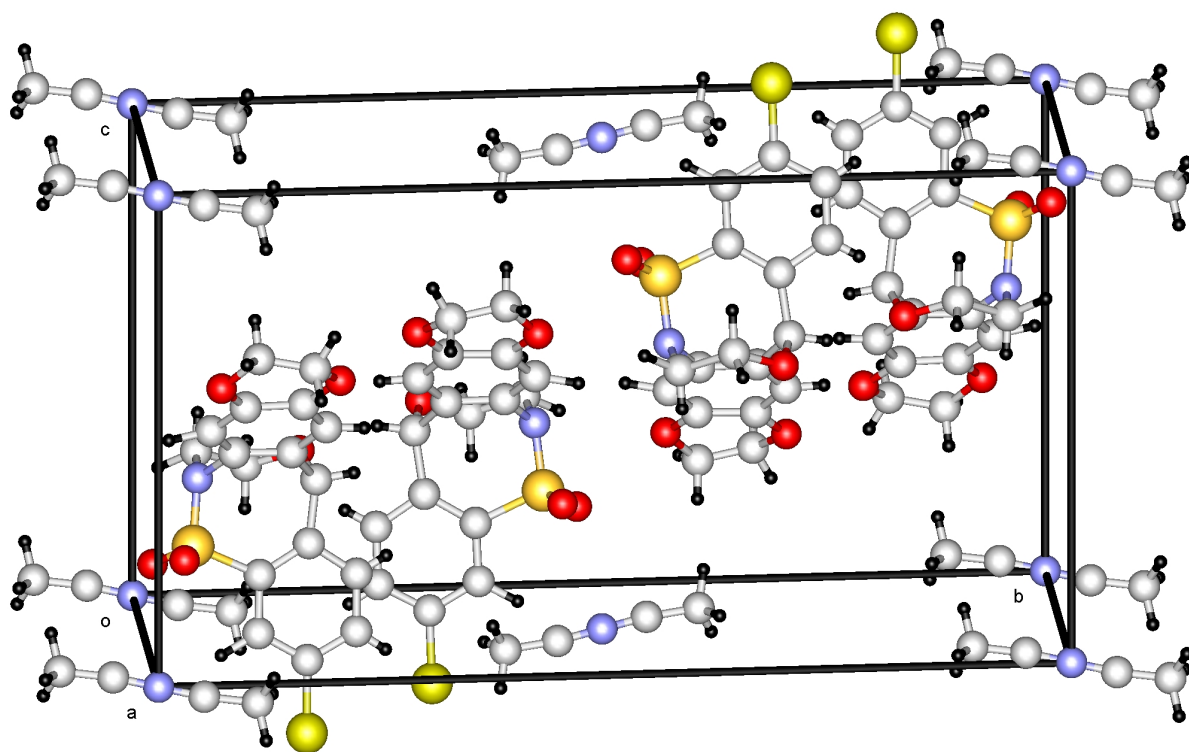

Fig. 4. Packing

## *Experimental*

### Data Collection

A colorless prism crystal of  $C_{19}H_{17}ClN_2O_5S$  having approximate dimensions of 0.29 x 0.09 x 0.05 mm was mounted on a cactus needle. All measurements were made on a Rigaku RAXIS RAPID imaging plate area detector with graphite monochromated Cu-K $\alpha$  radiation.

Indexing was performed from 4 oscillations that were exposed for 900 seconds. The crystal-to-detector distance was 127.40 mm.

Cell constants and an orientation matrix for data collection corresponded to a primitive monoclinic cell with dimensions:

$$\begin{aligned}a &= 6.6806(5) \text{ \AA} \\b &= 21.7251(14) \text{ \AA} \quad \beta = 92.707(4)^\circ \\c &= 12.1261(8) \text{ \AA} \\V &= 1758.0(2) \text{ \AA}^3\end{aligned}$$

For  $Z = 4$  and F.W. = 420.87, the calculated density is 1.590 g/cm<sup>3</sup>. The systematic absences of:

$$\begin{aligned}h0l: h \pm 2n \\0k0: k \pm 2n\end{aligned}$$

uniquely determine the space group to be:

$$P2_1/a \text{ (\#14)}$$

The data were collected at a temperature of  $20 \pm 1^\circ\text{C}$  to a maximum  $2\theta$  value of  $143.4^\circ$ . A total of 180 oscillation images were collected. A sweep of data was done using  $\omega$  scans from  $20.0$  to  $200.0^\circ$  in  $5.0^\circ$  step, at  $\chi=0.0^\circ$  and  $\phi = 0.0^\circ$ . The exposure rate was 180.0 [sec./ $^\circ$ ]. A second sweep was performed using  $\omega$  scans from  $20.0$  to  $200.0^\circ$  in  $5.0^\circ$  step, at  $\chi=54.0^\circ$  and  $\phi = 0.0^\circ$ . The exposure rate was 180.0 [sec./ $^\circ$ ]. Another sweep was performed using  $\omega$  scans from  $20.0$  to  $200.0^\circ$  in  $5.0^\circ$  step, at  $\chi=54.0^\circ$  and  $\phi = 90.0^\circ$ . The exposure rate was 180.0 [sec./ $^\circ$ ]. Another sweep was performed using  $\omega$  scans from  $20.0$  to  $200.0^\circ$  in  $5.0^\circ$  step, at  $\chi=54.0^\circ$  and  $\phi = 180.0^\circ$ . The exposure rate was 180.0 [sec./ $^\circ$ ]. Another sweep was performed using  $\omega$  scans from  $20.0$  to  $200.0^\circ$  in  $5.0^\circ$  step, at  $\chi=54.0^\circ$  and  $\phi = 270.0^\circ$ . The exposure rate was 180.0 [sec./ $^\circ$ ]. The crystal-to-detector distance was 127.40 mm. Readout was performed in the 0.100 mm pixel mode.

## Data Reduction

Of the 20287 reflections that were collected, 3324 were unique ( $R_{\text{int}} = 0.055$ ).

The linear absorption coefficient,  $\mu$ , for Cu-K $\alpha$  radiation is 33.675 cm<sup>-1</sup>. An empirical absorption correction was applied which resulted in transmission factors ranging from 0.549 to 0.845. The data were corrected for Lorentz and polarization effects.

## Structure Solution and Refinement

The structure was solved by direct methods<sup>1</sup> and expanded using Fourier techniques<sup>2</sup>. Some non-hydrogen atoms were refined anisotropically, while the rest were refined isotropically. Some hydrogen atoms were refined isotropically and the rest were refined using the riding model. The final cycle of full-matrix least-squares refinement<sup>3</sup> on  $F$  was based on 13358 observed reflections ( $I > 2.00\sigma(I)$ ) and 279 variable parameters and converged (largest parameter shift was 0.00 times its esd) with unweighted and weighted agreement factors of:

$$R = \sum ||F_o| - |F_c|| / \sum |F_o| = 0.0742$$

$$R_w = [ \sum w (|F_o| - |F_c|)^2 / \sum w F_o^2 ]^{1/2} = 0.0835$$

The standard deviation of an observation of unit weight<sup>4</sup> was 4.76. Unit weights were used. Plots of  $\sum w (|F_o| - |F_c|)^2$  versus  $|F_o|$ , reflection order in data collection,  $\sin \theta/\lambda$  and various classes of indices showed no unusual trends. The maximum and minimum peaks on the final difference Fourier map corresponded to 6.13 and -7.57 e<sup>-</sup>/Å<sup>3</sup>, respectively.

Neutral atom scattering factors were taken from Cromer and Waber<sup>5</sup>. Anomalous dispersion effects were included in  $F_{\text{calc}}$ <sup>6</sup>; the values for  $\Delta f'$  and  $\Delta f''$  were those of Creagh and McAuley<sup>7</sup>. The values for the mass attenuation coefficients are those of Creagh and Hubbell<sup>8</sup>. All calculations were performed using the CrystalStructure<sup>9,10</sup> crystallographic software package.

## *References*

- (1) SIR92: Altomare, A., Cascarano, G., Giacovazzo, C., Guagliardi, A., Burla, M., Polidori, G., and Camalli, M. (1994) J. Appl. Cryst., 27, 435.
- (2) DIRDIF99: Beurskens, P.T., Admiraal, G., Beurskens, G., Bosman, W.P., de Gelder, R., Israel, R. and Smits, J.M.M. (1999). The DIRDIF-99 program system, Technical Report of the Crystallography Laboratory, University of Nijmegen, The Netherlands.

(3) Least Squares function minimized:

$$\sum w(|F_o| - |F_c|)^2 \quad \text{where } w = \text{Least Squares weights.}$$

(4) Standard deviation of an observation of unit weight:

$$[\sum w(|F_o| - |F_c|)^2 / (N_o - N_v)]^{1/2}$$

where:  $N_o$  = number of observations

$N_v$  = number of variables

(5) Cromer, D. T. & Waber, J. T.; "International Tables for X-ray Crystallography", Vol. IV, The Kynoch Press, Birmingham, England, Table 2.2 A (1974).

(6) Ibers, J. A. & Hamilton, W. C.; Acta Crystallogr., 17, 781 (1964).

(7) Creagh, D. C. & McAuley, W.J. .; "International Tables for Crystallography", Vol C, (A.J.C. Wilson, ed.), Kluwer Academic Publishers, Boston, Table 4.2.6.8, pages 219-222 (1992).

(8) Creagh, D. C. & Hubbell, J.H.; "International Tables for Crystallography", Vol C, (A.J.C. Wilson, ed.), Kluwer Academic Publishers, Boston, Table 4.2.4.3, pages 200-206 (1992).

(9) CrystalStructure 3.7.0: Crystal Structure Analysis Package, Rigaku and Rigaku/MSK (2000-2005). 9009 New Trails Dr. The Woodlands TX 77381 USA.

(10) CRYSTALS Issue 10: Watkin, D.J., Prout, C.K. Carruthers, J.R. & Betteridge, P.W. Chemical Crystallography Laboratory, Oxford, UK. (1996)



## EXPERIMENTAL DETAILS

### A. Crystal Data

|                         |                                                                                                                                                            |
|-------------------------|------------------------------------------------------------------------------------------------------------------------------------------------------------|
| Empirical Formula       | $\text{C}_{19}\text{H}_{17}\text{ClN}_2\text{O}_5\text{S}$                                                                                                 |
| Formula Weight          | 420.87                                                                                                                                                     |
| Crystal Color, Habit    | colorless, prism                                                                                                                                           |
| Crystal Dimensions      | 0.29 X 0.09 X 0.05 mm                                                                                                                                      |
| Crystal System          | monoclinic                                                                                                                                                 |
| Lattice Type            | Primitive                                                                                                                                                  |
| Indexing Images         | 4 oscillations @ 900.0 seconds                                                                                                                             |
| Detector Position       | 127.40 mm                                                                                                                                                  |
| Pixel Size              | 0.100 mm                                                                                                                                                   |
| Lattice Parameters      | $a = 6.6806(5) \text{ \AA}$<br>$b = 21.7251(14) \text{ \AA}$<br>$c = 12.1261(8) \text{ \AA}$<br>$\beta = 92.707(4)^\circ$<br>$V = 1758.0(2) \text{ \AA}^3$ |
| Space Group             | $P2_1/a$ (#14)                                                                                                                                             |
| Z value                 | 4                                                                                                                                                          |
| D <sub>calc</sub>       | 1.590 g/cm <sup>3</sup>                                                                                                                                    |
| F <sub>000</sub>        | 872.00                                                                                                                                                     |
| $\mu(\text{CuK}\alpha)$ | 33.675 cm <sup>-1</sup>                                                                                                                                    |

## B. Intensity Measurements

|                                                           |                                                                       |
|-----------------------------------------------------------|-----------------------------------------------------------------------|
| Diffractometer                                            | Rigaku RAXIS-RAPID                                                    |
| Radiation                                                 | CuK $\alpha$ ( $\lambda$ = 1.54187 Å)<br>graphite monochromated       |
| Detector Aperture                                         | 280 mm x 256 mm                                                       |
| Data Images                                               | 180 exposures                                                         |
| $\omega$ oscillation Range ( $\chi$ =0.0, $\phi$ =0.0)    | 20.0 - 200.0°                                                         |
| Exposure Rate                                             | 180.0 sec./°                                                          |
| $\omega$ oscillation Range ( $\chi$ =54.0, $\phi$ =0.0)   | 20.0 - 200.0°                                                         |
| Exposure Rate                                             | 180.0 sec./°                                                          |
| $\omega$ oscillation Range ( $\chi$ =54.0, $\phi$ =90.0)  | 20.0 - 200.0°                                                         |
| Exposure Rate                                             | 180.0 sec./°                                                          |
| $\omega$ oscillation Range ( $\chi$ =54.0, $\phi$ =180.0) | 20.0 - 200.0°                                                         |
| Exposure Rate                                             | 180.0 sec./°                                                          |
| $\omega$ oscillation Range ( $\chi$ =54.0, $\phi$ =270.0) | 20.0 - 200.0°                                                         |
| Exposure Rate                                             | 180.0 sec./°                                                          |
| Detector Position                                         | 127.40 mm                                                             |
| Pixel Size                                                | 0.100 mm                                                              |
| $2\theta_{\text{max}}$                                    | 143.4°                                                                |
| No. of Reflections Measured                               | Total: 20287<br>Unique: 3324 ( $R_{\text{int}}$ = 0.055)              |
| Corrections                                               | Lorentz-polarization<br>Absorption<br>(trans. factors: 0.549 - 0.845) |

### C. Structure Solution and Refinement

|                                          |                                |
|------------------------------------------|--------------------------------|
| Structure Solution                       | Direct Methods (SIR92)         |
| Refinement                               | Full-matrix least-squares on F |
| Function Minimized                       | $\Sigma w ( Fo  -  Fc )^2$     |
| Least Squares Weights                    | 1                              |
| $2\theta_{\text{max}}$ cutoff            | 143.4 $^{\circ}$               |
| Anomalous Dispersion                     | All non-hydrogen atoms         |
| No. Observations ( $I > 2.00\sigma(I)$ ) | 13358                          |
| No. Variables                            | 279                            |
| Reflection/Parameter Ratio               | 47.88                          |
| Residuals: R ( $I > 2.00\sigma(I)$ )     | 0.0742                         |
| Residuals: Rw ( $I > 2.00\sigma(I)$ )    | 0.0835                         |
| Goodness of Fit Indicator                | 4.762                          |
| Max Shift/Error in Final Cycle           | 0.000                          |
| Maximum peak in Final Diff. Map          | 6.13 e $^{-}/\text{\AA}^3$     |
| Minimum peak in Final Diff. Map          | -7.57 e $^{-}/\text{\AA}^3$    |

Table 1. Atomic coordinates and B<sub>iso</sub>/B<sub>eq</sub> and occupancy

| atom  | x           | y           | z           | B <sub>eq</sub> | occ |
|-------|-------------|-------------|-------------|-----------------|-----|
| Cl(2) | 0.58395(18) | 0.17430(6)  | -0.17994(9) | 6.25(3)         | 1/2 |
| S(1)  | 0.53619(16) | 0.05103(4)  | 0.19781(8)  | 3.03(2)         |     |
| O(3)  | 0.2212(3)   | 0.17672(10) | 0.32766(18) | 2.87(6)         |     |
| O(4)  | 0.9481(3)   | 0.20065(11) | 0.60382(19) | 3.82(6)         |     |
| O(5)  | 0.4027(3)   | 0.01039(10) | 0.13787(19) | 4.20(7)         |     |
| O(6)  | 0.7437(3)   | 0.03576(10) | 0.20798(19) | 3.62(6)         |     |
| O(7)  | 0.9868(3)   | 0.06944(10) | 0.6014(2)   | 4.24(7)         |     |
| N(1)  | 0.4562(4)   | 0.05808(11) | 0.3205(2)   | 2.64(7)         |     |
| N(2)  | 1.0000      | 0.0000      | 0.0000      | 8.9(3)          |     |
| C(1)  | 0.6941(5)   | 0.19254(16) | 0.4621(2)   | 2.75(9)         |     |
| C(2)  | 1.0444(11)  | 0.1070(3)   | -0.0289(6)  | 17.080          |     |
| C(9)  | 0.4761(4)   | 0.17966(16) | 0.1860(2)   | 2.35(8)         |     |
| C(11) | 0.5858(5)   | 0.09478(16) | 0.3948(2)   | 2.60(8)         |     |
| C(12) | 0.5730(4)   | 0.15806(14) | 0.3902(2)   | 2.31(8)         |     |
| C(13) | 0.8308(5)   | 0.16370(16) | 0.5354(2)   | 2.88(9)         |     |
| C(14) | 0.8462(5)   | 0.09983(16) | 0.5355(2)   | 3.00(9)         |     |
| C(15) | 0.5179(4)   | 0.12456(14) | 0.1320(2)   | 2.52(8)         |     |
| C(16) | 0.7224(5)   | 0.06522(17) | 0.4656(3)   | 3.06(9)         |     |
| C(17) | 0.5491(5)   | 0.1222(2)   | 0.0193(3)   | 3.33(10)        |     |
| C(18) | 0.4292(5)   | 0.18907(14) | 0.3066(3)   | 2.66(9)         |     |
| C(19) | 0.1402(5)   | 0.12031(18) | 0.2843(3)   | 3.00(10)        |     |
| C(20) | 0.4683(5)   | 0.23208(19) | 0.1200(3)   | 3.02(10)        |     |
| C(21) | 0.2364(6)   | 0.06293(19) | 0.3343(3)   | 3.36(11)        |     |
| C(22) | 0.5015(5)   | 0.2309(2)   | 0.0093(3)   | 3.65(11)        |     |
| C(23) | 0.5415(5)   | 0.1759(2)   | -0.0394(2)  | 3.73(10)        |     |
| C(25) | 1.1064(7)   | 0.1684(2)   | 0.6594(4)   | 8.32(16)        |     |
| C(26) | 1.0898(8)   | 0.1076(2)   | 0.6786(4)   | 10.08(19)       |     |
| C(28) | 1.0203(12)  | 0.0493(3)   | -0.0183(6)  | 16.867          |     |
| H(1)  | 0.437(4)    | 0.2654(12)  | 0.150(2)    | 1.8(8)          |     |
| H(2)  | 0.498(4)    | 0.2628(12)  | -0.030(2)   | 1.8(7)          |     |
| H(3)  | 0.582(3)    | 0.0804(11)  | -0.018(2)   | 1.7(6)          |     |
| H(4)  | 0.439(3)    | 0.2300(10)  | 0.3199(19)  | 0.6(5)          |     |
| H(5)  | 0.687(3)    | 0.2343(11)  | 0.457(2)    | 1.7(6)          |     |
| H(6)  | 0.751(4)    | 0.0185(13)  | 0.454(2)    | 3.8(8)          |     |
| H(7)  | -0.004(4)   | 0.1256(11)  | 0.307(2)    | 1.8(6)          |     |
| H(8)  | 0.152(3)    | 0.1186(10)  | 0.200(2)    | 1.2(6)          |     |
| H(9)  | 0.172(4)    | 0.0230(13)  | 0.291(2)    | 4.0(8)          |     |

Table 1. Atomic coordinates and  $B_{\text{iso}}/B_{\text{eq}}$  and occupancy (continued)

| atom  | x        | y          | z        | $B_{\text{eq}}$ | occ |
|-------|----------|------------|----------|-----------------|-----|
| H(10) | 0.215(4) | 0.0654(12) | 0.409(2) | 2.3(8)          |     |
| H(11) | 1.2184   | 0.1719     | 0.6143   | 9.70            |     |
| H(12) | 1.1345   | 0.1890     | 0.7274   | 9.68            |     |
| H(13) | 1.0178   | 0.1051     | 0.7441   | 11.73           |     |
| H(14) | 1.2199   | 0.0907     | 0.6917   | 11.71           |     |
| H(15) | 0.9174   | 0.1267     | -0.0358  | 20.56           |     |
| H(16) | 1.1161   | 0.1145     | -0.0934  | 20.55           |     |
| H(17) | 1.1180   | 0.1230     | 0.0337   | 20.56           |     |

$$B_{\text{eq}} = 8/3 \pi^2 (U_{11}(aa^*)^2 + U_{22}(bb^*)^2 + U_{33}(cc^*)^2 + 2U_{12}(aa^*bb^*)\cos \gamma + 2U_{13}(aa^*cc^*)\cos \beta + 2U_{23}(bb^*cc^*)\cos \alpha)$$

Table 2. Anisotropic displacement parameters

| atom  | U <sub>11</sub> | U <sub>22</sub> | U <sub>33</sub> | U <sub>12</sub> | U <sub>13</sub> | U <sub>23</sub> |
|-------|-----------------|-----------------|-----------------|-----------------|-----------------|-----------------|
| Cl(2) | 0.0789(9)       | 0.1193(10)      | 0.0395(6)       | 0.0085(7)       | 0.0072(6)       | 0.0142(6)       |
| S(1)  | 0.0428(6)       | 0.0306(5)       | 0.0415(5)       | 0.0031(5)       | -0.0007(5)      | -0.0046(4)      |
| O(3)  | 0.0300(15)      | 0.0319(14)      | 0.0473(16)      | 0.0024(11)      | 0.0038(12)      | -0.0039(11)     |
| O(4)  | 0.0522(19)      | 0.0420(15)      | 0.0489(17)      | -0.0075(13)     | -0.0173(15)     | -0.0038(13)     |
| O(5)  | 0.067(2)        | 0.0372(16)      | 0.0543(17)      | -0.0072(13)     | -0.0037(15)     | -0.0108(12)     |
| O(6)  | 0.0370(16)      | 0.0477(16)      | 0.0529(17)      | 0.0165(12)      | 0.0036(13)      | -0.0012(12)     |
| O(7)  | 0.0594(19)      | 0.0406(16)      | 0.0583(18)      | 0.0031(14)      | -0.0248(16)     | 0.0085(13)      |
| N(1)  | 0.0339(19)      | 0.0256(16)      | 0.0408(19)      | -0.0009(14)     | 0.0024(16)      | -0.0027(13)     |
| C(1)  | 0.042(2)        | 0.023(2)        | 0.041(2)        | -0.0027(18)     | 0.007(2)        | -0.0017(18)     |
| C(9)  | 0.017(2)        | 0.040(2)        | 0.032(2)        | -0.0024(16)     | -0.0016(17)     | 0.0045(17)      |
| C(11) | 0.032(2)        | 0.029(2)        | 0.038(2)        | -0.0017(17)     | -0.0008(19)     | -0.0008(16)     |
| C(12) | 0.027(2)        | 0.027(2)        | 0.034(2)        | 0.0010(16)      | 0.0087(18)      | 0.0011(16)      |
| C(13) | 0.038(2)        | 0.037(2)        | 0.034(2)        | -0.0016(19)     | -0.0006(19)     | -0.0030(17)     |
| C(14) | 0.043(2)        | 0.035(2)        | 0.035(2)        | 0.0003(19)      | -0.001(2)       | 0.0083(18)      |
| C(15) | 0.022(2)        | 0.035(2)        | 0.039(2)        | 0.0005(17)      | -0.0035(18)     | 0.0022(17)      |
| C(16) | 0.041(2)        | 0.028(2)        | 0.047(2)        | 0.0011(18)      | -0.000(2)       | 0.0027(18)      |
| C(17) | 0.038(2)        | 0.054(2)        | 0.034(2)        | 0.008(2)        | 0.004(2)        | -0.003(2)       |
| C(18) | 0.033(2)        | 0.022(2)        | 0.046(2)        | -0.0029(17)     | -0.000(2)       | -0.0015(18)     |
| C(19) | 0.023(2)        | 0.045(2)        | 0.046(2)        | -0.0065(19)     | 0.007(2)        | -0.000(2)       |
| C(20) | 0.028(2)        | 0.038(2)        | 0.048(2)        | 0.003(2)        | 0.002(2)        | 0.001(2)        |
| C(21) | 0.044(2)        | 0.039(2)        | 0.044(2)        | -0.009(2)       | 0.006(2)        | -0.000(2)       |
| C(22) | 0.033(2)        | 0.057(3)        | 0.048(3)        | -0.001(2)       | -0.005(2)       | 0.026(2)        |
| C(23) | 0.033(2)        | 0.077(3)        | 0.032(2)        | -0.003(2)       | 0.003(2)        | 0.002(2)        |
| C(25) | 0.102(4)        | 0.056(3)        | 0.148(5)        | -0.004(3)       | -0.093(3)       | 0.008(3)        |
| C(26) | 0.172(5)        | 0.061(3)        | 0.138(5)        | 0.008(3)        | -0.123(4)       | 0.002(3)        |

The general temperature factor expression:  $\exp(-2\pi^2(a^2U_{11}h^2 + b^2U_{22}k^2 + c^2U_{33}l^2 + 2a*b*U_{12}hk + 2a*c*U_{13}hl + 2b*c*U_{23}kl))$

Table 3. Bond lengths (Å)

| atom  | atom  | distance  | atom  | atom  | distance |
|-------|-------|-----------|-------|-------|----------|
| Cl(2) | C(23) | 1.741(3)  | S(1)  | O(5)  | 1.429(2) |
| S(1)  | O(6)  | 1.425(2)  | S(1)  | N(1)  | 1.612(2) |
| S(1)  | C(15) | 1.787(3)  | O(3)  | C(18) | 1.450(4) |
| O(3)  | C(19) | 1.430(4)  | O(4)  | C(13) | 1.373(4) |
| O(4)  | C(25) | 1.413(5)  | O(7)  | C(14) | 1.373(4) |
| O(7)  | C(26) | 1.405(5)  | N(1)  | C(11) | 1.457(4) |
| N(1)  | C(21) | 1.489(5)  | N(2)  | C(28) | 1.104(8) |
| N(2)  | C(28) | 1.104(8)  | C(1)  | C(12) | 1.382(4) |
| C(1)  | C(13) | 1.393(4)  | C(1)  | H(5)  | 0.91(2)  |
| C(2)  | C(28) | 1.271(10) | C(2)  | H(15) | 0.950    |
| C(2)  | H(16) | 0.950     | C(2)  | H(17) | 0.950    |
| C(9)  | C(15) | 1.399(4)  | C(9)  | C(18) | 1.523(5) |
| C(9)  | C(20) | 1.391(5)  | C(11) | C(12) | 1.378(4) |
| C(11) | C(16) | 1.381(4)  | C(12) | C(18) | 1.521(4) |
| C(13) | C(14) | 1.391(4)  | C(14) | C(16) | 1.379(5) |
| C(15) | C(17) | 1.394(5)  | C(16) | H(6)  | 1.04(2)  |
| C(17) | C(23) | 1.367(6)  | C(17) | H(3)  | 1.04(2)  |
| C(18) | H(4)  | 0.91(2)   | C(19) | C(21) | 1.516(5) |
| C(19) | H(7)  | 1.02(2)   | C(19) | H(8)  | 1.04(2)  |
| C(20) | C(22) | 1.372(6)  | C(20) | H(1)  | 0.84(2)  |
| C(21) | H(9)  | 1.09(2)   | C(21) | H(10) | 0.92(2)  |
| C(22) | C(23) | 1.364(6)  | C(22) | H(2)  | 0.84(2)  |
| C(25) | C(26) | 1.347(6)  | C(25) | H(11) | 0.950    |
| C(25) | H(12) | 0.950     | C(26) | H(13) | 0.950    |
| C(26) | H(14) | 0.950     |       |       |          |

Symmetry Operators:

(1) -X+2,-Y,-Z

Table 4. Bond angles (°)

| atom  | atom  | atom                | angle      | atom  | atom  | atom  | angle      |
|-------|-------|---------------------|------------|-------|-------|-------|------------|
| O(5)  | S(1)  | O(6)                | 118.78(14) | O(5)  | S(1)  | N(1)  | 107.57(15) |
| O(5)  | S(1)  | C(15)               | 107.30(14) | O(6)  | S(1)  | N(1)  | 107.81(14) |
| O(6)  | S(1)  | C(15)               | 107.01(14) | N(1)  | S(1)  | C(15) | 107.96(14) |
| C(18) | O(3)  | C(19)               | 116.3(2)   | C(13) | O(4)  | C(25) | 113.0(2)   |
| C(14) | O(7)  | C(26)               | 113.8(2)   | S(1)  | N(1)  | C(11) | 114.1(2)   |
| S(1)  | N(1)  | C(21)               | 118.8(2)   | C(11) | N(1)  | C(21) | 116.9(2)   |
| C(28) | N(2)  | C(28) <sup>1)</sup> | 0(440)     | C(12) | C(1)  | C(13) | 120.4(3)   |
| C(12) | C(1)  | H(5)                | 118.0(16)  | C(13) | C(1)  | H(5)  | 121.5(16)  |
| C(28) | C(2)  | H(15)               | 109.5      | C(28) | C(2)  | H(16) | 108.8      |
| C(28) | C(2)  | H(17)               | 110.1      | H(15) | C(2)  | H(16) | 109.5      |
| H(15) | C(2)  | H(17)               | 109.5      | H(16) | C(2)  | H(17) | 109.5      |
| C(15) | C(9)  | C(18)               | 128.2(3)   | C(15) | C(9)  | C(20) | 115.8(3)   |
| C(18) | C(9)  | C(20)               | 116.0(3)   | N(1)  | C(11) | C(12) | 119.1(2)   |
| N(1)  | C(11) | C(16)               | 119.1(3)   | C(12) | C(11) | C(16) | 121.8(3)   |
| C(1)  | C(12) | C(11)               | 118.8(3)   | C(1)  | C(12) | C(18) | 120.9(2)   |
| C(11) | C(12) | C(18)               | 120.4(2)   | O(4)  | C(13) | C(1)  | 117.5(3)   |
| O(4)  | C(13) | C(14)               | 122.8(3)   | C(1)  | C(13) | C(14) | 119.7(3)   |
| O(7)  | C(14) | C(13)               | 121.9(3)   | O(7)  | C(14) | C(16) | 118.0(3)   |
| C(13) | C(14) | C(16)               | 120.0(3)   | S(1)  | C(15) | C(9)  | 124.6(2)   |
| S(1)  | C(15) | C(17)               | 113.2(2)   | C(9)  | C(15) | C(17) | 122.2(3)   |
| C(11) | C(16) | C(14)               | 119.2(3)   | C(11) | C(16) | H(6)  | 119.2(15)  |
| C(14) | C(16) | H(6)                | 120.3(15)  | C(15) | C(17) | C(23) | 118.4(3)   |
| C(15) | C(17) | H(3)                | 120.0(14)  | C(23) | C(17) | H(3)  | 121.6(14)  |
| O(3)  | C(18) | C(9)                | 112.8(2)   | O(3)  | C(18) | C(12) | 112.4(2)   |
| O(3)  | C(18) | H(4)                | 102.2(15)  | C(9)  | C(18) | C(12) | 115.4(2)   |
| C(9)  | C(18) | H(4)                | 106.6(15)  | C(12) | C(18) | H(4)  | 106.2(14)  |
| O(3)  | C(19) | C(21)               | 114.3(3)   | O(3)  | C(19) | H(7)  | 98.5(14)   |
| O(3)  | C(19) | H(8)                | 110.4(13)  | C(21) | C(19) | H(7)  | 111.8(14)  |
| C(21) | C(19) | H(8)                | 108.4(13)  | H(7)  | C(19) | H(8)  | 113(2)     |
| C(9)  | C(20) | C(22)               | 122.9(3)   | C(9)  | C(20) | H(1)  | 117.6(19)  |
| C(22) | C(20) | H(1)                | 119.4(19)  | N(1)  | C(21) | C(19) | 114.5(3)   |
| N(1)  | C(21) | H(9)                | 105.0(16)  | N(1)  | C(21) | H(10) | 108.4(18)  |
| C(19) | C(21) | H(9)                | 108.1(15)  | C(19) | C(21) | H(10) | 105.1(17)  |
| H(9)  | C(21) | H(10)               | 116(2)     | C(20) | C(22) | C(23) | 119.0(4)   |
| C(20) | C(22) | H(2)                | 122.5(19)  | C(23) | C(22) | H(2)  | 118.5(19)  |
| Cl(2) | C(23) | C(17)               | 119.2(3)   | Cl(2) | C(23) | C(22) | 119.0(3)   |
| C(17) | C(23) | C(22)               | 121.7(3)   | O(4)  | C(25) | C(26) | 120.2(4)   |



Table 4. Bond angles ( $^{\circ}$ ) (continued)

| atom  | atom  | atom  | angle | atom  | atom  | atom  | angle    |
|-------|-------|-------|-------|-------|-------|-------|----------|
| O(4)  | C(25) | H(11) | 106.2 | O(4)  | C(25) | H(12) | 107.0    |
| C(26) | C(25) | H(11) | 104.6 | C(26) | C(25) | H(12) | 109.1    |
| H(11) | C(25) | H(12) | 109.5 | O(7)  | C(26) | C(25) | 120.3(4) |
| O(7)  | C(26) | H(13) | 105.8 | O(7)  | C(26) | H(14) | 107.5    |
| C(25) | C(26) | H(13) | 104.4 | C(25) | C(26) | H(14) | 109.0    |
| H(13) | C(26) | H(14) | 109.5 | N(2)  | C(28) | C(2)  | 174.1(8) |

Symmetry Operators:

(1)  $-X+2, -Y, -Z$

Table 5. Torsion Angles( $^{\circ}$ )

| atom1 | atom2 | atom3 | atom4 | angle     | atom1 | atom2 | atom3 | atom4 | angle       |
|-------|-------|-------|-------|-----------|-------|-------|-------|-------|-------------|
| O(5)  | S(1)  | N(1)  | C(11) | 175.6(2)  | O(5)  | S(1)  | N(1)  | C(21) | -40.0(2)    |
| O(5)  | S(1)  | C(15) | C(9)  | 126.2(2)  | O(5)  | S(1)  | C(15) | C(17) | -53.6(2)    |
| O(6)  | S(1)  | N(1)  | C(11) | 46.4(2)   | O(6)  | S(1)  | N(1)  | C(21) | -169.2(2)   |
| O(6)  | S(1)  | C(15) | C(9)  | -105.3(2) | O(6)  | S(1)  | C(15) | C(17) | 74.9(2)     |
| N(1)  | S(1)  | C(15) | C(9)  | 10.5(3)   | N(1)  | S(1)  | C(15) | C(17) | -169.3(2)   |
| C(15) | S(1)  | N(1)  | C(11) | -68.9(2)  | C(15) | S(1)  | N(1)  | C(21) | 75.5(2)     |
| C(18) | O(3)  | C(19) | C(21) | 64.5(4)   | C(19) | O(3)  | C(18) | C(9)  | 48.5(3)     |
| C(19) | O(3)  | C(18) | C(12) | -84.0(3)  | C(13) | O(4)  | C(25) | C(26) | -26.0(5)    |
| C(25) | O(4)  | C(13) | C(1)  | -168.6(3) | C(25) | O(4)  | C(13) | C(14) | 10.3(4)     |
| C(14) | O(7)  | C(26) | C(25) | -24.9(6)  | C(26) | O(7)  | C(14) | C(13) | 9.0(5)      |
| C(26) | O(7)  | C(14) | C(16) | -173.0(3) | S(1)  | N(1)  | C(11) | C(12) | 81.4(3)     |
| S(1)  | N(1)  | C(11) | C(16) | -96.7(3)  | S(1)  | N(1)  | C(21) | C(19) | -64.9(3)    |
| C(11) | N(1)  | C(21) | C(19) | 78.5(4)   | C(21) | N(1)  | C(11) | C(12) | -63.6(4)    |
| C(21) | N(1)  | C(11) | C(16) | 118.2(3)  | C(12) | C(1)  | C(13) | O(4)  | 179.3(3)    |
| C(12) | C(1)  | C(13) | C(14) | 0.5(5)    | C(13) | C(1)  | C(12) | C(11) | 2.0(5)      |
| C(13) | C(1)  | C(12) | C(18) | -177.5(3) | C(15) | C(9)  | C(18) | O(3)  | -82.0(4)    |
| C(15) | C(9)  | C(18) | C(12) | 49.0(4)   | C(18) | C(9)  | C(15) | S(1)  | -2.9(4)     |
| C(18) | C(9)  | C(15) | C(17) | 176.9(3)  | C(15) | C(9)  | C(20) | C(22) | -0.8(5)     |
| C(20) | C(9)  | C(15) | S(1)  | 180.0(2)  | C(20) | C(9)  | C(15) | C(17) | -0.2(4)     |
| C(18) | C(9)  | C(20) | C(22) | -178.2(3) | C(20) | C(9)  | C(18) | O(3)  | 95.1(3)     |
| C(20) | C(9)  | C(18) | C(12) | -133.9(3) | N(1)  | C(11) | C(12) | C(1)  | 179.0(3)    |
| N(1)  | C(11) | C(12) | C(18) | -1.6(4)   | N(1)  | C(11) | C(16) | C(14) | 179.6(3)    |
| C(12) | C(11) | C(16) | C(14) | 1.5(5)    | C(16) | C(11) | C(12) | C(1)  | -3.0(5)     |
| C(16) | C(11) | C(12) | C(18) | 176.5(3)  | C(1)  | C(12) | C(18) | O(3)  | -114.7(3)   |
| C(1)  | C(12) | C(18) | C(9)  | 114.2(3)  | C(11) | C(12) | C(18) | O(3)  | 65.9(4)     |
| C(11) | C(12) | C(18) | C(9)  | -65.3(4)  | O(4)  | C(13) | C(14) | O(7)  | -2.8(5)     |
| O(4)  | C(13) | C(14) | C(16) | 179.2(3)  | C(1)  | C(13) | C(14) | O(7)  | 176.0(3)    |
| C(1)  | C(13) | C(14) | C(16) | -2.0(5)   | O(7)  | C(14) | C(16) | C(11) | -177.0(3)   |
| C(13) | C(14) | C(16) | C(11) | 1.0(5)    | S(1)  | C(15) | C(17) | C(23) | -179.1(2)   |
| C(9)  | C(15) | C(17) | C(23) | 1.1(5)    | C(15) | C(17) | C(23) | Cl(2) | 179.0(2)    |
| C(15) | C(17) | C(23) | C(22) | -1.0(5)   | O(3)  | C(19) | C(21) | N(1)  | -59.0(4)    |
| C(9)  | C(20) | C(22) | C(23) | 0.9(5)    | C(20) | C(22) | C(23) | Cl(2) | -179.93(19) |
| C(20) | C(22) | C(23) | C(17) | 0.1(4)    | O(4)  | C(25) | C(26) | O(7)  | 35.0(7)     |

The sign is positive if when looking from atom 2 to atom 3 a clock-wise motion of atom 1 would superimpose it on atom 4.

Table 6. Distances beyond the asymmetric unit out to 3.60 Å

| atom  | atom                | distance | atom  | atom                 | distance |
|-------|---------------------|----------|-------|----------------------|----------|
| Cl(2) | H(2) <sup>1)</sup>  | 3.52(2)  | Cl(2) | H(11) <sup>2)</sup>  | 3.408    |
| Cl(2) | H(12) <sup>2)</sup> | 3.172    | Cl(2) | H(12) <sup>3)</sup>  | 3.198    |
| Cl(2) | H(13) <sup>4)</sup> | 3.429    | Cl(2) | H(14) <sup>2)</sup>  | 3.358    |
| Cl(2) | H(15)               | 2.953    | Cl(2) | H(16) <sup>5)</sup>  | 3.588    |
| O(3)  | C(1) <sup>6)</sup>  | 3.284(4) | O(3)  | C(18) <sup>6)</sup>  | 3.511(4) |
| O(3)  | C(20) <sup>6)</sup> | 3.566(4) | O(3)  | H(1) <sup>6)</sup>   | 3.08(2)  |
| O(3)  | H(4) <sup>6)</sup>  | 2.77(2)  | O(3)  | H(5) <sup>6)</sup>   | 2.51(2)  |
| O(3)  | H(11) <sup>5)</sup> | 3.479    | O(4)  | C(1) <sup>1)</sup>   | 3.363(4) |
| O(4)  | H(5) <sup>1)</sup>  | 2.82(2)  | O(4)  | H(11) <sup>6)</sup>  | 3.171    |
| O(4)  | H(12) <sup>6)</sup> | 3.560    | O(5)  | N(2) <sup>5)</sup>   | 3.108(2) |
| O(5)  | C(17) <sup>7)</sup> | 3.476(4) | O(5)  | C(28) <sup>5)</sup>  | 3.221(8) |
| O(5)  | C(28) <sup>7)</sup> | 3.374(8) | O(5)  | H(3) <sup>7)</sup>   | 2.46(2)  |
| O(5)  | H(17) <sup>5)</sup> | 3.312    | O(6)  | N(2)                 | 3.210(2) |
| O(6)  | C(19) <sup>8)</sup> | 3.319(4) | O(6)  | C(26) <sup>9)</sup>  | 3.561(5) |
| O(6)  | C(28)               | 3.393(8) | O(6)  | C(28) <sup>10)</sup> | 3.397(8) |
| O(6)  | H(7) <sup>8)</sup>  | 2.81(2)  | O(6)  | H(8) <sup>8)</sup>   | 3.28(2)  |
| O(6)  | H(9) <sup>8)</sup>  | 3.00(2)  | O(6)  | H(13) <sup>9)</sup>  | 3.487    |
| O(6)  | H(14) <sup>9)</sup> | 3.010    | O(7)  | C(21) <sup>11)</sup> | 3.349(4) |
| O(7)  | H(6) <sup>9)</sup>  | 2.70(2)  | O(7)  | H(9) <sup>11)</sup>  | 2.64(3)  |
| O(7)  | H(10) <sup>8)</sup> | 2.85(2)  | O(7)  | H(10) <sup>11)</sup> | 3.22(2)  |
| N(1)  | H(6) <sup>11)</sup> | 3.53(2)  | N(2)  | O(5) <sup>8)</sup>   | 3.108(2) |
| N(2)  | O(5) <sup>7)</sup>  | 3.108(2) | N(2)  | O(6)                 | 3.210(2) |
| N(2)  | O(6) <sup>10)</sup> | 3.210(2) | N(2)  | H(3)                 | 3.29(2)  |
| N(2)  | H(3) <sup>10)</sup> | 3.29(2)  | C(1)  | O(3) <sup>1)</sup>   | 3.284(4) |
| C(1)  | O(4) <sup>6)</sup>  | 3.363(4) | C(1)  | C(18) <sup>1)</sup>  | 3.594(5) |
| C(1)  | H(4) <sup>1)</sup>  | 2.96(2)  | C(1)  | H(7) <sup>8)</sup>   | 3.17(2)  |
| C(1)  | H(11) <sup>6)</sup> | 3.476    | C(2)  | C(17)                | 3.403(8) |
| C(2)  | C(17) <sup>8)</sup> | 3.411(8) | C(2)  | C(22) <sup>1)</sup>  | 3.566(8) |
| C(2)  | C(26) <sup>4)</sup> | 3.575(9) | C(2)  | H(2) <sup>1)</sup>   | 2.85(2)  |
| C(2)  | H(3)                | 3.15(2)  | C(2)  | H(8) <sup>8)</sup>   | 2.84(2)  |
| C(2)  | H(12) <sup>4)</sup> | 3.527    | C(2)  | H(13) <sup>4)</sup>  | 2.751    |
| C(9)  | H(1) <sup>1)</sup>  | 3.35(2)  | C(9)  | H(17) <sup>5)</sup>  | 3.198    |
| C(11) | H(7) <sup>8)</sup>  | 3.06(2)  | C(12) | H(4) <sup>1)</sup>   | 3.58(2)  |
| C(12) | H(7) <sup>8)</sup>  | 3.12(2)  | C(13) | H(4) <sup>1)</sup>   | 3.59(2)  |
| C(13) | H(5) <sup>1)</sup>  | 3.42(2)  | C(13) | H(7) <sup>8)</sup>   | 3.14(2)  |
| C(14) | H(7) <sup>8)</sup>  | 3.04(2)  | C(14) | H(9) <sup>11)</sup>  | 3.40(3)  |
| C(14) | H(10) <sup>8)</sup> | 3.06(2)  | C(15) | H(15)                | 3.432    |

Table 6. Distances beyond the asymmetric unit out to 3.60 Å (continued)

| atom  | atom                 | distance | atom  | atom                | distance |
|-------|----------------------|----------|-------|---------------------|----------|
| C(15) | H(17) <sup>5j</sup>  | 2.874    | C(16) | H(7) <sup>8j</sup>  | 3.01(2)  |
| C(16) | H(9) <sup>11j</sup>  | 3.56(2)  | C(16) | H(10) <sup>8j</sup> | 3.39(2)  |
| C(16) | H(10) <sup>11j</sup> | 3.24(2)  | C(17) | O(5) <sup>7j</sup>  | 3.476(4) |
| C(17) | C(2) <sup>5j</sup>   | 3.411(8) | C(17) | C(2)                | 3.403(8) |
| C(17) | C(28)                | 3.571(9) | C(17) | H(15)               | 2.581    |
| C(17) | H(16) <sup>5j</sup>  | 3.145    | C(17) | H(17) <sup>5j</sup> | 2.894    |
| C(18) | O(3) <sup>1j</sup>   | 3.511(4) | C(18) | C(1) <sup>6j</sup>  | 3.594(5) |
| C(18) | H(5) <sup>6j</sup>   | 3.00(2)  | C(19) | O(6) <sup>5j</sup>  | 3.319(4) |
| C(19) | H(1) <sup>6j</sup>   | 3.23(2)  | C(19) | H(4) <sup>6j</sup>  | 3.55(2)  |
| C(19) | H(17) <sup>5j</sup>  | 3.035    | C(20) | O(3) <sup>1j</sup>  | 3.566(4) |
| C(20) | C(20) <sup>6j</sup>  | 3.430(5) | C(20) | C(20) <sup>1j</sup> | 3.430(5) |
| C(20) | C(22) <sup>6j</sup>  | 3.432(5) | C(20) | H(1) <sup>6j</sup>  | 3.58(2)  |
| C(20) | H(1) <sup>1j</sup>   | 3.14(2)  | C(20) | H(2) <sup>6j</sup>  | 3.55(2)  |
| C(20) | H(8) <sup>1j</sup>   | 3.58(2)  | C(20) | H(17) <sup>5j</sup> | 3.458    |
| C(20) | H(17) <sup>6j</sup>  | 3.479    | C(21) | O(7) <sup>11j</sup> | 3.349(4) |
| C(21) | H(6) <sup>11j</sup>  | 3.11(2)  | C(22) | C(2) <sup>6j</sup>  | 3.566(8) |
| C(22) | C(20) <sup>1j</sup>  | 3.432(5) | C(22) | C(22) <sup>6j</sup> | 3.442(5) |
| C(22) | C(22) <sup>1j</sup>  | 3.442(5) | C(22) | H(1) <sup>1j</sup>  | 3.30(2)  |
| C(22) | H(2) <sup>6j</sup>   | 3.37(2)  | C(22) | H(2) <sup>1j</sup>  | 3.38(2)  |
| C(22) | H(15) <sup>6j</sup>  | 3.189    | C(22) | H(17) <sup>5j</sup> | 3.495    |
| C(22) | H(17) <sup>6j</sup>  | 3.279    | C(23) | H(2) <sup>1j</sup>  | 3.33(2)  |
| C(23) | H(15)                | 2.728    | C(23) | H(16) <sup>5j</sup> | 3.180    |
| C(23) | H(17) <sup>5j</sup>  | 3.217    | C(25) | H(5) <sup>1j</sup>  | 3.30(2)  |
| C(25) | H(16) <sup>12j</sup> | 3.217    | C(26) | O(6) <sup>9j</sup>  | 3.561(5) |
| C(26) | C(2) <sup>12j</sup>  | 3.575(9) | C(26) | H(6) <sup>9j</sup>  | 3.37(3)  |
| C(26) | H(9) <sup>11j</sup>  | 3.36(3)  | C(26) | H(10) <sup>8j</sup> | 3.54(2)  |
| C(26) | H(16) <sup>12j</sup> | 2.767    | C(28) | O(5) <sup>8j</sup>  | 3.221(8) |
| C(28) | O(5) <sup>7j</sup>   | 3.374(8) | C(28) | O(6)                | 3.393(8) |
| C(28) | O(6) <sup>10j</sup>  | 3.397(8) | C(28) | C(17)               | 3.571(9) |
| C(28) | H(3)                 | 3.00(2)  | C(28) | H(8) <sup>8j</sup>  | 3.13(2)  |
| C(28) | H(13) <sup>4j</sup>  | 3.124    | H(1)  | O(3) <sup>1j</sup>  | 3.08(2)  |
| H(1)  | C(9) <sup>6j</sup>   | 3.35(2)  | H(1)  | C(19) <sup>1j</sup> | 3.23(2)  |
| H(1)  | C(20) <sup>6j</sup>  | 3.14(2)  | H(1)  | C(20) <sup>1j</sup> | 3.58(2)  |
| H(1)  | C(22) <sup>6j</sup>  | 3.30(2)  | H(1)  | H(1) <sup>6j</sup>  | 3.41(4)  |
| H(1)  | H(1) <sup>1j</sup>   | 3.41(4)  | H(1)  | H(7) <sup>1j</sup>  | 3.06(3)  |
| H(1)  | H(8) <sup>1j</sup>   | 2.95(3)  | H(1)  | H(15) <sup>6j</sup> | 3.248    |
| H(1)  | H(17) <sup>6j</sup>  | 3.078    | H(2)  | Cl(2) <sup>6j</sup> | 3.52(2)  |

Table 6. Distances beyond the asymmetric unit out to 3.60 Å (continued)

| atom | atom                 | distance | atom | atom                 | distance |
|------|----------------------|----------|------|----------------------|----------|
| H(2) | C(2) <sup>6j</sup>   | 2.85(2)  | H(2) | C(20) <sup>1j</sup>  | 3.55(2)  |
| H(2) | C(22) <sup>6j</sup>  | 3.38(2)  | H(2) | C(22) <sup>1j</sup>  | 3.37(2)  |
| H(2) | C(23) <sup>6j</sup>  | 3.33(2)  | H(2) | H(2) <sup>6j</sup>   | 3.39(4)  |
| H(2) | H(2) <sup>1j</sup>   | 3.39(4)  | H(2) | H(12) <sup>3j</sup>  | 3.291    |
| H(2) | H(15) <sup>6j</sup>  | 2.463    | H(2) | H(16) <sup>6j</sup>  | 2.895    |
| H(2) | H(17) <sup>6j</sup>  | 2.708    | H(3) | O(5) <sup>7j</sup>   | 2.46(2)  |
| H(3) | N(2)                 | 3.29(2)  | H(3) | C(2)                 | 3.15(2)  |
| H(3) | C(28)                | 3.00(2)  | H(3) | H(15)                | 2.473    |
| H(3) | H(16) <sup>5j</sup>  | 3.289    | H(3) | H(17) <sup>5j</sup>  | 3.324    |
| H(4) | O(3) <sup>1j</sup>   | 2.77(2)  | H(4) | C(1) <sup>6j</sup>   | 2.96(2)  |
| H(4) | C(12) <sup>6j</sup>  | 3.58(2)  | H(4) | C(13) <sup>6j</sup>  | 3.59(2)  |
| H(4) | C(19) <sup>1j</sup>  | 3.55(2)  | H(4) | H(4) <sup>6j</sup>   | 3.45(3)  |
| H(4) | H(4) <sup>1j</sup>   | 3.45(3)  | H(4) | H(5) <sup>6j</sup>   | 2.54(3)  |
| H(4) | H(7) <sup>1j</sup>   | 3.16(3)  | H(5) | O(3) <sup>1j</sup>   | 2.51(2)  |
| H(5) | O(4) <sup>6j</sup>   | 2.82(2)  | H(5) | C(13) <sup>6j</sup>  | 3.42(2)  |
| H(5) | C(18) <sup>1j</sup>  | 3.00(2)  | H(5) | C(25) <sup>6j</sup>  | 3.30(2)  |
| H(5) | H(4) <sup>1j</sup>   | 2.54(3)  | H(5) | H(5) <sup>6j</sup>   | 3.41(3)  |
| H(5) | H(5) <sup>1j</sup>   | 3.41(3)  | H(5) | H(11) <sup>6j</sup>  | 2.793    |
| H(6) | O(7) <sup>9j</sup>   | 2.70(2)  | H(6) | N(1) <sup>11j</sup>  | 3.53(2)  |
| H(6) | C(21) <sup>11j</sup> | 3.11(2)  | H(6) | C(26) <sup>9j</sup>  | 3.37(3)  |
| H(6) | H(6) <sup>9j</sup>   | 3.55(4)  | H(6) | H(7) <sup>8j</sup>   | 3.40(3)  |
| H(6) | H(9) <sup>8j</sup>   | 3.52(4)  | H(6) | H(9) <sup>11j</sup>  | 3.24(4)  |
| H(6) | H(10) <sup>8j</sup>  | 3.33(4)  | H(6) | H(10) <sup>11j</sup> | 2.47(4)  |
| H(6) | H(14) <sup>9j</sup>  | 2.972    | H(7) | O(6) <sup>5j</sup>   | 2.81(2)  |
| H(7) | C(1) <sup>5j</sup>   | 3.17(2)  | H(7) | C(11) <sup>5j</sup>  | 3.06(2)  |
| H(7) | C(12) <sup>5j</sup>  | 3.12(2)  | H(7) | C(13) <sup>5j</sup>  | 3.14(2)  |
| H(7) | C(14) <sup>5j</sup>  | 3.04(2)  | H(7) | C(16) <sup>5j</sup>  | 3.01(2)  |
| H(7) | H(1) <sup>6j</sup>   | 3.06(3)  | H(7) | H(4) <sup>6j</sup>   | 3.16(3)  |
| H(7) | H(6) <sup>5j</sup>   | 3.40(3)  | H(7) | H(17) <sup>5j</sup>  | 3.454    |
| H(8) | O(6) <sup>5j</sup>   | 3.28(2)  | H(8) | C(2) <sup>5j</sup>   | 2.84(2)  |
| H(8) | C(20) <sup>6j</sup>  | 3.58(2)  | H(8) | C(28) <sup>5j</sup>  | 3.13(2)  |
| H(8) | H(1) <sup>6j</sup>   | 2.95(3)  | H(8) | H(15) <sup>5j</sup>  | 3.196    |
| H(8) | H(16) <sup>5j</sup>  | 3.550    | H(8) | H(17) <sup>5j</sup>  | 2.015    |
| H(9) | O(6) <sup>5j</sup>   | 3.00(2)  | H(9) | O(7) <sup>11j</sup>  | 2.64(3)  |
| H(9) | C(14) <sup>11j</sup> | 3.40(3)  | H(9) | C(16) <sup>11j</sup> | 3.56(2)  |
| H(9) | C(26) <sup>11j</sup> | 3.36(3)  | H(9) | H(6) <sup>5j</sup>   | 3.52(4)  |
| H(9) | H(6) <sup>11j</sup>  | 3.24(4)  | H(9) | H(13) <sup>11j</sup> | 3.079    |

Table 6. Distances beyond the asymmetric unit out to 3.60 Å (continued)

| atom  | atom                 | distance | atom  | atom                 | distance |
|-------|----------------------|----------|-------|----------------------|----------|
| H(10) | O(7) <sup>5)</sup>   | 2.85(2)  | H(10) | O(7) <sup>11)</sup>  | 3.22(2)  |
| H(10) | C(14) <sup>5)</sup>  | 3.06(2)  | H(10) | C(16) <sup>5)</sup>  | 3.39(2)  |
| H(10) | C(16) <sup>11)</sup> | 3.24(2)  | H(10) | C(26) <sup>5)</sup>  | 3.54(2)  |
| H(10) | H(6) <sup>5)</sup>   | 3.33(4)  | H(10) | H(6) <sup>11)</sup>  | 2.47(4)  |
| H(10) | H(11) <sup>5)</sup>  | 3.402    | H(10) | H(14) <sup>5)</sup>  | 3.475    |
| H(11) | Cl(2) <sup>13)</sup> | 3.408    | H(11) | O(3) <sup>8)</sup>   | 3.479    |
| H(11) | O(4) <sup>1)</sup>   | 3.171    | H(11) | C(1) <sup>1)</sup>   | 3.476    |
| H(11) | H(5) <sup>1)</sup>   | 2.793    | H(11) | H(10) <sup>8)</sup>  | 3.402    |
| H(12) | Cl(2) <sup>13)</sup> | 3.172    | H(12) | Cl(2) <sup>14)</sup> | 3.198    |
| H(12) | O(4) <sup>1)</sup>   | 3.560    | H(12) | C(2) <sup>12)</sup>  | 3.527    |
| H(12) | H(2) <sup>14)</sup>  | 3.291    | H(12) | H(15) <sup>12)</sup> | 3.546    |
| H(12) | H(16) <sup>12)</sup> | 2.718    | H(13) | Cl(2) <sup>12)</sup> | 3.429    |
| H(13) | O(6) <sup>9)</sup>   | 3.487    | H(13) | C(2) <sup>12)</sup>  | 2.751    |
| H(13) | C(28) <sup>12)</sup> | 3.124    | H(13) | H(9) <sup>11)</sup>  | 3.079    |
| H(13) | H(15) <sup>12)</sup> | 2.821    | H(13) | H(16) <sup>12)</sup> | 2.058    |
| H(13) | H(17) <sup>12)</sup> | 3.565    | H(14) | Cl(2) <sup>13)</sup> | 3.358    |
| H(14) | O(6) <sup>9)</sup>   | 3.010    | H(14) | H(6) <sup>9)</sup>   | 2.972    |
| H(14) | H(10) <sup>8)</sup>  | 3.475    | H(14) | H(16) <sup>12)</sup> | 2.777    |
| H(15) | Cl(2)                | 2.953    | H(15) | C(15)                | 3.432    |
| H(15) | C(17)                | 2.581    | H(15) | C(22) <sup>1)</sup>  | 3.189    |
| H(15) | C(23)                | 2.728    | H(15) | H(1) <sup>1)</sup>   | 3.248    |
| H(15) | H(2) <sup>1)</sup>   | 2.463    | H(15) | H(3)                 | 2.473    |
| H(15) | H(8) <sup>8)</sup>   | 3.196    | H(15) | H(12) <sup>4)</sup>  | 3.546    |
| H(15) | H(13) <sup>4)</sup>  | 2.821    | H(16) | Cl(2) <sup>8)</sup>  | 3.588    |
| H(16) | C(17) <sup>8)</sup>  | 3.145    | H(16) | C(23) <sup>8)</sup>  | 3.180    |
| H(16) | C(25) <sup>4)</sup>  | 3.217    | H(16) | C(26) <sup>4)</sup>  | 2.767    |
| H(16) | H(2) <sup>1)</sup>   | 2.895    | H(16) | H(3) <sup>8)</sup>   | 3.289    |
| H(16) | H(8) <sup>8)</sup>   | 3.550    | H(16) | H(12) <sup>4)</sup>  | 2.718    |
| H(16) | H(13) <sup>4)</sup>  | 2.058    | H(16) | H(14) <sup>4)</sup>  | 2.777    |
| H(17) | O(5) <sup>8)</sup>   | 3.312    | H(17) | C(9) <sup>8)</sup>   | 3.198    |
| H(17) | C(15) <sup>8)</sup>  | 2.874    | H(17) | C(17) <sup>8)</sup>  | 2.894    |
| H(17) | C(19) <sup>8)</sup>  | 3.035    | H(17) | C(20) <sup>8)</sup>  | 3.458    |
| H(17) | C(20) <sup>1)</sup>  | 3.479    | H(17) | C(22) <sup>8)</sup>  | 3.495    |
| H(17) | C(22) <sup>1)</sup>  | 3.279    | H(17) | C(23) <sup>8)</sup>  | 3.217    |
| H(17) | H(1) <sup>1)</sup>   | 3.078    | H(17) | H(2) <sup>1)</sup>   | 2.708    |
| H(17) | H(3) <sup>8)</sup>   | 3.324    | H(17) | H(7) <sup>8)</sup>   | 3.454    |
| H(17) | H(8) <sup>8)</sup>   | 2.015    | H(17) | H(13) <sup>4)</sup>  | 3.565    |

Symmetry Operators:

- |                        |                       |
|------------------------|-----------------------|
| (1) X+1/2,-Y+1/2,Z     | (2) X-1,Y,Z-1         |
| (3) X+1/2-1,-Y+1/2,Z-1 | (4) X,Y,Z-1           |
| (5) X-1,Y,Z            | (6) X+1/2-1,-Y+1/2,Z  |
| (7) -X+1,-Y,-Z         | (8) X+1,Y,Z           |
| (9) -X+2,-Y,-Z+1       | (10) -X+2,-Y,-Z       |
| (11) -X+1,-Y,-Z+1      | (12) X,Y,Z+1          |
| (13) X+1,Y,Z+1         | (14) X+1/2,-Y+1/2,Z+1 |
